# Supplementary material for: Characterisation of Colorectal Cancer Cell Lines through Proteomic Profiling of Their Extracellular Vesicles
Source: MDPI journal article supplement (doi:10.3390/proteomes11010003), 2023-01-11
Supplement: s1 [file s1]

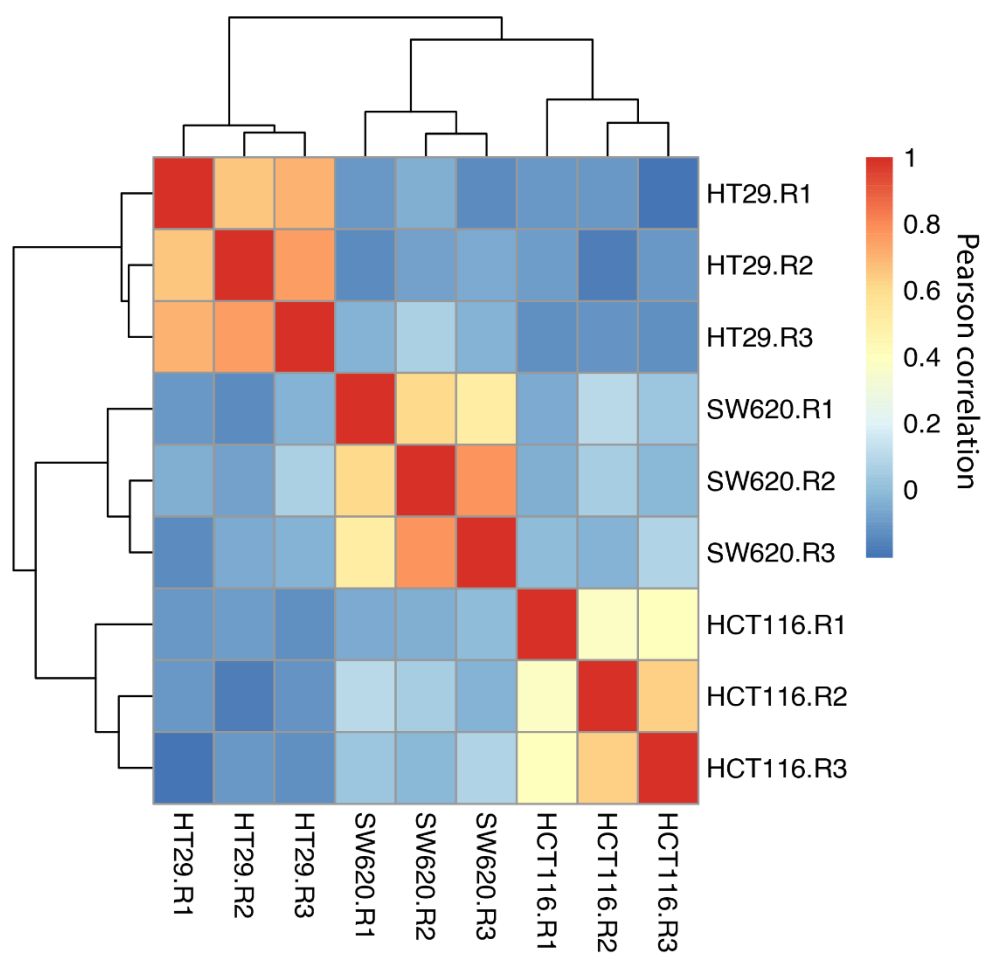

**Figure S3: Replicates from phospho-proteomics cluster together with Pearson correlation:** Heatmap showing Pearson correlation for all sample comparisons using scaled abundance values.
