# Supplementary material for: Characterisation of Colorectal Cancer Cell Lines through Proteomic Profiling of Their Extracellular Vesicles
Source: Proteomes. 2023 Jan 11;11(1):3. doi: 10.3390/proteomes11010003 (PMC9844407; doi:10.3390/proteomes11010003)
Supplement: Supplementary file 1 [file proteomes-11-00003-s001.zip]

Archive with 11 entries (11 files):
- Figure S1.pdf
- Figure S2.pdf
- Figure S3.pdf
- Table S1.xlsx
- Table S2.xlsx
- Table S3.xlsx
- Table S4.xlsx
- Table S5.xlsx
- Table S6.xlsx
- Table S7.xlsx
- Table S8.xlsx
