# Supplementary material for: Characterisation of Colorectal Cancer Cell Lines through Proteomic Profiling of Their Extracellular Vesicles
Source: Proteomes. 2023 Jan 11;11(1):3. doi: 10.3390/proteomes11010003 (PMC9844407; doi:10.3390/proteomes11010003)
Supplement: Supplementary file 1 [file proteomes-11-00003-s001.zip › Table S1.xlsx]

## Sheet: Sheet 1
Protein.FDR.Confidence..Combined	Accession	Description	Exp..q.value..Combined	Contaminant	Sum.PEP.Score	Coverage	Peptides	PSMs	Unique.Peptides	AAs	MW..kDa.	calc..pI	Score.Sequest.HT..Sequest.HT	Peptides by Search Engine-Sequest.HT	Abundances Scaled - HCT116_R1	Abundances Scaled - HCT116_R2	Abundances Scaled - HCT116_R3	Abundances Scaled - HT29_R1	Abundances Scaled - HT29_R2	Abundances Scaled - HT29_R3	Abundances Scaled - SW620_R1	Abundances Scaled - SW620_R2	Abundances Scaled - SW620_R3	Abundances Normalized - HCT116_R1	Abundances Normalized - HCT116_R2	Abundances Normalized - HCT116_R3	Abundances Normalized - HT29_R1	Abundances Normalized - HT29_R2	Abundances Normalized - HT29_R3	Abundances Normalized - SW620_R1	Abundances Normalized - SW620_R2	Abundances Normalized - SW620_R3	Abundance - HCT116_R1	Abundance - HCT116_R2	Abundance - HCT116_R3	Abundance - HT29_R1	Abundance - HT29_R2	Abundance - HT29_R3	Abundance - SW620_R1	Abundance - SW620_R2	Abundance - SW620_R3	Abundances Count - HCT116_R1	Abundances Count - HCT116_R2	Abundances Count - HCT116_R3	Abundances Count - HT29_R1	Abundances Count - HT29_R2	Abundances Count - HT29_R1	Abundances Count - SW620_R1	Abundances Count - SW620_R2
High	P49327	Fatty acid synthase [OS=Homo sapiens]	0	FALSE	2132.32	75	136	1852	135	2511	273.3	6.44	7245.37	136	120.1	136.1	117.9	103.8	109.3	95.2	72	74.3	71.2	3527384700	3996516324	3463444092	3049901829	3211202257	2797559143	2113853870	2182349239	2091571264	2629886462	3615109403	3306635070	2308145503	2157860868	2451962944	1497036459	1399978503	2091571264	138	146	139	139	140	139	136	139
High	P78527	DNA-dependent protein kinase catalytic subunit [OS=Homo sapiens]	0	FALSE	2068.19	59	203	1599	203	4128	468.8	7.12	5297.63	203	122.9	118.2	118.2	104.1	109.1	115	64.9	71.1	76.5	2219782181	2134893796	2134901224	1880783805	1970758555	2077035678	1172310943	1284083276	1382125768	1654986797	1931150534	2038242590	1423364726	1324308601	1820449275	8.30233e+08	8.2374e+08	1382125768	203	207	211	207	187	208	184	172
High	Q14204	Cytoplasmic dynein 1 heavy chain 1 [OS=Homo sapiens]	0	FALSE	1991.57	55	190	1274	190	4646	532.1	6.4	4356.95	190	93.4	92.2	91.4	81.2	82.4	80.5	125.4	126.8	126.8	1096111701	1081289265	1071538608	9.5248e+08	9.6645e+08	9.43818e+08	1470685265	1487694748	1486944819	8.1722e+08	9.78097e+08	1023024206	720830432	6.49434e+08	8.27224e+08	1041542887	9.54357e+08	1486944819	177	180	186	174	169	181	184	175
High	P35579-1	Myosin-9 [OS=Homo sapiens]	0	FALSE	1814.56	65	136	1398	115	1960	226.4	5.6	5009.26	136	75.7	85.9	78.9	100.9	104	108.4	121.2	105.9	119.1	1343924018	1524759742	1399878049	1790585890	1844841021	1922689301	2150957480	1879072342	2112764341	1001979620	1379244530	1336497927	1355103541	1239694647	1685170063	1523313326	1205426170	2112764341	110	115	119	119	104	119	115	108
High	Q15149-8	Isoform 8 of Plectin [OS=Homo sapiens]	0	FALSE	1697.99	50	186	1296	1	4525	513.4	5.76	4385.03	186	97.7	91.5	121.6	236.5	157.2	195.4				369120	345818	459614	893719	594009	738408				275202	312815	438805	676361	399162	647189				1	1	1	1	1	1
High	Q15149-4	Isoform 4 of Plectin [OS=Homo sapiens]	0	FALSE	1695.87	50	186	1296	1	4547	515.9	5.8	4383.2	186	112.1	98.5	123.7	112	103.5	84.2	54.5	101.2	110.4	1.45118e+07	1.27582e+07	1.60169e+07	1.45095e+07	1.33988e+07	1.08981e+07	7.05296e+06	1.31071e+07	14298843	10819441	11540656	15291720	10980671	9003711	9551831	4.99493e+06	8408242	14298843	1	1	1	1	1	1	1	1
High	Q15149-1	plectin [OS=Homo sapiens]	0	FALSE	1695.28	49	186	1300	1	4684	531.5	5.96	4390.28	186	174.2	169.7	144.3	53.4	58.7	47.8	54.9	98.8	98.2	5.62236e+06	5.47557e+06	4.65596e+06	1.72445e+06	1.89485e+06	1.54314e+06	1.77182e+06	3.18849e+06	3169991	4191825	4.95301e+06	4.44516e+06	1.30505e+06	1.2733e+06	1.35251e+06	1.25481e+06	2.04542e+06	3169991	1	1	1	1	1	1	1	1
High	Q00610-1	Clathrin heavy chain 1 [OS=Homo sapiens]	0	FALSE	1688.53	70	103	1328	84	1675	191.5	5.69	5112.37	103	115.5	117.4	112.4	90.8	95.4	93.9	93.1	90.4	91	1688406566	1715263774	1642836174	1326857875	1394728097	1371521066	1361034927	1320336665	1330199471	1258812959	1551567839	1568456012	1004157251	9.37228e+08	1202090343	9.63888e+08	8.46997e+08	1330199471	94	99	95	88	84	95	92	89
High	Q15149-3	Isoform 3 of Plectin [OS=Homo sapiens]	0	FALSE	1688	49	184	1287	1	4570	517.7	5.74	4363.93	184		164.2	176.7	281.3		162.9			115		1.51551e+06	1.63105e+06	2.59681e+06		1.50368e+06			1061618		1370881	1.5572e+06	1965245		1.31793e+06			1061618		1	1	1		1
High	O75369-1	Filamin-B [OS=Homo sapiens]	0	FALSE	1578.56	71	124	1062	116	2602	278	5.73	3714.91	124	64.8	60.8	58.2	160.6	180.6	180.2	67.8	65.8	61.2	8.67604e+08	8.14727e+08	7.79228e+08	2151325426	2419646239	2413916431	9.07907e+08	881987098	820462607	6.46853e+08	7.36973e+08	7.43948e+08	1628108833	1625951751	2115713497	6.42982e+08	565795316	820462607	111	113	116	118	119	120	110	101
High	Q09666-1	Neuroblast differentiation-associated protein AHNAK [OS=Homo sapiens]	0	FALSE	1418.51	56	161	758	161	5890	628.7	6.15	2567.62	161	121.7	139	140.7	126.5	115.1	174.3	29.4	18.5	34.8	1097951066	1254383729	1269607126	1141816710	1038239003	1572777265	2.65552e+08	1.66594e+08	3.13876e+08	8.18591e+08	1134671811	1212125081	8.64119e+08	6.97675e+08	1378484377	1.88065e+08	1.0687e+08	3.13876e+08	141	143	145	139	132	147	104	81
High	P21333	Filamin-A [OS=Homo sapiens]	0	FALSE	1309.56	60	107	983	102	2647	280.6	6.06	3385.87	107	101.5	99.3	96.7	83.3	94.1	94.8	121	111	98.3	1462007675	1430684522	1392122619	1199969430	1355208091	1364839109	1743376898	1598212511	1415890963	1090018390	1294147364	1329093628	9.08129e+08	9.10672e+08	1196233841	1234663765	1025254400	1415890963	98	101	103	98	99	101	103	99
High	Q13813	Spectrin alpha chain, non-erythrocytic 1 [OS=Homo sapiens]	0	FALSE	1285.63	63	119	731	119	2472	284.4	5.35	2737.79	119	61.7	53.5	51.9	127.7	141.9	127.8	103.9	120.2	111.5	4.44714e+08	3.85354e+08	3.7417e+08	9.20396e+08	1022708114	9.21447e+08	7.48693e+08	8.667e+08	8.03456e+08	3.31562e+08	348577772	3.57229e+08	6.9655e+08	6.87238e+08	8.07616e+08	530226202	5.55989e+08	8.03456e+08	96	108	106	114	108	124	108	108
High	P22314-2	Isoform 2 of Ubiquitin-like modifier-activating enzyme 1 [OS=Homo sapiens]	0	FALSE	1246.55	81	60	1484	60	1018	113.7	5.6	5279.18	60	85.4	77	82.5	96.1	89.6	89.3	132.7	125.9	121.5	1537088047	1384921291	1483853760	1728351841	1612609199	1606162255	2387211931	2264503341	2185228893	1145995514	1252751540	1416671599	1308005226	1083639711	1407745155	1690629303	1452680415	2185228893	76	84	83	75	73	77	78	75
High	P46940	Ras GTPase-activating-like protein IQGAP1 [OS=Homo sapiens]	0	FALSE	1223.1	68	90	790	86	1657	189.1	6.48	3076.61	90	84.2	85.6	80.7	161.2	158.6	161.2	58.5	51.8	58.2	6.3589e+08	6.4624e+08	609528676	1217018406	1197595526	1217067501	4.41981e+08	3.91171e+08	4.39569e+08	4.74096e+08	5.84566e+08	5.81932e+08	9.21031e+08	8.04759e+08	1066717184	313012306	2.50937e+08	4.39569e+08	91	87	85	90	86	86	87	76
High	P08238	Heat shock protein HSP 90-beta [OS=Homo sapiens]	0	FALSE	1196.83	76	66	2312	44	724	83.2	5.03	7741.79	66	135.1	149.9	145.4	74	69.2	69.6	90.3	87.4	79	6772925269	7513814116	7289524184	3708704690	3470129338	3488602976	4526510774	4382557474	3960013379	5049640452	6796734419	6959487628	2806723144	2331854461	3057638744	3205685954	2811413564	3960013379	55	58	57	56	55	55	57	49
High	P07900	Heat shock protein HSP 90-alpha [OS=Homo sapiens]	0	FALSE	1189.59	72	62	2376	41	732	84.6	5.02	8110.99	62	142.6	155.2	160.8	51.8	51	49.1	104.2	99.3	86.1	5219199388	5681749625	5885756128	1896118721	1867106972	1795828505	3813805297	3636738900	3152034401	3891240389	5139512722	5619275816	1434970089	1254656901	1573981003	2700946200	2332970448	3152034401	53	52	55	45	46	47	51	47
High	P13639	Elongation factor 2 [OS=Homo sapiens]	0	FALSE	1102.57	79	62	2289	61	858	95.3	6.83	8474.41	62	128	128.1	137.2	72	70.1	70.3	91.4	97.6	105.3	4897786096	4901057989	5247515450	2754098899	2682140120	2690226259	3495039646	3734212240	4027622748	3651606627	4433326273	5009931777	2084283805	1802342159	2357889417	2475195590	2395499662	4027622748	69	73	75	69	72	69	71	72
High	P42704	Leucine-rich PPR motif-containing protein, mitochondrial [OS=Homo sapiens]	0	FALSE	1096.44	75	90	942	90	1394	157.8	6.13	3341.73	90	115.8	108.3	106.7	86.8	85.8	81.4	101.4	111.9	102.1	1447787082	1354046606	1334206622	1085207969	1072881428	1017817448	1268015769	1399128727	1276816231	1079416046	1224823376	1273799805	8.21278e+08	7.20954e+08	8.92081e+08	8.98012e+08	8.97542e+08	1276816231	88	94	89	87	81	91	89	86
High	Q92616	eIF-2-alpha kinase activator GCN1 [OS=Homo sapiens]	0	FALSE	1094.31	56	109	889	109	2671	292.6	7.47	2971.04	109	115.6	104.4	105.7	107.5	110.9	101.5	85.3	88.2	80.8	6.71634e+08	6.06651e+08	6.14064e+08	624476398	6.44511e+08	589750672	4.95556e+08	5.12386e+08	469582946	5.00745e+08	548755288	5.86262e+08	4.726e+08	4.33098e+08	5.16896e+08	3.50954e+08	3.28696e+08	469582946	99	104	104	98	97	107	100	93
High	Q7Z406-6	Isoform 6 of Myosin-14 [OS=Homo sapiens]	0	FALSE	1037.82	54	99	477	88	2003	228.5	5.6	1625.7	99	15.8	17	15.3	267.8	301.6	270.1	3.9	3.7	4.8	7.80549e+07	8.39274e+07	7.55821e+07	1321592178	1488364826	1332802700	1.90289e+07	1.80643e+07	2.3656e+07	5.81948e+07	7.59178e+07	7.21601e+07	1000172207	1000150087	1168155047	1.34763e+07	1.15882e+07	2.3656e+07	54	61	60	84	83	86	20	13
High	O75643-1	U5 small nuclear ribonucleoprotein 200 kDa helicase [OS=Homo sapiens]	0	FALSE	1035.38	60	90	567	90	2136	244.4	6.06	2190.59	90	101.2	90.7	95.7	69.5	76.6	72.4	137.9	131.5	124.5	4.55747e+08	4.08611e+08	4.30972e+08	3.13021e+08	3.45104e+08	3.26254e+08	6.21425e+08	5.92618e+08	5.60658e+08	3.39788e+08	3.69615e+08	4.1146e+08	236892315	2.31903e+08	2.8595e+08	4.40095e+08	3.80165e+08	5.60658e+08	83	85	84	77	73	80	84	83
High	Q9Y490	Talin-1 [OS=Homo sapiens]	0	FALSE	1034.4	53	79	626	75	2541	269.6	6.07	2290.03	79	94.3	99.4	101.6	98.2	96.3	100.8	108.7	98.9	101.9	3.91232e+08	4.12184e+08	4.21317e+08	4.07402e+08	3.99603e+08	4.18145e+08	4.50768e+08	4.10122e+08	4.2252e+08	291688177	3.72848e+08	4.02242e+08	3.08319e+08	2.68525e+08	3.6649e+08	3.19235e+08	2.63094e+08	4.2252e+08	73	74	72	70	68	74	71	69
High	P05783	Keratin, type I cytoskeletal 18 [OS=Homo sapiens]	0	FALSE	1018.3	84	40	1419	28	430	48	5.45	5169.24	40	33.9	31.3	43.7	180.3	164.9	162.9	77.7	95.6	109.6	1612715776	1487490961	2078488622	8570825002	7836731203	7740359595	3692932357	4543192001	5210865464	1202380729	1345532490	1984384095	6486343591	5266119742	6784155018	2615343689	2914460721	5210865464	40	38	40	46	46	46	40	44
High	P07814	Bifunctional glutamate/proline--tRNA ligase [OS=Homo sapiens]	0	FALSE	994.132	68	75	651	75	1512	170.5	7.33	2375.24	75	90.2	85.8	98.8	103.8	113.3	109.8	105.1	100.9	92.4	6.94096e+08	6.60068e+08	7.59883e+08	7.98797e+08	8.7169e+08	8.44823e+08	8.08739e+08	7.76479e+08	710887060	5.17492e+08	5.97074e+08	725479026	6.04525e+08	585757498	7.40458e+08	5.72751e+08	4.98112e+08	710887060	73	74	78	73	70	78	70	68
High	P04406	glyceraldehyde-3-phosphate dehydrogenase [OS=Homo sapiens]	0	FALSE	989.645	93	32	2118	32	335	36	8.46	8553.53	32	96.8	106.8	107.5	92.7	95.5	92.7	97.9	102.4	107.7	9870681105	10886292346	10954336832	9450505346	9729469566	9452325530	9978267253	10438070181	10979271753	7359211657	9847360707	10458374200	7152079849	6538000403	8284633406	7066633171	6696029035	10979271753	58	61	59	57	56	57	59	55
High	P63261	Actin, cytoplasmic 2 [OS=Homo sapiens]	0	FALSE	980.786	95	34	3230	1	375	41.8	5.48	10628.1	34	94.3	185	165.8	44	27.7	90.7	72.6	29.3	190.5	7.59684e+07	149008260	1.33509e+08	3.53945e+07	2.23264e+07	7.30616e+07	5.84374e+07	2.36142e+07	1.53419e+08	5.66392e+07	1.34788e+08	1.27464e+08	2.67863e+07	1.50029e+07	6.40359e+07	4.13855e+07	1.51485e+07	1.53419e+08	4	4	4	4	4	4	4	4
High	P60709	Actin, cytoplasmic 1 [OS=Homo sapiens]	0	FALSE	962.674	95	34	3200	1	375	41.7	5.48	10511.3	34	55.7	128.2	116.4	83.8	48.7	136.4	88.4	33.5	209	3.51857e+07	8.10309e+07	7.35489e+07	5.29552e+07	3.07946e+07	8.6206e+07	5.58872e+07	2.11488e+07	132128825	2.62331e+07	7.32977e+07	7.0219e+07	4.00762e+07	2.06933e+07	75556578	3.95795e+07	1.35669e+07	132128825	3	3	3	3	3	3	3	3
High	P07437	tubulin beta chain [OS=Homo sapiens]	0	FALSE	957.672	82	34	2135	6	444	49.6	4.89	7822.11	34	96.3	95.7	95.6	78.7	77.2	88.7	140.4	101.6	125.9	9.50699e+08	9.44638e+08	9.43386e+08	7.77025e+08	7.61714e+08	8.75418e+08	1386025881	1002483135	1243112556	708805348	854486838	9.00674e+08	5.88048e+08	5.11856e+08	7.67273e+08	9.81587e+08	6.43094e+08	1243112556	10	12	12	13	13	13	12	10
High	P68371	Tubulin beta-4B chain [OS=Homo sapiens]	0	FALSE	953.513	82	34	1991	1	445	49.8	4.89	7226.98	34	98.8	59.9	48.9	120.8	123.8	109.3	141.2	115.3	82.1	4.11974e+06	2.49846e+06	2.03806e+06	5.03761e+06	5.16533e+06	4.55848e+06	5.89256e+06	4.81183e+06	3.42406e+06	3.07152e+06	2.26002e+06	1.94578e+06	3.81243e+06	3.471e+06	3.99535e+06	4.17313e+06	3.08679e+06	3.42406e+06	1	1	1	1	1	1	1	1
High	P10809	60 kDa heat shock protein, mitochondrial [OS=Homo sapiens]	0	FALSE	940.138	76	45	2617	45	573	61	5.87	10740.1	45	115.3	120.7	130.7	84.6	83.1	96	87.5	81.9	100.3	4835052744	5062849981	5479809046	3549819426	3483311771	4027476290	3667884080	3433221901	4205243660	3604834979	4579677671	5231708174	2686479829	2340712780	3529942395	2597604439	2202414156	4205243660	62	67	68	62	62	66	62	60
High	P14618	Pyruvate kinase PKM [OS=Homo sapiens]	0	FALSE	922.982	79	45	1752	5	531	57.9	7.84	6109.7	45	90.2	93.2	65.9	117.5	135.1	114.5	113.3	93.5	76.8	3.4834e+08	3.59833e+08	2.54404e+08	4.53951e+08	5.2175e+08	4.42368e+08	4.37521e+08	3.60977e+08	2.96801e+08	2.59709e+08	3.25492e+08	2.42886e+08	3.43547e+08	3.50605e+08	3.87721e+08	3.09854e+08	231566685	2.96801e+08	5	5	5	5	5	5	5	5
High	Q14974	Importin subunit beta-1 [OS=Homo sapiens]	0	FALSE	912.382	76	47	710	47	876	97.1	4.78	2521.19	47	104.1	92.7	111.6	88.9	91.5	78.3	109.9	116.7	106.3	7.73897e+08	6.89307e+08	8.30093e+08	6.61116e+08	6.8051e+08	5.82343e+08	8.17332e+08	8.67954e+08	7.90208e+08	576988618	6.23523e+08	7.9251e+08	5.00328e+08	457288634	5.10404e+08	578836570	5.56793e+08	7.90208e+08	51	58	53	49	52	54	52	52
High	P13010	X-ray repair cross-complementing protein 5 [OS=Homo sapiens]	0	FALSE	899.148	76	50	849	50	732	82.7	5.81	3576.12	50	121.9	125.3	133.4	68.3	63.7	69.1	96.3	105.1	116.8	1221032365	1254830771	1336170477	6.83439e+08	6.37632e+08	6.921e+08	9.64197e+08	1052721807	1169468903	910356187	1135076189	1275674744	5.17222e+08	4.28475e+08	6.06601e+08	6.82847e+08	6.75322e+08	1169468903	57	55	57	58	53	57	57	55
High	P05787 P05787	SWISS-PROT:P05787 Tax_Id=9606 Gene_Symbol=KRT8 Keratin, type II cytoskeletal 8 Keratin, type II cytoskeletal 8 [OS=Homo sapiens]	0	TRUE	896.862	77	47	1706	23	483	53.7	5.59	5363.13	47	50.9	59.6	61.6	152.5	137.8	168.5	70.4	80.1	118.6	1705675931	1999795212	2065460696	5115141347	4619678774	5650176593	2362057680	2685712606	3978119939	1271688353	1808945063	1971946014	3871105091	3104327680	4952182572	1672815002	1722886441	3978119939	28	32	32	35	34	35	33	29
High	P58107	epiplakin [OS=Homo sapiens]	0	FALSE	879.811	55	77	309	72	5090	555.3	5.6	1133.96	77	56.2	48.1	62.9	236	255.9	215.7	9.8	7.1	8.2	5.73967e+07	4.90956e+07	6.4178e+07	2.40892e+08	2.61198e+08	2.20177e+08	1.00402e+07	7.28317e+06	8.36507e+06	4.27929e+07	4.44102e+07	6.12723e+07	1.82305e+08	1.75519e+08	1.92978e+08	7.11047e+06	4.67216e+06	8.36507e+06	48	51	55	69	69	68	7	7
High	P11142-1	Heat shock cognate 71 kDa protein [OS=Homo sapiens]	0	FALSE	874.352	78	46	2733	35	646	70.9	5.52	8418.83	46	87.7	115.9	114.9	91.2	91.6	108.3	81.1	93.4	115.9	2458737927	3252247908	3223177847	2557497522	2569812425	3038733179	2275939548	2620070299	3250369823	1833143288	2941870128	3077246989	1935497184	1726860294	2663343568	1611825931	1680776857	3250369823	52	55	53	49	50	53	51	49
High	P04350	Tubulin beta-4A chain [OS=Homo sapiens]	0	FALSE	847.467	80	31	1812	4	444	49.6	4.88	6503.48	31	274.3	311.2	314.4							9.8195e+06	1.11394e+07	1.12543e+07							7.32106e+06	1.00764e+07	10744776							3	3	3
High	O00410	Importin-5 [OS=Homo sapiens]	0	FALSE	838.598	76	60	549	57	1097	123.6	4.94	2019.96	60	76.3	99.1	92.7	68.2	64.3	74.2	139.5	138.5	147.2	3.50519e+08	4.55167e+08	4.25981e+08	3.13332e+08	2.95566e+08	3.41135e+08	6.40969e+08	636446474	6.76156e+08	2.61334e+08	4.11728e+08	4.06694e+08	2.37128e+08	198613845	2.98993e+08	453935491	4.08281e+08	6.76156e+08	55	59	60	55	49	57	56	54
High	Q14697-1	Neutral alpha-glucosidase AB [OS=Homo sapiens]	0	FALSE	835.156	76	49	608	2	944	106.8	6.14	2288.36	49	46	166.1	66.9	105.1	124	106.1	169.2	67.9	48.6	5.09829e+06	1.84133e+07	7.41786e+06	1.16501e+07	1.37477e+07	1.17561e+07	1.8757e+07	7.52862e+06	5.38361e+06	3.80109e+06	1.66561e+07	7.08202e+06	8.81672e+06	9.23818e+06	1.03038e+07	1.32838e+07	4.82962e+06	5.38361e+06	2	2	2	2	2	2	2	2
High	Q02952-2	Isoform 2 of A-kinase anchor protein 12 [OS=Homo sapiens]	0	FALSE	835.057	57	60	254	1	1684	181.6	4.44	1022.28	60	63.8	529.2	307							216013	1.79083e+06	1.03907e+06							161051	1.61993e+06	992029							1	1	1
High	P14618-2	Isoform M1 of Pyruvate kinase PKM [OS=Homo sapiens]	0	FALSE	834.438	74	43	1608	3	531	58	7.71	5505.84	43	222.7	187.9	236.1	29	38.5	33.5	50.5	55.6	46.3	5.49403e+07	4.63455e+07	5.8237e+07	7.14865e+06	9.49404e+06	8.25546e+06	1.24602e+07	1.37086e+07	1.14286e+07	4.09614e+07	4.19225e+07	5.56003e+07	5.41005e+06	6.3798e+06	7.23562e+06	8.82433e+06	8794105	1.14286e+07	3	3	3	2	2	2	3	2
High	Q02952-1	A-kinase anchor protein 12 [OS=Homo sapiens]	0	FALSE	832.284	54	60	250	1	1782	191.4	4.41	1007.79	60
High	Q14697-2	Isoform 2 of Neutral alpha-glucosidase AB [OS=Homo sapiens]	0	FALSE	817.586	75	49	594	2	966	109.4	6.24	2230.31	49	96.5	121	89.2	84.9	91.4	85.3	120.6	113.5	97.6	4.66319e+06	5.84727e+06	4.30837e+06	4.1032e+06	4.41664e+06	4.12326e+06	5.82764e+06	5.48236e+06	4.71866e+06	3.4767e+06	5289238	4.11331e+06	3.10528e+06	2.96789e+06	3.6139e+06	4.12715e+06	3.51694e+06	4.71866e+06	2	2	2	2	2	2	2	2
High	P68104	Elongation factor 1-alpha 1 [OS=Homo sapiens]	0	FALSE	812.872	76	27	1868	14	462	50.1	9.01	7490.24	27	91.2	118	115.3	84	81	87	112.7	85.2	125.5	1760547128	2277185578	2226136315	1620853604	1564185717	1679266195	2175920623	1644128978	2422888392	1312598271	2059862722	2125346971	1226651272	1051100143	1471818207	1540992284	1054709844	2422888392	32	35	35	34	25	31	32	27
High	P0DMV8	heat shock 70 kDa protein 1A [OS=Homo sapiens]	0	FALSE	808.132	73	39	1200	26	641	70	5.66	3577.89	39	111.7	134.1	121.7	155.3	156.1	147.4	27.4	24.5	21.9	9.7595e+08	1172052185	1062996603	1356533602	1363833045	1287969546	2.39695e+08	2.13719e+08	1.91139e+08	7.27632e+08	1060197564	1014868944	1026615645	9.16467e+08	1128860352	1.69753e+08	1.37101e+08	1.91139e+08	30	32	32	32	31	32	31	28
High	Q6P2Q9	Pre-mRNA-processing-splicing factor 8 [OS=Homo sapiens]	0	FALSE	798.186	47	81	542	81	2335	273.4	8.84	1838.87	81	102.5	95.7	98.5	71.8	72.5	71.7	129	135.2	123.1	5.6278e+08	5.25529e+08	5.41096e+08	3.94374e+08	3.98014e+08	3.93671e+08	7.08171e+08	7.42194e+08	6.75827e+08	4.19588e+08	4.75375e+08	5.16597e+08	2.98459e+08	2.67457e+08	3.45039e+08	501528129	4.76118e+08	6.75827e+08	78	77	75	69	59	74	77	72
High	Q71U36	tubulin alpha-1A chain [OS=Homo sapiens]	0	FALSE	796.288	78	31	970	1	451	50.1	5.06	3803.6	31	147.6	196.8	175.2	12	12	6.2	142.6	114.1	93.6	1.16265e+07	1.55046e+07	1.37975e+07	944450	942200	487460	1.12286e+07	8.98967e+06	7371707	8.66826e+06	1.40249e+07	1.31728e+07	714754	633139	427241	7.95214e+06	5.76688e+06	7371707	1	1	1	1	1	1	1	1
High	P29401	Transketolase [OS=Homo sapiens]	0	FALSE	788.268	80	36	585	36	623	67.8	7.66	2398.89	36	139.5	128.5	126.5	123.1	114.5	115.8	50.8	44.1	57.2	1887564050	1738698382	1711781184	1665731844	1550010084	1566521909	687325178	596321455	7.74258e+08	1407297350	1572765969	1634279504	1260614827	1041574413	1373001776	486765365	3.82541e+08	7.74258e+08	45	45	46	43	44	44	42	39
High	Q9BQE3	Tubulin alpha-1C chain [OS=Homo sapiens]	0	FALSE	787.47	83	34	1570	3	449	49.9	5.1	5467.2	34	65.9	150.1	140.1	81.2	55.5	142	74.1	41.9	149.2	1.30517e+07	2.96974e+07	2.7731e+07	1.60622e+07	1.0985e+07	2.81069e+07	1.46571e+07	8.29918e+06	2.95234e+07	9.73086e+06	2.68632e+07	2.64755e+07	1.21558e+07	7381682	2.46347e+07	1.03802e+07	5.32393e+06	2.95234e+07	2	3	3	2	2	3	3	2
High	P11216	Glycogen phosphorylase, brain form [OS=Homo sapiens]	0	FALSE	783.227	74	58	527	52	843	96.6	6.86	1866.38	58	30.1	26.4	23.9	226	226.2	223.5	46.4	47.5	50	2.50864e+08	2.20268e+08	1.9883e+08	1883139619	1885418064	1863006263	3.86869e+08	3.95487e+08	416694716	1.87035e+08	1.99247e+08	1.89828e+08	1425147591	1266961573	1632859963	2.73982e+08	2.53705e+08	416694716	43	47	47	54	54	58	46	45
High	P27708	CAD protein [OS=Homo sapiens]	0	FALSE	758.214	50	68	504	67	2225	242.8	6.46	1822.59	68	106.8	96.2	99.2	71.2	79.9	78.4	125.6	122.7	120	5.04207e+08	4.54271e+08	4.68366e+08	3.36244e+08	377386475	3.70136e+08	5.93334e+08	5.79511e+08	5.66498e+08	3.75918e+08	4.10918e+08	447160585	2.54468e+08	2.53596e+08	3.24411e+08	4.20201e+08	3.71757e+08	5.66498e+08	68	68	67	63	61	68	66	63
High	P06733-1	alpha-enolase [OS=Homo sapiens]	0	FALSE	744.647	75	35	2142	29	434	47.1	7.39	7754.33	35	132.1	97.6	96.1	105	96.1	102.9	88.3	93.5	88.4	5417774938	4003061120	3943593117	4308124210	3940892134	4220035077	3623545428	3836102674	3626831223	4039290912	3621029596	3765045127	3260359867	2648197231	3698713450	2566203697	2460862443	3626831223	40	37	38	39	40	37	38	37
High	Q7Z6Z7	E3 ubiquitin-protein ligase HUWE1 [OS=Homo sapiens]	0	FALSE	743.114	28	75	380	75	4374	481.6	5.22	1347.07	75	52.7	47	49	94.4	95.8	99.6	149.2	160.7	151.7	1.39828e+08	1.24698e+08	1.29872e+08	2.50275e+08	2.54237e+08	2.64085e+08	3.95642e+08	4.26347e+08	4.02319e+08	1.04251e+08	1.12797e+08	1.23992e+08	1.89406e+08	170841674	2.31461e+08	2.80195e+08	2.73502e+08	4.02319e+08	59	59	66	68	60	70	73	65
High	Q01082-1	Spectrin beta chain, non-erythrocytic 1 [OS=Homo sapiens]	0	FALSE	728.036	43	74	435	4	2364	274.4	5.57	1556.98	74	48.7	92	69.8	126.2	143.6	163.1	89.1	69.3	98.2	2.72077e+06	5.13745e+06	3.89727e+06	7.04484e+06	8.01683e+06	9.10905e+06	4.97744e+06	3.86715e+06	5.48305e+06	2.0285e+06	4647159	3.72082e+06	5.33149e+06	5387143	7.98376e+06	3.52504e+06	2.48078e+06	5.48305e+06	2	3	3	2	3	2	3	2
High	O15067	Phosphoribosylformylglycinamidine synthase [OS=Homo sapiens]	0	FALSE	725.786	60	46	340	46	1338	144.6	5.76	1328.09	46	63.8	52.5	65.5	53.4	51.1	48.2	195.9	192.3	177.2	1.15296e+08	9.48487e+07	1.18291e+08	9.65269e+07	9.24057e+07	8.71685e+07	3.5385e+08	3.47441e+08	3.20126e+08	8.59603e+07	8.57969e+07	1.12935e+08	7.30509e+07	6.20947e+07	7.64002e+07	250597321	2.22884e+08	3.20126e+08	41	42	44	42	36	44	44	44
High	P55072	Transitional endoplasmic reticulum ATPase [OS=Homo sapiens]	0	FALSE	721.829	74	52	539	52	806	89.3	5.26	1979.75	52	73.5	73.8	74.6	114.9	117.9	117.8	115.2	101.6	110.7	7.0789e+08	7.11249e+08	7.18448e+08	1107024470	1136270023	1134541605	1109875123	9.79119e+08	1066285558	5.27776e+08	6.43371e+08	6.8592e+08	8.37789e+08	7.6355e+08	9.94386e+08	786016265	6.28106e+08	1066285558	49	51	54	54	47	55	53	48
High	Q9BVA1	Tubulin beta-2B chain [OS=Homo sapiens]	0	FALSE	719.366	79	32	1787	1	445	49.9	4.89	6500.2	32		25.3	28.9				274.2	324.6	247		372500	424590				4.02925e+06	4.77098e+06	3.6293e+06		336950	405366				2.85352e+06	3060587	3.6293e+06		1	1				1	1
High	Q01082-3	Isoform 2 of Spectrin beta chain, non-erythrocytic 1 [OS=Homo sapiens]	0	FALSE	708.503	46	71	430	1	2155	251.2	5.53	1539.04	71				259.7	312		328.3						792341	952059		1.00187e+06						599638	639764		709527						1	1		1
High	P14625	Endoplasmin [OS=Homo sapiens]	0	FALSE	707.793	55	49	1188	44	803	92.4	4.84	3816.76	49	106	124.9	120.7	101.2	95.7	101.3	86.4	76.8	86.9	1824019043	2149350980	2077329123	1741648631	1647113775	1743034207	1486646028	1321413118	1495000474	1359920563	1944227999	1983277092	1318068148	1106826066	1527708644	1052846338	8.47687e+08	1495000474	46	44	45	44	44	45	42	43
High	O43707	Alpha-actinin-4 [OS=Homo sapiens]	0	FALSE	698.384	74	58	631	37	911	104.8	5.44	2184.9	58	77.7	88.3	51.1	115.2	121.5	107.9	101.7	115.9	120.7	2.84864e+08	3.23948e+08	1.87517e+08	4.22327e+08	4.45528e+08	3.95604e+08	3.72901e+08	4.25055e+08	4.42793e+08	2.12384e+08	2.93032e+08	1.79027e+08	319614127	2.99386e+08	346732953	2.64089e+08	2.72673e+08	4.42793e+08	36	35	35	38	37	38	36	38
High	P50395-1	Rab GDP dissociation inhibitor beta [OS=Homo sapiens]	0	FALSE	697.191	84	37	510	29	445	50.6	6.47	2045.78	37	55	64.5	62.9	126.9	118.4	133.9	116.8	99.2	122.3	2.56511e+08	3.01137e+08	2.93637e+08	5.92474e+08	5.52749e+08	6.25031e+08	5.45177e+08	4.63043e+08	5.70635e+08	1.91245e+08	2.72398e+08	2.80343e+08	4.48381e+08	3.71436e+08	5.47818e+08	3.86095e+08	2.97043e+08	5.70635e+08	33	35	36	35	33	37	34	34
High	P53621-1	coatomer subunit alpha [OS=Homo sapiens]	0	FALSE	693.196	68	61	486	61	1224	138.3	7.66	1690.93	61	82.2	84.6	77.7	129.9	133.1	122.9	93.3	92.3	84	4.74204e+08	4.87982e+08	4.4779e+08	7.48703e+08	767191019	7.08467e+08	5.38166e+08	5.32369e+08	4.84267e+08	3.53549e+08	4.41411e+08	4.27516e+08	5.66614e+08	5.15536e+08	6.20947e+08	3.8113e+08	3.41515e+08	4.84267e+08	63	64	64	65	63	63	65	60
High	Q5T4S7-1	e3 ubiquitin-protein ligase UBR4 [OS=Homo sapiens]	0	FALSE	693.067	26	78	409	78	5183	573.5	6.04	1340.86	78	103.4	88.8	90.9	113.4	138.6	103.3	91.2	100.9	69.5	1.25886e+08	1.08106e+08	1.10627e+08	1.38069e+08	1.68636e+08	1.25688e+08	1.10946e+08	1.22808e+08	8.45585e+07	9.38558e+07	9.77893e+07	1.05619e+08	1.0449e+08	1.1332e+08	1.10161e+08	7.85724e+07	7.87812e+07	8.45585e+07	66	67	66	70	68	73	70	64
High	Q08211	Atp-dependent rna helicase a [OS=Homo sapiens]	0	FALSE	691.835	63	58	523	58	1270	140.9	6.84	1845.83	58	107.1	101.5	95.9	87.8	83	85.8	109.6	114.5	114.7	1043581695	9.88912e+08	9.34454e+08	8.55692e+08	8.08297e+08	8.35986e+08	1067824648	1115207951	1117446264	7.78056e+08	8.94535e+08	8.92146e+08	647582208	543158844	7.32713e+08	7.56236e+08	7.15407e+08	1117446264	61	60	63	58	53	60	56	55
High	Q9BQG0	Myb-binding protein 1A [OS=Homo sapiens]	0	FALSE	689.501	61	61	445	61	1328	148.8	9.28	1614.34	61	109	100	101.8	72.9	68.3	72.5	118	140.5	117.2	3.25701e+08	2.9891e+08	3.04391e+08	2.17847e+08	2.04104e+08	2.16654e+08	3.5262e+08	4.19971e+08	3.5022e+08	2.4283e+08	2.70383e+08	2.90609e+08	1.64865e+08	1.37154e+08	1.8989e+08	2.49726e+08	2.69412e+08	3.5022e+08	57	65	65	58	50	63	61	56
High	P09874	Poly [ADP-ribose] polymerase 1 [OS=Homo sapiens]	0	FALSE	686.44	65	52	502	52	1014	113	8.88	1839.57	52	118.4	145.4	128	55.6	59.8	59.5	122.4	98.7	112.3	7.7514e+08	9.51763e+08	8.37723e+08	3.63787e+08	3.91385e+08	3.89656e+08	801352623	6.46139e+08	735222722	5.77916e+08	8.60932e+08	7.99794e+08	2.75312e+08	2.63003e+08	3.4152e+08	5.6752e+08	4.14499e+08	735222722	47	50	53	41	44	46	45	45
High	Q86VP6-1	cullin-associated nedd8-dissociated protein 1 [OS=Homo sapiens]	0	FALSE	662.948	54	49	528	49	1230	136.3	5.78	1810.97	49	106.4	97.4	98.9	98.4	107.8	91.8	96.4	105.1	97.8	5.53709e+08	5.07035e+08	5.14538e+08	5.11895e+08	5.6104e+08	4.77879e+08	501409903	5.46621e+08	5.08787e+08	4.12825e+08	4.58647e+08	4.91242e+08	3.87399e+08	3.77007e+08	418843976	3.551e+08	3.50658e+08	5.08787e+08	50	49	51	49	49	50	49	48
High	Q13085-1	Acetyl-CoA carboxylase 1 [OS=Homo sapiens]	0	FALSE	662.178	45	71	246	71	2346	265.4	6.37	782.21	71	65.6	68.9	59.1	201.4	202.3	198.9	36.5	33.2	34.2	1.40225e+08	1.47326e+08	1.26271e+08	4.30519e+08	432440746	4.25218e+08	7.80287e+07	7.10753e+07	7.30219e+07	1.04546e+08	1.33266e+08	120553654	3.25814e+08	2.90591e+08	3.72689e+08	5.52601e+07	4.55949e+07	7.30219e+07	53	60	61	65	62	69	45	43
High	Q13885	Tubulin beta-2A chain [OS=Homo sapiens]	0	FALSE	660.853	71	32	1234	2	445	49.9	4.89	4325.53	32	152.5	140.5	164.6	95.7	120.8	90.9	53.4	40.3	41.3	1.12545e+07	1.03682e+07	1.21509e+07	7.06009e+06	8.91374e+06	6.71065e+06	3.9437e+06	2.9748e+06	3.04931e+06	8390939	9378682	11600808	5343027	5.98985e+06	5.88165e+06	2.79294e+06	1.90833e+06	3.04931e+06	1	1	1	1	1	1	1	1
High	P06744	glucose-6-phosphate isomerase [OS=Homo sapiens]	0	FALSE	658.047	70	32	506	23	558	63.1	8.32	2091.6	32	73.7	86.6	99.8	156.8	135.5	166.6	55.4	49.9	75.9	5.31005e+08	6.23923e+08	7.19275e+08	1129926485	976416247	1200618644	3.99394e+08	3.59327e+08	5.471e+08	3.95898e+08	5.64379e+08	6.86709e+08	8.55121e+08	6.56131e+08	1052300336	2.82852e+08	2.30509e+08	5.471e+08	28	32	31	31	29	30	25	22
High	P12814-1	Alpha-actinin-1 [OS=Homo sapiens]	0	FALSE	657.219	73	54	513	33	892	103	5.41	1749.99	54	82.4	95.8	63	54.3	50.4	52.9	153.1	154	194.1	1.66863e+08	1.93897e+08	127478149	1.09893e+08	1.02116e+08	1.07142e+08	3.09938e+08	311830483	3.92925e+08	1.24407e+08	1.75392e+08	1.21707e+08	8.31664e+07	6.86197e+07	9.39062e+07	2.19499e+08	2.00039e+08	3.92925e+08	26	35	32	24	21	27	28	29
High	Q7KZF4	staphylococcal nuclease domain-containing protein 1 [OS=Homo sapiens]	0	FALSE	652.319	69	49	423	49	910	101.9	7.17	1537.96	49	60	62.5	59.9	123.2	124.9	127.8	120.6	111.9	109.1	3.56929e+08	3.71815e+08	356231612	7.32342e+08	7.42884e+08	759886389	717328776	665423085	648481471	2.66113e+08	3.36331e+08	3.40103e+08	5.54232e+08	4.99202e+08	6.66014e+08	5.08014e+08	4.26869e+08	648481471	50	50	47	54	50	52	52	48
High	P11021	78 kDa glucose-regulated protein [OS=Homo sapiens]	0	FALSE	651.339	63	39	1404	37	654	72.3	5.16	4515.8	39	124.3	134.9	126.9	91.1	90.1	96.4	87.8	71.3	77.3	2470681176	2680513991	2521545030	1810192853	1791149410	1915814305	1744105901	1417140796	1536193896	1842047729	2424699550	2407380921	1369941961	1203615005	1679144369	1235180047	9.09097e+08	1536193896	48	46	47	47	47	47	48	45
High	P12956	X-ray repair cross-complementing protein 6 [OS=Homo sapiens]	0	FALSE	648.836	69	49	689	49	609	69.8	6.64	2367.33	49	118.5	131.1	122.9	66.8	66	68.5	104.8	104.5	116.9	1383672268	1530189263	1435075681	7.79755e+08	7.69998e+08	7.99984e+08	1223992811	1219607982	1364519852	1031614433	1384155885	1370101970	5.90113e+08	5.17423e+08	7.01158e+08	8.66835e+08	7.82379e+08	1364519852	53	57	55	49	48	53	52	51
High	Q00839	Heterogeneous nuclear ribonucleoprotein U [OS=Homo sapiens]	0	FALSE	644.611	56	43	612	42	825	90.5	6	2052	43	86.2	89	102.5	83	81.7	85	139.9	114.1	118.5	1369947553	1414043676	1628739598	1319101724	1297646410	1349649483	2222756289	1812165808	1883147641	1021381797	1279094635	1554997665	9.98287e+08	8.71991e+08	1182920664	1574161417	1162505584	1883147641	44	44	46	45	45	44	43	43
High	P26640	Valine--tRNA ligase [OS=Homo sapiens]	0	FALSE	628.218	61	51	489	51	1264	140.4	7.59	1721.03	51	139.1	138.7	140.1	85.7	79.7	81.1	83.8	71.8	80.1	6.74863e+08	6.72958e+08	6.79753e+08	415757374	386887375	393590782	4.06389e+08	3.48223e+08	3.8853e+08	5.03153e+08	6.08734e+08	6.48977e+08	3.14642e+08	259980238	3.44969e+08	2.87806e+08	2.23385e+08	3.8853e+08	46	50	49	48	45	48	45	43
High	Q92598	Heat shock protein 105 kDa [OS=Homo sapiens]	0	FALSE	621.828	63	46	568	43	858	96.8	5.39	2119.83	46	68.9	78	75.9	121.4	128.8	127.4	106	105.4	88.1	4.75363e+08	5.38485e+08	5.24161e+08	8.37908e+08	8.88985e+08	8.79319e+08	7.31829e+08	7.27337e+08	6.08382e+08	354413115	487095035	5.0043e+08	6.34123e+08	597379393	7.70693e+08	5.18283e+08	4.66587e+08	6.08382e+08	40	42	43	41	40	43	39	43
High	P35580	Myosin-10 [OS=Homo sapiens]	0	FALSE	620.493	42	70	312	51	1976	228.9	5.54	1027.46	70	80.2	85.3	72.9	13.3	21	12.7	237	173.2	204.5	9.01412e+07	9.58661e+07	8.19504e+07	1.49057e+07	2.36145e+07	1.42558e+07	266467544	1.94665e+08	2.29961e+08	6.72059e+07	8.67172e+07	7.82401e+07	1.12806e+07	1.58684e+07	1.24947e+07	1.88713e+08	1.24878e+08	2.29961e+08	38	44	43	19	22	17	43	44
High	P00338-1	L-lactate dehydrogenase A chain [OS=Homo sapiens]	0	FALSE	619.194	89	33	1190	31	332	36.7	8.27	3934.57	33	96.5	81.7	99.4	120.3	108.6	96.9	92.1	103.7	100.8	3270652152	2768060433	3366895329	4077527684	3678110034	3282044767	3121136855	3513662971	3417080726	2438476250	2503891010	3214457597	3085845943	2471613146	2876597683	2210396722	2254017157	3417080726	39	37	39	37	39	37	39	39
High	P06576	ATP synthase subunit beta, mitochondrial [OS=Homo sapiens]	0	FALSE	617.511	79	30	1032	30	529	56.5	5.4	3642.96	30	148.3	152.5	157.5	80.9	72.3	84.9	64.1	60.2	79.5	2020127825	2077467745	2146073658	1102581927	9.84436e+08	1156001831	8.7286e+08	8.19505e+08	1082446734	1506131956	1879204930	2048909187	8.34427e+08	6.6152e+08	1013195256	6.18162e+08	5.25713e+08	1082446734	37	39	38	39	37	38	38	34
High	P55060-1	Exportin-2 [OS=Homo sapiens]	0	FALSE	614.888	58	44	680	44	971	110.3	5.77	2417.28	44	82.2	86.3	90	101.7	90.6	97.4	108.4	116.7	126.9	5.51893e+08	579846045	6.04575e+08	6.82851e+08	6.08311e+08	6.54183e+08	7.27923e+08	7.83974e+08	8.52112e+08	4.11471e+08	5.24509e+08	5.77202e+08	5.16777e+08	4.08772e+08	5.73368e+08	515516720	5.0292e+08	8.52112e+08	49	51	52	50	54	53	54	53
High	Q14980-1	nuclear mitotic apparatus protein 1 [OS=Homo sapiens]	0	FALSE	606.594	41	61	342	61	2115	238.1	5.78	1295.45	61	91.7	95.3	79.1	117.5	124	137.3	101	84.1	70	2.46805e+08	2.56454e+08	2.12969e+08	3.16383e+08	3.33864e+08	3.69476e+08	2.71785e+08	226454811	1.88467e+08	1.84008e+08	231979691	2.03327e+08	2.39436e+08	2.24349e+08	3.23833e+08	1.92478e+08	1.45271e+08	1.88467e+08	51	53	56	56	54	55	54	53
High	O95373	Importin-7 [OS=Homo sapiens]	0	FALSE	605.414	49	40	380	40	1038	119.4	4.82	1512.42	40	77.1	70	71.5	109.6	105	96.2	111.7	128.8	130.1	2.06779e+08	1.87638e+08	1.91849e+08	2.93811e+08	2.81668e+08	2.57947e+08	2.99555e+08	3.45416e+08	3.49039e+08	1.54167e+08	1.69731e+08	1.83163e+08	222354572	1.89275e+08	2.26082e+08	212145244	2.21585e+08	3.49039e+08	42	44	41	45	44	44	44	42
High	Q9Y4L1	Hypoxia up-regulated protein 1 [OS=Homo sapiens]	0	FALSE	601.594	48	39	408	39	999	111.3	5.22	1569.24	39	97.8	98.7	93.5	127.4	126.6	133.8	74.6	73.1	74.4	443757485	4.47883e+08	4.24473e+08	5.78027e+08	5.74235e+08	6.07238e+08	3.38694e+08	3.3166e+08	3.37701e+08	3.30849e+08	4.05139e+08	4.05255e+08	437446783	3.85874e+08	5.32223e+08	2.39864e+08	2.1276e+08	3.37701e+08	37	40	40	40	37	41	38	34
High	P04075	fructose-bisphosphate aldolase A [OS=Homo sapiens]	0	FALSE	600.395	74	24	868	22	364	39.4	8.09	2951.46	24	101.6	115	127.4	115.4	126.2	117.6	66.8	67.2	62.7	1414635200	1600943582	1773613411	1605790807	1757356752	1637437338	9.30152e+08	9.36094e+08	8.72341e+08	1054699240	1448157777	1693312250	1215251846	1180907045	1435156675	6.58736e+08	6.00505e+08	8.72341e+08	32	32	32	32	30	31	32	30
High	P07355	Annexin A2 [OS=Homo sapiens]	0	FALSE	598.185	80	38	926	38	339	38.6	7.75	3566.14	38	92.5	102.9	119.1	127.9	141.6	124.7	74.5	67.1	49.6	4384362128	4877231567	5642980204	6061559759	6710697081	5906038125	3531107551	3176852804	2349141973	3268816867	4411773721	5387491683	4587348276	4509448322	5176436274	2500738967	2037953208	2349141973	37	37	38	38	33	39	36	35
High	P49588	Alanine--tRNA ligase, cytoplasmic [OS=Homo sapiens]	0	FALSE	597.65	69	49	460	49	968	106.7	5.53	1738.72	49	94.8	87.7	99.9	71.4	71.5	66.2	121.7	141.8	145	4.33372e+08	4.01038e+08	456954895	326394915	326894157	3.02585e+08	5.56559e+08	6.4857e+08	6.6285e+08	3.23106e+08	3.62765e+08	4.36266e+08	2.47014e+08	2.19666e+08	2.65205e+08	3.94156e+08	4.16058e+08	6.6285e+08	47	45	46	45	44	46	47	45
High	P34932	Heat shock 70 kDa protein 4 [OS=Homo sapiens]	0	FALSE	580.06	66	47	404	44	840	94.3	5.19	1479.37	47	116.6	134.4	125.6	75.5	73	76.8	108.4	90.7	98.9	5.79615e+08	6.68541e+08	6.246e+08	3.7567e+08	3.6288e+08	3.8196e+08	5.39172e+08	4.51203e+08	4.92008e+08	4.32139e+08	6.04739e+08	5.96321e+08	2.84304e+08	2.43848e+08	3.34775e+08	3.81843e+08	2.89447e+08	4.92008e+08	43	45	44	40	37	42	39	38
High	P49368-1	T-complex protein 1 subunit gamma [OS=Homo sapiens]	0	FALSE	579.197	75	37	444	37	545	60.5	6.49	1561.38	37	108.5	113	123	69.7	71.9	84.8	103.2	93.9	132	1329858925	1384835709	1507615458	8.54313e+08	8.81715e+08	1038954607	1265371103	1150772987	1617474350	9.91493e+08	1252674126	1439357476	6.46538e+08	5.92494e+08	9.10607e+08	896138897	7.38222e+08	1617474350	43	44	45	42	36	43	46	39
High	P00352	Retinal dehydrogenase 1 [OS=Homo sapiens]	0	FALSE	570.541	87	36	266	34	501	54.8	6.73	953.02	36	2.6	0.4	1.5	311.5	299.6	278.2	3.6	2.1	0.7	1.54161e+07	2.31961e+06	9.00005e+06	1882258733	1810271727	1681021976	2.19468e+07	1.25984e+07	3.93266e+06	1.14936e+07	2.09824e+06	8.59257e+06	1424480942	1216464803	1473357088	1.55428e+07	8.08189e+06	3.93266e+06	7	5	8	46	46	45	11	8
High	P63241-1	Eukaryotic translation initiation factor 5A-1 [OS=Homo sapiens]	0	FALSE	568.75	82	20	892	20	154	16.8	5.24	3740.92	20	94.7	78.3	75.7	72.4	75.1	72.8	125.8	164.6	140.6	1009440676	8.34417e+08	807344618	7.71852e+08	8.00215e+08	7.75826e+08	1340763500	1754334367	1499023806	7.52601e+08	7.54784e+08	7.70792e+08	5.84132e+08	5.37728e+08	6.79984e+08	949531976	1125406675	1499023806	27	27	28	26	27	25	28	26
High	P38646	Stress-70 protein, mitochondrial [OS=Homo sapiens]	0	FALSE	567.519	68	38	1061	38	679	73.6	6.16	3306.19	38	119.9	110.3	117.6	76.1	79.5	85.2	110.4	97.9	103	1329478667	1223892124	1304520670	8.44516e+08	8.81636e+08	9.45445e+08	1225132966	1086015081	1142425165	9.9121e+08	1107090167	1245457897	6.39124e+08	5.92441e+08	828649428	8.67642e+08	696679404	1142425165	46	48	48	47	42	48	47	43
High	P48643	T-complex protein 1 subunit epsilon [OS=Homo sapiens]	0	FALSE	566.837	81	38	530	9	541	59.6	5.66	1979.82	38	102.2	112.8	123.2	72.3	62.9	90.5	101	99.1	136	2.7039e+08	2.98424e+08	3.25914e+08	1.91381e+08	1.66466e+08	2.39373e+08	2.67214e+08	2.62075e+08	3.59778e+08	2.01592e+08	2.69944e+08	3.11158e+08	1.44836e+08	1.11861e+08	2.09802e+08	1.89242e+08	1.68121e+08	3.59778e+08	10	11	11	9	9	11	9	10
High	P14866	Heterogeneous nuclear ribonucleoprotein L [OS=Homo sapiens]	0	FALSE	563.549	68	22	743	22	589	64.1	8.22	2598.82	22	116.7	96.9	113	75.1	74.6	90.5	120.8	102.4	110.2	487825873	4.05129e+08	4.72514e+08	3.13984e+08	3.11875e+08	3.78281e+08	5.05096e+08	4.28206e+08	4.60854e+08	3.63705e+08	3.66466e+08	4.51121e+08	2.37621e+08	2.09574e+08	3.3155e+08	3.57711e+08	2.74694e+08	4.60854e+08	28	30	31	28	27	32	29	28
High	Q9P2J5	Leucine--tRNA ligase, cytoplasmic [OS=Homo sapiens]	0	FALSE	563.467	54	51	363	51	1176	134.4	7.3	1263.48	51	100.5	96.1	95.3	104.7	107.9	110.4	100.2	93.2	91.9	363030266	3.47236e+08	3.44238e+08	3.7823e+08	3.89836e+08	3.98772e+08	3.62174e+08	3.36686e+08	3.32111e+08	2.70662e+08	3.14097e+08	3.28653e+08	2.86242e+08	2.61962e+08	3.4951e+08	2.56492e+08	2.15984e+08	3.32111e+08	52	50	48	55	51	53	52	48
High	P07195	L-lactate dehydrogenase B chain [OS=Homo sapiens]	0	FALSE	560.775	76	30	1441	28	334	36.6	6.05	4603.84	30	115.1	103.1	101.6	100	99.6	94.8	88.9	97.1	99.7	2746907300	2461226619	2425158168	2386444244	2376196435	2262242678	2121733934	2316810821	2379630286	2047991624	2226339834	2315358018	1806045197	1596754391	1982776747	1502617139	1486235699	2379630286	40	40	40	42	40	38	39	39
High	P50991	T-complex protein 1 subunit delta [OS=Homo sapiens]	0	FALSE	560.169	69	29	552	28	539	57.9	7.83	2136.04	29	111.6	109.1	110.4	78	79	80.9	109.2	112	109.8	1079502263	1055622789	1068030887	7.54567e+08	7.64107e+08	7.81966e+08	1055689944	1083025711	1061992643	8.04837e+08	9.5488e+08	1019675298	5.71051e+08	5.13464e+08	6.85366e+08	7.47642e+08	6.94762e+08	1061992643	35	33	35	36	27	35	32	32
High	P68366	Tubulin alpha-4A chain [OS=Homo sapiens]	0	FALSE	555.981	77	31	1454	11	448	49.9	5.06	4952.07	31	91	85.8	75	90.4	97.3	94.7	143.1	121.2	101.6	5.48216e+08	5.16934e+08	4.51886e+08	5.4471e+08	5.86248e+08	5.7084e+08	8.62202e+08	7.30711e+08	6.12103e+08	4.08729e+08	4.67601e+08	4.31426e+08	4.12233e+08	3.93946e+08	5.00322e+08	6.10613e+08	4.68751e+08	6.12103e+08	10	9	10	11	11	10	8	10
High	P08727	Keratin, type I cytoskeletal 19 [OS=Homo sapiens]	0	FALSE	552.612	85	36	1425	1	400	44.1	5.14	5481.55	36	62.3	66.7	71.5	101.2	94.7	82	157.2	136.1	128.4	1.45878e+07	1.56132e+07	1.67529e+07	2.37056e+07	2.21844e+07	1.91967e+07	3.68172e+07	3.18848e+07	30079959	10876100	14123113	15994412	17940248	1.49074e+07	1.68253e+07	26074014	2.04542e+07	30079959	1	1	1	1	1	1	1	1
High	P61978	Heterogeneous nuclear ribonucleoprotein K [OS=Homo sapiens]	0	FALSE	551.203	66	30	969	2	463	50.9	5.54	3144.13	30	94.8	85	76.5	114.6	115.4	105.2	148.7	83.3	76.4	4.17418e+07	3.74528e+07	3.37108e+07	5.04782e+07	5.08422e+07	4.63335e+07	6.55143e+07	3.67031e+07	3.3641e+07	3.11211e+07	3.38785e+07	3.21845e+07	3.82016e+07	3.41649e+07	4.06097e+07	4.63974e+07	2.35451e+07	3.3641e+07	3	4	4	6	5	5	3	5
High	P41250	Glycine--tRNA ligase [OS=Homo sapiens]	0	FALSE	551.177	58	35	406	35	739	83.1	7.03	1449.66	35	98.4	84.7	98.1	99.3	89.2	98.4	95.8	109.9	126.3	4.94545e+08	426050990	4.92964e+08	499482169	4.48369e+08	494616783	4.8163e+08	5.52378e+08	6.34742e+08	3.68714e+08	3.85391e+08	4.70644e+08	3.78005e+08	3.01295e+08	4.33514e+08	341091548	3.54351e+08	6.34742e+08	35	34	36	36	35	34	33	36
High	P04844-1	Dolichyl-diphosphooligosaccharide--protein glycosyltransferase subunit 2 [OS=Homo sapiens]	0	FALSE	543.655	62	25	386	25	631	69.2	5.69	1444.98	25	89.9	87.2	87	145.6	138	96.1	99.2	82.6	74.4	2.1635e+08	210051125	209504509	3.5044e+08	3.32251e+08	2.3139e+08	2.38919e+08	1.98883e+08	1.79033e+08	1.61303e+08	1.90005e+08	2.00019e+08	2.65211e+08	2.23266e+08	2.02805e+08	1.69203e+08	1.27584e+08	1.79033e+08	27	28	28	25	25	25	26	24
High	Q15029	116 kDa U5 small nuclear ribonucleoprotein component [OS=Homo sapiens]	0	FALSE	543.409	72	49	339	48	972	109.4	5	1144.69	49	109	88.1	93	78.6	72	68.1	137.1	134.9	119.2	3.58535e+08	2.89653e+08	3.05896e+08	2.58444e+08	2.36946e+08	224067217	4.51026e+08	443894613	3.91987e+08	2.6731e+08	262010163	2.92046e+08	1.95589e+08	1.59223e+08	1.96387e+08	3.19418e+08	2.84759e+08	3.91987e+08	42	44	47	42	39	42	46	42
High	P30101	Protein disulfide-isomerase A3 [OS=Homo sapiens]	0	FALSE	542.183	74	38	493	38	505	56.7	6.35	1794.19	38	78.3	80.2	80.4	159	152.9	150.1	69.5	66.8	62.8	1643875526	1684003789	1689496927	3338836256	3211018367	3152447397	1459905042	1402774342	1318768491	1225612276	1523291146	1613004177	2526809164	2157737298	2763010112	1033908306	8.99881e+08	1318768491	43	41	40	42	39	44	41	38
High	P78371-1	T-complex protein 1 subunit beta [OS=Homo sapiens]	0	FALSE	538.944	75	38	558	38	535	57.5	6.46	2029.98	38	104.2	122.4	121.4	73.5	73	83.8	102.2	101	118.4	1330622748	1563252785	1550182223	9.38269e+08	9.31527e+08	1070133852	1305020902	1289892662	1511104159	9.92063e+08	1414063996	1479997011	7.10076e+08	6.25967e+08	9.37935e+08	9.24219e+08	8.27467e+08	1511104159	42	43	43	42	42	43	43	42
High	P41252	isoleucine--tRNA ligase, cytoplasmic [OS=Homo sapiens]	0	FALSE	537.38	57	55	428	55	1262	144.4	6.15	1443.77	55	103.9	98.3	95.5	103.6	103.9	109.5	90.7	98	96.5	5.39009e+08	5.09694e+08	4.95322e+08	5.37315e+08	5.39081e+08	5.67791e+08	4.70581e+08	508474972	5.00478e+08	4.01865e+08	4.61051e+08	4.72896e+08	4.06637e+08	3.62251e+08	4.97649e+08	3.33267e+08	3.26187e+08	5.00478e+08	50	51	53	52	49	52	49	45
High	P08727	SWISS-PROT:P08727 Tax_Id=9606 Gene_Symbol=KRT19 Keratin, type I cytoskeletal 19	0	TRUE	536.414	85	36	1406	1	400	44.1	5.14	5386.99	36	162.7	172.4	169.1	120.6	133.9	116.8	8.8		15.8	1.9174e+07	2.03152e+07	1.99281e+07	1.4209e+07	1.5778e+07	1.37623e+07	1.03729e+06		1.85717e+06	1.42954e+07	18376413	19025870	1.07532e+07	10602509	12062187	734615		1.85717e+06	1	1	1	1	1	1	1
High	P22102-1	trifunctional purine biosynthetic protein adenosine-3 [OS=Homo sapiens]	0	FALSE	534.834	56	36	366	36	1010	107.7	6.7	1376.54	36	126.9	111.9	115.1	74.2	77.3	73.7	104.1	115	101.8	673581331	5.942e+08	6.11434e+08	3.93953e+08	4.10471e+08	3.91339e+08	5.52934e+08	6.1066e+08	5.40333e+08	5.02197e+08	5.37492e+08	5.83751e+08	2.98141e+08	2.75828e+08	3.42995e+08	3.91589e+08	3.91739e+08	5.40333e+08	42	41	41	40	35	37	41	40
High	P00558	phosphoglycerate kinase 1 [OS=Homo sapiens]	0	FALSE	532.117	84	32	582	32	417	44.6	8.1	2076.94	32	73.2	83	94.2	118.6	105.4	124.3	99.5	84.6	117.2	1735218453	1967156191	2231243953	2810470662	2496863265	2945218375	2358844443	2005796780	2776354888	1293714155	1779420942	2130223358	2126945581	1677839981	2581381107	1670539379	1286719982	2776354888	39	43	42	42	42	42	41	41
High	Q15393-1	Splicing factor 3B subunit 3 [OS=Homo sapiens]	0	FALSE	526.657	48	41	405	41	1217	135.5	5.26	1336.93	41	95.3	86.5	87.7	68.3	68.4	59.3	149.8	152	132.6	3.53542e+08	3.20857e+08	3.25256e+08	2.53238e+08	2.53762e+08	2.19944e+08	5.55411e+08	5.63837e+08	4.91833e+08	2.63588e+08	2.90236e+08	3.1053e+08	1.91649e+08	170522958	1.92773e+08	3.93343e+08	3.61702e+08	4.91833e+08	39	42	42	38	33	39	40	40
High	Q14839	Chromodomain-helicase-DNA-binding protein 4 [OS=Homo sapiens]	0	FALSE	526.496	43	55	259	37	1912	217.9	5.86	961.7	55	78.8	103.5	95.7	74.2	60.6	87.2	132.6	105	162.5	9.47083e+07	1.24272e+08	1.14912e+08	8.90672e+07	7.28216e+07	1.0476e+08	1.59239e+08	1.26068e+08	1.95165e+08	7.0611e+07	1.12412e+08	1.09709e+08	6.74055e+07	4.89346e+07	9.18188e+07	1.12773e+08	8.08728e+07	1.95165e+08	32	35	33	30	26	33	32	27
High	Q13263	Transcription intermediary factor 1-beta [OS=Homo sapiens]	0	FALSE	526.444	56	26	322	26	835	88.5	5.77	1244.81	26	73.2	102.5	95.2	72.5	59.6	77.8	144.7	118.9	155.7	3.48201e+08	4.87748e+08	4.53269e+08	3.44918e+08	2.83611e+08	3.7038e+08	6.88842e+08	5.66026e+08	7.41071e+08	2.59605e+08	4.412e+08	4.32747e+08	2.61031e+08	1.90581e+08	324625252	4.8784e+08	3.63106e+08	7.41071e+08	28	32	34	29	23	30	33	31
High	P35221	Catenin alpha-1 [OS=Homo sapiens]	0	FALSE	525.954	62	39	262	33	906	100	6.29	1054.88	39	75.8	75.7	78.3	155.5	139.2	150.3	82	72.5	70.8	2.04674e+08	2.04276e+08	211275942	4.19818e+08	3.75889e+08	4.05795e+08	2.21337e+08	1.95702e+08	1.9124e+08	1.52597e+08	1.84781e+08	2.0171e+08	3.17716e+08	2.5259e+08	3.55665e+08	1.56752e+08	1.25543e+08	1.9124e+08	30	32	33	32	30	33	31	27
High	Q9NZM1-6	Isoform 6 of Myoferlin [OS=Homo sapiens]	0	FALSE	525.912	52	71	276	71	2048	233.3	6.21	859.17	71	146.3	156.7	161.1	36.5	38.8	41.6	86.7	110.5	121.7	3.01371e+08	3.2266e+08	3.31779e+08	7.51868e+07	7.99643e+07	8.57741e+07	1.78636e+08	2.27697e+08	2.50668e+08	2.24691e+08	2.91867e+08	3.16757e+08	5.69008e+07	5.37344e+07	7.5178e+07	1.2651e+08	1.46068e+08	2.50668e+08	59	60	63	43	38	45	55	53
High	P49792	E3 SUMO-protein ligase RanBP2 [OS=Homo sapiens]	0	FALSE	520.562	31	65	305	48	3224	358	6.2	906.45	65	90.4	100	105	96.9	103.4	107.1	102.7	94.5	100	1.24142e+08	1.37278e+08	1.44107e+08	1.33078e+08	1.41998e+08	1.46979e+08	1.40988e+08	1.2978e+08	1.37256e+08	9.25555e+07	1.24177e+08	1.37583e+08	1.00713e+08	9.542e+07	1.28822e+08	9.98478e+07	8.32537e+07	1.37256e+08	38	44	43	35	34	38	36	38
High	Q13200	26S proteasome non-ATPase regulatory subunit 2 [OS=Homo sapiens]	0	FALSE	520.213	65	42	404	42	908	100.1	5.2	1521.48	42	128.1	127.8	127.7	80.4	73.7	74.6	86.8	99.7	101.2	3.96188e+08	3.95428e+08	3.95093e+08	2.48556e+08	2.27802e+08	2.30855e+08	2.68329e+08	3.08271e+08	3.131e+08	2.95383e+08	3.5769e+08	3.77205e+08	1.88105e+08	1.53078e+08	2.02337e+08	1.90031e+08	1.97756e+08	3.131e+08	42	43	43	39	38	42	37	41
High	O75533-1	splicing factor 3B subunit 1 [OS=Homo sapiens]	0	FALSE	518.399	52	50	410	50	1304	145.7	7.09	1470.89	50	110.2	115.7	112.5	79.7	70.6	72.9	104.5	115.8	118.2	3.53808e+08	3.71509e+08	361259919	2.55966e+08	2.26764e+08	2.34171e+08	3.35515e+08	3.71735e+08	379506218	2.63786e+08	3.36054e+08	3.44904e+08	193713262	152380443	205242942	2.37613e+08	2.38468e+08	379506218	43	46	45	41	39	46	40	41
High	P02545	Prelamin-A/C [OS=Homo sapiens]	0	FALSE	518.299	66	48	583	5	664	74.1	7.02	1941.97	48	114.9	111.3	108.5	132.9	160.4	149.7	48.2	37.4	36.7	1.02133e+08	9.88578e+07	9.64356e+07	118111038	1.42507e+08	1.33042e+08	4.28155e+07	3.32004e+07	3.26329e+07	7.61463e+07	8.94233e+07	9.20694e+07	8.93857e+07	95761420	116606387	3.0322e+07	2.12981e+07	3.26329e+07	4	4	3	4	3	3	3	3
High	P60842	Eukaryotic initiation factor 4A-I [OS=Homo sapiens]	0	FALSE	512.194	85	33	757	20	406	46.1	5.48	2669.02	33	75	100	94.7	72	63.3	91.4	124.5	105	174.1	3.66557e+08	4.88961e+08	4.63166e+08	351806795	3.0926e+08	4.47067e+08	6.08738e+08	513076132	8.51243e+08	273291344	4.42297e+08	4.42195e+08	2.66245e+08	2.07816e+08	3.91839e+08	4.3111e+08	3.29139e+08	8.51243e+08	24	27	24	23	23	26	26	25
High	P35222	Catenin beta-1 [OS=Homo sapiens]	0	FALSE	511.768	67	34	341	30	781	85.4	5.86	1190.88	34	63.6	65.9	62	55.1	47.3	52.3	183.3	188.7	181.8	2.09445e+08	2.17034e+08	2.04268e+08	1.81344e+08	1.55788e+08	1.72091e+08	603542687	6.21362e+08	598579233	1.56155e+08	1.96321e+08	1.9502e+08	1.3724e+08	1.04686e+08	1.50832e+08	4.2743e+08	3.98604e+08	598579233	30	30	33	27	25	31	30	33
High	P12268	inosine-5'-monophosphate dehydrogenase 2 [OS=Homo sapiens]	0	FALSE	510.868	74	29	483	29	514	55.8	6.9	1790.26	29	145.7	140.7	142.5	52.6	55	58.5	104.3	97.1	103.6	8.14232e+08	7.86264e+08	7.96713e+08	2.94018e+08	3.07412e+08	3.26954e+08	5.82988e+08	5.42998e+08	5.7881e+08	6.07061e+08	711227231	760641383	222510763	2.06575e+08	2.86564e+08	412873481	3.48334e+08	5.7881e+08	34	32	31	32	29	31	33	33
High	P31939	bifunctional purine biosynthesis protein purH [OS=Homo sapiens]	0	FALSE	509.414	72	36	452	36	592	64.6	6.71	1737.91	36	77.4	74.6	74.9	124.1	121.7	116.7	106.8	107.4	96.4	6.11768e+08	5.90151e+08	5.92461e+08	9.81413e+08	961931251	9.22351e+08	8.44144e+08	8.48967e+08	7.62039e+08	4.56112e+08	5.3383e+08	5.65637e+08	742726634	646397716	8.08408e+08	5.97825e+08	5.44613e+08	7.62039e+08	40	38	38	39	37	37	36	37
High	P07237	Protein disulfide-isomerase [OS=Homo sapiens]	0	FALSE	509.379	79	38	626	38	508	57.1	4.87	2135.07	38	111.2	123.6	122.8	110.5	108.2	109.8	75.6	71.7	66.6	1999320144	2222159207	2208104557	1986656883	1944903787	1973085079	1357974384	1288195590	1196368680	1490618525	2010087784	2108131609	1503488770	1306934737	1729340204	9.61721e+08	8.26378e+08	1196368680	44	43	42	41	40	42	37	40
High	P52272	Heterogeneous nuclear ribonucleoprotein M [OS=Homo sapiens]	0	FALSE	508.376	64	39	468	39	730	77.5	8.7	1689.01	39	84.7	101.3	112.8	66.1	63.6	78.8	98.1	98.4	196.1	8.30129e+08	9.92963e+08	1105426714	647382614	6.23714e+08	7.72564e+08	9.61469e+08	964455935	1921920877	6.18913e+08	8.98199e+08	1055378012	4.89935e+08	4.19123e+08	6.77125e+08	6.80914e+08	6.18699e+08	1921920877	46	47	48	41	40	49	45	43
High	P13667	Protein disulfide-isomerase A4 [OS=Homo sapiens]	0	FALSE	499.772	64	46	392	46	645	72.9	5.07	1322.27	46	83.4	85.8	91.1	132.2	130	138	77.9	76.6	84.9	7.23533e+08	7.44713e+08	7.90232e+08	1146485067	1127859668	1197598646	6.75832e+08	6.64802e+08	7.36942e+08	5.39439e+08	673641678	7.54454e+08	8.67652e+08	7.57898e+08	1049653412	4.78626e+08	4.26471e+08	7.36942e+08	42	43	44	42	44	45	41	38
High	O60716-1	Catenin delta-1 [OS=Homo sapiens]	0	FALSE	498.73	53	41	306	41	968	108.1	6.23	1046.74	41	81.5	85.2	81.8	151.1	148.9	150.2	73.7	64.1	63.5	2.08629e+08	2.18035e+08	2.09529e+08	387002645	381355405	3.84485e+08	1.88597e+08	164256354	1.62587e+08	1.55546e+08	197226692	2.00042e+08	2.92881e+08	2.56263e+08	336987776	1.33565e+08	1.05371e+08	1.62587e+08	37	40	39	38	38	38	38	35
High	P56192	Methionine--tRNA ligase, cytoplasmic [OS=Homo sapiens]	0	FALSE	492.204	57	36	307	36	900	101.1	6.16	1147.89	36	83.2	71.8	69.2	111.3	111.2	109.5	128	115	100.9	2.42688e+08	2.09284e+08	2.01976e+08	3.2461e+08	3.24469e+08	3.19325e+08	3.73279e+08	3.35315e+08	2.94197e+08	1.80939e+08	1.89311e+08	1.92832e+08	2.45663e+08	2.18037e+08	279877102	2.64357e+08	2.15105e+08	2.94197e+08	33	36	35	37	35	38	35	36
High	P16144-2	Isoform Beta-4A of Integrin beta-4 [OS=Homo sapiens]	0	FALSE	490.72	46	51	323	51	1752	194.9	6.1	1123.14	51	100.8	95.7	104.1	109.9	125	120.8	84.5	77.9	81.3	267588449	2.54028e+08	276509530	2.91905e+08	3.31878e+08	3.20934e+08	224316366	2.06996e+08	2.15998e+08	1.99504e+08	2.29785e+08	263990434	2.20912e+08	2.23015e+08	281287196	1.58861e+08	1.32788e+08	2.15998e+08	48	50	52	46	45	48	41	38
High	P31948	stress-induced-phosphoprotein 1 [OS=Homo sapiens]	0	FALSE	490.028	69	43	437	43	543	62.6	6.8	1389.16	43	104.7	111	127.3	89.5	100.4	97	73.4	92.3	104.5	7.75974e+08	8.22033e+08	9.42767e+08	6.62811e+08	7.43962e+08	7.18333e+08	5.43752e+08	6.83827e+08	7.74158e+08	5.78537e+08	743582435	9.00083e+08	5.01611e+08	4.99927e+08	6.29594e+08	3.85086e+08	4.38675e+08	7.74158e+08	42	42	43	42	37	44	39	36
High	P17987	T-complex protein 1 subunit alpha [OS=Homo sapiens]	0	FALSE	488.124	80	35	1026	35	556	60.3	6.11	3043.66	35	116.9	105.5	109.2	74.4	77.3	74.1	106.2	124.4	111.9	1312626764	1184515255	1226564637	8.35595e+08	8.68197e+08	8.32231e+08	1192526749	1396633680	1255966855	9.78646e+08	1071471224	1171031360	6.32373e+08	5.8341e+08	7.29421e+08	844550348	8.95941e+08	1255966855	39	42	41	38	38	38	41	38
High	P27824	Calnexin [OS=Homo sapiens]	0	FALSE	487.973	57	31	418	31	592	67.5	4.6	1584.29	31	92.4	115.1	95.8	100.1	98.6	109.3	103	87.8	97.9	6.27947e+08	7.82535e+08	6.50969e+08	6.80695e+08	6.70155e+08	7.4307e+08	7.00214e+08	5.96528e+08	6.6513e+08	4.68174e+08	7.07854e+08	6.21496e+08	5.15146e+08	4.5033e+08	6.51275e+08	4.95893e+08	3.82673e+08	6.6513e+08	30	32	33	31	27	32	30	30
High	Q05639	Elongation factor 1-alpha 2 [OS=Homo sapiens]	0	FALSE	487.741	73	25	1307	12	463	50.4	9.03	5067.82	25	135.9	88.2	81.6	95.9	129.6	57	157.3	131.5	23	6.41022e+08	4.15901e+08	3.84757e+08	4.52193e+08	6.1112e+08	2.69002e+08	7.42069e+08	6.20026e+08	1.08668e+08	4.77922e+08	3.76209e+08	3.67337e+08	3.42217e+08	410659676	2.35771e+08	5.25535e+08	397746881	1.08668e+08	17	17	19	9	7	7	15	14
High	P15924-1	Desmoplakin [OS=Homo sapiens]	0	FALSE	486.03	32	66	277	66	2871	331.6	6.81	966.25	66	117.5	97.2	104	63.4	72.2	66.8	128.6	124.6	125.6	2.27929e+08	1.88427e+08	2.01739e+08	1.22979e+08	1.40017e+08	1.29596e+08	2.49283e+08	2.41647e+08	2.43515e+08	1.69935e+08	1.70444e+08	1.92605e+08	9.30695e+07	9.40884e+07	1.13586e+08	1.76542e+08	1.55017e+08	2.43515e+08	57	56	57	48	48	55	56	51
High	P06737-1	Glycogen phosphorylase, liver form [OS=Homo sapiens]	0	FALSE	480.197	64	42	347	36	847	97.1	7.17	1180.1	42	167.8	158.3	154.5	42.4	40.8	37.4	101.7	93.4	103.8	3.783e+08	3.56744e+08	3.48392e+08	9.55578e+07	9.19437e+07	8.44001e+07	229186577	2.10442e+08	2.3389e+08	2.82046e+08	3.22699e+08	3.32618e+08	7.23175e+07	6.17842e+07	7.39737e+07	162310492	134998790	2.3389e+08	37	38	37	28	26	29	34	29
High	P02769 sp	SWISS-PROT:P02769 (Bos taurus) Bovine serum albumin precursor	0	TRUE	477.793	68	42	423	42	607	69.2	6.18	1437.94	42	52.4	73.6	110.1	81.7	192.2	55.3	48.3	109.7	176.7	6.23661e+08	876463585	1309682105	9.72269e+08	2287341965	6.57556e+08	5.74644e+08	1305682812	2103251299	4.64978e+08	7.92818e+08	1250385646	7.35807e+08	1537046042	5.76325e+08	4.06964e+08	8.37596e+08	2103251299	37	37	42	39	44	38	39	41
High	Q9Y5B9	FACT complex subunit SPT16 [OS=Homo sapiens]	0	FALSE	477.018	52	44	258	44	1047	119.8	5.66	917.56	44	112.3	110.6	133.7	56.9	62.6	64.2	119.5	125.9	114.1	2.96309e+08	2.91713e+08	3.52792e+08	1.50189e+08	1.65257e+08	1.69419e+08	3.15348e+08	3.32151e+08	3.00883e+08	2.20917e+08	2.63873e+08	3.3682e+08	1.13662e+08	1.11049e+08	148489420	2.23331e+08	2.13075e+08	3.00883e+08	41	43	45	34	36	38	40	39
High	Q99832	T-complex protein 1 subunit eta [OS=Homo sapiens]	0	FALSE	472.708	75	34	515	34	543	59.3	7.65	1792.07	34	103.5	104.9	115.7	79.1	82.4	80.1	115.9	111.3	107.1	9.42191e+08	954626188	1052513151	7.19416e+08	7.4991e+08	7.2866e+08	1054882139	1012918712	9.74194e+08	7.02463e+08	8.63522e+08	1004860134	5.44449e+08	5.03924e+08	6.38645e+08	7.4707e+08	6.49788e+08	9.74194e+08	36	36	35	35	36	36	35	34
High	P53396-1	ATP-citrate synthase [OS=Homo sapiens]	0	FALSE	472.029	61	48	420	48	1101	120.8	7.33	1421.95	48	116.3	123.1	118.4	111.8	113.5	115.2	63.4	67.3	71	7.13114e+08	7.55112e+08	7.26492e+08	6.85983e+08	6.96176e+08	7.06304e+08	3.88726e+08	4.1272e+08	4.35382e+08	5.31671e+08	6.83048e+08	6.93599e+08	5.19148e+08	4.67816e+08	6.19051e+08	2.75297e+08	2.6476e+08	4.35382e+08	46	48	47	49	44	50	43	43
High	Q13509	tubulin beta-3 chain [OS=Homo sapiens]	0	FALSE	470.357	80	29	698	10	450	50.4	4.93	2153.59	29	118.7	152.3	186.6	7.2	10.4	7.3	132.8	118.6	166.1	8.47094e+07	108752771	1.33179e+08	5.13417e+06	7.42151e+06	5.23188e+06	9.4792e+07	8.46498e+07	1.18583e+08	6.31561e+07	98373967	1.27149e+08	3.8855e+06	4.9871e+06	4.58556e+06	67131915	5.43029e+07	1.18583e+08	6	7	8	4	4	4	8	6
High	Q9NR30-1	Nucleolar RNA helicase 2 [OS=Homo sapiens]	0	FALSE	470.326	55	38	327	36	783	87.3	9.28	1159.94	38	80.9	56.2	67.1	58.6	75.1	83.9	169	164.5	144.8	3.30296e+08	2.29704e+08	2.73966e+08	2.39351e+08	3.06597e+08	3.42481e+08	690227655	6.71606e+08	5.91324e+08	2.46257e+08	2.07782e+08	2.61562e+08	181139082	206026459	3.00173e+08	4.88821e+08	4.30835e+08	5.91324e+08	37	35	34	32	35	36	36	35
High	P26599	Polypyrimidine tract-binding protein 1 [OS=Homo sapiens]	0	FALSE	469.57	64	23	367	23	531	57.2	9.17	1475.76	23	107.7	101.2	104.8	86.4	80.2	88.3	110.8	112.2	108.4	5.88812e+08	5.53354e+08	5.73415e+08	4.72476e+08	438663766	4.83045e+08	6.0585e+08	6.13831e+08	5.93113e+08	4.38996e+08	5.00544e+08	5.47453e+08	3.57567e+08	2.94773e+08	4.23372e+08	4.29065e+08	3.93773e+08	5.93113e+08	28	31	31	28	28	31	30	28
High	Q92621	Nuclear pore complex protein Nup205 [OS=Homo sapiens]	0	FALSE	468.444	33	38	249	38	2012	227.8	6.19	819.43	38	99.3	87	78.6	95.5	94.9	97.3	106	129.2	112.1	6.58919e+07	5.77703e+07	5.22004e+07	6.3366e+07	6.29751e+07	6.45772e+07	7.03839e+07	8.57623e+07	7.44111e+07	4.91265e+07	5.2257e+07	4.9837e+07	4.7955e+07	4.23179e+07	5.65996e+07	4.98461e+07	5.50166e+07	7.44111e+07	34	35	34	31	30	37	33	36
High	P45974-2	Isoform Short of Ubiquitin carboxyl-terminal hydrolase 5 [OS=Homo sapiens]	0	FALSE	466.779	57	31	280	29	835	93.2	5.08	1017.95	31	91.8	102	93.6	82	82.5	83	148.9	107.6	108.6	2.17952e+08	2.42093e+08	2.22007e+08	1.94614e+08	1.95779e+08	1.9695e+08	3.53436e+08	2.55229e+08	2.57622e+08	1.62497e+08	2.18989e+08	2.11955e+08	1.47282e+08	1.3156e+08	1.7262e+08	2.50304e+08	1.63729e+08	2.57622e+08	29	30	30	30	29	31	32	28
High	P40227-1	T-complex protein 1 subunit zeta [OS=Homo sapiens]	0	FALSE	465.489	70	32	531	27	531	58	6.68	2213.76	32	109.9	103.4	116.3	75.6	74.8	78.8	94.2	110.9	136	5.01029e+08	4.71447e+08	530043795	3.44438e+08	3.41099e+08	3.58922e+08	4.2932e+08	5.05502e+08	6.19788e+08	3.73549e+08	4.26455e+08	5.06046e+08	260668062	2.29212e+08	314582531	3.04045e+08	3.2428e+08	6.19788e+08	25	27	27	25	26	24	24	22
High	P02545-2	Isoform C of Prelamin-A/C [OS=Homo sapiens]	0	FALSE	464.8	64	44	534	1	572	65.1	6.84	1755.83	44	40.6	94.4	91.5	118.4	125.8	164.8	124.5	48.5	91.6	2.20123e+06	5.11963e+06	4.96367e+06	6.41985e+06	6.8235e+06	8.93714e+06	6.75056e+06	2.63112e+06	4.97042e+06	1.64116e+06	4.63104e+06	4.73894e+06	4.8585e+06	4.58525e+06	7.8331e+06	4780763	1.68787e+06	4.97042e+06	1	1	1	1	1	1	1	1
High	P43243	Matrin-3 [OS=Homo sapiens]	0	FALSE	464.351	46	31	369	31	847	94.6	6.25	1436.67	31	70.5	86.6	85.8	86.2	92	94.6	142.1	115.6	126.6	3.9657e+08	4.86906e+08	4.825e+08	4.84602e+08	5.17253e+08	5.32006e+08	7.98759e+08	6.49978e+08	7.11917e+08	2.95667e+08	4.40439e+08	460654182	3.66744e+08	3.47583e+08	4.66284e+08	5.65683e+08	416961389	7.11917e+08	32	34	35	33	32	33	32	31
High	P19338	Nucleolin [OS=Homo sapiens]	0	FALSE	462.652	38	37	626	37	710	76.6	4.7	2217.24	37	106.5	94.1	96.7	75.8	89.8	84	131.3	124.5	97.3	2845913823	2512318443	2583695267	2023436667	2398019879	2244940884	3508296922	3324484640	2599271701	2121807194	2272555718	2466717277	1531323467	1611419289	1967612328	2484584425	2132659131	2599271701	41	43	43	39	41	41	43	42
High	Q9UQ80	proliferation-associated protein 2G4 [OS=Homo sapiens]	0	FALSE	459.472	76	30	613	30	394	43.8	6.55	2553.06	30	92.3	100.4	98.6	72.5	68.4	77.1	124.4	117.6	148.7	7.70954e+08	8.38924e+08	8.23509e+08	6.06084e+08	5.71109e+08	643831002	1039396711	9.82302e+08	1242656240	5.74795e+08	758861063	7.86224e+08	458680121	3.83773e+08	5.64295e+08	7.36103e+08	6.30148e+08	1242656240	32	32	33	30	29	30	31	30
High	Q15181	Inorganic pyrophosphatase [OS=Homo sapiens]	0	FALSE	456.308	82	27	338	26	289	32.6	5.86	1270.38	27	64	69	65.2	130.3	123.5	126.7	118.6	101.4	101.4	4.46927e+08	4.81936e+08	4.5535e+08	9.10391e+08	8.62934e+08	885315087	8.28301e+08	7.08397e+08	708352425	3.33212e+08	4.35943e+08	434733993	688977745	5.79873e+08	775947773	5.86605e+08	4.54437e+08	708352425	29	31	32	32	32	32	30	28
High	P31946	14-3-3 protein beta/alpha [OS=Homo sapiens]	0	FALSE	455.632	66	19	623	1	246	28.1	4.83	2185.17	19	38.7	118.6	130.8	72.6	34.4	172.8	46.9	26.7	258.5	3.81171e+06	1.16953e+07	1.28939e+07	7.16018e+06	3.39216e+06	1.70341e+07	4.62174e+06	2.63123e+06	25486050	2.84187e+06	1.05792e+07	1.23101e+07	5.41878e+06	2.27946e+06	1.49298e+07	3.27313e+06	1.68793e+06	25486050	2	2	2	2	1	2	2	1
High	P15311	Ezrin [OS=Homo sapiens]	0	FALSE	453.659	58	41	714	32	586	69.4	6.27	2174.4	41	204.5	187.5	212.3	42.1	47.6	42.9	52.1	56.2	54.8	2322646455	2129181744	2411176444	4.7852e+08	5.41052e+08	4.87219e+08	5.91254e+08	6.38886e+08	6.22534e+08	1731678563	1925983611	2302009323	3.62141e+08	3.63576e+08	4.2703e+08	4.18728e+08	4.09846e+08	6.22534e+08	31	32	33	30	29	28	31	29
High	P12277	Creatine kinase B-type [OS=Homo sapiens]	0	FALSE	450.126	67	20	266	20	381	42.6	5.59	977.49	20	171	214.6	226.5	91.5	82.8	93.7	5.5	5	9.4	8.2059e+08	1029910657	1086985349	4.3905e+08	3.97473e+08	4.49526e+08	2.65772e+07	2.42044e+07	4.52069e+07	611801138	9.31621e+08	1037771588	3.3227e+08	2.67093e+08	3.93994e+08	1.88221e+07	1.55271e+07	4.52069e+07	22	22	22	19	18	19	10	7
High	P31946-2	Isoform Short of 14-3-3 protein beta/alpha [OS=Homo sapiens]	0	FALSE	449.357	66	19	621	1	244	27.8	4.83	2175.71	19	44.4	96.8	105.8	87.3	41.4	159.8	62.9	41.8	259.8	1.61631e+07	3.52036e+07	3.84918e+07	3.17596e+07	1.50513e+07	5.8153e+07	2.28893e+07	1.52e+07	94512768	12050573	31843950	36749104	24035462	10114131	50969068	16210280	9750820	94512768	1	1	1	1	1	1	1	1
High	Q9H4A4	aminopeptidase B [OS=Homo sapiens]	0	FALSE	448.96	78	36	240	36	650	72.5	5.74	800.29	36	66.1	74.3	55.3	213.4	211.5	186	28.4	33.1	31.9	1.36699e+08	1.53664e+08	1.14333e+08	4.41342e+08	4.37557e+08	3.84813e+08	5.87394e+07	6.83976e+07	6.60075e+07	1.01917e+08	1.38999e+08	1.09156e+08	3.34005e+08	2.94029e+08	3.37276e+08	41599411	4.38771e+07	6.60075e+07	34	35	33	37	37	38	24	28
High	Q92945	Far upstream element-binding protein 2 [OS=Homo sapiens]	0	FALSE	447.586	49	30	272	28	711	73.1	7.3	986.98	30	127.7	138	129.3	54.5	54.9	58.1	106.8	104.1	126.5	4.97326e+08	5.37419e+08	5.03686e+08	2.12462e+08	2.14013e+08	2.26479e+08	4.15834e+08	4.05428e+08	4.92729e+08	3.70788e+08	4.8613e+08	4.80881e+08	1.6079e+08	143811960	1.98501e+08	2.94495e+08	2.60082e+08	4.92729e+08	29	32	28	27	26	29	32	29
High	P34897-1	Serine hydroxymethyltransferase, mitochondrial [OS=Homo sapiens]	0	FALSE	447.524	67	28	325	27	504	56	8.53	1290.23	28	78.5	78.1	79.3	78.8	69.3	75.7	127.8	151	161.5	8.65488e+08	8.61007e+08	8.73894e+08	8.68922e+08	7.63409e+08	8.34715e+08	1409017905	1664912530	1780041199	6.45276e+08	7.78837e+08	8.34328e+08	6.57594e+08	5.12995e+08	7.31598e+08	9.9787e+08	1068042507	1780041199	29	32	30	29	30	33	33	29
High	P11586	C-1-tetrahydrofolate synthase, cytoplasmic [OS=Homo sapiens]	0	FALSE	447.184	62	43	340	43	935	101.5	7.3	1169.6	43	100.5	102.2	101.9	80.9	83.9	78.7	117.1	123.8	111.1	6.46967e+08	6.57385e+08	6.55511e+08	5.20359e+08	5.39922e+08	5.0658e+08	7.5326e+08	7.96729e+08	7.14711e+08	4.82354e+08	5.94648e+08	6.25833e+08	3.93804e+08	362816445	4.44e+08	5.3346e+08	5.11102e+08	7.14711e+08	39	41	42	38	38	42	42	42
High	P09651-2	Isoform A1-A of Heterogeneous nuclear ribonucleoprotein A1 [OS=Homo sapiens]	0	FALSE	445.775	74	24	433	22	320	34.2	9.23	1630.75	24	72.3	93.5	88.4	67.9	68.7	76.1	158.9	129.3	144.9	8.77116e+08	1133417808	1071705251	8.23788e+08	8.32724e+08	9.23415e+08	1927474823	1567687925	1757860307	6.53945e+08	1025250253	1023183303	6.23437e+08	5.59573e+08	809340970	1365042364	1005672857	1757860307	27	26	27	25	23	26	26	26
High	P08670	Vimentin [OS=Homo sapiens]	0	FALSE	445.281	74	36	165	36	466	53.6	5.12	562.82	36	1.8	1.2	1.3	2.4	1.8	2.1	221.6	290	377.9	7.43237e+06	4.97106e+06	5.58109e+06	9.79537e+06	7.51918e+06	8.54242e+06	9.23311e+08	1208187431	1574481077	5.5413e+06	4.49664e+06	5.32841e+06	7.41307e+06	5.05273e+06	7.48713e+06	6.53891e+08	775053049	1574481077	4	4	5	3	3	3	41	38
High	P13796	Plastin-2 [OS=Homo sapiens]	0	FALSE	445.101	77	39	182	34	627	70.2	5.43	629.32	39	0.4	0.1	0.3	0.3	0.3	0.1	315.6	309.3	273.7	929540	248205	760114	786107	698623	293577	8.18502e+08	8.02205e+08	7.09772e+08	693030	224518	725700	594921	469460	257310	5.79665e+08	5.14615e+08	7.09772e+08	2	1	2	3	2	1	35	31
High	P52597	Heterogeneous nuclear ribonucleoprotein F [OS=Homo sapiens]	0	FALSE	442.99	66	17	452	15	415	45.6	5.58	1732.55	17	69.5	92.3	94	84.4	70.9	97.4	119.1	102.2	170.1	2.99183e+08	3.97457e+08	4.04806e+08	3.63445e+08	3.05384e+08	4.19122e+08	5.1277e+08	4.39865e+08	7.32418e+08	2.2306e+08	3.59526e+08	3.86478e+08	2.75053e+08	2.05212e+08	3.67346e+08	3.63145e+08	2.82174e+08	7.32418e+08	20	20	22	22	21	22	21	20
High	P27797	Calreticulin [OS=Homo sapiens]	0	FALSE	441.699	69	21	473	21	417	48.1	4.44	1833.72	21	88.3	115.9	110	106.3	113.9	86.3	112.7	96.2	70.4	4.95568e+08	6.50578e+08	6.17484e+08	5.96369e+08	6.39309e+08	4.8435e+08	6.32557e+08	5.39936e+08	3.95201e+08	3.69477e+08	5.8849e+08	5.89527e+08	4.51328e+08	4.29603e+08	4.24516e+08	4.47978e+08	3.46369e+08	3.95201e+08	24	29	28	25	22	29	23	23
High	Q14166	Tubulin--tyrosine ligase-like protein 12 [OS=Homo sapiens]	0	FALSE	441.664	80	32	242	32	644	74.4	5.53	980.64	32	99.5	116.4	100.4	69.5	67	63.7	138.9	122.3	122.3	1.96412e+08	2.29733e+08	198223137	1.37286e+08	1.32239e+08	1.25738e+08	2.74211e+08	2.41404e+08	2.41491e+08	1.46438e+08	2.07808e+08	1.89248e+08	1.03897e+08	8.88618e+07	1.10205e+08	1.94197e+08	1.54861e+08	2.41491e+08	32	35	36	31	27	30	30	29
High	P26639-1	Threonine--tRNA ligase, cytoplasmic [OS=Homo sapiens]	0	FALSE	439.944	54	36	310	33	723	83.4	6.67	1090.36	36	82	82.1	81.4	95.8	93.3	97.2	129.9	120.9	117.3	3.21632e+08	3.21833e+08	3.19275e+08	3.75522e+08	3.65759e+08	380968876	5.09397e+08	4.74126e+08	4.59647e+08	2.39797e+08	291118803	3.0482e+08	2.84192e+08	2.45782e+08	3.33906e+08	3.60756e+08	3.04152e+08	4.59647e+08	30	29	33	29	29	30	32	27
High	P50990	T-complex protein 1 subunit theta [OS=Homo sapiens]	0	FALSE	439.265	70	40	417	40	548	59.6	5.6	1430.19	40	112.1	117.6	124.8	71.6	72.3	76.6	104.3	107	113.7	1267040043	1328776561	1411175567	8.09477e+08	8.17214e+08	8.66239e+08	1178849254	1209014725	1285083742	9.44658e+08	1201964974	1347283945	6.12607e+08	5.4915e+08	7.59228e+08	834863913	7.75584e+08	1285083742	34	39	39	37	33	38	37	34
High	O60506	Heterogeneous nuclear ribonucleoprotein Q [OS=Homo sapiens]	0	FALSE	435.744	59	31	338	26	623	69.6	8.59	1224.77	31	99.5	99.7	88.7	94.8	98.6	83.1	118.2	103.9	113.4	4.02339e+08	403197845	3.58717e+08	383380439	398632323	3.36018e+08	4.78025e+08	4.20101e+08	4.58339e+08	2.99969e+08	3.64719e+08	3.42476e+08	2.9014e+08	2.67873e+08	2.94508e+08	3.38538e+08	2.69495e+08	4.58339e+08	21	26	27	26	22	25	27	24
High	P63244	Receptor of activated protein C kinase 1 [OS=Homo sapiens]	0	FALSE	434.972	91	25	396	25	317	35.1	7.69	1520.96	25	98	102.9	102.5	93.1	98	91.3	107.2	113.7	93.2	1329153101	1395682193	1390457986	1262889954	1328823853	1237910307	1453031682	1541667820	1263960397	9.90967e+08	1262485478	1327504362	9.55747e+08	892941884	1084985176	1029040576	9.88981e+08	1263960397	29	29	27	28	28	30	28	27
High	Q14152	Eukaryotic translation initiation factor 3 subunit A [OS=Homo sapiens]	0	FALSE	434.091	39	49	328	49	1382	166.5	6.79	1049.51	49	122.6	126.3	131.2	72	71.7	76.7	89.5	106.2	103.8	6.45883e+08	6.65134e+08	690866564	3.79101e+08	3.7765e+08	4.03794e+08	4.71392e+08	5.59103e+08	5.46658e+08	4.81546e+08	6.01657e+08	6.59587e+08	286901126	2.53773e+08	3.53912e+08	3.33841e+08	3.58665e+08	5.46658e+08	44	46	47	42	39	42	44	47
High	P26038	Moesin [OS=Homo sapiens]	0	FALSE	433.567	60	36	498	28	577	67.8	6.4	1442.33	36	66.7	71	74.2	121	107.6	131.5	95.8	96.4	135.6	2.87541e+08	3.06004e+08	3.20013e+08	5.21516e+08	4.63979e+08	5.66916e+08	4.13105e+08	4.15692e+08	5.84443e+08	214379882	2.76801e+08	3.05524e+08	3.9468e+08	3.11784e+08	4.96882e+08	2.92562e+08	2.66667e+08	5.84443e+08	24	29	28	30	27	30	29	25
High	Q93009	Ubiquitin carboxyl-terminal hydrolase 7 [OS=Homo sapiens]	0	FALSE	429.379	53	38	222	38	1102	128.2	5.55	788.05	38	93.9	93.4	107.8	66.4	62.7	73.1	126.7	121.5	154.4	1.81668e+08	1.80747e+08	2.08563e+08	1.28495e+08	1.2133e+08	1.41487e+08	2.45196e+08	2.35068e+08	2.98654e+08	1.35445e+08	1.63497e+08	1.9912e+08	9.72439e+07	8.15314e+07	1.24009e+08	1.73648e+08	1.50796e+08	2.98654e+08	32	33	36	33	27	33	35	35
High	Q04637	eukaryotic translation initiation factor 4 gamma 1 [OS=Homo sapiens]	0	FALSE	428.919	39	46	357	40	1599	175.4	5.33	1133.92	46	95.7	95.8	103.4	103.3	105.7	103.5	99.9	100.2	92.5	2.20313e+08	2.20457e+08	237935197	237729174	2.43173e+08	2.3827e+08	2.29997e+08	2.3063e+08	2.12934e+08	1.64258e+08	1.99418e+08	2.27163e+08	1.79912e+08	1.63407e+08	2.08836e+08	1.62885e+08	1.47949e+08	2.12934e+08	42	43	46	41	38	45	43	40
High	Q9NYU2-1	UDP-glucose:glycoprotein glucosyltransferase 1 [OS=Homo sapiens]	0	FALSE	428.088	49	45	272	45	1555	177.1	5.63	868.89	45	99.4	94.9	95.4	120.2	115.7	110.3	91.1	85.4	87.6	1.48181e+08	1.41584e+08	1.42328e+08	1.79298e+08	172555847	1.64478e+08	1.35808e+08	1.27286e+08	1.30662e+08	1.10479e+08	1.28072e+08	1.35884e+08	1.35691e+08	1.15954e+08	144159520	9.61796e+07	8.16542e+07	1.30662e+08	44	42	42	43	41	41	44	35
High	P17844	probable ATP-dependent RNA helicase DDX5 [OS=Homo sapiens]	0	FALSE	427.882	64	36	403	27	614	69.1	8.92	1327.92	36	75.2	74.8	69.9	83.7	84.8	84.8	150	147	129.9	4.65425e+08	4.62638e+08	4.32048e+08	5.1741e+08	5.24453e+08	5.24303e+08	9.27748e+08	909021561	8.03694e+08	3.47004e+08	4.18486e+08	4.12487e+08	3.91572e+08	3.52422e+08	4.59534e+08	6.57033e+08	5.83138e+08	8.03694e+08	30	30	29	26	28	30	28	30
High	Q5VYK3	Proteasome-associated protein ECM29 homolog [OS=Homo sapiens]	0	FALSE	426.861	42	42	293	42	1845	204.2	7.12	917.29	42	114.6	99.7	112.4	85.9	86.1	72.6	104.5	116.3	107.9	8.98193e+07	7.815e+07	8.81151e+07	6.73773e+07	6.75016e+07	5.68934e+07	8.19257e+07	9.11437e+07	8.46074e+07	6.69659e+07	7.06918e+07	8.41256e+07	5.09907e+07	4.53597e+07	4.9865e+07	5.802e+07	5.84688e+07	8.46074e+07	36	38	39	38	35	38	35	35
High	Q99460	26S proteasome non-ATPase regulatory subunit 1 [OS=Homo sapiens]	0	FALSE	426.348	55	34	267	34	953	105.8	5.39	910.19	34	101.5	116.8	112.9	81.7	73.8	75.8	117.4	103.1	116.9	163184725	1.87857e+08	1.81605e+08	1.31368e+08	1.18588e+08	1.21954e+08	1.88712e+08	1.65856e+08	1.88025e+08	1.21664e+08	1.69928e+08	173382929	9.94187e+07	7.96884e+07	1.06888e+08	1.33646e+08	1.06396e+08	1.88025e+08	30	34	33	29	25	32	31	30
High	P11413-1	Glucose-6-phosphate 1-dehydrogenase [OS=Homo sapiens]	0	FALSE	426.069	77	38	360	38	515	59.2	6.84	1199.5	38	58.8	63.8	55.6	195	197.7	185.9	44	49.6	49.5	3.84929e+08	4.1782e+08	3.63795e+08	1276564484	1293766150	1216918724	288093306	3.24797e+08	3.24268e+08	2.86989e+08	3.77945e+08	347324362	9.66096e+08	8.69384e+08	1066586787	2.04028e+08	2.08358e+08	3.24268e+08	35	34	36	37	37	35	33	33
High	Q12931	heat shock protein 75 kDa, mitochondrial [OS=Homo sapiens]	0	FALSE	424.039	59	33	341	32	704	80.1	8.21	1267.65	33	129.4	131	133.1	68.3	69.3	76.8	98.7	91.4	101.9	7.05974e+08	7.14463e+08	7.25721e+08	3.7237e+08	3.77969e+08	418909770	5.38469e+08	4.98716e+08	5.56011e+08	526347725	6.46279e+08	6.92864e+08	2.81807e+08	2.53988e+08	3.6716e+08	3.81345e+08	3.19926e+08	5.56011e+08	36	35	34	33	30	34	32	33
High	O00159-1	Unconventional myosin-Ic [OS=Homo sapiens]	0	FALSE	423.664	52	48	277	48	1063	121.6	9.41	932.36	48	85.9	68.9	73.1	181.3	204.1	187.2	31.9	34.4	33.1	2.44525e+08	1.96076e+08	2.0808e+08	5.15954e+08	5.80813e+08	5.32711e+08	9.08173e+07	9.78545e+07	9.4098e+07	1.82309e+08	1.77363e+08	1.98659e+08	3.90471e+08	3.90294e+08	466902820	6.4317e+07	6.27737e+07	9.4098e+07	36	38	39	43	43	45	33	29
High	P55786	puromycin-sensitive aminopeptidase [OS=Homo sapiens]	0	FALSE	422.883	55	39	291	4	919	103.2	5.72	1003.69	39	133.5	164.8	158.4	89.7	85.7	105.7	48.8	42.8	70.5	4.70621e+07	5.8103e+07	5.58579e+07	3.16382e+07	3.02221e+07	3.72618e+07	1.72068e+07	1.50801e+07	24870611	3.50878e+07	5.25579e+07	53328950	2.39436e+07	20308622	3.26587e+07	12185906	9.67393e+06	24870611	4	4	4	4	4	4	3	3
High	P55884	Eukaryotic translation initiation factor 3 subunit B [OS=Homo sapiens]	0	FALSE	421.237	57	36	281	36	814	92.4	5	996.43	36	110.3	118.6	111.4	84.7	84.9	83.5	106.2	101.4	99	4.61342e+08	4.96064e+08	4.65816e+08	354088354	355163954	3.49343e+08	4.44011e+08	4.24242e+08	4.14031e+08	3.43959e+08	4.48722e+08	4.44726e+08	267971721	2.38663e+08	3.06187e+08	3.1445e+08	2.72152e+08	4.14031e+08	36	34	36	35	34	35	34	34
High	P78347	General transcription factor II-I [OS=Homo sapiens]	0	FALSE	421.146	47	39	290	39	998	112.3	6.39	905.11	39	64.3	58.8	67.3	135.6	126.8	114.1	119.5	118	95.6	2.01235e+08	1.83924e+08	2.1065e+08	4.2415e+08	3.96659e+08	3.56958e+08	373913255	3.6923e+08	2.98932e+08	1.50033e+08	1.66371e+08	201112793	3.20994e+08	2.66547e+08	3.12861e+08	2.64806e+08	2.36861e+08	2.98932e+08	33	32	33	33	30	36	33	33
High	O60610-1	Protein diaphanous homolog 1 [OS=Homo sapiens]	0	FALSE	420.741	38	33	265	33	1272	141.3	5.41	923.02	33	69.9	75.7	73.7	122	131.5	124.9	96.8	99	106.5	7.54599e+07	8.16512e+07	7.95569e+07	1.31684e+08	1.41921e+08	1.34826e+08	1.0443e+08	1.06784e+08	1.14898e+08	5.62601e+07	7.38588e+07	7.59549e+07	99657560	9.53681e+07	1.1817e+08	7.39572e+07	6.8502e+07	1.14898e+08	30	30	34	33	33	37	35	30
High	P17655-1	Calpain-2 catalytic subunit [OS=Homo sapiens]	0	FALSE	419.701	57	32	241	32	700	79.9	4.98	837.33	32	131	143.3	139.4	80.6	89.2	79	79.6	81.6	76.4	2.55243e+08	2.79161e+08	2.71638e+08	1.57038e+08	1.73737e+08	1.54026e+08	1.55086e+08	158986122	1.48805e+08	1.90299e+08	252519493	2.59339e+08	1.18846e+08	1.16748e+08	1.34998e+08	1.09832e+08	1.0199e+08	1.48805e+08	35	33	35	33	33	34	27	33
High	Q01813	ATP-dependent 6-phosphofructokinase, platelet type [OS=Homo sapiens]	0	FALSE	419.163	65	39	229	35	784	85.5	7.55	768.05	39	148.2	161.3	172.9	80.8	81.3	87.4	49.7	53.8	64.7	4.61672e+08	502409281	538500587	2.51544e+08	2.5331e+08	2.72139e+08	154653292	1.6754e+08	2.01468e+08	3.44205e+08	4.54462e+08	5.1412e+08	1.90367e+08	1.70219e+08	2.3852e+08	109525838	1.07477e+08	2.01468e+08	38	39	36	32	31	37	29	29
High	P61978-3	Isoform 3 of Heterogeneous nuclear ribonucleoprotein K [OS=Homo sapiens]	0	FALSE	418.952	64	29	936	1	440	48.5	5.54	2957.53	29	138.6	112.6	108.8	59	58.4	62.3	134.3	118.8	107.3	2.15239e+07	1.74827e+07	1.68934e+07	9.15683e+06	9.06759e+06	9.66937e+06	2.08573e+07	1.84501e+07	1.66561e+07	1.60474e+07	1.58142e+07	16128514	6.92983e+06	6.09323e+06	8.47487e+06	1.47712e+07	1.18357e+07	1.66561e+07	1	1	1	1	1	1	1	1
High	Q13838-1	spliceosome RNA helicase DDX39B [OS=Homo sapiens]	0	FALSE	417.809	73	29	438	15	428	49	5.67	1594	29	93.9	100.6	109.8	86.3	80.9	93.2	90.3	112.4	132.6	2.68729e+08	2.87887e+08	3.14324e+08	2.47029e+08	2.31555e+08	2.66706e+08	2.58559e+08	3.21808e+08	3.7963e+08	2.00354e+08	2.60412e+08	300092500	1.8695e+08	1.556e+08	2.33759e+08	1.83112e+08	2.0644e+08	3.7963e+08	17	19	19	16	16	18	17	17
High	Q9Y678	Coatomer subunit gamma-1 [OS=Homo sapiens]	0	FALSE	415.994	63	36	332	35	874	97.7	5.47	1047.33	36	71.1	69.7	68.4	132.9	131.1	133.2	103.2	95.4	94.8	1.37866e+08	1.35256e+08	1.32714e+08	2.57781e+08	2.54309e+08	2.58316e+08	2.00103e+08	1.85044e+08	1.83868e+08	1.02788e+08	1.22348e+08	1.26705e+08	1.95087e+08	1.7089e+08	2.26405e+08	1.41713e+08	1.18706e+08	1.83868e+08	31	34	33	35	33	37	34	32
High	P06748	Nucleophosmin [OS=Homo sapiens]	0	FALSE	415.909	52	12	307	12	294	32.6	4.78	1324.07	12	116.9	146.2	131.8	59.9	54.5	73.9	105.3	84.1	127.4	1015596465	1269868887	1144838352	520303835	4.73059e+08	6.42241e+08	9.15062e+08	730932571	1106286641	7.57191e+08	1148679145	1093005270	393762496	3.17886e+08	562901863	6.48049e+08	4.68894e+08	1106286641	16	16	19	15	14	16	14	17
High	sp Q06830	peroxiredoxin-1 [OS=Homo sapiens]	0	TRUE	414.771	84	28	427	25	199	22.1	8.13	1561.02	28	132.6	142.3	133.5	92	91	90.8	78.8	70	69	2981110993	3199185773	3000541085	2067329325	2044804119	2040772254	1771221064	1574491158	1551294275	2222605162	2893871970	2864690209	1564541140	1374065674	1788665650	1254383071	1010037136	1551294275	26	27	28	27	29	25	26	27
High	P22234	multifunctional protein ADE2 [OS=Homo sapiens]	0	FALSE	414.615	81	32	364	32	425	47	7.23	1356.29	32	102.7	88.5	98.4	87.9	88.1	83.4	125.3	134.8	91	1031762917	8.89058e+08	9.89241e+08	8.8352e+08	8.85228e+08	8.3775e+08	1258871629	1354354330	9.1413e+08	7.69244e+08	8.04211e+08	9.44453e+08	6.68642e+08	5.94855e+08	7.34259e+08	8.91536e+08	8.68819e+08	9.1413e+08	32	31	34	33	30	33	32	31
High	P21980	Protein-glutamine gamma-glutamyltransferase 2 [OS=Homo sapiens]	0	FALSE	411.62	69	32	173	32	687	77.3	5.22	607.25	32	10.3	7.9	5.9	297.7	298.3	266.5	4.6	4.2	4.7	2.77737e+07	2.13405e+07	1.58002e+07	8.02811e+08	8.04245e+08	7.18562e+08	1.23307e+07	1.1195e+07	1.26084e+07	2.0707e+07	1.93039e+07	1.50849e+07	6.07562e+08	540435739	6.29795e+08	8.73266e+06	7.18159e+06	1.26084e+07	15	19	16	40	37	38	14	12
High	P22626	heterogeneous nuclear ribonucleoproteins A2/B1 [OS=Homo sapiens]	0	FALSE	411.441	63	25	571	23	353	37.4	8.95	2030.98	25	87.7	86.8	91.3	84.6	84.4	97	138.1	109.9	120.1	1524974217	1507865739	1587465948	1470054597	1467519655	1686661395	2400683313	1909516862	2088138986	1136963895	1363962804	1515592698	1112527582	9.86143e+08	1478299842	1700169769	1224956350	2088138986	25	27	27	26	25	26	26	24
High	P48643-2	Isoform 2 of T-complex protein 1 subunit epsilon [OS=Homo sapiens]	0	FALSE	408.734	79	30	366	1	448	49.5	6.19	1296.54	30
High	P09525	annexin A4 [OS=Homo sapiens]	0	FALSE	407.242	74	29	302	29	319	35.9	6.13	987.94	29	23.3	27.6	24.3	246.8	232.6	228.5	39.7	37.2	39.9	1.90888e+08	2.25758e+08	1.99249e+08	2019994952	1903911786	1870275197	3.25069e+08	304822594	3.26979e+08	1.42319e+08	2.04212e+08	1.90228e+08	1528718800	1279388967	1639230931	2.30215e+08	1.95544e+08	3.26979e+08	22	28	25	33	31	34	26	24
High	O75694	nuclear pore complex protein nup155 [OS=Homo sapiens]	0	FALSE	405.642	39	31	227	31	1391	155.1	6.16	852.02	31	102.1	90.8	97.8	83.6	80.7	83.1	128.5	129	104.4	8.82914e+07	7.84878e+07	8.45314e+07	7.23313e+07	6.97399e+07	7.18174e+07	1.11137e+08	1.11589e+08	9.0302e+07	6.58268e+07	7.09973e+07	8.07042e+07	5.47399e+07	4.68638e+07	6.29454e+07	7.87078e+07	7.15842e+07	9.0302e+07	28	31	32	25	25	31	28	28
High	P23921	Ribonucleoside-diphosphate reductase large subunit [OS=Homo sapiens]	0	FALSE	405.347	72	34	227	34	792	90	7.15	832.18	34	87.7	108.9	101.3	106.4	99.6	117.5	93.7	86.1	98.7	1.31704e+08	1.63608e+08	1.52129e+08	1.59749e+08	1.49556e+08	1.76524e+08	1.40733e+08	1.2934e+08	1.48238e+08	9.81937e+07	1.47994e+08	1.45241e+08	1.20897e+08	1.00499e+08	1.54717e+08	9.96676e+07	8.29715e+07	1.48238e+08	31	36	36	32	33	39	33	29
High	Q9H0A0	RNA cytidine acetyltransferase [OS=Homo sapiens]	0	FALSE	404.347	53	41	295	41	1025	115.7	8.27	1011.37	41	118.9	97.1	102.3	62.3	66.6	66.4	122.8	139.2	124.5	2.22295e+08	1.81411e+08	1.91151e+08	1.16472e+08	1.24407e+08	1.24016e+08	2.29584e+08	2.60191e+08	2.32615e+08	1.65735e+08	1.64098e+08	1.82497e+08	8.81451e+07	8.35992e+07	1.08696e+08	162591933	166912492	2.32615e+08	40	40	41	36	36	37	39	39
High	P09211	Glutathione S-transferase P [OS=Homo sapiens]	0	FALSE	404.225	91	14	604	1	210	23.3	5.64	2066.38	14	34.9	57.1	47.4	58.9	34	69	110.1	127.5	360.9	6.08377e+06	9.95334e+06	8.26201e+06	1.02604e+07	5.92599e+06	1.20165e+07	1.91828e+07	2.22102e+07	6.28621e+07	4.53583e+06	9003446	7887944	7765028	3.98214e+06	1.05321e+07	13585314	1.42479e+07	6.28621e+07	1	1	1	1	1	1	1	1
High	Q14764	major vault protein [OS=Homo sapiens]	0	FALSE	404.162	62	38	183	38	893	99.3	5.48	694.36	38	114.1	109.1	110.7	187.2	170.7	158.2	17.1	15.2	17.8	1.82402e+08	1.74446e+08	1.76963e+08	2.99303e+08	2.72973e+08	2.52908e+08	2.73092e+07	2.43523e+07	2.84495e+07	1.35992e+08	1.57798e+08	1.68951e+08	226510458	1.83432e+08	2.21665e+08	1.93404e+07	1.5622e+07	2.84495e+07	32	33	34	32	32	35	22	18
High	P31943	Heterogeneous nuclear ribonucleoprotein H [OS=Homo sapiens]	0	FALSE	403.813	58	19	427	12	449	49.2	6.3	1612.46	19	94.5	119.5	130	68.6	52.7	78.4	111.6	107.1	137.7	1.91564e+08	2.42248e+08	2.63685e+08	1.39089e+08	1.06775e+08	1.59004e+08	2.26308e+08	2.17231e+08	2.79285e+08	142823294	2.19129e+08	2.51747e+08	105261689	7.17504e+07	1.39361e+08	1.60272e+08	1.39354e+08	2.79285e+08	15	16	20	16	14	14	18	18
High	P09960-1	leukotriene A-4 hydrolase [OS=Homo sapiens]	0	FALSE	403.185	68	34	286	34	611	69.2	6.18	991.95	34	129.8	139.9	123.3	73.2	71.6	64.9	98	108.3	90.9	3.00627e+08	3.23843e+08	2.85564e+08	169563173	1.65856e+08	1.5022e+08	2.26897e+08	2.50844e+08	210522177	224136145	2.92937e+08	272634924	1.28324e+08	1.11452e+08	1.31662e+08	1.60689e+08	1.60917e+08	210522177	35	33	35	31	33	32	33	34
High	P55786-2	Isoform 2 of Puromycin-sensitive aminopeptidase [OS=Homo sapiens]	0	FALSE	402.442	57	36	265	1	839	94.5	5.38	929.95	36
High	sp		0	TRUE	401.662	91	14	624	1	209	23.2	5.64	2148.67	14	90.7	95.9	75	150.1	118.5	150.9	56.4	67.4	95.2	5.16207e+08	546290318	4.27107e+08	8.54758e+08	6.74578e+08	8.58952e+08	3.212e+08	3.83536e+08	541921296	384864778	4.94155e+08	407769216	646874819	4.53302e+08	7.52842e+08	227474416	246038395	541921296	1	1	1	1	1	1	1	1
High	P20700	Lamin-B1 [OS=Homo sapiens]	0	FALSE	398.766	61	37	328	34	586	66.4	5.16	1141.21	37	84.6	86.5	92	97.7	101.3	107.1	119.8	103	107.9	4.19097e+08	4.28499e+08	4.55668e+08	4.83978e+08	5.01847e+08	5.30408e+08	5.93413e+08	5.1014e+08	5.3436e+08	312463225	3.87605e+08	435037268	3.66271e+08	3.37231e+08	4.64884e+08	4.20257e+08	3.27255e+08	5.3436e+08	33	34	35	32	31	37	33	33
High	P52209	6-phosphogluconate dehydrogenase, decarboxylating [OS=Homo sapiens]	0	FALSE	398.433	76	29	380	29	483	53.1	7.23	1357.91	29	87.2	92.2	88.5	111.4	105.4	105.4	114.8	99.3	95.8	4.17484e+08	4.41166e+08	4.23769e+08	5.33124e+08	5.04787e+08	5.04506e+08	549465015	4.75267e+08	4.58839e+08	3.1126e+08	3.99064e+08	4.04582e+08	4.03465e+08	3.39206e+08	4.42182e+08	3.89132e+08	3.04884e+08	4.58839e+08	33	29	32	29	29	34	31	30
High	P62258-1	14-3-3 protein epsilon [OS=Homo sapiens]	0	FALSE	397.079	78	24	611	22	255	29.2	4.74	1992.25	24	82.7	94.6	98	69.8	62	72.8	147.9	124.1	148.1	8.78524e+08	1005118884	1041751095	7.4158e+08	6.58725e+08	7.73821e+08	1571370515	1318509545	1573424546	6.54995e+08	909195518	9.94585e+08	5.61223e+08	4.4265e+08	6.78227e+08	1112848426	845824759	1573424546	29	29	29	27	26	28	29	28
High	P05091	Aldehyde dehydrogenase, mitochondrial [OS=Homo sapiens]	0	FALSE	396.32	72	32	254	30	517	56.3	7.05	876.49	32	49.2	39.6	36.9	109.5	107.7	93.4	155.2	155.1	153.3	1.41621e+08	1.13787e+08	1.06263e+08	3.14824e+08	3.09791e+08	268722859	446397639	4.46159e+08	4.41072e+08	1.05588e+08	1.02927e+08	1.01452e+08	2.38257e+08	2.08173e+08	2.35526e+08	3.1614e+08	2.86212e+08	4.41072e+08	25	27	29	31	28	29	29	31
High	P36551	Oxygen-dependent coproporphyrinogen-III oxidase, mitochondrial [OS=Homo sapiens]	0	FALSE	395.973	71	32	192	32	454	50.1	8.25	723.35	32	257.3	306.2	237.5	13.4	12.2	12.2	21.1	20.3	19.8	1156636953	1376480671	1067699984	6.03998e+07	5.49356e+07	5.48916e+07	9.50378e+07	9.13913e+07	8.89052e+07	8.62345e+08	1245116450	1019359376	4.57101e+07	3.69156e+07	4.81106e+07	6.7306e+07	5.86276e+07	8.89052e+07	30	30	31	17	17	19	24	19
High	Q92900	Regulator of nonsense transcripts 1 [OS=Homo sapiens]	0	FALSE	395.606	54	44	192	44	1129	124.3	6.61	662.65	44	89.4	95.5	92.4	79.9	82.7	78.4	128.5	130.6	122.7	1.71716e+08	1.83454e+08	1.77509e+08	1.53647e+08	158843233	150760737	246955869	2.5095e+08	2.35801e+08	1.28025e+08	1.65946e+08	1.69472e+08	1.16279e+08	106739336	1.32137e+08	1.74895e+08	1.60984e+08	2.35801e+08	35	40	39	33	32	35	36	38
High	P27348	14-3-3 protein theta [OS=Homo sapiens]	0	FALSE	395.114	60	17	436	15	245	27.7	4.78	1613.4	17	87.3	90.9	96.9	91.2	78.6	77.5	145.5	117.4	114.7	4.3468e+08	4.52678e+08	4.82335e+08	4.54046e+08	3.91122e+08	3.86026e+08	7.24398e+08	5.84794e+08	5.7124e+08	3.24081e+08	4.09477e+08	4.60497e+08	3.43619e+08	2.62826e+08	3.38338e+08	5.13021e+08	3.75146e+08	5.7124e+08	20	21	20	18	20	20	20	19
High	P63104	14-3-3 protein zeta/delta [OS=Homo sapiens]	0	FALSE	394.803	72	21	784	19	245	27.7	4.79	2521.55	21	120.3	131.8	128.2	89.3	97	98.3	82.9	77.6	74.7	1675826542	1835004520	1784809410	1243160162	1350099095	1368743835	1154433925	1080287073	1040178271	1249433762	1659881145	1704001344	9.40815e+08	9.07238e+08	1199656197	8.17573e+08	6.93005e+08	1040178271	29	27	28	27	26	29	29	26
High	Q12769	nuclear pore complex protein Nup160 [OS=Homo sapiens]	0	FALSE	390.016	38	29	223	29	1436	162	5.5	806.46	29	99.5	88.2	92.1	88.8	93.9	82.9	114.7	133.5	106.4	6.0259e+07	5.34153e+07	5.5734e+07	5.37596e+07	5.68287e+07	5.01627e+07	6.94448e+07	8.08238e+07	6.44146e+07	4.49268e+07	4.83176e+07	5.32107e+07	4.06849e+07	3.81877e+07	4.39659e+07	4.91809e+07	5.18485e+07	6.44146e+07	27	26	27	23	23	28	27	26
High	P14923	Junction plakoglobin [OS=Homo sapiens]	0	FALSE	389.861	59	30	296	26	745	81.7	6.14	1053.85	30	82.8	72.2	67.4	186.4	197.2	193.3	31.7	33.8	35.3	1.77999e+08	1.55227e+08	1.44815e+08	4.007e+08	4.23825e+08	4.15457e+08	6.81898e+07	7.26414e+07	7.58634e+07	1.32709e+08	1.40413e+08	1.38259e+08	3.03247e+08	2.84802e+08	3.64134e+08	4.82922e+07	4.65995e+07	7.58634e+07	29	30	28	32	31	31	23	22
High	H-INV:HIT000292931	Tax_Id=9606 Gene_Symbol=- Similar to Keratin, type II cytoskeletal 8	0	TRUE	389.256	38	22	831	1	443	49.4	5.2	2592.87	22				100.9			608.1		190.9				343556			2.07001e+06		649900				260001			1.46599e+06		649900				1			2
High	P29144	Tripeptidyl-peptidase 2 [OS=Homo sapiens]	0	FALSE	388.234	51	43	178	43	1249	138.3	6.32	603.82	43	37.2	33.7	35.9	105.2	104.2	96.8	170.6	171.3	145.2	6.16647e+07	5.58345e+07	5.93842e+07	1.74181e+08	1.7254e+08	1.60402e+08	2.82504e+08	2.83645e+08	2.40507e+08	4.59749e+07	5.05059e+07	5.66956e+07	1.31819e+08	1.15943e+08	140587158	2.0007e+08	1.81958e+08	2.40507e+08	29	31	32	39	35	40	41	39
High	P13797	Plastin-3 [OS=Homo sapiens]	0	FALSE	386.637	66	32	215	26	630	70.8	5.6	777.13	32	49.4	47.8	50.6	100.8	112.7	99.7	147.2	160.4	131.4	6.26069e+07	6.05661e+07	6.41182e+07	1.27695e+08	1.42657e+08	1.26222e+08	1.86354e+08	2.03049e+08	1.66374e+08	4.66773e+07	5.4786e+07	6.12152e+07	9.66386e+07	9.58622e+07	1.10629e+08	1.31976e+08	130256201	1.66374e+08	20	24	22	27	25	26	28	26
High	Q9UPN3-2	Isoform 2 of Microtubule-actin cross-linking factor 1, isoforms 1/2/3/5 [OS=Homo sapiens]	0	FALSE	385.708	14	42	154	41	5430	620	5.38	506.12	42	112.6	95.2	97	60.6	63	57.6	139.8	154.3	119.9	3.63455e+07	3.07146e+07	3.13115e+07	1.95539e+07	2.03326e+07	1.8574e+07	4.51036e+07	4.97878e+07	3.87045e+07	2.70979e+07	2.77833e+07	2.98938e+07	1.47983e+07	1.36631e+07	1.62795e+07	3.19425e+07	3.19389e+07	3.87045e+07	25	27	27	20	22	24	30	30
High	Q92973-2	Isoform 2 of Transportin-1 [OS=Homo sapiens]	0	FALSE	383.877	61	34	272	28	890	101.2	4.96	829.25	34	91.6	91.9	88.9	71.5	70.2	68.3	186.5	114.2	117	9.86617e+07	9.90297e+07	9.57e+07	7.69828e+07	7.55981e+07	7.35264e+07	2.00908e+08	1.22957e+08	1.2602e+08	7.35585e+07	8.95788e+07	9.13671e+07	5.82601e+07	5.08003e+07	6.44433e+07	1.42284e+08	7.88769e+07	1.2602e+08	24	26	25	23	22	28	30	25
High	P35606	Coatomer subunit beta' [OS=Homo sapiens]	0	FALSE	382.733	50	31	226	31	906	102.4	5.27	815.62	31	77.4	82.2	79	140.6	135.8	126.2	91.2	90.3	77.4	1.76432e+08	1.87434e+08	1.80043e+08	3.20609e+08	3.0954e+08	2.87747e+08	2.07987e+08	2.05878e+08	1.76469e+08	1.31541e+08	1.69546e+08	1.71891e+08	2.42635e+08	2.08004e+08	2.522e+08	1.47297e+08	1.32071e+08	1.76469e+08	30	31	31	32	30	32	31	24
High	O14980	Exportin-1 [OS=Homo sapiens]	0	FALSE	380.46	53	41	298	41	1071	123.3	6.06	976.57	41	87.8	85.6	91.3	87.6	90.9	91.4	126.7	125.7	113	2.30942e+08	225160639	240199848	2.30319e+08	2.3911e+08	2.40337e+08	3.33257e+08	3.30537e+08	2.97212e+08	172181763	203672468	2.29325e+08	1.74304e+08	1.60677e+08	2.10647e+08	2.36014e+08	2.1204e+08	2.97212e+08	37	37	40	33	35	34	39	36
High	P36578	60S ribosomal protein L4 [OS=Homo sapiens]	0	FALSE	380.265	50	27	445	27	427	47.7	11.06	1608.46	27	115.3	111.2	111.4	85.1	87.6	93.8	97.9	93.9	103.8	1649849133	1591734482	1595170980	1218438062	1253240849	1343117838	1401905766	1344185977	1485244850	1230065974	1439827546	1522948881	922105855	8.42152e+08	1177195905	9.92833e+08	8.62296e+08	1485244850	32	32	32	31	30	32	31	31
High	Q1KMD3	heterogeneous nuclear ribonucleoprotein U-like protein 2 [OS=Homo sapiens]	0	FALSE	380.157	51	35	240	35	747	85.1	4.91	843.95	35	62	51.9	51.6	131.6	142.1	118.6	138.6	118	85.6	234798866	196418213	1.95405e+08	4.98262e+08	5.37998e+08	4.48853e+08	5.24528e+08	4.46561e+08	3.24216e+08	1.75057e+08	177673071	1.86557e+08	3.77081e+08	3.61524e+08	393403794	3.71472e+08	2.86469e+08	3.24216e+08	31	34	34	32	31	35	35	29
High	Q06210-1	glutamine--fructose-6-phosphate aminotransferase [isomerizing] 1 [OS=Homo sapiens]	0	FALSE	380.045	59	33	296	27	699	78.8	7.11	1072.19	33	57.8	54.2	50.3	172.6	181.4	183.5	64.3	67.8	68.1	1.29518e+08	121373487	1.12584e+08	3.8647e+08	4.06217e+08	4.10781e+08	1.43964e+08	1.51786e+08	1.52435e+08	9.65641e+07	1.0979e+08	1.07487e+08	2.92478e+08	2.72969e+08	3.60035e+08	1.01956e+08	9.73711e+07	1.52435e+08	24	23	26	24	27	26	23	24
High	P40939	Trifunctional enzyme subunit alpha, mitochondrial [OS=Homo sapiens]	0	FALSE	379.014	55	29	292	29	763	82.9	9.04	1015.6	29	88.6	96.2	97.5	102.4	92	105	105.5	87.2	125.5	1.84889e+08	2.00717e+08	2.03302e+08	2.13678e+08	1.91877e+08	2.19019e+08	2.2006e+08	1.81924e+08	2.61759e+08	1.37846e+08	1.81561e+08	1.94098e+08	1.6171e+08	1.28937e+08	1.91963e+08	1.55847e+08	1.16704e+08	2.61759e+08	30	29	30	30	29	32	30	31
High	O60664-1	Perilipin-3 [OS=Homo sapiens]	0	FALSE	378.621	68	20	176	20	434	47	5.44	711.44	20	149.1	184.9	187.9	54.5	67.5	46.2	91.1	71.8	47.2	4.60566e+08	5.70952e+08	5.80146e+08	1.68144e+08	208372980	1.42574e+08	2.81176e+08	2.21617e+08	1.45615e+08	3.43381e+08	5.16463e+08	5.5388e+08	1.27251e+08	1.40022e+08	1.24961e+08	1.9913e+08	1.42168e+08	1.45615e+08	22	23	25	21	17	22	23	20
High	P47897	glutamine--tRNA ligase [OS=Homo sapiens]	0	FALSE	378.543	62	35	278	35	775	87.7	7.15	1005.88	35	114.1	108.8	100.7	104.4	100.9	99.1	92.6	92.7	86.8	283440858	2.70229e+08	2.50127e+08	2.5929e+08	2.507e+08	2.46281e+08	2.2994e+08	2.3035e+08	2.15634e+08	2.11323e+08	244439479	2.38803e+08	196228659	1.68465e+08	215856976	1.62844e+08	1.47769e+08	2.15634e+08	35	35	36	32	31	33	36	36
High	Q12906-1	Interleukin enhancer-binding factor 3 [OS=Homo sapiens]	0	FALSE	378.456	52	34	261	28	894	95.3	8.76	889.68	34	137.9	124.8	115.9	53.2	52.1	59.3	102.3	106	148.4	5.10456e+08	4.62118e+08	4.29304e+08	1.9697e+08	1.92736e+08	2.19734e+08	3.78873e+08	3.92608e+08	5.49484e+08	3.80577e+08	4.18016e+08	4.09867e+08	149065837	1.29515e+08	1.92589e+08	2.68318e+08	2.51858e+08	5.49484e+08	27	30	28	22	25	27	26	26
High	Q07021	Complement component 1 Q subcomponent-binding protein, mitochondrial [OS=Homo sapiens]	0	FALSE	376.117	65	12	306	12	282	31.3	4.84	1258.57	12	98.2	98.7	90.4	45.4	45.9	41	229.1	140.2	111.1	2.28381e+08	2.29635e+08	2.10393e+08	105691828	1.06822e+08	9.5504e+07	5.32972e+08	3.2617e+08	258455151	1.70272e+08	2.07719e+08	2.00868e+08	7.99869e+07	7.17819e+07	8.37059e+07	3.77452e+08	2.09238e+08	258455151	18	18	18	17	15	17	17	15
High	Q92499	ATP-dependent RNA helicase DDX1 [OS=Homo sapiens]	0	FALSE	375.673	57	33	272	33	740	82.4	7.23	1060.7	33	83.9	63.3	79.7	101	108.8	88.5	113.4	145.2	116.2	1.70373e+08	1.28398e+08	161787523	2.04907e+08	2.20863e+08	1.79642e+08	2.30082e+08	2.94701e+08	2.35877e+08	1.27023e+08	1.16144e+08	1.54463e+08	155072305	1.48415e+08	1.5745e+08	162944814	1.89051e+08	2.35877e+08	30	31	31	32	30	29	33	28
High	Q8TEX9-1	Importin-4 [OS=Homo sapiens]	0	FALSE	375.32	48	33	237	33	1081	118.6	4.96	788.51	33	77.2	74	78.5	81.3	97.5	90.2	119.6	139.2	142.4	1.03021e+08	9.87685e+07	1.04666e+08	1.08463e+08	1.30132e+08	1.20378e+08	1.59614e+08	1.85763e+08	1.89915e+08	7.68085e+07	8.93426e+07	9.99267e+07	8.2084e+07	8.74462e+07	1.05507e+08	1.13039e+08	1.19167e+08	1.89915e+08	31	33	32	32	32	35	34	33
High	P18206	Vinculin [OS=Homo sapiens]	0	FALSE	371.798	48	43	254	43	1134	123.7	5.66	867.4	43	106.3	112.4	128.5	63.2	60.9	58.2	127.9	110.3	132.3	3.43149e+08	3.62999e+08	4.14886e+08	2.0396e+08	1.96735e+08	1.88083e+08	4.12985e+08	3.56328e+08	427264238	2.55839e+08	3.28356e+08	3.96102e+08	1.54356e+08	1.32202e+08	1.64848e+08	2.92477e+08	2.28585e+08	427264238	42	44	44	40	35	40	38	37
High	Q8IY67-2	Isoform 2 of Ribonucleoprotein PTB-binding 1 [OS=Homo sapiens]	0	FALSE	371.505	74	24	181	24	739	77.8	8.84	703.11	24	105.7	101.5	106.1	80.8	72.1	76.7	124.8	119.5	112.9	7.59712e+07	7.29699e+07	7.62146e+07	5.80572e+07	5.17907e+07	5.50899e+07	8.9684e+07	8.58933e+07	8.11261e+07	5.66413e+07	6.60061e+07	7.27639e+07	4.39373e+07	3.48023e+07	4.82844e+07	6.35144e+07	5.51006e+07	8.11261e+07	24	26	26	24	22	22	22	21
High	Q15046	Lysine--tRNA ligase [OS=Homo sapiens]	0	FALSE	370.191	71	33	244	33	597	68	6.35	870.26	33	59.4	69.9	75.6	65.5	62.3	68.3	143	153.4	202.4	2.47232e+08	2.90873e+08	3.14763e+08	2.72685e+08	2.59345e+08	2.84241e+08	5.95209e+08	6.38375e+08	8.42187e+08	1.84327e+08	2.63114e+08	3.00512e+08	2.06366e+08	1.74274e+08	2.49127e+08	4.21528e+08	4.09518e+08	8.42187e+08	30	33	34	28	27	34	34	29
High	Q9NU22	Midasin [OS=Homo sapiens]	0	FALSE	367.624	15	48	163	48	5596	632.4	5.68	524.96	48	76.6	77.5	88.9	71.1	81.3	73	149.3	157.1	125.2	2.58404e+07	2.61245e+07	2.99751e+07	2.39833e+07	2.7431e+07	2.46048e+07	5.03428e+07	5.2967e+07	4.22205e+07	1.92657e+07	2.36313e+07	2.86179e+07	1.81504e+07	1.8433e+07	2.15653e+07	3.56529e+07	3.39784e+07	4.22205e+07	37	35	36	35	33	32	35	41
High	Q9BUF5	Tubulin beta-6 chain [OS=Homo sapiens]	0	FALSE	364.201	73	23	1180	11	446	49.8	4.88	4084.12	23	203.9	255.7	266.4	6.8	7.3	6.9	56.5	37.2	59.2	4.47105e+07	5.60665e+07	5.84186e+07	1.49315e+06	1.60632e+06	1.52133e+06	1.23968e+07	8.15151e+06	1.29774e+07	3.33345e+07	5.07158e+07	55773639	1.13001e+06	1.07941e+06	1333395	8.77946e+06	5.2292e+06	1.29774e+07	8	8	9	1	2	1	9	6
High	O75083	WD repeat-containing protein 1 [OS=Homo sapiens]	0	FALSE	363.623	63	23	208	23	606	66.2	6.65	838.03	23	83.5	89.2	84.2	132.1	137.2	126.3	93.9	80	73.6	2.5647e+08	2.74024e+08	258556463	4.05738e+08	4.21424e+08	3.87977e+08	2.88305e+08	2.45843e+08	2.26231e+08	1.91215e+08	2.47873e+08	2.4685e+08	3.0706e+08	2.83188e+08	3.40048e+08	2.04179e+08	1.57708e+08	2.26231e+08	25	24	25	24	25	25	25	21
High	P13489	Ribonuclease inhibitor [OS=Homo sapiens]	0	FALSE	362.875	82	23	249	23	461	49.9	4.82	985.98	23	99.8	87.5	91.5	144.7	149.6	132.5	72.5	67.6	54.2	203510525	178552235	1.86571e+08	2.95154e+08	3.05082e+08	2.70225e+08	1.47931e+08	1.37886e+08	1.10637e+08	1.5173e+08	1.61512e+08	1.78124e+08	2.23371e+08	2.05009e+08	2.36843e+08	1.04765e+08	8.84542e+07	1.10637e+08	22	21	21	23	23	22	21	22
High	Q01518-1	adenylyl cyclase-associated protein 1 [OS=Homo sapiens]	0	FALSE	360.216	60	25	443	1	475	51.9	8.06	1583.54	25	152.5	41.9	131.4	193.8	95.8	68.4	63.7	66.3	86.2	2.61753e+07	7.19183e+06	2.25584e+07	3.3271e+07	1.64432e+07	1.17326e+07	1.09414e+07	1.13733e+07	14800518	19515348	6.50548e+06	21537040	25179267	1.10495e+07	1.02832e+07	7.74872e+06	7.29596e+06	14800518	1	1	1	1	2	2	1	2
High	A5YKK6	CCR4-NOT transcription complex subunit 1 [OS=Homo sapiens]	0	FALSE	359.333	21	32	206	32	2376	266.8	7.11	655.99	32	89.2	87.8	86.9	86.8	98.7	104.5	132.7	104	109.2	5.89094e+07	5.79682e+07	5.73875e+07	5.73123e+07	6.52035e+07	6.90298e+07	8.76556e+07	6.86874e+07	7.21345e+07	4.39207e+07	5.24361e+07	5.47892e+07	4.33736e+07	4.38154e+07	6.05022e+07	6.20779e+07	4.4063e+07	7.21345e+07	30	33	34	32	30	32	31	30
High	O60701	UDP-glucose 6-dehydrogenase [OS=Homo sapiens]	0	FALSE	358.005	76	28	301	28	494	55	7.12	1141.34	28	75.2	69.8	66	129.4	137.3	133.1	101.8	95.9	91.6	2.83251e+08	2.62785e+08	2.48504e+08	4.87345e+08	5.17073e+08	5.01293e+08	3.83528e+08	3.61132e+08	3.44833e+08	2.11181e+08	2.37706e+08	2.37253e+08	3.6882e+08	3.47462e+08	4.39365e+08	2.71616e+08	231666162	3.44833e+08	26	25	25	27	27	27	27	28
High	P30153	serine/threonine-protein phosphatase 2A 65 kDa regulatory subunit A alpha isoform [OS=Homo sapiens]	0	FALSE	357.187	66	30	301	23	589	65.3	5.11	1149.62	30	94.2	109.2	117.5	83.2	80.2	90.1	105.3	92.7	127.4	3.13498e+08	3.63511e+08	3.9105e+08	2.77016e+08	2.67082e+08	2.99935e+08	3.50607e+08	3.08686e+08	4.24131e+08	233732494	3.2882e+08	3.73345e+08	2.09644e+08	1.79474e+08	2.62882e+08	2.48301e+08	1.98022e+08	4.24131e+08	23	24	24	23	23	24	22	22
High	O60841	Eukaryotic translation initiation factor 5B [OS=Homo sapiens]	0	FALSE	356.072	40	31	237	31	1220	138.7	5.49	799.84	31	92.6	98.8	92.9	87.6	91.9	92.2	125.3	111.6	107	1.07402e+08	1.14644e+08	107860767	1.01696e+08	1.06644e+08	1.07025e+08	1.45436e+08	1.29557e+08	1.24119e+08	8.00752e+07	1.03703e+08	1.02977e+08	7.69632e+07	7.16626e+07	9.38036e+07	1.02998e+08	8.3111e+07	1.24119e+08	31	30	29	27	27	31	30	28
High	P49915	GMP synthase [glutamine-hydrolyzing] [OS=Homo sapiens]	0	FALSE	355.621	64	32	216	32	693	76.7	6.87	796.94	32	97	98.5	98.8	79.1	79.9	91.1	129.5	112.1	114	1.88108e+08	1.90919e+08	1.91629e+08	1.53345e+08	1.54929e+08	1.76689e+08	2.51006e+08	2.17319e+08	2.21113e+08	1.40247e+08	1.72699e+08	1.82953e+08	1.1605e+08	1.04109e+08	1.54862e+08	1.77763e+08	1.3941e+08	2.21113e+08	28	27	32	27	28	30	30	29
High	P51659-1	peroxisomal multifunctional enzyme type 2 [OS=Homo sapiens]	0	FALSE	355.403	56	31	229	31	736	79.6	8.84	875.63	31	93.1	96.4	90.9	160.2	164.3	152.4	54.7	47.5	40.4	2.54362e+08	2.63345e+08	2.48347e+08	4.37693e+08	4.48694e+08	4.16302e+08	1.4951e+08	1.29802e+08	1.10245e+08	1.89642e+08	2.38213e+08	2.37103e+08	3.31243e+08	3.01513e+08	3.64874e+08	1.05883e+08	8.32681e+07	1.10245e+08	33	32	31	31	32	32	32	28
High	Q9UMS4	Pre-mRNA-processing factor 19 [OS=Homo sapiens]	0	FALSE	355.044	68	17	199	17	504	55.1	6.61	781.91	17	84	96.5	86.1	88	89.2	97.3	137.7	104.9	116.2	1.9634e+08	2.25501e+08	2.01269e+08	2.05733e+08	2.08514e+08	2.27423e+08	3.21688e+08	2.45107e+08	2.71462e+08	1.46383e+08	2.0398e+08	1.92157e+08	1.55697e+08	1.40117e+08	1.99328e+08	2.2782e+08	1.57236e+08	2.71462e+08	19	20	20	17	18	18	20	18
High	O60763-1	General vesicular transport factor p115 [OS=Homo sapiens]	0	FALSE	354.882	43	26	234	26	962	107.8	4.91	777.09	26	119.2	124.4	117.8	91	95.7	106.6	73.9	85.9	85.5	1.88946e+08	1.97136e+08	1.86746e+08	1.44162e+08	151704169	1.68924e+08	1.17075e+08	1.361e+08	1.35537e+08	1.40871e+08	1.78322e+08	1.78291e+08	1.09101e+08	1.01942e+08	1.48056e+08	8.29131e+07	8.73085e+07	1.35537e+08	28	29	30	27	26	29	25	25
High	P25205	DNA replication licensing factor mcm3 [OS=Homo sapiens]	0	FALSE	353.462	57	37	245	37	808	90.9	5.77	838.48	37	86	88.7	88.8	67.5	69.8	76.8	143.2	155.8	123.3	2.38424e+08	2.45844e+08	246023031	1.87178e+08	1.93515e+08	2.1288e+08	3.96855e+08	4.31953e+08	3.41799e+08	1.7776e+08	2.22382e+08	2.34884e+08	1.41655e+08	1.30038e+08	1.86582e+08	2.81053e+08	2.77098e+08	3.41799e+08	32	32	30	29	28	30	34	31
High	Q01518-2	Isoform 2 of Adenylyl cyclase-associated protein 1 [OS=Homo sapiens]	0	FALSE	352.044	60	25	410	1	474	51.8	8.06	1416.66	25	172.7	43.6	100.5	241.8	139.5	73.9	13.6	72	42.5	2.16316e+06	545661	1.25913e+06	3.02842e+06	1.74696e+06	925750	170019	902551	532600	1612769	493586	1.20212e+06	2.29189e+06	1.17392e+06	811388	120408	578987	532600	1	1	1	1	1	1	1	1
High	O43143	Pre-mRNA-splicing factor ATP-dependent RNA helicase DHX15 [OS=Homo sapiens]	0	FALSE	352.025	52	33	264	33	795	90.9	7.46	841.16	33	102.5	116.2	103.8	85.3	88.4	93.2	115.2	91.4	104	3.84315e+08	4.35602e+08	3.89319e+08	3.19946e+08	3.31299e+08	3.49334e+08	4.32119e+08	3.42889e+08	3.89998e+08	2.86531e+08	3.94031e+08	3.71693e+08	242132702	222625828	3.06179e+08	3.06027e+08	2.19964e+08	3.89998e+08	31	32	32	32	27	33	27	27
High	O43175	D-3-phosphoglycerate dehydrogenase [OS=Homo sapiens]	0	FALSE	351.154	63	26	269	26	533	56.6	6.71	1018.27	26	129.4	106.3	122.4	79.5	78	75.6	97.9	96.4	114.4	6.12894e+08	5.03438e+08	5.79547e+08	3.76463e+08	3.69364e+08	3.58084e+08	4.63745e+08	4.56485e+08	5.41841e+08	4.56951e+08	4.55392e+08	5.53308e+08	2.84905e+08	2.48205e+08	3.13848e+08	3.28426e+08	292835343	5.41841e+08	32	35	34	30	28	30	29	25
High	P31040	Succinate dehydrogenase [ubiquinone] flavoprotein subunit, mitochondrial [OS=Homo sapiens]	0	FALSE	350.14	64	25	183	25	664	72.6	7.39	651.43	25	101	101.6	112.6	124.8	123.4	104.1	76.5	88.1	67.9	184576494	1.85751e+08	2.05716e+08	2.28075e+08	2.25505e+08	1.9033e+08	1.3973e+08	1.60992e+08	1.24093e+08	1.37613e+08	1.68024e+08	1.96402e+08	1.72606e+08	1.51535e+08	166817775	9.89571e+07	1.03276e+08	1.24093e+08	28	27	31	30	26	27	29	23
High	Q9UBT2	SUMO-activating enzyme subunit 2 [OS=Homo sapiens]	0	FALSE	349.981	56	26	244	26	640	71.2	5.29	836.74	26	66.1	68.8	67.4	118.4	122.5	126.1	117.2	105.4	108.1	1.30812e+08	1.36232e+08	1.33483e+08	2.34471e+08	2.42609e+08	2.49791e+08	2.32153e+08	208654968	2.1413e+08	9.75283e+07	1.23231e+08	1.27439e+08	1.77446e+08	1.63028e+08	2.18933e+08	1.64411e+08	1.33852e+08	2.1413e+08	24	24	26	24	24	27	25	24
High	P48163	NADP-dependent malic enzyme [OS=Homo sapiens]	0	FALSE	349.307	72	22	170	22	572	64.1	6.13	700.07	22	141.1	142.6	145.1	126.9	107.1	109.3	37.5	42.5	47.8	6.7331e+07	6.80418e+07	6.921e+07	6.05471e+07	5.11005e+07	5.21627e+07	1.78801e+07	2.02516e+07	2.28133e+07	5.01995e+07	6.15482e+07	6.60765e+07	4.58216e+07	3.43385e+07	4.57188e+07	1.26627e+07	1.29914e+07	2.28133e+07	22	24	23	22	22	24	18	16
High	Q9UM54-1	Isoform 1 of Unconventional myosin-VI [OS=Homo sapiens]	0	FALSE	349.147	38	39	186	39	1285	148.6	8.53	606.52	39	89.6	95.7	87.8	189.1	184.1	172.2	30.1	28.9	22.4	1.48461e+08	1.58575e+08	1.45395e+08	3.13125e+08	3.04882e+08	2.85123e+08	4.99029e+07	4.79413e+07	3.71425e+07	1.10687e+08	1.43441e+08	1.38812e+08	2.36971e+08	2.04874e+08	2.49901e+08	3.53413e+07	3.07544e+07	3.71425e+07	38	38	39	37	35	39	23	25
High	O75153	Clustered mitochondria protein homolog [OS=Homo sapiens]	0	FALSE	348.871	39	33	192	33	1309	146.6	6.13	643.09	33	78.8	84.1	86.5	83.5	71	81.6	143.5	138	133	9.37209e+07	1.00018e+08	1.02825e+08	9.9295e+07	8.43728e+07	9.69883e+07	1.70607e+08	1.64083e+08	1.58168e+08	6.98748e+07	9.04727e+07	9.81699e+07	7.51458e+07	5.66968e+07	8.50068e+07	1.20824e+08	1.05259e+08	1.58168e+08	28	28	30	26	26	30	29	27
High	Q29RF7-1	Sister chromatid cohesion protein PDS5 homolog A [OS=Homo sapiens]	0	FALSE	348.388	41	36	243	34	1337	150.7	7.91	858.06	36	85.2	87.9	90	86	87	88	128.4	125.3	122.1	6.0891e+07	6.27982e+07	6.42794e+07	6.14554e+07	6.21902e+07	6.28835e+07	9.17509e+07	8.95228e+07	8.72385e+07	4.53981e+07	5.68051e+07	6.13692e+07	4.6509e+07	4.17905e+07	5.51152e+07	6.49782e+07	5.7429e+07	8.72385e+07	24	30	30	26	24	29	26	27
High	P33176	Kinesin-1 heavy chain [OS=Homo sapiens]	0	FALSE	347.507	49	34	192	34	963	109.6	6.51	745.32	34	114.1	123.2	114.9	95.6	115.1	98.1	89.4	83.6	65.9	1.73279e+08	1.87167e+08	1.74582e+08	1.4525e+08	1.74808e+08	1.48998e+08	1.35751e+08	1.27039e+08	1.00025e+08	1.2919e+08	1.69305e+08	1.66678e+08	1.09924e+08	1.17467e+08	1.30592e+08	9.6139e+07	8.14956e+07	1.00025e+08	27	29	27	29	31	28	26	27
High	P04181-1	Ornithine aminotransferase, mitochondrial [OS=Homo sapiens]	0	FALSE	347.391	80	25	190	25	439	48.5	7.03	658.8	25	138.5	140.3	131.4	24.4	23	25.7	147.3	140	129.3	3.84578e+08	389612844	3.64871e+08	6.76786e+07	6.38475e+07	7.13675e+07	4.08834e+08	3.88782e+08	3.58975e+08	2.86727e+08	3.5243e+08	3.48351e+08	5.12187e+07	4.29042e+07	6.25512e+07	2.89537e+08	2.49404e+08	3.58975e+08	29	29	28	21	17	23	28	29
High	P04083	annexin A1 [OS=Homo sapiens]	0	FALSE	347.005	70	25	340	25	346	38.7	7.02	1279.87	25	174.5	184.6	163.9	103	127.5	103.9	16.5	17	9.2	2164473827	2289419102	2032628925	1278229631	1581257785	1289413414	2.0506e+08	2.10452e+08	1.13715e+08	1613750951	2070928741	1940600717	9.67356e+08	1062572216	1130125852	1.45224e+08	1.35005e+08	1.13715e+08	25	25	25	25	25	25	20	22
High	P55209	Nucleosome assembly protein 1-like 1 [OS=Homo sapiens]	0	FALSE	346.91	65	17	280	15	391	45.3	4.46	949.07	17	76.5	90.5	81	73	73.3	78	172	128.9	126.8	2.40788e+08	2.84897e+08	2.54909e+08	2.29786e+08	2.30759e+08	2.45574e+08	5.41294e+08	4.05592e+08	3.99069e+08	1.79522e+08	2.57708e+08	2.43368e+08	1.73901e+08	1.55065e+08	2.15237e+08	3.83346e+08	2.60188e+08	3.99069e+08	15	14	16	13	16	16	14	15
High	Q15365	Poly(RC)-binding protein 1 [OS=Homo sapiens]	0	FALSE	346.474	83	15	233	13	356	37.5	7.09	875.65	15	87.1	84.2	81.7	97.9	104.3	97.3	113	126.4	108.1	3.63059e+08	3.50892e+08	3.40319e+08	4.07737e+08	4.345e+08	405534085	4.70953e+08	5.2684e+08	4.50294e+08	2.70684e+08	3.17405e+08	3.24911e+08	3.08572e+08	2.91975e+08	3.55436e+08	3.3353e+08	3.37968e+08	4.50294e+08	18	15	16	18	15	15	12	15
High	Q16658	Fascin [OS=Homo sapiens]	0	FALSE	345.804	70	26	250	26	493	54.5	7.24	859.66	26	168.6	164	144.7	0.9	1	1	136.3	164.8	118.7	8.50969e+08	8.28034e+08	7.30516e+08	4.57275e+06	5.05999e+06	5.20542e+06	6.88002e+08	8.31689e+08	5.9921e+08	6.3445e+08	7.4901e+08	6.97442e+08	3.46063e+06	3.40021e+06	4.56237e+06	4.87245e+08	5.33529e+08	5.9921e+08	26	27	24	8	7	7	26	25
High	P26641	elongation factor 1-gamma [OS=Homo sapiens]	0	FALSE	344.969	61	21	453	21	437	50.1	6.67	1457.52	21	104	97.8	97.2	92.3	88.4	80.7	115.7	124	99.9	1547639730	1455246700	1445836325	1373338525	1315316229	1199785198	1720863935	1843993657	1486545295	1153862456	1316365454	1380375422	1039333499	8.83865e+08	1051569849	1218720030	1182923170	1486545295	25	24	26	25	23	27	27	25
High	A0AVT1-1	Ubiquitin-like modifier-activating enzyme 6 [OS=Homo sapiens]	0	FALSE	344.537	47	32	204	32	1052	117.9	6.14	728.86	32	90.3	84.7	83.3	102.9	99.2	86.8	121.9	124.1	106.9	1.18441e+08	1.1109e+08	1.09304e+08	1.34952e+08	1.30154e+08	1.13883e+08	1.59936e+08	1.62786e+08	1.40309e+08	8.83049e+07	1.00488e+08	104354746	1.02131e+08	8.7461e+07	9.98146e+07	1.13267e+08	1.04427e+08	1.40309e+08	29	27	29	29	29	27	28	28
High	P54577	Tyrosine--tRNA ligase, cytoplasmic [OS=Homo sapiens]	0	FALSE	344.507	65	36	268	36	528	59.1	7.05	887.28	36	92.3	87.3	99.4	96.4	99.7	95.3	115.4	111.1	103	5.19428e+08	4.91613e+08	5.59483e+08	5.43021e+08	5.61461e+08	5.36607e+08	6.50004e+08	6.25651e+08	5.80116e+08	387266252	4.44696e+08	5.34152e+08	4.10955e+08	377290047	4.70317e+08	4.60334e+08	401355434	5.80116e+08	31	31	32	31	32	32	32	32
High	P25705-1	ATP synthase subunit alpha, mitochondrial [OS=Homo sapiens]	0	FALSE	343.919	63	31	420	31	553	59.7	9.13	1473.97	31	157	143.7	139.3	86.7	87.4	85.2	70.2	65.6	65	2579768862	2360023140	2287893670	1423910636	1435383562	1399386535	1152637084	1077515735	1067865142	1923379439	2134794694	2184308233	1077606138	9.64548e+08	1226513454	8.163e+08	691227068	1067865142	32	32	32	32	32	32	31	32
High	P52788-1	Spermine synthase [OS=Homo sapiens]	0	FALSE	341.519	70	19	150	19	366	41.2	5.02	588.1	19	79.9	79.4	93.1	92.6	69.8	96.3	132.3	107.2	149.3	9.3327e+07	9.2804e+07	1.08779e+08	1.08246e+08	8.15787e+07	1.12531e+08	1.54524e+08	1.25284e+08	1.7444e+08	6.95811e+07	8.39473e+07	103854445	8.19201e+07	5.48192e+07	9.86292e+07	1.09434e+08	8.03698e+07	1.7444e+08	19	21	21	21	19	20	19	21
High	Q8WUM4-2	Isoform 2 of Programmed cell death 6-interacting protein [OS=Homo sapiens]	0	FALSE	339.896	52	32	248	1	873	96.7	6.52	819.57	32	68.7	67.4	54.8	75.4	69.3	61.9	199.1	159.4	143.9	640688	628195	510933	703031	645939	576779	1.85549e+06	1.48593e+06	1.34164e+06	477673	568243	487800	532049	434057	505527	1314064	953224	1.34164e+06	1	1	1	1	1	1	1	1
High	P61221	ATP-binding cassette sub-family E member 1 [OS=Homo sapiens]	0	FALSE	339.541	52	23	208	23	599	67.3	8.34	751.31	23	99.5	97.5	101.3	89	92.4	86.9	127.7	112.2	93.5	2.5244e+08	2.47402e+08	2.57197e+08	2.25961e+08	2.34552e+08	2.20562e+08	3.24157e+08	284874373	2.37269e+08	1.8821e+08	2.23792e+08	2.45552e+08	1.71006e+08	1.57614e+08	1.93315e+08	2.29569e+08	1.82747e+08	2.37269e+08	27	24	26	24	26	25	27	26
High	O00468-6	Isoform 6 of Agrin [OS=Homo sapiens]	0	FALSE	339.033	37	44	110	44	2045	214.7	6.4	355.1	44	17.7	15.4	10.7	280.8	287.3	277.8	4.4	4.3	1.7	1.21768e+07	1.05773e+07	7.33911e+06	1.93353e+08	1.97833e+08	1.91313e+08	3.049e+06	2.98638e+06	1.19089e+06	9.07854e+06	9.56784e+06	7.00683e+06	146328595	132939817	167679523	2.15931e+06	1.91576e+06	1.19089e+06	5	2	3	35	33	34	1	5
High	P00505	Aspartate aminotransferase, mitochondrial [OS=Homo sapiens]	0	FALSE	338.538	70	24	227	24	430	47.5	9.01	866.62	24	87.1	86.5	87.5	86.7	79	85.5	118.6	123.6	145.5	4.46445e+08	4.4325e+08	4.48683e+08	444733229	4.04831e+08	4.38282e+08	6.08122e+08	6.33826e+08	7.45917e+08	3.32853e+08	4.00949e+08	4.28369e+08	3.36571e+08	2.72038e+08	3.84139e+08	4.30673e+08	4.066e+08	7.45917e+08	25	25	25	25	24	26	25	26
High	P09327	Villin-1 [OS=Homo sapiens]	0	FALSE	338.322	56	30	172	30	827	92.6	6.39	594.62	30	1.8	1	1.1	128	124.6	111.2	186.2	173.7	172.4	4.69745e+06	2.59567e+06	2.77599e+06	3.27545e+08	3.18935e+08	2.84601e+08	4.7642e+08	4.44562e+08	4.41066e+08	3.50224e+06	2.34795e+06	2.6503e+06	2.47884e+08	2.14318e+08	2.49443e+08	3.37402e+08	2.85187e+08	4.41066e+08	4	3	4	30	29	30	30	30
High	P05455	Lupus La protein [OS=Homo sapiens]	0	FALSE	338.242	62	29	306	29	408	46.8	7.12	1026.3	29	58.2	66.1	59.5	97.6	101.5	105.4	150	138.5	123.3	2.21247e+08	2.51083e+08	2.25913e+08	3.70992e+08	3.85516e+08	4.00298e+08	5.69731e+08	5.26023e+08	4.68493e+08	1.64953e+08	2.27121e+08	2.15684e+08	2.80764e+08	2.59059e+08	3.50848e+08	4.03485e+08	3.37444e+08	4.68493e+08	25	24	25	30	28	29	29	29
High	P60174-1	Isoform 2 of Triosephosphate isomerase [OS=Homo sapiens]	0	FALSE	338.226	89	21	561	21	249	26.7	6.9	1994.3	21	92.4	87.4	94.3	108.8	110.1	103.5	109.4	99.9	94.1	3654608855	3459726858	3732143300	4306879109	4357542564	4093804946	4330452157	3953115734	3722130344	2724740046	3129548356	3563168798	3259417583	2928177620	3588077146	3066836764	2535926400	3722130344	26	25	25	25	25	26	26	25
High	P54886	delta-1-pyrroline-5-carboxylate synthase [OS=Homo sapiens]	0	FALSE	338.084	51	28	280	28	795	87.2	7.12	977.82	28	102.7	94.1	97.3	96.8	96.2	105	91.3	98.8	117.8	2.66304e+08	2.44048e+08	2.52358e+08	2.512e+08	2.49641e+08	272450408	2.36696e+08	2.56254e+08	3.05467e+08	1.98546e+08	2.20757e+08	2.40932e+08	1.90107e+08	167753522	2.38793e+08	167628606	1.64387e+08	3.05467e+08	29	31	31	30	29	30	30	29
High	Q8WUM4	Programmed cell death 6-interacting protein [OS=Homo sapiens]	0	FALSE	337.677	52	32	253	1	868	96	6.52	827.71	32	129.7	108.5	92.5	76.9	83.3	81.5	120.4	110.2	96.9	2.31571e+07	1.93659e+07	1.65087e+07	1.37327e+07	1.48764e+07	1.45434e+07	2.14944e+07	1.96701e+07	17288396	17265100	17517704	15761237	10392830	9996643	12746804	15222358	12618397	17288396	1	1	1	1	1	1	1	1
High	P31150	Rab GDP dissociation inhibitor alpha [OS=Homo sapiens]	0	FALSE	336.634	64	22	235	14	447	50.6	5.14	988.92	22	140.1	150.1	161.5	119	120.5	117.7	33.5	24.3	33.2	6.86104e+07	7.35181e+07	7.90999e+07	5.8248e+07	5.90103e+07	5.76516e+07	1.64148e+07	1.18984e+07	1.62594e+07	5.11534e+07	6.65019e+07	7.55186e+07	4.40817e+07	3.96537e+07	5.05296e+07	1.1625e+07	7.63284e+06	1.62594e+07	14	15	15	14	15	15	8	9
High	P62937	peptidyl-prolyl cis-trans isomerase A [OS=Homo sapiens]	0	FALSE	336.581	75	13	732	1	165	18	7.81	2498.05	13	220.4	86.6	86.3	83.8	48.5	139.9	78.7	41.7	114.2	2.12426e+08	8.34826e+07	8.31599e+07	8.07572e+07	4.67321e+07	134826541	7.58106e+07	4.02021e+07	1.1007e+08	1.58377e+08	7.55155e+07	7.93947e+07	6.11165e+07	3.1403e+07	1.18171e+08	5.36893e+07	2.57897e+07	1.1007e+08	5	4	4	5	5	5	5	5
High	P38606	V-type proton ATPase catalytic subunit A [OS=Homo sapiens]	0	FALSE	336.244	66	27	219	27	617	68.3	5.52	790.95	27	84.6	84.4	86.9	108.3	112.5	114.1	108.2	90.9	110.2	1.43503e+08	1.43221e+08	1.473e+08	1.83613e+08	1.90806e+08	1.93555e+08	1.83439e+08	1.54092e+08	1.86808e+08	1.0699e+08	1.29553e+08	140631193	1.38957e+08	1.28217e+08	1.69644e+08	1.29912e+08	9.88504e+07	1.86808e+08	24	23	25	25	25	26	25	22
High	P54136-1	arginine--tRNA ligase, cytoplasmic [OS=Homo sapiens]	0	FALSE	334.816	66	39	262	39	660	75.3	6.68	840.68	39	106.3	101.5	99.7	107.5	109.1	122.1	85.1	81.4	87.2	358288546	3.4212e+08	3.36051e+08	362424151	3.67639e+08	4.11305e+08	2.86705e+08	274424592	2.93957e+08	2.67127e+08	3.0947e+08	3.20836e+08	2.7428e+08	2.47046e+08	3.60494e+08	2.03045e+08	1.76044e+08	2.93957e+08	35	35	36	36	32	37	31	31
High	Q99714-1	3-hydroxyacyl-CoA dehydrogenase type-2 [OS=Homo sapiens]	0	FALSE	334.681	89	16	266	16	261	26.9	7.78	1138.68	16	70.9	59.2	68.9	93.3	78.9	77.7	149.1	154.2	147.8	218875024	1.82594e+08	212589117	2.87762e+08	2.43544e+08	2.39764e+08	4.60131e+08	4.75881e+08	455936269	1.63185e+08	1.65168e+08	2.02964e+08	2.17777e+08	1.63657e+08	2.10145e+08	3.25866e+08	3.05278e+08	455936269	17	19	20	19	18	19	19	18
High	Q08J23	tRNA (Cytosine(34)-C(5))-methyltransferase [OS=Homo sapiens]	0	FALSE	333.14	55	29	185	29	767	86.4	6.77	638.45	29	48.8	42.8	47.8	83.4	89.2	92.5	160.8	158.3	176.4	7.69191e+07	6.74057e+07	7.52754e+07	131360597	1.40479e+08	1.45619e+08	2.53192e+08	2.49308e+08	2.77871e+08	5.7348e+07	6.09728e+07	7.18673e+07	9.94128e+07	9.43992e+07	1.2763e+08	1.79311e+08	159930992	2.77871e+08	24	25	25	23	24	29	28	29
High	P27695	DNA-(apurinic or apyrimidinic site) lyase [OS=Homo sapiens]	0	FALSE	331.697	70	18	165	18	318	35.5	8.12	721.02	18	111.5	108.8	101.1	65.5	59.9	58.3	152.7	130.8	111.5	2.59689e+08	253328175	2.35523e+08	1.52436e+08	1.39477e+08	1.35699e+08	3.5558e+08	3.04598e+08	259613830	193614694	2.29152e+08	2.2486e+08	1.15362e+08	9.37258e+07	1.18936e+08	2.51823e+08	1.954e+08	259613830	14	14	16	15	14	16	16	17
High	P12270	Nucleoprotein TPR [OS=Homo sapiens]	0	FALSE	330.908	24	44	220	44	2363	267.1	5.02	696.32	44	106.1	103.8	96.2	87.2	80.8	84	135.8	104.6	101.6	151590143	1.48311e+08	1.3742e+08	124547282	1.15465e+08	1.20082e+08	1.94016e+08	149446150	1.45133e+08	1.1302e+08	1.34157e+08	131198551	9.42566e+07	7.75897e+07	1.05247e+08	1.37402e+08	9.58698e+07	1.45133e+08	38	41	39	37	33	36	40	36
High	P09429	High mobility group protein B1 [OS=Homo sapiens]	0	FALSE	330.445	43	16	355	13	215	24.9	5.74	1344.36	16	74.9	113.8	80.6	128.7	128.2	121.3	90.2	83.4	78.9	1079310442	1638294342	1160913335	1853483698	1847058778	1746626402	1298554900	1201517182	1136373978	8.04694e+08	1481943973	1108352451	1402704186	1241184934	1530857077	9.1964e+08	7.70774e+08	1136373978	15	15	15	15	15	15	16	15
High	P00367	Glutamate dehydrogenase 1, mitochondrial [OS=Homo sapiens]	0	FALSE	329.342	57	25	197	25	558	61.4	7.8	752.12	25	78	97	96.4	97.2	89.8	109.3	115.8	91.2	125.3	1.84053e+08	2.28976e+08	2.2749e+08	2.29525e+08	2.1191e+08	2.58021e+08	2.73352e+08	2.15326e+08	2.95824e+08	1.37223e+08	2.07124e+08	2.17191e+08	1.73703e+08	1.42399e+08	2.26146e+08	1.93589e+08	1.38132e+08	2.95824e+08	23	24	22	22	22	23	24	22
High	Q9H0D6-1	5'-3' exoribonuclease 2 [OS=Homo sapiens]	0	FALSE	328.882	50	29	181	29	950	108.5	7.47	663.24	29	80.3	97.1	87.5	63.8	64.1	68.1	146.5	135.2	157.4	1.55092e+08	1.87528e+08	1.68967e+08	1.23316e+08	123819128	1.31583e+08	2.82978e+08	2.61251e+08	3.04005e+08	1.15631e+08	1.69631e+08	161317223	9.33249e+07	8.32039e+07	1.15328e+08	2.00405e+08	1.67593e+08	3.04005e+08	27	28	28	25	27	24	27	30
High	Q16531	DNA damage-binding protein 1 [OS=Homo sapiens]	0	FALSE	328.269	45	39	272	39	1140	126.9	5.26	887.74	39	125.7	121.1	119	80.4	86.5	77	98.9	101.8	89.6	443313343	4.27025e+08	4.19595e+08	283570045	304881878	2.71624e+08	3.48632e+08	359038510	3.15931e+08	3.30518e+08	3.86272e+08	4.00598e+08	2.14604e+08	2.04874e+08	238069384	2.46902e+08	2.30323e+08	3.15931e+08	38	37	40	35	37	36	36	34
High	sp		0	TRUE	327.456	75	13	772	1	164	17.9	7.81	2662.31	13	103.6	86.7	91.5	122.3	128.8	97.6	108.2	91.4	69.9	3.56908e+08	2.98655e+08	3.15269e+08	421338040	4.43871e+08	3.36233e+08	3.72677e+08	3.1499e+08	2.40876e+08	2.66097e+08	2.70153e+08	3.00995e+08	3.18866e+08	2.98272e+08	2.94696e+08	2.63931e+08	2.02066e+08	2.40876e+08	3	3	2	2	3	3	2	3
High	P23528	Cofilin-1 [OS=Homo sapiens]	0	FALSE	327.063	70	15	431	12	166	18.5	8.09	1668.8	15	70.8	78.3	69.7	125.2	142.2	135	104	88.2	86.5	1121659330	1239527459	1104211705	1982464013	2252630081	2137514265	1647349066	1397199684	1369936037	8.36267e+08	1121233346	1054218013	1500315634	1513720381	1873456646	1166656621	896304536	1369936037	16	15	15	16	16	17	15	14
High	P62136-1	serine/threonine-protein phosphatase PP1-alpha catalytic subunit [OS=Homo sapiens]	0	FALSE	327.013	70	21	247	5	330	37.5	6.33	893.9	21	113.9	92.2	93.9	100.8	110.3	101.5	99.8	105	82.7	5.15215e+07	4.17131e+07	4.24705e+07	4.55941e+07	4.99176e+07	4.59364e+07	4.51364e+07	4.75275e+07	3.7406e+07	3.84125e+07	3.77322e+07	4.05476e+07	3.45053e+07	3.35436e+07	4.02617e+07	3.19657e+07	3.04889e+07	3.7406e+07	4	4	4	4	4	3	3	4
High	P08758	annexin A5 [OS=Homo sapiens]	0	TRUE	325.403	78	24	329	24	320	35.9	5.05	1134.06	24	108.1	106.7	107.3	135.6	148.7	133.8	57.3	51.5	51.1	1088490738	1073706553	1079982407	1364829979	1496959998	1347260955	5.76529e+08	518461585	5.14478e+08	8.11538e+08	9.71238e+08	1031085708	1032894288	1005925863	1180827202	4.083e+08	3.32593e+08	5.14478e+08	24	27	27	28	27	28	26	22
High	O00571	ATP-dependent RNA helicase DDX3X [OS=Homo sapiens]	0	FALSE	324.808	60	34	324	33	662	73.2	7.18	1150.29	34	78.8	73.7	83.6	83.9	88.4	86.7	133	141.7	130.1	4.1062e+08	3.83769e+08	4.35707e+08	4.3716e+08	4.60575e+08	4.51848e+08	6.92986e+08	738487168	6.77765e+08	3.06143e+08	3.47144e+08	4.1598e+08	3.3084e+08	3.09497e+08	3.96029e+08	4.90774e+08	4.7374e+08	6.77765e+08	33	33	34	32	32	32	33	34
High	Q16881-1	Thioredoxin reductase 1, cytoplasmic [OS=Homo sapiens]	0	FALSE	324.683	55	22	178	21	649	70.9	7.39	711.72	22	87.8	84.4	85.9	142.7	147.8	138.7	72.5	72.7	67.5	1.14465e+08	1.09981e+08	1.12018e+08	1.86068e+08	1.926e+08	180812995	9.44593e+07	9.47979e+07	8.7959e+07	8.53407e+07	9.94854e+07	1.06946e+08	140815404	1.29423e+08	1.58476e+08	6.68963e+07	6.08129e+07	8.7959e+07	21	18	21	22	21	20	20	19
High	P18669	Phosphoglycerate mutase 1 [OS=Homo sapiens]	0	FALSE	323.788	77	18	374	11	254	28.8	7.18	1375.86	18	93.2	114.8	104	69.1	68.2	73.5	164.7	102.4	110.1	2.06719e+08	2.54524e+08	2.30737e+08	1.53279e+08	1.51134e+08	1.63065e+08	3.65164e+08	2.27104e+08	2.44173e+08	1.54122e+08	2.30234e+08	2.2029e+08	1.16e+08	1.01559e+08	142920459	2.5861e+08	1.45687e+08	2.44173e+08	11	11	11	9	9	10	11	9
High	O00429	Dynamin-1-like protein [OS=Homo sapiens]	0	FALSE	323.37	61	29	224	2	736	81.8	6.81	804.09	29	59.8	100.4	85	80.8	65.9	67.4	213.3	111.1	116.2	691578	1.16142e+06	983359	935013	761952	779570	2.46705e+06	1.28531e+06	1.34376e+06	515615	1050580	938837	707612	512016	683266	1747172	824527	1.34376e+06	1	1	1	1	1	1	1	1
High	Q27J81	Inverted formin-2 [OS=Homo sapiens]	0	FALSE	321.888	45	31	159	31	1249	135.5	5.38	602.7	31	22.7	17.1	25.5	162.3	150.8	109.9	129	161.6	121.2	1.74479e+07	1.31418e+07	1.96132e+07	124875147	1.16018e+08	8.45237e+07	9.92805e+07	1.24346e+08	9.32494e+07	1.30085e+07	1.18876e+07	1.87252e+07	9.45047e+07	7.79614e+07	7.4082e+07	7.03107e+07	7.97682e+07	9.32494e+07	14	16	17	24	25	25	25	23
High	Q9Y446	Plakophilin-3 [OS=Homo sapiens]	0	FALSE	320.642	42	21	234	21	797	87	9.32	869.42	21	89.7	97.3	89.1	114	121.7	115.6	99.8	96.5	76.3	5.67233e+07	6.15205e+07	5.6361e+07	7.2121e+07	7.69352e+07	7.30991e+07	6.31179e+07	6.10073e+07	4.82424e+07	4.22908e+07	5.56493e+07	5.38092e+07	54580661	5.16989e+07	6.40688e+07	4.47003e+07	3.91363e+07	4.82424e+07	23	24	21	23	23	23	23	22
High	O00429-4	Isoform 3 of Dynamin-1-like protein [OS=Homo sapiens]	0	FALSE	320.472	61	29	219	2	699	78.1	6.81	768.75	29
High	P49589-3	Isoform 3 of Cysteine--tRNA ligase, cytoplasmic [OS=Homo sapiens]	0	FALSE	318.744	47	35	249	2	831	94.6	6.83	742.62	35	143	69.4	115.5	143		143.8	145.2	140		1.08243e+06	525263	874187	1.08213e+06		1.08792e+06	1.09896e+06	1.05957e+06		807020	475134	834608	818948		953521	778286	679714		1	1	1	1		1	1	1
High	P68133	Actin, alpha skeletal muscle [OS=Homo sapiens]	0	FALSE	317.375	53	21	1383	1	377	42	5.39	3254.57	21	44.5	222.6	149.1	48.4	28.2	84.6	94.6	27.5	200.5	5.10058e+07	2.55161e+08	1.70957e+08	5.54995e+07	3.23414e+07	9.69822e+07	1.08438e+08	3.15651e+07	229922276	3.8028e+07	2.3081e+08	163217183	4.20017e+07	2.17328e+07	8.50015e+07	7.67959e+07	2.0249e+07	229922276	2	3	3	3	2	3	3	2
High	O00148	ATP-dependent RNA helicase DDX39A [OS=Homo sapiens]	0	FALSE	317.365	66	26	274	12	427	49.1	5.68	901.9	26	78.3	89	93.9	75.6	80.2	73.7	104	156.3	149	4.60864e+07	5.23474e+07	5.52642e+07	4.4483e+07	4.71646e+07	4.33768e+07	6.12047e+07	9.19804e+07	8.7655e+07	3.43603e+07	4.73517e+07	5.27621e+07	3.36644e+07	3.16936e+07	3.80183e+07	4.33454e+07	5.90055e+07	8.7655e+07	12	12	11	13	13	14	13	11
High	Q99613	Eukaryotic translation initiation factor 3 subunit C [OS=Homo sapiens]	0	FALSE	317.242	41	31	209	31	913	105.3	5.68	738.83	31	111.6	103.1	123.2	68	78.9	77.9	125.8	113.2	98.3	408629944	3.77598e+08	4.50913e+08	2.49021e+08	2.88678e+08	2.85362e+08	4.60661e+08	4.14295e+08	3.59831e+08	3.04659e+08	3.41562e+08	4.30498e+08	1.88457e+08	1.93986e+08	2.5011e+08	3.26242e+08	2.65771e+08	3.59831e+08	30	30	31	29	27	29	30	29
High	P62424	60S ribosomal protein L7a [OS=Homo sapiens]	0	FALSE	316.735	54	22	325	22	266	30	10.61	1111.28	22	106.8	103.4	106.7	94.6	102.6	88.2	90.5	113.7	93.5	1172588769	1135390721	1171170654	1038747505	1126642022	9.68778e+08	9.93106e+08	1248379434	1026671852	8.74238e+08	1027034882	1118145365	7.86117e+08	757079915	8.491e+08	7.0332e+08	8.00836e+08	1026671852	21	22	21	21	21	21	20	21
High	P49589-2	Isoform 2 of Cysteine--tRNA ligase, cytoplasmic [OS=Homo sapiens]	0	FALSE	316.488	54	34	244	1	726	82.8	7.02	731.57	34		145.4	139			131.4			484.2		508852	486536			459698			1694572		460290	464508			402909			1694572		1	1			1
High	Q14008	Cytoskeleton-associated protein 5 [OS=Homo sapiens]	0	FALSE	315.876	33	46	168	46	2032	225.4	7.8	544.69	46	87.8	98.1	84.1	82.6	82.6	80.3	126.1	128.1	130.3	8.40427e+07	9.39357e+07	8.0445e+07	7.9075e+07	7.90108e+07	7.6894e+07	1.2067e+08	1.22618e+08	1.2468e+08	6.26591e+07	8.4971e+07	7.68028e+07	5.98434e+07	5.30936e+07	6.73949e+07	8.54588e+07	78659721	1.2468e+08	35	38	36	37	36	37	38	40
High	Q9BSJ8	Extended synaptotagmin-1 [OS=Homo sapiens]	0	FALSE	315.705	37	27	216	27	1104	122.8	5.83	769.77	27	71.4	62.6	61.9	100.9	98.7	90.6	142.4	144	127.5	9.08976e+07	7.97527e+07	7.88507e+07	128593345	1.25765e+08	1.15408e+08	1.81362e+08	1.83449e+08	1.62408e+08	6.77699e+07	7.21415e+07	7.52807e+07	9.73186e+07	8.45111e+07	1.01151e+08	1.28441e+08	1.17682e+08	1.62408e+08	27	27	26	29	24	28	29	28
High	P06753-2	Isoform 2 of Tropomyosin alpha-3 chain [OS=Homo sapiens]	0	FALSE	315.638	60	25	366	11	248	29	4.78	1218.84	25	80.9	88.5	80.7	129.7	139.1	127.4	95.4	84.1	74.1	3.82422e+08	4.18358e+08	3.8155e+08	6.12832e+08	6.57539e+08	6.0228e+08	4.50668e+08	3.97267e+08	3.50407e+08	2.85119e+08	3.78432e+08	364275026	4.63787e+08	4.41852e+08	5.27878e+08	3.19164e+08	2.54847e+08	3.50407e+08	11	11	11	11	11	11	11	11
High	P36776	Lon protease homolog, mitochondrial [OS=Homo sapiens]	0	FALSE	315.302	45	30	211	30	959	106.4	6.39	719.07	30	115	81.6	115.4	71.8	74.7	67.7	119	136	118.7	289594500	2.05586e+08	2.90504e+08	1.80726e+08	188072167	1.70585e+08	2.99703e+08	3.42575e+08	2.98864e+08	2.15911e+08	1.85966e+08	2.77351e+08	1.36772e+08	1.26381e+08	1.49512e+08	212250688	2.19762e+08	2.98864e+08	30	30	29	27	25	31	32	31
High	P33991	DNA replication licensing factor MCM4 [OS=Homo sapiens]	0	FALSE	314.991	51	31	210	31	863	96.5	6.74	668.16	31	89.7	92.8	93.2	75.2	75.1	78.8	132.2	139.8	123.1	2.58124e+08	2.67043e+08	2.68231e+08	2.16274e+08	2.1618e+08	2.26789e+08	380530557	4.02405e+08	3.54155e+08	1.92447e+08	2.41558e+08	2.56087e+08	1.63675e+08	1.45268e+08	1.98773e+08	2.69493e+08	2.58143e+08	3.54155e+08	27	26	28	25	22	26	27	25
High	Q15084-1	Protein disulfide-isomerase A6 [OS=Homo sapiens]	0	FALSE	314.655	53	19	229	19	440	48.1	5.08	915.76	19	79.5	72.9	67.9	179.7	181.6	164.8	58.2	50.5	45	3.02566e+08	2.77185e+08	258155580	6.83472e+08	6.90639e+08	6.26884e+08	2.21435e+08	1.91998e+08	1.71215e+08	225581992	2.50732e+08	2.46467e+08	5.17247e+08	4.64095e+08	5.49442e+08	1.56821e+08	1.23167e+08	1.71215e+08	18	21	20	20	20	20	19	15
High	P04843	Dolichyl-diphosphooligosaccharide--protein glycosyltransferase subunit 1 [OS=Homo sapiens]	0	FALSE	314.479	54	26	268	26	607	68.5	6.38	993.9	26	91.4	86.9	81.2	135.6	131	124.2	90.4	87.5	71.8	5.4547e+08	5.18125e+08	4.84553e+08	8.0905e+08	7.81695e+08	7.40553e+08	5.39182e+08	5.21683e+08	4.28164e+08	4.06682e+08	4.68678e+08	4.62614e+08	6.12284e+08	5.25283e+08	6.49069e+08	3.8185e+08	3.3466e+08	4.28164e+08	26	26	27	26	25	26	27	26
High	sp P06396	Gelsolin [OS=Homo sapiens]	0	TRUE	313.666	44	20	149	20	782	85.6	6.28	553.13	20	134.9	117.8	116.7	145.3	181.6	125.4	24.8	31.6	21.9	1.40133e+08	1.22438e+08	1.21303e+08	1.50953e+08	1.88637e+08	1.30329e+08	2.57767e+07	3.28315e+07	2.27232e+07	1.04478e+08	1.10753e+08	1.15811e+08	1.1424e+08	1.2676e+08	1.14229e+08	1.82551e+07	2.10615e+07	2.27232e+07	20	21	21	19	21	21	14	12
High	P08865	40S ribosomal protein SA [OS=Homo sapiens]	0	FALSE	313.468	64	20	259	20	295	32.8	4.87	1012.7	20	108	108.3	105	96.3	95.2	96	98.4	95.8	96.8	1160894708	1164430359	1128989850	1035212147	1022994757	1032214959	1057727307	1029966302	1040436776	8.6552e+08	1053303126	1077874315	7.83442e+08	6.87431e+08	9.047e+08	7.49085e+08	6.60724e+08	1040436776	21	23	21	21	21	21	21	21
High	Q6XQN6-1	nicotinate phosphoribosyltransferase [OS=Homo sapiens]	0	FALSE	312.758	72	24	168	24	538	57.5	5.68	603.42	24	72.2	69.4	67.5	225.3	205.6	182.7	28.6	27.1	21.7	8.37385e+07	8.0402e+07	7.81989e+07	261164867	2.38336e+08	2.11745e+08	3.31637e+07	3.13662e+07	2.5106e+07	6.24323e+07	7.27289e+07	7.46584e+07	1.97648e+08	160157044	1.85587e+08	2.34866e+07	2.01215e+07	2.5106e+07	27	23	26	30	27	28	20	19
High	P07384	Calpain-1 catalytic subunit [OS=Homo sapiens]	0	FALSE	312.372	62	37	241	37	714	81.8	5.67	835.67	37	93.2	102.3	98.7	155	145.2	144.6	48.2	54	58.8	3.71259e+08	4.07444e+08	3.93079e+08	617295872	5.7854e+08	5.75883e+08	1.91955e+08	2.1527e+08	2.34231e+08	2.76796e+08	3.6856e+08	3.75283e+08	4.67165e+08	3.88767e+08	5.04741e+08	1.35943e+08	1.38096e+08	2.34231e+08	33	34	36	35	35	36	28	31
High	Q9HCC0-1	Methylcrotonoyl-CoA carboxylase beta chain, mitochondrial [OS=Homo sapiens]	0	FALSE	312.307	57	23	164	23	563	61.3	7.68	599.73	23	25.3	25.6	28	108.4	91.3	90	192.3	175.1	164	2.46822e+07	2.49217e+07	2.72664e+07	1.05542e+08	8.89206e+07	8.76203e+07	187285366	1.70555e+08	1.59688e+08	1.84021e+07	2.25433e+07	2.60319e+07	7.98733e+07	5.97528e+07	7.67961e+07	1.32636e+08	1.09411e+08	1.59688e+08	16	20	19	27	23	23	26	25
High	P30566	adenylosuccinate lyase [OS=Homo sapiens]	0	FALSE	311.425	64	21	182	21	484	54.9	7.11	715.77	21	99	106.2	116.9	46.3	42.1	54.4	134.9	144.2	156.1	9.93555e+07	1.06608e+08	1.17343e+08	4.64737e+07	4.22374e+07	5.45813e+07	1.35408e+08	1.44809e+08	1.56749e+08	7.40757e+07	9.64343e+07	1.1203e+08	3.5171e+07	2.83827e+07	4.78386e+07	9.58961e+07	9.2895e+07	1.56749e+08	18	19	19	17	18	18	19	19
High	P46060	Ran GTPase-activating protein 1 [OS=Homo sapiens]	0	FALSE	311.055	65	25	173	25	587	63.5	4.68	660.2	25	102.2	105.4	104.1	74.9	71.5	80.4	125.5	122.1	113.9	1.68969e+08	1.74249e+08	1.7203e+08	1.23715e+08	1.1814e+08	1.32953e+08	2.07381e+08	2.01811e+08	1.88197e+08	125976792	1.5762e+08	1.64241e+08	9.36268e+07	7.93875e+07	1.16528e+08	1.46868e+08	1.29462e+08	1.88197e+08	26	27	27	24	22	26	26	23
High	O75874	Isocitrate dehydrogenase [NADP] cytoplasmic [OS=Homo sapiens]	0	FALSE	310.445	60	22	215	21	414	46.6	7.01	687.81	22	58.1	67.5	54.1	212.3	185.6	194.8	42.9	38.3	46.4	1.43416e+08	1.66527e+08	1.33467e+08	5.24081e+08	458121933	4.80737e+08	105965921	9.45266e+07	1.14436e+08	1.06926e+08	1.50635e+08	1.27425e+08	3.96621e+08	3.07848e+08	4.21349e+08	7.50453e+07	6.06389e+07	1.14436e+08	17	19	20	22	19	22	16	16
High	P22695	Cytochrome b-c1 complex subunit 2, mitochondrial [OS=Homo sapiens]	0	FALSE	309.912	64	19	243	19	453	48.4	8.63	888.53	19	128.6	161.5	136.8	86.8	88.4	112	75.2	47.5	63.2	3.19371e+08	4.00998e+08	339793738	2.1554e+08	2.19612e+08	2.78159e+08	1.86685e+08	1.17913e+08	1.56827e+08	2.38111e+08	3.62729e+08	3.24409e+08	1.63119e+08	1.47575e+08	2.43797e+08	1.32211e+08	7.56415e+07	1.56827e+08	22	21	21	17	17	20	19	19
High	Q9P2E9-1	Ribosome-binding protein 1 [OS=Homo sapiens]	0	FALSE	308.007	35	34	185	34	1410	152.4	8.6	632.54	34	93.2	109.2	96.9	121.4	119.8	120.8	82	80.6	76.1	1.27655e+08	1.49614e+08	1.32801e+08	1.66348e+08	1.64185e+08	1.65499e+08	112406649	1.10376e+08	1.04278e+08	9.5175e+07	1.35336e+08	1.26788e+08	1.25891e+08	1.10329e+08	1.45054e+08	7.96067e+07	7.08063e+07	1.04278e+08	26	30	29	29	30	29	28	27
High	P98088	Mucin-5AC [OS=Homo sapiens]	0	FALSE	307.979	15	33	86	33	5654	585.2	7.02	295.72	33	2.1			218.2	325.4	354.1	0.3			574812			6.09077e+07	9.0835e+07	9.88476e+07	80362.5			428558			4.60946e+07	6.10392e+07	8.66364e+07	56912.9			1			29	29	30	1
High	Q96T76-1	MMS19 nucleotide excision repair protein homolog [OS=Homo sapiens]	0	FALSE	307.723	53	31	172	31	1030	113.2	6.35	634.55	31	131.5	113.3	123.2	98.7	88.9	86.1	83	97.9	77.4	7.44186e+07	6.41105e+07	6.97309e+07	5.58317e+07	5.03307e+07	4.87439e+07	4.69441e+07	5.53731e+07	4.37873e+07	5.54837e+07	5.79922e+07	6.65738e+07	4.22531e+07	3.38212e+07	4.27223e+07	3.32459e+07	3.55219e+07	4.37873e+07	26	26	26	22	22	24	22	22
High	Q99497	protein/nucleic acid deglycase DJ-1 [OS=Homo sapiens]	0	FALSE	307.621	78	14	327	14	189	19.9	6.79	1497.79	14	99.6	101.8	101.2	118.1	79.3	90.8	102.9	109.1	97.2	6.28532e+08	6.42372e+08	6.387e+08	7.45008e+08	5.00257e+08	5.72688e+08	6.49433e+08	6.88443e+08	6.12999e+08	468610114	5.81068e+08	6.09783e+08	5.63817e+08	336162188	5.01941e+08	4.5993e+08	441636406	6.12999e+08	16	21	21	17	13	21	15	14
High	P63010-1	AP-2 complex subunit beta [OS=Homo sapiens]	0	FALSE	307.554	41	34	223	18	937	104.5	5.38	722.57	34	124.9	114.2	115.9	94.7	93.2	94	82.5	91.1	89.6	1.11305e+08	1.01727e+08	1.03221e+08	8.43492e+07	83017378	8.37141e+07	7.35263e+07	8.11559e+07	7.98342e+07	8.29847e+07	9.20183e+07	9.85477e+07	6.38349e+07	5.57859e+07	7.33725e+07	5.20715e+07	5.20616e+07	7.98342e+07	17	20	20	18	16	19	16	16
High	P32119	Peroxiredoxin-2 [OS=Homo sapiens]	0	FALSE	307.323	83	19	277	18	198	21.9	5.97	989.15	19	121.2	112.3	102.8	89.1	88.9	79	108	107.3	91.3	6.96892e+08	6.45668e+08	5.90923e+08	5.12312e+08	5.11007e+08	4.53904e+08	6.21e+08	6.16955e+08	5.24795e+08	5.19577e+08	5.84049e+08	5.64169e+08	387714518	3.43386e+08	3.97831e+08	4.39794e+08	3.95777e+08	5.24795e+08	20	19	18	17	20	21	17	19
High	P22392-2	Isoform 3 of Nucleoside diphosphate kinase B [OS=Homo sapiens]	0	FALSE	307.069	81	19	396	7	267	30.1	8.92	1330.1	19	101.5	113.2	124.1	91.4	89.5	93.9	119.3	84.2	83	5.85943e+08	6.53538e+08	7.16804e+08	5.27692e+08	5.1713e+08	5.42049e+08	688743043	4.86077e+08	4.79468e+08	4.36857e+08	5.91168e+08	6.84351e+08	3.99354e+08	3.475e+08	4.75087e+08	4.8777e+08	3.11819e+08	4.79468e+08	9	8	8	8	9	8	9	8
High	Q8TEM1-1	Nuclear pore membrane glycoprotein 210 [OS=Homo sapiens]	0	FALSE	306.726	27	30	136	30	1887	205	6.81	448.93	30	126	125.7	118.3	65.3	64.3	72.9	112.6	101.6	113.3	1.2947e+08	1.29193e+08	1.21557e+08	6.71453e+07	6.60299e+07	7.49604e+07	1.15736e+08	1.04387e+08	1.16414e+08	9.65281e+07	1.16864e+08	1.16054e+08	5.08151e+07	4.43707e+07	6.57002e+07	8.19648e+07	6.69645e+07	1.16414e+08	28	30	26	26	24	24	29	24
High	P11940-1	Polyadenylate-binding protein 1 [OS=Homo sapiens]	0	FALSE	306.72	50	28	275	8	636	70.6	9.5	877.72	28	96.9	82	91.3	93.1	92.9	92.6	117.6	125	108.7	2.10111e+08	1.7775e+08	1.97899e+08	2.01776e+08	2.0149e+08	2.00805e+08	2.55015e+08	2.70948e+08	2.35729e+08	1.56651e+08	1.60787e+08	1.88939e+08	152702894	1.35397e+08	1.75998e+08	180602046	1.73814e+08	2.35729e+08	6	6	6	5	5	5	5	6
High	P49748-1	Very long-chain specific acyl-CoA dehydrogenase, mitochondrial [OS=Homo sapiens]	0	FALSE	306.627	59	32	226	32	655	70.3	8.75	805.15	32	85	71.9	69.9	85.5	86.7	71.1	133.6	149.1	147.1	2.92678e+08	2.47647e+08	2.40695e+08	294460982	2.98504e+08	2.44694e+08	4.60053e+08	5.13286e+08	5.06429e+08	2.1821e+08	2.24013e+08	2.29797e+08	2.22846e+08	2.00589e+08	214465337	3.2581e+08	3.29273e+08	5.06429e+08	31	34	33	32	29	31	32	32
High	Q68CZ2-1	Tensin-3 [OS=Homo sapiens]	0	FALSE	306.526	46	35	76	35	1445	155.2	6.81	282.59	35	21.5	20.1	11.6	42.3	40.9	39.5	259.5	227.4	237.2	1.44995e+07	1.35906e+07	7.83672e+06	2.85818e+07	2.76598e+07	2.6683e+07	1.75392e+08	153738957	1.60356e+08	1.08103e+07	1.22936e+07	7.48191e+06	2.16305e+07	1.85868e+07	2.33868e+07	124213044	9.86236e+07	1.60356e+08	5	7	9	16	14	18	33	29
High	Q9P258	Protein RCC2 [OS=Homo sapiens]	0	FALSE	306.298	62	28	279	28	522	56	8.78	963.85	28	76.4	72.7	75.1	99.4	102.8	90.9	132.3	139.5	111	5.27234e+08	5.01521e+08	5.18018e+08	6.85664e+08	7.09073e+08	6.2755e+08	9.13054e+08	9.62821e+08	7.65711e+08	3.93086e+08	4.53658e+08	4.94564e+08	518905941	4.76483e+08	5.50026e+08	6.46627e+08	6.1765e+08	7.65711e+08	27	30	30	29	28	29	29	28
High	P33993-1	DNA replication licensing factor MCM7 [OS=Homo sapiens]	0	FALSE	306.144	52	31	247	31	719	81.3	6.46	829.95	31	85.1	96.4	95	61	67	73.1	164.2	128.8	129.3	219311967	2.48594e+08	244902329	1.57203e+08	1.72743e+08	1.88493e+08	4.23294e+08	3.32103e+08	333203937	1.63511e+08	2.2487e+08	2.33814e+08	118970206	1.1608e+08	1.65208e+08	2.99778e+08	2.13044e+08	333203937	25	28	29	23	23	28	25	25
High	P61981	14-3-3 protein gamma [OS=Homo sapiens]	0	FALSE	305.512	64	15	619	11	247	28.3	4.89	2029.93	15	99.4	77.5	93.5	149	137.4	120.2	78.1	81.6	63.3	4.48653e+08	3.4974e+08	421734505	6.72207e+08	6.19754e+08	5.42126e+08	3.52209e+08	3.68282e+08	2.85628e+08	3.34499e+08	3.16363e+08	4.0264e+08	5.08721e+08	4.16461e+08	4.75154e+08	249435528	2.36253e+08	2.85628e+08	19	17	20	20	18	18	18	19
High	Q08945	FACT complex subunit SSRP1 [OS=Homo sapiens]	0	FALSE	304.664	39	24	206	24	709	81	6.87	701.28	24	132.3	111.9	115	54.9	69.7	64.6	129.1	122	100.4	376335039	3.18366e+08	327048930	1.56059e+08	1.98358e+08	1.8384e+08	3.67171e+08	3.47054e+08	2.85565e+08	2.80581e+08	2.87983e+08	3.12242e+08	1.18104e+08	133292745	1.61129e+08	2.60031e+08	2.22635e+08	2.85565e+08	25	23	23	24	25	23	24	25
High	P28340	DNA polymerase delta catalytic subunit [OS=Homo sapiens]	0	FALSE	303.798	49	34	137	33	1107	123.6	7.03	452.11	34	53.8	50.6	51.7	119.3	122.2	103.8	132.3	144.2	122.2	5.12934e+07	4.81796e+07	4.92238e+07	1.13646e+08	1.16386e+08	9.88516e+07	1.26086e+08	1.37432e+08	1.16384e+08	3.82424e+07	4.35816e+07	4.69951e+07	8.60064e+07	7.8209e+07	8.664e+07	8.92942e+07	8.81625e+07	1.16384e+08	21	31	29	28	28	28	29	27
High	P38919	Eukaryotic initiation factor 4A-III [OS=Homo sapiens]	0	FALSE	302.739	68	26	236	23	411	46.8	6.73	769.36	26	122.9	135.8	141.7	51.5	51.5	54.7	102	106.9	133	3.46263e+08	3.82645e+08	3.9925e+08	1.44971e+08	1.45074e+08	1.54006e+08	2.8736e+08	3.01308e+08	3.74794e+08	258160698	3.46128e+08	3.81174e+08	109713101	9.74864e+07	1.34981e+08	2.03509e+08	1.93289e+08	3.74794e+08	21	23	24	20	16	23	20	20
High	P08243-1	Asparagine synthetase [glutamine-hydrolyzing] [OS=Homo sapiens]	0	FALSE	302.547	52	25	214	25	561	64.3	6.86	718.74	25	133	101.5	156.9	53.5	54.9	73.6	104.5	109.7	112.5	6.91038e+08	5.27222e+08	8.15397e+08	2.77997e+08	2.85353e+08	3.82204e+08	5.43057e+08	5.69845e+08	5.84718e+08	515212035	4.76906e+08	7.7848e+08	2.10386e+08	1.91751e+08	3.34988e+08	3.84594e+08	3.65556e+08	5.84718e+08	26	29	28	25	22	27	26	23
High	Q9NY33	dipeptidyl peptidase 3 [OS=Homo sapiens]	0	FALSE	301.746	55	25	178	25	737	82.5	5.1	611.56	25	63.1	59.7	53.4	163.4	162.2	140.4	89.6	91.7	76.4	8.86269e+07	8.37788e+07	7.50152e+07	2.29334e+08	2.27743e+08	1.9712e+08	1.25788e+08	1.28768e+08	1.072e+08	6.60769e+07	7.57834e+07	7.16188e+07	1.73558e+08	1.53039e+08	1.72769e+08	8.90831e+07	8.26046e+07	1.072e+08	22	23	20	25	25	24	23	24
High	Q10567-3	Isoform C of AP-1 complex subunit beta-1 [OS=Homo sapiens]	0	FALSE	299.869	41	33	214	17	939	103.5	5.16	680.91	33	97.3	91.2	88.4	130.4	128.3	122.6	84.8	83.2	73.8	6.49288e+07	6.08263e+07	5.89723e+07	8.70277e+07	8.55976e+07	8.18114e+07	5.65539e+07	5.54965e+07	4.92268e+07	4.84085e+07	5.50213e+07	5.63023e+07	6.5862e+07	5.75198e+07	7.17048e+07	4.00516e+07	35601020	4.92268e+07	18	18	17	17	17	18	15	17
High	Q9H583	HEAT repeat-containing protein 1 [OS=Homo sapiens]	0	FALSE	299.214	29	38	148	38	2144	242.2	6.54	439.76	38	214.7	97.1	102.1	53.4	60.5	62.1	90.4	136.6	83.2	9.46631e+07	4.28331e+07	4.5005e+07	2.35367e+07	2.66726e+07	2.73768e+07	3.9865e+07	6.0253e+07	3.66769e+07	7.05772e+07	3.87453e+07	4.29674e+07	1.78124e+07	1.79234e+07	2.39948e+07	2.82325e+07	3.86523e+07	3.66769e+07	38	37	39	27	27	28	33	34
High	O15371	Eukaryotic translation initiation factor 3 subunit D [OS=Homo sapiens]	0	FALSE	298.997	57	24	190	24	548	63.9	6.05	730.76	24	112.6	126.9	137.9	66.2	66.9	75.3	99.1	110.6	104.5	2.2198e+08	2.50233e+08	271770973	1.30506e+08	131966849	1.48431e+08	1.95343e+08	2.1795e+08	2.06034e+08	1.655e+08	2.26352e+08	2.59466e+08	9.87662e+07	8.8679e+07	1.30095e+08	1.38343e+08	1.39815e+08	2.06034e+08	23	23	23	24	24	24	24	25
High	O00299	chloride intracellular channel protein 1 [OS=Homo sapiens]	0	FALSE	297.923	86	20	328	20	241	26.9	5.17	1158.53	20	77.5	74.4	78.6	118.1	129.6	110.1	103	119.8	89	6.2681e+08	6.01895e+08	6.35654e+08	9.55385e+08	1048170951	8.90207e+08	833258806	9.68655e+08	7.19898e+08	467325860	5.44453e+08	6.06874e+08	7.23029e+08	7.04349e+08	7.80236e+08	5.90116e+08	6.21393e+08	7.19898e+08	27	24	25	27	27	27	24	27
High	Q16891	MICOS complex subunit Mic60 [OS=Homo sapiens]	0	FALSE	297.063	47	26	225	26	758	83.6	6.48	792.35	26	88.2	95	93.9	95	97.3	98.8	122.1	106.2	103.5	1.63508e+08	1.76066e+08	1.73962e+08	1.76171e+08	1.80284e+08	1.83182e+08	2.26282e+08	1.96937e+08	1.91824e+08	1.21906e+08	159263140	1.66086e+08	1.33325e+08	1.21147e+08	160552912	1.60253e+08	1.26335e+08	1.91824e+08	23	23	24	24	23	24	23	24
High	Q02790	Peptidyl-prolyl cis-trans isomerase FKBP4 [OS=Homo sapiens]	0	FALSE	297.052	73	29	233	29	459	51.8	5.43	838.52	29	110.5	134.2	139.4	73.5	68.6	76.8	97.9	95.3	103.8	4.80671e+08	5.83935e+08	6.06754e+08	3.19818e+08	2.98657e+08	3.34148e+08	425909015	4.14829e+08	4.5186e+08	3.5837e+08	5.28207e+08	579282776	2.42036e+08	2.00692e+08	2.92869e+08	3.0163e+08	266112933	4.5186e+08	27	28	27	25	24	29	27	25
High	Q92896	Golgi apparatus protein 1 [OS=Homo sapiens]	0	FALSE	297.034	36	27	185	27	1179	134.5	6.9	693.67	27	113.1	147.2	106.9	114.9	112	109.3	70.5	61.5	64.6	163557540	212873032	1.54613e+08	1.66148e+08	1.61955e+08	1.58016e+08	1.0191e+08	8.89729e+07	9.33733e+07	1.21942e+08	1.92558e+08	147612413	1.2574e+08	1.08831e+08	138495843	7.21726e+07	5.70762e+07	9.33733e+07	24	27	27	24	25	26	22	19
High	P43686	26S proteasome regulatory subunit 6B [OS=Homo sapiens]	0	FALSE	297.016	80	25	237	25	418	47.3	5.21	827.17	25	108.7	101.3	110.5	81.3	90.4	82.1	107.2	113.8	104.6	2.14248e+08	1.99665e+08	2.17783e+08	1.60315e+08	1.78204e+08	1.61797e+08	211256511	2.24367e+08	206181407	1.59735e+08	1.8061e+08	2.07923e+08	1.21326e+08	1.19749e+08	1.4181e+08	1.49612e+08	1.43932e+08	206181407	26	28	28	25	26	27	26	26
High	O43795	Unconventional myosin-Ib [OS=Homo sapiens]	0	FALSE	297.01	34	26	133	26	1136	131.9	9.38	468.49	26	128.6	118.4	124.3	8.4	8.9	7	171.2	175.1	158.2	8.83734e+07	8.14054e+07	8.54267e+07	5.74904e+06	6.11946e+06	4.81698e+06	1.17697e+08	1.2034e+08	1.08755e+08	6.58879e+07	7.36365e+07	8.1559e+07	4.35084e+06	4.11215e+06	4.22192e+06	8.33535e+07	7.7198e+07	1.08755e+08	29	28	30	10	8	12	30	25
High	P05388	60S acidic ribosomal protein P0 [OS=Homo sapiens]	0	FALSE	296.545	45	15	251	15	317	34.3	5.97	1006.53	15	113.2	103.1	107.3	92.3	95.7	90.3	101.2	104.2	92.6	7.29959e+08	6.65305e+08	6.91844e+08	5.95665e+08	6.1762e+08	5.82731e+08	6.52608e+08	6.72473e+08	5.97411e+08	5.4423e+08	6.01812e+08	6.6052e+08	4.50795e+08	4.15027e+08	5.10744e+08	4.62179e+08	4.31392e+08	5.97411e+08	18	19	18	18	18	19	19	17
High	P06132	Uroporphyrinogen decarboxylase [OS=Homo sapiens]	0	FALSE	296.059	80	19	160	19	367	40.8	6.14	601.79	19	100.6	100.2	92.7	77.2	66.6	63.3	122.2	131.3	145.9	5.81434e+07	5.79358e+07	5.35819e+07	4.46066e+07	3.85288e+07	3.66081e+07	7.06648e+07	7.59355e+07	8.43444e+07	4.33496e+07	5.24067e+07	5.1156e+07	3.3758e+07	2.58905e+07	3.20857e+07	5.0045e+07	4.87127e+07	8.43444e+07	22	18	18	18	16	22	20	19
High	Q9NTK5-1	obg-like ATPase 1 [OS=Homo sapiens]	0	FALSE	295.891	67	22	222	22	396	44.7	7.81	813.35	22	105.4	104	102.2	84.7	77.2	84.5	115.6	117.7	108.7	3.24941e+08	3.20709e+08	3.15192e+08	2.60977e+08	2.38117e+08	2.6045e+08	3.56336e+08	3.62738e+08	3.35084e+08	2.42264e+08	2.90102e+08	3.00921e+08	1.97506e+08	1.6001e+08	2.28275e+08	2.52358e+08	2.32696e+08	3.35084e+08	21	22	22	21	19	20	20	21
High	P62140	Serine/threonine-protein phosphatase PP1-beta catalytic subunit [OS=Homo sapiens]	0	FALSE	295.728	76	19	221	7	327	37.2	6.19	788.83	19	113.4	111.8	112.3	95.4	88.1	95.2	94.1	81.7	108	6.29174e+07	6.20298e+07	6.22633e+07	5.2905e+07	4.88707e+07	5.27827e+07	5.22013e+07	4.53213e+07	5.98984e+07	4.69089e+07	5.611e+07	5.94443e+07	4.00382e+07	3.28401e+07	4.62622e+07	3.69691e+07	2.90737e+07	5.98984e+07	8	9	8	6	7	8	7	6
High	Q12905	Interleukin enhancer-binding factor 2 [OS=Homo sapiens]	0	FALSE	295.233	78	20	214	20	390	43	5.26	775.43	20	131.6	108.5	97.5	66.3	62.1	61.5	136	118.3	118.2	3.63395e+08	2.99507e+08	2.69213e+08	1.82945e+08	171309131	1.69666e+08	3.75362e+08	3.26682e+08	3.26358e+08	2.70934e+08	2.70923e+08	2.57024e+08	1.38451e+08	1.15116e+08	1.48706e+08	2.65832e+08	2.09567e+08	3.26358e+08	23	21	21	20	20	18	21	21
High	P36873-1	serine/threonine-protein phosphatase PP1-gamma catalytic subunit [OS=Homo sapiens]	0	FALSE	295.187	78	20	239	4	323	37	6.54	885.76	20	65.3	124.8	110.7	80.5	79	91.6	148.8	101.7	97.6	1.30239e+07	2.49035e+07	2.20791e+07	1.60593e+07	1.57508e+07	1.82784e+07	2.96755e+07	2.02956e+07	1.94589e+07	9.7101e+06	2.25268e+07	2.10795e+07	1.21536e+07	1.05842e+07	1.60204e+07	2.10163e+07	1.30196e+07	1.94589e+07	4	5	4	4	2	3	2	2
High	P49411	elongation factor Tu, mitochondrial [OS=Homo sapiens]	0	FALSE	294.736	74	28	256	28	452	49.5	7.61	893.34	28	130.7	121.9	129.5	85	89.1	88.3	89.9	79.5	86.2	8.96388e+08	8.35584e+08	8.87975e+08	5.82557e+08	6.11182e+08	6.05239e+08	6.16595e+08	5.45033e+08	5.91102e+08	6.68313e+08	7.5584e+08	8.47772e+08	4.40875e+08	4.10702e+08	5.30471e+08	4.36674e+08	3.49639e+08	5.91102e+08	30	29	30	28	28	29	27	27
High	O75390	citrate synthase, mitochondrial [OS=Homo sapiens]	0	FALSE	294.306	56	20	210	20	466	51.7	8.32	793.18	20	85.2	76.2	90	100.9	90.5	97.1	103.9	123	133.3	4.50191e+08	4.02945e+08	4.755e+08	533121999	4.78151e+08	5.13212e+08	549097293	6.50083e+08	7.04387e+08	3.35646e+08	3.6449e+08	4.53972e+08	4.03463e+08	3.21308e+08	4.49812e+08	3.88872e+08	4.17029e+08	7.04387e+08	22	21	21	21	18	22	19	19
High	P53618	Coatomer subunit beta [OS=Homo sapiens]	0	FALSE	294.264	42	26	231	26	953	107.1	6.05	825.8	26	71	90.4	79.5	127.7	125.9	131.1	103.8	76.4	94.2	1.23862e+08	1.57734e+08	1.3868e+08	2.22816e+08	2.1979e+08	2.28881e+08	1.81253e+08	1.33364e+08	1.64503e+08	9.23468e+07	1.42681e+08	1.32402e+08	1.68626e+08	1.47694e+08	2.00606e+08	1.28364e+08	8.5553e+07	1.64503e+08	24	26	25	25	24	25	24	23
High	P08195	4F2 cell-surface antigen heavy chain [OS=Homo sapiens]	0	FALSE	291.589	44	22	327	22	630	68	5.01	1137.39	22	98.3	84	96.6	92.9	97.3	101.5	110.4	115.6	103.4	5.56237e+08	4.75401e+08	5.46475e+08	525934434	5.50772e+08	5.74665e+08	624970472	654220168	5.85054e+08	4.14709e+08	4.30031e+08	521732690	398023696	3.70108e+08	5.03674e+08	4.42606e+08	4.19683e+08	5.85054e+08	24	23	21	21	23	23	23	23
High	P50454	Serpin H1 [OS=Homo sapiens]	0	FALSE	291.56	51	18	224	18	418	46.4	8.69	872.85	18	125.3	131	116.4	75	74	80	94.5	96.7	107.1	3.49873e+08	3.66058e+08	3.25055e+08	2.09527e+08	2.0683e+08	2.23553e+08	2.63844e+08	2.70059e+08	2.99244e+08	2.60852e+08	3.31124e+08	3.10338e+08	1.58569e+08	1.38986e+08	1.95936e+08	1.86855e+08	1.73243e+08	2.99244e+08	17	17	19	17	17	17	17	16
High	Q9H6R4-1	Nucleolar protein 6 [OS=Homo sapiens]	0	FALSE	290.788	36	22	167	22	1146	127.5	7.64	559.79	22	98.4	104.4	99.6	90.4	86.1	85.5	109.1	124.1	102.5	3.62754e+07	3.84997e+07	3.6728e+07	3.33457e+07	3.17513e+07	3.15333e+07	4.02218e+07	4.57628e+07	3.77833e+07	2.70456e+07	3.48255e+07	3.50651e+07	2.52358e+07	2.13362e+07	2.76379e+07	2.84852e+07	2.93569e+07	3.77833e+07	25	23	22	22	26	25	24	24
High	Q9NSE4	Isoleucine--tRNA ligase, mitochondrial [OS=Homo sapiens]	0	FALSE	290.699	44	28	223	28	1012	113.7	7.2	693.75	28	93.8	110.2	112.2	93.1	88.4	85.1	126.4	103.8	86.9	1.41395e+08	1.66092e+08	1.691e+08	1.40349e+08	1.33297e+08	128213465	1.90554e+08	1.56427e+08	1.30983e+08	1.05419e+08	1.50241e+08	1.61444e+08	1.06216e+08	8.95729e+07	112374627	1.34951e+08	1.00348e+08	1.30983e+08	27	29	30	29	25	29	26	26
High	Q8N1F7-1	Nuclear pore complex protein Nup93 [OS=Homo sapiens]	0	FALSE	290.691	51	33	183	33	819	93.4	5.72	570.31	33	96.3	110.6	116.5	74.4	82	89.7	111.1	96.6	122.7	8.95906e+07	1.02945e+08	1.08382e+08	6.92719e+07	7.62569e+07	8.34648e+07	1.03391e+08	8.99311e+07	1.14207e+08	6.67954e+07	9.31201e+07	1.03475e+08	5.24245e+07	5.1243e+07	7.3154e+07	7.32215e+07	5.76908e+07	1.14207e+08	32	33	31	28	30	30	32	32
High	P50851-2	Isoform 2 of Lipopolysaccharide-responsive and beige-like anchor protein [OS=Homo sapiens]	0	FALSE	289.166	18	30	157	1	2851	317.5	5.57	501.21	30	101.7	131.5	92.6	108.1	115.1	134.6	82.8	61.8	71.9	6.81238e+06	8.80424e+06	6.2006e+06	7.23828e+06	7.7069e+06	9.01708e+06	5.54563e+06	4.13764e+06	4.81697e+06	5.07906e+06	7.96401e+06	5.91986e+06	5.47789e+06	5.17888e+06	7.90316e+06	3.92743e+06	2.6543e+06	4.81697e+06	1	1	1	1	1	1	1	1
High	Q16555-1	Dihydropyrimidinase-related protein 2 [OS=Homo sapiens]	0	FALSE	288.782	68	26	96	23	572	62.3	6.38	352.32	26	48.4	57.5	49.5	42.7	44.2	37.6	221.7	168.8	229.7	4.62081e+07	5.49398e+07	4.72826e+07	4.07837e+07	4.2188e+07	3.59526e+07	2.11846e+08	1.61232e+08	2.1943e+08	3.44511e+07	4.96966e+07	4.51419e+07	3.08648e+07	2.83494e+07	3.15112e+07	1.5003e+08	1.0343e+08	2.1943e+08	11	13	14	12	10	11	20	17
High	P41091	eukaryotic translation initiation factor 2 subunit 3 [OS=Homo sapiens]	0	FALSE	288.781	62	22	198	22	472	51.1	8.4	688.13	22	100.5	91.1	97.4	77.9	79.2	77.4	128.6	130.6	117.3	3.80469e+08	3.44954e+08	3.6845e+08	2.94889e+08	2.99676e+08	2.9273e+08	4.8659e+08	4.94419e+08	4.43858e+08	2.83664e+08	3.12033e+08	3.51768e+08	2.2317e+08	2.01376e+08	2.56568e+08	3.44604e+08	3.1717e+08	4.43858e+08	22	23	22	20	19	21	20	20
High	P23588	eukaryotic translation initiation factor 4B [OS=Homo sapiens]	0	FALSE	288.642	31	16	202	16	611	69.1	5.73	827.92	16	94.3	86.9	110.2	68.6	62.1	53.7	121.8	165	137.4	2.1932e+08	2.02244e+08	2.56304e+08	159651226	1.44462e+08	1.24805e+08	2.83232e+08	3.83948e+08	3.19675e+08	1.63517e+08	1.82943e+08	2.44699e+08	1.20823e+08	9.70756e+07	1.09387e+08	2.00585e+08	2.46303e+08	3.19675e+08	21	19	20	19	19	21	19	18
High	P84077	ADP-ribosylation factor 1 [OS=Homo sapiens]	0	FALSE	288.456	87	16	202	3	181	20.7	6.8	803.81	16	90.1	101.8	76.7	153.6	150.1	83.6	55.6	112.3	76.2	1.50273e+07	1.69699e+07	1.2799e+07	2.56113e+07	2.50368e+07	1.39443e+07	9.26522e+06	1.87301e+07	1.27095e+07	1.12038e+07	1.53504e+07	1.22195e+07	1.93825e+07	1.68242e+07	1.22217e+07	6.56165e+06	1.20154e+07	1.27095e+07	4	4	5	4	3	4	3	4
High	P51991-2	Isoform 2 of Heterogeneous nuclear ribonucleoprotein A3 [OS=Homo sapiens]	0	FALSE	288.28	48	22	228	2	356	37	8.31	870	22	77.6	220.3	137.2	35.7	19.3	133.2	38.4		238.4	3.28875e+06	9.34066e+06	5.81739e+06	1.5141e+06	819664	5.64806e+06	1.62638e+06		1.01115e+07	2.45197e+06	8.44924e+06	5.55401e+06	1.14586e+06	550797	4.95033e+06	1.1518e+06		1.01115e+07	1	1	1	1	1	1	1
High	P49321	Nuclear autoantigenic sperm protein [OS=Homo sapiens]	0	FALSE	288.171	46	20	170	20	788	85.2	4.3	660.4	20	108.6	109.4	112.7	72.3	71.5	73.4	114.7	115.6	121.8	2.92597e+08	2.94798e+08	3.03753e+08	194803977	192650450	1.97779e+08	3.09113e+08	3.11556e+08	3.28371e+08	2.18149e+08	266663755	2.9e+08	1.47426e+08	129457080	1.73346e+08	218914753	1.99863e+08	3.28371e+08	16	14	16	17	15	17	16	16
High	P30048	Thioredoxin-dependent peroxide reductase, mitochondrial [OS=Homo sapiens]	0	FALSE	287.62	63	13	211	13	256	27.7	7.78	805.6	13	133	116.8	119.9	86.5	75.6	75.3	106.5	93.1	93.4	6.00347e+08	5.27144e+08	5.41253e+08	390296456	3.41188e+08	3.40024e+08	4.80951e+08	420065206	4.21406e+08	4.47596e+08	476836495	5.16748e+08	2.95374e+08	2.29271e+08	2.9802e+08	3.40611e+08	269472112	4.21406e+08	20	20	20	19	19	19	20	21
High	P00491	purine nucleoside phosphorylase [OS=Homo sapiens]	0	FALSE	287.101	76	20	212	20	289	32.1	6.95	747.72	20	94.3	99.2	102.1	119.5	100	97.3	85.8	94.6	107.2	1.59785e+08	168192215	1.72961e+08	2.02571e+08	1.69425e+08	1.64874e+08	1.45447e+08	1.60372e+08	1.81704e+08	1.1913e+08	1.52141e+08	1.6513e+08	1.53304e+08	113849983	1.44506e+08	1.03006e+08	1.02879e+08	1.81704e+08	20	21	21	19	18	21	17	15
High	O96008	Mitochondrial import receptor subunit TOM40 homolog [OS=Homo sapiens]	0	FALSE	286.319	62	15	181	15	361	37.9	7.25	829.72	15	77.2	126.9	108.8	99.5	101.4	98.2	78.4	101	108.5	8.29939e+07	1.36404e+08	1.16968e+08	1.06888e+08	108969407	1.05565e+08	8.43064e+07	1.08514e+08	1.16659e+08	6.18771e+07	1.23386e+08	1.11672e+08	8.08923e+07	7.32252e+07	9.25237e+07	5.9706e+07	6.96116e+07	1.16659e+08	17	17	20	16	17	15	17	15
High	P78344-1	Eukaryotic translation initiation factor 4 gamma 2 [OS=Homo sapiens]	0	FALSE	286.156	44	33	172	33	907	102.3	7.14	538.73	33	79.9	91.7	88.5	95.2	94.2	96.9	107.9	125.2	120.7	1.21569e+08	1.39538e+08	1.34719e+08	1.44863e+08	1.43381e+08	1.47441e+08	1.64203e+08	1.90623e+08	183763116	9.0637e+07	1.26221e+08	1.2862e+08	1.09631e+08	9.63493e+07	1.29227e+08	1.16289e+08	1.22285e+08	183763116	26	27	29	25	25	26	27	25
High	Q09161	Nuclear cap-binding protein subunit 1 [OS=Homo sapiens]	0	FALSE	285.761	50	24	157	24	790	91.8	6.43	519.06	24	82	89	78.6	97.1	96	92.5	118.3	122.3	124.1	5.5245e+07	5.99406e+07	5.29567e+07	6.53738e+07	6.46423e+07	6.2322e+07	7.96667e+07	8.23541e+07	8.36074e+07	41188581	5.42201e+07	5.0559e+07	4.94745e+07	4.34383e+07	5.4623e+07	5.64202e+07	5.28302e+07	8.36074e+07	23	23	25	24	21	24	21	21
High	Q13283	Ras GTPase-activating protein-binding protein 1 [OS=Homo sapiens]	0	FALSE	285.067	60	21	199	21	466	52.1	5.52	720	21	95.9	121.2	111.6	83.1	76.4	94.9	105.6	94.2	117	2.68723e+08	3.39732e+08	3.12737e+08	2.33054e+08	2.14207e+08	266145539	2.96123e+08	264189752	3.27962e+08	2.0035e+08	3.0731e+08	2.98577e+08	1.76374e+08	1.43942e+08	2.33267e+08	2.09715e+08	1.69478e+08	3.27962e+08	23	27	25	24	24	23	23	22
High	P39023	60S ribosomal protein L3 [OS=Homo sapiens]	0	FALSE	284.998	46	19	292	19	403	46.1	10.18	975.96	19	109.1	111.8	115.7	85.3	93.2	91.1	89.7	105.9	98.1	1155726147	1184925444	1226092498	9.04018e+08	987825407	9.65828e+08	9.50545e+08	1122438912	1039572532	8.61666e+08	1071842266	1170580597	684155148	6.63798e+08	846514660	6.73178e+08	7.20045e+08	1039572532	20	20	22	20	18	20	19	18
High	P05023	Sodium/potassium-transporting ATPase subunit alpha-1 [OS=Homo sapiens]	0	FALSE	284.561	40	33	255	21	1023	112.8	5.49	825.8	33	114.5	102.3	102.7	122	123.6	115.1	76.4	74.2	69.3	2.96047e+08	2.64572e+08	2.65611e+08	3.15521e+08	3.1956e+08	2.977e+08	1.9753e+08	1.91816e+08	1.79196e+08	2.20721e+08	2.39322e+08	2.53586e+08	2.38784e+08	214737789	2.60924e+08	1.39891e+08	1.2305e+08	1.79196e+08	21	22	21	20	20	20	20	18
High	P31947-1	14-3-3 protein sigma [OS=Homo sapiens]	0	FALSE	283.792	75	17	291	15	248	27.8	4.74	998.9	17	121.1	181	179.2	73.7	63.3	104.4	59	46.1	72.2	2.73988e+08	409371357	4.05371e+08	1.66638e+08	1.43171e+08	2.3625e+08	1.33353e+08	1.04375e+08	1.6326e+08	2.04275e+08	3.70303e+08	3.87018e+08	1.2611e+08	9.62082e+07	2.07064e+08	9.44407e+07	6.69566e+07	1.6326e+08	17	17	16	15	19	16	17	15
High	Q13310	Polyadenylate-binding protein 4 [OS=Homo sapiens]	0	FALSE	283.641	39	24	223	15	644	70.7	9.26	761.75	24	118.3	122.8	99.2	88.7	94.9	79.2	117.2	100.6	79	1.6632e+08	1.72654e+08	1.39418e+08	124705490	1.33323e+08	1.11381e+08	164723235	1.41366e+08	1.11029e+08	1.24002e+08	1.56177e+08	1.33106e+08	9.43763e+07	8.95905e+07	9.76212e+07	1.16657e+08	90686378	1.11029e+08	13	14	13	13	13	13	13	13
High	P35900 P35900	SWISS-PROT:P35900 Tax_Id=9606 Gene_Symbol=KRT20 Keratin, type I cytoskeletal 20 Keratin, type I cytoskeletal 20 [OS=Homo sapiens]	0	TRUE	283.573	71	27	129	24	424	48.5	5.69	459.89	27	1.3	1.8	2.4	287.4	310.7	290.4	1.7	1.3	2.9	3.60581e+06	4.84724e+06	6.33409e+06	7.69505e+08	8.31918e+08	7.77587e+08	4.67025e+06	3.4693e+06	7.81511e+06	2.68836e+06	4.38464e+06	6.04731e+06	5.82357e+08	5.59031e+08	6.81528e+08	3.30749e+06	2.22556e+06	7.81511e+06	4	3	3	24	23	24	2	2
High	P36871-1	Phosphoglucomutase-1 [OS=Homo sapiens]	0	FALSE	283.456	73	28	128	28	562	61.4	6.76	472.98	28	174.9	144.1	141.6	128.4	76.4	65.6	50.6	54.6	63.9	154590691	1.27379e+08	1.25201e+08	1.13483e+08	6.75216e+07	5.80021e+07	4.47213e+07	4.82988e+07	5.64513e+07	115257053	1.15223e+08	1.19532e+08	85883009	4.53731e+07	5.08368e+07	3.16717e+07	3.09837e+07	5.64513e+07	25	25	27	25	25	25	20	22
High	O43776	Asparagine--tRNA ligase, cytoplasmic [OS=Homo sapiens]	0	FALSE	283.299	57	26	218	26	548	62.9	6.25	748.95	26	126.1	122.3	129.5	113.7	108	106.6	72.5	62.5	58.8	3.71195e+08	3.60027e+08	3.81386e+08	334765555	3.17886e+08	3.1384e+08	2.13583e+08	1.83904e+08	1.73162e+08	2.76749e+08	3.25667e+08	3.64118e+08	2.53348e+08	2.13612e+08	2.7507e+08	151259688	1.17975e+08	1.73162e+08	26	26	26	26	26	24	23	20
High	P28331-1	NADH-ubiquinone oxidoreductase 75 kDa subunit, mitochondrial [OS=Homo sapiens]	0	FALSE	283.256	65	32	162	32	727	79.4	6.23	583.61	32	117.8	122.7	126.5	87.9	81	90.6	91.7	74.3	107.6	1.84849e+08	1.924e+08	1.98414e+08	1.37839e+08	127064693	1.42093e+08	1.43836e+08	1.16565e+08	168730296	1.37817e+08	1.74039e+08	1.89431e+08	1.04316e+08	8.53848e+07	1.2454e+08	1.01865e+08	7.47768e+07	168730296	28	29	29	26	24	27	26	25
High	P55265-1	Double-stranded RNA-specific adenosine deaminase [OS=Homo sapiens]	0	FALSE	282.884	33	30	132	3	1226	136	8.65	449.7	30	102.9	154.4	141.8	60.6	44.4	104.4	63.2	59.5	168.8	1.68764e+07	2.53234e+07	2.32612e+07	9.94281e+06	7.2867e+06	1.71192e+07	1.03593e+07	9.76299e+06	27678042	1.25824e+07	2.29067e+07	22208045	7524649	4.89651e+06	1.50044e+07	7.33651e+06	6.26297e+06	27678042	3	3	3	3	2	3	3	3
High	P50851-1	Lipopolysaccharide-responsive and beige-like anchor protein [OS=Homo sapiens]	0	FALSE	282.153	18	30	155	1	2863	318.9	5.6	495.1	30	77.6	134.5	110	94.1	126.4	110.6	116	63.5	67.2	848854	1.47082e+06	1.20313e+06	1.02897e+06	1.38253e+06	1.20899e+06	1.26824e+06	694235	735251	632874	1.33045e+06	1.14866e+06	778717	929031	1.05963e+06	898172	445352	735251	1	1	1	1	1	1	1	1
High	Q14573	Inositol 1,4,5-trisphosphate receptor type 3 [OS=Homo sapiens]	0	FALSE	281.75	21	38	192	33	2671	303.9	6.48	583.28	38	113	109	113.1	142.6	146.5	156.4	35.8	36.5	47.1	8.39968e+07	8.10074e+07	8.40432e+07	105992046	1.08854e+08	1.16272e+08	2.65956e+07	2.71153e+07	3.50385e+07	6.26249e+07	7.32764e+07	8.02381e+07	8.02141e+07	7.31474e+07	1.01909e+08	1.88351e+07	1.73945e+07	3.50385e+07	27	28	30	31	28	31	19	19
High	Q13724	Mannosyl-oligosaccharide glucosidase [OS=Homo sapiens]	0	FALSE	281.604	53	25	181	25	837	91.9	8.9	592.13	25	98.8	102.1	93.8	128.5	116.6	103.8	92.6	86.5	77.4	1.13682e+08	1.17488e+08	1.07978e+08	1.47941e+08	1.34223e+08	119515160	1.06611e+08	9.95566e+07	8.90802e+07	8.47573e+07	1.06276e+08	1.0309e+08	1.11961e+08	9.01948e+07	1.04751e+08	7.55022e+07	6.38656e+07	8.90802e+07	28	27	27	26	25	27	25	25
High	Q9UNM6	26S proteasome non-ATPase regulatory subunit 13 [OS=Homo sapiens]	0	FALSE	281.35	74	25	210	25	376	42.9	5.81	719.73	25	104.3	104.2	103.5	84.6	90.3	85.7	112.5	115.9	99	2.04337e+08	2.04152e+08	2.0281e+08	165692911	1.76942e+08	1.67877e+08	2.20305e+08	2.26972e+08	1.93856e+08	1.52346e+08	1.84669e+08	1.93627e+08	1.25395e+08	1.18901e+08	1.47138e+08	1.5602e+08	1.45603e+08	1.93856e+08	25	25	26	24	22	26	23	23
High	Q5JPE7	NODAL modulator 2 [OS=Homo sapiens]	0	FALSE	280.498	43	29	156	2	1267	139.4	5.76	501.88	29	73.7	166.8	125.9	65.6	62.3	105	116.9	94.1	89.5	2.3254e+06	5.26297e+06	3.97258e+06	2.07009e+06	1.96558e+06	3.31275e+06	3.68853e+06	2.96942e+06	2.82319e+06	1.73374e+06	4760699	3.79272e+06	1.56663e+06	1.32083e+06	2.90351e+06	2.61223e+06	1.90488e+06	2.82319e+06	2	3	3	2	2	3	3	3
High	P32322	Pyrroline-5-carboxylate reductase 1, mitochondrial [OS=Homo sapiens]	0	FALSE	280.306	79	18	225	17	319	33.3	7.61	829.32	18	138.9	141.9	137.6	50.7	51	54.6	103.4	94.6	127.2	2.84143e+08	2.90253e+08	2.8154e+08	103734768	1.04217e+08	1.11772e+08	2.11555e+08	1.93599e+08	2.60102e+08	2.11847e+08	2.62553e+08	2.68793e+08	7.85058e+07	7.00315e+07	9.79646e+07	1.49824e+08	124193907	2.60102e+08	17	19	20	17	14	18	18	13
High	Q99873-4	Isoform 4 of Protein arginine N-methyltransferase 1 [OS=Homo sapiens]	0	FALSE	280.162	77	23	274	23	353	40.5	5.5	919.08	23	121.3	125.7	117	93.7	95	87.1	99	84.5	76.6	4.25298e+08	4.40414e+08	410256436	3.28272e+08	3.3295e+08	3.05418e+08	3.47079e+08	2.96239e+08	2.68555e+08	3.17086e+08	3.98383e+08	3.91682e+08	2.48434e+08	2.23736e+08	2.67688e+08	2.45802e+08	1.90038e+08	2.68555e+08	23	25	25	23	21	25	22	23
High	O76003	glutaredoxin-3 [OS=Homo sapiens]	0	FALSE	279.779	76	20	140	20	335	37.4	5.39	526.1	20	50.5	57.2	60.8	86.6	88.3	102.4	161.9	140.9	151.4	5.78316e+07	6.55162e+07	6.96418e+07	9.91409e+07	1.01143e+08	1.17183e+08	185336200	161260614	1.73341e+08	4.3117e+07	5.92637e+07	6.64888e+07	7.50292e+07	6.79659e+07	1.02706e+08	1.31256e+08	1.03449e+08	1.73341e+08	17	17	17	19	21	22	21	20
High	P46013	Proliferation marker protein Ki-67 [OS=Homo sapiens]	0	FALSE	279.26	21	43	139	43	3256	358.5	9.45	390.51	43	115.5	132.8	140.2	56.4	59.7	54	113.4	119.5	108.6	9.20031e+07	1.05805e+08	1.11714e+08	4.49094e+07	4.75438e+07	4.30466e+07	9.03455e+07	9.51967e+07	8.65405e+07	6.85941e+07	9.57076e+07	1.06656e+08	3.39872e+07	3.19484e+07	3.77288e+07	6.39829e+07	6.10688e+07	8.65405e+07	35	38	38	30	26	31	35	32
High	Q15366-3	Isoform 3 of Poly(rC)-binding protein 2 [OS=Homo sapiens]	0	FALSE	278.812	82	14	296	0	362	38.2	6.79	1018.17	14
High	Q15437	protein transport protein Sec23B [OS=Homo sapiens]	0	FALSE	278.261	48	23	158	20	767	86.4	6.89	568.51	23	66.3	74.4	72.7	113.7	113.5	119.6	120.5	105.8	113.5	5.46262e+07	6.13743e+07	5.99761e+07	9.37554e+07	9.35964e+07	9.85628e+07	9.93069e+07	8.72319e+07	9.35564e+07	4.07272e+07	5.55171e+07	5.72607e+07	7.09535e+07	6.28948e+07	8.63868e+07	7.03294e+07	5.59593e+07	9.35564e+07	17	18	16	18	17	19	19	17
High	Q9BXP5	serrate RNA effector molecule homolog [OS=Homo sapiens]	0	FALSE	277.892	39	29	160	29	876	100.6	5.96	493	29	80.4	81.5	83.9	75.6	82.7	75.9	136.8	154.6	128.6	169746277	1.72082e+08	1.77207e+08	1.59621e+08	1.74622e+08	1.60214e+08	2.88736e+08	3.26291e+08	2.7151e+08	1.26556e+08	1.5566e+08	1.69184e+08	1.208e+08	1.17342e+08	1.40422e+08	2.04483e+08	2.09316e+08	2.7151e+08	28	29	28	27	27	27	28	29
High	P17174	Aspartate aminotransferase, cytoplasmic [OS=Homo sapiens]	0	FALSE	277.655	73	22	198	22	413	46.2	7.01	742.57	22	163.9	142.3	145.1	85	86.7	75.3	66.7	73.8	61.1	5.27446e+08	4.58064e+08	4.67012e+08	2.73362e+08	2.78938e+08	2.42463e+08	2.14731e+08	2.37377e+08	1.96717e+08	3.93244e+08	4.14349e+08	445867529	2.06879e+08	1.87441e+08	2.12511e+08	152073171	1.52278e+08	1.96717e+08	25	23	25	22	23	22	24	24
High	Q93008-1	Isoform 2 of Probable ubiquitin carboxyl-terminal hydrolase FAF-X [OS=Homo sapiens]	0	FALSE	277.339	23	36	128	26	2554	290.3	5.8	423.21	36	74.8	81.6	79.3	90.3	89.3	85.4	136.5	127.2	135.5	2.38506e+07	2.60149e+07	2.52779e+07	2.87635e+07	2.84467e+07	2.72181e+07	4.35058e+07	40543327	4.318e+07	1.77821e+07	2.35322e+07	2.41335e+07	2.1768e+07	1.91156e+07	2.38557e+07	3.08109e+07	2.60086e+07	4.318e+07	17	17	19	20	17	18	18	19
High	P78417	Glutathione S-transferase omega-1 [OS=Homo sapiens]	0	FALSE	276.809	83	23	230	23	241	27.5	6.6	640.1	23	121.4	110.1	117.3	124.6	115.9	116.5	61.7	66.5	66	4.80922e+08	4.36158e+08	4.64737e+08	4.93422e+08	4.5897e+08	461297608	2.44212e+08	263452066	2.61417e+08	3.58557e+08	3.94534e+08	4.43696e+08	3.73418e+08	3.08418e+08	4.04311e+08	1.72952e+08	1.69005e+08	2.61417e+08	26	25	26	26	24	25	26	25
High	P46782	40S ribosomal protein S5 [OS=Homo sapiens]	0	FALSE	276.802	55	12	226	12	204	22.9	9.72	935.49	12	114.5	101.3	90.5	90.6	106.5	101.1	100.7	105.2	89.5	4.2621e+08	3.76934e+08	3.36805e+08	3.37122e+08	3.96186e+08	376259073	3.74834e+08	3.91418e+08	333160180	3.17766e+08	3.40962e+08	3.21556e+08	2.55131e+08	2.66229e+08	3.29778e+08	2.65459e+08	2.51095e+08	333160180	13	14	14	15	13	15	13	13
High	Q8WUM0	Nuclear pore complex protein Nup133 [OS=Homo sapiens]	0	FALSE	276.298	34	26	155	26	1156	128.9	5.1	555.68	26	98.1	100.9	99.4	95.5	93	78.4	127.7	113.7	93.4	5.43224e+07	5.59018e+07	5.50352e+07	5.29188e+07	5.15114e+07	4.34208e+07	7.07218e+07	6.2958e+07	5.17118e+07	4.05007e+07	5.05668e+07	5.25435e+07	4.00486e+07	3.46146e+07	3.80568e+07	5.00854e+07	4.03876e+07	5.17118e+07	23	23	23	24	21	23	22	21
High	Q08380	Galectin-3-binding protein [OS=Homo sapiens]	0	FALSE	276.173	42	17	228	17	585	65.3	5.27	825.39	17	19.3	20.4	16.2	211.5	211.9	214.4	81.8	64.8	59.6	7.31882e+07	7.73422e+07	6.13181e+07	8.0038e+08	8.01689e+08	8.11172e+08	3.09537e+08	2.45135e+08	2.2566e+08	5.45664e+07	6.99611e+07	5.85419e+07	6.05722e+08	5.38719e+08	7.10964e+08	2.19215e+08	1.57254e+08	2.2566e+08	16	16	17	18	19	19	18	18
High	Q5JTH9-1	RRP12-like protein [OS=Homo sapiens]	0	FALSE	276.042	37	32	191	32	1297	143.6	8.75	656.39	32	95.6	79.7	100.3	103	110.7	91.8	86.1	137.4	95.5	1.25446e+08	1.04491e+08	1.31504e+08	1.35065e+08	1.45195e+08	1.20375e+08	1.12933e+08	1.80292e+08	1.25261e+08	9.35278e+07	9.45188e+07	125550450	1.02217e+08	9.7568e+07	1.05505e+08	7.99792e+07	1.15657e+08	1.25261e+08	26	28	29	30	27	30	30	30
High	P51991-1	Heterogeneous nuclear ribonucleoprotein A3 [OS=Homo sapiens]	0	FALSE	275.245	46	22	229	2	378	39.6	9.01	870.45	22	103	142.9	136.6	78.6	69.2	87.6	76.2	72.7	133.1	2.69705e+07	3.73989e+07	3.57602e+07	2.05727e+07	1.81265e+07	2.29436e+07	1.9941e+07	1.90417e+07	34850439	2.01082e+07	33829727	34141119	1.55693e+07	1.21807e+07	2.01093e+07	1.41222e+07	1.22152e+07	34850439	2	2	2	2	1	2	2	1
High	Q16576-1	Histone-binding protein RBBP7 [OS=Homo sapiens]	0	FALSE	274.384	69	16	164	12	425	47.8	5.05	676.02	16	58.4	91	121.6	71.6	52.8	67.4	187.3	110.7	139.1	7.13273e+07	1.11131e+08	1.48407e+08	8.74456e+07	6.44986e+07	8.22668e+07	2.2868e+08	1.35129e+08	1.69881e+08	5.3179e+07	1.00526e+08	1.41687e+08	6.61783e+07	4.33417e+07	7.2104e+07	1.61952e+08	8.66853e+07	1.69881e+08	12	11	12	13	13	13	12	13
High	Q9H6S3	epidermal growth factor receptor kinase substrate 8-like protein 2 [OS=Homo sapiens]	0	FALSE	274.237	48	24	135	24	715	80.6	6.84	526.47	24	62.7	54.7	54.9	198.4	185.2	177.1	58.5	57.7	50.9	5.35651e+07	4.67443e+07	4.69302e+07	1.69645e+08	1.58343e+08	1.51404e+08	4.99978e+07	49312849	4.34961e+07	3.99361e+07	4.22832e+07	4.48054e+07	128386465	1.06403e+08	1.327e+08	3.54086e+07	3.16342e+07	4.34961e+07	19	21	19	23	22	20	22	19
High	Q96TA1	Niban-like protein 1 [OS=Homo sapiens]	0	FALSE	273.421	49	22	149	22	746	84.1	6.19	537.68	22	60	58	59.7	197.5	191.1	202.2	41.3	43.1	47.1	8.7766e+07	8.48206e+07	8.73336e+07	2.88877e+08	2.79454e+08	2.95676e+08	6.03499e+07	6.30824e+07	6.88143e+07	6.5435e+07	7.67258e+07	8.33796e+07	2.1862e+08	1.87787e+08	2.5915e+08	4.27399e+07	4.04674e+07	6.88143e+07	16	17	16	18	17	17	15	13
High	Q13045-1	protein flightless-1 homolog [OS=Homo sapiens]	0	FALSE	272.992	46	36	173	36	1269	144.7	6.05	580.53	36	82.3	75.1	82.1	135	142.5	130.5	81.3	88.7	82.3	9.16304e+07	8.36782e+07	9.14283e+07	1.5039e+08	1.58715e+08	1.45305e+08	9.05701e+07	9.8817e+07	9.17032e+07	6.83162e+07	7.56924e+07	8.72889e+07	1.13814e+08	1.06653e+08	1.27355e+08	6.4142e+07	6.33912e+07	9.17032e+07	29	32	30	35	34	35	30	30
High	P11387	DNA topoisomerase 1 [OS=Homo sapiens]	0	FALSE	272.028	37	28	216	28	765	90.7	9.31	748.08	28	139.5	130.2	129.7	71.9	75.3	83.3	86.9	92.7	90.6	4.98834e+08	4.65357e+08	4.63622e+08	2.57104e+08	2.69326e+08	297678944	3.10572e+08	3.3149e+08	3.23828e+08	371912309	4.20946e+08	442631397	1.94575e+08	1.80982e+08	2.60905e+08	2.19948e+08	2.12651e+08	3.23828e+08	27	27	27	26	24	27	26	21
High	P26196	Probable ATP-dependent RNA helicase DDX6 [OS=Homo sapiens]	0	FALSE	271.193	64	20	150	20	483	54.4	8.66	509.3	20	90.3	114.8	97.8	85.2	79.6	76.4	134	100.3	121.7	1.22545e+08	1.55807e+08	132757871	115675729	1.08026e+08	103738809	1.81969e+08	1.36173e+08	1.65198e+08	9.13653e+07	1.40937e+08	1.26747e+08	8.75426e+07	7.25912e+07	9.09234e+07	1.28871e+08	8.73551e+07	1.65198e+08	18	20	20	19	17	18	19	18
High	O75592-1	E3 ubiquitin-protein ligase MYCBP2 [OS=Homo sapiens]	0	FALSE	271.164	11	26	87	26	4640	509.8	7.03	284.01	26	50	30.4	56.4	55.5	58	41.3	241.7	196	170.6	5.59905e+06	3.40624e+06	6.31659e+06	6.2087e+06	6.49242e+06	4.62501e+06	2.70551e+07	2.19359e+07	1.90962e+07	4.17444e+06	3.08116e+06	6.0306e+06	4.69871e+06	4.36277e+06	4.05366e+06	1.91605e+07	1.40719e+07	1.90962e+07	15	14	17	15	19	15	21	23
High	P35232	Prohibitin [OS=Homo sapiens]	0	FALSE	270.941	79	18	475	18	272	29.8	5.76	1802.77	18	124.7	108.5	113.4	68.5	73.7	67.3	130.5	119.5	93.9	1204223579	1047661333	1095024722	6.61195e+08	7.1159e+08	649656223	1260338605	1153939607	9.06625e+08	8.97824e+08	9.47678e+08	1045446974	5.00388e+08	4.78174e+08	5.69401e+08	8.92575e+08	7.40253e+08	9.06625e+08	21	22	21	21	20	20	20	20
High	Q02218	2-oxoglutarate dehydrogenase, mitochondrial [OS=Homo sapiens]	0	FALSE	270.559	44	31	218	22	1023	115.9	6.86	678.82	31	87.5	87.9	85	111.6	115	110.7	105.5	99.3	97.3	1.14826e+08	1.15397e+08	1.11556e+08	1.46511e+08	1.50981e+08	1.45257e+08	1.38493e+08	1.30376e+08	1.27691e+08	8.56103e+07	1.04384e+08	1.06505e+08	110878458	1.01456e+08	1.27313e+08	9.80812e+07	8.36364e+07	1.27691e+08	19	22	21	19	20	23	20	18
High	Q6UB35-1	Monofunctional C1-tetrahydrofolate synthase, mitochondrial [OS=Homo sapiens]	0	FALSE	270.505	47	26	148	26	978	105.7	8.06	532.21	26	104.8	103.9	107	39.6	41.3	45.7	159.3	150.6	147.8	1.09125e+08	1.08213e+08	1.11465e+08	4.11944e+07	4.29643e+07	4.75828e+07	1.65912e+08	1.56764e+08	1.53913e+08	8.13599e+07	9.7886e+07	1.06418e+08	3.11757e+07	2.88711e+07	4.17047e+07	1.175e+08	100564264	1.53913e+08	24	25	25	16	17	21	24	24
High	Q8NBS9-1	Thioredoxin domain-containing protein 5 [OS=Homo sapiens]	0	FALSE	270.49	63	20	186	20	432	47.6	5.97	643.81	20	101.3	112.8	113.8	108.2	106.6	110.2	89.5	83.9	73.8	3.88891e+08	4.32818e+08	4.36668e+08	4.15108e+08	4.09044e+08	4.22902e+08	3.4352e+08	3.21855e+08	2.83425e+08	2.89943e+08	3.91513e+08	4.16898e+08	3.14151e+08	2.74869e+08	3.70659e+08	2.43282e+08	2.0647e+08	2.83425e+08	20	21	21	19	19	20	21	18
High	Q92841	Probable ATP-dependent RNA helicase DDX17 [OS=Homo sapiens]	0	FALSE	270.048	56	38	260	29	729	80.2	8.27	734.85	38	100.2	94.5	90.5	94.6	96.3	101.5	109.7	104	108.9	3.18162e+08	2.99955e+08	2.87252e+08	3.00326e+08	3.05849e+08	3.22229e+08	3.48473e+08	3.30255e+08	3.45701e+08	2.37209e+08	2.71329e+08	2.74247e+08	2.27285e+08	205524374	2.82422e+08	2.4679e+08	211859094	3.45701e+08	24	28	26	26	22	27	27	22
High	P61204	ADP-ribosylation factor 3 [OS=Homo sapiens]	0	FALSE	269.423	81	15	181	2	181	20.6	7.43	713.78	15	72.7	77.6	79.9	160.6	111.3	62.4	97.2	150.5	87.7	5.55524e+06	5.93e+06	6.10371e+06	1.22723e+07	8.50487e+06	4.76636e+06	7.42474e+06	1.1498e+07	6.70242e+06	4.14178e+06	5364068	5.82736e+06	9.28758e+06	5.71509e+06	4.17754e+06	5.25822e+06	7.376e+06	6.70242e+06	4	3	4	4	2	2	3	4
High	P60228	Eukaryotic translation initiation factor 3 subunit E [OS=Homo sapiens]	0	FALSE	269.091	69	25	181	25	445	52.2	6.04	616.42	25	117.4	149.8	137.1	62.5	61.3	62.6	91.1	103.1	115.3	1.77305e+08	226245797	2.07052e+08	9.44422e+07	9.25782e+07	9.45731e+07	1.37563e+08	155767833	1.74157e+08	1.32192e+08	2.04654e+08	1.97678e+08	7.14732e+07	6.22106e+07	8.289e+07	9.74228e+07	9.99252e+07	1.74157e+08	25	23	23	21	19	22	21	21
High	Q15366-1	Poly(rC)-binding protein 2 [OS=Homo sapiens]	0	FALSE	268.979	82	14	274	1	365	38.6	6.79	918.58	14	73.5	116.8	92.3	74.1	46.9	87.1	211.3	96.4	101.8	2.23079e+06	3.54575e+06	2.8024e+06	2.2489e+06	1.42349e+06	2.64443e+06	6.41618e+06	2.92899e+06	3.09054e+06	1.6632e+06	3.20736e+06	2.67552e+06	1.70195e+06	956555	2317750	4.54395e+06	1.87895e+06	3.09054e+06	1	1	1	1	1	1	1	1
High	Q8WWI1-3	Isoform 3 of LIM domain only protein 7 [OS=Homo sapiens]	0	FALSE	268.82	37	38	103	38	1349	153.6	7.75	323.65	38	8.3	4.6	4.5	110.6	107.9	111.3	205.2	180.4	167.1	5.38194e+06	2.99736e+06	2.89201e+06	7.13802e+07	6.96212e+07	7.17882e+07	1.3237e+08	1.16402e+08	1.07839e+08	4.01257e+06	2.7113e+06	2.76108e+06	5.40201e+07	4.6784e+07	6.29199e+07	9.37447e+07	7.46717e+07	1.07839e+08	2	2	3	30	26	30	34	30
High	Q15366-6	Isoform 6 of Poly(rC)-binding protein 2 [OS=Homo sapiens]	0	FALSE	267.95	82	14	269	0	361	38.1	6.79	899.16	14
High	Q96QK1	Vacuolar protein sorting-associated protein 35 [OS=Homo sapiens]	0	FALSE	267.189	47	27	207	27	796	91.6	5.49	690.35	27	90	86.3	85	113.2	115.2	107.4	103.8	103.9	95.2	1.45962e+08	139969829	1.3788e+08	1.83593e+08	1.86871e+08	1.74139e+08	1.6842e+08	1.68551e+08	1.54324e+08	1.08824e+08	1.26612e+08	1.31637e+08	1.38942e+08	1.25573e+08	1.52627e+08	1.19275e+08	1.08125e+08	1.54324e+08	22	25	24	22	22	24	24	22
High	P62263	40S ribosomal protein S14 [OS=Homo sapiens]	0	FALSE	267.095	70	11	127	11	151	16.3	10.05	564.88	11	74.5	105.8	90.4	82.4	104	86.6	105.4	163.2	87.8	1.17571e+08	1.67027e+08	1.42742e+08	1.30044e+08	1.6425e+08	1.36744e+08	1.6646e+08	2.5765e+08	1.38642e+08	8.76566e+07	1.51087e+08	1.3628e+08	9.84162e+07	1.10373e+08	1.19852e+08	1.17887e+08	1.65282e+08	1.38642e+08	12	13	11	10	11	13	12	10
High	Q15021	condensin complex subunit 1 [OS=Homo sapiens]	0	FALSE	266.705	36	32	140	32	1401	157.1	6.61	471.24	32	62.9	50.3	56.3	77.3	83.1	58.2	129.7	216.7	165.6	3.96105e+07	3.17074e+07	3.54589e+07	4.86953e+07	5.23436e+07	3.66539e+07	8.17356e+07	1.3652e+08	1.04344e+08	2.95321e+07	2.86814e+07	3.38535e+07	3.68523e+07	3.51738e+07	3.21258e+07	5.78854e+07	8.75776e+07	1.04344e+08	21	20	23	21	20	22	25	25
High	Q09028	Histone-binding protein RBBP4 [OS=Homo sapiens]	0	FALSE	266.104	63	15	202	1	425	47.6	4.89	821.67	15	75.7	114.5	92.8	72.7	90.1	82.5	189.6	101.7	80.3	2.00425e+07	3.02918e+07	2.4567e+07	1.92465e+07	2.38522e+07	2.18404e+07	5.01661e+07	2.69213e+07	2.12525e+07	1.49429e+07	2.74009e+07	2.34547e+07	1.45656e+07	1.60282e+07	1.91423e+07	3.55278e+07	1.72701e+07	2.12525e+07	1	1	1	1	1	1	1	1
High	Q9Y617-1	phosphoserine aminotransferase [OS=Homo sapiens]	0	FALSE	265.968	81	23	248	23	370	40.4	7.66	797.78	23	94.5	73.3	96	74.6	72.3	78.7	130.7	138.2	141.7	5.62752e+08	4.36786e+08	5.7154e+08	4.44191e+08	4.3063e+08	4.68613e+08	778449161	8.23284e+08	8.43827e+08	4.19567e+08	3.95102e+08	5.45663e+08	336160915	2.89374e+08	4.10723e+08	5.513e+08	5.28137e+08	8.43827e+08	25	24	25	24	24	24	26	25
High	P21796	voltage-dependent anion-selective channel protein 1 [OS=Homo sapiens]	0	FALSE	265.539	77	19	267	18	283	30.8	8.54	911.33	19	125.6	123.4	119.1	56.9	56.9	49.5	139	129.6	100	7.27422e+08	7.14362e+08	6.89558e+08	3.29261e+08	3.29558e+08	2.86517e+08	8.05121e+08	7.50781e+08	5.79321e+08	5.42339e+08	6.46187e+08	6.58338e+08	2.49183e+08	2.21456e+08	2.51122e+08	5.70189e+08	4.81627e+08	5.79321e+08	19	21	20	18	17	17	20	20
High	Q8NE71-1	ATP-binding cassette sub-family F member 1 [OS=Homo sapiens]	0	FALSE	265.262	36	20	109	20	845	95.9	6.8	403.14	20	71.5	70.7	67.3	118.2	117.7	110.5	122.3	121	100.9	5.44973e+07	5.39116e+07	5.13567e+07	9.01197e+07	8.97419e+07	8.42349e+07	9.32689e+07	9.22968e+07	7.69296e+07	4.06312e+07	4.87665e+07	4.90315e+07	6.8202e+07	6.03047e+07	7.3829e+07	6.60533e+07	5.92085e+07	7.69296e+07	19	21	24	20	22	21	22	21
High	Q9H3U1-2	Isoform 2 of Protein unc-45 homolog A [OS=Homo sapiens]	0	FALSE	264.977	38	26	195	26	929	101.6	6.06	702.98	26	137.9	126.2	133.3	112.3	110.7	108	55.2	61	55.4	1.37529e+08	1.25872e+08	1.32863e+08	1.1199e+08	1.10354e+08	1.07646e+08	5.5071e+07	6.07845e+07	5.52601e+07	102536271	113859073	1.26848e+08	8.47536e+07	7.41559e+07	9.43482e+07	3.90014e+07	3.89933e+07	5.52601e+07	25	25	24	24	23	25	22	24
High	Q12874	splicing factor 3a subunit 3 [OS=Homo sapiens]	0	FALSE	263.494	57	21	158	21	501	58.8	5.38	577.2	21	112.9	102.7	109.4	72.4	72.1	72	124.3	120.8	113.3	1.58503e+08	144184382	1.53603e+08	1.01602e+08	1.01244e+08	1.01131e+08	1.74538e+08	1.69575e+08	1.5911e+08	1.18174e+08	1.30424e+08	146648568	7.68916e+07	6.80341e+07	8.8638e+07	1.23608e+08	1.08783e+08	1.5911e+08	21	21	22	19	19	20	21	21
High	Q15366-4	Isoform 4 of Poly(rC)-binding protein 2 [OS=Homo sapiens]	0	FALSE	263.186	80	13	269	1	331	34.9	8	949.11	13	105.2	99.3	75.3	60.4	85	86.8	148.4	131.6	107.9	4.49529e+06	4.24191e+06	3.21832e+06	2.57936e+06	3.63124e+06	3.70906e+06	6.33905e+06	5.62345e+06	4.61131e+06	3351519	3837086	3.07261e+06	1.95204e+06	2440118	3.25086e+06	4489334	3.60744e+06	4.61131e+06	2	2	1	1	2	3	1	3
High	P25786-1	Proteasome subunit alpha type-1 [OS=Homo sapiens]	0	FALSE	262.925	74	16	159	16	263	29.5	6.61	518.6	16	106.7	99	102.4	96.6	98.1	96.3	97.5	110.6	92.8	3.72969e+08	3.45891e+08	358049792	3.37601e+08	3.42777e+08	3.367e+08	3.40715e+08	3.86554e+08	3.24288e+08	2.78072e+08	3.12881e+08	3.41839e+08	2.55495e+08	2.30339e+08	2.95106e+08	2.41295e+08	2.47974e+08	3.24288e+08	19	21	19	18	17	19	15	14
High	Q01469	Fatty acid-binding protein, epidermal [OS=Homo sapiens]	0	FALSE	262.819	86	15	154	15	135	15.2	7.01	598.89	15	137.6	167.6	169.5	41.8	41.9	44.2	101.6	95.1	100.7	5.08467e+08	6.19082e+08	6.26182e+08	154479337	1.54966e+08	1.63286e+08	3.75314e+08	3.51203e+08	3.71887e+08	3.79094e+08	5.6e+08	597831744	1.16909e+08	1.04134e+08	1.43114e+08	2.65798e+08	2.25297e+08	3.71887e+08	16	17	17	14	11	15	16	15
High	P28290	Sperm-specific antigen 2 [OS=Homo sapiens]	0	FALSE	262.18	36	30	94	30	1259	138.3	5.19	318.65	30	241	280.2	249.1	18.2	16.7	15.5	24.9	19.6	34.7	1.22577e+08	142513952	1.26661e+08	9.26822e+06	8.499e+06	7.88824e+06	1.26818e+07	9.9741e+06	1.76276e+07	9.13889e+07	1.28913e+08	1.20926e+08	7.01413e+06	5.71115e+06	6.91376e+06	8.98129e+06	6.39839e+06	1.76276e+07	25	26	25	9	8	10	11	9
High	P42224-1	Signal transducer and activator of transcription 1-alpha/beta [OS=Homo sapiens]	0	FALSE	261.122	43	25	146	25	750	87.3	6.05	508.15	25	86.6	79.6	70.7	118.9	122.3	123.7	111.8	100.7	85.6	7.68618e+07	7.06909e+07	6.27684e+07	1.05562e+08	1.08603e+08	1.09834e+08	9.9263e+07	8.94435e+07	7.59992e+07	5.73053e+07	6.39445e+07	5.99265e+07	7.98884e+07	7.29786e+07	9.62657e+07	7.02983e+07	5.7378e+07	7.59992e+07	21	22	22	23	24	22	22	21
High	P31949	protein S100-A11 [OS=Homo sapiens]	0	FALSE	261.121	69	6	260	6	105	11.7	7.12	1258.26	6	38.8	45.7	53.3	162.4	129	157.2	103	87.4	123.3	1.23162e+08	1.45031e+08	1.69081e+08	5.1543e+08	4.09552e+08	4.99094e+08	3.27097e+08	2.77464e+08	3.91377e+08	9.18253e+07	1.3119e+08	1.61426e+08	3.90074e+08	2.75211e+08	437438792	2.31651e+08	1.77993e+08	3.91377e+08	14	14	14	13	15	13	14	14
High	Q92614-1	Unconventional myosin-XVIIIa [OS=Homo sapiens]	0	FALSE	260.911	25	35	125	35	2054	233	6.3	419.62	35	33.3	33.2	28.8	234.3	229	202.8	38.3	51.2	49	2.13865e+07	2.13337e+07	1.85201e+07	1.50613e+08	1.47161e+08	1.30346e+08	2.46373e+07	3.29299e+07	3.15215e+07	1.59449e+07	1.92977e+07	1.76816e+07	113983146	9.8889e+07	114243902	1.74482e+07	2.11245e+07	3.15215e+07	21	20	21	28	30	30	20	20
High	Q15155	Nodal modulator 1 [OS=Homo sapiens]	0	FALSE	260.638	43	28	145	1	1222	134.2	5.81	467.34	28
High	P04792	Heat shock protein beta-1 [OS=Homo sapiens]	0	FALSE	260.17	91	17	215	17	205	22.8	6.4	762.62	17	208	246.8	206.4	27.7	19.5	21.6	60.4	58.7	50.7	1651151464	1959665997	1639095073	2.20313e+08	1.54957e+08	1.71809e+08	4.79849e+08	4.65913e+08	4.02776e+08	1231036944	1772645574	1564884290	1.66731e+08	1.04128e+08	150584294	3.3983e+08	2.98883e+08	4.02776e+08	22	22	21	19	17	19	20	18
High	P52292	Importin subunit alpha-1 [OS=Homo sapiens]	0	FALSE	259.935	75	22	179	22	529	57.8	5.4	680.14	22	83.5	86.6	86.4	67	72.7	67.1	142.5	159.3	135	1.4441e+08	1.49737e+08	1.49431e+08	1.15838e+08	1.25714e+08	1.15993e+08	246413871	2.75584e+08	2.33497e+08	1.07667e+08	1.35447e+08	142665240	8.76657e+07	8.44772e+07	1.01664e+08	1.74511e+08	1.76787e+08	2.33497e+08	20	19	22	21	21	21	24	23
High	Q09028-2	Isoform 2 of Histone-binding protein RBBP4 [OS=Homo sapiens]	0	FALSE	259.016	63	15	192	1	424	47.6	4.89	793.05	15	91.6	152	132.4			132.6	220.2	85	86.2	455296	755410	658075			658781	1.09459e+06	422459	428291	339452	683317	628280			577398	775194	271008	428291	1	1	1			1	1	1
High	P43246-1	DNA mismatch repair protein MSH2 [OS=Homo sapiens]	0	FALSE	258.139	34	25	126	25	934	104.7	5.77	427.07	25	63.8	61.9	65.7	77.4	80.9	80.2	157.3	155.1	157.7	5.6526e+07	5.48563e+07	5.82491e+07	6.86191e+07	7.1735e+07	7.10488e+07	1.39421e+08	1.37426e+08	139742552	4.21437e+07	4.96211e+07	5.56119e+07	5.19305e+07	4.82044e+07	6.22718e+07	9.8738e+07	8.81587e+07	139742552	21	25	26	19	21	24	26	23
High	O95347-1	structural maintenance of chromosomes protein 2 [OS=Homo sapiens]	0	FALSE	258.064	33	31	138	31	1197	135.6	8.43	441.6	31	59.5	55.6	60.3	61.8	74.5	78.3	189.4	170.8	149.8	5.86467e+07	5.48716e+07	5.94944e+07	6.09079e+07	7.34128e+07	7.72211e+07	1.86778e+08	168435439	1.47693e+08	4.37248e+07	4.9635e+07	5.68008e+07	4.60947e+07	4.93319e+07	6.76816e+07	1.32277e+08	1.08051e+08	1.47693e+08	26	26	28	24	25	26	28	26
High	O43390-1	heterogeneous nuclear ribonucleoprotein r [OS=Homo sapiens]	0	FALSE	257.9	42	25	230	19	633	70.9	8.13	697.29	25	101.1	84.3	80.3	75.3	83.8	84.7	157.2	116	117.3	2.49648e+08	2.08208e+08	1.98429e+08	1.86044e+08	2.07103e+08	2.093e+08	388372054	2.86657e+08	2.89717e+08	1.86128e+08	1.88338e+08	1.89445e+08	1.40797e+08	1.39169e+08	1.83444e+08	2.75046e+08	183890707	2.89717e+08	19	19	20	20	19	19	20	19
High	Q15233	Non-POU domain-containing octamer-binding protein [OS=Homo sapiens]	0	FALSE	257.704	60	24	274	23	471	54.2	8.95	892.67	24	66.9	82.7	94	79.6	70.6	85.1	120.2	133.3	167.5	3.18711e+08	3.93862e+08	4.47287e+08	3.79139e+08	3.36001e+08	4.05126e+08	5.7227e+08	6.34798e+08	7.97457e+08	2.37619e+08	3.56274e+08	4.27036e+08	2.8693e+08	2.25786e+08	3.55079e+08	4.05283e+08	4.07223e+08	7.97457e+08	14	17	21	18	18	19	19	16
High	Q99798	Aconitate hydratase, mitochondrial [OS=Homo sapiens]	0	FALSE	257.636	44	25	142	25	780	85.4	7.61	461.91	25	96.1	87.4	94.9	68.6	73.6	74.9	158.1	132.5	113.8	1.08927e+08	9.90491e+07	1.07539e+08	7.76673e+07	8.34325e+07	8.48571e+07	1.79158e+08	1.50067e+08	1.28951e+08	8.12116e+07	8.95964e+07	1.02671e+08	5.87781e+07	5.60649e+07	7.43743e+07	1.2688e+08	96267854	1.28951e+08	24	21	23	21	21	22	22	21
High	O14744	Protein arginine N-methyltransferase 5 [OS=Homo sapiens]	0	FALSE	257.502	51	24	182	24	637	72.6	6.29	579.41	24	124.3	117.1	113.3	56.8	57.1	63.5	124.6	112.6	130.8	2.01813e+08	1.90227e+08	1.84049e+08	9.2298e+07	9.26813e+07	1.03135e+08	2.02343e+08	1.82848e+08	2.12362e+08	1.50464e+08	1.72073e+08	1.75716e+08	6.98505e+07	6.22799e+07	90394493	1.433e+08	1.17297e+08	2.12362e+08	25	24	26	22	20	23	26	23
High	P37802	Transgelin-2 [OS=Homo sapiens]	0	FALSE	257.37	88	18	291	18	199	22.4	8.25	1006.97	18	25.2	28.3	32.1	178.1	160.8	196.4	85.4	79.7	113.9	1.67234e+08	1.88374e+08	2.13377e+08	1184410403	1069378854	1305993931	5.67652e+08	5.30098e+08	757419313	1.24683e+08	1.70397e+08	2.03716e+08	8.96354e+08	7.186e+08	1144658096	402012463	3.40058e+08	757419313	21	22	22	27	27	26	27	26
High	P20618	proteasome subunit beta type-1 [OS=Homo sapiens]	0	FALSE	257.233	54	14	163	14	241	26.5	8.13	682.21	14	106.1	113.9	133.9	97.2	83.2	73.7	101.3	89	101.7	1.1699e+08	1.25597e+08	1.47726e+08	1.0721e+08	9.17835e+07	8.13304e+07	1.11689e+08	98157758	1.12192e+08	8.72232e+07	1.13611e+08	1.41038e+08	8.11354e+07	6.16766e+07	7.12833e+07	7.90982e+07	6.29683e+07	1.12192e+08	14	15	14	13	14	14	16	15
High	Q9BTE3-1	Mini-chromosome maintenance complex-binding protein [OS=Homo sapiens]	0	FALSE	256.97	59	22	121	22	642	72.9	5.87	414.29	22	125.6	135.2	143.3	37.9	37.7	40	116.4	134.2	129.7	7.14759e+07	7.69199e+07	8.15031e+07	2.15597e+07	2.14341e+07	2.27543e+07	6.6222e+07	7.63678e+07	7.37622e+07	5.32898e+07	6.95791e+07	7.7813e+07	1.63163e+07	1.44033e+07	1.99433e+07	4.68986e+07	4.899e+07	7.37622e+07	22	20	22	15	14	16	21	21
High	P67809	Nuclease-sensitive element-binding protein 1 [OS=Homo sapiens]	0	FALSE	256.251	56	19	259	12	324	35.9	9.88	745.41	19	43.9	144.1	114.7	64.1	73.7	85.4	128.1	64.5	181.7	1.99427e+07	6.54602e+07	5.20998e+07	2.91295e+07	3.34734e+07	3.88211e+07	5.82045e+07	2.92922e+07	8.25525e+07	1.48686e+07	5.9213e+07	4.97409e+07	2.2045e+07	2.24934e+07	3.40253e+07	4.12206e+07	1.87909e+07	8.25525e+07	11	14	15	17	17	17	15	16
High	Q9Y230	RuvB-like 2 [OS=Homo sapiens]	0	FALSE	255.905	71	29	226	29	463	51.1	5.64	763.33	29	112.1	111.5	115.2	100.4	96	104	89.5	80.4	91	4.16066e+08	4.13856e+08	4.27647e+08	3.72603e+08	3.56311e+08	3.86003e+08	332089466	2.98366e+08	3.3772e+08	3.10203e+08	374359764	4.08285e+08	2.81983e+08	2.39433e+08	3.38318e+08	2.35187e+08	1.91402e+08	3.3772e+08	30	29	30	28	26	30	27	27
High	P61160-1	Actin-related protein 2 [OS=Homo sapiens]	0	FALSE	255.862	51	15	253	15	394	44.7	6.74	928.3	15	67.3	82.3	92.2	101.4	93.6	119.3	96.1	106.6	141.2	7.99657e+07	9.78927e+07	1.09619e+08	1.20589e+08	111304986	1.41824e+08	1.14294e+08	1.26752e+08	1.67924e+08	5.96195e+07	8.85503e+07	1.04656e+08	9.12613e+07	7.47946e+07	1.24304e+08	8.09435e+07	8.13117e+07	1.67924e+08	15	16	17	14	11	16	15	14
High	Q00341-1	Vigilin [OS=Homo sapiens]	0	FALSE	255.803	36	30	165	30	1268	141.4	6.87	553.93	30	84.7	79	81.7	120.6	131.7	129.8	93.3	93.7	85.5	1.42403e+08	132816894	1.37259e+08	2.02712e+08	2.21402e+08	2.18064e+08	1.56744e+08	1.57494e+08	1.43663e+08	1.0617e+08	1.20142e+08	131044905	1.53411e+08	1.48777e+08	1.91126e+08	1.11007e+08	1.01033e+08	1.43663e+08	28	27	28	27	26	25	27	27
High	P08237	ATP-dependent 6-phosphofructokinase, muscle type [OS=Homo sapiens]	0	FALSE	255.709	45	23	114	20	780	85.1	7.99	404.57	23	138	146.7	139.9	93.4	94.5	108.9	57.6	45.1	76	6.59262e+07	7.00635e+07	6.68303e+07	4.45961e+07	4.51166e+07	5.19985e+07	2.75148e+07	2.15332e+07	3.62805e+07	4.91521e+07	6.3377e+07	6.38046e+07	3.37501e+07	3.03174e+07	4.55748e+07	1.9486e+07	1.38136e+07	3.62805e+07	17	15	15	17	15	16	12	12
High	Q969Z0-1	Protein TBRG4 [OS=Homo sapiens]	0	FALSE	255.582	48	19	132	19	631	70.7	7.42	560.7	19	111.5	103.6	96.8	70.7	61.5	67.6	116.8	136.7	134.9	1.00987e+08	9.38163e+07	8.76252e+07	6.40472e+07	5.56836e+07	6.1192e+07	105751351	1.23763e+08	122123903	7.52918e+07	8.48629e+07	8.36579e+07	4.84705e+07	3.74182e+07	5.36326e+07	7.48934e+07	7.93942e+07	122123903	19	18	19	17	17	18	20	19
High	Q02878	60S ribosomal protein L6 [OS=Homo sapiens]	0	FALSE	255.075	53	22	339	22	288	32.7	10.58	1116.01	22	112.7	101.8	97.7	88.7	103.4	90.2	81.3	131.4	92.8	1171209847	1058263540	1015310638	9.21796e+08	1074184565	9.37033e+08	8.44463e+08	1365650923	9.64107e+08	8.7321e+08	9.57268e+08	9.69342e+08	6.97609e+08	7.2183e+08	8.21277e+08	5.98051e+08	8.76066e+08	9.64107e+08	20	20	20	20	20	20	20	20
High	P15531	Nucleoside diphosphate kinase A [OS=Homo sapiens]	0	FALSE	254.995	90	15	341	3	152	17.1	6.19	1135.42	15	163.8	136	110	74.8	85.5	69.5	75	119.5	66.1	2.96431e+08	2.46142e+08	1.99121e+08	1.35372e+08	1.54709e+08	1.2577e+08	1.35724e+08	2.16261e+08	1.1958e+08	2.21008e+08	2.22651e+08	1.90106e+08	1.02448e+08	103961350	1.10233e+08	9.61197e+07	1.38731e+08	1.1958e+08	4	5	3	4	4	4	4	4
High	Q14669-1	E3 ubiquitin-protein ligase TRIP12 [OS=Homo sapiens]	0	FALSE	254.662	21	25	139	25	1992	220.3	8.48	482.33	25	99.5	106.3	106.4	86.1	79.6	81.1	127.7	112.2	101.1	3.9389e+07	4.20547e+07	4.21007e+07	3.40861e+07	3.14903e+07	3.20728e+07	5.05309e+07	4.4404e+07	3.99928e+07	2.9367e+07	3.80412e+07	4.01946e+07	2.57961e+07	2.11608e+07	2.81107e+07	3.57861e+07	2.84852e+07	3.99928e+07	22	22	20	20	19	21	21	19
High	P12429	annexin A3 [OS=Homo sapiens]	0	FALSE	254.409	77	27	264	27	323	36.4	5.92	931.48	27	137.6	122.6	132.1	82.3	89.2	74.1	93.3	94.6	74.1	8.57913e+08	7.64428e+08	8.23704e+08	5.13174e+08	5.56146e+08	4.62281e+08	5.81555e+08	5.89939e+08	4.62133e+08	6.39628e+08	6.91475e+08	7.8641e+08	3.88367e+08	373718428	4.05173e+08	4.11859e+08	3.78446e+08	4.62133e+08	25	27	28	25	25	26	27	24
High	Q04917	14-3-3 protein eta [OS=Homo sapiens]	0	FALSE	254.26	57	18	245	16	246	28.2	4.84	820.61	18	101	106.2	112.8	87.6	95.1	89.8	106.9	109	91.7	1.74333e+08	1.83214e+08	1.94561e+08	1.51173e+08	1.64095e+08	1.54943e+08	1.84386e+08	1.88035e+08	158249417	1.29976e+08	1.65729e+08	1.85753e+08	1.14407e+08	110268520	1.35802e+08	1.30583e+08	1.20624e+08	158249417	15	18	18	16	16	18	16	18
High	P11717	Cation-independent mannose-6-phosphate receptor [OS=Homo sapiens]	0	FALSE	253.662	23	36	131	36	2491	274.2	5.94	399.24	36	92.1	122.1	107.1	49.4	68.2	71.5	157	121.6	111	5.52363e+07	7.32011e+07	6.42288e+07	2.95892e+07	4.0895e+07	4.28502e+07	9.41191e+07	7.29195e+07	6.65637e+07	4.11821e+07	6.62151e+07	6.13209e+07	2.23929e+07	2.74806e+07	3.75567e+07	6.66554e+07	4.67779e+07	6.65637e+07	27	32	33	21	25	30	30	30
High	P48681	Nestin [OS=Homo sapiens]	0	FALSE	253.445	30	35	71	35	1621	177.3	4.36	233.42	35	2.2	4.1	3.1	4.8	2.3	2.9	278.8	325	276.6	1.45766e+06	2.73517e+06	2.0997e+06	3.24034e+06	1.54569e+06	1.96429e+06	1.86314e+08	2.17209e+08	1.84847e+08	1.08677e+06	2.47414e+06	2.00463e+06	2.45226e+06	1.03867e+06	1.72163e+06	1.31948e+08	1.3934e+08	1.84847e+08	4	5	6	5	4	6	34	36
High	P51665	26S proteasome non-ATPase regulatory subunit 7 [OS=Homo sapiens]	0	FALSE	253.386	69	16	153	16	324	37	6.77	590.43	16	100.3	103.4	92.3	91.3	74.7	87.3	107	128.1	115.3	1.48212e+08	1.52799e+08	1.36357e+08	1.34915e+08	1.10414e+08	1.28976e+08	1.58075e+08	1.89288e+08	1.70385e+08	1.10502e+08	1.38216e+08	1.30183e+08	1.02102e+08	7.41962e+07	1.13043e+08	1.11949e+08	1.21428e+08	1.70385e+08	18	17	18	15	15	16	16	15
High	Q9UHX1-2	Isoform 2 of Poly(U)-binding-splicing factor PUF60 [OS=Homo sapiens]	0	FALSE	253.07	48	20	151	20	542	58.1	5.35	565.53	20	106.4	111.9	112.9	84.3	81.3	87	104.5	102	109.6	1.5311e+08	1.61016e+08	1.6245e+08	1.21311e+08	1.17047e+08	1.25168e+08	1.50347e+08	1.46824e+08	1.57705e+08	1.14153e+08	1.45649e+08	1.55095e+08	9.18075e+07	7.86534e+07	1.09706e+08	106476054	9.41876e+07	1.57705e+08	22	20	20	22	17	21	21	20
High	Q9UQE7	Structural maintenance of chromosomes protein 3 [OS=Homo sapiens]	0	FALSE	252.929	35	33	147	33	1217	141.5	7.18	425.02	33	58.8	64.9	70.8	93.4	112.6	113.7	142.1	116.1	127.7	6.07466e+07	6.70449e+07	7.31622e+07	9.6469e+07	1.1632e+08	1.1744e+08	1.46831e+08	1.19988e+08	1.31961e+08	4.52904e+07	6.06465e+07	6.98497e+07	7.30071e+07	7.81643e+07	1.02932e+08	1.03986e+08	7.69725e+07	1.31961e+08	27	29	30	30	32	32	30	29
High	P55795	heterogeneous nuclear ribonucleoprotein H2 [OS=Homo sapiens]	0	FALSE	252.779	43	16	203	10	449	49.2	6.3	689.51	16	47.8	113.4	95.7	64.4	37.3	115.5	94.7	52.8	278.4	2.17388e+07	5.15887e+07	4.35275e+07	2.93085e+07	1.69726e+07	5.25601e+07	4.30972e+07	2.40224e+07	1.26637e+08	1.62077e+07	4.66654e+07	4.15568e+07	2.21805e+07	1.14053e+07	4.60671e+07	3.05215e+07	1.54104e+07	1.26637e+08	9	12	11	11	11	11	11	12
High	Q14566	DNA replication licensing factor MCM6 [OS=Homo sapiens]	0	FALSE	252.512	45	30	203	30	821	92.8	5.41	637.6	30	83.1	89	96.4	71.6	76	75.1	143.3	145.9	119.5	2.3623e+08	2.52857e+08	273841246	203443411	2.16048e+08	2.13482e+08	4.07181e+08	4.14543e+08	3.39556e+08	176124167	2.28726e+08	2.61443e+08	1.53965e+08	1.4518e+08	1.87109e+08	2.88367e+08	2.6593e+08	3.39556e+08	23	25	28	25	23	27	26	26
High	P11766	alcohol dehydrogenase class-3 [OS=Homo sapiens]	0	FALSE	252.29	72	18	144	18	374	39.7	7.49	491.26	18	128.8	119.7	141.6	126.5	110.7	120.2	41.6	53.5	57.4	1.78693e+08	1.66074e+08	1.96416e+08	1.75492e+08	153506634	1.66779e+08	5.77415e+07	7.41779e+07	7.961e+07	1.33227e+08	1.50225e+08	1.87523e+08	1.32811e+08	1.03153e+08	1.46176e+08	4.08927e+07	4.75852e+07	7.961e+07	18	20	20	21	18	20	13	15
High	Q9NTI5	Sister chromatid cohesion protein PDS5 homolog B [OS=Homo sapiens]	0	FALSE	252.187	32	28	133	26	1447	164.6	8.47	441.28	28	51.9	50	48.8	150.4	157.6	143.5	103	104	90.8	2.69622e+07	2.59943e+07	2.53423e+07	7.81489e+07	8.19056e+07	7.45375e+07	5.35248e+07	5.40388e+07	4.71895e+07	2.0102e+07	2.35136e+07	2.41949e+07	5.91426e+07	5.50388e+07	6.53295e+07	3.79064e+07	3.46659e+07	4.71895e+07	15	20	18	25	25	25	23	21
High	P07737	profilin-1 [OS=Homo sapiens]	0	FALSE	251.821	89	15	480	15	140	15	8.27	1451.88	15	97.2	94.9	101.9	79.5	78.6	90.6	125.5	110.9	120.8	1923849798	1878453748	2015909855	1572368854	1554999147	1792878751	2483469361	2194065419	2390242224	1434350650	1699183803	1924638610	1189958334	1044926959	1571395648	1758799050	1407494441	2390242224	22	22	22	19	21	22	20	21
High	P55265-2	Isoform 2 of Double-stranded RNA-specific adenosine deaminase [OS=Homo sapiens]	0	FALSE	251.807	32	28	121	1	1200	133.2	8.51	416.04	28									900									2.73728e+06									2.73728e+06
High	Q99829	Copine-1 [OS=Homo sapiens]	0	FALSE	251.391	47	18	145	18	537	59	5.83	560.37	18	84.9	46.8	54.4	155.8	171.1	117.6	83.4	101	85	161899108	8.91809e+07	103721705	2.96997e+08	3.26059e+08	2.24206e+08	1.58863e+08	1.92472e+08	1.61954e+08	1.20706e+08	8.06699e+07	9.90257e+07	2.24765e+08	2.19105e+08	1.96509e+08	1.12507e+08	1.23471e+08	1.61954e+08	16	13	14	16	17	17	18	16
High	P31930	Cytochrome b-c1 complex subunit 1, mitochondrial [OS=Homo sapiens]	0	FALSE	251.211	49	18	170	18	480	52.6	6.37	644.07	18	129.7	137.6	125.1	104.3	107.7	106.2	66.6	61.6	61.1	463416951	4.91383e+08	4.46831e+08	3.72559e+08	3.84718e+08	3.79482e+08	2.37974e+08	2.20007e+08	2.18217e+08	3.45506e+08	4.44488e+08	4.26601e+08	2.8195e+08	2.58523e+08	3.32603e+08	1.68534e+08	1.41134e+08	2.18217e+08	20	19	19	20	19	20	20	18
High	Q14517	Protocadherin Fat 1 [OS=Homo sapiens]	0	FALSE	250.737	14	37	80	37	4588	506	5	246.87	37	206.1	231.8	232.6	55.9	70.9	70.8	14.2	5.9	11.8	5.97273e+07	6.71792e+07	6.74298e+07	1.61981e+07	2.05516e+07	2.05303e+07	4.1076e+06	1.71356e+06	3.42866e+06	4.45304e+07	6.0768e+07	6.43769e+07	1.22586e+07	1.38103e+07	1.79941e+07	2.90901e+06	1.09925e+06	3.42866e+06	27	33	30	17	17	21	6	5
High	P23396	40S ribosomal protein S3 [OS=Homo sapiens]	0	FALSE	250.513	73	23	299	23	243	26.7	9.66	1024.14	23	100.5	98.6	100.4	92.6	97.6	95	109	108.5	97.7	9.68101e+08	9.49515e+08	9.67086e+08	8.91751e+08	9.40306e+08	9.1486e+08	1050242312	1045194524	9.41024e+08	7.2178e+08	8.58898e+08	923300619	6.74871e+08	6.31866e+08	8.01843e+08	7.43784e+08	6.70493e+08	9.41024e+08	24	25	25	24	21	25	22	21
High	A6NHR9-1	structural maintenance of chromosomes flexible hinge domain-containing protein 1 [OS=Homo sapiens]	0	FALSE	250.204	30	35	170	35	2005	226.2	7.3	481.8	35	122.3	105.6	109	60.1	80.1	84	117.5	110.3	111.1	7.58168e+07	6.54317e+07	6.75605e+07	3.72815e+07	4.96397e+07	5.20723e+07	7.28272e+07	6.83775e+07	6.88711e+07	5.65262e+07	5.91872e+07	6.45017e+07	2.82144e+07	3.33568e+07	4.56396e+07	5.15764e+07	4.38642e+07	6.88711e+07	32	32	33	26	29	32	32	27
High	Q15436	protein transport protein Sec23A [OS=Homo sapiens]	0	FALSE	249.522	48	22	107	19	765	86.1	7.08	366.53	22	116.1	139.8	123.8	96	87.9	96.8	93.5	57.9	88.2	4.68939e+07	5.64821e+07	5.00141e+07	3.87891e+07	3.55349e+07	3.90964e+07	3.77748e+07	2.34109e+07	3.56542e+07	3.49624e+07	5.10917e+07	4.77497e+07	2.93554e+07	2.38787e+07	3.42666e+07	2.67522e+07	1.50181e+07	3.56542e+07	18	18	21	16	15	15	17	16
High	Q9NTJ3-1	Structural maintenance of chromosomes protein 4 [OS=Homo sapiens]	0	FALSE	249.031	33	27	103	27	1288	147.1	6.79	379.6	27	46.3	60.3	67.9	67.2	68	80.5	193.9	158.7	157.1	2.58892e+07	3.37249e+07	3.79556e+07	3.76047e+07	3.80439e+07	4.49941e+07	1.08453e+08	8.87746e+07	8.78617e+07	1.9302e+07	3.05063e+07	3.62372e+07	2.8459e+07	2.55647e+07	3.94358e+07	7.6807e+07	5.6949e+07	8.78617e+07	14	22	19	17	18	20	20	18
High	Q9Y262	eukaryotic translation initiation factor 3 subunit L [OS=Homo sapiens]	0	FALSE	249.03	52	25	173	25	564	66.7	6.34	636.6	25	96.7	116.2	129.8	78.2	81.6	76.7	111.7	104.2	104.8	2.62339e+08	3.15142e+08	3.51941e+08	2.1199e+08	221388600	2.07983e+08	3.02825e+08	282546004	2.84258e+08	1.9559e+08	2.85067e+08	3.36007e+08	1.60433e+08	1.48769e+08	1.8229e+08	2.14461e+08	1.81253e+08	2.84258e+08	20	23	23	22	21	23	21	21
High	P32969	60S ribosomal protein L9 [OS=Homo sapiens]	0	FALSE	248.768	63	12	211	12	192	21.9	9.95	823.89	12	110.7	98.6	98.9	93.1	80.7	94.6	92.3	117.3	113.7	3.73975e+08	3.33138e+08	3.34123e+08	314400391	2.72629e+08	3.19672e+08	3.11948e+08	3.9627e+08	3.84212e+08	278821864	3.01345e+08	3.18996e+08	2.37936e+08	1.83201e+08	2.80181e+08	2.20923e+08	254207782	3.84212e+08	15	15	14	14	13	15	15	14
High	Q8TEQ6	gem-associated protein 5 [OS=Homo sapiens]	0	FALSE	248.634	35	30	90	30	1508	168.5	6.62	282.23	30	167	150.3	149.7	74.7	78.6	68.2	64.5	82.8	64.3	1.03503e+08	9.31595e+07	9.27848e+07	4.62878e+07	4.8713e+07	4.22498e+07	3.99639e+07	51304493	3.98764e+07	7.71677e+07	8.42688e+07	8.85839e+07	3.50303e+07	3.27341e+07	3.70305e+07	2.83025e+07	3.29119e+07	3.98764e+07	25	26	26	21	19	21	20	18
High	P56470	galectin-4 [OS=Homo sapiens]	0	FALSE	248.416	52	14	118	14	323	35.9	9.16	474.82	14	0.4	1.7	1.8	326.3	300.4	267	0.7	1.2	0.5	1.7564e+06	6.6495e+06	6.94635e+06	1280797278	1179354033	1048102985	2.69157e+06	4.8268e+06	2.05893e+06	1.30951e+06	6.01491e+06	6.63185e+06	9.69299e+08	7.92501e+08	9.18626e+08	1.90618e+06	3.0964e+06	2.05893e+06	3	4	5	16	16	19	3	5
High	P26368	Splicing factor U2AF 65 kDa subunit [OS=Homo sapiens]	0	FALSE	248.169	42	14	181	14	475	53.5	9.09	762.02	14	76.9	58.9	101	116.7	101.3	81.1	115.8	136.9	111.6	1.489e+08	1.14039e+08	1.95564e+08	2.25945e+08	1.96268e+08	1.57002e+08	2.24225e+08	2.65076e+08	2.16203e+08	1.11014e+08	1.03156e+08	1.86709e+08	170993341	1.31888e+08	1.37607e+08	1.58797e+08	1.70046e+08	2.16203e+08	14	16	16	14	14	15	16	11
High	O94925-3	Isoform 3 of Glutaminase kidney isoform, mitochondrial [OS=Homo sapiens]	0	FALSE	247.229	46	23	121	23	598	65.4	7.88	437.67	23	70.6	81.1	72.2	32.6	36.7	33.4	191.9	214	167.5	5.04579e+07	5.79636e+07	5.16075e+07	2.33375e+07	2.62509e+07	2.38567e+07	1.37208e+08	1.53008e+08	119781039	3.76195e+07	5.24319e+07	4.9271e+07	1.76616e+07	1.76401e+07	2.09095e+07	9.71713e+07	9.81545e+07	119781039	18	20	18	12	13	14	21	21
High	O76021	Ribosomal L1 domain-containing protein 1 [OS=Homo sapiens]	0	FALSE	247.131	37	20	175	20	490	54.9	10.13	614.74	20	125.9	107.7	107.9	85.4	85.3	93.6	98.6	92.8	102.8	2.983e+08	2.55143e+08	2.55754e+08	2.02416e+08	2.02069e+08	221851298	2.33585e+08	2.19907e+08	2.43482e+08	2.22401e+08	2.30793e+08	2.44174e+08	1.53187e+08	1.35786e+08	1.94445e+08	1.65426e+08	1.41071e+08	2.43482e+08	18	19	17	18	18	17	17	17
High	P08240-1	signal recognition particle receptor subunit alpha [OS=Homo sapiens]	0	FALSE	247.075	50	21	133	21	638	69.8	8.95	471.05	21	78	105.7	98.2	145.9	132.8	188.3	40	40.8	70.4	3.78058e+07	5.12617e+07	4.76444e+07	7.07286e+07	6.44036e+07	9.12953e+07	1.94075e+07	1.97673e+07	3.41235e+07	2.81866e+07	4.63696e+07	4.54873e+07	5.35269e+07	4.32779e+07	8.00172e+07	1.37445e+07	1.26808e+07	3.41235e+07	19	21	21	21	20	21	15	13
High	P21964-1	Catechol O-methyltransferase [OS=Homo sapiens]	0	FALSE	246.921	67	17	116	17	271	30	5.47	504.43	17	50.2	53.4	48.8	221.7	225.4	207.8	32.8	30.3	29.6	5.54051e+07	5.88781e+07	5.38518e+07	2.44575e+08	2.48557e+08	2.29214e+08	3.61537e+07	3.33666e+07	3.26609e+07	4.1308e+07	5.32591e+07	5.14136e+07	1.85093e+08	1.67025e+08	2.00898e+08	2.56041e+07	2.14047e+07	3.26609e+07	16	17	16	17	17	17	13	12
High	P23368-1	NAD-dependent malic enzyme, mitochondrial [OS=Homo sapiens]	0	FALSE	246.889	70	24	105	24	584	65.4	7.61	388.25	24	159.4	163.5	170.1	70.7	59.6	65.7	69.9	69.8	71.3	9.18114e+07	9.41763e+07	9.8007e+07	4.07296e+07	3.4334e+07	3.78253e+07	4.02738e+07	4.01992e+07	4.1056e+07	6.84511e+07	8.51886e+07	9.35697e+07	3.08239e+07	2.30717e+07	3.31526e+07	2.8522e+07	2.57878e+07	4.1056e+07	21	22	23	17	15	18	15	15
High	P04632	Calpain small subunit 1 [OS=Homo sapiens]	0	FALSE	246.666	82	15	210	15	268	28.3	5.2	687.7	15	109.4	95.3	143.9	130.8	108.5	103.2	58.6	73	77.2	3.2823e+08	2.85766e+08	4.31545e+08	3.92197e+08	3.25556e+08	3.09627e+08	1.75903e+08	2.18846e+08	2.3163e+08	2.44716e+08	2.58494e+08	4.12007e+08	2.96812e+08	2.18767e+08	2.71378e+08	1.24575e+08	1.4039e+08	2.3163e+08	16	18	16	15	17	17	14	17
High	P61158	actin-related protein 3 [OS=Homo sapiens]	0	FALSE	246.405	68	19	252	18	418	47.3	5.88	934.76	19	70.2	78.9	84.1	110.5	111.8	120.8	102.7	101.1	119.9	1.60295e+08	1.80152e+08	1.92196e+08	2.52313e+08	2.55343e+08	2.75886e+08	2.34629e+08	2.30884e+08	2.73902e+08	1.1951e+08	1.62959e+08	1.83494e+08	1.90949e+08	1.71585e+08	2.41805e+08	1.66165e+08	1.48112e+08	2.73902e+08	19	21	21	21	19	21	21	21
High	sp P15559-1	NAD(P)H dehydrogenase [quinone] 1 [OS=Homo sapiens]	0	TRUE	245.96	55	20	282	20	274	30.8	8.88	1001.51	20	41.1	49.1	40.5	181	182.6	186.1	64.4	69	86.2	1.83394e+08	219275314	1.81058e+08	8.0816e+08	8.15184e+08	8.31048e+08	2.87588e+08	3.0811e+08	3.84922e+08	1.36731e+08	198348808	1.72861e+08	611610044	5.47786e+08	7.28385e+08	2.0367e+08	1.97653e+08	3.84922e+08	18	24	22	27	26	27	23	20
High	Q6P2E9-1	Enhancer of mRNA-decapping protein 4 [OS=Homo sapiens]	0	FALSE	245.635	26	22	98	22	1401	151.6	5.86	391.56	22	87.5	91.1	99.5	42	44.3	56.3	151.2	135.7	192.3	5.3797e+07	5.60036e+07	6.11639e+07	2.58403e+07	2.72584e+07	3.46428e+07	9.29706e+07	8.34488e+07	1.1826e+08	4.01091e+07	5.06589e+07	5.83947e+07	1.95558e+07	1.83171e+07	3.03632e+07	6.5842e+07	53532447	1.1826e+08	21	20	22	15	14	18	15	17
High	Q15102	Platelet-activating factor acetylhydrolase IB subunit gamma [OS=Homo sapiens]	0	FALSE	245.399	83	12	152	12	231	25.7	6.84	651.16	12	88.9	87.3	81.2	137.8	137.2	126.7	76	87.6	77.3	2.52912e+08	2.48586e+08	2.30997e+08	3.92284e+08	3.9061e+08	3.60587e+08	2.16346e+08	2.49252e+08	2.19929e+08	1.88562e+08	2.24863e+08	2.20538e+08	2.96878e+08	2.62482e+08	3.16042e+08	1.53217e+08	1.59895e+08	2.19929e+08	12	13	13	12	13	13	11	12
High	P08133-1	annexin A6 [OS=Homo sapiens]	0	FALSE	245.077	55	29	83	29	673	75.8	5.6	270.72	29	269	303.6	256.6	11.1	6.7	7.3	14.3	17.6	13.9	2.50221e+08	2.82412e+08	2.38729e+08	1.03048e+07	6.20063e+06	6.78518e+06	1.32838e+07	1.63515e+07	1.28942e+07	1.86555e+08	2.5546e+08	2.27921e+08	7.79863e+06	4.16669e+06	5.94698e+06	9.4076e+06	1.04895e+07	1.28942e+07	24	24	24	9	5	9	9	7
High	Q9UHB9	Signal recognition particle subunit SRP68 [OS=Homo sapiens]	0	FALSE	244.429	43	24	182	24	627	70.7	8.56	607.08	24	105.7	105.7	106.6	74.2	82.1	77.4	129	107.7	111.7	1.17783e+08	1.17752e+08	1.18833e+08	8.26358e+07	9.14295e+07	8.62258e+07	1.43704e+08	120036383	1.24451e+08	8.78143e+07	1.06514e+08	1.13453e+08	6.25382e+07	6.14387e+07	7.55739e+07	1.01772e+08	7.70034e+07	1.24451e+08	21	21	23	21	20	22	21	19
High	Q9H845	Acyl-CoA dehydrogenase family member 9, mitochondrial [OS=Homo sapiens]	0	FALSE	244.157	51	20	105	20	621	68.7	7.96	362.93	20	87.6	81.8	81.1	138.6	131.9	122.5	79.2	94.2	83.1	4.90727e+07	4.58174e+07	4.54579e+07	7.76352e+07	7.39185e+07	6.86121e+07	4.43798e+07	5.28026e+07	4.65399e+07	3.65868e+07	4.14448e+07	4.33997e+07	5.87538e+07	4.96717e+07	6.01361e+07	3.14299e+07	3.38729e+07	4.65399e+07	16	19	18	19	20	20	17	18
High	P23246-1	splicing factor, proline- and glutamine-rich [OS=Homo sapiens]	0	FALSE	243.966	39	18	202	17	707	76.1	9.44	727.66	18	80.9	89.1	92.1	93.1	85.3	87.7	120.4	118.5	132.8	3.80238e+08	4.18806e+08	4.32855e+08	4.37495e+08	400902060	411783097	5.65379e+08	5.5672e+08	6.23817e+08	2.83491e+08	3.78837e+08	4.13257e+08	3.31093e+08	2.69398e+08	3.60914e+08	4.00402e+08	3.57137e+08	6.23817e+08	14	20	19	17	16	18	18	17
High	P19367-1	Hexokinase-1 [OS=Homo sapiens]	0	FALSE	243.563	41	32	165	25	917	102.4	6.8	552.37	32	105.1	102.2	106.3	122.6	118.9	128.5	70	64.2	82.3	1.11016e+08	1.07926e+08	1.12234e+08	1.29519e+08	1.25549e+08	1.35698e+08	7.3897e+07	6.77974e+07	86964667	8.27692e+07	9.7626e+07	1.07153e+08	9.80192e+07	8.43662e+07	1.18935e+08	5.2334e+07	4.34921e+07	86964667	23	24	25	24	22	23	22	20
High	P16615	Sarcoplasmic/endoplasmic reticulum calcium ATPase 2 [OS=Homo sapiens]	0	FALSE	243.512	32	24	181	19	1042	114.7	5.34	626.03	24	82.3	112.2	123.9	102.1	98.3	119.8	89.7	68.6	103.1	9.83792e+07	1.34076e+08	1.48128e+08	1.22014e+08	1.17429e+08	1.43137e+08	1.07252e+08	8.19399e+07	123263873	7.33479e+07	1.21281e+08	1.41422e+08	9.23395e+07	7.89096e+07	1.25454e+08	7.59564e+07	5.25645e+07	123263873	17	17	19	17	15	17	17	16
High	P56537	eukaryotic translation initiation factor 6 [OS=Homo sapiens]	0	FALSE	243.037	89	10	133	10	245	26.6	4.68	566.67	10	65.4	68	70.6	118.9	120.2	116	148.1	102.9	89.9	1.3367e+08	1.38922e+08	1.44212e+08	2.42822e+08	2.45586e+08	236869952	3.02474e+08	2.10274e+08	1.83698e+08	9.96597e+07	1.25664e+08	1.37682e+08	1.83766e+08	1.65029e+08	2.07608e+08	2.14213e+08	134891133	1.83698e+08	13	14	13	14	13	16	14	14
High	Q00796	Sorbitol dehydrogenase [OS=Homo sapiens]	0	FALSE	243.017	66	16	156	16	357	38.3	7.97	600.16	16	95.5	80.9	89	136.3	148.4	151.9	72	58.9	67.1	2.17143e+08	1.84051e+08	2.02301e+08	3.09976e+08	3.3761e+08	3.45399e+08	1.63706e+08	1.34023e+08	1.52644e+08	1.61894e+08	1.66486e+08	193141344	2.34588e+08	2.26867e+08	3.0273e+08	1.15937e+08	8.59757e+07	1.52644e+08	15	14	16	14	15	16	16	16
High	O60684	Importin subunit alpha-7 [OS=Homo sapiens]	0	FALSE	242.797	64	16	201	8	536	60	4.98	716.2	16	93.1	100.9	111.5	87.6	86.6	95.7	116.5	111.2	96.8	3.59987e+07	3.8993e+07	4.31101e+07	3.38745e+07	3.3488e+07	3.69912e+07	4.50415e+07	4.29917e+07	3.74048e+07	2.68393e+07	3.52717e+07	4.11583e+07	2.5636e+07	2.25033e+07	3.24215e+07	3.18985e+07	2.75792e+07	3.74048e+07	10	10	9	10	10	8	9	9
High	Q15459	splicing factor 3A subunit 1 [OS=Homo sapiens]	0	FALSE	242.321	36	24	174	24	793	88.8	5.22	550.66	24	113.9	122.2	114.1	66.4	65.9	68.3	120.9	114.2	114.1	1.9639e+08	2.10587e+08	196742428	1.14533e+08	1.13577e+08	1.17717e+08	2.08343e+08	1.96905e+08	1.96713e+08	1.46421e+08	1.9049e+08	1.87835e+08	8.66778e+07	7.6321e+07	103174687	1.47549e+08	1.26315e+08	1.96713e+08	26	25	25	22	20	23	26	22
High	P67936	Tropomyosin alpha-4 chain [OS=Homo sapiens]	0	FALSE	242.15	73	26	201	8	248	28.5	4.69	657.08	26	76.4	83.8	76.2	69.1	77.4	69.6	165	150.4	132	5.43595e+07	5.96129e+07	5.42051e+07	4.91494e+07	5.50837e+07	4.95427e+07	1.17355e+08	1.06966e+08	9.39058e+07	4.05284e+07	5.39238e+07	5.17509e+07	3.7196e+07	3.70151e+07	4.34225e+07	8.31113e+07	6.86188e+07	9.39058e+07	7	7	8	8	7	8	8	8
High	P05556-1	Integrin beta-1 [OS=Homo sapiens]	0	FALSE	241.975	34	19	138	19	798	88.4	5.39	462.68	19	145.4	139.3	132.8	105.4	107.6	101	55	58.1	55.5	1.95669e+08	1.87526e+08	1.78787e+08	1.41901e+08	1.44861e+08	1.35901e+08	7.4007e+07	7.81837e+07	7.46774e+07	1.45883e+08	1.69629e+08	1.70692e+08	1.0739e+08	9.73435e+07	1.19112e+08	5.2412e+07	5.01549e+07	7.46774e+07	16	15	18	17	16	19	16	16
High	P23258	tubulin gamma-1 chain [OS=Homo sapiens]	0	FALSE	241.869	72	18	124	18	451	51.1	6.14	459.56	18	90.4	80.5	82.5	105.8	96.7	101.4	108.7	108.5	125.6	5.34704e+07	4.76258e+07	4.87954e+07	6.25972e+07	5.71955e+07	6.00119e+07	6.42767e+07	6.41603e+07	7.42759e+07	3.98655e+07	4.30806e+07	4.65862e+07	4.73731e+07	3.84342e+07	5.25984e+07	4.55209e+07	4.11589e+07	7.42759e+07	18	19	17	19	18	19	18	15
High	P31689	DnaJ homolog subfamily A member 1 [OS=Homo sapiens]	0	FALSE	241.706	51	13	140	13	397	44.8	7.08	546.39	13	95.4	123.6	111.1	76.9	72.8	87.3	120	97.8	115.2	9.14227e+07	1.18449e+08	106479131	7.37409e+07	6.97502e+07	8.36716e+07	115034570	9.38022e+07	1.10455e+08	6.81613e+07	1.07145e+08	1.01658e+08	5.58066e+07	4.68707e+07	7.33352e+07	8.14678e+07	6.01741e+07	1.10455e+08	16	15	15	16	14	15	14	13
High	Q3ZCM7	tubulin beta-8 chain [OS=Homo sapiens]	0	FALSE	241.615	31	13	631	4	444	49.7	4.89	1832.78	13	123	40		127.1	232.5	50.7	169.6	157.2		1.30291e+06	423384		1.34712e+06	2.46315e+06	537462	1.7974e+06	1.66537e+06		971403	382978		1.01949e+06	1.65519e+06	471066	1.27292e+06	1.06833e+06		1	1		1	1	1	1	1
High	Q86Y56	Dynein assembly factor 5, axonemal [OS=Homo sapiens]	0	FALSE	241.475	44	25	141	25	855	93.5	6.42	487.37	25	91	85.9	86.7	99.1	101.4	103.4	98.6	135.3	98.7	5.17868e+07	4.89135e+07	4.9383e+07	5.64375e+07	5.77291e+07	5.884e+07	5.6107e+07	7.70009e+07	5.61615e+07	3.86103e+07	4.42455e+07	4.71472e+07	4.27115e+07	3.87927e+07	5.15712e+07	3.97351e+07	4.93962e+07	5.61615e+07	21	25	24	23	23	24	24	21
High	O76094	Signal recognition particle subunit SRP72 [OS=Homo sapiens]	0	FALSE	241.444	51	23	120	23	671	74.6	9.26	472.69	23	105.7	95.8	116.1	81.6	83.3	81.1	114.7	114.8	106.9	1.04083e+08	9.43076e+07	1.14241e+08	8.02933e+07	8.19729e+07	7.98224e+07	112938843	1.13053e+08	1.05224e+08	7.76004e+07	8.53073e+07	1.09068e+08	6.07654e+07	5.50841e+07	6.99616e+07	7.99836e+07	7.25234e+07	1.05224e+08	22	23	24	22	21	22	21	21
High	Q14683	structural maintenance of chromosomes protein 1a [OS=Homo sapiens]	0	FALSE	240.941	32	29	144	29	1233	143.1	7.64	433.94	29	62.2	62.3	63.3	105.3	112.4	119	133.1	119.5	123	9.56276e+07	9.58583e+07	9.73204e+07	1.61995e+08	1.7283e+08	1.82974e+08	2.04668e+08	1.8377e+08	1.89144e+08	7.12964e+07	8.671e+07	9.29142e+07	1.22596e+08	1.16138e+08	1.60371e+08	144946084	1.17888e+08	1.89144e+08	29	30	30	30	29	31	30	27
High	Q9Y3F4	Serine-threonine kinase receptor-associated protein [OS=Homo sapiens]	0	FALSE	240.863	85	25	164	25	350	38.4	5.12	549.53	25	82.4	85.4	87.7	88.1	90.6	96.4	124.9	123	121.5	2.0593e+08	2.13474e+08	2.19198e+08	2.20284e+08	2.26402e+08	2.40814e+08	3.12205e+08	3.07298e+08	3.03685e+08	1.53533e+08	1.93101e+08	2.09274e+08	1.66709e+08	1.52138e+08	2.11065e+08	2.21104e+08	1.97132e+08	3.03685e+08	23	21	23	25	24	26	26	23
High	P46063	ATP-dependent DNA helicase Q1 [OS=Homo sapiens]	0	FALSE	239.947	56	24	116	23	649	73.4	7.88	391.83	24	43.6	55.8	53.8	63.3	56.5	63.2	180.3	161.7	221.8	2.83575e+07	3.6265e+07	3.49685e+07	4.11803e+07	3.67063e+07	4.10859e+07	117226945	1.05146e+08	1.44194e+08	2.11423e+07	3.28041e+07	3.33853e+07	3.1165e+07	2.46659e+07	3.60104e+07	8.30204e+07	6.74513e+07	1.44194e+08	13	16	16	15	14	16	20	19
High	Q14651	Plastin-1 [OS=Homo sapiens]	0	FALSE	239.702	50	19	154	14	629	70.2	5.41	563.24	19	71.9	59.7	63.8	172	159	154.8	65.6	78.3	74.9	4.63878e+07	3.85019e+07	4.11702e+07	1.10926e+08	1.02536e+08	9.98239e+07	4.22839e+07	5.0536e+07	4.83424e+07	3.4585e+07	3.48274e+07	3.93062e+07	83948430	6.89021e+07	8.74922e+07	2.99456e+07	3.24189e+07	4.83424e+07	11	11	13	13	14	13	12	13
High	P98160	Basement membrane-specific heparan sulfate proteoglycan core protein [OS=Homo sapiens]	0	FALSE	239.449	14	34	77	34	4391	468.5	6.51	259.37	34	5.8	3.5	7.2	287.3	289.2	294.8	1.8	5.5	5	1.03093e+06	624234	1.29004e+06	5.14742e+07	5.1828e+07	5.28207e+07	331225	980726	889284	768623	564660	1.23163e+06	3.89553e+07	3.48274e+07	4.62955e+07	234574	629136	889284	4	4	5	26	26	25	3	3
High	Q16181	Septin-7 [OS=Homo sapiens]	0	FALSE	239.371	53	18	146	17	437	50.6	8.63	562.97	18	93.9	131.9	124.5	127.6	121.9	144	60	42.1	54.2	9.64895e+07	1.35598e+08	128005308	1.31218e+08	125272961	1.48004e+08	6.17131e+07	4.32525e+07	5.5722e+07	7.1939e+07	1.22657e+08	1.2221e+08	9.93051e+07	8.41808e+07	1.29721e+08	4.37054e+07	2.77465e+07	5.5722e+07	18	18	18	18	17	19	14	15
High	P42285	Superkiller viralicidic activity 2-like 2 [OS=Homo sapiens]	0	FALSE	238.94	34	28	167	28	1042	117.7	6.52	568.54	28	94.4	90.7	97.4	73.6	81.8	77.3	126.2	135.7	122.9	1.2615e+08	121235323	1.30217e+08	9.83978e+07	1.09316e+08	1.03266e+08	1.6863e+08	1.81311e+08	1.64296e+08	9.4053e+07	1.09665e+08	1.24322e+08	7.44668e+07	7.34578e+07	9.05091e+07	1.19424e+08	1.16311e+08	1.64296e+08	27	28	26	25	25	26	27	28
High	P12004	proliferating cell nuclear antigen [OS=Homo sapiens]	0	FALSE	238.796	83	14	214	14	261	28.8	4.69	781.32	14	76.2	83.2	80.9	63.8	68.2	62.7	162.8	166.4	135.8	4.54585e+08	4.96668e+08	4.82675e+08	3.8076e+08	4.06879e+08	3.74228e+08	9.71506e+08	9.92597e+08	8.10116e+08	3.38922e+08	4.49268e+08	4.60822e+08	2.88156e+08	2.73414e+08	3.27998e+08	6.88023e+08	6.36752e+08	8.10116e+08	17	18	17	15	15	17	17	17
High	O75691	Small subunit processome component 20 homolog [OS=Homo sapiens]	0	FALSE	237.031	15	28	137	28	2785	318.2	7.39	411.81	28	91.7	87.1	82.7	66.6	78.7	64.9	139.7	156.5	132	3.42504e+07	3.25034e+07	3.08748e+07	2.48793e+07	2.93734e+07	2.42449e+07	5.21665e+07	5.84227e+07	4.92745e+07	2.55358e+07	2.94014e+07	2.94769e+07	1.88285e+07	1.97383e+07	2.12498e+07	3.69444e+07	3.74782e+07	4.92745e+07	26	24	27	24	25	23	27	26
High	Q8N163-1	Cell cycle and apoptosis regulator protein 2 [OS=Homo sapiens]	0	FALSE	236.826	45	26	134	26	923	102.8	5.22	471.13	26	125.6	112.6	115.1	42.3	41.5	41.2	141.3	153	127.3	1.74176e+08	1.56097e+08	1.59493e+08	5.86947e+07	5.75414e+07	5.71291e+07	1.95928e+08	2.1216e+08	1.76439e+08	1.29859e+08	141199654	1.52272e+08	4.44198e+07	3.86666e+07	5.00717e+07	1.38757e+08	136100969	1.76439e+08	22	23	24	18	16	19	24	23
High	P68402-1	platelet-activating factor acetylhydrolase IB subunit beta [OS=Homo sapiens]	0	FALSE	236.465	85	11	151	11	229	25.6	5.92	599.17	11	107.5	107.8	109.7	130.9	104.1	145.1	55.3	61.8	77.8	1.6786e+08	1.68203e+08	1.7124e+08	2.04266e+08	1.62549e+08	2.26479e+08	8.62398e+07	9.64557e+07	1.21396e+08	1.2515e+08	152150924	1.63487e+08	154586984	1.0923e+08	1.98501e+08	6.10753e+07	6.18764e+07	1.21396e+08	13	14	14	12	11	12	10	10
High	P15170-3	Isoform 3 of Eukaryotic peptide chain release factor GTP-binding subunit ERF3A [OS=Homo sapiens]	0	FALSE	236.452	48	24	153	24	637	68.7	5.33	490.05	24	63.9	71.6	79.3	103.3	99.5	99.3	129.4	127.3	126.4	1.03864e+08	1.16497e+08	1.28898e+08	1.6803e+08	1.61901e+08	1.61531e+08	2.10533e+08	2.06994e+08	2.05551e+08	7.74371e+07	1.05379e+08	1.23062e+08	1.27164e+08	1.08794e+08	141576525	1.491e+08	1.32787e+08	2.05551e+08	18	22	22	19	19	21	20	18
High	Q0IIK2	TREMBL:Q0IIK2 (Bos taurus) Transferrin	0	TRUE	235.659	45	25	152	25	704	77.7	7.08	505.36	25	56.2	78.3	114.2	80.7	149.1	71.3	82.1	121.2	147	5.91942e+07	8.2462e+07	1.20192e+08	8.49537e+07	1.56994e+08	7.50279e+07	8.63867e+07	1.27593e+08	1.54719e+08	4.4133e+07	7.45922e+07	1.1475e+08	6.42924e+07	1.05497e+08	6.57593e+07	6.11793e+07	8.1851e+07	1.54719e+08	20	22	23	22	22	22	21	22
High	Q8N201	integrator complex subunit 1 [OS=Homo sapiens]	0	FALSE	235.655	21	22	110	22	2190	244.1	6.13	380.97	22	108.9	129.6	103.9	67.8	56.6	60.9	129.7	123	119.6	1.63318e+07	1.94333e+07	1.55754e+07	1.01723e+07	8.48242e+06	9.13747e+06	1.94492e+07	1.8448e+07	1.79365e+07	1.21764e+07	1.75787e+07	1.48702e+07	7.69832e+06	5.70001e+06	8.00868e+06	1.3774e+07	1.18344e+07	1.79365e+07	19	21	20	17	16	20	20	20
High	P62736	Actin, aortic smooth muscle [OS=Homo sapiens]	0	FALSE	235.646	53	20	714	1	377	42	5.39	1691.85	20		405.5							494.5		561317							684435		507747							684435		1
High	P62701	40S ribosomal protein S4, X isoform [OS=Homo sapiens]	0	FALSE	235.475	60	21	284	21	263	29.6	10.15	966.31	21	101.2	105.1	96.1	93.6	93.2	99.8	94.3	112.6	104.2	1165272502	1210381951	1106544092	1077372220	1072643200	1148890179	1085610546	1296037644	1199802985	8.68784e+08	1094869335	1056444800	8.15348e+08	720793834	1006962141	7.68832e+08	8.31409e+08	1199802985	19	21	22	20	20	22	20	19
High	P09972	Fructose-bisphosphate aldolase C [OS=Homo sapiens]	0	FALSE	235.375	45	14	148	12	364	39.4	6.87	664.73	14	161.9	188.4	259.7	78.1	69.8	63.8	36.8	22.3	19.3	6.20093e+07	7.21489e+07	9.94561e+07	2.99199e+07	2.67433e+07	2.44443e+07	1.40809e+07	8.53643e+06	7.38682e+06	4.62318e+07	6.52634e+07	9.49531e+07	2.26432e+07	1.7971e+07	2.14246e+07	9.97211e+06	5.47612e+06	7.38682e+06	11	11	11	10	9	10	8	7
High	P02786	Transferrin receptor protein 1 [OS=Homo sapiens]	0	FALSE	234.783	44	24	219	24	760	84.8	6.61	646.12	24	87.3	96.3	92.9	118.7	108.7	92.9	101.4	98.2	103.7	2.42957e+08	2.6785e+08	2.58571e+08	3.30216e+08	3.02489e+08	2.58395e+08	282120540	2.73353e+08	2.88487e+08	1.8114e+08	2.42288e+08	2.46864e+08	2.49905e+08	2.03266e+08	2.26474e+08	1.99798e+08	1.75356e+08	2.88487e+08	25	25	27	25	27	24	25	24
High	Q9BZZ5-2	Isoform 2 of Apoptosis inhibitor 5 [OS=Homo sapiens]	0	FALSE	234.562	48	21	231	21	504	56.7	5.92	728.17	21	87.4	74.5	80	86.7	92.7	87.3	137.5	141.1	112.8	2.47363e+08	210824777	2.26591e+08	2.45444e+08	2.62282e+08	2.47083e+08	389241540	399447737	3.19333e+08	1.84424e+08	1.90705e+08	2.16332e+08	185750199	1.76248e+08	2.1656e+08	2.75662e+08	2.56246e+08	3.19333e+08	21	20	21	22	21	23	21	21
High	Q9NQW7-3	Isoform 3 of Xaa-Pro aminopeptidase 1 [OS=Homo sapiens]	0	FALSE	234.011	54	23	108	23	666	74.8	5.88	384.5	23	92.9	81.8	111.2	157.1	128.9	126.2	70.5	66.7	64.8	7.27274e+07	6.40837e+07	8.70853e+07	1.23002e+08	1.00958e+08	9.87945e+07	5.51813e+07	5.22481e+07	5.0724e+07	5.42228e+07	5.79679e+07	8.31424e+07	9.30869e+07	6.78414e+07	8.65899e+07	3.90795e+07	3.35172e+07	5.0724e+07	19	18	20	21	20	21	18	15
High	P62081	40S ribosomal protein S7 [OS=Homo sapiens]	0	FALSE	233.498	60	13	285	13	194	22.1	10.1	1093.23	13	89.9	101.5	97	93.6	93.6	89.2	125.9	112.3	97	3.76736e+08	4.25407e+08	4.06293e+08	3.92345e+08	3.92362e+08	3.73784e+08	5.27528e+08	4.70571e+08	4.06497e+08	2.8088e+08	384808433	387897504	2.96924e+08	2.63659e+08	3.27609e+08	3.73597e+08	301871302	4.06497e+08	17	17	16	16	17	17	16	15
High	P30086	phosphatidylethanolamine-binding protein 1 [OS=Homo sapiens]	0	FALSE	233.419	78	15	193	15	187	21	7.53	812.74	15	106.1	132.9	96	96.6	105	82.5	107.8	101.3	71.8	4.16202e+08	5.21255e+08	3.76743e+08	3.7888e+08	412143336	3.23778e+08	422956666	3.9737e+08	2.81729e+08	310304899	4.71509e+08	3.59686e+08	2.86734e+08	2.76952e+08	2.8378e+08	299538941	2.54913e+08	2.81729e+08	17	16	15	14	14	14	16	15
High	P30041	Peroxiredoxin-6 [OS=Homo sapiens]	0	FALSE	233.222	70	23	257	23	224	25	6.38	965.59	23	125	125.9	115.8	90.9	84	82.4	96.2	92.8	86.9	8.19691e+08	825498533	7.59199e+08	5.95642e+08	5.50634e+08	5.40271e+08	6.30905e+08	6.08451e+08	5.69597e+08	6.11131e+08	7.46717e+08	7.24826e+08	4.50778e+08	370014388	4.73529e+08	4.46809e+08	3.90322e+08	5.69597e+08	22	21	22	22	22	22	22	20
High	Q96KP4	cytosolic non-specific dipeptidase [OS=Homo sapiens]	0	FALSE	232.617	66	22	174	22	475	52.8	5.97	630.47	22	95.8	91.2	82.4	128.6	140.2	148.7	58.4	69.8	84.9	9.31978e+07	8.86767e+07	8.01356e+07	1.25154e+08	1.36414e+08	1.44674e+08	5.68105e+07	6.79393e+07	8.25477e+07	6.94848e+07	8.02139e+07	7.65074e+07	9.47157e+07	9.16673e+07	126801946	40233322	4.35831e+07	8.25477e+07	18	19	18	19	18	20	16	16
High	P52565	rho GDP-dissociation inhibitor 1 [OS=Homo sapiens]	0	FALSE	232.322	69	10	184	10	204	23.2	5.11	763.1	10	83.6	110.9	110.3	80.1	63.7	76.3	148	100.9	126.3	1.59894e+08	2.12146e+08	2.11082e+08	1.53231e+08	1.2182e+08	145999568	2.83138e+08	1.93141e+08	2.41721e+08	119211065	1.919e+08	201525057	1.15964e+08	8.18603e+07	1.27964e+08	2.00519e+08	123900401	2.41721e+08	13	13	13	14	12	14	14	14
High	Q15691	Microtubule-associated protein RP/EB family member 1 [OS=Homo sapiens]	0	FALSE	232.227	78	20	156	19	268	30	5.14	532.67	20	72.6	86.6	74.4	102.1	102.1	93	149.8	116.9	102.5	1.11894e+08	1.33404e+08	1.14588e+08	1.57317e+08	1.57336e+08	143332247	2.30769e+08	1.80169e+08	1.58015e+08	8.34238e+07	1.20672e+08	1.094e+08	1.19056e+08	1.05726e+08	1.25626e+08	1.63431e+08	1.15579e+08	1.58015e+08	17	19	18	18	17	18	20	18
High	Q9NVP1	ATP-dependent RNA helicase DDX18 [OS=Homo sapiens]	0	FALSE	232.057	39	19	214	19	670	75.4	9.5	735.93	19	133.7	89.1	107.5	89.3	81.6	78	94.4	125.6	100.8	1.71946e+08	1.14546e+08	1.38249e+08	1.14901e+08	1.05006e+08	1.00282e+08	1.21473e+08	1.61558e+08	1.29692e+08	1.28196e+08	103614685	1.3199e+08	8.69564e+07	7.05616e+07	8.78938e+07	8.60271e+07	1.03639e+08	1.29692e+08	22	21	22	20	17	19	20	20
High	Q01970-1	1-phosphatidylinositol 4,5-bisphosphate phosphodiesterase beta-3 [OS=Homo sapiens]	0	FALSE	230.676	32	22	114	22	1234	138.7	5.9	429.95	22	165.9	145	161.2	130.2	110.5	103.1	33.7	27.7	22.8	7.2039e+07	6.29455e+07	6.99835e+07	5.65453e+07	4.80005e+07	4.47688e+07	1.46235e+07	1.20095e+07	9.90983e+06	5.37096e+07	5.69383e+07	6.6815e+07	4.27931e+07	3.22554e+07	3.92383e+07	1.03564e+07	7.70409e+06	9.90983e+06	20	20	20	20	17	21	13	12
High	Q9Y3I0	tRNA-splicing ligase RtcB homolog [OS=Homo sapiens]	0	FALSE	230.494	62	21	127	21	505	55.2	7.23	462.47	21	76.1	93.9	98.3	84	68.6	101.9	111.9	89.1	176.2	1.12723e+08	1.39133e+08	1.45624e+08	124455195	1.0164e+08	1.50937e+08	1.6585e+08	1.3201e+08	2.61009e+08	8.40421e+07	1.25855e+08	1.39031e+08	9.41869e+07	6.82998e+07	1.32291e+08	1.17455e+08	8.46848e+07	2.61009e+08	17	17	17	17	17	19	18	17
High	O95831-1	Apoptosis-inducing factor 1, mitochondrial [OS=Homo sapiens]	0	FALSE	230.238	47	22	187	22	613	66.9	8.95	636.12	22	61.5	61.6	59.2	74	79.7	84.4	170	149.4	160.2	8.89805e+07	8.90684e+07	8.56033e+07	1.07132e+08	1.15363e+08	1.22069e+08	2.45929e+08	2.16139e+08	231819143	6.63405e+07	8.05682e+07	8.17276e+07	8.10771e+07	7.75215e+07	1.06989e+08	1.74168e+08	138653500	231819143	21	21	20	20	20	20	24	22
High	P18124	60S ribosomal protein L7 [OS=Homo sapiens]	0	FALSE	230.098	56	21	304	21	248	29.2	10.65	1003.92	21	115.6	111.4	113.1	88.8	87.8	91.8	91.9	103	96.6	1579381490	1523027203	1545149054	1214188423	1199422849	1254453095	1256442080	1407649908	1319528954	1177527928	1377677336	1475191720	9.1889e+08	8.05987e+08	1099484353	8.89815e+08	9.03008e+08	1319528954	25	26	26	25	25	25	25	25
High	P49736	DNA replication licensing factor mcm2 [OS=Homo sapiens]	0	FALSE	230.084	37	24	143	24	904	101.8	5.52	553.55	24	81.3	100.7	91	65.6	70.5	80.6	152.8	123	134.5	1.05323e+08	1.30468e+08	1.17998e+08	8.50774e+07	9.13921e+07	1.04424e+08	197964853	1.59465e+08	1.74264e+08	7.8525e+07	1.18017e+08	1.12655e+08	6.4386e+07	6.14136e+07	9.15241e+07	140199191	1.02297e+08	1.74264e+08	18	23	21	17	17	20	22	20
High	Q15417	Calponin-3 [OS=Homo sapiens]	0	FALSE	229.333	62	14	77	13	329	36.4	6.05	315.71	14	92.2	148.3	175.1	0.1	1.3	0.1	119.8	90.3	272.9	4.13052e+07	6.64488e+07	7.84962e+07	25306	567658	59764.9	5.36815e+07	4.04671e+07	1.22339e+08	3.07956e+07	6.01073e+07	7.49422e+07	19151.4	381454	52381.9	3.80174e+07	2.59597e+07	1.22339e+08	14	16	15	1	2	1	14	12
High	Q7Z2K6	Endoplasmic reticulum metallopeptidase 1 [OS=Homo sapiens]	0	FALSE	229.06	32	19	101	19	904	100.2	7.52	359.04	19	40	50.1	44.5	219	203.9	196	46.6	46	53.9	3.7908e+07	4.74471e+07	4.21125e+07	2.07376e+08	1.93107e+08	185625512	4.40915e+07	4.3566e+07	5.10557e+07	2.82628e+07	4.2919e+07	4.02058e+07	1.56941e+08	1.29764e+08	1.62694e+08	3.12257e+07	2.79476e+07	5.10557e+07	14	16	16	21	21	19	14	15
High	O75131	Copine-3 [OS=Homo sapiens]	0	FALSE	229.01	47	20	174	19	537	60.1	5.85	611.23	20	179.4	176.6	173	46.5	45.9	43.8	76.8	81.4	76.6	3.80583e+08	3.74592e+08	3.67025e+08	9.87328e+07	9.735e+07	9.29339e+07	162979881	1.72733e+08	1.62552e+08	2.83749e+08	3.38843e+08	3.50408e+08	7.47204e+07	6.54172e+07	8.14533e+07	1.15423e+08	1.10809e+08	1.62552e+08	17	19	19	17	17	17	18	17
High	P49419-2	Isoform 2 of Alpha-aminoadipic semialdehyde dehydrogenase [OS=Homo sapiens]	0	FALSE	228.82	61	19	235	19	511	55.3	6.86	793.16	19	134.9	134.2	128.7	73.6	68.5	69.4	100.3	85.6	104.7	1.53992e+08	1.53141e+08	1.46937e+08	8.40498e+07	7.81948e+07	7.92317e+07	1.1447e+08	9.77014e+07	1.19471e+08	1.14811e+08	1.38526e+08	1.40285e+08	6.36083e+07	5.25453e+07	6.94438e+07	8.10677e+07	6.26755e+07	1.19471e+08	20	19	19	18	16	20	18	16
High	Q7L014	probable ATP-dependent RNA helicase DDX46 [OS=Homo sapiens]	0	FALSE	228.584	32	26	200	26	1031	117.3	9.29	635.53	26	110	118.5	115.3	87.7	94.8	103.2	100.5	80.3	89.8	2.04661e+08	2.20358e+08	2.14546e+08	1.63094e+08	1.76383e+08	1.9189e+08	1.86867e+08	1.4932e+08	1.6703e+08	152587497	1.99329e+08	2.04832e+08	1.23428e+08	1.18526e+08	1.68185e+08	1.32339e+08	9.57886e+07	1.6703e+08	25	26	28	23	24	27	23	24
High	P51610-1	Host cell factor 1 [OS=Homo sapiens]	0	FALSE	228.087	23	23	122	23	2035	208.6	7.46	398.4	23	87.4	84.8	79.3	113.4	113.8	110.1	109.8	100.2	101.3	6.43588e+07	6.24239e+07	5.84179e+07	8.34828e+07	8.37997e+07	8.10683e+07	8.08557e+07	7.37682e+07	7.45609e+07	4.79835e+07	5.64665e+07	5.5773e+07	6.31792e+07	5.63116e+07	7.10535e+07	5.72622e+07	4.73224e+07	7.45609e+07	19	19	20	21	19	21	20	19
High	Q8TAQ2	SWI/SNF complex subunit SMARCC2 [OS=Homo sapiens]	0	FALSE	227.689	31	23	133	15	1214	132.8	5.69	405.05	23	83.9	86.8	80.6	81	89.1	80.5	144.9	136.3	116.9	2.74608e+07	2.84141e+07	2.63843e+07	2.64892e+07	2.91413e+07	2.6332e+07	4.74104e+07	4.46082e+07	3.82653e+07	2.04738e+07	2.57024e+07	2.51897e+07	2.00469e+07	1.95824e+07	2.30791e+07	3.35762e+07	2.86162e+07	3.82653e+07	12	13	13	13	14	13	12	12
High	Q14157-1	Isoform 2 of Ubiquitin-associated protein 2-like [OS=Homo sapiens]	0	FALSE	227.668	30	16	117	16	983	103.9	6.98	434.21	16	100.3	119.6	137.8	92.7	78.5	90.6	97	87.6	95.8	6.69594e+07	7.9861e+07	9.2048e+07	6.19294e+07	5.24541e+07	6.04923e+07	6.48103e+07	5.85032e+07	6.39802e+07	4.99225e+07	7.22395e+07	8.78805e+07	4.68678e+07	3.5248e+07	5.30194e+07	4.58988e+07	3.75298e+07	6.39802e+07	13	15	16	14	10	14	13	13
High	Q03252	Lamin-B2 [OS=Homo sapiens]	0	FALSE	226.887	55	32	171	29	620	69.9	5.59	500.51	32	138.1	140.6	142.3	63.3	64.9	68.7	97.8	92.2	92.1	3.47072e+08	353367162	357559008	1.59048e+08	1.63068e+08	1.72746e+08	2.45922e+08	2.31719e+08	2.31615e+08	2.58764e+08	3.19644e+08	3.4137e+08	120366171	1.09578e+08	1.51406e+08	1.74162e+08	1.48648e+08	2.31615e+08	29	30	29	28	24	27	28	28
High	O43242	26S proteasome non-ATPase regulatory subunit 3 [OS=Homo sapiens]	0	FALSE	226.857	58	26	188	26	534	60.9	8.44	607.23	26	103	108.6	103.3	73.9	74.2	79.8	136.4	104.5	116.4	2.10103e+08	2.21585e+08	2.10717e+08	1.50819e+08	1.51365e+08	1.62797e+08	2.78395e+08	2.13301e+08	2.37476e+08	1.56645e+08	2.00438e+08	2.01177e+08	1.14139e+08	1.01714e+08	1.42686e+08	1.9716e+08	136832762	2.37476e+08	24	23	24	24	23	24	25	24
High	P46459	Vesicle-fusing ATPase [OS=Homo sapiens]	0	FALSE	226.332	57	33	143	33	744	82.5	6.95	451.3	33	130.5	109.7	117.3	98.8	105.8	86.8	87.5	93.8	69.7	1.69858e+08	1.42804e+08	1.52627e+08	1.2862e+08	1.37708e+08	1.12941e+08	1.13885e+08	122104827	9.06624e+07	1.2664e+08	1.29175e+08	1.45717e+08	9.73387e+07	9.25367e+07	9.8989e+07	8.06533e+07	7.83303e+07	9.06624e+07	32	34	35	31	28	31	31	26
High	P67775	Serine/threonine-protein phosphatase 2A catalytic subunit alpha isoform [OS=Homo sapiens]	0	FALSE	226.119	71	15	152	13	309	35.6	5.54	629.37	15	87	95	98.7	81.6	80.2	78.8	132.2	121.5	125	1.61277e+08	1.7601e+08	1.8294e+08	1.51193e+08	1.48652e+08	1.46033e+08	2.44972e+08	225233965	2.31584e+08	1.20242e+08	1.59213e+08	1.74657e+08	1.14422e+08	9.9891e+07	127992996	1.7349e+08	1.44488e+08	2.31584e+08	14	14	14	14	14	14	14	14
High	Q3LXA3	Triokinase/FMN cyclase [OS=Homo sapiens]	0	FALSE	226.082	47	19	115	19	575	58.9	7.49	416.51	19	127.6	119.4	113	90.4	76.8	73.7	84.3	93.4	121.4	9.25319e+07	8.65941e+07	8.19632e+07	6.56044e+07	5.57148e+07	5.34775e+07	6.11467e+07	6.777e+07	8.80236e+07	6.89884e+07	7.833e+07	7.82523e+07	4.9649e+07	3.74392e+07	4.68712e+07	4.33043e+07	4.34745e+07	8.80236e+07	21	18	19	19	18	17	18	16
High	P11388-1	DNA topoisomerase 2-alpha [OS=Homo sapiens]	0	FALSE	225.782	24	27	122	22	1531	174.3	8.72	374.21	27	20	20	35.8	79.3	109.7	84.1	192.2	174.9	184	5.93895e+06	5.9233e+06	1.06083e+07	2.34986e+07	3.24999e+07	2.49062e+07	5.69513e+07	5.18259e+07	5.45208e+07	4.42786e+06	5.35801e+06	1.0128e+07	1.77836e+07	2.18392e+07	2.18294e+07	4.03331e+07	3.32463e+07	5.45208e+07	9	11	12	16	16	17	18	17
High	Q8N1G4	Leucine-rich repeat-containing protein 47 [OS=Homo sapiens]	0	FALSE	225.073	52	19	168	19	583	63.4	8.28	599.79	19	99.2	99	109.8	92.9	92	83.9	113.5	110.6	98.9	1.16097e+08	115889152	1.28527e+08	1.08687e+08	1.07679e+08	9.82032e+07	1.32871e+08	1.2946e+08	1.15745e+08	8.6558e+07	1.04829e+08	1.22707e+08	8.22537e+07	7.23579e+07	8.60716e+07	9.40999e+07	8.30489e+07	1.15745e+08	25	23	23	21	22	22	22	20
High	Q9BPX3	Condensin complex subunit 3 [OS=Homo sapiens]	0	FALSE	224.665	29	21	131	21	1015	114.3	5.59	432.46	21	53.6	54.7	50.2	67.6	75.8	66.6	199.4	182.6	149.5	2.66104e+07	2.71405e+07	2.49248e+07	3.35192e+07	3.76029e+07	3.30364e+07	9.89528e+07	9.0594e+07	7.41701e+07	1.98397e+07	2.45504e+07	2.37964e+07	2.53671e+07	2.52684e+07	2.89553e+07	7.00786e+07	5.81161e+07	7.41701e+07	19	20	21	20	21	21	22	22
High	Q9HB71	Calcyclin-binding protein [OS=Homo sapiens]	0	FALSE	224.413	70	16	149	16	228	26.2	8.25	528.2	16	103.4	147.9	131.2	58	76.5	56.1	111.9	112.7	102.2	3.38709e+08	4.84616e+08	4.30003e+08	1.90104e+08	2.50701e+08	1.83969e+08	3.66724e+08	369161191	334815014	2.52529e+08	4.38366e+08	4.10534e+08	1.43869e+08	1.68466e+08	1.61243e+08	2.59715e+08	2.36817e+08	334815014	13	14	14	13	14	13	14	13
High	P23381	Tryptophan--tRNA ligase, cytoplasmic [OS=Homo sapiens]	0	FALSE	224.127	58	18	135	18	471	53.1	6.23	514.28	18	92.3	72.6	76.1	100.7	100.7	101	114	118.8	123.7	1.16662e+08	9.18238e+07	9.62598e+07	1.27309e+08	127245889	127712583	1.4408e+08	1.50221e+08	1.56412e+08	8.69792e+07	8.30606e+07	9.19016e+07	9.63467e+07	8.55066e+07	1.11936e+08	1.02038e+08	9.63668e+07	1.56412e+08	18	18	17	18	16	19	19	19
High	P40121	Macrophage-capping protein [OS=Homo sapiens]	0	FALSE	224.121	61	12	146	12	348	38.5	6.19	529.08	12	83.6	94.5	93.8	193.6	169.5	183	24.8	26.1	31.1	121348093	1.37175e+08	1.36232e+08	2.81029e+08	2.46064e+08	2.65677e+08	3.60695e+07	3.78353e+07	4.50881e+07	9.04726e+07	1.24084e+08	130064166	2.12681e+08	1.6535e+08	232856811	2.55445e+07	2.42713e+07	4.50881e+07	14	14	14	13	14	14	12	12
High	Q9BXJ9	N-alpha-acetyltransferase 15, NatA auxiliary subunit [OS=Homo sapiens]	0	FALSE	224.039	44	32	162	30	866	101.2	7.42	502.84	32	130.3	133.2	140	93.6	92.5	97.4	67.6	73.6	71.5	2.12096e+08	2.16808e+08	227901233	1.52372e+08	1.50581e+08	1.58569e+08	1.10061e+08	1.19799e+08	1.16413e+08	1.58131e+08	1.96117e+08	217582900	1.15314e+08	1.01187e+08	1.3898e+08	7.79454e+07	7.68509e+07	1.16413e+08	28	28	28	24	24	27	24	24
High	Q9BUJ2-1	Heterogeneous nuclear ribonucleoprotein U-like protein 1 [OS=Homo sapiens]	0	FALSE	223.48	36	24	131	23	856	95.7	6.92	474.57	24	62.5	70.7	58.6	130	130.5	140.2	111.2	83.6	112.7	9.46113e+07	1.07123e+08	8.87345e+07	196990064	1.97734e+08	2.12374e+08	1.68494e+08	1.26682e+08	1.70691e+08	7.05386e+07	9.68998e+07	8.4717e+07	1.49081e+08	1.32873e+08	1.86139e+08	1.19328e+08	8.12663e+07	1.70691e+08	20	21	20	21	18	22	21	19
High	Q13435	Splicing factor 3b subunit 2 [OS=Homo sapiens]	0	FALSE	223.2	35	25	133	25	895	100.2	5.67	435.31	25	126.4	114.4	108.8	75	65.6	81.1	105.7	111.3	111.6	2.18828e+08	1.98087e+08	1.883e+08	1.29848e+08	1.13516e+08	1.4046e+08	1.83001e+08	1.92723e+08	1.93267e+08	1.6315e+08	1.79183e+08	1.79775e+08	9.82682e+07	7.62806e+07	1.23108e+08	1.29602e+08	1.23632e+08	1.93267e+08	26	24	23	20	17	25	22	19
High	Q15019	septin-2 [OS=Homo sapiens]	0	FALSE	222.846	62	14	131	14	361	41.5	6.6	551.64	14	102.7	125.4	103.9	126.4	125.9	137.7	72.2	53.9	52	1.44332e+08	1.76222e+08	1.46057e+08	1.77682e+08	1.77045e+08	1.9357e+08	1.01438e+08	7.57513e+07	7.31431e+07	1.07609e+08	159404134	1.39445e+08	1.34469e+08	1.18971e+08	1.69658e+08	7.18384e+07	4.85945e+07	7.31431e+07	12	12	12	12	11	12	12	11
High	P23526-1	Adenosylhomocysteinase [OS=Homo sapiens]	0	FALSE	222.844	58	25	261	24	432	47.7	6.34	813.97	25	93.7	92.7	91.5	96.3	98.5	93.8	103.2	115.8	114.5	1308137206	1294370402	1277470714	1345063381	1375416587	1310429459	1441578550	1617605311	1599047385	9.75298e+08	1170842362	1219632641	1017935057	9.24251e+08	1148545682	1020929440	1037694894	1599047385	22	24	23	21	18	22	21	19
High	Q7Z2W4	zinc finger CCCH-type antiviral protein 1 [OS=Homo sapiens]	0	FALSE	222.842	30	19	125	19	902	101.4	8.4	419.36	19	82.4	107.4	92.8	98.4	95.3	115.8	96.2	94.1	117.7	4.3246e+07	5.63108e+07	4.86751e+07	5.15928e+07	4.99621e+07	6.07343e+07	5.0444e+07	4.93637e+07	6.17404e+07	3.22426e+07	5.09367e+07	4.64714e+07	3.90451e+07	3.35735e+07	5.32315e+07	3.57246e+07	3.16669e+07	6.17404e+07	17	16	16	18	18	18	16	18
High	P17858-1	ATP-dependent 6-phosphofructokinase, liver type [OS=Homo sapiens]	0	FALSE	222.785	47	23	123	21	780	85	7.5	462.59	23	121.8	121.4	130.4	94.5	92.9	88.5	87.4	76.6	86.6	1.26238e+08	1.25798e+08	1.35185e+08	9.79256e+07	9.62515e+07	9.1753e+07	9.06228e+07	7.93467e+07	8.97223e+07	9.4118e+07	1.13792e+08	1.29065e+08	7.41094e+07	6.4679e+07	8.04183e+07	6.41793e+07	5.0901e+07	8.97223e+07	18	18	18	17	16	18	16	15
High	P00390	Glutathione reductase, mitochondrial [OS=Homo sapiens]	0	FALSE	222.642	54	19	128	19	522	56.2	8.5	460.43	19	171.7	142.6	160.3	58.5	63.3	57.8	75.3	79.9	90.5	2.477e+08	2.05654e+08	2.31233e+08	8.43737e+07	91241005	8.34348e+07	1.08622e+08	1.15315e+08	1.30606e+08	1.84676e+08	1.86027e+08	2.20763e+08	6.38534e+07	6.13121e+07	7.31277e+07	7.69263e+07	7.39749e+07	1.30606e+08	16	18	17	12	11	12	13	11
High	P21399	Cytoplasmic aconitate hydratase [OS=Homo sapiens]	0	FALSE	222.309	42	22	118	22	889	98.3	6.68	404.98	22	129.4	123.9	117.6	128.6	120.1	117.8	54.6	48.2	59.7	9.65274e+07	9.23726e+07	8.77041e+07	9.59346e+07	8.96096e+07	8.78446e+07	4.07467e+07	3.59683e+07	4.45383e+07	7.19672e+07	8.35571e+07	8.37332e+07	7.26027e+07	6.02158e+07	7.69927e+07	2.88569e+07	2.30737e+07	4.45383e+07	21	22	21	20	20	20	17	16
High	P52789	Hexokinase-2 [OS=Homo sapiens]	0	FALSE	221.793	43	28	81	24	917	102.3	6.05	261.72	28	33.8	37.8	50.2	38.1	40.7	49.3	209	208	233.1	17254807	1.92892e+07	2.56062e+07	1.94303e+07	2.07767e+07	2.51262e+07	1.06627e+08	1.06116e+08	1.18906e+08	1.28645e+07	1.74483e+07	2.44469e+07	1.47047e+07	1.39615e+07	2.20222e+07	7.55133e+07	6.80735e+07	1.18906e+08	16	17	20	15	14	17	23	21
High	Q9UJZ1	Stomatin-like protein 2, mitochondrial [OS=Homo sapiens]	0	FALSE	221.43	58	13	185	13	356	38.5	7.39	654.21	13	118.5	101	108.3	77.7	74.5	70.1	136.3	123.3	90.4	9.1559e+07	7.8008e+07	8.366e+07	6.00538e+07	5.75394e+07	5.41456e+07	1.05345e+08	9.52497e+07	6.98404e+07	6.82629e+07	7.05633e+07	7.98722e+07	4.54483e+07	3.86653e+07	4.74567e+07	7.46059e+07	6.11028e+07	6.98404e+07	15	13	13	14	13	13	13	15
High	Q86XP3-1	ATP-dependent RNA helicase DDX42 [OS=Homo sapiens]	0	FALSE	221.264	33	25	144	25	938	102.9	7.02	454.86	25	113.2	107.3	106.9	64.5	67.4	70	127.9	127.5	115.4	101931702	9.66137e+07	9.63193e+07	5.80636e+07	6.06921e+07	6.30179e+07	115206566	1.14886e+08	1.03979e+08	7.59965e+07	8.73934e+07	9.19584e+07	4.39422e+07	4.07838e+07	5.5233e+07	8.15896e+07	7.36995e+07	1.03979e+08	23	26	25	23	18	25	24	24
High	Q8N3U4-1	Cohesin subunit SA-2 [OS=Homo sapiens]	0	FALSE	220.074	27	23	123	18	1231	141.2	5.43	390.93	23	40.9	65.9	67.8	90.2	79.3	107.5	166.3	122.3	159.9	10356107	1.67006e+07	1.71644e+07	2.2855e+07	2.00901e+07	2.72225e+07	4.2132e+07	3.09828e+07	4.05026e+07	7.72113e+06	1.51067e+07	1.63873e+07	1.72965e+07	1.35002e+07	2.38596e+07	2.9838e+07	1.98755e+07	4.05026e+07	12	16	17	14	14	17	16	13
High	Q96P70	Importin-9 [OS=Homo sapiens]	0	FALSE	219.701	32	16	155	16	1041	115.9	4.81	546.57	16	112.4	100.5	104.8	117.5	96.5	88.7	93.7	114.3	71.6	4.20973e+07	3.76376e+07	3.92513e+07	4.40314e+07	3.6157e+07	3.32321e+07	3.51152e+07	4.28276e+07	2.68117e+07	3.13862e+07	3.40456e+07	3.74742e+07	3.33227e+07	2.42968e+07	2.91268e+07	2.48687e+07	2.74739e+07	2.68117e+07	11	10	11	10	11	11	10	11
High	O00505	Importin subunit alpha-4 [OS=Homo sapiens]	0	FALSE	219.078	70	19	126	15	521	57.8	4.94	401.44	19	97.7	78.2	94.9	102.6	109.5	105.8	100.8	113.2	97.5	4.4844e+07	3.58702e+07	4.35659e+07	4.70941e+07	5.02411e+07	4.85471e+07	4.62434e+07	5.19468e+07	4.47369e+07	3.3434e+07	3.24469e+07	4.15934e+07	3.56405e+07	3.3761e+07	4.25498e+07	3.27497e+07	3.33239e+07	4.47369e+07	17	19	18	17	16	18	17	17
High	Q14258	E3 ubiquitin/ISG15 ligase TRIM25 [OS=Homo sapiens]	0	FALSE	218.659	47	23	164	23	630	70.9	8.09	523.85	23	132.1	126.9	121.4	96.4	96.5	93.5	83.8	79.6	69.8	1.49803e+08	1.43928e+08	1.37693e+08	1.09349e+08	1.09423e+08	1.06086e+08	9.50336e+07	9.03368e+07	7.91773e+07	1.11687e+08	1.30192e+08	1.31459e+08	8.27542e+07	7.35301e+07	9.29803e+07	6.7303e+07	5.79511e+07	7.91773e+07	20	22	21	21	19	23	19	18
High	O60264	SWI/SNF-related matrix-associated actin-dependent regulator of chromatin subfamily A member 5 [OS=Homo sapiens]	0	FALSE	218.643	32	33	201	24	1052	121.8	8.09	522.76	33	127.5	61	54.6	118.4	135.6	76.2	128.1	145.4	53.1	3.63932e+08	1.7395e+08	1.55942e+08	3.37953e+08	3.87079e+08	2.17409e+08	3.65676e+08	4.14885e+08	1.51666e+08	2.71334e+08	1.57349e+08	1.48881e+08	2.55761e+08	2.60109e+08	190551511	2.58972e+08	266149135	1.51666e+08	20	23	23	23	20	23	24	22
High	Q8WVM8	Sec1 family domain-containing protein 1 [OS=Homo sapiens]	0	FALSE	218.516	55	18	90	18	642	72.3	6.27	348.21	18	80.9	83.9	94.8	74.2	81.7	88.5	130.3	116.2	149.4	2.76297e+07	2.86398e+07	3.23622e+07	2.53189e+07	2.78926e+07	3.02011e+07	4.44741e+07	3.96695e+07	5.10009e+07	2.05997e+07	2.59065e+07	3.0897e+07	1.91611e+07	1.87432e+07	2.64702e+07	3.14967e+07	2.5448e+07	5.10009e+07	14	14	14	11	11	15	13	13
High	Q9BTW9	Tubulin-specific chaperone D [OS=Homo sapiens]	0	FALSE	218.448	33	24	113	24	1192	132.5	6.19	388.41	24	136.2	132.5	132.1	90.9	84.2	98.4	73.9	67.5	84.4	5.49441e+07	5.34314e+07	5.32685e+07	3.66634e+07	3.39515e+07	3.97045e+07	2.98059e+07	2.72309e+07	3.40538e+07	4.09642e+07	4.83321e+07	5.08568e+07	2.77466e+07	2.28147e+07	3.47996e+07	2.11086e+07	1.74687e+07	3.40538e+07	24	25	24	20	16	21	21	13
High	Q9HC35	Echinoderm microtubule-associated protein-like 4 [OS=Homo sapiens]	0	FALSE	218.432	34	29	110	29	981	108.8	6.4	339.03	29	56.3	52.3	51.1	194.2	179.8	185.8	64.9	64.2	51.5	5.6172e+07	5.22133e+07	5.09469e+07	1.93698e+08	1.79399e+08	1.8532e+08	6.4744e+07	6.40104e+07	5.14006e+07	4.18798e+07	4.72304e+07	4.86402e+07	1.46589e+08	1.20552e+08	1.62427e+08	4.58519e+07	4.10627e+07	5.14006e+07	18	17	18	26	27	24	21	19
High	P04040	catalase [OS=Homo sapiens]	0	FALSE	218.196	42	16	106	1	527	59.7	7.39	383.25	16	42.3	158.7	174.7	114.4	52.1	183.2	44.7		129.8	802182	3.0076e+06	3.31071e+06	2.16864e+06	988068	3.47058e+06	846757		2.45967e+06	598077	2720570	3.16082e+06	1.64121e+06	663961	3.04184e+06	599675		2.45967e+06	1	1	1	1	1	1	1
High	P05141	ADP/ATP translocase 2 [OS=Homo sapiens]	0	FALSE	218.045	62	24	343	13	298	32.8	9.69	961.84	24	88.1	84.9	79.4	94.8	87.6	90.6	115.4	130.1	129.1	3.29421e+08	3.17356e+08	2.96974e+08	3.54654e+08	3.27724e+08	3.38745e+08	4.31534e+08	4.86477e+08	4.82768e+08	2.45604e+08	2.87069e+08	283528804	2.684e+08	2.20224e+08	296898105	3.05613e+08	3.12075e+08	4.82768e+08	12	13	12	11	12	14	12	11
High	P13798	Acylamino-acid-releasing enzyme [OS=Homo sapiens]	0	FALSE	217.691	46	21	154	21	732	81.2	5.48	511.7	21	111.5	108.4	108.4	102.7	92.9	86.6	102.5	104.1	82.9	1.59298e+08	1.54939e+08	154958388	1.46709e+08	1.32804e+08	1.23672e+08	1.46414e+08	1.48748e+08	1.18439e+08	1.18766e+08	1.40152e+08	1.47943e+08	1.11028e+08	8.92413e+07	1.08394e+08	1.03691e+08	9.54219e+07	1.18439e+08	19	20	19	18	17	19	17	18
High	P28838	cytosol aminopeptidase [OS=Homo sapiens]	0	FALSE	216.94	60	24	184	24	519	56.1	7.93	587.64	24	109.9	80.3	79.9	121.1	121.8	131.5	83.3	88.1	84.1	1.71825e+08	1.25564e+08	1.24978e+08	1.89442e+08	1.90502e+08	2.05579e+08	1.30267e+08	137763822	1.31435e+08	128106168	1.13581e+08	119319633	143368653	1.28013e+08	1.80183e+08	9.22552e+07	8.83756e+07	1.31435e+08	22	22	21	20	22	22	22	21
High	P04899-1	guanine nucleotide-binding protein G(i) subunit alpha-2 [OS=Homo sapiens]	0	FALSE	216.739	64	19	152	10	355	40.4	5.54	517.89	19	111	123	106.4	74.2	90.1	108.9	114.3	90.1	82.1	7.14282e+07	7.91235e+07	6.84291e+07	4.77199e+07	57983691	7.00859e+07	7.35476e+07	5.79529e+07	5.27928e+07	5.32542e+07	7.15724e+07	6.53309e+07	3.61141e+07	3.89638e+07	61427858	5.20866e+07	3.71768e+07	5.27928e+07	11	10	11	10	9	9	11	11
High	P52907	F-actin-capping protein subunit alpha-1 [OS=Homo sapiens]	0	FALSE	216.518	66	14	149	12	286	32.9	5.69	502.28	14	86.2	100.3	92.4	106.2	107	114.8	122.6	90.1	80.3	8.1888e+07	9.52902e+07	8.78002e+07	1.00864e+08	101641703	1.09074e+08	1.16425e+08	8.56147e+07	7.62578e+07	6.10526e+07	8.61962e+07	8.3825e+07	7.63332e+07	6.83011e+07	9.55996e+07	8.24523e+07	5.49219e+07	7.62578e+07	15	16	15	15	14	15	15	14
High	P49721	proteasome subunit beta type-2 [OS=Homo sapiens]	0	FALSE	216.123	84	15	172	15	201	22.8	7.02	571.77	15	100.5	103.6	103.1	97.1	93.3	88.9	103.1	112.9	97.6	2.22297e+08	2.29007e+08	2.28016e+08	2.1461e+08	2.06209e+08	1.96461e+08	2.27943e+08	2.49576e+08	2.15903e+08	1.65736e+08	2.07151e+08	2.17692e+08	1.62415e+08	138568136	1.72191e+08	161429614	1.60103e+08	2.15903e+08	19	18	19	20	18	18	17	19
High	Q14160	protein scribble homolog [OS=Homo sapiens]	0	FALSE	214.792	26	24	91	23	1630	174.8	5.07	338.4	24	90.6	63	73.5	144.8	129.4	129.8	99.3	88.6	81	5.44424e+07	3.78682e+07	4.41863e+07	8.70241e+07	7.77845e+07	7.801e+07	5.96579e+07	5.3277e+07	4.86804e+07	4.05902e+07	3.42543e+07	4.21858e+07	6.58592e+07	5.22696e+07	6.8373e+07	4.22499e+07	3.41772e+07	4.86804e+07	20	20	17	22	21	21	21	19
High	P39656	Dolichyl-diphosphooligosaccharide--protein glycosyltransferase 48 kDa subunit [OS=Homo sapiens]	0	FALSE	214.724	57	15	251	15	456	50.8	6.55	766.59	15	98.1	86.8	85	123.5	129	111.7	88.3	99.6	78.1	3.12975e+08	2.76779e+08	2.71152e+08	3.93911e+08	4.11319e+08	3.56337e+08	2.81529e+08	3.17599e+08	2.48942e+08	2.33342e+08	2.50364e+08	2.58876e+08	2.98109e+08	2.76398e+08	312316522	1.99379e+08	2.0374e+08	2.48942e+08	17	18	18	18	16	18	18	16
High	P14324	Farnesyl pyrophosphate synthase [OS=Homo sapiens]	0	FALSE	214.658	47	10	105	10	419	48.2	6.15	403.22	10	89.8	103.6	85.9	110	111.5	100.6	128.2	94.7	75.7	8.83349e+07	1.01861e+08	8.44717e+07	1.08183e+08	1.09676e+08	9.89045e+07	1.26109e+08	9.31776e+07	7.44405e+07	6.58592e+07	9.21401e+07	8.06472e+07	8.18724e+07	7.37e+07	8.66863e+07	8.93105e+07	5.97735e+07	7.44405e+07	12	10	11	11	11	11	11	12
High	Q13547	histone deacetylase 1 [OS=Homo sapiens]	0	FALSE	214.649	54	17	113	12	482	55.1	5.48	371.27	17	108.6	138.8	113.5	88.4	89.9	100.5	72.6	87.7	100.1	4.72785e+07	6.03963e+07	4.94005e+07	3.84702e+07	39113871	4.37169e+07	3.15737e+07	3.81463e+07	4.35761e+07	3.52491e+07	5.46324e+07	4.71639e+07	2.9114e+07	2.62837e+07	3.83163e+07	2.23606e+07	2.44709e+07	4.35761e+07	9	12	11	7	8	13	8	8
High	P08559	Pyruvate dehydrogenase E1 component subunit alpha, somatic form, mitochondrial [OS=Homo sapiens]	0	FALSE	214.227	51	15	119	15	390	43.3	8.06	375.79	15	104.3	120.7	131.1	74.8	69.1	80.2	107.3	85.5	126.9	1.05177e+08	1.21747e+08	132239109	7.53903e+07	6.96863e+07	8.0894e+07	1.08238e+08	8.62549e+07	1.28e+08	7.84162e+07	1.10128e+08	1.26252e+08	5.70549e+07	4.68278e+07	7.09007e+07	7.66544e+07	5.53326e+07	1.28e+08	19	17	19	18	16	18	19	16
High	Q16401	26S proteasome non-ATPase regulatory subunit 5 [OS=Homo sapiens]	0	FALSE	213.692	65	22	145	22	504	56.2	5.48	522.23	22	108.3	91.4	94	115	113.7	112	88.2	91.7	85.7	1.32615e+08	1.11932e+08	1.15062e+08	140837326	1.39285e+08	1.3715e+08	1.07975e+08	1.12277e+08	1.04946e+08	9.88725e+07	1.0125e+08	1.09852e+08	1.06585e+08	9.35964e+07	120207175	7.64685e+07	7.2026e+07	1.04946e+08	20	22	23	22	21	24	23	21
High	P05198	Eukaryotic translation initiation factor 2 subunit 1 [OS=Homo sapiens]	0	FALSE	213.683	75	22	186	22	315	36.1	5.08	584.82	22	97.7	107.4	119.4	71.9	73.5	75.5	122.4	114.4	117.8	316547800	3.47886e+08	386972540	2.32796e+08	2.38235e+08	2.44677e+08	3.96391e+08	3.70645e+08	3.81652e+08	2.36006e+08	3.14686e+08	3.69452e+08	1.76178e+08	1.60089e+08	2.14451e+08	2.80725e+08	2.37769e+08	3.81652e+08	20	20	20	19	19	18	20	20
High	P46379-1	Large proline-rich protein BAG6 [OS=Homo sapiens]	0	FALSE	213.398	21	14	133	14	1132	119.3	5.6	545.31	14	88.9	89	90.8	102.8	121	105.6	104.7	101.8	95.3	7.95631e+07	7.96968e+07	8.13072e+07	9.20241e+07	1.08278e+08	9.45303e+07	9.37538e+07	9.11643e+07	8.52685e+07	5.93193e+07	7.2091e+07	7.7626e+07	6.96432e+07	7.27604e+07	8.28525e+07	6.63966e+07	5.8482e+07	8.52685e+07	16	19	17	16	17	16	16	16
High	P35998	26S proteasome regulatory subunit 7 [OS=Homo sapiens]	0	FALSE	213.147	63	23	159	23	433	48.6	5.95	525.06	23	124	123.9	121.3	75.5	81.9	81.8	109.5	89.2	92.9	1.95485e+08	1.95375e+08	1.91152e+08	1.18965e+08	129183827	1.28983e+08	1.72555e+08	1.40631e+08	1.46503e+08	1.45747e+08	1.7673e+08	1.82498e+08	9.00317e+07	8.68088e+07	1.13049e+08	1.22204e+08	9.02147e+07	1.46503e+08	22	24	24	22	20	22	21	21
High	P13804-1	Electron transfer flavoprotein subunit alpha, mitochondrial [OS=Homo sapiens]	0	FALSE	213.006	61	14	186	14	333	35.1	8.38	764.89	14	63.9	45.8	52.2	147	137.3	147.8	92.4	109.7	104	1.43732e+08	1.02956e+08	1.17347e+08	3.30656e+08	3.08811e+08	3.32457e+08	2.07914e+08	2.46724e+08	2.33974e+08	1.07161e+08	9.31301e+07	1.12034e+08	250238588	2.07515e+08	2.91387e+08	1.47245e+08	1.58274e+08	2.33974e+08	14	13	14	15	15	15	15	15
High	P46777	60S ribosomal protein L5 [OS=Homo sapiens]	0	FALSE	212.993	59	16	226	16	297	34.3	9.72	718.19	16	111.6	120.2	127.9	82.6	78.1	92.8	83.9	92.1	110.7	7.96682e+08	8.57587e+08	9.12975e+08	5.89353e+08	5.5746e+08	6.6252e+08	5.98945e+08	6.57014e+08	7.89642e+08	5.93976e+08	7.75744e+08	8.7164e+08	4.46018e+08	3.74602e+08	580675545	424174199	4.21475e+08	7.89642e+08	16	17	18	16	15	17	16	15
High	O94906-1	Pre-mRNA-processing factor 6 [OS=Homo sapiens]	0	FALSE	212.95	38	27	154	27	941	106.9	8.25	450.37	27	80.6	92.9	88.3	75.8	82	86.2	140.3	124.8	129.1	9.89698e+07	1.13965e+08	108392857	9.3066e+07	1.00648e+08	1.05759e+08	1.72133e+08	1.53188e+08	1.58433e+08	7.37882e+07	1.03088e+08	1.03485e+08	7.04318e+07	6.76335e+07	9.26943e+07	1.21905e+08	9.827e+07	1.58433e+08	21	24	25	24	23	24	25	23
High	P20290-1	transcription factor BTF3 [OS=Homo sapiens]	0	FALSE	212.906	56	8	98	8	206	22.2	9.38	407.31	8	84.9	84.5	108	89.4	79.9	79.5	141.8	127.6	104.4	8.88557e+07	8.84201e+07	1.13069e+08	9.36055e+07	8.36249e+07	8.32172e+07	1.48361e+08	1.33529e+08	1.0921e+08	6.62475e+07	7.99817e+07	107949400	7.084e+07	5.61942e+07	7.29369e+07	1.0507e+08	8.56587e+07	1.0921e+08	10	9	11	10	8	12	8	9
High	Q14498-2	Isoform 2 of RNA-binding protein 39 [OS=Homo sapiens]	0	FALSE	212.504	58	22	151	20	524	58.6	10.13	512.16	22	75.3	73	69.9	94.7	95.5	104.4	119.5	134.3	133.3	1.24979e+08	1.21267e+08	1.16117e+08	1.57349e+08	1.58583e+08	1.73309e+08	1.98495e+08	2.23102e+08	2.21423e+08	9.31795e+07	1.09694e+08	1.1086e+08	1.19081e+08	1.06564e+08	1.51899e+08	1.40575e+08	1.4312e+08	2.21423e+08	19	21	20	19	18	20	19	20
High	P28288	ATP-binding cassette sub-family D member 3 [OS=Homo sapiens]	0	FALSE	212.412	40	22	139	22	659	75.4	9.36	471.02	22	83.6	80.8	83.5	119.3	120.5	127.8	89.7	94.3	100.5	8.15895e+07	7.88051e+07	8.14965e+07	1.1641e+08	1.17608e+08	1.2476e+08	8.75525e+07	9.20396e+07	9.80585e+07	6.08301e+07	7.12843e+07	7.78067e+07	8.80985e+07	7.903e+07	1.09348e+08	6.20049e+07	5.90435e+07	9.80585e+07	23	22	22	23	22	22	21	22
High	O00116	Alkyldihydroxyacetonephosphate synthase, peroxisomal [OS=Homo sapiens]	0	FALSE	212.155	49	22	107	22	658	72.9	7.34	388.64	22	82.9	97.6	94.5	104	108.3	86.9	127.1	96.2	102.5	6.52719e+07	7.69031e+07	7.44244e+07	8.18992e+07	8.52976e+07	6.84605e+07	1.00075e+08	7.57928e+07	8.07262e+07	4.86643e+07	6.95638e+07	7.10548e+07	6.19808e+07	5.73182e+07	6.00032e+07	7.08737e+07	4.86211e+07	8.07262e+07	22	24	25	21	21	22	21	20
High	P07954	fumarate hydratase, mitochondrial [OS=Homo sapiens]	0	FALSE	212.117	50	16	120	16	510	54.6	8.76	494.36	16	72.2	80.4	100.3	90.2	92.7	106.5	111.9	96.5	149.2	5.83896e+07	6.50115e+07	8.10291e+07	7.28846e+07	7.49337e+07	8.60877e+07	9.04802e+07	7.80341e+07	1.2059e+08	4.35331e+07	5.88071e+07	7.73605e+07	5.51586e+07	5.03539e+07	7.54529e+07	6.40783e+07	5.00589e+07	1.2059e+08	16	15	16	16	16	17	15	14
High	Q14444-1	Caprin-1 [OS=Homo sapiens]	0	FALSE	212.001	23	12	144	12	709	78.3	5.25	559.35	12	71.6	92.2	89.9	95.8	83.8	107.3	130.6	107.2	121.7	118135360	152135269	1.48368e+08	1.58083e+08	1.38299e+08	1.77192e+08	2.15596e+08	1.77016e+08	2.00872e+08	8.80773e+07	1.37616e+08	1.41651e+08	119635954	9.29342e+07	1.55303e+08	152685885	1.13556e+08	2.00872e+08	13	15	13	15	14	14	15	13
High	Q9BR76	Coronin-1B [OS=Homo sapiens]	0	FALSE	211.892	55	16	141	16	489	54.2	5.88	457.69	16	57	109	53.6	149.2	183.8	134.2	63.6	83.3	66.3	1.47908e+08	2.83179e+08	139199363	3.87495e+08	4.77272e+08	348532297	1.65245e+08	2.1631e+08	1.72212e+08	1.10274e+08	2.56154e+08	1.32897e+08	2.93253e+08	3.20717e+08	3.05476e+08	1.17027e+08	1.38763e+08	1.72212e+08	19	20	20	18	18	20	19	15
High	P18085	ADP-ribosylation factor 4 [OS=Homo sapiens]	0	FALSE	211.879	78	14	175	9	180	20.5	7.14	636.44	14	105.5	93.2	92.1	114.5	115.8	102.6	90.2	96.1	90.1	5.51078e+07	4.86942e+07	4.80823e+07	5.9781e+07	6.0462e+07	5.35864e+07	4.71304e+07	5.01649e+07	4.70385e+07	4.10863e+07	4.40471e+07	4.59053e+07	4.52419e+07	4.06292e+07	4.69667e+07	3.33779e+07	3.21808e+07	4.70385e+07	11	10	12	11	10	12	11	9
High	P30740	Leukocyte elastase inhibitor [OS=Homo sapiens]	0	FALSE	211.75	52	16	174	15	379	42.7	6.28	590.45	16	50	45	42.9	188.2	184.5	165.4	69.3	78.2	76.7	1.60929e+08	1.44616e+08	1.37948e+08	605364448	5.93402e+08	5.31913e+08	2.22814e+08	2.51478e+08	2.46631e+08	1.19983e+08	1.30814e+08	1.31703e+08	4.58136e+08	398753778	4.66203e+08	1.57798e+08	1.61323e+08	2.46631e+08	14	13	13	14	13	15	13	14
High	Q8TE68-1	Epidermal growth factor receptor kinase substrate 8-like protein 1 [OS=Homo sapiens]	0	FALSE	211.66	45	24	81	24	723	80.2	6.04	288.85	24	5.8	6.8	5.9	313.3	312.9	246.1	2.1	4.3	2.7	5.00105e+06	5.86483e+06	5.05292e+06	2.68293e+08	2.67913e+08	2.10746e+08	1.77149e+06	3.67274e+06	2.31178e+06	3.7286e+06	5.30513e+06	4.82414e+06	2.03042e+08	1.80032e+08	1.84712e+08	1.25458e+06	2.35607e+06	2.31178e+06	6	11	9	23	22	23	5	5
High	P13995	Bifunctional methylenetetrahydrofolate dehydrogenase/cyclohydrolase, mitochondrial [OS=Homo sapiens]	0	FALSE	211.604	53	13	103	13	350	37.9	8.73	448.7	13	122.4	124.6	151.5	58.7	57.4	64.4	101.6	87.8	131.5	9.79909e+07	9.9763e+07	1.21272e+08	4.69948e+07	4.59738e+07	5.15784e+07	8.1296e+07	7.02345e+07	1.05242e+08	7.30584e+07	9.02421e+07	1.15781e+08	3.55653e+07	3.08934e+07	4.52066e+07	5.7574e+07	4.50555e+07	1.05242e+08	12	12	12	12	9	13	12	11
High	Q86V81	THO complex subunit 4 [OS=Homo sapiens]	0	FALSE	211.358	47	8	316	8	257	26.9	11.15	1016.36	8	103.9	94.9	117.3	71.2	71	69.6	120.6	125.1	126.3	3.86873e+08	3.53349e+08	4.36562e+08	2.65099e+08	2.64297e+08	2.59144e+08	4.48922e+08	4.6557e+08	4.69993e+08	2.88438e+08	3.19628e+08	4.16796e+08	2.00625e+08	1.77602e+08	2.27131e+08	3.17927e+08	2.98664e+08	4.69993e+08	11	11	12	12	11	11	11	11
High	P42345	Serine/threonine-protein kinase mTOR [OS=Homo sapiens]	0	FALSE	211.236	18	29	98	29	2549	288.7	7.17	319.04	29	100	73.3	83.5	104.8	125.2	82	125.7	116.7	88.9	3.75848e+07	2.75671e+07	3.13728e+07	3.93742e+07	4.70442e+07	3.083e+07	4.72297e+07	4.38583e+07	3.34022e+07	2.80218e+07	2.49362e+07	2.99524e+07	2.97981e+07	3.16127e+07	27021450	3.34482e+07	2.81351e+07	3.34022e+07	22	24	25	20	20	22	24	20
High	Q96HE7	ERO1-like protein alpha [OS=Homo sapiens]	0	FALSE	210.82	55	18	155	18	468	54.4	5.68	528.84	18	114.2	119.2	131.8	74.6	72.8	71.8	113.4	102.1	100.2	1.208e+08	1.26101e+08	1.39513e+08	7.89379e+07	7.70125e+07	7.60194e+07	1.19953e+08	1.08064e+08	1.06002e+08	9.0064e+07	1.14067e+08	1.33196e+08	5.97397e+07	51750810	6.66283e+07	8.49511e+07	6.9323e+07	1.06002e+08	17	19	18	18	16	18	17	16
High	O43592	Exportin-T [OS=Homo sapiens]	0	FALSE	210.635	41	23	94	23	962	109.9	5.39	325.37	23	57.5	61.7	62.5	101.4	92.3	110.5	118.8	131.7	163.6	2.20922e+07	2.37173e+07	2.40366e+07	3.89827e+07	3.54887e+07	4.24723e+07	4.56698e+07	5.06304e+07	6.29069e+07	1.64711e+07	2.14538e+07	2.29483e+07	29501828	2.38477e+07	3.72255e+07	3.23434e+07	3.24794e+07	6.29069e+07	16	21	17	21	18	20	21	20
High	P61247	40S ribosomal protein S3a [OS=Homo sapiens]	0	FALSE	210.576	57	21	307	21	264	29.9	9.73	909.85	21	101.1	107.5	114.7	88.7	88.1	99.8	96.9	97.8	105.5	1431734089	1522167622	1624824876	1256057195	1247546853	1414236419	1372197785	1385079841	1493572950	1067447533	1376899788	1551260183	9.50576e+08	8.38325e+08	1239528859	9.71794e+08	8.8853e+08	1493572950	24	24	25	24	24	24	24	22
High	P24534	Elongation factor 1-beta [OS=Homo sapiens]	0	FALSE	210.473	59	12	143	11	225	24.7	4.67	545.35	12	108.3	100.9	109.7	89.7	94.7	96.2	100.8	103.6	96.1	5.08903e+08	4.74075e+08	5.15284e+08	4.21239e+08	4.44723e+08	4.51894e+08	4.73376e+08	4.86388e+08	4.51357e+08	3.79419e+08	4.28831e+08	4.91955e+08	3.18791e+08	2.98845e+08	396069034	3.35246e+08	3.12018e+08	4.51357e+08	11	12	12	11	11	13	12	11
High	Q66K74	Microtubule-associated protein 1S [OS=Homo sapiens]	0	FALSE	210.42	35	18	124	18	1059	112.1	7.3	433.19	18	107.4	109.7	110.7	68.7	76.2	52.9	147.1	150	77.4	2.89369e+07	2.95491e+07	2.98098e+07	1.84924e+07	2.05226e+07	1.42359e+07	3.96183e+07	4.04065e+07	2.08398e+07	2.15743e+07	2.67291e+07	2.84602e+07	1.39949e+07	1.37908e+07	1.24773e+07	2.80578e+07	2.59208e+07	2.08398e+07	19	18	18	18	14	13	17	19
High	Q9UGI8	Testin [OS=Homo sapiens]	0	FALSE	210.122	61	21	102	21	421	48	7.68	351.68	21	80.8	121.8	104.9	85.9	82.9	104.5	103.2	86.6	129.4	7.64131e+07	1.15227e+08	9.9281e+07	8.12577e+07	7.8412e+07	9.88983e+07	9.76506e+07	8.1908e+07	1.2242e+08	5.69707e+07	1.0423e+08	9.4786e+07	6.14953e+07	5.26912e+07	8.66809e+07	6.91564e+07	5.2544e+07	1.2242e+08	18	18	19	16	13	17	17	15
High	Q92888-1	Rho guanine nucleotide exchange factor 1 [OS=Homo sapiens]	0	FALSE	210.065	38	30	127	30	912	102.4	5.66	404.22	30	60	60.7	59.2	179.1	187.3	162.4	68.2	67	56.2	4.45252e+07	4.50626e+07	4.39838e+07	1.32937e+08	139021000	1.20566e+08	5.06222e+07	4.9717e+07	4.17375e+07	3.31963e+07	4.07621e+07	4.19924e+07	1.00606e+08	9.34192e+07	1.05672e+08	3.58507e+07	3.18935e+07	4.17375e+07	21	25	24	28	27	26	24	20
High	O95573	long-chain-fatty-acid--CoA ligase 3 [OS=Homo sapiens]	0	FALSE	209.381	52	23	130	21	720	80.4	8.38	463.38	23	92.3	105	93.5	138.5	139.9	138.5	76.3	59.7	56.2	6.33932e+07	7.21697e+07	6.42554e+07	9.51773e+07	9.61186e+07	9.51397e+07	5.24163e+07	4.10377e+07	3.86263e+07	4.72636e+07	6.52822e+07	6.13462e+07	7.20296e+07	6.45897e+07	8.33867e+07	3.71213e+07	2.63257e+07	3.86263e+07	17	18	19	18	17	19	19	15
High	Q96C86	M7GpppX diphosphatase [OS=Homo sapiens]	0	FALSE	209.363	53	12	131	12	337	38.6	6.38	586.19	12	64.5	57	57.4	155.6	163	139.6	85.5	96.3	81.2	4.62191e+07	4.08201e+07	4.11711e+07	1.11482e+08	1.16791e+08	1.00081e+08	6.12667e+07	6.90054e+07	5.8166e+07	3.44592e+07	3.69245e+07	3.93071e+07	8.43687e+07	7.8481e+07	8.77176e+07	4.33892e+07	4.4267e+07	5.8166e+07	13	13	13	14	14	13	13	14
High	Q9HAV4	exportin-5 [OS=Homo sapiens]	0	FALSE	209.095	33	24	131	24	1204	136.2	5.8	429.68	24	98.3	93.7	110.7	79.7	75.9	78.1	109.9	142.8	110.8	5.59056e+07	5.32966e+07	6.29545e+07	4.53395e+07	4.3141e+07	4.44175e+07	6.24885e+07	81178512	6.2967e+07	4.16811e+07	4.82103e+07	6.01043e+07	3.43127e+07	2.89898e+07	3.89304e+07	4.42545e+07	52076070	6.2967e+07	25	24	26	20	20	24	24	22
High	P17980	26S proteasome regulatory subunit 6A [OS=Homo sapiens]	0	FALSE	208.968	56	21	168	21	439	49.2	5.24	599.08	21	98.1	105.1	107	78.9	75.5	94.8	117.6	92.2	130.8	1.07847e+08	1.15503e+08	1.1762e+08	8.67568e+07	8.29837e+07	1.04204e+08	1.2923e+08	1.01379e+08	1.43828e+08	8.04064e+07	1.0448e+08	1.12295e+08	6.5657e+07	5.57633e+07	9.13314e+07	9.15213e+07	6.50345e+07	1.43828e+08	20	21	23	20	19	22	21	19
High	O75116	Rho-associated protein kinase 2 [OS=Homo sapiens]	0	FALSE	208.626	29	28	109	25	1388	160.8	6.02	379.22	28	70.2	70	69.4	155.2	165.2	163.3	74.2	71.7	60.8	4.46981e+07	4.45404e+07	4.41647e+07	9.87661e+07	1.05189e+08	1.0396e+08	4.72564e+07	4.5624e+07	3.87099e+07	3.33252e+07	4.02897e+07	4.21652e+07	7.47455e+07	7.06846e+07	9.11177e+07	3.34671e+07	2.92678e+07	3.87099e+07	21	20	20	23	22	24	18	21
High	P37837	Transaldolase [OS=Homo sapiens]	0	FALSE	208.561	59	20	271	20	337	37.5	6.81	819.71	20	72.1	74.4	72.6	174	160.9	167.2	49.6	60	69.2	4.97618e+08	5.13388e+08	5.00532e+08	1200028891	1110155749	1153690631	3.41968e+08	4.13888e+08	4.77386e+08	3.71005e+08	4.64393e+08	4.7787e+08	9.08174e+08	7.46001e+08	1011169570	2.42183e+08	2.65509e+08	4.77386e+08	19	21	20	22	22	21	21	21
High	P05784	SWISS-PROT:P05784 Tax_Id=10090 Gene_Symbol=Krt18 Keratin, type I cytoskeletal 18	0	TRUE	208.483	33	14	454	3	423	47.5	5.33	1300.13	14	19.7	14.8	8	293.1	248.6	248.9	15.4	21.3	30.1	1.42677e+06	1.06784e+06	578202	2.11823e+07	1.79667e+07	1.79932e+07	1.11612e+06	1.54118e+06	2.17713e+06	1.06375e+06	965933	552024	1.60306e+07	1.20732e+07	1.57704e+07	790438	988667	2.17713e+06	2	3	2	2	3	3	2	3
High	sp		0	TRUE	208.417	42	16	104	1	526	59.6	7.39	375.36	16
High	P98179	RNA-binding protein 3 [OS=Homo sapiens]	0	FALSE	208.129	55	7	116	7	157	17.2	8.91	487.78	7	32.4	45	37.7	65.1	77	77.7	223.1	159.6	182.4	5.52595e+07	7.67533e+07	6.44071e+07	1.11173e+08	1.31495e+08	1.32733e+08	3.80883e+08	272537639	311369158	4.11994e+07	6.94283e+07	6.14911e+07	8.41349e+07	8.8362e+07	1.16336e+08	2.69742e+08	1.74833e+08	311369158	7	8	8	8	9	9	10	9
High	P50570-1	Dynamin-2 [OS=Homo sapiens]	0	FALSE	208.035	43	30	173	27	870	98	7.44	548.5	30	78.6	81.3	83.6	116.9	110.1	117.8	106.6	98.6	106.4	1.30523e+08	1.34929e+08	1.38818e+08	1.94132e+08	1.82903e+08	1.95637e+08	1.77059e+08	1.63762e+08	1.76746e+08	9.73131e+07	1.22052e+08	1.32533e+08	146917570	1.22907e+08	1.71469e+08	1.25394e+08	1.05054e+08	1.76746e+08	23	24	26	26	24	26	28	25
High	P62873	Guanine nucleotide-binding protein G(I)/G(S)/G(T) subunit beta-1 [OS=Homo sapiens]	0	FALSE	207.926	62	16	115	11	340	37.4	6	426.97	16	113.1	120.1	113	86.3	85.6	84.9	119.9	95.5	81.7	1.52589e+08	1.62088e+08	1.52519e+08	1.16437e+08	1.15464e+08	1.14539e+08	1.61882e+08	1.28859e+08	1.10269e+08	113764893	1.46619e+08	145613611	8.81188e+07	7.75897e+07	1.00389e+08	1.14645e+08	8.26629e+07	1.10269e+08	12	13	11	12	10	10	11	11
High	P39687	Acidic leucine-rich nuclear phosphoprotein 32 family member A [OS=Homo sapiens]	0	FALSE	207.729	49	13	255	8	249	28.6	4.09	929.38	13	92	73.7	86.4	126.3	131.5	108	102.5	118.1	61.5	250729494	2.0087e+08	235306395	3.44252e+08	3.5826e+08	2.94358e+08	2.79202e+08	3.21844e+08	1.67523e+08	1.86935e+08	1.817e+08	2.24653e+08	2.60528e+08	240743255	2.57995e+08	1.97732e+08	2.06463e+08	1.67523e+08	11	12	12	10	11	11	12	11
High	P42166	Lamina-associated polypeptide 2, isoform alpha [OS=Homo sapiens]	0	FALSE	207.289	49	19	110	15	694	75.4	7.66	398.26	19	80.5	80.7	93.9	83.8	78.9	92.2	149.2	128.5	112.3	4.27913e+07	4.28561e+07	4.9888e+07	4.45078e+07	4.19357e+07	4.90148e+07	7.92595e+07	6.82557e+07	5.9686e+07	3.19036e+07	3.87662e+07	4.76293e+07	3.36832e+07	2.81799e+07	4.29597e+07	5.61318e+07	4.37861e+07	5.9686e+07	14	14	15	13	11	15	13	14
High	P62826	GTP-binding nuclear protein RAN [OS=Homo sapiens]	0	FALSE	207.023	47	14	251	14	216	24.4	7.49	944.93	14	97.4	94.6	85.4	97.6	96.1	95.3	118.3	116.5	98.7	1646832064	1599496276	1443293662	1649237325	1624374426	1610802085	1999525946	1969623776	1668964419	1227816560	1446848594	1377947879	1248131883	1091545699	1411811805	1416069145	1263514976	1668964419	13	13	13	13	13	13	13	13
High	O14579-1	coatomer subunit epsilon [OS=Homo sapiens]	0	FALSE	206.72	74	15	102	15	308	34.5	5.12	393.54	15	85.4	81.9	76.4	128.3	116.6	128.9	73.8	97.5	111.2	5.18426e+07	4.96861e+07	4.64011e+07	7.78841e+07	7.07826e+07	7.82472e+07	4.48067e+07	5.91548e+07	6.74967e+07	3.86519e+07	4.49443e+07	4.43003e+07	5.89422e+07	4.75644e+07	6.8581e+07	3.17322e+07	3.79478e+07	6.74967e+07	12	11	12	14	13	13	13	13
High	Q6P996-1	Pyridoxal-dependent decarboxylase domain-containing protein 1 [OS=Homo sapiens]	0	FALSE	206.575	31	15	105	15	788	86.7	5.38	376.38	15	82.2	60.6	75.7	183.7	151.6	138.8	64.5	81.9	61	2.803e+07	2.06495e+07	2.58094e+07	6.26502e+07	5.17064e+07	4.73462e+07	2.19884e+07	2.79407e+07	2.08074e+07	2.08981e+07	1.86788e+07	2.46409e+07	4.74133e+07	3.47456e+07	4.14973e+07	1.55722e+07	1.7924e+07	2.08074e+07	14	13	14	13	12	13	13	12
High	Q7L576-1	cytoplasmic FMR1-interacting protein 1 [OS=Homo sapiens]	0	FALSE	206.467	30	31	141	20	1253	145.1	6.9	403.42	31	73.7	79.8	77.8	119.7	103.5	144.3	83.1	76	142.1	3.21367e+07	3.47867e+07	3.39423e+07	5.22123e+07	4.51334e+07	6.29399e+07	3.62347e+07	3.31584e+07	6.19886e+07	2.39599e+07	3.14668e+07	3.24055e+07	3.95139e+07	3.03287e+07	5.51646e+07	2.56615e+07	2.12712e+07	6.19886e+07	17	18	15	16	18	18	16	15
High	P52294	Importin subunit alpha-5 [OS=Homo sapiens]	0	FALSE	206.35	38	11	136	7	538	60.2	5.01	529.38	11	67.3	87.5	86.3	105.5	108.9	111.8	149.7	96.9	86.1	2.10112e+07	2.73104e+07	2.69434e+07	3.29202e+07	3.39828e+07	3.49096e+07	4.67332e+07	3.0237e+07	2.68794e+07	1.56651e+07	2.4704e+07	2.57235e+07	2.49138e+07	2.28357e+07	3.0597e+07	3.30966e+07	1.93971e+07	2.68794e+07	8	9	8	8	9	10	7	8
High	P43304	Glycerol-3-phosphate dehydrogenase, mitochondrial [OS=Homo sapiens]	0	FALSE	206.114	54	28	125	28	727	80.8	7.69	386.64	28	151.5	165.7	158	90.7	79.2	84.6	58.5	50.9	60.9	2.14662e+08	234775042	2.23814e+08	128500971	1.12258e+08	119919641	8.28701e+07	7.20568e+07	8.62705e+07	160043921	2.12369e+08	2.13681e+08	9.72487e+07	7.54353e+07	1.05105e+08	5.86888e+07	4.62245e+07	8.62705e+07	28	30	29	26	25	27	25	23
High	P16435	NADPH--cytochrome P450 reductase [OS=Homo sapiens]	0	FALSE	206.022	40	18	118	18	677	76.6	5.58	415.76	18	100.5	97.6	92.3	151	127.8	121.5	66.1	67.9	75.3	8.38154e+07	8.14258e+07	7.69853e+07	1.25969e+08	1.06641e+08	1.0133e+08	5.51109e+07	5.66809e+07	6.28494e+07	6.24897e+07	7.36549e+07	7.34998e+07	9.53325e+07	7.16606e+07	8.88123e+07	3.90296e+07	3.63608e+07	6.28494e+07	17	17	16	18	17	17	15	16
High	P29317	Ephrin type-A receptor 2 [OS=Homo sapiens]	0	FALSE	205.321	38	25	129	23	976	108.2	6.23	409.95	25	133.6	116	150.5	70.9	71.5	69.2	87.2	91.1	110	9.07646e+07	7.87961e+07	1.02251e+08	4.81321e+07	4.85891e+07	4.70204e+07	5.92614e+07	6.18762e+07	7.46952e+07	6.76707e+07	7.12762e+07	9.76215e+07	3.64261e+07	3.26508e+07	4.12118e+07	4.19691e+07	3.96936e+07	7.46952e+07	19	19	20	17	13	16	15	17
High	P52701	DNA mismatch repair protein MSH6 [OS=Homo sapiens]	0	FALSE	205.309	33	28	106	28	1360	152.7	6.9	318.7	28	79.7	74.5	70.9	70.7	76.2	79	151.6	149.7	147.6	4.46384e+07	4.1698e+07	3.97069e+07	3.95481e+07	4.26642e+07	4.42314e+07	8.48772e+07	8.38019e+07	8.26311e+07	3.32807e+07	3.77185e+07	3.79092e+07	2.99298e+07	2.86695e+07	3.87673e+07	6.01102e+07	5.3759e+07	8.26311e+07	20	23	22	21	18	24	23	19
High	P23229-1	integrin alpha-6 [OS=Homo sapiens]	0	FALSE	204.485	34	27	143	27	1130	126.5	6.61	436.37	27	64.5	60.9	66.8	126.1	126.5	119.4	112.5	124.3	98.9	9.56116e+07	9.0291e+07	9.89481e+07	1.86774e+08	1.87424e+08	176870080	1.66702e+08	1.84201e+08	1.46506e+08	7.12844e+07	8.16741e+07	9.44682e+07	1.41349e+08	125945245	1.5502e+08	1.18059e+08	118164764	1.46506e+08	22	23	24	26	24	25	25	25
High	Q9NR09	Baculoviral IAP repeat-containing protein 6 [OS=Homo sapiens]	0	FALSE	204.377	10	20	125	20	4857	529.9	6.05	337.31	20	116.6	76.9	90.8	96.6	105.2	84.2	115.9	100.1	113.7	1.99995e+07	1.31987e+07	1.55812e+07	1.65672e+07	1.80544e+07	1.44515e+07	1.98871e+07	1.71653e+07	1.94979e+07	1.49109e+07	1.19391e+07	1.48758e+07	1.25379e+07	1.21322e+07	1.26662e+07	1.40841e+07	1.10115e+07	1.94979e+07	17	17	18	18	18	19	19	16
High	O43252	bifunctional 3'-phosphoadenosine 5'-phosphosulfate synthase 1 [OS=Homo sapiens]	0	FALSE	204.236	48	19	94	19	624	70.8	6.86	385.79	19	192.3	192.4	181.1	76.8	71.6	66.8	29	44.9	45.1	1.06186e+08	1.06237e+08	1e+08	4.23807e+07	3.95205e+07	3.68689e+07	1.60063e+07	2.47639e+07	2.49218e+07	7.91685e+07	9.6098e+07	9.54727e+07	3.20734e+07	2.6557e+07	3.23143e+07	1.13357e+07	1.58861e+07	2.49218e+07	14	16	16	13	9	14	9	9
High	Q16822-1	Phosphoenolpyruvate carboxykinase [GTP], mitochondrial [OS=Homo sapiens]	0	FALSE	204.152	53	24	151	23	640	70.7	7.62	492.12	24	79.1	55.6	87.3	115.9	109.7	117.2	117.7	110.4	107.1	1.26281e+08	8.87824e+07	1.39455e+08	1.85148e+08	1.75124e+08	1.87159e+08	1.8789e+08	176298787	1.71029e+08	9.41505e+07	8.03094e+07	1.33141e+08	1.40119e+08	1.1768e+08	1.64038e+08	1.33064e+08	1.13096e+08	1.71029e+08	20	21	23	23	23	23	22	21
High	O00629	Importin subunit alpha-3 [OS=Homo sapiens]	0	FALSE	204.087	55	15	138	11	521	57.9	4.96	479.7	15	120.4	51.5	65	111	123.5	86.5	138.4	139.1	64.4	3.56805e+07	1.52662e+07	1.92773e+07	3.29067e+07	3.66097e+07	25646166	4.10265e+07	4.1238e+07	1.90911e+07	2.6602e+07	1.38092e+07	1.84045e+07	2.49036e+07	2.4601e+07	2.2478e+07	2.90551e+07	2.64542e+07	1.90911e+07	10	9	9	9	10	10	10	10
High	Q9Y2X3	Nucleolar protein 58 [OS=Homo sapiens]	0	FALSE	203.883	41	16	126	16	529	59.5	8.92	446.31	16	142.9	96.4	117.8	61.8	65.8	80.5	110.8	102.2	121.8	1.10044e+08	7.42587e+07	9.07313e+07	4.76105e+07	5.06959e+07	6.20198e+07	85338351	7.87539e+07	9.38268e+07	8.20449e+07	6.71718e+07	8.66234e+07	3.60313e+07	3.40666e+07	5.43582e+07	6.04368e+07	5.05206e+07	9.38268e+07	15	14	16	13	13	16	14	15
High	Q9Y265	RuvB-like 1 [OS=Homo sapiens]	0	FALSE	203.708	64	20	170	20	456	50.2	6.42	610.65	20	110.6	108.9	112.7	96.2	102.6	104.6	89.5	80.4	94.6	3.29833e+08	3.24667e+08	3.3608e+08	2.86824e+08	3.06131e+08	3.12112e+08	2.66838e+08	2.39838e+08	2.82065e+08	2.45911e+08	2.93683e+08	3.20864e+08	2.17066e+08	2.05714e+08	2.73555e+08	1.88975e+08	1.53856e+08	2.82065e+08	19	20	19	18	18	19	19	17
High	P05387	60S acidic ribosomal protein P2 [OS=Homo sapiens]	0	FALSE	203.645	97	10	203	9	115	11.7	4.54	847.66	10	117.3	116.1	101.3	88.2	96.3	95.7	106.6	92.6	85.8	8.72583e+08	8.63938e+08	7.5366e+08	656032176	7.16679e+08	7.11883e+08	7.92938e+08	688888184	638576967	6.50565e+08	7.81488e+08	7.19538e+08	4.96481e+08	4.81593e+08	6.23941e+08	5.6156e+08	4.41922e+08	638576967	9	9	9	10	10	10	9	9
High	O95757	Heat shock 70 kDa protein 4L [OS=Homo sapiens]	0	FALSE	203.544	46	27	135	23	839	94.5	5.88	460.39	27	95.3	97.1	91.9	117	118.7	122.5	128.9	71	57.6	8.47624e+07	8.63741e+07	8.1745e+07	1.04075e+08	1.05534e+08	1.08912e+08	114603956	6.31794e+07	5.12045e+07	6.31957e+07	7.8131e+07	7.80439e+07	7.87632e+07	7.09168e+07	9.54575e+07	8.11628e+07	4.05296e+07	5.12045e+07	22	23	22	22	22	23	22	20
High	Q9UIA9	exportin-7 [OS=Homo sapiens]	0	FALSE	203.412	33	22	89	22	1087	123.8	6.32	300.76	22	74.1	80.6	72.6	63.2	49.1	67.3	192.6	169.6	131	2.19841e+07	2.38999e+07	2.15365e+07	1.87634e+07	1.45639e+07	1.99517e+07	5.71257e+07	5.03167e+07	3.88662e+07	1.63906e+07	2.1619e+07	2.05614e+07	1.42e+07	9.78665e+06	1.7487e+07	4.04566e+07	3.22782e+07	3.88662e+07	19	20	18	16	14	17	19	19
High	Q15833-1	Syntaxin-binding protein 2 [OS=Homo sapiens]	0	FALSE	203.346	40	13	66	13	593	66.4	6.55	299.68	13	118.2	132.5	123.7	107.7	130.5	99.3	87.7	46.5	53.7	1.90965e+07	2.14114e+07	1.99837e+07	1.74061e+07	2.10863e+07	1.6047e+07	1.41758e+07	7.51582e+06	8.67923e+06	1.42376e+07	1.9368e+07	1.90789e+07	1.31728e+07	1.41696e+07	1.40646e+07	1.00393e+07	4.8214e+06	8.67923e+06	12	11	12	8	10	10	9	6
High	P53992	Protein transport protein sec24c [OS=Homo sapiens]	0	FALSE	203.183	26	18	145	17	1094	118.2	7.06	464.72	18	72.9	64.2	62.3	106.9	103.6	99.3	134	129.8	127	5.06574e+07	4.45696e+07	4.3261e+07	7.42499e+07	7.19717e+07	6.90063e+07	9.30862e+07	9.0197e+07	8.82469e+07	3.77683e+07	4.03161e+07	4.13023e+07	5.61918e+07	4.83635e+07	6.04816e+07	6.59239e+07	5.78614e+07	8.82469e+07	16	18	18	17	16	18	17	16
High	Q9ULC5-1	Long-chain-fatty-acid--CoA ligase 5 [OS=Homo sapiens]	0	FALSE	202.96	49	22	109	21	683	75.9	6.92	388.91	22	154.1	159.3	126	136	139.3	116.5	26.9	22.5	19.4	1.83983e+08	1.90212e+08	1.50411e+08	1.62398e+08	1.66276e+08	1.39166e+08	3.21435e+07	2.68748e+07	2.32045e+07	1.37171e+08	1.72059e+08	1.43601e+08	1.22902e+08	1.11734e+08	1.21974e+08	2.27641e+07	1.72402e+07	2.32045e+07	22	23	22	23	21	23	8	6
High	Q14690	Protein RRP5 homolog [OS=Homo sapiens]	0	FALSE	202.176	26	29	134	29	1871	208.6	8.87	426.89	29	196.3	126.9	133.5	59.2	61.2	67.4	80.3	98.2	77.2	1.55836e+08	1.00758e+08	105958118	4.69776e+07	4.86142e+07	5.34815e+07	6.37265e+07	7.79457e+07	6.1275e+07	1.16186e+08	9.11426e+07	1.01161e+08	3.55523e+07	3.26677e+07	4.68747e+07	4.51313e+07	5.00022e+07	6.1275e+07	23	22	24	19	19	25	24	23
High	sp		0	TRUE	201.944	67	26	50	8	412	46.6	4.81	159.92	26	888.5		5			6.5				4.97306e+07		279242			364494				3.70773e+07		266599			319466				7		1			1
High	P40926	Malate dehydrogenase, mitochondrial [OS=Homo sapiens]	0	FALSE	201.733	60	19	296	19	338	35.5	8.68	1033.46	19	109.9	98.2	98.3	106.7	103.4	107.3	96.8	90.4	88.9	1501228033	1340662744	1342444379	1457462456	1412013045	1465679328	1321837460	1233916875	1213949709	1119259626	1212716801	1281664593	1102997933	9.48843e+08	1284616773	9.36129e+08	7.91559e+08	1213949709	18	19	19	18	18	19	18	17
High	Q9NSD9	Phenylalanine--tRNA ligase beta subunit [OS=Homo sapiens]	0	FALSE	201.488	51	24	172	24	589	66.1	6.84	593.68	24	118.7	102.9	105.5	81.1	85.9	80.3	113.8	115.4	96.4	3.54813e+08	3.07455e+08	3.15272e+08	2.42479e+08	2.56612e+08	2.40019e+08	340156542	3.44946e+08	2.88099e+08	264535385	278112707	3.00998e+08	1.83506e+08	1.72438e+08	2.10368e+08	2.409e+08	2.21283e+08	2.88099e+08	24	24	23	22	22	22	23	22
High	Q92922	SWI/SNF complex subunit SMARCC1 [OS=Homo sapiens]	0	FALSE	201.373	28	18	102	10	1105	122.8	5.76	342.35	18	118.7	93.2	164.8	65.2	61.4	71.5	128.2	103.1	93.9	2.87967e+07	2.26002e+07	3.99572e+07	1.58232e+07	1.48965e+07	1.73368e+07	3.10851e+07	2.49909e+07	2.27676e+07	2.14698e+07	2.04433e+07	3.81482e+07	1.19749e+07	1.00101e+07	1.51951e+07	2.20145e+07	1.60317e+07	2.27676e+07	8	10	10	8	6	10	9	9
High	Q15020	Squamous cell carcinoma antigen recognized by T-cells 3 [OS=Homo sapiens]	0	FALSE	201.071	38	24	100	24	963	109.9	5.57	336.69	24	106.7	115.2	99.1	100.5	107.7	89.6	87	110.8	83.4	9.06606e+07	9.7944e+07	8.41967e+07	8.54234e+07	9.15573e+07	7.61678e+07	7.39879e+07	9.419e+07	7.08829e+07	6.75932e+07	8.85967e+07	8.03846e+07	6.46479e+07	6.15246e+07	6.67584e+07	5.23984e+07	6.0423e+07	7.08829e+07	22	23	22	21	19	21	23	17
High	O43684	Mitotic checkpoint protein BUB3 [OS=Homo sapiens]	0	FALSE	201.067	58	14	109	14	328	37.1	6.84	399.09	14	77.1	89.6	85.3	89.3	90.9	86.6	135.5	130.6	115	1.19193e+08	1.38462e+08	131811387	1.38089e+08	1.40497e+08	1.33831e+08	2.09455e+08	2.0194e+08	1.77823e+08	8.88659e+07	1.25248e+08	1.25844e+08	104504680	9.44107e+07	1.17298e+08	148336223	1.29545e+08	1.77823e+08	15	16	16	18	15	15	15	16
High	Q9H2U2	Inorganic pyrophosphatase 2, mitochondrial [OS=Homo sapiens]	0	FALSE	200.863	64	18	134	17	334	37.9	7.39	483.15	18	107.6	100.8	91.7	164.7	157.8	136.5	48.5	45.2	47.3	134042933	1.25645e+08	1.14194e+08	2.05208e+08	1.96574e+08	1.70067e+08	6.04287e+07	5.6291e+07	5.89101e+07	9.99374e+07	1.13654e+08	1.09024e+08	1.553e+08	132093626	1.49058e+08	4.27958e+07	3.61107e+07	5.89101e+07	15	16	16	14	17	17	14	11
High	Q96RP9	Elongation factor G, mitochondrial [OS=Homo sapiens]	0	FALSE	200.844	41	23	112	23	751	83.4	7.01	343.55	23	67.1	59.4	60.5	104.9	111.6	109.3	129.6	132.3	125.3	4.24436e+07	3.75454e+07	3.8249e+07	6.63444e+07	7.05662e+07	6.90902e+07	8.19034e+07	8.36399e+07	7.92013e+07	3.16444e+07	3.39622e+07	3.65173e+07	5.0209e+07	4.7419e+07	6.05551e+07	5.80042e+07	5.36551e+07	7.92013e+07	14	20	21	16	16	21	19	16
High	sp P12081	Histidine--tRNA ligase, cytoplasmic [OS=Homo sapiens]	0	TRUE	200.802	56	24	141	20	509	57.4	5.88	438.08	24	105.6	102.2	97.8	98.4	104	90.1	115.4	100.6	85.9	1.17656e+08	113916973	1.09024e+08	1.09707e+08	1.1589e+08	1.00461e+08	128597022	112120591	9.575e+07	8.77201e+07	1.03045e+08	1.04088e+08	8.30252e+07	7.78758e+07	8.80509e+07	9.10727e+07	7.19254e+07	9.575e+07	17	16	17	17	16	17	16	16
High	Q13057	Bifunctional coenzyme A synthase [OS=Homo sapiens]	0	FALSE	200.691	58	20	112	20	564	62.3	6.99	387.03	20	27.3	29.1	28.3	172.8	133	152.7	109.2	133.6	114	1.58732e+07	1.69601e+07	1.65012e+07	1.00641e+08	7.74815e+07	8.89389e+07	6.35752e+07	7.78053e+07	6.63901e+07	1.18345e+07	1.53416e+07	1.57541e+07	7.61648e+07	5.2066e+07	7.79518e+07	4.50241e+07	4.99122e+07	6.63901e+07	15	13	15	19	17	19	17	16
High	P06703	protein S100-A6 [OS=Homo sapiens]	0	FALSE	200.588	84	11	512	11	90	10.2	5.48	1683.75	11	81.9	100.9	78.6	177.2	127	107.5	72.1	86.7	68.2	9.19835e+08	1133232435	8.83046e+08	1990448046	1427394668	1207408867	8.09525e+08	9.74377e+08	7.66349e+08	6.85795e+08	1025082571	8.43066e+08	1506357897	9.59179e+08	1058251729	5.73308e+08	6.25063e+08	7.66349e+08	11	14	12	15	14	15	11	12
High	O95340	bifunctional 3'-phosphoadenosine 5'-phosphosulfate synthase 2 [OS=Homo sapiens]	0	FALSE	200.075	50	21	68	21	614	69.5	8.03	248.27	21	59.3	54.7	57.1	270.4	210.5	224.5	9.3	8	6.2	2.71935e+07	2.50911e+07	2.62069e+07	1.24015e+08	9.6542e+07	1.0299e+08	4.25878e+06	3.64969e+06	2.8594e+06	2.02745e+07	2.26965e+07	2.50204e+07	9.38536e+07	6.48742e+07	9.02674e+07	3.01608e+06	2.34128e+06	2.8594e+06	16	17	20	21	20	21	3	1
High	P17812	CTP synthase 1 [OS=Homo sapiens]	0	FALSE	200.021	61	24	133	22	591	66.6	6.46	430.4	24	79.3	71.1	73.8	98.2	98.9	100.2	122.2	139.4	116.7	1.42831e+08	1.28098e+08	1.32816e+08	1.76857e+08	1.7811e+08	1.80423e+08	2.20089e+08	2.51068e+08	210116214	1.0649e+08	1.15873e+08	1.26802e+08	133843998	1.19686e+08	1.58135e+08	1.55868e+08	161060604	210116214	21	22	23	22	20	21	22	21
High	Q9C0C2	182 kDa tankyrase-1-binding protein [OS=Homo sapiens]	0	FALSE	199.871	27	27	82	27	1729	181.7	4.86	275.83	27	52	41.5	44	190.1	184	191.4	72.1	68.7	56.2	2.60611e+07	2.08121e+07	2.20669e+07	9.53146e+07	9.22424e+07	9.59819e+07	3.61491e+07	3.44582e+07	2.81974e+07	1.94302e+07	1.88259e+07	2.10678e+07	7.21335e+07	6.1985e+07	8.41248e+07	2.56009e+07	2.2105e+07	2.81974e+07	17	16	17	23	24	23	21	19
High	A1L0T0	Acetolactate synthase-like protein [OS=Homo sapiens]	0	FALSE	199.796	46	12	67	12	632	67.8	8.15	259.77	12	126.5	137.2	129.2	69.4	53.6	67.3	168.5	60.2	88	2.62202e+07	2.84411e+07	2.67709e+07	1.43826e+07	1.11065e+07	1.39511e+07	3.49267e+07	1.24733e+07	1.82364e+07	1.95488e+07	2.57269e+07	2.55588e+07	1.08846e+07	7.46332e+06	1.22277e+07	2.47352e+07	8.00162e+06	1.82364e+07	14	14	13	12	9	11	12	9
High	Q9BQ52-1	Zinc phosphodiesterase ELAC protein 2 [OS=Homo sapiens]	0	FALSE	199.74	50	23	108	23	826	92.2	7.9	376.23	23	115.4	130.1	132.2	61.7	65.5	63.6	99.9	117.3	114.4	7.17084e+07	8.08605e+07	8.21471e+07	3.83458e+07	4.07138e+07	39510047	6.21183e+07	7.29224e+07	7.1096e+07	5.34631e+07	7.31436e+07	7.84278e+07	2.90198e+07	2.73588e+07	3.46292e+07	4.39924e+07	4.67798e+07	7.1096e+07	19	19	20	11	13	17	18	15
High	Q5JRX3	Presequence protease, mitochondrial [OS=Homo sapiens]	0	FALSE	199.612	38	23	93	23	1037	117.3	6.92	296.16	23	85.4	90.6	89.3	172.4	168.4	163.8	43	47.4	39.6	3.85724e+07	4.09284e+07	4.03259e+07	7.78411e+07	7.60497e+07	7.39765e+07	1.94185e+07	2.14093e+07	1.78724e+07	2.87582e+07	3.70224e+07	3.85002e+07	5.89096e+07	5.11038e+07	6.48378e+07	1.37522e+07	1.37341e+07	1.78724e+07	14	17	18	15	14	21	11	11
High	P30876	DNA-directed RNA polymerase II subunit RPB2 [OS=Homo sapiens]	0	FALSE	199.586	26	23	103	23	1174	133.8	6.87	330.73	23	116.7	105.4	96.1	71.6	75.4	71.7	113.5	120.1	129.4	7.40401e+07	6.69109e+07	6.10129e+07	4.54291e+07	4.78742e+07	4.55243e+07	7.20486e+07	7.62137e+07	8.21561e+07	5.52015e+07	6.05253e+07	5.82505e+07	3.43805e+07	3.21705e+07	3.99005e+07	5.1025e+07	4.88911e+07	8.21561e+07	23	24	23	22	19	22	23	19
High	O94826	Mitochondrial import receptor subunit TOM70 [OS=Homo sapiens]	0	FALSE	199.411	46	17	121	17	608	67.4	7.12	444.65	17	104.8	89	100.9	94.1	90.1	91.1	102.2	120.7	107.2	1.55984e+08	1.32581e+08	1.50214e+08	1.40092e+08	134220420	1.35612e+08	1.52113e+08	1.79675e+08	1.59551e+08	1.16296e+08	1.19928e+08	1.43413e+08	1.06021e+08	9.01933e+07	1.18859e+08	1.07727e+08	1.15261e+08	1.59551e+08	14	17	16	14	13	14	15	15
High	P45880	Voltage-dependent anion-selective channel protein 2 [OS=Homo sapiens]	0	FALSE	199.308	71	18	195	18	294	31.5	7.56	630.4	18	114.2	105.9	101.6	81.1	85.9	76.8	115.5	121.4	97.7	8.8379e+08	8.19675e+08	7.86495e+08	627258942	664937164	5.94016e+08	8.93461e+08	9.39603e+08	7.55742e+08	6.58921e+08	7.4145e+08	750885623	4.74705e+08	4.46824e+08	5.20634e+08	6.32751e+08	6.02756e+08	7.55742e+08	18	20	20	19	17	19	18	18
High	Q9UMR2-1	ATP-dependent RNA helicase DDX19B [OS=Homo sapiens]	0	FALSE	198.965	63	23	102	4	479	53.9	6.3	335.48	23	40.4	39	33.2	52.5	41.1	81.8	223.4	230.7	157.8	1.39118e+06	1.34306e+06	1.14521e+06	1.80921e+06	1.41495e+06	2.8171e+06	7.69437e+06	7.94688e+06	5.43622e+06	1.03721e+06	1.21489e+06	1.09336e+06	1.3692e+06	950815	2.46909e+06	5.44917e+06	5097930	5.43622e+06	2	2	2	2	2	3	3	4
High	Q13162	Peroxiredoxin-4 [OS=Homo sapiens]	0	FALSE	198.958	64	15	149	13	271	30.5	6.29	514.06	15	111.3	101.8	106.2	56.7	61.6	60.1	140.8	139.4	122	2.28915e+08	2.09526e+08	2.18606e+08	1.1669e+08	1.26826e+08	1.23605e+08	2.8969e+08	286812095	2.51116e+08	1.7067e+08	1.8953e+08	2.08708e+08	8.831e+07	8.52242e+07	1.08335e+08	2.05159e+08	1.8399e+08	2.51116e+08	12	13	12	12	12	11	13	13
High	P67936-2	Isoform 2 of Tropomyosin alpha-4 chain [OS=Homo sapiens]	0	FALSE	198.582	56	20	173	2	284	32.7	4.73	550.8	20	113.8	185.3	122.3	136.4	152	157.2	12.6	9.3	11.3	6.58259e+06	1.07218e+07	7.07634e+06	7.89051e+06	8.79715e+06	9.09488e+06	727314	538478	652902	4.90774e+06	9.6986e+06	6.75596e+06	5.97149e+06	5.9115e+06	7.97135e+06	515086	345434	652902	2	2	2	2	2	2	1	1
High	O75306	NADH dehydrogenase [ubiquinone] iron-sulfur protein 2, mitochondrial [OS=Homo sapiens]	0	FALSE	198.461	57	17	116	17	463	52.5	7.55	382.99	17	106.4	110.6	113.6	79.9	84.6	90	114.6	94	106.3	6.52763e+07	6.78642e+07	6.96586e+07	4.9006e+07	5.18644e+07	5.51784e+07	7.02989e+07	5.76686e+07	6.5189e+07	4.86676e+07	6.13876e+07	6.65048e+07	3.70874e+07	3.48518e+07	4.8362e+07	4.97858e+07	3.69945e+07	6.5189e+07	11	14	15	12	11	14	14	14
High	Q14376	UDP-glucose 4-epimerase [OS=Homo sapiens]	0	FALSE	197.85	69	15	107	15	348	38.3	6.73	439.08	15	108.9	131	131.5	145.9	120.9	147.6	37	28.8	48.4	6.12352e+07	7.36312e+07	7.39186e+07	8.20216e+07	6.79884e+07	8.29616e+07	2.07833e+07	1.61822e+07	2.7186e+07	4.56547e+07	6.66042e+07	7.05719e+07	6.20734e+07	4.56868e+07	7.2713e+07	14718796	1.03809e+07	2.7186e+07	14	14	14	14	13	14	11	10
High	P14550	alcohol dehydrogenase [NADP(+)] [OS=Homo sapiens]	0	FALSE	197.255	77	19	157	18	325	36.6	6.79	525.07	19	108.3	101.3	99	111.5	101.8	96.5	95.6	95.5	90.5	2.45927e+08	2.30143e+08	2.24791e+08	2.53223e+08	2.31331e+08	2.19125e+08	2.17258e+08	217041170	2.0557e+08	183354168	2.08179e+08	2.14614e+08	1.91638e+08	1.5545e+08	1.92055e+08	1.53862e+08	1.39232e+08	2.0557e+08	18	19	18	18	18	18	17	17
High	O15143	Actin-related protein 2/3 complex subunit 1B [OS=Homo sapiens]	0	FALSE	197.249	62	16	112	15	372	40.9	8.35	462.6	16	78.9	80.6	75.4	134.5	132.9	118.7	89.3	105.7	83.9	1.46041e+08	1.49263e+08	1.39657e+08	2.48968e+08	245949645	2.19802e+08	1.65356e+08	1.95576e+08	1.55333e+08	1.08883e+08	135017897	1.33334e+08	188417573	1.65273e+08	1.92649e+08	1.17105e+08	1.25462e+08	1.55333e+08	10	12	12	11	11	11	11	11
High	Q05397	Focal adhesion kinase 1 [OS=Homo sapiens]	0	FALSE	197.096	34	22	74	22	1052	119.2	6.62	241.62	22	109.4	121.8	123	149.8	139.4	149.1	35	37.8	34.8	3.64978e+07	4.06105e+07	4.10121e+07	4.99629e+07	4.65047e+07	4.97296e+07	1.16574e+07	1.26112e+07	1.15965e+07	2.72114e+07	3.67349e+07	3.91552e+07	3.78116e+07	3.12502e+07	4.35863e+07	8.25581e+06	8.09007e+06	1.15965e+07	15	17	16	15	15	16	9	9
High	P60891	ribose-phosphate pyrophosphokinase 1 [OS=Homo sapiens]	0	FALSE	196.756	70	17	165	9	318	34.8	6.98	546.31	17	68.8	67.2	76.3	56.5	72.9	48	140.3	237.2	132.7	2.98479e+07	2.91786e+07	3.31187e+07	2.45222e+07	3.16511e+07	2.08323e+07	6.08773e+07	1.02937e+08	5.75759e+07	2.22535e+07	2.63939e+07	3.16192e+07	1.85582e+07	2.12688e+07	1.82588e+07	4.31135e+07	6.60344e+07	5.75759e+07	8	7	10	7	9	8	7	9
High	O60218	Aldo-keto reductase family 1 member B10 [OS=Homo sapiens]	0	FALSE	196.74	73	16	101	16	316	36	7.84	323.35	16	3.5	3	3	275.1	319.7	286.7	2.9	3	3	1.03021e+07	8.88292e+06	8.88968e+06	8.04916e+08	935144205	8.38625e+08	8.56855e+06	8.74739e+06	8.80491e+06	7.68087e+06	8.03518e+06	8.4872e+06	6.09155e+08	6.28397e+08	7.35026e+08	6.06826e+06	5.61146e+06	8.80491e+06	3	4	2	17	18	17	3	1
High	P10768	S-formylglutathione hydrolase [OS=Homo sapiens]	0	FALSE	195.946	65	14	157	14	282	31.4	7.02	585.05	14	120.3	98.2	133.8	130.2	116.6	103.7	62.5	71.1	63.7	2.40835e+08	1.96533e+08	267924816	2.60628e+08	2.33347e+08	2.0748e+08	1.25086e+08	1.42256e+08	1.27435e+08	1.79557e+08	1.77777e+08	2.55794e+08	1.97242e+08	1.56804e+08	1.81849e+08	8.85865e+07	9.12575e+07	1.27435e+08	15	13	15	14	13	14	12	12
High	P42126	Enoyl-CoA delta isomerase 1, mitochondrial [OS=Homo sapiens]	0	FALSE	195.942	55	13	101	13	302	32.8	8.54	375.79	13	114.7	106.6	124.3	121.6	102.2	95.2	63.8	78.8	92.7	1.24164e+08	1.15404e+08	1.34537e+08	1.31537e+08	1.10591e+08	1.02989e+08	6.90715e+07	85255880	1.00357e+08	9.25723e+07	1.04391e+08	1.28446e+08	9.9546e+07	7.43146e+07	9.0266e+07	4.89166e+07	5.46917e+07	1.00357e+08	13	13	14	13	15	14	12	14
High	Q9BPW8	Protein NipSnap homolog 1 [OS=Homo sapiens]	0	FALSE	195.844	58	14	104	14	284	33.3	9.31	403.82	14	122.1	139.9	114.5	115	107.4	108.7	75	62.2	55.1	1.08876e+08	1.24729e+08	1.02089e+08	1.02512e+08	9.57674e+07	96891903	6.68783e+07	5.54514e+07	4.91312e+07	8.11737e+07	1.12826e+08	97466825	7.75805e+07	6.43537e+07	8.49224e+07	4.73634e+07	3.55721e+07	4.91312e+07	12	13	12	11	12	12	12	11
High	Q9UHD8-1	Septin-9 [OS=Homo sapiens]	0	FALSE	195.802	51	21	125	21	586	65.4	8.97	423.55	21	97.5	103.4	107.6	129.1	121.8	131.3	67.2	69.4	72.7	1.68278e+08	1.78341e+08	1.8566e+08	2.22781e+08	2.101e+08	226497331	1.15962e+08	119793209	1.25487e+08	1.25462e+08	1.61321e+08	1.77254e+08	1.68599e+08	1.41183e+08	198517005	8.21249e+07	7.68474e+07	1.25487e+08	21	24	23	22	20	23	20	20
High	P34931	Heat shock 70 kDa protein 1-like [OS=Homo sapiens]	0	FALSE	195.674	36	15	498	4	641	70.3	6.02	1083.42	15	109.2	69	48.5	104.9	143.2	78.8	158.3	152.7	35.3	7.48474e+06	4.72941e+06	3.32054e+06	7.18601e+06	9.81348e+06	5.40175e+06	1.08466e+07	1.04637e+07	2.41565e+06	5.58035e+06	4.27806e+06	3.1702e+06	5.43833e+06	6.59446e+06	4.73445e+06	7.68157e+06	6.71245e+06	2.41565e+06	3	3	2	3	3	3	2	2
High	P35573-1	glycogen debranching enzyme [OS=Homo sapiens]	0	FALSE	195.613	27	25	132	25	1532	174.7	6.76	447.6	25	99.7	102.8	93.3	127	126.9	103.7	88.1	72.3	86.2	5.23813e+07	5.39968e+07	4.90092e+07	6.67335e+07	6.66493e+07	5.44688e+07	4.62894e+07	3.79496e+07	4.52509e+07	3.90535e+07	4.88436e+07	4.67903e+07	5.05034e+07	4.47869e+07	4.774e+07	3.27823e+07	2.43447e+07	4.52509e+07	23	24	23	20	18	21	21	16
High	P40763	Signal transducer and activator of transcription 3 [OS=Homo sapiens]	0	FALSE	195.475	42	19	85	19	770	88	6.3	313.51	19	142.7	107.9	109.6	123.1	124	114.4	66.3	61.1	50.9	3.08176e+07	2.32849e+07	2.36601e+07	2.65812e+07	2.67769e+07	2.46958e+07	1.43119e+07	1.31813e+07	1.09984e+07	2.29765e+07	2.10627e+07	2.25889e+07	2.01165e+07	1.79935e+07	2.1645e+07	1.01357e+07	8.45583e+06	1.09984e+07	17	15	16	17	15	14	14	13
High	O15144	Actin-related protein 2/3 complex subunit 2 [OS=Homo sapiens]	0	FALSE	195.407	51	18	128	18	300	34.3	7.36	454.99	18	70	75.2	87.9	121.7	99.6	117.8	89.6	104.4	133.9	8.49996e+07	9.13438e+07	1.06731e+08	1.47808e+08	1.20906e+08	1.43016e+08	1.08837e+08	1.26753e+08	1.62647e+08	6.33725e+07	8.26265e+07	1.01898e+08	1.1186e+08	8.12466e+07	1.25349e+08	7.70787e+07	8.1312e+07	1.62647e+08	17	17	15	18	16	18	17	18
High	P49756-1	RNA-binding protein 25 [OS=Homo sapiens]	0	FALSE	194.952	25	17	108	17	843	100.1	6.32	359.22	17	108.1	111.8	103	76	67.2	75.6	139.3	106.1	113	9.04924e+07	9.35197e+07	8.61736e+07	6.36282e+07	5.6205e+07	6.32348e+07	1.16592e+08	8.87447e+07	94540446	6.74678e+07	8.45947e+07	8.22721e+07	4.81534e+07	3.77686e+07	5.54231e+07	8.25708e+07	5.69298e+07	94540446	18	18	18	18	16	16	19	19
High	P33992	DNA replication licensing factor mcm5 [OS=Homo sapiens]	0	FALSE	194.922	53	30	124	30	734	82.2	8.37	376.14	30	92.2	91.7	104.9	66.7	62.8	80.3	118.9	135.6	146.9	2.15049e+08	2.13942e+08	2.44759e+08	1.55583e+08	1.46451e+08	1.8732e+08	2.77273e+08	3.16257e+08	3.42586e+08	1.60333e+08	1.93524e+08	2.33677e+08	1.17744e+08	9.84122e+07	1.6418e+08	196365249	2.02879e+08	3.42586e+08	26	27	27	25	22	26	24	25
High	P12236	ADP/ATP translocase 3 [OS=Homo sapiens]	0	FALSE	194.289	54	18	561	4	298	32.8	9.74	1626.9	18	88.3	87.4	73	86	85.7	81	130.7	148	120	6.50365e+07	6.43044e+07	5.3733e+07	6.33278e+07	6.30611e+07	5.96129e+07	9.6217e+07	1.08932e+08	8.83261e+07	4.84888e+07	5.81675e+07	5.13002e+07	4.7926e+07	42375774	5.22486e+07	6.81411e+07	6.98801e+07	8.83261e+07	4	4	4	4	3	3	3	4
High	P00387	NADH-cytochrome b5 reductase 3 [OS=Homo sapiens]	0	FALSE	194.158	68	14	122	14	301	34.2	7.59	462.08	14	134.2	131.2	124.1	117.4	109	103.8	51.5	66	62.8	195664029	1.91234e+08	1.80933e+08	1.71155e+08	1.58957e+08	1.51356e+08	7.50826e+07	9.62054e+07	9.1501e+07	1.4588e+08	1.72984e+08	172741626	1.29529e+08	1.06816e+08	1.32658e+08	53173711	6.17158e+07	9.1501e+07	12	12	12	12	12	12	11	10
High	Q14315	Filamin-C [OS=Homo sapiens]	0	FALSE	194.032	17	30	120	22	2725	290.8	5.97	348.68	30	297.4	248.4	270.3	9.6	12.5	12.6	17.7	15.1	16.4	8.30542e+07	6.93697e+07	7.5485e+07	2.69324e+06	3.48119e+06	3.53235e+06	4.9515e+06	4.22004e+06	4.56716e+06	6.19221e+07	6.27494e+07	7.20674e+07	2.03823e+06	2339289	3.09598e+06	3.50667e+06	2.70716e+06	4.56716e+06	18	19	19	2	1	2	3	3
High	Q01105	Protein SET [OS=Homo sapiens]	0	FALSE	193.843	47	13	195	13	290	33.5	4.32	959.56	13	76.3	91.3	81.1	85.8	92.7	74.6	147.4	151.7	99.1	6.64292e+08	7.94898e+08	7.06252e+08	7.47047e+08	8.06417e+08	6.49232e+08	1282651145	1320139329	8.62186e+08	4.95272e+08	7.19037e+08	6.74276e+08	5.6536e+08	5.41895e+08	5.69029e+08	9.08377e+08	8.4687e+08	8.62186e+08	13	13	14	13	14	12	14	14
High	P24752	Acetyl-CoA acetyltransferase, mitochondrial [OS=Homo sapiens]	0	FALSE	193.839	60	19	144	19	427	45.2	8.85	505.38	19	126.1	114.1	112.9	51.7	50.4	49.1	140.9	129.3	125.6	2.69349e+08	2.4365e+08	241021092	1.10335e+08	1.0761e+08	1.0484e+08	3.00815e+08	2.76162e+08	2.68309e+08	200816667	2.20397e+08	2.30109e+08	8.35008e+07	7.23119e+07	9.18889e+07	2.13038e+08	177157896	2.68309e+08	16	18	17	13	12	14	14	14
High	Q9Y2L1-1	exosome complex exonuclease RRP44 [OS=Homo sapiens]	0	FALSE	193.755	40	25	105	25	958	108.9	7.14	360.84	25	72.9	78.4	79.3	88.1	99.7	97.9	146.1	120.3	117.2	6.19993e+07	6.66883e+07	6.74493e+07	7.48964e+07	8.47691e+07	8.32468e+07	1.24266e+08	1.02283e+08	9.97007e+07	4.62244e+07	6.03239e+07	6.43955e+07	5.66811e+07	5.69631e+07	7.29629e+07	8.80053e+07	6.56148e+07	9.97007e+07	20	21	22	21	21	22	22	23
High	P52948-1	nuclear pore complex protein Nup98-Nup96 [OS=Homo sapiens]	0	FALSE	193.394	20	24	110	24	1817	197.5	6.4	369.97	24	88.6	94.6	101.8	94.7	103.9	98.2	118.7	98	101.5	5.97536e+07	6.38441e+07	6.8662e+07	6.3883e+07	7.01009e+07	6.62755e+07	8.01074e+07	6.61146e+07	68493289	4.455e+07	5.77511e+07	6.55533e+07	4.83462e+07	4.71063e+07	5.80882e+07	5.67323e+07	4.24126e+07	68493289	22	22	23	22	23	24	24	22
High	P49591	Serine--tRNA ligase, cytoplasmic [OS=Homo sapiens]	0	FALSE	193.335	54	22	177	22	514	58.7	6.43	598.97	22	100.2	89.6	101.3	104.7	102.3	97.2	106.1	98.2	100.5	2.08162e+08	1.8615e+08	2.10409e+08	217607571	2.12585e+08	201946210	2.20394e+08	2.04102e+08	2.08775e+08	1.55198e+08	1.68385e+08	2.00883e+08	1.64684e+08	142852463	1.76999e+08	1.56084e+08	130931799	2.08775e+08	21	23	22	21	23	21	19	22
High	Q9UJS0	Calcium-binding mitochondrial carrier protein Aralar2 [OS=Homo sapiens]	0	FALSE	193.158	46	20	134	14	675	74.1	8.62	423.95	20	20.7	17.4	22.5	154.4	146.6	154.6	121.7	127.1	135.1	1.35818e+07	1.14045e+07	1.47773e+07	1.01412e+08	9.62532e+07	1.01544e+08	7.99584e+07	8.34578e+07	8.87074e+07	1.0126e+07	1.03161e+07	1.41083e+07	7.67476e+07	6.46801e+07	8.90002e+07	5.66268e+07	5.35383e+07	8.87074e+07	8	8	10	13	13	13	13	12
High	Q9UBB4-1	Ataxin-10 [OS=Homo sapiens]	0	FALSE	193.041	52	17	84	17	475	53.5	5.25	322.91	17	94.3	88.8	92.3	51.5	54.1	52.9	161.6	155.3	149.3	4.20516e+07	3.96013e+07	4.11947e+07	2.29883e+07	2.41304e+07	2.35908e+07	7.21092e+07	6.92699e+07	6.66095e+07	3.13521e+07	3.58219e+07	3.93295e+07	1.73974e+07	1.62151e+07	2.06765e+07	5.10679e+07	4.44367e+07	6.66095e+07	15	14	15	14	14	13	15	17
High	P11172	uridine 5'-monophosphate synthase [OS=Homo sapiens]	0	FALSE	192.413	53	17	118	17	480	52.2	7.24	416.93	17	95.7	87.1	76.4	125	128.1	124.7	90.3	86.9	85.9	9.66273e+07	8.79264e+07	7.71226e+07	1.26229e+08	1.2938e+08	1.2595e+08	9.12012e+07	8.77186e+07	8.67811e+07	7.20417e+07	7.95351e+07	73630824	9.55291e+07	8.69406e+07	1.10391e+08	6.45889e+07	5.62716e+07	8.67811e+07	17	16	17	16	18	18	13	14
High	P14735	insulin-degrading enzyme [OS=Homo sapiens]	0	FALSE	192.311	36	25	104	25	1019	117.9	6.61	333	25	95.1	85.2	89.1	80.5	86.8	91.2	125.1	116.6	130.4	9.73416e+07	8.72184e+07	9.12901e+07	8.24889e+07	8.89003e+07	9.34335e+07	128109767	1.19418e+08	133495535	7.25742e+07	7.88947e+07	8.71569e+07	6.24271e+07	5.97392e+07	8.18912e+07	9.07276e+07	7.6607e+07	133495535	22	19	22	21	19	23	22	22
High	Q12929	Epidermal growth factor receptor kinase substrate 8 [OS=Homo sapiens]	0	FALSE	192.233	37	19	75	19	822	91.8	7.5	256.85	19	49	68.3	65	113.1	125.7	172.1	82.3	121.8	102.5	1.54838e+07	2.15762e+07	2.05149e+07	3.57222e+07	3.96812e+07	5.43501e+07	2.59807e+07	3.84638e+07	32371742	1.15441e+07	1.95171e+07	1.95861e+07	2.70343e+07	2.66649e+07	4.7636e+07	1.83996e+07	2.46746e+07	32371742	12	17	17	15	11	19	13	13
High	P49790	Nuclear pore complex protein Nup153 [OS=Homo sapiens]	0	FALSE	192.152	27	23	95	23	1475	153.8	8.73	331.23	23	75.8	77	87.1	98.1	90	95.3	130.8	126.9	119.1	3.1889e+07	3.24098e+07	3.66389e+07	4.12819e+07	37856668	4.00994e+07	5.50406e+07	53393316	5.01101e+07	2.37753e+07	2.93168e+07	3.49801e+07	3.12418e+07	2.54389e+07	3.51458e+07	3.89799e+07	3.42518e+07	5.01101e+07	15	18	18	16	16	18	18	17
High	O43169	Cytochrome b5 type B [OS=Homo sapiens]	0	FALSE	191.703	80	10	98	10	146	16.3	4.97	384.14	10	164	264.1	176.8	30.9	34.6	32.3	80.3	58	58.9	2.47383e+08	3.98414e+08	2.66684e+08	4.66574e+07	5.22454e+07	4.86656e+07	1.21145e+08	8.75154e+07	8.88222e+07	1.84439e+08	3.60392e+08	2.5461e+08	3.531e+07	3.51078e+07	4.26537e+07	8.5795e+07	5.61412e+07	8.88222e+07	8	11	11	9	9	10	9	10
High	O95336	6-phosphogluconolactonase [OS=Homo sapiens]	0	FALSE	191.57	84	13	143	13	258	27.5	6.05	474.59	13	72.4	60.5	58.8	125.8	126.5	101.7	121.4	130.7	102.2	7.89551e+07	6.6042e+07	6.41544e+07	1.37234e+08	1.38025e+08	1.10941e+08	1.32442e+08	1.42564e+08	1.11519e+08	5.8866e+07	5.97393e+07	6.12498e+07	1.03858e+08	9.27497e+07	9.72357e+07	9.37956e+07	9.14548e+07	1.11519e+08	15	13	13	15	14	13	13	14
High	Q9NVI7-2	Isoform 2 of ATPase family AAA domain-containing protein 3A [OS=Homo sapiens]	0	FALSE	191.087	45	23	160	12	586	66.2	9.25	515.57	23	107	80.1	84.7	105	106.8	88	90.6	117.5	120.3	5.41364e+07	4.0544e+07	4.28347e+07	5.31091e+07	5.40128e+07	4.44969e+07	4.58416e+07	5.94661e+07	6.08867e+07	4.03621e+07	3.66746e+07	4.08953e+07	4.01926e+07	3.62955e+07	3.9e+07	3.24651e+07	3.81476e+07	6.08867e+07	11	11	10	10	11	10	11	10
High	P24928	DNA-directed RNA polymerase II subunit RPB1 [OS=Homo sapiens]	0	FALSE	191.063	20	25	96	25	1970	217	7.37	313.58	25	131.9	112.6	97.8	35.7	61.4	63.4	118.8	145.4	133	5.68565e+07	4.85281e+07	4.21406e+07	1.54026e+07	2.64842e+07	2.73315e+07	5.11891e+07	6.26714e+07	5.73121e+07	4.23901e+07	4.38968e+07	4.02327e+07	1.16566e+07	1.77968e+07	2.39551e+07	3.62523e+07	4.02038e+07	5.73121e+07	20	21	21	12	15	16	18	18
High	P09622	Dihydrolipoyl dehydrogenase, mitochondrial [OS=Homo sapiens]	0	FALSE	190.682	42	15	309	15	509	54.1	7.85	704.71	15	101	116.3	111.8	89.9	91.4	99.8	103	84.4	102.2	2.22178e+08	2.55769e+08	2.45958e+08	1.97715e+08	2.01098e+08	2.19437e+08	2.26588e+08	1.85612e+08	2.2484e+08	1.65648e+08	2.3136e+08	2.34822e+08	1.4963e+08	1.35134e+08	1.92329e+08	1.6047e+08	1.1907e+08	2.2484e+08	16	17	16	16	16	15	16	17
High	O15027-1	Protein transport protein Sec16A [OS=Homo sapiens]	0	FALSE	190.575	15	18	83	18	2179	233.4	5.63	295.65	18	50.4	50.3	62.4	141.7	139.9	143	102	112.3	97.9	1.65292e+07	1.64813e+07	2.04638e+07	4.6422e+07	4.58578e+07	4.68625e+07	33416868	3.68087e+07	3.20873e+07	1.23235e+07	1.49084e+07	1.95373e+07	3.51319e+07	3.08155e+07	4.10734e+07	2.36659e+07	2.36128e+07	3.20873e+07	11	14	16	16	17	17	16	15
High	Q9Y2Z0-1	Protein SGT1 homolog [OS=Homo sapiens]	0	FALSE	190.484	70	19	112	1	365	41	5.16	389.1	19	594.7	71.7	67.9	23.6	18.8	24.8	49.7	30.1	18.8	2.03841e+07	2.45698e+06	2.3263e+06	808932	644782	848474	1.70521e+06	1.03272e+06	643290	1.51976e+07	2.2225e+06	2.22097e+06	612195	433280	743658	1.20764e+06	662487	643290	1	1	1	1	1	1	1	1
High	Q15067-2	Isoform 2 of Peroxisomal acyl-coenzyme A oxidase 1 [OS=Homo sapiens]	0	FALSE	190.333	56	18	79	2	660	74.6	7.62	308.28	18	59.4	138.8	131.2	118.9	46.7	113.9	48.1	70	173	3.7844e+06	8.85025e+06	8.36594e+06	7.58096e+06	2.98024e+06	7.26334e+06	3.06544e+06	4.46277e+06	1.10288e+07	2.82151e+06	8.00563e+06	7.98717e+06	5.73722e+06	2.00266e+06	6366063	2.17095e+06	2.86287e+06	1.10288e+07	2	2	3	3	1	2	2	2
High	Q8IZL8	Proline-, glutamic acid- and leucine-rich protein 1 [OS=Homo sapiens]	0	FALSE	190.213	25	15	84	15	1130	119.6	4.34	317.85	15	85.5	86.4	78.7	71.3	82.4	72.1	125.1	158.9	139.7	3.41204e+07	3.44558e+07	3.13826e+07	2.84364e+07	3.28767e+07	2.87833e+07	4.99032e+07	6.34041e+07	5.57344e+07	2.54389e+07	3.11676e+07	2.99617e+07	2.15205e+07	2.20924e+07	2.52275e+07	3.53416e+07	4.06738e+07	5.57344e+07	11	13	13	10	11	12	12	11
High	P27694	Replication protein A 70 kDa DNA-binding subunit [OS=Homo sapiens]	0	FALSE	190.123	47	19	109	19	616	68.1	7.21	363.23	19	119.8	126.4	133.8	73.5	72.4	65.9	109.4	107.5	91.4	1.15862e+08	1.22252e+08	1.29391e+08	7.10948e+07	7.00684e+07	6.37763e+07	1.05787e+08	103943683	8.84106e+07	8.63822e+07	1.10585e+08	1.23533e+08	5.38041e+07	4.70845e+07	5.58977e+07	7.49185e+07	6.66799e+07	8.84106e+07	19	19	19	19	17	18	20	18
High	P18754-1	Regulator of chromosome condensation [OS=Homo sapiens]	0	FALSE	190.062	55	15	124	15	421	44.9	7.52	430.59	15	105	100	103.6	98.2	96	98.7	92.3	114.3	92	2.12876e+08	2.02746e+08	2.09982e+08	1.99143e+08	194594425	2.00036e+08	1.8713e+08	2.31823e+08	1.86468e+08	1.58713e+08	1.83397e+08	2.00475e+08	1.5071e+08	1.30763e+08	1.75325e+08	1.32526e+08	1.48714e+08	1.86468e+08	16	16	16	15	15	17	16	14
High	P21281	V-type proton ATPase subunit B, brain isoform [OS=Homo sapiens]	0	FALSE	189.94	48	16	108	13	511	56.5	5.81	388.71	16	114.3	112.1	109.5	41.3	40.8	47.8	163.3	135.2	135.6	4.75641e+07	4.66611e+07	4.5562e+07	1.71989e+07	1.696e+07	1.99057e+07	6.79338e+07	5.62641e+07	5.64053e+07	3.5462e+07	4.2208e+07	4.34992e+07	1.3016e+07	1.13968e+07	1.74466e+07	4.81109e+07	3.60935e+07	5.64053e+07	15	16	17	11	9	12	16	13
High	Q14247-1	Src substrate cortactin [OS=Homo sapiens]	0	FALSE	189.9	40	20	115	20	550	61.5	5.4	388.3	20	61.2	64.1	74.6	174.8	174.5	166.1	51.9	70.6	62.3	9.43946e+07	9.88392e+07	1.15045e+08	2.69768e+08	2.6921e+08	2.56268e+08	8.00242e+07	1.08975e+08	9.61446e+07	7.03771e+07	8.94065e+07	1.09837e+08	2.04158e+08	1.80904e+08	2.2461e+08	5.66733e+07	6.99073e+07	9.61446e+07	16	14	17	20	19	20	16	15
High	P54819	Adenylate kinase 2, mitochondrial [OS=Homo sapiens]	0	FALSE	189.728	64	12	169	12	239	26.5	7.81	682.28	12	83.9	81	87.9	89.6	84.4	79.8	128.3	144.4	120.7	2.77302e+08	2.68001e+08	2.90632e+08	2.96414e+08	2.79035e+08	2.63821e+08	4.24174e+08	4.77576e+08	3.99145e+08	2.06746e+08	2.42424e+08	2.77473e+08	2.24324e+08	1.87506e+08	2.3123e+08	3.00401e+08	3.06365e+08	3.99145e+08	12	13	12	12	11	12	13	13
High	P47756-2	Isoform 2 of F-actin-capping protein subunit beta [OS=Homo sapiens]	0	FALSE	189.568	67	16	358	16	272	30.6	6	1052.77	16	79.5	86.9	92	117.9	113.3	123	107.9	91.1	88.5	2.1074e+08	2.3041e+08	2.43943e+08	3.12747e+08	3.00458e+08	3.26348e+08	286247360	2.41518e+08	2.34679e+08	1.5712e+08	2.08421e+08	2.32899e+08	2.36685e+08	2.01901e+08	2.86032e+08	2.02721e+08	1.54934e+08	2.34679e+08	15	17	17	17	17	17	17	16
High	Q9UHD1	cysteine and histidine-rich domain-containing protein 1 [OS=Homo sapiens]	0	FALSE	189.417	56	13	102	13	332	37.5	7.87	358.75	13	127.3	158.7	140.5	44.9	38.4	45.4	119.9	109.5	115.5	1.41529e+08	176445222	1.5623e+08	4.99592e+07	4.26475e+07	5.04658e+07	1.33336e+08	1.21731e+08	1.28386e+08	1.05519e+08	1.59606e+08	1.49157e+08	3.78088e+07	2.86582e+07	4.42315e+07	9.44289e+07	7.80908e+07	1.28386e+08	12	14	13	10	9	11	12	12
High	O60568	Procollagen-lysine,2-oxoglutarate 5-dioxygenase 3 [OS=Homo sapiens]	0	FALSE	189.226	44	22	101	22	738	84.7	6.05	325.89	22	75.2	72.4	79.4	163.5	158.6	157	74	66.2	53.7	6.2859e+07	6.05277e+07	6.6354e+07	1.36692e+08	1.32648e+08	1.31309e+08	6.18652e+07	5.53831e+07	4.48773e+07	4.68654e+07	5.47512e+07	6.33498e+07	1.03448e+08	8.9137e+07	1.15088e+08	4.38131e+07	3.55283e+07	4.48773e+07	22	21	22	22	21	22	19	18
High	P15880	40S ribosomal protein S2 [OS=Homo sapiens]	0	FALSE	189.169	48	17	321	17	293	31.3	10.24	1080.34	17	100.6	97	105.4	90.8	97.9	99.8	95.6	111	101.9	9.20943e+08	887573938	9.64605e+08	8.3119e+08	8.96167e+08	9.13559e+08	8.74622e+08	1016279752	9.33036e+08	6.8662e+08	8.02868e+08	9.20932e+08	6.29039e+08	6.02206e+08	800702846	6.19409e+08	6.51944e+08	9.33036e+08	16	17	17	17	18	17	17	16
High	P49189	4-trimethylaminobutyraldehyde dehydrogenase [OS=Homo sapiens]	0	FALSE	189.06	43	12	88	12	494	53.8	5.87	309.38	12	124.4	128.3	104.6	117.6	105.3	105.7	71.4	73.7	68.9	1.08184e+08	111606834	9.09845e+07	102229088	9.16138e+07	9.1917e+07	6.21295e+07	6.40828e+07	5.99175e+07	8.06579e+07	1.00956e+08	8.68651e+07	7.73663e+07	6.15625e+07	8.0562e+07	4.40003e+07	4.11091e+07	5.99175e+07	13	16	15	14	10	15	11	11
High	O95782	AP-2 complex subunit alpha-1 [OS=Homo sapiens]	0	FALSE	189.034	40	25	128	18	977	107.5	7.03	388.51	25	146.1	118	135.8	95.8	99.1	93.1	64.3	78.3	69.6	9.07161e+07	7.32727e+07	8.43257e+07	5.94947e+07	6.15527e+07	5.78039e+07	3.99482e+07	4.86237e+07	43215046	6.76346e+07	6.62799e+07	8.05078e+07	4.50252e+07	4.13621e+07	5.06631e+07	2.82914e+07	3.11921e+07	43215046	15	15	17	17	15	15	14	13
High	P62333	26S proteasome regulatory subunit 10B [OS=Homo sapiens]	0	FALSE	188.781	64	21	132	21	389	44.1	7.49	450.6	21	85	106.8	115.1	74	74.9	88.3	130.2	94.1	131.6	1.33645e+08	167854767	1.80986e+08	1.16416e+08	1.17693e+08	1.38914e+08	2.04642e+08	147963728	206984584	9.96405e+07	1.51836e+08	1.72792e+08	8.8103e+07	7.90873e+07	1.21753e+08	1.44928e+08	9.49188e+07	206984584	20	20	21	21	19	20	22	19
High	P47895	Aldehyde dehydrogenase family 1 member A3 [OS=Homo sapiens]	0	FALSE	188.766	69	23	74	21	512	56.1	7.25	241.73	23	296.5	307.8	270.8	3.1	5.4	3.2	4.4	5.4	3.4	1.25241e+08	1.29987e+08	1.14358e+08	1.29238e+06	2.28597e+06	1.34293e+06	1.86102e+06	2.30044e+06	1.45067e+06	9.33751e+07	1.17582e+08	1.0918e+08	978065	1.53612e+06	1.17703e+06	1.31798e+06	1.47573e+06	1.45067e+06	19	20	20	2	4	2	3	3
High	Q14571-1	Inositol 1,4,5-trisphosphate receptor type 2 [OS=Homo sapiens]	0	FALSE	188.731	19	30	74	26	2701	307.9	6.43	210.88	30	15.7	23.1	5.9	30	37.3	34	244	257.8	252.3	2.68357e+06	3.9441e+06	1.0039e+06	5.12205e+06	6.37437e+06	5.80873e+06	4.17236e+07	4.40898e+07	4.31427e+07	2.00077e+06	3.56769e+06	958446	3.87634e+06	4.28345e+06	5.09115e+06	2.95487e+07	2.82837e+07	4.31427e+07	5	3	2	8	8	6	17	16
High	Q13098	COP9 signalosome complex subunit 1 [OS=Homo sapiens]	0	FALSE	188.555	48	17	116	17	491	55.5	6.74	350.6	17	96.5	81	88.1	89.8	104	83.9	120.3	129.4	107	4.95645e+07	4.15942e+07	4.52182e+07	4.61315e+07	5.33777e+07	4.30652e+07	6.17459e+07	6.64344e+07	5.49581e+07	3.69534e+07	3.76247e+07	4.3171e+07	3.4912e+07	3.58687e+07	3.77451e+07	4.37286e+07	4.26177e+07	5.49581e+07	16	13	14	17	16	15	17	18
High	P48735	Isocitrate dehydrogenase [NADP], mitochondrial [OS=Homo sapiens]	0	FALSE	188.45	54	20	199	19	452	50.9	8.69	603.39	20	52	50.1	43.4	204.4	187.7	190.4	55.8	54.5	61.8	1.39123e+08	1.34248e+08	1.16228e+08	5.47391e+08	5.02561e+08	5.09708e+08	1.49329e+08	1.45929e+08	1.65388e+08	1.03725e+08	1.21436e+08	1.10966e+08	414261801	3.37711e+08	4.46742e+08	1.05755e+08	9.36133e+07	1.65388e+08	15	17	16	19	18	19	17	16
High	Q92974	Rho guanine nucleotide exchange factor 2 [OS=Homo sapiens]	0	FALSE	188.381	26	17	112	17	986	111.5	7.27	404.59	17	63.6	53.9	56.5	111.6	114.5	127.5	116.8	114.9	140.7	3.86731e+07	3.27859e+07	3.43855e+07	6.79118e+07	6.96254e+07	7.75786e+07	7.10779e+07	6.987e+07	85566608	2.88332e+07	2.9657e+07	3.28286e+07	5.13952e+07	4.67868e+07	6.79949e+07	5.03375e+07	4.48217e+07	85566608	16	15	15	14	15	16	15	13
High	O14787-2	Isoform 2 of Transportin-2 [OS=Homo sapiens]	0	FALSE	188.307	41	19	127	13	887	100.3	4.98	368.59	19	111.3	129.4	175	57.3	33.6	52.1	68.2	135.2	138	6.93904e+06	8.06482e+06	1.09108e+07	3.57348e+06	2.09256e+06	3.24547e+06	4.25023e+06	8.4322e+06	8.60459e+06	5.17349e+06	7.29516e+06	1.04168e+07	2.70439e+06	1.40615e+06	2.84454e+06	3.01002e+06	5.40926e+06	8.60459e+06	13	12	15	11	8	11	12	12
High	P42330	Aldo-keto reductase family 1 member C3 [OS=Homo sapiens]	0	FALSE	188.154	62	18	103	14	323	36.8	7.94	364.67	18	4.4	3.4	2.5	215	241.8	195.9	90.9	70.1	75.9	5.64976e+06	4.28326e+06	3.25227e+06	2.74599e+08	3.08875e+08	250245303	1.16088e+08	8.95742e+07	9.68844e+07	4.21225e+06	3.87449e+06	3.10502e+06	2.07815e+08	207557294	2.19331e+08	8.22137e+07	5.74619e+07	9.68844e+07	2	2	2	13	13	12	12	11
High	Q92769	Histone deacetylase 2 [OS=Homo sapiens]	0	FALSE	187.851	53	15	105	10	488	55.3	5.91	353.07	15	71.5	113.3	118.2	48.6	24.5	55.7	125.2	99.5	243.5	1.10931e+07	1.75847e+07	1.83468e+07	7.54168e+06	3.80084e+06	8.64932e+06	1.94283e+07	1.54497e+07	3.77998e+07	8.27058e+06	1.59065e+07	1.75161e+07	5.70749e+06	2.55408e+06	7.58083e+06	13759137	9.91097e+06	3.77998e+07	5	8	9	6	3	6	7	6
High	Q96AE4	Far upstream element-binding protein 1 [OS=Homo sapiens]	0	FALSE	187.409	38	20	156	16	644	67.5	7.61	421.11	20	76.4	66.8	59.8	103.7	107.5	95.9	144.8	145.5	99.6	2.15669e+08	1.8835e+08	1.68866e+08	2.9267e+08	3.03193e+08	2.70605e+08	4.08602e+08	4.1051e+08	2.80914e+08	1.60795e+08	1.70375e+08	161220494	2.21491e+08	2.0374e+08	2.37176e+08	289373281	2.63342e+08	2.80914e+08	15	15	17	16	15	16	16	14
High	Q06323	Proteasome activator complex subunit 1 [OS=Homo sapiens]	0	FALSE	187.317	76	17	207	17	249	28.7	6.02	704.1	17	105.8	108.9	104	118.4	108.7	104	81.2	89.2	79.8	3.23605e+08	3.33254e+08	3.18116e+08	3.62263e+08	3.32498e+08	3.18169e+08	248421034	2.72813e+08	2.4426e+08	2.41267e+08	3.0145e+08	3.03713e+08	274158091	2.23432e+08	2.78864e+08	1.75932e+08	1.7501e+08	2.4426e+08	18	20	19	20	18	20	20	19
High	P07951-2	Isoform 2 of Tropomyosin beta chain [OS=Homo sapiens]	0	FALSE	187.265	58	23	177	2	284	33	4.67	533.67	23	177.9	110.3	178.7	53.6	34.4	56.2	120	95.7	73.2	3.91827e+06	2.42851e+06	3.93612e+06	1.18037e+06	758792	1.23818e+06	2.6443e+06	2.1077e+06	1.61211e+06	2.92132e+06	2.19675e+06	3.75791e+06	893293	509893	1.08522e+06	1.8727e+06	1.35209e+06	1.61211e+06	2	2	3	1	2	2	2	1
High	P48637	glutathione synthetase [OS=Homo sapiens]	0	FALSE	187.214	56	19	121	19	474	52.4	5.92	388.92	19	87.6	84.1	81	72.9	71.4	69.6	155.4	145.1	132.9	1.62604e+08	1.55975e+08	1.5038e+08	1.35285e+08	1.32441e+08	1.29117e+08	2.88382e+08	2.69308e+08	2.46604e+08	1.21232e+08	1.41089e+08	1.43572e+08	1.02382e+08	8.89974e+07	113166437	2.04233e+08	1.72761e+08	2.46604e+08	20	20	19	19	17	17	20	19
High	O00567	Nucleolar protein 56 [OS=Homo sapiens]	0	FALSE	186.517	47	21	134	21	594	66	9.19	433.74	21	147.1	107.9	104.3	54.9	67	67.7	112.1	131.2	107.8	2.30715e+08	1.6934e+08	1.63616e+08	8.613e+07	1.05052e+08	1.06252e+08	1.75898e+08	2.05803e+08	1.69112e+08	1.72012e+08	153178724	1.56208e+08	6.51826e+07	7.05926e+07	9.31259e+07	1.24571e+08	1.32023e+08	1.69112e+08	21	18	20	17	19	18	20	20
High	P62195-1	26S proteasome regulatory subunit 8 [OS=Homo sapiens]	0	FALSE	186.452	65	21	115	20	406	45.6	7.55	384.28	21	101.9	117.3	116	73.2	76.8	93.6	98.4	87.4	135.3	1.19781e+08	137873083	1.36384e+08	8.60687e+07	9.02818e+07	1.10024e+08	1.15622e+08	1.02784e+08	1.59004e+08	8.93039e+07	1.24715e+08	1.30209e+08	6.51362e+07	6.06675e+07	9.64319e+07	8.18834e+07	6.59357e+07	1.59004e+08	17	18	19	16	15	18	17	16
High	Q13177	Serine/threonine-protein kinase PAK 2 [OS=Homo sapiens]	0	FALSE	185.9	52	18	128	14	524	58	5.96	429.85	18	82.3	90.4	74.9	92	89.6	97.5	134.4	115.6	123.4	8.3051e+07	9.12516e+07	7.56354e+07	9.29073e+07	9.0439e+07	9.84765e+07	1.35678e+08	1.16728e+08	1.24596e+08	61919742	8.2543e+07	7.2211e+07	7.03116e+07	6.07731e+07	8.63112e+07	9.60873e+07	7.48813e+07	1.24596e+08	14	15	16	15	14	16	15	14
High	Q04446	1,4-alpha-glucan-branching enzyme [OS=Homo sapiens]	0	FALSE	185.876	39	17	69	17	702	80.4	6.32	215.22	17	101.3	128.7	145.8	15.7	11.7	16.4	171.1	132.2	177.2	3.42686e+07	4.35292e+07	4.93204e+07	5.304e+06	3.95532e+06	5.56302e+06	5.78603e+07	4.46997e+07	5.9924e+07	2.55494e+07	3.9375e+07	4.70874e+07	4.01403e+06	2.65789e+06	4.87579e+06	4.09768e+07	2.86749e+07	5.9924e+07	14	16	20	7	8	8	19	14
High	P07951-1	Tropomyosin beta chain [OS=Homo sapiens]	0	FALSE	185.78	52	23	169	2	284	32.8	4.7	500.65	23	66.3	62.8	73.9	39.4	42.6	54.2	172	205.1	183.7	1.22374e+06	1.16042e+06	1.36505e+06	728345	786488	1.00016e+06	3.17666e+06	3.78728e+06	3.39259e+06	912374	1.04968e+06	1.30325e+06	551207	528503	876606	2.24972e+06	2.42955e+06	3.39259e+06	1	1	1	1	1	1	1	1
High	P06753	Tropomyosin alpha-3 chain [OS=Homo sapiens]	0	FALSE	185.554	38	15	218	1	285	32.9	4.72	700.42	15
High	Q8NI27-1	THO complex subunit 2 [OS=Homo sapiens]	0	FALSE	185.483	21	26	133	26	1593	182.7	8.44	395.95	26	56.6	55.7	55.3	111.8	112.2	108.2	145.9	136.3	118.2	3.92316e+07	3.85823e+07	3.83108e+07	7.74155e+07	7.76946e+07	7.49314e+07	1.01045e+08	9.44012e+07	8.18577e+07	2.92496e+07	3.49002e+07	3.65762e+07	5.85876e+07	5.22091e+07	6.56747e+07	7.15603e+07	6.05584e+07	8.18577e+07	22	20	21	22	22	23	22	22
High	P55011	Solute carrier family 12 member 2 [OS=Homo sapiens]	0	FALSE	185.361	31	27	87	27	1212	131.4	6.4	279.55	27	16.5	23.1	21	263.7	220.4	242.1	36.3	37.5	39.4	1.19118e+07	1.66366e+07	1.5111e+07	1.89846e+08	1.5869e+08	1.7427e+08	2.6161e+07	2.69685e+07	2.83348e+07	8.88097e+06	1.50489e+07	1.44268e+07	1.43674e+08	1.06636e+08	1.52741e+08	18527251	1.73003e+07	2.83348e+07	10	16	12	25	22	24	17	16
High	Q14137	Ribosome biogenesis protein BOP1 [OS=Homo sapiens]	0	FALSE	185.313	31	13	91	13	746	83.6	6.19	340.93	13	210.4	90.4	143.8	64.2	55.1	42.5	129.6	94.9	69.1	5.40646e+07	2.3244e+07	3.69486e+07	1.65033e+07	1.41507e+07	1.09337e+07	3.33072e+07	2.43811e+07	1.77654e+07	4.03086e+07	2.10257e+07	3.52758e+07	1.24896e+07	9.50897e+06	9.58302e+06	2.35882e+07	1.56405e+07	1.77654e+07	11	11	12	9	10	7	12	9
High	Q9Y266	nuclear migration protein nudC [OS=Homo sapiens]	0	FALSE	185.257	53	13	158	13	331	38.2	5.38	507.16	13	104.9	122.3	108.6	81.1	86.6	84.2	89.9	103.4	118.9	2.65833e+08	3.09773e+08	2.7504e+08	2.05555e+08	2.1948e+08	2.13332e+08	2.27607e+08	2.62038e+08	3.01213e+08	1.98195e+08	2.8021e+08	2.62587e+08	1.55563e+08	1.47486e+08	1.86978e+08	1.61192e+08	1.68098e+08	3.01213e+08	19	20	21	15	14	19	16	15
High	Q13148-1	TAR DNA-binding protein 43 [OS=Homo sapiens]	0	FALSE	184.99	53	12	160	12	414	44.7	6.19	549.47	12	84.2	97.1	98.2	84.7	78.8	85.9	120	112.1	139	1.3251e+08	1.52859e+08	1.54569e+08	1.33351e+08	1.24087e+08	1.3522e+08	1.88864e+08	1.76427e+08	2.18891e+08	9.87945e+07	1.38271e+08	1.47571e+08	1.00919e+08	8.3384e+07	1.18516e+08	133753636	1.13178e+08	2.18891e+08	14	14	15	14	13	13	13	13
High	P30084	Enoyl-CoA hydratase, mitochondrial [OS=Homo sapiens]	0	FALSE	184.879	58	13	137	13	290	31.4	8.07	520.27	13	45.2	44.5	43.2	173.5	187.2	170.1	92.6	76.7	67	7.79464e+07	7.6728e+07	7.43815e+07	2.99069e+08	3.22649e+08	2.93244e+08	1.59682e+08	1.32153e+08	1.15482e+08	5.81139e+07	6.94055e+07	7.10138e+07	2.26333e+08	2.16813e+08	2.57018e+08	1.13087e+08	8.47765e+07	1.15482e+08	12	12	13	15	13	15	12	11
High	O94874-1	E3 UFM1-protein ligase 1 [OS=Homo sapiens]	0	FALSE	184.857	40	21	99	21	794	89.5	6.79	363.04	21	97.3	87.6	89.3	81.2	72.9	88.8	129.6	128.2	125.1	5.38295e+07	4.84536e+07	4.93875e+07	4.49219e+07	4.0316e+07	4.90943e+07	7.16865e+07	7.08944e+07	6.91753e+07	4.01333e+07	4.38294e+07	4.71515e+07	3.39966e+07	2.70915e+07	4.30294e+07	5.07686e+07	4.54788e+07	6.91753e+07	17	18	17	16	14	17	17	15
High	P09661	U2 small nuclear ribonucleoprotein A' [OS=Homo sapiens]	0	FALSE	184.834	63	14	165	14	255	28.4	8.62	513.29	14	117.8	103.6	104	84.7	84.7	78.2	117.1	118.6	91.3	1.69758e+08	149258781	149849083	1.22055e+08	1.22055e+08	1.12623e+08	1.68722e+08	1.70924e+08	1.31592e+08	1.26565e+08	1.35014e+08	1.43065e+08	9.23708e+07	8.20185e+07	9.87104e+07	1.19489e+08	1.09648e+08	1.31592e+08	16	17	17	17	15	17	15	15
High	O95299	NADH dehydrogenase [ubiquinone] 1 alpha subcomplex subunit 10, mitochondrial [OS=Homo sapiens]	0	FALSE	184.807	55	15	114	15	355	40.7	8.48	387.79	15	113.7	124.4	119.9	97.1	93.8	97.5	88.2	75.5	89.7	9.04873e+07	9.89773e+07	9.54299e+07	77257887	7.46351e+07	7.75645e+07	7.01904e+07	6.00939e+07	7.14028e+07	6.7464e+07	8.95314e+07	9.11092e+07	5.84683e+07	5.01532e+07	6.79826e+07	4.9709e+07	3.85503e+07	7.14028e+07	15	15	15	15	16	15	14	14
High	Q99436	Proteasome subunit beta type-7 [OS=Homo sapiens]	0	FALSE	184.757	56	13	103	13	277	29.9	7.68	371.67	13	103.2	101.1	103.1	101.2	95.5	90.3	116.3	91.2	98.1	7.20227e+07	7.06112e+07	7.20051e+07	7.06803e+07	6.6667e+07	6.30104e+07	8.12061e+07	6.36492e+07	6.84751e+07	5.36975e+07	6.38724e+07	6.87451e+07	5.34904e+07	4.47988e+07	5.52264e+07	5.75104e+07	4.0831e+07	6.84751e+07	12	14	12	13	14	13	13	13
High	P08754	Guanine nucleotide-binding protein G(k) subunit alpha [OS=Homo sapiens]	0	FALSE	184.526	63	19	125	13	354	40.5	5.69	410.44	19	80.3	89.5	82.9	117.8	126.9	117.8	112.4	95.3	77	2.81653e+07	3.13935e+07	2.90807e+07	4.13222e+07	4.44854e+07	4.13134e+07	3.94063e+07	3.34246e+07	2.7017e+07	2.0999e+07	28397469	2.7764e+07	3.12724e+07	2.98933e+07	3.62097e+07	2.79076e+07	2.14419e+07	2.7017e+07	12	11	11	13	11	12	11	11
High	P12955	xaa-Pro dipeptidase [OS=Homo sapiens]	0	FALSE	184.331	42	13	89	13	493	54.5	6	360.45	13	72.1	50	59.6	104.4	97.5	85	129.8	178.3	123.4	5.59928e+07	3.88705e+07	4.62788e+07	8.10802e+07	7.57633e+07	6.60072e+07	100837982	138496376	95868966	4.17461e+07	3.51609e+07	4.41835e+07	6.1361e+07	5.09114e+07	5.7853e+07	7.14137e+07	8.88455e+07	95868966	11	11	9	11	11	14	10	10
High	Q6IBS0	Twinfilin-2 [OS=Homo sapiens]	0	FALSE	184.188	53	12	109	11	349	39.5	6.84	433.86	12	147.5	137.7	110.8	82.9	87.7	83.8	93.4	77.5	78.8	8.45726e+07	7.89507e+07	6.35083e+07	4.75126e+07	5.0273e+07	4.80573e+07	5.35811e+07	4.44187e+07	4.51888e+07	6.30542e+07	7.14161e+07	6.0633e+07	3.59572e+07	3.37824e+07	4.21205e+07	3.79463e+07	2.84946e+07	4.51888e+07	10	10	10	7	8	9	9	9
High	P49902	Cytosolic purine 5'-nucleotidase [OS=Homo sapiens]	0	FALSE	183.997	41	13	96	13	561	64.9	6.14	358.33	13	102.2	90.7	91.6	147.5	148.7	115	86.9	68.7	48.7	3.61969e+07	3.21109e+07	3.2428e+07	5.22385e+07	5.26646e+07	4.07384e+07	3.07726e+07	2.43194e+07	1.72499e+07	2.69871e+07	2.90464e+07	3.09598e+07	3.95338e+07	3.53895e+07	3.57058e+07	2.17933e+07	1.56009e+07	1.72499e+07	13	13	13	11	12	13	13	12
High	Q6PKG0-1	La-related protein 1 [OS=Homo sapiens]	0	FALSE	183.935	31	23	107	20	1096	123.4	8.82	321.82	23	63.2	71.4	70.8	107.5	90.9	104.3	112.5	130.1	149.3	2.59298e+07	2.92786e+07	2.90174e+07	4.4091e+07	3.72582e+07	4.27824e+07	4.61398e+07	5.33522e+07	6.12087e+07	1.93323e+07	2.64844e+07	2.77036e+07	3.33677e+07	2.50367e+07	3.74972e+07	3.26763e+07	3.42255e+07	6.12087e+07	15	17	17	17	17	18	16	16
High	P22570	NADPH:adrenodoxin oxidoreductase, mitochondrial [OS=Homo sapiens]	0	FALSE	183.896	64	21	96	2	491	53.8	8.44	314.52	21	176	197.5	165.9	58.6	61.7	63.2	50.7	55.7	70.6	2.28367e+07	2.56256e+07	2.15235e+07	7.60306e+06	8.00646e+06	8.1966e+06	6.57542e+06	7.22351e+06	9.16134e+06	1.70262e+07	2.318e+07	2.05491e+07	5.75394e+06	5.38018e+06	7.18403e+06	4.65673e+06	4.63389e+06	9.16134e+06	2	2	2	2	2	2	2	2
High	O15042	U2 snRNP-associated SURP motif-containing protein [OS=Homo sapiens]	0	FALSE	183.753	33	23	118	23	1029	118.2	8.47	344.39	23	106.3	94.7	96.4	77.8	81.6	87.4	127.9	112.8	115.2	1.0345e+08	9.21644e+07	9.37656e+07	7.57354e+07	7.94099e+07	8.50419e+07	1.24485e+08	1.09734e+08	1.12069e+08	7.71284e+07	8.33687e+07	8.95203e+07	5.7316e+07	5.33618e+07	7.45362e+07	8.81608e+07	7.03946e+07	1.12069e+08	19	21	22	17	17	21	20	22
High	P61011-1	signal recognition particle 54 kDa protein [OS=Homo sapiens]	0	FALSE	183.751	49	15	80	15	504	55.7	8.75	328.67	15	79.4	95.7	111	75.8	67.6	79.1	120.4	106.7	164.3	3.44912e+07	4.15602e+07	4.81762e+07	3.28923e+07	2.93641e+07	3.43332e+07	5.22568e+07	4.6345e+07	7.13401e+07	2.57153e+07	3.75939e+07	4.5995e+07	2.48927e+07	1.9732e+07	3.00919e+07	3.70084e+07	2.97303e+07	7.13401e+07	14	14	13	14	12	13	12	14
High	Q14694	Ubiquitin carboxyl-terminal hydrolase 10 [OS=Homo sapiens]	0	FALSE	183.737	38	16	73	16	798	87.1	5.31	281.03	16	152.7	151.7	148.7	75.6	77.5	76.8	70.8	73.5	72.8	6.04529e+07	6.0063e+07	5.88727e+07	2.99439e+07	3.06855e+07	3.04007e+07	2.80366e+07	2.9088e+07	2.88124e+07	4.50714e+07	5.43309e+07	5.62072e+07	2.26613e+07	2.062e+07	2.66452e+07	1.98556e+07	1.866e+07	2.88124e+07	14	15	17	11	10	14	12	12
High	Q9Y2Z0-2	Isoform 2 of Protein SGT1 homolog [OS=Homo sapiens]	0	FALSE	183.669	78	19	109	1	333	37.8	5.21	365.15	19	90.9	159.4	88.6	37.1	99.5	81.2		277.8	65.5	935796	1.64185e+06	912639	381765	1.02423e+06	836134		2.86096e+06	674699	697695	1.48516e+06	871319	288917	688260	732842		1.83531e+06	674699	1	2	1	1	1	1		1
High	Q9P0J1-2	Isoform 2 of [Pyruvate dehydrogenase [acetyl-transferring]]-phosphatase 1, mitochondrial [OS=Homo sapiens]	0	FALSE	183.036	50	18	68	18	562	63.7	6.81	230.94	18	271.9	276.9	278.8	8	8.4	7.3	15.6	13.6	19.4	1.26767e+08	1.29098e+08	1.29976e+08	3.71707e+06	3.92075e+06	3.4162e+06	7.28402e+06	6.35152e+06	9.02092e+06	9.45128e+07	116777978	1.24091e+08	2.81306e+06	2.63466e+06	2.99418e+06	5.15856e+06	4.0745e+06	9.02092e+06	15	15	16	4	5	5	9	6
High	Q9H9B4	Sideroflexin-1 [OS=Homo sapiens]	0	FALSE	183.024	75	14	131	12	322	35.6	9.07	434.55	14	143.3	113.9	110.6	77.3	86.8	89	103.8	89.7	85.6	2.97682e+08	2.36594e+08	2.29862e+08	1.60597e+08	1.80358e+08	1.84866e+08	2.15567e+08	1.86352e+08	1.77783e+08	221940483	2.14014e+08	2.19455e+08	1.21539e+08	1.21197e+08	162028718	152665014	1.19545e+08	1.77783e+08	13	13	14	12	11	13	13	11
High	Q92688	Acidic leucine-rich nuclear phosphoprotein 32 family member B [OS=Homo sapiens]	0	FALSE	181.834	46	13	170	8	251	28.8	4.06	583.64	13	88.8	82	104.9	87	81	97.8	103.9	113.6	141	1.74112e+08	160791273	2.05596e+08	1.70448e+08	1.58708e+08	1.91623e+08	2.0365e+08	222686378	2.764e+08	1.29812e+08	1.45446e+08	1.96288e+08	128993719	1.06649e+08	1.67951e+08	1.44225e+08	1.42853e+08	2.764e+08	7	9	8	8	11	8	6	9
High	Q9H4M9	EH domain-containing protein 1 [OS=Homo sapiens]	0	FALSE	181.728	60	23	90	22	534	60.6	6.83	277.88	23	93.7	96.1	86.9	125.2	132.1	131.3	78.9	75.8	80	6.59086e+07	6.76531e+07	6.1161e+07	8.80897e+07	9.29259e+07	9.24267e+07	5.55058e+07	5.33465e+07	5.63189e+07	4.9139e+07	6.11966e+07	5.83919e+07	6.66657e+07	6.24443e+07	8.10088e+07	3.93094e+07	3.42218e+07	5.63189e+07	21	24	23	22	20	22	20	17
High	P06493	Cyclin-dependent kinase 1 [OS=Homo sapiens]	0	FALSE	181.564	68	17	138	16	297	34.1	8.4	444.54	17	66.2	79.5	73	68.1	81.1	75.6	161.3	162.1	133.1	8.96652e+07	1.07576e+08	9.88225e+07	9.2161e+07	1.09777e+08	1.0237e+08	2.18309e+08	219359426	180228197	6.6851e+07	9.73091e+07	9.43483e+07	6.97469e+07	7.3768e+07	8.97236e+07	1.54607e+08	1.40719e+08	180228197	14	14	14	13	14	14	15	14
High	P63096-1	Guanine nucleotide-binding protein G(i) subunit alpha-1 [OS=Homo sapiens]	0	FALSE	181.47	56	19	118	10	354	40.3	5.97	354.96	19	196.1	192.3	189.5	77	81.4	74.4	43.3	20.1	25.8	3.98918e+07	3.91185e+07	3.85504e+07	1.56576e+07	1.65567e+07	1.51325e+07	8.8108e+06	4.08533e+06	5.2512e+06	2.97418e+07	3.53852e+07	3.6805e+07	1.18496e+07	1.11258e+07	1.32631e+07	6.23983e+06	2.62074e+06	5.2512e+06	10	10	8	8	8	8	7	3
High	Q69YN4	protein virilizer homolog [OS=Homo sapiens]	0	FALSE	181.423	22	21	78	21	1812	201.9	5.01	265.46	21	109.1	79.5	120.8	60.2	62.4	69.8	131	124.2	143.1	1.25271e+07	9.1263e+06	1.38661e+07	6.9092e+06	7.15961e+06	8.01884e+06	1.5044e+07	1.42662e+07	1.64259e+07	9.33977e+06	8.25534e+06	1.32383e+07	5.22884e+06	4.81111e+06	7.02824e+06	1.06542e+07	9.15177e+06	1.64259e+07	16	17	18	14	13	17	19	15
High	O14981	TATA-binding protein-associated factor 172 [OS=Homo sapiens]	0	FALSE	181.399	19	17	64	17	1849	206.8	6.52	192.2	17	113.6	107.5	106.3	46.2	39.1	48.2	155.6	155.5	128	1.37015e+07	1.29599e+07	1.28134e+07	5.57497e+06	4.71935e+06	5.80598e+06	1.87555e+07	1.87483e+07	1.54264e+07	1.02154e+07	1.17231e+07	1.22333e+07	4.2191e+06	3.17131e+06	5.08874e+06	1.32827e+07	1.2027e+07	1.54264e+07	16	14	14	9	7	11	14	15
High	O00264	Membrane-associated progesterone receptor component 1 [OS=Homo sapiens]	0	FALSE	181.329	88	14	104	13	195	21.7	4.7	385.33	14	74.1	71.5	74.6	117.5	111.2	110.2	120.3	120.4	100.4	1.11576e+08	1.07658e+08	1.12341e+08	1.76901e+08	1.67447e+08	1.65888e+08	181093853	1.81244e+08	1.51172e+08	8.31866e+07	9.73836e+07	1.07255e+08	1.33878e+08	1.12521e+08	1.45395e+08	1.28251e+08	1.16268e+08	1.51172e+08	11	11	11	13	11	10	13	12
High	P00492	Hypoxanthine-guanine phosphoribosyltransferase [OS=Homo sapiens]	0	FALSE	181.172	79	16	138	16	218	24.6	6.68	448.87	16	76	87	85.4	60.1	58.1	68.8	152.3	142.9	169.4	1.29846e+08	148661558	1.45997e+08	1.02666e+08	9.93609e+07	1.17664e+08	2.60405e+08	2.44334e+08	2.89686e+08	9.68081e+07	134474065	1.39387e+08	7.7697e+07	6.67684e+07	1.03128e+08	184419488	1.5674e+08	2.89686e+08	15	17	17	15	16	18	17	18
High	O14818-1	Proteasome subunit alpha type-7 [OS=Homo sapiens]	0	FALSE	180.931	57	13	155	13	248	27.9	8.46	592.05	13	95.3	102.1	96.5	99	105.5	102.7	119.5	97.8	81.7	2.40901e+08	257901929	2.43864e+08	2.50256e+08	2.66516e+08	2.5948e+08	3.01961e+08	2.47146e+08	2.06363e+08	1.79607e+08	233289098	232823257	1.89392e+08	1.79093e+08	2.27425e+08	2.1385e+08	1.58544e+08	2.06363e+08	14	13	13	14	14	14	13	13
High	P54578	Ubiquitin carboxyl-terminal hydrolase 14 [OS=Homo sapiens]	0	FALSE	180.913	54	17	109	17	494	56	5.3	377.65	17	63.2	64.2	70	142.7	145.5	131.2	98	98.1	87.3	1.05082e+08	1.06717e+08	1.16346e+08	2.37197e+08	2.41848e+08	2.18124e+08	1.62957e+08	1.63085e+08	1.45114e+08	7.83451e+07	9.65324e+07	1.11078e+08	1.79509e+08	1.62517e+08	1.91178e+08	1.15406e+08	1.04619e+08	1.45114e+08	16	16	17	18	16	17	15	15
High	P14868	Aspartate--tRNA ligase, cytoplasmic [OS=Homo sapiens]	0	FALSE	180.409	59	25	200	25	501	57.1	6.55	607.9	25	97.3	97.6	119.7	80.4	80.6	78.4	106.1	137.9	102	3.76109e+08	3.77414e+08	4.6264e+08	3.10617e+08	3.11585e+08	3.02929e+08	4.10067e+08	5.32902e+08	3.9431e+08	2.80413e+08	3.41395e+08	4.41693e+08	2.35073e+08	2.09378e+08	2.65507e+08	2.9041e+08	3.41857e+08	3.9431e+08	22	23	24	22	20	23	23	21
High	O75608	Acyl-protein thioesterase 1 [OS=Homo sapiens]	0	FALSE	180.03	78	10	62	10	230	24.7	6.77	240.55	10	56.8	61.5	77.3	159.8	146.7	142.7	92.5	101.3	61.4	5.23867e+07	5.66972e+07	7.12857e+07	1.47454e+08	1.35369e+08	1.31606e+08	8.53337e+07	9.34161e+07	5.66607e+07	3.90575e+07	51286319	6.80582e+07	1.11592e+08	9.09649e+07	1.15348e+08	6.04336e+07	5.99265e+07	5.66607e+07	8	9	8	8	8	9	7	8
High	Q16836-1	Hydroxyacyl-coenzyme A dehydrogenase, mitochondrial [OS=Homo sapiens]	0	FALSE	179.974	61	10	98	10	314	34.3	8.85	379.14	10	67.6	68	83.6	164.6	113.9	174.2	63.3	51.3	113.5	5.23133e+07	5.26119e+07	6.46756e+07	127332538	8.80914e+07	1.34751e+08	4.89524e+07	3.96804e+07	8.78371e+07	3.90028e+07	4.75909e+07	6.17473e+07	9.63644e+07	5.91956e+07	1.18105e+08	3.46682e+07	2.5455e+07	8.78371e+07	12	10	10	12	14	11	11	11
High	P43490	nicotinamide phosphoribosyltransferase [OS=Homo sapiens]	0	FALSE	179.904	64	18	139	18	491	55.5	7.15	459.54	18	104.5	70.5	88.8	122.9	142.2	132.6	88.5	83.9	65.9	1.92933e+08	1.30154e+08	1.64006e+08	2.26942e+08	2.62575e+08	2.44747e+08	1.63459e+08	1.5495e+08	1.21677e+08	1.43844e+08	1.17733e+08	156580376	1.71748e+08	1.76445e+08	2.14512e+08	1.15762e+08	9.94008e+07	1.21677e+08	17	16	16	16	16	16	16	19
High	Q9Y5L0-1	Isoform 1 of Transportin-3 [OS=Homo sapiens]	0	FALSE	179.805	28	14	112	14	957	107.9	5.71	397.83	14	84.3	84.4	91.3	115.8	113.8	100.8	96.1	120.9	92.6	2.91799e+07	2.92207e+07	3.15841e+07	4.0075e+07	3.94048e+07	3.48992e+07	3.3257e+07	4.18299e+07	3.20575e+07	2.17554e+07	2.64321e+07	3.01541e+07	3.03285e+07	2.64792e+07	3.05879e+07	2.35527e+07	2.68339e+07	3.20575e+07	12	14	15	14	15	13	16	15
High	Q9UDY2	Tight junction protein ZO-2 [OS=Homo sapiens]	0	FALSE	179.659	24	21	95	21	1190	133.9	7.4	310.52	21	25.4	24.4	27.4	203	186.2	198.5	76.5	77.6	80.8	2.0013e+07	1.92365e+07	2.15697e+07	1.5976e+08	1.4651e+08	1.56224e+08	6.02183e+07	6.10663e+07	6.35854e+07	1.4921e+07	1.74006e+07	2.05931e+07	1.20906e+08	9.84518e+07	1.36925e+08	4.26468e+07	3.91741e+07	6.35854e+07	12	15	15	23	21	21	22	22
High	P05534	HLA class I histocompatibility antigen, A-24 alpha chain [OS=Homo sapiens]	0	FALSE	179.614	55	15	105	3	365	40.7	6.34	359.71	15				81.3	95.8	96.6	269.5	193.4	163.4				7.40723e+06	8.72972e+06	8.80603e+06	2.45577e+07	1.76241e+07	1.48872e+07				5.60574e+06	5.86619e+06	7718178	1.73918e+07	1.13059e+07	1.48872e+07				2	2	2	3	3
High	Q9Y6E0-2	Isoform A of Serine/threonine-protein kinase 24 [OS=Homo sapiens]	0	FALSE	179.61	53	17	130	10	431	47.9	5.43	452.96	17	71.9	82.5	83	106.8	115.9	98.4	128.6	110.1	102.8	4.24894e+07	4.87791e+07	4.9057e+07	6.31201e+07	6.85108e+07	5.81842e+07	7.60464e+07	6.51109e+07	6.07853e+07	3.16785e+07	4.41239e+07	4.68359e+07	4.77688e+07	4.60378e+07	5.09964e+07	5.38562e+07	4.17687e+07	6.07853e+07	8	9	10	10	9	9	10	10
High	Q14738-1	Serine/threonine-protein phosphatase 2A 56 kDa regulatory subunit delta isoform [OS=Homo sapiens]	0	FALSE	179.444	39	13	93	7	602	69.9	8.13	298.3	13	92.7	125.8	138	93.1	60.1	131	63.7	51.1	144.4	1.09385e+07	1.48492e+07	1.62904e+07	1.09873e+07	7.09411e+06	1.54662e+07	7.52042e+06	6.03429e+06	1.70388e+07	8.15537e+06	1.34321e+07	1.55529e+07	8.31512e+06	4.76709e+06	1.35556e+07	5.32598e+06	3.871e+06	1.70388e+07	7	8	7	6	6	6	6	6
High	Q07157	Tight junction protein ZO-1 [OS=Homo sapiens]	0	FALSE	179.431	23	25	123	25	1748	195.3	6.7	370.86	25	104	65.4	65.7	127	169.6	144.9	82.5	81.6	59.3	6.09282e+07	3.83217e+07	3.84694e+07	7.4438e+07	9.93741e+07	8.49174e+07	4.83133e+07	4.77939e+07	3.47594e+07	4.54258e+07	3.46645e+07	3.67277e+07	5.63342e+07	6.67773e+07	7.44272e+07	3.42156e+07	3.06598e+07	3.47594e+07	17	19	21	20	22	24	23	18
High	O60306	Intron-binding protein aquarius [OS=Homo sapiens]	0	FALSE	179.308	25	21	90	21	1485	171.2	6.37	311.27	21	66.9	64.3	78.2	102.4	81.9	83.4	133.7	161.3	127.8	2.44437e+07	2.34682e+07	2.85606e+07	3.73937e+07	2.98892e+07	3.04605e+07	4.88286e+07	5.88971e+07	4.66744e+07	1.82243e+07	2.12285e+07	2.72675e+07	2.82993e+07	2.0085e+07	2.66976e+07	3.45805e+07	3.77825e+07	4.66744e+07	17	18	19	16	11	17	18	16
High	Q96I24-1	Far upstream element-binding protein 3 [OS=Homo sapiens]	0	FALSE	179.042	48	18	145	16	572	61.6	8.38	430.58	18	97.9	107.1	93.6	82.9	87.2	90.7	120.4	95.8	124.6	9.59329e+07	1.0495e+08	9.1758e+07	8.12439e+07	8.54263e+07	8.88787e+07	1.18015e+08	9.3872e+07	1.22111e+08	7.1524e+07	9.49342e+07	8.76036e+07	6.14848e+07	5.74047e+07	7.78991e+07	8.35783e+07	6.02189e+07	1.22111e+08	17	16	15	17	16	17	14	14
High	P40925	Malate dehydrogenase, cytoplasmic [OS=Homo sapiens]	0	FALSE	178.901	58	15	182	15	334	36.4	7.36	560.9	15	131.2	128.4	110.3	90.6	92.3	79.2	105.2	89.1	73.7	4.65418e+08	4.55351e+08	3.9132e+08	3.21262e+08	3.27372e+08	2.80986e+08	3.73079e+08	3.15951e+08	2.61391e+08	3.46998e+08	4.11895e+08	3.73603e+08	2.43129e+08	2.19987e+08	2.46274e+08	2.64215e+08	2.02683e+08	2.61391e+08	18	19	18	19	18	19	20	19
High	O43615	Mitochondrial import inner membrane translocase subunit TIM44 [OS=Homo sapiens]	0	FALSE	178.508	37	16	104	16	452	51.3	8.32	326	16	109.8	91.9	110.4	71.1	71.6	70	128.6	139.8	106.7	9.75499e+07	8.16339e+07	9.80309e+07	6.31796e+07	6.36309e+07	6.21621e+07	1.14183e+08	1.24142e+08	9.47855e+07	7.27295e+07	7.38432e+07	9.35925e+07	4.78139e+07	4.27586e+07	5.44829e+07	8.08647e+07	7.96374e+07	9.47855e+07	16	14	16	16	15	16	14	14
High	Q99623	Prohibitin-2 [OS=Homo sapiens]	0	FALSE	177.885	61	18	264	18	299	33.3	9.83	835.36	18	123.1	113.7	115.8	67	65.4	63.6	118.3	120.7	112.5	1026354924	9.48611e+08	9.6559e+08	5.58406e+08	5.4516e+08	5.30431e+08	9.86949e+08	1006611816	9.38144e+08	7.65212e+08	8.58081e+08	9.21873e+08	4.22598e+08	3.66336e+08	464904693	6.9896e+08	6.45742e+08	9.38144e+08	14	16	18	16	15	17	15	17
High	Q9UHB6-4	Isoform 4 of LIM domain and actin-binding protein 1 [OS=Homo sapiens]	0	FALSE	177.85	35	21	118	21	760	85.2	6.76	376.08	21	61.1	71.3	64.5	227.2	214.3	176.5	27.1	32.8	25.2	7.67272e+07	8.954e+07	8.09743e+07	2.85368e+08	2.69201e+08	2.2175e+08	3.40477e+07	4.11769e+07	3.1708e+07	5.72049e+07	8.09947e+07	77308151	215964527	1.80898e+08	1.94356e+08	2.41127e+07	2.6415e+07	3.1708e+07	19	20	19	21	21	22	17	17
High	Q92797-1	Symplekin [OS=Homo sapiens]	0	FALSE	177.506	30	21	101	21	1274	141.1	6.13	340.02	21	97.2	118.4	113.2	68.6	69.8	68.3	131.1	120.9	112.5	3.98364e+07	4.85467e+07	4.64082e+07	2.81284e+07	2.86341e+07	2.79843e+07	5.37389e+07	4.95683e+07	4.61213e+07	2.97005e+07	4.39136e+07	4.4307e+07	2.12874e+07	1.92415e+07	2.45272e+07	3.8058e+07	3.17981e+07	4.61213e+07	19	19	20	17	17	18	20	19
High	O00232-1	26s proteasome non-atpase regulatory subunit 12 [OS=Homo sapiens]	0	FALSE	177.438	50	21	109	21	456	52.9	7.65	366.99	21	102.3	108.4	103.7	81.5	95.5	90.4	107.7	99.1	111.4	9.31744e+07	9.86672e+07	9.43926e+07	7.4243e+07	8.69074e+07	8.22826e+07	9.80478e+07	9.0246e+07	101431896	69467392	8.92509e+07	9.01189e+07	5.61866e+07	5.84e+07	7.21179e+07	6.94377e+07	5.78928e+07	101431896	18	18	17	18	16	18	18	16
High	P54652	Heat shock-related 70 kDa protein 2 [OS=Homo sapiens]	0	FALSE	177.271	27	14	335	3	639	70	5.74	1002.26	14	50.9	46	70.1	153.4	39.3	44.5	344	42	109.7	675042	609521	929608	2.03524e+06	521839	590778	4.56251e+06	557645	1.45559e+06	503286	551351	887519	1.54025e+06	350665	517797	3231183	357729	1.45559e+06	1	2	2	1	1	1	2	1
High	Q13619-1	cullin-4A [OS=Homo sapiens]	0	FALSE	177.191	37	20	113	15	759	87.6	8.13	375.86	20	46.8	53.6	52.5	95.8	104.3	109.4	172.9	129.1	135.6	1.98323e+07	2.27483e+07	2.22634e+07	4.06223e+07	4.42537e+07	4.64136e+07	7.33417e+07	5.47501e+07	5.75242e+07	1.47863e+07	2.05773e+07	2.12554e+07	3.07427e+07	2.97376e+07	4.06799e+07	5.19408e+07	3.51222e+07	5.75242e+07	12	14	13	12	14	15	15	13
High	O75431	Metaxin-2 [OS=Homo sapiens]	0	FALSE	176.901	71	12	109	12	263	29.7	6.29	390.85	12	93	81.2	83.6	82.2	90.5	76.9	128.3	156.2	108.1	5.62543e+07	4.91595e+07	5.061e+07	4.97392e+07	5.47526e+07	4.654e+07	7.76281e+07	9.44932e+07	6.54316e+07	4.19411e+07	4.4468e+07	4.83186e+07	3.76423e+07	3.67926e+07	4.07907e+07	5.49764e+07	6.06175e+07	6.54316e+07	14	14	12	14	14	13	14	13
High	O94973	AP-2 complex subunit alpha-2 [OS=Homo sapiens]	0	FALSE	176.896	35	20	113	13	939	103.9	6.96	393.02	20	97.4	89.9	114.5	113.3	98.9	122.9	71	75.5	116.6	1.74485e+07	1.61042e+07	2.05113e+07	2.02914e+07	1.7718e+07	2.20146e+07	1.27166e+07	1.35165e+07	2.08782e+07	1.3009e+07	1.45673e+07	1.95826e+07	1.53564e+07	1.19061e+07	1.92951e+07	9.0059e+06	8.67083e+06	2.08782e+07	11	11	13	11	10	12	8	9
High	P62906	60S ribosomal protein L10A [OS=Homo sapiens]	0	FALSE	176.858	61	16	202	16	217	24.8	9.94	588.51	16	100.4	119.7	109.2	82.5	89.1	90.3	89.8	120.7	98.3	558196122	6.65702e+08	6.06999e+08	4.58714e+08	4.95385e+08	5.02395e+08	4.99574e+08	6.7134e+08	5.46656e+08	4.1617e+08	6.02171e+08	5.79517e+08	3.47152e+08	3.32889e+08	4.40332e+08	3.53799e+08	430664793	5.46656e+08	15	17	16	16	16	17	15	16
High	Q13347	Eukaryotic translation initiation factor 3 subunit I [OS=Homo sapiens]	0	FALSE	176.833	66	13	158	13	325	36.5	5.64	538.66	13	115.1	122.6	118.4	75.3	75.9	76.8	116.4	105.6	93.9	2.1513e+08	229300435	2.2134e+08	1.40814e+08	141912353	1.43582e+08	2.1767e+08	1.97548e+08	1.75588e+08	1.60393e+08	2.07417e+08	2.11319e+08	1.06567e+08	9.53621e+07	1.25845e+08	1.54154e+08	1.26727e+08	1.75588e+08	12	14	14	10	9	11	14	10
High	P23284	peptidyl-prolyl cis-trans isomerase B [OS=Homo sapiens]	0	FALSE	176.239	58	17	257	17	216	23.7	9.41	698.21	17	82.4	88.7	85.9	145.4	134.6	141.4	69.9	70.8	80.9	9.93783e+08	1069542152	1035133124	1752258456	1623144997	1704499355	8.4228e+08	8.5333e+08	9.75513e+08	7.40927e+08	9.67471e+08	9.88267e+08	1326097593	1090719547	1493934191	5.96505e+08	5.47412e+08	9.75513e+08	16	19	19	19	18	19	18	17
High	Q14240-1	eukaryotic initiation factor 4A-II [OS=Homo sapiens]	0	FALSE	176.067	61	20	237	7	407	46.4	5.48	807.67	20	132.9	136.1	119.6	127.5	106	103.2	52.4	58.9	63.3	5.26767e+07	5.39579e+07	4.74282e+07	5.05613e+07	4.20366e+07	4.09007e+07	2.07681e+07	2.33644e+07	2.51116e+07	3.92738e+07	4.88084e+07	4.52808e+07	3.82644e+07	2.82477e+07	3.5848e+07	1.4708e+07	1.49883e+07	2.51116e+07	6	7	7	6	5	6	4	4
High	P35269	General transcription factor iif subunit 1 [OS=Homo sapiens]	0	FALSE	175.966	38	14	63	14	517	58.2	7.49	245.63	14	150.4	136.5	116	64.6	64.6	64.2	115.3	95.6	92.9	6.15448e+07	5.58781e+07	4.74592e+07	2.64244e+07	2.6448e+07	2.62613e+07	4.7197e+07	3.91166e+07	3.80169e+07	4.58855e+07	5.05454e+07	4.53105e+07	1.99978e+07	1.77725e+07	2.30171e+07	3.3425e+07	2.50933e+07	3.80169e+07	15	14	14	10	11	13	14	11
High	O94979	Protein transport protein Sec31A [OS=Homo sapiens]	0	FALSE	175.866	30	22	109	22	1220	132.9	6.89	358.44	22	86	72.6	74.1	138	136.1	123.7	77.4	102.7	89.5	8.92841e+07	7.54112e+07	7.69837e+07	1.43293e+08	1.41312e+08	1.28411e+08	8.03283e+07	1.06676e+08	9.29259e+07	6.65669e+07	6.82143e+07	7.34982e+07	1.08443e+08	9.4959e+07	1.12548e+08	5.68887e+07	6.84328e+07	9.29259e+07	17	13	17	20	21	20	18	19
High	Q15717	ELAV-like protein 1 [OS=Homo sapiens]	0	FALSE	175.737	55	13	142	12	326	36.1	9.17	487.01	13	108.3	108.4	100.6	78.1	82.9	83.4	113.7	110.8	113.8	3.18993e+08	3.19105e+08	2.96289e+08	2.29867e+08	2.44256e+08	2.45515e+08	3.34732e+08	3.26245e+08	3.35196e+08	237829639	2.88651e+08	2.82875e+08	1.73961e+08	1.64135e+08	2.15185e+08	2.37058e+08	2.09286e+08	3.35196e+08	14	15	16	14	12	15	16	13
High	sp P07339	Cathepsin D [OS=Homo sapiens]	0	TRUE	175.579	47	16	90	16	412	44.5	6.54	302.06	16	38.5	39.8	39.1	196.4	194.2	185.8	72.9	67.9	65.5	7.02996e+07	7.26569e+07	7.13945e+07	3.58957e+08	3.54984e+08	3.39628e+08	1.33234e+08	1.24078e+08	1.19697e+08	5.24128e+07	6.57229e+07	6.81621e+07	2.71656e+08	2.38542e+08	2.97672e+08	9.43569e+07	7.9596e+07	1.19697e+08	12	15	16	17	15	17	16	11
High	P62753	40S RIBOSOMAL PROTEIN S6 [OS=Homo sapiens]	0	FALSE	175.423	41	12	169	12	249	28.7	10.84	589.34	12	104.8	110.2	100	86.4	90	99.7	103	98.6	107.3	6.36626e+08	6.6964e+08	6.07167e+08	524968486	5.46746e+08	6.05459e+08	6.25819e+08	5.98659e+08	6.51534e+08	4.74645e+08	6.05733e+08	5.79678e+08	397292673	3.67402e+08	5.30664e+08	4.43207e+08	3.8404e+08	6.51534e+08	16	16	18	18	15	16	16	14
High	P25789	Proteasome subunit alpha type-4 [OS=Homo sapiens]	0	FALSE	175.353	57	12	131	12	261	29.5	7.72	499.12	12	98.4	96.8	103.3	101.4	104	95.8	104.7	102.9	92.7	1.97831e+08	1.94537e+08	2.07558e+08	2.03855e+08	2.08912e+08	1.92475e+08	2.10339e+08	2.06813e+08	1.86358e+08	1.47496e+08	1.75972e+08	1.98161e+08	1.54276e+08	1.40384e+08	1.68698e+08	1.48963e+08	1.32671e+08	1.86358e+08	11	11	13	13	12	13	11	11
High	Q9UEW8	STE20/SPS1-related proline-alanine-rich protein kinase [OS=Homo sapiens]	0	FALSE	175.209	52	17	61	14	545	59.4	6.29	222.2	17	158.4	156.9	154.3	115.3	131.4	124.7	23.1	17.9	17.9	7.12747e+07	7.05699e+07	6.9443e+07	5.18901e+07	5.91045e+07	5.61112e+07	1.0398e+07	8.06845e+06	8.06436e+06	5.31398e+07	6.38351e+07	6.62989e+07	3.92701e+07	3.9717e+07	4.91795e+07	7.36388e+06	5.17592e+06	8.06436e+06	13	14	12	14	12	13	7	8
High	P30044-1	Peroxiredoxin-5, mitochondrial [OS=Homo sapiens]	0	FALSE	175.136	66	14	128	14	214	22.1	8.7	411.79	14	126.7	115.3	113.7	116.7	124	106	72.5	59.6	65.5	3.69174e+08	3.36005e+08	3.31223e+08	3.39975e+08	3.61426e+08	3.08812e+08	2.1115e+08	1.73624e+08	1.90838e+08	2.75242e+08	3.03939e+08	3.16227e+08	2.57291e+08	242870971	270662928	1.49537e+08	1.1138e+08	1.90838e+08	14	14	14	15	14	14	13	15
High	Q9NUU7	ATP-dependent RNA helicase DDX19A [OS=Homo sapiens]	0	FALSE	174.512	55	22	97	3	478	53.9	6.58	309.53	22	76.4	94.1	81.2	58.9	39.5	51.4	214.6	134.9	149	5.35308e+06	6.59184e+06	5.69023e+06	4.12407e+06	2.76548e+06	3.6029e+06	1.50348e+07	9.44697e+06	1.04368e+07	3.99106e+06	5.96275e+06	5.4326e+06	3.12107e+06	1.85835e+06	3.15782e+06	1.06477e+07	6.06024e+06	1.04368e+07	2	3	3	3	3	2	3	3
High	Q13126-1	S-methyl-5'-thioadenosine phosphorylase [OS=Homo sapiens]	0	FALSE	174.481	72	15	115	15	283	31.2	7.18	401.51	15	146.2	180.2	180.7	78.3	67.3	125.5	35.9	28.3	57.7	3.64841e+08	4.49909e+08	4.50999e+08	1.95398e+08	1.68087e+08	3.1322e+08	8.96766e+07	7.05627e+07	1.43976e+08	2.72012e+08	406971904	4.3058e+08	1.47876e+08	1.12951e+08	2.74527e+08	6.35092e+07	4.5266e+07	1.43976e+08	15	16	16	14	15	15	14	14
High	Q8IZ83	Aldehyde dehydrogenase family 16 member A1 [OS=Homo sapiens]	0	FALSE	174.415	37	16	108	16	802	85.1	6.79	367.39	16	53.2	49.4	49.7	150.3	176.2	136.4	90.2	100.1	94.4	2.87342e+07	2.67008e+07	2.68379e+07	8.11642e+07	9.51741e+07	7.36737e+07	4.8686e+07	5.40821e+07	5.09833e+07	2.14231e+07	2.41526e+07	2.56228e+07	6.14245e+07	6.3955e+07	6.45724e+07	3.44796e+07	3.46937e+07	5.09833e+07	12	12	13	13	14	17	14	13
High	O00411	DNA-directed RNA polymerase, mitochondrial [OS=Homo sapiens]	0	FALSE	174.384	29	22	98	22	1230	138.5	8.98	323.57	22	98.2	99.2	102.6	61.4	87.8	45.9	133	154.4	117.5	3.96508e+07	4.00501e+07	4.14342e+07	2.47943e+07	3.54289e+07	1.85474e+07	5.36878e+07	6.23243e+07	4.74548e+07	2.95621e+07	3.6228e+07	3.95583e+07	1.87642e+07	2.38075e+07	1.62562e+07	3.80219e+07	3.99811e+07	4.74548e+07	22	24	23	10	13	16	21	22
High	O00764-1	Pyridoxal kinase [OS=Homo sapiens]	0	FALSE	173.898	62	11	102	11	312	35.1	6.13	370.83	11	89.9	51.7	59.7	156.4	132.4	133.9	65.9	103.9	106.1	2.46949e+07	1.42005e+07	1.64032e+07	4.29463e+07	3.63406e+07	3.67497e+07	1.80864e+07	2.85309e+07	2.91367e+07	1.84116e+07	1.28453e+07	1.56606e+07	3.25014e+07	2.44201e+07	3.22099e+07	1.28088e+07	1.83026e+07	2.91367e+07	10	8	10	11	11	12	10	10
High	O95433	activator of 90 kDa heat shock protein ATPase homolog 1 [OS=Homo sapiens]	0	FALSE	173.892	63	19	112	19	338	38.3	5.53	398.66	19	121.2	127.3	134.2	50.5	51.3	54	126.6	119.4	115.3	2.54306e+08	2.67186e+08	2.81534e+08	1.06037e+08	1.07734e+08	113386647	2.65737e+08	2.50558e+08	2.41924e+08	1.89601e+08	2.41687e+08	2.68788e+08	8.02483e+07	7.23947e+07	9.93794e+07	1.88196e+08	1.60733e+08	2.41924e+08	17	16	17	15	14	17	14	15
High	Q9NVA2-1	Septin-11 [OS=Homo sapiens]	0	FALSE	173.859	55	17	138	11	429	49.4	6.81	449.41	17	110.7	128.1	114.1	122.2	125.6	111.3	65.1	68.1	54.9	7.57436e+07	8.76429e+07	7.80739e+07	8.35613e+07	85939641	7.61012e+07	4.45003e+07	4.65496e+07	3.75194e+07	5.64716e+07	7.92787e+07	7.45391e+07	6.32386e+07	5.77496e+07	6.67e+07	3.15152e+07	2.98616e+07	3.75194e+07	11	10	11	11	11	11	11	12
High	Q9Y696	Chloride intracellular channel protein 4 [OS=Homo sapiens]	0	FALSE	173.582	62	10	101	10	253	28.8	5.59	408.13	10	101.5	85.8	138	132.3	120.1	132.9	48.6	59.2	81.7	7.87952e+07	6.66594e+07	1.07135e+08	1.02725e+08	9.32377e+07	1.03216e+08	3.77311e+07	4.59516e+07	6.34668e+07	5.87468e+07	6.02978e+07	1.02285e+08	7.77413e+07	6.26538e+07	9.04654e+07	2.67213e+07	2.9478e+07	6.34668e+07	12	11	11	10	9	11	11	11
High	Q6NXG1-1	epithelial splicing regulatory protein 1 [OS=Homo sapiens]	0	FALSE	173.392	43	17	119	15	681	75.5	6.68	416.74	17	113.7	107.8	105.2	126.5	128.2	120.8	67.8	64.1	65.7	5.47458e+07	5.18959e+07	5.06503e+07	6.09284e+07	6.17445e+07	5.81699e+07	3.26579e+07	3.08775e+07	3.16531e+07	4.08164e+07	4.69432e+07	4.83571e+07	4.61102e+07	4.1491e+07	5.09839e+07	2.31284e+07	1.9808e+07	3.16531e+07	16	16	17	17	17	17	17	16
High	Q06124	tyrosine-protein phosphatase non-receptor type 11 [OS=Homo sapiens]	0	FALSE	173.172	39	18	103	18	597	68.4	7.3	378.78	18	107.3	140.6	113.7	80.7	78.3	86.4	112.7	84.8	95.4	7.07745e+07	9.27182e+07	7.4986e+07	5.32366e+07	5.16653e+07	5.69886e+07	7.43424e+07	5.59354e+07	6.29364e+07	5.27668e+07	8.38697e+07	7.1591e+07	4.02891e+07	3.4718e+07	4.99485e+07	5.26495e+07	3.58826e+07	6.29364e+07	18	19	16	17	18	16	18	16
High	P53675	Clathrin heavy chain 2 [OS=Homo sapiens]	0	FALSE	173.131	12	20	193	1	1640	186.9	5.85	650.95	20
High	P16104	Histone H2AX [OS=Homo sapiens]	0	FALSE	172.962	55	7	218	2	143	15.1	10.74	869.41	7	340.7	82.6	78.2	64.6	57.2	45.2	74.4	92.1	65.1	7.82531e+07	1.89648e+07	1.79598e+07	1.48308e+07	1.31436e+07	1.0382e+07	1.70971e+07	2.11572e+07	1.49513e+07	5.83426e+07	1.71549e+07	1.71467e+07	1.12238e+07	8.83225e+06	9.09944e+06	1.21082e+07	1.35724e+07	1.49513e+07	3	3	3	2	3	2	3	2
High	P53582	Methionine aminopeptidase 1 [OS=Homo sapiens]	0	FALSE	172.817	63	15	90	15	386	43.2	7.17	322.06	15	125.6	143.5	141.4	118.9	108.7	128.2	39.7	44.5	49.5	8.50335e+07	9.71873e+07	9.57739e+07	8.04806e+07	7.35809e+07	8.68379e+07	2.68815e+07	3.01179e+07	3.35142e+07	6.33978e+07	8.79122e+07	9.14377e+07	6.09072e+07	4.94449e+07	7.61104e+07	1.90376e+07	1.93206e+07	3.35142e+07	14	15	15	16	14	14	14	10
High	P55084	Trifunctional enzyme subunit beta, mitochondrial [OS=Homo sapiens]	0	FALSE	172.808	55	19	110	19	474	51.3	9.41	370.08	19	90.5	93.7	94.4	102.8	104	99	102.1	102.7	110.7	1.47712e+08	1.52943e+08	1.54088e+08	1.67862e+08	1.69674e+08	161662800	1.66656e+08	1.67639e+08	1.80748e+08	1.10129e+08	1.38347e+08	1.47112e+08	1.27037e+08	114017501	1.41692e+08	1.18026e+08	1.0754e+08	1.80748e+08	17	17	18	17	14	18	16	11
High	P48147	prolyl endopeptidase [OS=Homo sapiens]	0	FALSE	172.795	44	23	110	23	710	80.6	5.86	346.69	23	132.2	142	137.6	76.5	78.9	74.9	101	78.7	78.3	1.16334e+08	1.24967e+08	121132765	6.73809e+07	6.94215e+07	6.59515e+07	8.88897e+07	6.92603e+07	6.89451e+07	8.67344e+07	1.1304e+08	1.15648e+08	5.09934e+07	4.66498e+07	5.78042e+07	6.29519e+07	4.44306e+07	6.89451e+07	18	20	19	15	14	17	17	14
High	P27816-1	Microtubule-associated protein 4 [OS=Homo sapiens]	0	FALSE	172.68	31	22	84	22	1152	120.9	5.43	269.9	22	123.8	134.4	120.2	64.6	96.4	70.7	142.1	88	59.7	1.04535e+08	1.13504e+08	1.01573e+08	5.45756e+07	8.14697e+07	5.97409e+07	120049076	7.4362e+07	5.04092e+07	7.79373e+07	1.02672e+08	9.69739e+07	4.13024e+07	5.47459e+07	5.23609e+07	8.5019e+07	4.77033e+07	5.04092e+07	17	20	20	12	12	12	14	13
High	Q15056-1	Eukaryotic translation initiation factor 4H [OS=Homo sapiens]	0	FALSE	172.667	45	8	127	8	248	27.4	7.23	456.94	8	94.6	95.5	110.7	103.4	81.5	96	108.7	104.8	105	8.00462e+07	8.08089e+07	9.36852e+07	8.75177e+07	6.89435e+07	8.12276e+07	9.19868e+07	8.86971e+07	8.88751e+07	5.96795e+07	7.30969e+07	8.94436e+07	6.62328e+07	4.63286e+07	7.11931e+07	6.51453e+07	5.68992e+07	8.88751e+07	12	13	12	12	10	12	12	11
High	P27216-1	Annexin A13 [OS=Homo sapiens]	0	FALSE	172.31	70	21	69	20	316	35.4	5.6	226.52	21	0.2	0.5	0.3	326.5	311.8	260.2	0.3		0.1	251123	670845	454566	4.30692e+08	4.11264e+08	3.43222e+08	454033		96698.4	187228	606823	433985	3.25945e+08	2.76361e+08	3.00822e+08	321547		96698.4	1	2	1	18	19	19	1
High	Q9Y6M1	Insulin-like growth factor 2 mRNA-binding protein 2 [OS=Homo sapiens]	0	FALSE	172.069	45	20	127	17	599	66.1	8.46	361.94	20	206	180.1	187	56.1	63.1	59.1	56.1	46.5	45.9	1.29809e+08	1.1348e+08	1.17812e+08	3.53708e+07	3.97746e+07	3.72646e+07	3.53332e+07	2.92836e+07	2.89478e+07	9.67807e+07	1.0265e+08	1.12478e+08	2.67684e+07	2.67277e+07	3.26612e+07	2.50231e+07	1.87855e+07	2.89478e+07	16	18	18	15	13	16	15	11
High	Q12907	Vesicular integral-membrane protein VIP36 [OS=Homo sapiens]	0	FALSE	171.748	60	17	112	17	356	40.2	6.95	379.7	17	75.6	77.7	82.7	111.8	108.7	101.8	112.1	122.3	107.4	9.95504e+07	1.0239e+08	1.08906e+08	147294351	1.43268e+08	1.34067e+08	1.47761e+08	1.61107e+08	1.41495e+08	7.42211e+07	9.26183e+07	1.03975e+08	1.11471e+08	9.62731e+07	1.17505e+08	1.04645e+08	1.0335e+08	1.41495e+08	15	16	16	18	16	16	16	14
High	P51858	hepatoma-derived growth factor [OS=Homo sapiens]	0	FALSE	171.642	72	17	150	16	240	26.8	4.73	514.21	17	69.5	90.9	75	119.7	112.7	128.9	119.1	88.7	95.5	9.58606e+07	125436493	1.03542e+08	1.65123e+08	1.55565e+08	1.77792e+08	1.64373e+08	1.22425e+08	1.31705e+08	7.14701e+07	1.13465e+08	9.88537e+07	1.24964e+08	104536515	1.55829e+08	1.16409e+08	7.85356e+07	1.31705e+08	13	15	17	16	15	16	17	16
High	O14715	RANBP2-like and GRIP domain-containing protein 8 [OS=Homo sapiens]	0	FALSE	171.484	16	20	111	1	1765	198.9	6.49	309.74	20			157.7						742.3			172386						811737			164581						811737			1
High	Q9NZB2-1	Constitutive coactivator of PPAR-gamma-like protein 1 [OS=Homo sapiens]	0	FALSE	171.225	32	21	109	21	1118	121.8	8.88	360.21	21	100.1	108	94.4	109.1	116	125.7	78.5	83.2	85	4.31931e+07	4.66145e+07	4.07464e+07	4.70809e+07	5.00325e+07	5.42233e+07	3.38618e+07	3.59076e+07	3.66654e+07	3.22032e+07	4.21659e+07	3.89016e+07	3.56305e+07	3.36208e+07	4.75248e+07	2.3981e+07	2.30347e+07	3.66654e+07	15	17	16	15	14	17	11	12
High	Q92597	Protein NDRG1 [OS=Homo sapiens]	0	FALSE	171.016	62	12	44	12	394	42.8	5.82	186.48	12	161.7	266.3	390.8	29.2	7.8	13.2	15.5	7	8.6	3.39421e+07	5.591e+07	8.2053e+07	6.1307e+06	1.6315e+06	2.77213e+06	3.25537e+06	1.45982e+06	1.80699e+06	2.5306e+07	5.05742e+07	7.8338e+07	4.63967e+06	1.09634e+06	2.42968e+06	2.30546e+06	936477	1.80699e+06	10	12	12	5	1	3	2	3
High	P18858	DNA ligase 1 [OS=Homo sapiens]	0	FALSE	171.014	36	19	86	19	919	101.7	5.62	279.78	19	34.4	58.8	62.6	142.5	88.5	94	155.6	136.4	127.1	1.30542e+07	2.23556e+07	2.37966e+07	5.41259e+07	3.36295e+07	3.57244e+07	5.91088e+07	5.18334e+07	4.8273e+07	9.73275e+06	2.02221e+07	2.27192e+07	4.09621e+07	2.25983e+07	3.13112e+07	4.1861e+07	3.32512e+07	4.8273e+07	12	15	17	17	16	17	17	15
High	Q9BVI4	Nucleolar complex protein 4 homolog [OS=Homo sapiens]	0	FALSE	170.721	48	12	119	12	516	58.4	7.49	356.02	12	87.5	112.9	98.7	76.5	85.7	83.3	110.3	148.4	96.8	2.4419e+07	3.14928e+07	2.7524e+07	2.1329e+07	2.38958e+07	2.32433e+07	3.07604e+07	4.14116e+07	2.69913e+07	1.82059e+07	2.84872e+07	2.62778e+07	1.61417e+07	1.60575e+07	2.0372e+07	2.17846e+07	26565566	2.69913e+07	12	15	13	12	12	12	12	11
High	P51784	Ubiquitin carboxyl-terminal hydrolase 11 [OS=Homo sapiens]	0	FALSE	170.63	33	17	66	16	963	109.7	5.45	258.01	17	106.6	205.7	172.4	13.4	13.6	4.7	151.9	108.9	122.8	1.36057e+07	2.62564e+07	2.20013e+07	1.70731e+06	1.73114e+06	598653	1.93874e+07	1.39013e+07	1.56783e+07	1.01439e+07	2.37506e+07	2.10052e+07	1.29208e+06	1.16329e+06	524698	1.37302e+07	8.91768e+06	1.56783e+07	10	14	13	5	4	2	12	12
High	P12763	SWISS-PROT:P12763 (Bos taurus) Alpha-2-HS-glycoprotein precursor	0	TRUE	170.624	43	11	340	11	359	38.4	5.5	1228.76	11	52.5	76.6	114.6	88.7	189.9	63.2	56.3	96.3	162	9.86192e+07	1.43922e+08	2.15221e+08	1.6663e+08	3.56755e+08	1.18671e+08	1.05857e+08	1.8087e+08	3.0435e+08	7.35268e+07	1.30187e+08	2.05477e+08	1.26105e+08	2.39732e+08	1.04011e+08	7.49684e+07	1.16028e+08	3.0435e+08	12	11	13	12	13	11	10	12
High	Q9NUJ1	Mycophenolic acid acyl-glucuronide esterase, mitochondrial [OS=Homo sapiens]	0	FALSE	170.54	72	18	117	18	306	33.9	8.57	378.63	18	241.7	250.2	236.5	34.8	32.8	29.8	25.4	23.2	25.4	2.71587e+08	2.81175e+08	2.65773e+08	3.91291e+07	3.68178e+07	3.3519e+07	2.85893e+07	2.61214e+07	2.85355e+07	2.02485e+08	2.54341e+08	2.5374e+08	2.96126e+07	2.47408e+07	2.93782e+07	2.0247e+07	1.67569e+07	2.85355e+07	18	19	19	15	14	14	14	14
High	P55809	Succinyl-CoA:3-ketoacid coenzyme A transferase 1, mitochondrial [OS=Homo sapiens]	0	FALSE	170.537	45	15	104	15	520	56.1	7.46	300.39	15	96	109.5	130.9	2.6	2.6	2.1	169.1	164.7	222.6	4.31745e+07	4.92765e+07	5.88709e+07	1.15998e+06	1.14845e+06	955555	7.60527e+07	7.40963e+07	1.00141e+08	3.21893e+07	4.45738e+07	5.62055e+07	877866	771735	837511	5.38607e+07	4.75329e+07	1.00141e+08	14	12	15	3	3	3	13	12
High	P30837	Aldehyde dehydrogenase X, mitochondrial [OS=Homo sapiens]	0	FALSE	170.537	56	19	110	17	517	57.2	6.8	408.37	19	136.3	148.5	151.2	49.4	43.9	50.1	116.5	86	118.1	7.36367e+07	8.0224e+07	8.17195e+07	2.66825e+07	2.37303e+07	2.70635e+07	6.29582e+07	4.64965e+07	6.38016e+07	5.49008e+07	7.25679e+07	7.80196e+07	2.01931e+07	15946280	2.37202e+07	4.45871e+07	29827563	6.38016e+07	15	16	16	16	12	13	15	14
High	P62917	60S ribosomal protein L8 [OS=Homo sapiens]	0	FALSE	170.511	49	10	122	10	257	28	11.03	473.24	10	114.2	123.7	110.1	88.2	90.5	98	82.8	96.7	95.9	4.62223e+08	5.0076e+08	4.4545e+08	3.57054e+08	3.66237e+08	3.96507e+08	3.35063e+08	3.91324e+08	3.88231e+08	3.44616e+08	4.5297e+08	425281865	2.70216e+08	2.46103e+08	3.47525e+08	2.37292e+08	2.51035e+08	3.88231e+08	9	10	10	8	9	9	8	9
High	Q9Y4E8	ubiquitin carboxyl-terminal hydrolase 15 [OS=Homo sapiens]	0	FALSE	170.314	30	19	93	17	981	112.3	5.22	334.87	19	96.2	110.9	132.3	81.9	76.1	78.5	106	103.9	114.2	3.10497e+07	3.57823e+07	4.27053e+07	2.64313e+07	24540796	2.53374e+07	3.4199e+07	3.3531e+07	3.68362e+07	2.31495e+07	3.23674e+07	4.07718e+07	2.0003e+07	1.64909e+07	2.22073e+07	2.42198e+07	2.15102e+07	3.68362e+07	13	14	15	17	12	13	14	14
High	Q86U38	Nucleolar protein 9 [OS=Homo sapiens]	0	FALSE	170.311	42	13	75	13	636	69.4	7.28	300.61	13	67.1	74.3	82.6	69.5	76.7	66.8	165	202.1	95.8	1.64524e+07	1.82188e+07	2.02566e+07	1.70434e+07	1.88079e+07	1.6382e+07	4.0438e+07	4.9538e+07	2.34869e+07	1.22663e+07	1.64801e+07	1.93395e+07	1.28984e+07	1.26385e+07	1.43583e+07	2.86383e+07	3.17787e+07	2.34869e+07	12	12	12	12	14	13	13	12
High	P26583	High mobility group protein B2 [OS=Homo sapiens]	0	FALSE	170.244	40	14	203	11	209	24	7.81	667.94	14	107.4	157.9	124.4	82	79.4	85.8	97.9	78.3	86.9	4.23302e+08	6.2242e+08	4.90377e+08	323340443	3.13131e+08	3.3811e+08	3.8576e+08	3.08842e+08	3.42394e+08	3.15598e+08	563019876	4.68175e+08	2.44702e+08	210417361	2.96341e+08	2.73196e+08	1.98122e+08	3.42394e+08	10	11	12	11	12	11	11	10
High	Q13217	DnaJ homolog subfamily C member 3 [OS=Homo sapiens]	0	FALSE	170.188	52	18	68	18	504	57.5	6.15	245.91	18	65.1	54.4	70.2	138.6	133.5	134.5	98.5	103.6	101.7	3.56314e+07	2.97725e+07	3.84621e+07	7.59208e+07	7.30958e+07	7.36425e+07	5.39321e+07	5.67421e+07	5.56869e+07	2.65654e+07	2.69312e+07	3.67207e+07	5.74564e+07	4.91189e+07	6.45451e+07	3.81948e+07	3.64001e+07	5.56869e+07	15	14	15	17	16	17	13	14
High	P11498	pyruvate carboxylase, mitochondrial [OS=Homo sapiens]	0	FALSE	169.934	26	16	65	16	1178	129.6	6.84	245.19	16	57.5	47.1	48	160.7	159.4	158.2	94.6	87.1	87.4	1.74643e+07	1.42965e+07	1.45582e+07	4.87549e+07	4.83825e+07	4.80175e+07	2.87096e+07	2.64378e+07	2.65089e+07	1.30207e+07	1.29322e+07	1.3899e+07	3.68974e+07	3.25121e+07	4.20857e+07	2.03322e+07	1.69599e+07	2.65089e+07	12	13	13	13	13	16	15	10
High	P62191	26S proteasome regulatory subunit 4 [OS=Homo sapiens]	0	FALSE	169.589	57	19	118	18	440	49.2	6.21	409.99	19	126	133.9	127.1	71	76.5	83.9	94.5	91.1	95.9	2.62095e+08	2.78571e+08	2.64401e+08	1.47639e+08	1.59204e+08	1.74581e+08	1.96464e+08	1.89533e+08	1.99373e+08	1.95408e+08	2.51985e+08	2.5243e+08	1.11732e+08	106981932	1.53014e+08	1.39137e+08	1.21585e+08	1.99373e+08	17	17	18	15	15	16	15	14
High	P19623	spermidine synthase [OS=Homo sapiens]	0	FALSE	169.505	62	14	113	14	302	33.8	5.49	409.13	14	86.2	88	91.7	76.3	77.5	88	125.4	126.3	140.5	1.0504e+08	1.07197e+08	1.11688e+08	9.29172e+07	9.44322e+07	1.07177e+08	1.52664e+08	153810075	1.71156e+08	7.83141e+07	9.69668e+07	1.06631e+08	7.03192e+07	6.34565e+07	9.39367e+07	1.08117e+08	9.86693e+07	1.71156e+08	12	14	14	13	12	16	13	11
High	P42765	3-ketoacyl-CoA thiolase, mitochondrial [OS=Homo sapiens]	0	FALSE	169.358	68	18	70	18	397	41.9	8.09	218.53	18	11.8	9.2	6.1	194.9	212.1	182.8	87.7	86.1	109.2	8.48772e+06	6.61269e+06	4.41443e+06	1.40048e+08	1.52402e+08	1.3136e+08	6.30072e+07	6.18342e+07	7.84523e+07	6.32813e+06	5.98161e+06	4.21457e+06	1.05987e+08	102410876	1.15132e+08	4.46218e+07	3.96667e+07	7.84523e+07	7	7	6	17	14	17	14	12
High	Q63HN8-4	Isoform 2 of E3 ubiquitin-protein ligase RNF213 [OS=Homo sapiens]	0	FALSE	169.271	9	25	79	25	5256	596.1	6.43	242.42	25	92.6	91.8	86.3	114.7	118.1	118.6	100.8	94.3	82.8	1.9222e+07	1.90486e+07	1.79083e+07	2.37932e+07	2.45e+07	2.46018e+07	2.09242e+07	1.9572e+07	1.71749e+07	1.43312e+07	1.72307e+07	1.70975e+07	1.80066e+07	1.64635e+07	2.15627e+07	1.48186e+07	1.25555e+07	1.71749e+07	22	24	23	22	21	24	22	20
High	Q15067	Peroxisomal acyl-coenzyme A oxidase 1 [OS=Homo sapiens]	0	FALSE	168.967	53	17	72	1	660	74.4	8.16	266.28	17	141.4	187.8	170.1		154.9		22.3	223.6		331109	439627	398136		362603		52182.8	523373		246862	397672	380110		243662		36956	335744		1	1	1		1		1	1
High	O43809	Cleavage and polyadenylation specificity factor subunit 5 [OS=Homo sapiens]	0	FALSE	168.912	78	14	143	14	227	26.2	8.82	537.16	14	83.6	81.3	82.1	108.4	100.1	90.5	115.3	129.9	108.8	1.59942e+08	1.55509e+08	1.57036e+08	2.07435e+08	191545328	1.73179e+08	2.20556e+08	2.4855e+08	2.08066e+08	119247121	1.40668e+08	1.49926e+08	1.56985e+08	128714461	1.51785e+08	1.56198e+08	1.59445e+08	2.08066e+08	12	11	10	14	14	14	12	15
High	O96019-1	Actin-like protein 6A [OS=Homo sapiens]	0	FALSE	168.841	51	13	94	13	429	47.4	5.6	386.83	13	53.2	75.2	89.4	93.7	85.4	114.6	106.2	103.5	178.9	2.4187e+07	3.41912e+07	4.06306e+07	4.26022e+07	3.88095e+07	5.20893e+07	4.82929e+07	4.70415e+07	8.13572e+07	1.80329e+07	3.09282e+07	3.8791e+07	3.22411e+07	2.60792e+07	45654432	3.42012e+07	3.01772e+07	8.13572e+07	12	12	13	12	10	13	12	9
High	Q8NBF2-1	NHL repeat-containing protein 2 [OS=Homo sapiens]	0	FALSE	168.741	42	14	70	14	726	79.4	5.55	242.26	14	105.5	63.4	114.3	100.2	114.8	95.5	95.5	120.1	90.6	7.82003e+07	4.6975e+07	8.47387e+07	7.43061e+07	8.50999e+07	7.08198e+07	7.07957e+07	8.90286e+07	6.71432e+07	5.83033e+07	4.2492e+07	8.09021e+07	5.62344e+07	5.71853e+07	6.20711e+07	5.01377e+07	5.71119e+07	6.71432e+07	17	14	16	14	13	15	15	10
High	Q86UP2-1	Kinectin [OS=Homo sapiens]	0	FALSE	168.486	23	22	90	22	1357	156.2	5.64	298.73	22	127.4	121.8	115.7	85.4	87.2	90.7	92.4	88.3	91.1	6.51242e+07	6.22741e+07	5.91195e+07	4.36258e+07	4.45655e+07	4.63485e+07	4.72409e+07	4.51058e+07	4.6585e+07	4.85542e+07	5.63309e+07	5.64428e+07	3.30157e+07	2.99471e+07	4.06228e+07	3.34561e+07	2.89354e+07	4.6585e+07	19	20	20	17	16	17	16	17
High	Q9UIG0	Tyrosine-protein kinase BAZ1B [OS=Homo sapiens]	0	FALSE	168.425	22	22	88	22	1483	170.8	8.48	286.91	22	75.1	88.6	80.9	89.6	91	89.5	157.6	129.2	98.4	3.22835e+07	3.80683e+07	3.47423e+07	3.8499e+07	3.91088e+07	3.84447e+07	6.77257e+07	5.55279e+07	4.22762e+07	2.40694e+07	3.44353e+07	3.31694e+07	2.91358e+07	2.62803e+07	3.36954e+07	4.79635e+07	3.56212e+07	4.22762e+07	17	18	18	17	17	19	17	17
High	P07686	Beta-hexosaminidase subunit beta [OS=Homo sapiens]	0	FALSE	167.925	32	13	101	12	556	63.1	6.76	379.12	13	102.5	107.6	94.8	131.1	129.1	118.2	85	70.1	61.4	7.90852e+07	8.30176e+07	7.31534e+07	1.01116e+08	99572392	9.12006e+07	6.55949e+07	5.40988e+07	4.73236e+07	5.8963e+07	7.50948e+07	6.98413e+07	7.65237e+07	6.69106e+07	7.99342e+07	4.64545e+07	3.47044e+07	4.73236e+07	13	13	14	13	11	13	12	12
High	O75534	cold shock domain-containing protein E1 [OS=Homo sapiens]	0	FALSE	167.453	32	23	116	23	798	88.8	6.25	368.1	23	80.3	87	86	80.8	91.3	84.3	134.4	145	111	1.13797e+08	1.23289e+08	1.21873e+08	1.1449e+08	1.29468e+08	1.1953e+08	1.9049e+08	2.05486e+08	1.57384e+08	8.48425e+07	1.11523e+08	1.16355e+08	8.66455e+07	8.69995e+07	1.04764e+08	1.34905e+08	1.31819e+08	1.57384e+08	22	22	23	23	23	22	23	23
High	Q14203-4	Isoform 4 of Dynactin subunit 1 [OS=Homo sapiens]	0	FALSE	167.327	33	24	80	24	1253	138.7	5.54	261.28	24	108.6	116.5	100	94.6	100.2	97.4	105.8	83.2	93.5	5.44912e+07	5.8446e+07	5.01655e+07	4.74512e+07	5.02787e+07	4.88791e+07	5.30871e+07	4.17481e+07	4.68888e+07	4.06266e+07	5.28682e+07	4.78942e+07	3.59107e+07	3.37862e+07	4.28408e+07	3.75964e+07	2.67814e+07	4.68888e+07	21	21	22	19	21	20	20	21
High	P49023	Paxillin [OS=Homo sapiens]	0	FALSE	167.243	45	15	67	15	591	64.5	6.19	230.32	15	123.2	149.5	158.3	106	106.1	90.2	37.5	54.4	74.7	4.12067e+07	4.99777e+07	5.29447e+07	3.54555e+07	3.54611e+07	3.01528e+07	1.25494e+07	1.81929e+07	2.49832e+07	3.07222e+07	4.52081e+07	5.05476e+07	2.68325e+07	23829117	2.64279e+07	8.88753e+06	1.16707e+07	2.49832e+07	13	14	14	12	11	14	9	10
High	Q96KG9	N-terminal kinase-like protein [OS=Homo sapiens]	0	FALSE	166.803	22	11	63	11	808	89.6	6.3	248.15	11	104.8	91.6	108.5	125.3	124.2	109.8	68.5	90.7	76.7	2.84332e+07	2.4868e+07	2.94365e+07	3.4006e+07	3.37138e+07	2.98138e+07	1.85779e+07	2.46037e+07	2.08127e+07	2.11988e+07	2.24947e+07	2.81038e+07	2.57355e+07	2.2655e+07	2.61308e+07	1.31569e+07	1.57833e+07	2.08127e+07	11	9	12	11	12	11	9	11
High	Q9UL46	proteasome activator complex subunit 2 [OS=Homo sapiens]	0	FALSE	166.711	73	14	187	14	239	27.4	5.73	701.48	14	94.2	107.8	87.4	104.4	102.6	85.2	110.3	117	91.1	2.67837e+08	3.06655e+08	2.48472e+08	296761356	2.91775e+08	2.42375e+08	3.1365e+08	3.32598e+08	2.59165e+08	1.99689e+08	2.77389e+08	2.37222e+08	2.24587e+08	1.96067e+08	212433370	222127358	2.13362e+08	2.59165e+08	14	14	14	14	14	14	14	14
High	Q9Y6Y8	SEC23-interacting protein [OS=Homo sapiens]	0	FALSE	166.673	30	17	77	17	1000	111	5.54	282.62	17	106.3	141.7	130.4	91	80.8	79	99.2	91.4	80.1	3.71156e+07	4.94732e+07	4.55147e+07	3.17584e+07	2.82157e+07	2.75877e+07	3.46236e+07	3.19186e+07	2.79703e+07	2.7672e+07	4.47518e+07	4.3454e+07	2.40345e+07	1.89604e+07	2.41797e+07	2.45205e+07	2.04758e+07	2.79703e+07	13	14	14	11	12	12	14	13
High	Q9NYL9	tropomodulin-3 [OS=Homo sapiens]	0	FALSE	166.562	64	13	101	13	352	39.6	5.19	365.69	13	80.1	74.9	75.6	150.8	156.3	141.3	79.6	69	72.4	4.24472e+07	3.96681e+07	4.006e+07	7.99285e+07	8.27971e+07	7.48854e+07	4.21557e+07	3.65569e+07	3.83702e+07	3.1647e+07	3.58823e+07	3.82463e+07	6.04893e+07	5.56379e+07	6.56344e+07	2.98548e+07	2.34513e+07	3.83702e+07	12	11	12	12	12	12	11	11
High	O00487	26S proteasome non-ATPase regulatory subunit 14 [OS=Homo sapiens]	0	FALSE	166.498	70	11	85	11	310	34.6	6.52	342.2	11	102.8	127.8	138.4	68.4	65.5	71.9	93.8	88.7	142.8	7.17662e+07	8.92207e+07	9.66259e+07	4.77649e+07	4.57765e+07	5.02339e+07	6.55414e+07	6.19259e+07	9.97023e+07	5.35062e+07	8.07059e+07	9.22511e+07	3.61481e+07	3.07608e+07	4.40283e+07	4.64166e+07	3.97255e+07	9.97023e+07	9	10	11	10	9	10	10	7
High	Q9HCE1	Putative helicase MOV-10 [OS=Homo sapiens]	0	FALSE	166.399	37	21	81	21	1003	113.6	8.82	267.31	21	155.4	139.5	139.5	76.9	82.4	89.7	61.1	73	82.5	6.17583e+07	5.54731e+07	5.5457e+07	3.05576e+07	3.27613e+07	3.56585e+07	2.42793e+07	2.90396e+07	3.28018e+07	4.60447e+07	5.01791e+07	5.29462e+07	2.31258e+07	2.20149e+07	3.12534e+07	1.71947e+07	1.86289e+07	3.28018e+07	18	18	18	15	14	21	12	13
High	P12235	ADP/ATP translocase 1 [OS=Homo sapiens]	0	FALSE	166.28	49	16	495	5	298	33	9.76	1471	16	112.5	81.1	89.3	62.8	61.9	43.9	130.5	176.5	141.5	5.13648e+07	3.7048e+07	4.07761e+07	2.86594e+07	2.82731e+07	2.00492e+07	5.95967e+07	8.05865e+07	6.46379e+07	3.82956e+07	3.35123e+07	3.89299e+07	2.16892e+07	1.89989e+07	1.75724e+07	4.22065e+07	5.16963e+07	6.46379e+07	5	5	5	5	5	5	5	5
High	Q7L2H7	Eukaryotic translation initiation factor 3 subunit M [OS=Homo sapiens]	0	FALSE	166.148	61	15	149	15	374	42.5	5.63	487.83	15	118.1	120.9	117.5	66.7	67.5	71.4	114.3	111.3	112.3	1.0805e+08	1.10641e+08	1.07539e+08	6.10101e+07	6.18011e+07	6.53351e+07	1.04546e+08	1.01872e+08	1.02734e+08	8.05584e+07	100082182	102669879	4.61721e+07	4.1529e+07	5.7264e+07	7.40398e+07	6.53508e+07	1.02734e+08	16	16	16	12	12	15	15	13
High	P49257	Protein ERGIC-53 [OS=Homo sapiens]	0	FALSE	166.084	32	7	68	7	510	57.5	6.77	272.88	7	99.5	114.1	98.3	125.6	121.2	128.8	84.1	57.2	71.3	4.03576e+07	4.62985e+07	3.98735e+07	5.09731e+07	4.91575e+07	5.22473e+07	3.41225e+07	2.32187e+07	2.89085e+07	3.00891e+07	4.188e+07	3.80683e+07	3.85761e+07	3.30328e+07	4.57929e+07	24165645	1.48948e+07	2.89085e+07	9	9	9	10	8	7	9	6
High	Q9BTT6	Leucine-rich repeat-containing protein 1 [OS=Homo sapiens]	0	FALSE	165.843	42	11	88	10	524	59.2	5.02	327.11	11	119.9	115.2	125.9	124.3	108.4	124.5	50	62.4	69.4	1.50011e+07	1.44165e+07	1.57553e+07	1.55484e+07	1.35567e+07	1.55819e+07	6.25708e+06	7.80873e+06	8.67862e+06	1.11842e+07	13040650	1.5042e+07	1.17669e+07	9.10984e+06	1.3657e+07	4.43128e+06	5.0093e+06	8.67862e+06	11	12	12	11	11	9	11	9
High	Q9UQ35	serine/arginine repetitive matrix protein 2 [OS=Homo sapiens]	0	FALSE	165.675	12	21	86	21	2752	299.4	12.06	281.82	21	143.3	148.1	149.1	45.3	44.2	63	109.3	92.5	105.4	1.14426e+08	1.18329e+08	1.19053e+08	3.61535e+07	3.53299e+07	5.02797e+07	8.72734e+07	7.38503e+07	8.41516e+07	8.53118e+07	1.07037e+08	1.13663e+08	2.73607e+07	2.37409e+07	4.40684e+07	6.18073e+07	4.7375e+07	8.41516e+07	18	19	19	14	14	18	15	17
High	P68400	Casein kinase II subunit alpha [OS=Homo sapiens]	0	FALSE	165.579	51	14	105	13	391	45.1	7.74	407.93	14	102.9	120.8	111.9	76.8	77.4	84.3	126.2	101.7	97.9	1.28704e+08	1.51132e+08	1.39983e+08	9.60417e+07	9.68388e+07	1.05494e+08	1.57856e+08	1.27147e+08	1.22416e+08	9.59572e+07	1.36708e+08	1.33645e+08	7.26837e+07	6.50736e+07	9.24616e+07	1.11794e+08	8.15647e+07	1.22416e+08	12	13	13	11	9	10	11	10
High	Q9Y2T3	guanine deaminase [OS=Homo sapiens]	0	FALSE	165.501	61	18	76	18	454	51	5.68	262.2	18	77	84.6	90	220.5	205.4	186.5	12.7	7.8	15.6	4.03947e+07	4.43698e+07	4.71747e+07	1.156e+08	1.07676e+08	9.78043e+07	6.65257e+06	4.07306e+06	8.16829e+06	3.01168e+07	4.01354e+07	4.50388e+07	87485051	7.23561e+07	8.5722e+07	4.71136e+06	2.61287e+06	8.16829e+06	16	14	16	19	17	17	6	7
High	P20674	Cytochrome c oxidase subunit 5A, mitochondrial [OS=Homo sapiens]	0	FALSE	165.186	51	7	115	7	150	16.8	6.79	463.95	7	151.6	132.9	112.3	80.1	74.8	72.9	89.9	93	92.6	2.83323e+08	2.48411e+08	2.09916e+08	1.49659e+08	1.39755e+08	1.36343e+08	1.68035e+08	1.73944e+08	1.73049e+08	2.11235e+08	2.24704e+08	2.00412e+08	1.13261e+08	9.39127e+07	1.195e+08	1.19003e+08	1.11585e+08	1.73049e+08	9	9	9	9	7	8	9	8
High	Q8IVT2	Mitotic interactor and substrate of PLK1 [OS=Homo sapiens]	0	FALSE	164.956	43	18	67	18	679	75.3	6.83	221.57	18	30.3	34.3	32	110.6	125.7	124.1	145.4	164.3	133.3	1.36235e+07	1.53917e+07	1.4359e+07	4.97166e+07	5.65025e+07	5.57681e+07	6.53336e+07	7.38117e+07	5.98959e+07	1.01572e+07	1.39228e+07	1.37089e+07	3.76252e+07	3.79685e+07	4.88788e+07	4.62694e+07	4.73503e+07	5.98959e+07	10	12	11	14	16	16	15	15
High	Q96PK6-1	RNA-binding protein 14 [OS=Homo sapiens]	0	FALSE	164.828	36	18	114	18	669	69.4	9.67	380.85	18	76.6	88.1	109.4	85.5	79.2	87.3	126.4	122.2	125.2	1.08404e+08	1.24671e+08	1.54892e+08	1.21048e+08	1.12055e+08	123525209	1.78889e+08	1.73004e+08	1.77215e+08	8.08223e+07	1.12773e+08	1.47879e+08	9.16087e+07	7.52984e+07	1.08266e+08	1.2669e+08	1.10982e+08	1.77215e+08	19	18	20	18	17	19	19	17
High	O95994	Anterior gradient protein 2 homolog [OS=Homo sapiens]	0	FALSE	164.629	56	9	93	8	175	20	9	378.13	9	0.5	0.5	0.2	324.2	260.6	313	0.8		0.2	749938	790639	302927	5.13075e+08	4.12334e+08	4.95325e+08	1.32586e+06		240009	559126	715185	289211	3.88291e+08	2.7708e+08	4.34135e+08	938980		240009	1	2	1	10	10	10	2
High	Q14997	Proteasome activator complex subunit 4 [OS=Homo sapiens]	0	FALSE	164.027	20	18	60	18	1843	211.2	6.9	193.08	18	97.8	87	89.3	106.2	92.1	99.4	103.8	122	102.5	1.9275e+07	1.71464e+07	1.7606e+07	2.0933e+07	1.81533e+07	1.95886e+07	2.04743e+07	2.40506e+07	2.02136e+07	1.43707e+07	1.551e+07	1.68089e+07	1.58419e+07	1.21986e+07	1.71687e+07	1.44999e+07	1.54285e+07	2.02136e+07	16	16	16	13	13	16	16	15
High	P61619	Protein transport protein Sec61 subunit alpha isoform 1 [OS=Homo sapiens]	0	FALSE	164.023	43	12	121	9	476	52.2	8.06	422.33	12	85.7	70.6	82.2	123	109.8	109	104.8	125	90	5.00498e+07	4.12219e+07	4.8018e+07	7.187e+07	6.41566e+07	6.36546e+07	6.12055e+07	7.30012e+07	5.25854e+07	3.73153e+07	3.72879e+07	4.5844e+07	5.43907e+07	4.31119e+07	5.5791e+07	4.33459e+07	4.68303e+07	5.25854e+07	10	11	12	13	12	13	13	10
High	Q96G03	Phosphoglucomutase-2 [OS=Homo sapiens]	0	FALSE	163.986	52	21	105	21	612	68.2	6.73	327.44	21	103.5	86.5	94.1	102.3	104	88.9	129	109.6	82.1	4.32637e+07	3.61931e+07	3.93354e+07	4.27825e+07	4.34843e+07	3.71925e+07	5.39359e+07	4.58214e+07	3.43506e+07	3.22558e+07	3.2739e+07	3.75545e+07	3.23775e+07	2.92205e+07	3.25979e+07	3.81975e+07	2.93945e+07	3.43506e+07	16	14	14	13	15	14	15	15
High	O60502	protein O-GlcNAcase [OS=Homo sapiens]	0	FALSE	163.972	33	20	90	20	916	102.8	4.91	266.69	20	132.4	153.5	158.7	96.9	79.3	111.7	59.8	51.8	55.8	7.79268e+07	9.03399e+07	9.34067e+07	5.70097e+07	4.66828e+07	6.57164e+07	3.51779e+07	3.04689e+07	3.28542e+07	5.80993e+07	8.17183e+07	8.91777e+07	4.31446e+07	3.13699e+07	5.75981e+07	2.49131e+07	1.95458e+07	3.28542e+07	16	19	17	15	14	16	15	13
High	Q99439	Calponin-2 [OS=Homo sapiens]	0	FALSE	163.941	83	16	126	15	309	33.7	7.33	417.65	16	64.5	91.2	99.3	93.2	81.9	137.2	95.5	70.1	167.1	4.72976e+07	6.69176e+07	7.28571e+07	6.83272e+07	6.00682e+07	1.00668e+08	7.00189e+07	5.14014e+07	122588456	3.52633e+07	6.05313e+07	6.95585e+07	5.17096e+07	4.03646e+07	8.82318e+07	4.95876e+07	3.2974e+07	122588456	9	14	14	12	10	13	11	9
High	Q9HAW8	UDP-glucuronosyltransferase 1-10 [OS=Homo sapiens]	0	FALSE	163.925	54	15	45	6	530	59.8	7.3	184.5	15	8.7	7		325.3	279.7	258.2	1.1	11.9	8.2	2.96269e+06	2.38919e+06		1.11166e+08	9.55707e+07	8.82321e+07	390223	4.06332e+06	2.79085e+06	2.20887e+06	2.16118e+06		8.41293e+07	6.42215e+07	7.73323e+07	276357	2.60662e+06	2.79085e+06	1	2		6	7	7	1	1
High	Q9BY44-1	Eukaryotic translation initiation factor 2A [OS=Homo sapiens]	0	FALSE	163.887	46	17	107	17	585	64.9	8.87	357.79	17	56.9	54.7	53.2	151.1	151.4	141.7	94.3	97	99.8	4.71145e+07	4.52586e+07	4.39909e+07	1.2502e+08	1.25298e+08	1.17229e+08	7.80777e+07	8.02724e+07	8.25701e+07	3.51268e+07	4.09393e+07	4.19992e+07	9.46143e+07	84197686	1.02747e+08	5.52948e+07	5.14948e+07	8.25701e+07	13	16	14	15	13	18	14	14
High	P22087	rRNA 2'-O-methyltransferase fibrillarin [OS=Homo sapiens]	0	FALSE	163.772	53	13	104	13	321	33.8	10.18	407.9	13	139.8	114.3	109.2	56.6	63.4	64	125.9	114.9	112	2.19673e+08	1.79643e+08	1.7163e+08	8.8885e+07	9.97073e+07	1.00536e+08	1.97861e+08	1.8066e+08	1.75968e+08	1.6378e+08	1.62499e+08	1.63859e+08	6.72676e+07	6.70012e+07	8.81159e+07	1.40126e+08	1.15894e+08	1.75968e+08	11	12	13	10	9	11	12	10
High	Q07065	Cytoskeleton-associated protein 4 [OS=Homo sapiens]	0	FALSE	163.743	46	22	119	22	602	66	5.92	376.26	22	171.6	201.1	185.2	71.5	70.9	68	45.3	43.2	43.1	1.56321e+08	1.83261e+08	1.68771e+08	6.51445e+07	64615590	6.2003e+07	4.13044e+07	3.93395e+07	3.92896e+07	1.16547e+08	1.65771e+08	1.61129e+08	4.93009e+07	4.34203e+07	5.43435e+07	2.92519e+07	2.52363e+07	3.92896e+07	19	20	20	15	16	17	15	14
High	Q07960	rho GTPase-activating protein 1 [OS=Homo sapiens]	0	FALSE	163.578	60	17	94	17	439	50.4	6.29	292.49	17	67.8	62.8	63.5	141.8	141	129.4	89.4	111.2	93.1	5.74995e+07	5.32914e+07	5.38701e+07	1.20271e+08	1.19632e+08	1.09808e+08	7.58513e+07	9.43834e+07	7.89588e+07	4.28695e+07	4.82055e+07	5.14311e+07	9.10204e+07	8.039e+07	9.62425e+07	5.37181e+07	6.0547e+07	7.89588e+07	14	14	13	16	16	15	14	14
High	Q9Y285	Phenylalanine--tRNA ligase alpha subunit [OS=Homo sapiens]	0	FALSE	162.88	58	18	97	18	508	57.5	7.8	351.91	18	124.2	119.3	95.2	82.7	82.2	82	112.6	114.4	87.3	1.74102e+08	1.67143e+08	1.33466e+08	1.15868e+08	1.15186e+08	1.14951e+08	1.57851e+08	1.60353e+08	1.2228e+08	1.29804e+08	1.51192e+08	1.27424e+08	8.7688e+07	7.74024e+07	1.00751e+08	1.11791e+08	1.02867e+08	1.2228e+08	15	17	16	13	10	14	15	13
High	Q7L2E3-1	Putative ATP-dependent RNA helicase DHX30 [OS=Homo sapiens]	0	FALSE	162.785	26	24	88	24	1194	133.9	8.78	247	24	148.8	135.9	135.8	45	40.1	42	110.1	124.9	117.3	9.39112e+07	8.57451e+07	8.57274e+07	2.84045e+07	2.52966e+07	2.64909e+07	6.94969e+07	7.88424e+07	7.40291e+07	7.00167e+07	7.7562e+07	8.18461e+07	2.14963e+07	1.69988e+07	2.32184e+07	4.92179e+07	5.05774e+07	7.40291e+07	21	22	22	18	15	18	20	19
High	P61586	Transforming protein RhoA [OS=Homo sapiens]	0	FALSE	162.649	69	13	166	5	193	21.8	6.1	589.35	13	88.2	137.9	172.5	63.9	38.7	90.9	75.1	65.4	167.4	3.238e+07	5.06631e+07	6.33441e+07	2.34659e+07	1.42213e+07	3.33927e+07	2.76011e+07	2.40112e+07	6.14744e+07	2.41413e+07	4.58281e+07	6.04762e+07	1.77588e+07	9.55645e+06	2.92676e+07	1.95472e+07	1.54032e+07	6.14744e+07	4	4	4	4	3	4	4	3
High	O00303	Eukaryotic translation initiation factor 3 subunit F [OS=Homo sapiens]	0	FALSE	162.646	55	13	174	13	357	37.5	5.45	538.81	13	113.5	112.6	114.9	75	73.7	84	114.8	101.1	110.4	1.95836e+08	1.94417e+08	198305410	1.29528e+08	1.2713e+08	1.44957e+08	1.98194e+08	1.7441e+08	1.90535e+08	146007943	1.75862e+08	1.89327e+08	9.80262e+07	8.54284e+07	1.27049e+08	1.40361e+08	1.11884e+08	1.90535e+08	13	13	13	12	12	13	12	12
High	P39748	Flap endonuclease 1 [OS=Homo sapiens]	0	FALSE	162.62	57	14	164	14	380	42.6	8.62	572.86	14	104.2	111.1	100.4	97.3	99.1	95.5	111.9	92	88.6	1.94561e+08	2.07508e+08	1.87502e+08	1.81648e+08	1.8498e+08	1.78282e+08	2.08876e+08	1.71883e+08	1.65372e+08	1.45057e+08	1.87704e+08	1.79013e+08	1.3747e+08	1.24302e+08	1.56258e+08	1.47926e+08	1.10263e+08	1.65372e+08	15	15	14	16	14	16	14	13
High	P84085	ADP-ribosylation factor 5 [OS=Homo sapiens]	0	FALSE	162.356	72	11	137	5	180	20.5	6.79	532.33	11	82.1	80.1	72.5	136.1	137.8	86.1	178.2	96.5	30.5	3.80835e+07	3.71552e+07	3.36285e+07	63114867	6.38994e+07	3.9941e+07	8.2666e+07	4.47611e+07	1.4148e+07	2.83936e+07	3.36093e+07	3.2106e+07	4.77649e+07	4.29391e+07	3.50069e+07	5.85443e+07	2.87143e+07	1.4148e+07	5	4	4	4	4	5	5	4
High	Q9Y2A7-1	Nck-associated protein 1 [OS=Homo sapiens]	0	FALSE	162.255	24	16	63	16	1128	128.7	6.62	233.3	16	84	123.7	126.8	93.5	76.7	152.9	44	39.7	158.7	1.99253e+07	2.93388e+07	3.00805e+07	2.21896e+07	1.81855e+07	3.62784e+07	1.04325e+07	9.41466e+06	3.76487e+07	1.48555e+07	2.65388e+07	2.87186e+07	1.6793e+07	1.22203e+07	3.17967e+07	7.3883e+06	6.03951e+06	3.76487e+07	15	13	13	14	15	15	10	12
High	Q16777	Histone H2A type 2-C [OS=Homo sapiens]	0	FALSE	162.131	61	8	209	4	129	14	10.9	728.57	8	170.7	119.6	62	39.7	43.6	51.7	219	96	97.6	3.30995e+08	2.31872e+08	1.20242e+08	7.69737e+07	8.45548e+07	100178994	4.24558e+08	1.86181e+08	1.89241e+08	2.46777e+08	2.09743e+08	1.14798e+08	5.82532e+07	5.68191e+07	8.78034e+07	3.00673e+08	1.19436e+08	1.89241e+08	7	6	6	5	5	5	6	5
High	Q8IY81	pre-rRNA processing protein FTSJ3 [OS=Homo sapiens]	0	FALSE	162.019	30	17	74	17	847	96.5	8.4	229.12	17	170.3	128.8	112.3	51.5	44	44.3	139.4	103.3	106	3.64221e+07	2.75416e+07	2.40185e+07	1.10214e+07	9.41869e+06	9.47764e+06	2.98048e+07	2.20915e+07	2.2665e+07	2.71549e+07	2.49132e+07	2.29311e+07	8.3409e+06	6.32916e+06	8.30682e+06	2.11079e+07	1.41717e+07	2.2665e+07	15	15	16	12	12	12	15	15
High	Q9UBF2	Coatomer subunit gamma-2 [OS=Homo sapiens]	0	FALSE	161.998	32	17	112	16	871	97.6	5.81	380.03	17	106.3	87.3	92.4	132.5	138.3	118	85.7	77.9	61.6	3.71818e+07	3.05266e+07	3.23051e+07	4.6329e+07	4.83535e+07	4.12737e+07	2.99737e+07	2.72539e+07	2.15305e+07	2.77214e+07	2.76133e+07	3.08425e+07	3.50615e+07	3.24926e+07	3.6175e+07	2.12274e+07	1.74834e+07	2.15305e+07	18	16	16	16	15	16	14	14
High	O60547	GDP-mannose 4,6 dehydratase [OS=Homo sapiens]	0	FALSE	161.9	53	15	96	15	372	41.9	7.31	325.66	15	14.5	16.6	15.3	146.8	152.7	127.9	142.8	153.6	129.8	1.45963e+07	1.66805e+07	1.53252e+07	1.47316e+08	1.53217e+08	1.28381e+08	1.43357e+08	1.5412e+08	1.30229e+08	1.08825e+07	1.50886e+07	1.46313e+07	1.11488e+08	1.02959e+08	1.12522e+08	1.01526e+08	9.88681e+07	1.30229e+08	2	4	3	16	16	16	14	16
High	P62241	40S ribosomal protein S8 [OS=Homo sapiens]	0	FALSE	161.806	61	16	220	16	208	24.2	10.32	689.66	16	102	98.8	91.1	92.6	103.3	98	114.5	112.7	87	1074284328	1040380590	9.5928e+08	9.75503e+08	1087743070	1031717032	1205361007	1187335755	9.16132e+08	8.00946e+08	9.41092e+08	915848037	7.38254e+08	7.30941e+08	9.04264e+08	8.5364e+08	7.61677e+08	9.16132e+08	18	17	17	19	19	17	19	19
High	O95071	E3 ubiquitin-protein ligase UBR5 [OS=Homo sapiens]	0	FALSE	161.774	9	16	106	16	2799	309.2	5.85	318.19	16	99.6	76.6	79.7	115.4	112.7	105.8	106.2	114.3	89.7	3.13405e+07	2.41157e+07	2.50944e+07	3.63226e+07	3.54806e+07	3.33202e+07	3.34443e+07	3.597e+07	2.82431e+07	2.33663e+07	2.18142e+07	2.39582e+07	2.74887e+07	2.38422e+07	2.9204e+07	2.36853e+07	2.30748e+07	2.82431e+07	15	13	14	14	13	15	14	12
High	O60488-1	Long-chain-fatty-acid--CoA ligase 4 [OS=Homo sapiens]	0	FALSE	161.736	44	19	99	17	711	79.1	8.38	346.27	19	72.8	75.1	73.6	147.6	139.3	128.9	95	88.2	79.5	4.33062e+07	4.47055e+07	4.38163e+07	8.78107e+07	8.29146e+07	7.6712e+07	5.65143e+07	5.25167e+07	4.73046e+07	3.22875e+07	4.0439e+07	4.18325e+07	6.64546e+07	5.57169e+07	6.72354e+07	4.00236e+07	3.36895e+07	4.73046e+07	16	17	17	16	14	17	16	14
High	Q9UKX7	Nuclear pore complex protein Nup50 [OS=Homo sapiens]	0	FALSE	161.428	53	16	67	16	468	50.1	7.06	239.41	16	92.1	98.8	101.6	69.2	77.8	71.7	103.6	155.8	129.4	3.03557e+07	32555749	3.34902e+07	2.27896e+07	2.56382e+07	2.36391e+07	3.41299e+07	5.13189e+07	4.2621e+07	2.26321e+07	2.94488e+07	3.19739e+07	1.7247e+07	1.72284e+07	2.07188e+07	2.41709e+07	3.29211e+07	4.2621e+07	12	12	15	12	12	13	13	12
High	Q13155	aminoacyl tRNA synthase complex-interacting multifunctional protein 2 [OS=Homo sapiens]	0	FALSE	161.298	68	13	129	13	320	35.3	8.22	467.93	13	70.6	74.1	87.2	106.2	107.7	98	110.7	126.3	119.2	7.16936e+07	7.53259e+07	8.86112e+07	1.07899e+08	1.09421e+08	9.958e+07	1.12477e+08	1.28266e+08	1.2106e+08	5.34521e+07	6.81372e+07	8.45993e+07	8.16573e+07	7.35289e+07	8.72784e+07	7.96566e+07	8.22828e+07	1.2106e+08	12	13	14	16	14	15	13	15
High	P62495	Eukaryotic peptide chain release factor subunit 1 [OS=Homo sapiens]	0	FALSE	161.2	54	16	131	16	437	49	5.71	457.32	16	90.9	82	78.4	103.3	108.6	98.7	106.1	127.6	104.5	1.11146e+08	100173845	9.58063e+07	1.26198e+08	1.32695e+08	1.20664e+08	1.29628e+08	1.55941e+08	1.27657e+08	8.28661e+07	9.06138e+07	9.14686e+07	9.55056e+07	89168571	1.05758e+08	9.18026e+07	1.00036e+08	1.27657e+08	16	17	16	17	15	16	15	17
High	Q53GS9	U4/U6.U5 tri-snRNP-associated protein 2 [OS=Homo sapiens]	0	FALSE	160.832	46	21	124	21	565	65.3	8.91	436.86	21	119	117.7	118.3	70.3	68.9	56.1	134.1	111.5	104	6.96673e+07	6.89462e+07	69300773	4.11654e+07	4.03342e+07	3.28748e+07	7.8556e+07	6.52731e+07	6.09256e+07	5.19413e+07	6.23663e+07	6.61631e+07	3.11537e+07	2.71038e+07	2.88137e+07	5.56336e+07	4.18727e+07	6.09256e+07	21	21	21	19	17	19	20	18
High	P22570-6	Isoform 6 of NADPH:adrenodoxin oxidoreductase, mitochondrial [OS=Homo sapiens]	0	FALSE	160.203	67	20	73	1	451	49.4	8.66	233.4	20	173.9	277.5	186.5	40.1	51.9	46.2	37.1	28.3	58.6	654914	1.0453e+06	702416	150920	195483	173939	139879	106500	220643	488280	945539	670614	114215	131361	152452	99062.7	68320.1	220643	1	1	1	1	1	1	1	1
High	P50995	annexin A11 [OS=Homo sapiens]	0	FALSE	159.651	35	18	126	17	505	54.4	7.65	431.94	18	76.8	79.7	75.3	115.3	120.3	110.6	120.5	107.3	94.2	2.27662e+08	2.35993e+08	2.23013e+08	3.4166e+08	3.56535e+08	3.2767e+08	3.57014e+08	3.17941e+08	2.79032e+08	1.69737e+08	2.13471e+08	2.12916e+08	2.58566e+08	2.39584e+08	2.87191e+08	2.52838e+08	2.03959e+08	2.79032e+08	17	17	17	17	16	17	16	16
High	Q6ZNJ1-1	Neurobeachin-like protein 2 [OS=Homo sapiens]	0	FALSE	159.524	18	19	60	19	2754	302.3	6.38	233.18	19	57.2	42.7	51.3	227.2	225.2	115.2	52	73.7	55.4	6.24054e+06	4.65306e+06	5.58908e+06	2.47825e+07	2.4564e+07	1.25647e+07	5.67591e+06	8.04275e+06	6.03652e+06	4.65272e+06	4.209e+06	5.33603e+06	1.87552e+07	1.65065e+07	1.10126e+07	4.01969e+06	5.15943e+06	6.03652e+06	10	15	14	18	18	16	14	11
High	P55263-1	Adenosine kinase [OS=Homo sapiens]	0	FALSE	159.459	56	16	91	16	362	40.5	6.7	302.33	16	69.6	72.2	75.1	63.5	63.6	56.7	166.8	183.2	149.3	6.19479e+07	6.42223e+07	6.68218e+07	5.65149e+07	5.65884e+07	5.04493e+07	1.48372e+08	1.63027e+08	1.3284e+08	4.6186e+07	5.80933e+07	6.37964e+07	4.27701e+07	3.80263e+07	4.42171e+07	1.05078e+08	1.04582e+08	1.3284e+08	16	15	15	13	13	17	16	15
High	P62841	40S ribosomal protein S15 [OS=Homo sapiens]	0	FALSE	159.114	56	5	245	5	145	17	10.39	873.27	5	75.6	159.9	141.2	71.9	39.8	103.6	91.1	53.3	163.7	1.13374e+08	239892269	2.11852e+08	1.07915e+08	5.9766e+07	155382657	1.36731e+08	7.99814e+07	2.45593e+08	8.45271e+07	2.16998e+08	2.02261e+08	8.16695e+07	4.01615e+07	1.36187e+08	9.68335e+07	5.13081e+07	2.45593e+08	9	10	8	10	9	9	11	10
High	P62879	Guanine nucleotide-binding protein G(I)/G(S)/G(T) subunit beta-2 [OS=Homo sapiens]	0	FALSE	158.994	67	14	89	9	340	37.3	6	319.75	14	103	107.4	99.6	143.8	144.2	148.6	61.4	49.1	42.9	8.38801e+07	8.74762e+07	8.11235e+07	1.17159e+08	1.17479e+08	1.21008e+08	5.00236e+07	3.99677e+07	3.49315e+07	6.25378e+07	7.91279e+07	77450617	8.8665e+07	7.89434e+07	1.06059e+08	3.54268e+07	2.56393e+07	3.49315e+07	8	8	8	8	8	8	7	7
High	Q08209-1	Serine/threonine-protein phosphatase 2B catalytic subunit alpha isoform [OS=Homo sapiens]	0	FALSE	158.872	51	16	72	8	521	58.7	5.86	267.18	16	172	170.4	167.9	125.1	99.4	80.5	29.7	26.7	28.4	4.13773e+07	4.10007e+07	4.03932e+07	3.01002e+07	2.39242e+07	1.9373e+07	7.1359e+06	6.42648e+06	6837871	3.08494e+07	3.70878e+07	3.85644e+07	2.27796e+07	1.60766e+07	1.69797e+07	5.05366e+06	4.12259e+06	6837871	10	8	8	8	5	9	7	2
High	P11908	ribose-phosphate pyrophosphokinase 2 [OS=Homo sapiens]	0	FALSE	158.702	50	15	128	7	318	34.7	6.61	421.55	15	92.6	103.3	110.8	22.5	29.2	20.8	214.5	147.2	159.2	1.6155e+07	1.80166e+07	1.93254e+07	3.91729e+06	5.09793e+06	3.635e+06	3.74225e+07	2.56845e+07	2.77834e+07	1.20445e+07	1.62971e+07	1.84505e+07	2.96458e+06	3.42571e+06	3.18595e+06	2.65027e+07	1.64766e+07	2.77834e+07	6	7	7	3	3	3	6	6
High	P09382	Galectin-1 [OS=Homo sapiens]	0	FALSE	158.597	80	8	228	8	135	14.7	5.5	832.2	8	224	187.6	173.7	2.8	3	2.7	102.8	108.1	95.2	1904827885	1595398540	1476679626	2.39715e+07	2.54652e+07	2.32945e+07	8.73924e+08	9.19188e+08	8.09262e+08	1420168621	1443141925	1409822278	1.81415e+07	1.71121e+07	2.04168e+07	618915225	5.8966e+08	8.09262e+08	13	13	13	11	8	11	13	13
High	sp P63279	SUMO-conjugating enzyme ubc9 [OS=Homo sapiens]	0	TRUE	158.311	81	13	111	13	158	18	8.66	385.62	13	104.6	108.5	109.4	70.2	64.6	73.5	107.2	123.2	138.8	1.81924e+08	1.88612e+08	1.90245e+08	122063562	1.1222e+08	127789821	1.86351e+08	2.14114e+08	241263974	1.35636e+08	1.70612e+08	181631479	9.23769e+07	7.54098e+07	1.12003e+08	1.31974e+08	1.37354e+08	241263974	11	14	15	11	8	11	11	12
High	Q5UIP0	Telomere-associated protein RIF1 [OS=Homo sapiens]	0	FALSE	158.266	16	23	77	23	2472	274.3	5.52	233.64	23	56.9	47.5	56	72.7	77	70.3	164.4	196.4	158.9	1.30842e+07	1.09122e+07	1.28706e+07	1.67135e+07	1.76893e+07	1.61535e+07	3.77823e+07	4.51308e+07	3.65119e+07	9.75509e+06	9.87075e+06	1.22879e+07	1.26487e+07	1.18868e+07	1.4158e+07	26757544	2.89515e+07	3.65119e+07	13	15	16	11	13	17	18	15
High	Q14103	heterogeneous nuclear ribonucleoprotein D0 [OS=Homo sapiens]	0	FALSE	158.202	34	15	235	13	355	38.4	7.81	671.42	15	93.5	111.5	98.3	67.9	68.6	79.8	139.6	108.9	131.9	4.21438e+08	5.02514e+08	4.42687e+08	3.05897e+08	3.09112e+08	3.59311e+08	6.29013e+08	4.90389e+08	5.94105e+08	3.14208e+08	4.54556e+08	4.22644e+08	2.31501e+08	2.07717e+08	3.14923e+08	445468875	3.14585e+08	5.94105e+08	13	15	15	15	15	15	14	15
High	Q92817	Envoplakin [OS=Homo sapiens]	0	FALSE	158.175	17	19	59	19	2033	231.5	6.96	198.69	19	188.9	191.7	148.6	83.9	89.8	98.8	32.4	19.9	45.9	2.97258e+07	3.016e+07	2.33872e+07	13205287	1.4135e+07	1.55483e+07	5.09256e+06	3.13616e+06	7.22657e+06	2.21625e+07	2.72817e+07	2.23283e+07	9.99367e+06	9.4984e+06	1.36275e+07	3.60656e+06	2.01185e+06	7.22657e+06	16	17	17	13	14	16	9	5
High	Q9BXW7	Haloacid dehalogenase-like hydrolase domain-containing 5 [OS=Homo sapiens]	0	FALSE	158.097	46	11	76	11	423	46.3	8.13	296.35	11	141.3	138	143.3	52.7	47.9	56.9	90	86.9	143	5.6216e+07	5.48785e+07	5.70164e+07	2.0972e+07	1.90376e+07	2.26422e+07	3.58166e+07	3.45614e+07	5.68706e+07	4.19126e+07	4.96412e+07	5.4435e+07	15871440	1.27929e+07	1.98451e+07	2.53654e+07	2.21712e+07	5.68706e+07	13	11	12	10	6	10	10	9
High	P56545	c-terminal-binding protein 2 [OS=Homo sapiens]	0	FALSE	157.995	61	15	85	14	445	48.9	6.95	311.48	15	81.2	75.2	70.2	113.1	119.6	105	96	128.9	110.7	5.59581e+07	5.18384e+07	4.83717e+07	7.79655e+07	8.24522e+07	7.24025e+07	6.6192e+07	8.88758e+07	7.63117e+07	4.17203e+07	4.68912e+07	4.61816e+07	5.90038e+07	5.54061e+07	6.34583e+07	4.68774e+07	5.70139e+07	7.63117e+07	12	11	12	12	13	14	11	12
High	P20042	Eukaryotic translation initiation factor 2 subunit 2 [OS=Homo sapiens]	0	FALSE	157.756	48	17	171	17	333	38.4	5.8	520.85	17	94.9	94	95.5	75.2	75.4	82.6	144.4	125	113	1.31107e+08	1.29826e+08	1.31869e+08	1.03935e+08	1.04126e+08	1.14052e+08	1.99451e+08	1.72738e+08	1.56114e+08	9.77487e+07	1.17436e+08	1.25899e+08	7.86571e+07	6.99706e+07	9.99623e+07	1.41252e+08	1.10812e+08	1.56114e+08	16	17	17	16	15	17	17	15
High	P49773	Histidine triad nucleotide-binding protein 1 [OS=Homo sapiens]	0	FALSE	157.669	72	7	70	7	126	13.8	6.95	276.73	7	93.4	105.5	86.7	95.9	79.3	94.5	106.6	111.6	126.5	1.95768e+08	221241380	1.81789e+08	2.01123e+08	1.66334e+08	1.98058e+08	2.23577e+08	233948714	2.65228e+08	1.45958e+08	2.00127e+08	1.73559e+08	1.52209e+08	111772890	1.73591e+08	1.58337e+08	1.50078e+08	2.65228e+08	7	7	8	8	7	9	8	7
High	P61163	Alpha-centractin [OS=Homo sapiens]	0	FALSE	157.472	54	12	121	8	376	42.6	6.64	453.8	12	118.7	126.4	117.5	85.5	104.8	82.1	105.1	88.4	71.4	5.27663e+07	5.61898e+07	5.22267e+07	3.80137e+07	4.65646e+07	3.64809e+07	4.67087e+07	3.92643e+07	3.17355e+07	3.93406e+07	50827328	4.98621e+07	2.87685e+07	3.12905e+07	31974236	3.30792e+07	2.51881e+07	3.17355e+07	7	7	8	7	8	6	6	6
High	Q8N3C0	Activating signal cointegrator 1 complex subunit 3 [OS=Homo sapiens]	0	FALSE	157.402	19	20	96	20	2202	251.3	7.09	286.41	20	106.3	94.1	94.6	115.7	104.3	104	85.5	113.3	82.1	1.91696e+07	1.69758e+07	1.70681e+07	2.08589e+07	1.88172e+07	1.87479e+07	1.54284e+07	2.04317e+07	1.4813e+07	1.42921e+07	1.53557e+07	1.62953e+07	1.57859e+07	1.26448e+07	1.64319e+07	1.09265e+07	1.3107e+07	1.4813e+07	20	20	20	19	18	20	17	18
High	P16402	Histone H1.3 [OS=Homo sapiens]	0	FALSE	157.284	27	12	235	1	221	22.3	11.02	798.3	12	84	115.8	124.9	70.3	90.8	91.5	93.2	85.1	144.4	9.95971e+06	1.37232e+07	1.48069e+07	8.33518e+06	1.07611e+07	1.08512e+07	1.10501e+07	1.00869e+07	1.71208e+07	7.42559e+06	1.24135e+07	1.41365e+07	6.30801e+06	7.2312e+06	9.51067e+06	7.82571e+06	6.47075e+06	1.71208e+07	1	1	1	1	1	1	1	1
High	P28482	mitogen-activated protein kinase 1 [OS=Homo sapiens]	0	FALSE	157.139	62	15	80	8	360	41.4	6.98	273.34	15	105.8	122.6	118.6	85.7	75.9	87.7	103.8	94.4	105.4	3.56344e+07	4.13026e+07	3.99598e+07	2.88788e+07	2.55624e+07	2.95415e+07	3.49651e+07	3.17979e+07	3.55048e+07	2.65677e+07	3.73609e+07	3.81506e+07	2.18553e+07	1.71774e+07	2.58921e+07	2.47624e+07	2.03984e+07	3.55048e+07	6	9	7	5	5	8	6	5
High	Q5SSJ5-1	Heterochromatin protein 1-binding protein 3 [OS=Homo sapiens]	0	FALSE	156.658	33	17	114	17	553	61.2	9.67	395.01	17	153.5	128	150.9	103.7	98.6	88.3	57.3	60.9	58.9	1.84101e+08	1.53549e+08	1.80967e+08	1.24413e+08	1.18258e+08	1.05971e+08	6.8693e+07	7.30309e+07	7.0623e+07	1.37259e+08	1.38895e+08	1.72774e+08	9.41551e+07	7.94669e+07	9.288e+07	4.86485e+07	4.68494e+07	7.0623e+07	17	17	17	16	15	17	16	14
High	Q13362	Serine/threonine-protein phosphatase 2A 56 kDa regulatory subunit gamma isoform [OS=Homo sapiens]	0	FALSE	156.564	36	11	87	4	524	61	6.87	257.96	11	47.8	83.3	70.6	73.1	60.3	113	148.6	64.7	238.8	2.06437e+06	3.59742e+06	3.04958e+06	3.15775e+06	2.60413e+06	4.88326e+06	6.42134e+06	2.79454e+06	1.03185e+07	1.53912e+06	3.2541e+06	2.91151e+06	2.38976e+06	1.74992e+06	4.28001e+06	4.54761e+06	1.7927e+06	1.03185e+07	4	4	3	3	4	4	4	2
High	Q15637-6	Isoform 6 of Splicing factor 1 [OS=Homo sapiens]	0	FALSE	156.418	33	14	102	14	571	61.9	9.28	342	14	93.3	108.2	114.3	93.7	82.7	94.3	88.6	108.9	116	1.2745e+08	1.47793e+08	1.56195e+08	1.28029e+08	1.12953e+08	1.28882e+08	1.21045e+08	148795850	158537570	9.50218e+07	1.33688e+08	1.49124e+08	9.68918e+07	7.59017e+07	1.1296e+08	8.57241e+07	9.54526e+07	158537570	11	14	13	11	10	12	11	11
High	Q99627-1	COP9 signalosome complex subunit 8 [OS=Homo sapiens]	0	FALSE	155.79	70	7	75	7	209	23.2	5.38	235.15	7	94.6	100.9	103.1	82.3	82.9	98.3	116.3	113.1	108.5	2.12303e+07	2.2642e+07	2.31443e+07	1.84714e+07	1.86004e+07	2.20682e+07	2.6108e+07	2.53725e+07	2.43497e+07	1.58285e+07	2.04811e+07	2.20964e+07	1.3979e+07	1.24991e+07	1.9342e+07	1.84897e+07	1.62765e+07	2.43497e+07	8	9	9	8	8	9	8	8
High	P01009-1	alpha-1-antitrypsin [OS=Homo sapiens]	0	FALSE	155.76	44	14	52	14	418	46.7	5.59	175.07	14	6.6	4.5	4.9	305.2	285.9	282.1	5.8	4.5	0.6	3.45411e+06	2.33068e+06	2.55097e+06	1.58985e+08	1.48924e+08	1.46936e+08	3.01451e+06	2.34248e+06	303424	2.57526e+06	2.10825e+06	2.43548e+06	1.20319e+08	1.00074e+08	1.28784e+08	2.13488e+06	1502700	303424	2	1	2	16	17	16	5	3
High	P34955	SWISS-PROT:P34955 (Bos taurus) Alpha-1-antiproteinase precursor	0	TRUE	155.426	36	13	133	13	416	46.1	6.52	462.03	13	45.3	56.5	110.3	98.5	183.8	60.1	49	111.8	184.9	5.70574e+07	7.10603e+07	1.38868e+08	1.23934e+08	231324946	7.55929e+07	6.16785e+07	1.40693e+08	2.32724e+08	4.25399e+07	6.42787e+07	1.32581e+08	9.37922e+07	1.55446e+08	6.62545e+07	4.36809e+07	9.0255e+07	2.32724e+08	14	15	15	15	15	15	13	14
High	O60287	nucleolar pre-ribosomal-associated protein 1 [OS=Homo sapiens]	0	FALSE	155.423	12	15	110	15	2271	254.2	6.47	338.11	15	88.5	69.3	83.9	85.2	77.7	63.8	151.3	165	115.2	1.63575e+07	1.28148e+07	1.55077e+07	1.57486e+07	1.43552e+07	1.17976e+07	2.79661e+07	3.04936e+07	2.12961e+07	1.21956e+07	1.15919e+07	1.48056e+07	1.19184e+07	9.64638e+06	1.03402e+07	1.98056e+07	1.95617e+07	2.12961e+07	13	14	14	16	14	15	14	16
High	Q96AG4	Leucine-rich repeat-containing protein 59 [OS=Homo sapiens]	0	FALSE	155.377	48	12	136	12	307	34.9	9.57	470.66	12	144.5	119.3	108.3	80.7	77	81	100.5	99.8	88.9	5.08706e+08	4.19894e+08	380974240	2.83902e+08	2.70902e+08	2.85198e+08	3.53557e+08	3.51364e+08	312902308	3.79272e+08	3.79821e+08	3.63725e+08	2.14855e+08	1.8204e+08	249965796	2.5039e+08	2.254e+08	312902308	12	12	12	12	11	12	12	12
High	Q14155-1	Isoform 1 of Rho guanine nucleotide exchange factor 7 [OS=Homo sapiens]	0	FALSE	155.323	34	13	95	13	646	73.1	7.21	352.12	13	89	94.3	93.3	81	78.9	81.3	147.2	113.8	121.3	1.85096e+07	1.96239e+07	1.9416e+07	1.68474e+07	1.64114e+07	1.69072e+07	3.06399e+07	2.36815e+07	2.52394e+07	1.38001e+07	1.77511e+07	1.8537e+07	1.275e+07	1.10281e+07	1.48185e+07	2.16993e+07	1.51917e+07	2.52394e+07	10	13	14	10	9	13	11	9
High	Q96C36	Pyrroline-5-carboxylate reductase 2 [OS=Homo sapiens]	0	FALSE	155.124	55	14	111	13	320	33.6	7.77	429.35	14	132.4	149.3	157.1	58.3	50.5	72.1	75.6	79.1	125.7	7.9532e+07	8.96621e+07	9.43855e+07	3.50035e+07	3.03395e+07	4.3292e+07	4.54321e+07	4.74998e+07	7.54983e+07	5.92961e+07	8.11052e+07	9.01122e+07	2.64904e+07	2.03875e+07	3.79439e+07	3.21751e+07	3.04712e+07	7.54983e+07	13	12	12	13	11	11	13	13
High	P12532	Creatine kinase U-type, mitochondrial [OS=Homo sapiens]	0	FALSE	155.071	46	13	101	13	417	47	8.34	378.14	13	146.9	144.6	129.2	64	72.7	65.7	96.4	92.5	88	7.94812e+07	7.82703e+07	6.9945e+07	3.46274e+07	39371860	3.55327e+07	5.21719e+07	5.0073e+07	4.76024e+07	5.92582e+07	7.08006e+07	6.67782e+07	2.62058e+07	2.64571e+07	3.11432e+07	3.69483e+07	3.21219e+07	4.76024e+07	12	12	12	11	11	13	12	12
High	O75792	Ribonuclease H2 subunit A [OS=Homo sapiens]	0	FALSE	154.843	59	11	52	11	299	33.4	5.25	165.54	11	93.1	103.7	94.8	77.4	86.3	78.3	123.7	119.3	123.4	3.04515e+07	3.39271e+07	3.10105e+07	2.53263e+07	2.82117e+07	2.55962e+07	4.04504e+07	3.90361e+07	4.03613e+07	2.27035e+07	3.06892e+07	2.96065e+07	19166770	1.89577e+07	2.24342e+07	2.86471e+07	2.50417e+07	4.03613e+07	7	9	11	8	7	10	9	10
High	P00966	Argininosuccinate synthase [OS=Homo sapiens]	0	FALSE	154.815	55	19	82	19	412	46.5	8.02	287	19	46.7	41.5	40.4	56	53.1	40.9	198.3	220.6	202.5	6.86159e+07	6.09639e+07	5.92819e+07	8.22707e+07	7.79665e+07	6.00517e+07	2.91263e+08	3.23918e+08	2.9748e+08	5.11574e+07	5.51459e+07	5.65979e+07	6.22619e+07	5.23919e+07	5.26332e+07	2.06273e+08	2.07794e+08	2.9748e+08	17	17	18	17	14	14	19	16
High	Q9UHY7	Enolase-phosphatase E1 [OS=Homo sapiens]	0	FALSE	154.768	57	11	63	11	261	28.9	4.78	253.49	11	88.2	81.7	71.5	141.7	118	98.5	114	109.3	77	2.66254e+07	2.46607e+07	2.15888e+07	4.27693e+07	3.56239e+07	2.97346e+07	3.44104e+07	3.30006e+07	2.32489e+07	1.98509e+07	2.23072e+07	2.06113e+07	3.23675e+07	2.39385e+07	2.60613e+07	2.43695e+07	2.11699e+07	2.32489e+07	8	10	11	10	8	8	8	8
High	O60313-2	Isoform 2 of Dynamin-like 120 kDa protein, mitochondrial [OS=Homo sapiens]	0	FALSE	154.636	36	23	101	23	997	115.8	7.87	318.8	23	87.1	75.1	68.3	81.7	88	86.3	158.1	133	122.4	4.1192e+07	3.55202e+07	3.23057e+07	3.86602e+07	4.16229e+07	4.08339e+07	7.4818e+07	6.2945e+07	5.79037e+07	3.07112e+07	3.21304e+07	3.0843e+07	2.92578e+07	2.79697e+07	3.57895e+07	5.29863e+07	4.03792e+07	5.79037e+07	20	19	18	18	18	19	19	19
High	Q13576-1	Ras GTPase-activating-like protein IQGAP2 [OS=Homo sapiens]	0	FALSE	154.603	20	18	46	16	1575	180.5	5.64	164.44	18	9.9	15	7.2	372.9	302.3	169.1	16.4		7.2	796673	1.20996e+06	581923	3.01233e+07	2.44151e+07	1.36615e+07	1.32389e+06		581529	593970	1.09449e+06	555577	2.27971e+07	1.64065e+07	1.19739e+07	937581		581529	3	3	1	11	11	10	1
High	P50416	Carnitine O-palmitoyltransferase 1, liver isoform [OS=Homo sapiens]	0	FALSE	154.571	37	21	104	21	773	88.3	8.65	308.84	21	71.8	78.8	73.7	79.1	87.2	83.9	149.9	136.9	138.7	6.14847e+07	6.74581e+07	6.30509e+07	6.76771e+07	7.46486e+07	7.17914e+07	1.28344e+08	1.17224e+08	1.18695e+08	4.58407e+07	6.10202e+07	6.01963e+07	5.12176e+07	5.01623e+07	6.29227e+07	9.08937e+07	7.5199e+07	1.18695e+08	14	19	18	16	15	19	19	16
High	P26358-1	DNA (cytosine-5)-methyltransferase 1 [OS=Homo sapiens]	0	FALSE	154.562	22	27	89	27	1616	183.1	7.75	246.13	27	107.2	103.8	104.3	59.5	63.7	57.3	147.9	145.6	110.7	1.23638e+08	1.19751e+08	1.20337e+08	6.86155e+07	7.343e+07	6.61404e+07	1.70527e+08	1.6791e+08	1.27668e+08	9.21797e+07	1.08323e+08	1.14888e+08	5.19277e+07	4.93434e+07	57969752	1.20768e+08	107714504	1.27668e+08	21	20	22	17	19	16	22	22
High	Q92878	DNA repair protein Rad50 [OS=Homo sapiens]	0	FALSE	154.462	16	17	59	17	1312	153.8	6.89	184.28	17	45.2	44.5	37.3	196.5	206	191.8	64.1	66.7	47.8	1.00994e+07	9.96084e+06	8.33046e+06	4.39391e+07	4.6066e+07	4.28923e+07	1.43381e+07	1.49254e+07	1.06936e+07	7.52974e+06	9.01023e+06	7.95329e+06	3.32528e+07	3.09554e+07	3.75936e+07	1.01543e+07	9.57465e+06	1.06936e+07	10	9	12	14	14	15	13	12
High	O95202-1	mitochondrial proton/calcium exchanger protein [OS=Homo sapiens]	0	FALSE	154.15	32	19	96	19	739	83.3	6.7	305.2	19	94.6	116.2	125.6	74	71.6	83.9	124.1	96	114.1	7.62324e+07	9.36784e+07	1.01215e+08	5.96435e+07	5.77383e+07	6.76132e+07	9.99872e+07	7.73434e+07	9.19523e+07	5.68361e+07	8.47382e+07	9.66322e+07	4.51378e+07	3.87989e+07	5.92606e+07	7.08112e+07	4.96158e+07	9.19523e+07	16	19	20	16	16	19	16	16
High	O95163	Elongator complex protein 1 [OS=Homo sapiens]	0	FALSE	154.119	25	20	70	20	1332	150.2	5.94	224.49	20	120.3	111.7	121.3	65.6	71.8	66.7	108.8	128	105.9	4.54263e+07	4.2178e+07	4.58044e+07	2.47736e+07	2.71107e+07	2.51789e+07	4.10856e+07	4.83313e+07	4.00022e+07	3.38682e+07	3.81527e+07	4.37306e+07	1.87485e+07	1.82178e+07	2.20684e+07	2.9097e+07	3.10045e+07	4.00022e+07	15	17	18	14	14	13	14	14
High	Q53GQ0	Very-long-chain 3-oxoacyl-CoA reductase [OS=Homo sapiens]	0	FALSE	154.095	60	13	95	13	312	34.3	9.32	330.55	13	59.7	56.4	54.1	135.9	146.3	126.4	100.8	111	109.3	5.59753e+07	5.2898e+07	5.0701e+07	127441785	1.37177e+08	1.18561e+08	9.45401e+07	1.04083e+08	1.02524e+08	4.17331e+07	4.78496e+07	4.84055e+07	9.64471e+07	9.218e+07	1.03915e+08	6.69535e+07	6.67694e+07	1.02524e+08	12	10	11	13	12	12	14	13
High	Q7L1Q6-1	Basic leucine zipper and W2 domain-containing protein 1 [OS=Homo sapiens]	0	FALSE	154.067	50	19	107	18	419	48	5.92	327.59	19	118	126.3	128.1	80.1	80.5	81.7	91.3	101.9	92.2	126264832	1.35134e+08	137121699	8.56765e+07	8.61131e+07	8.74335e+07	97734264	1.09099e+08	9.86292e+07	9.41383e+07	1.22238e+08	1.30913e+08	6.48394e+07	5.78662e+07	7.66324e+07	6.92156e+07	6.9987e+07	9.86292e+07	13	15	14	14	12	15	12	15
High	Q9NR31	GTP-binding protein SAR1a [OS=Homo sapiens]	0	FALSE	154	66	10	113	8	198	22.4	6.68	407.59	10	75.4	92.1	85.9	97.4	98.1	99.6	131.9	114.5	105.2	3.80341e+07	4.6486e+07	4.33535e+07	4.9135e+07	4.95224e+07	5.02504e+07	6.65356e+07	5.77592e+07	5.30715e+07	2.83568e+07	42049578	4.13906e+07	3.71851e+07	3.3278e+07	4.40427e+07	4.71207e+07	3.70526e+07	5.30715e+07	10	10	10	10	9	10	10	8
High	P61106	Ras-related protein Rab-14 [OS=Homo sapiens]	0	FALSE	153.822	71	15	113	13	215	23.9	6.21	391.59	15	82.9	99.8	88.2	118.1	126.6	129.6	97.5	74.8	82.4	9.07292e+07	1.09264e+08	9.65918e+07	1.29333e+08	1.38648e+08	1.41905e+08	106691217	8.19094e+07	9.02629e+07	6.76443e+07	9.88364e+07	9.22185e+07	9.78787e+07	9.31685e+07	1.24375e+08	7.5559e+07	5.25449e+07	9.02629e+07	13	13	13	12	13	13	12	12
High	Q6DD88	Atlastin-3 [OS=Homo sapiens]	0	FALSE	153.66	37	13	54	12	541	60.5	5.66	235.89	13	94.6	90.2	90.8	198.8	194	173.3	23.4	20.8	14.2	3.26534e+07	3.11386e+07	3.13326e+07	6.86262e+07	6.69544e+07	5.98172e+07	8.07113e+06	7.19762e+06	4.89894e+06	2.43451e+07	2.81669e+07	2.9914e+07	5.19359e+07	4.4992e+07	5.24277e+07	5.716e+06	4.61728e+06	4.89894e+06	12	12	11	12	12	11	8	8
High	P26440	Isovaleryl-CoA dehydrogenase, mitochondrial [OS=Homo sapiens]	0	FALSE	153.641	47	13	91	13	423	46.3	8.19	343.27	13	49.7	54.1	58.7	200	163.8	164.2	59.9	66	83.4	3.13674e+07	3.41379e+07	3.70479e+07	1.26169e+08	1.03337e+08	1.03557e+08	3.77679e+07	4.1639e+07	5.26291e+07	2.33863e+07	3.088e+07	3.53705e+07	9.54836e+07	6.94406e+07	9.07644e+07	2.67473e+07	2.67115e+07	5.26291e+07	9	13	14	14	14	15	9	8
High	Q13423	NAD(P) transhydrogenase, mitochondrial [OS=Homo sapiens]	0	FALSE	153.641	25	19	52	19	1086	113.8	8.09	168.76	19	0.9	1	0.9	68.2	68	66.1	224.2	219.8	250.9	579191	602546	570829	4.31821e+07	4.30157e+07	4.18477e+07	1.41888e+08	1.39065e+08	1.58763e+08	431823	545042	544985	3.268e+07	2.89056e+07	3.6678e+07	1.00485e+08	8.92101e+07	1.58763e+08	1	1	1	14	12	14	17	16
High	P60660-2	Isoform Smooth muscle of Myosin light polypeptide 6 [OS=Homo sapiens]	0	FALSE	153.555	85	11	130	9	151	17	4.55	425.12	11	70.7	83.4	84.4	114.9	124.1	148.7	88.1	79.2	106.4	2.57885e+08	3.04273e+08	3.07943e+08	4.19005e+08	4.52821e+08	5.42544e+08	3.21432e+08	2.88916e+08	3.87994e+08	1.9227e+08	2.75234e+08	2.94e+08	3.171e+08	3.04286e+08	4.75521e+08	2.27639e+08	1.8534e+08	3.87994e+08	9	9	10	9	9	9	9	8
High	P30419	glycylpeptide N-tetradecanoyltransferase 1 [OS=Homo sapiens]	0	FALSE	153.309	39	13	114	13	496	56.8	7.8	417.39	13	104	98.3	83.6	99	94.5	79	108.5	114.5	118.6	9.11522e+07	8.61527e+07	7.32952e+07	8.68309e+07	8.28981e+07	6.92316e+07	9.51355e+07	1.0041e+08	1.04028e+08	6.79596e+07	7.79307e+07	6.99768e+07	6.5713e+07	55705794	6.06791e+07	6.73752e+07	6.44129e+07	1.04028e+08	12	13	13	13	13	13	13	14
High	P16403	Histone H1.2 [OS=Homo sapiens]	0	FALSE	153.298	38	12	227	1	213	21.4	10.93	771.09	12	86.6	175.3	108.7	112.5	103	92	82	76.7	63.2	1.01997e+06	2.06462e+06	1.28095e+06	1.32562e+06	1.21376e+06	1.08396e+06	966589	903033	744146	760450	1.86758e+06	1.22296e+06	1.00322e+06	815621	950053	684541	579296	744146	1	1	1	1	1	1	1	1
High	Q6DKJ4	nucleoredoxin [OS=Homo sapiens]	0	FALSE	152.518	52	13	90	13	435	48.4	4.97	322.79	13	131.2	109.5	126	97.6	96.1	89.4	81.6	87.8	80.8	5.20913e+07	4.34735e+07	5.00233e+07	3.87691e+07	3.81672e+07	3.5487e+07	3.24183e+07	3.4875e+07	3.20725e+07	3.88373e+07	3.93246e+07	4.77584e+07	2.93402e+07	2.56476e+07	3.11032e+07	2.29587e+07	2.23724e+07	3.20725e+07	14	14	15	13	13	14	12	11
High	P55196-5	Isoform 5 of Afadin [OS=Homo sapiens]	0	FALSE	152.374	16	17	100	17	1834	207.7	6.39	295.69	17	73.6	58.3	58.1	146.4	160.8	135.6	92.3	105.5	69.5	1.71248e+07	1.3577e+07	1.35177e+07	3.40793e+07	3.74358e+07	3.15771e+07	2.14854e+07	2.45609e+07	1.61868e+07	1.27676e+07	1.22813e+07	1.29056e+07	2.5791e+07	2.51561e+07	2.76762e+07	1.5216e+07	1.57558e+07	1.61868e+07	14	15	13	15	16	16	14	15
High	P49903	Selenide, water dikinase 1 [OS=Homo sapiens]	0	FALSE	152.281	60	11	64	11	392	42.9	5.97	222.77	11	83.6	85.3	103.6	80.5	69.6	98.3	101.4	78	199.8	1.96996e+07	2.00932e+07	2.44027e+07	1.89619e+07	1.63857e+07	2.31608e+07	2.38822e+07	1.83679e+07	4.70559e+07	1.46873e+07	1.81756e+07	2.32978e+07	1.43503e+07	1.10108e+07	2.02996e+07	1.69134e+07	1.1783e+07	4.70559e+07	8	8	9	8	6	9	7	5
High	Q16795	NADH dehydrogenase [ubiquinone] 1 alpha subcomplex subunit 9, mitochondrial [OS=Homo sapiens]	0	FALSE	152.268	53	17	136	17	377	42.5	9.8	452.8	17	116.3	108.1	105.4	88.4	91.3	91	87.6	103.8	108.1	1.45402e+08	1.35142e+08	1.31753e+08	1.10456e+08	1.1408e+08	1.13704e+08	1.09541e+08	1.29699e+08	1.35144e+08	1.08406e+08	1.22245e+08	1.25788e+08	8.35925e+07	7.66595e+07	9.96579e+07	7.7577e+07	8.32022e+07	1.35144e+08	18	17	18	19	19	17	18	18
High	Q9H0S4	Probable ATP-dependent RNA helicase DDX47 [OS=Homo sapiens]	0	FALSE	152.025	48	14	65	14	455	50.6	9.1	233.1	14	110.1	120.4	108.5	48.4	57.5	55.2	134.1	141.5	124.3	6.04127e+07	6.60697e+07	5.95456e+07	2.65594e+07	3.15363e+07	3.03147e+07	7.36141e+07	7.76697e+07	6.8196e+07	4.50415e+07	5.97644e+07	5.68496e+07	2.00999e+07	2.11917e+07	2.65698e+07	5.21337e+07	4.98252e+07	6.8196e+07	11	13	12	8	8	11	13	11
High	P53634-1	Dipeptidyl peptidase 1 [OS=Homo sapiens]	0	FALSE	151.862	40	12	86	12	463	51.8	6.99	285.75	12	33.2	33.9	31.6	109.7	115	109.8	170.5	152.7	143.7	2.17606e+07	2.22393e+07	2.07587e+07	7.19654e+07	7.54651e+07	7.20703e+07	1.11909e+08	1.00205e+08	9.42798e+07	1.62239e+07	2.01169e+07	1.98188e+07	5.44629e+07	5.0711e+07	6.31671e+07	7.92542e+07	6.42813e+07	9.42798e+07	9	7	9	11	11	10	12	11
High	P50895	Basal cell adhesion molecule [OS=Homo sapiens]	0	FALSE	151.823	44	17	49	17	628	67.4	5.81	159.4	17	21.9	27.4	41.2	247.7	235.7	225.5	39.3	34.2	27	1.08949e+07	1.36177e+07	2.0454e+07	1.22976e+08	1.17011e+08	1.11931e+08	1.94907e+07	1.69775e+07	1.34169e+07	8.12282e+06	1.23181e+07	1.95279e+07	9.30674e+07	7.8629e+07	9.81036e+07	1.38034e+07	1.08911e+07	1.34169e+07	5	7	11	17	16	18	5	4
High	Q96A49	Synapse-associated protein 1 [OS=Homo sapiens]	0	FALSE	151.592	51	14	70	14	352	39.9	4.53	260.05	14	36.7	47.4	48.6	126.2	115.3	125	152.3	129.1	119.4	2.16965e+07	2.80303e+07	2.874e+07	7.46388e+07	6.81988e+07	7.39308e+07	9.00811e+07	7.63354e+07	7.063e+07	1.61761e+07	2.53552e+07	2.74388e+07	5.64862e+07	4.58281e+07	6.47978e+07	6.37956e+07	4.89692e+07	7.063e+07	11	13	13	13	13	14	14	13
High	P25398	40S ribosomal protein S12 [OS=Homo sapiens]	0	FALSE	151.524	79	12	254	12	132	14.5	7.21	810.78	12	104.3	96.6	103.1	98.8	99.5	96.9	103.3	108.4	89.2	6.43208e+08	5.96032e+08	6.35663e+08	6.09082e+08	6.13406e+08	5.97767e+08	6.36891e+08	6.68769e+08	5.50093e+08	4.79552e+08	5.3915e+08	6.06884e+08	4.60949e+08	4.12196e+08	5.23922e+08	4.51048e+08	4.29016e+08	5.50093e+08	14	13	13	13	13	14	13	13
High	O94832	Unconventional myosin-Id [OS=Homo sapiens]	0	FALSE	151.147	28	20	69	20	1006	116.1	9.39	209.16	20	75.3	65.3	60.3	154.8	169.2	153.1	77.5	71	73.5	3.08666e+07	2.67722e+07	2.4733e+07	6.34776e+07	6.93996e+07	6.27953e+07	3.17824e+07	2.90956e+07	3.01375e+07	2.3013e+07	2.42172e+07	2.36132e+07	4.80394e+07	4.66351e+07	5.50379e+07	2.25083e+07	1.86649e+07	3.01375e+07	17	17	15	17	18	18	15	12
High	P35637-1	RNA-binding protein FUS [OS=Homo sapiens]	0	FALSE	151.098	24	10	131	8	526	53.4	9.36	421.35	10	85.4	122.8	106.7	45.6	39.4	56.5	159.5	128.5	155.8	6.81429e+07	9.7922e+07	8.50889e+07	3.63415e+07	3.14345e+07	4.5051e+07	1.27216e+08	1.02488e+08	1.24251e+08	5.08048e+07	8.85768e+07	8.12365e+07	2.7503e+07	2.11233e+07	3.94857e+07	9.00948e+07	6.5746e+07	1.24251e+08	8	8	8	7	7	8	8	7
High	Q12904-1	aminoacyl tRNA synthase complex-interacting multifunctional protein 1 [OS=Homo sapiens]	0	FALSE	150.921	47	11	106	11	312	34.3	8.43	393.71	11	104	109.1	99.6	119.5	120.7	131.7	79.1	77.8	58.6	9.84698e+07	103341931	9.43476e+07	1.13237e+08	1.14326e+08	1.24758e+08	7.48807e+07	7.36645e+07	5.54833e+07	7.34154e+07	9.34795e+07	9.0076e+07	8.56973e+07	7.68246e+07	1.09346e+08	5.30307e+07	4.72558e+07	5.54833e+07	9	10	10	9	8	9	7	9
High	P25787	Proteasome subunit alpha type-2 [OS=Homo sapiens]	0	FALSE	150.857	57	10	128	10	234	25.9	7.43	526.47	10	89.5	102.9	108.7	89.5	99.7	93.6	127.5	86.5	101.9	1.14439e+08	1.31567e+08	1.38874e+08	1.14425e+08	1.27463e+08	1.19629e+08	1.62997e+08	110503059	130280600	8.53212e+07	1.19011e+08	1.32586e+08	8.6596e+07	8.56528e+07	1.0485e+08	1.15435e+08	7.08878e+07	130280600	8	8	8	8	8	8	8	8
High	P10599-1	thioredoxin [OS=Homo sapiens]	0	TRUE	150.75	80	8	507	8	105	11.7	4.92	1784.57	8	82.1	89.6	87.7	127.7	99.2	139.7	72.1	75.7	126	5.64781e+08	6.1634e+08	6.03345e+08	8.77934e+08	6.82313e+08	9.60708e+08	4.9605e+08	5.20673e+08	8.66694e+08	4.21079e+08	5.5752e+08	5.76028e+08	6.64414e+08	4.585e+08	8.42027e+08	3.51304e+08	3.34012e+08	8.66694e+08	11	10	11	10	11	10	11	10
High	Q10713	Mitochondrial-processing peptidase subunit alpha [OS=Homo sapiens]	0	FALSE	150.342	39	16	150	16	525	58.2	6.92	521.64	16	100.1	90.4	104.5	90.5	85	90.6	103.7	114.6	120.6	9.78478e+07	8.83285e+07	1.02127e+08	8.84547e+07	8.30234e+07	8.84724e+07	1.01275e+08	1.11958e+08	1.17847e+08	7.29517e+07	7.98989e+07	9.75032e+07	6.6942e+07	5.579e+07	7.7543e+07	7.17234e+07	7.18211e+07	1.17847e+08	17	16	17	15	15	16	18	17
High	O00203-1	AP-3 complex subunit beta-1 [OS=Homo sapiens]	0	FALSE	150.279	21	17	97	17	1094	121.2	6.04	309.67	17	128.1	106.2	102.3	91.5	99.1	94.4	91.6	90.5	96.3	7.42713e+07	6.15788e+07	5.93163e+07	5.30751e+07	5.7501e+07	54738447	5.31486e+07	5.24888e+07	5.5844e+07	5.53739e+07	5.5702e+07	5.66307e+07	4.01669e+07	3.86395e+07	4.79763e+07	3.764e+07	3.36716e+07	5.5844e+07	15	16	16	16	16	16	15	15
High	O43681	ATPase ASNA1 [OS=Homo sapiens]	0	FALSE	149.964	59	12	68	12	348	38.8	4.91	226.68	12	124	115.4	127.3	70.6	74.6	68.1	92.1	116.1	111.8	4.26973e+07	3.97681e+07	4.38481e+07	2.43064e+07	2.56936e+07	2.34608e+07	3.17409e+07	3.99925e+07	3.85121e+07	3.18335e+07	3.59729e+07	4.18628e+07	1.83949e+07	1.72656e+07	2.05626e+07	2.2479e+07	2.56552e+07	3.85121e+07	10	10	11	8	9	9	8	9
High	Q9UBE0-1	SUMO-activating enzyme subunit 1 [OS=Homo sapiens]	0	FALSE	149.772	58	14	96	14	346	38.4	5.3	329.34	14	71.2	75	79.8	120.7	120.4	121.5	101.1	100.2	110.3	1.07321e+08	1.13003e+08	1.20274e+08	181888107	1.81437e+08	1.83148e+08	1.52336e+08	1.50996e+08	1.66338e+08	8.00145e+07	1.02219e+08	1.14828e+08	1.37652e+08	1.21922e+08	1.60523e+08	1.07885e+08	9.68641e+07	1.66338e+08	15	15	15	16	15	15	15	14
High	Q86UE4	protein LYRIC [OS=Homo sapiens]	0	FALSE	149.704	47	16	67	16	582	63.8	9.32	214.39	16	134.5	151	142.7	71.1	47.9	81.9	99.7	78.7	92.5	6.0216e+07	6.76036e+07	6.38794e+07	3.18401e+07	2.14472e+07	3.66487e+07	4.46454e+07	3.52499e+07	4.14325e+07	4.48948e+07	6.11518e+07	6.09872e+07	2.40964e+07	1.44121e+07	3.21213e+07	3.1618e+07	2.26128e+07	4.14325e+07	13	13	13	12	10	13	13	12
High	P23193	Transcription elongation factor A protein 1 [OS=Homo sapiens]	0	FALSE	149.597	55	14	92	14	301	33.9	8.38	324.02	14	65	93.3	94.3	88.7	86.3	105.7	120.8	104.8	141.2	6.00409e+07	8.617e+07	8.70501e+07	8.18568e+07	7.97138e+07	9.75516e+07	1.11517e+08	9.67189e+07	1.30361e+08	4.47643e+07	7.79464e+07	8.31089e+07	6.19487e+07	5.3566e+07	8.55006e+07	7.89767e+07	6.20452e+07	1.30361e+08	11	14	12	13	13	15	13	12
High	P08134	Rho-related GTP-binding protein RhoC [OS=Homo sapiens]	0	FALSE	148.765	60	10	163	2	193	22	6.58	579.67	10	74.5	64.3	58.1	186.2	204.5	155.1	59.6	67.4	30.2	1.8002e+07	1.5522e+07	1.40202e+07	4.49641e+07	4.93994e+07	3.74676e+07	14396745	1.62826e+07	7.29847e+06	1.34217e+07	1.40407e+07	1.33854e+07	34028524	3.31954e+07	3.28391e+07	1.01958e+07	1.04453e+07	7.29847e+06	2	2	2	2	2	2	2	2
High	Q15738	sterol-4-alpha-carboxylate 3-dehydrogenase, decarboxylating [OS=Homo sapiens]	0	FALSE	148.75	51	12	67	12	373	41.9	8.06	258.32	12	49	55.9	58.5	174.3	211.5	168.1	70.6	63.7	48.4	2.70437e+07	3.08311e+07	3.22567e+07	9.61354e+07	1.16613e+08	9.26728e+07	3.8913e+07	3.51535e+07	2.66871e+07	2.01628e+07	2.78887e+07	3.07963e+07	7.27546e+07	7.83616e+07	8.12245e+07	2.75583e+07	2.2551e+07	2.66871e+07	11	11	11	12	11	12	10	10
High	Q96LD4	Tripartite motif-containing protein 47 [OS=Homo sapiens]	0	FALSE	148.724	37	12	60	12	638	69.5	6.44	258.66	12	191.4	185.1	153.3	53.8	59	53.3	58.1	73	73.1	2.98491e+07	2.88598e+07	2.38996e+07	8.39259e+06	9.2013e+06	8.3129e+06	9.05501e+06	1.13897e+07	1.13948e+07	2.22544e+07	2.61055e+07	2.28176e+07	6.35146e+06	6.18308e+06	7.28597e+06	6.41278e+06	7.30652e+06	1.13948e+07	10	9	10	9	10	7	9	8
High	P10155-1	60 kDa SS-A/Ro ribonucleoprotein [OS=Homo sapiens]	0	FALSE	148.475	51	19	82	19	538	60.6	8.03	272.61	19	126.5	141.2	124.8	80.4	86.1	82.8	88.7	89.2	80.3	7.95912e+07	8.88787e+07	7.85134e+07	5.06124e+07	5.41797e+07	5.21304e+07	5.58e+07	5.61297e+07	5.05464e+07	5.93402e+07	8.03966e+07	7.49587e+07	3.83031e+07	3.64076e+07	4.56905e+07	3.95177e+07	3.60072e+07	5.05464e+07	16	17	17	12	13	14	14	12
High	O43237	Cytoplasmic dynein 1 light intermediate chain 2 [OS=Homo sapiens]	0	FALSE	148.283	34	9	70	8	492	54.1	6.38	243.8	9	83.7	49.3	63.1	95.3	117.8	58.1	128.1	171.4	133.2	7.36978e+06	4.34594e+06	5.55812e+06	8.39163e+06	1.03761e+07	5.11413e+06	1.12824e+07	1.50978e+07	1.17352e+07	5.49463e+06	3.93119e+06	5.30648e+06	6.35073e+06	6.97253e+06	4.48236e+06	7.9902e+06	9.68527e+06	1.17352e+07	10	9	9	7	10	10	12	9
High	Q9H2P0	Activity-dependent neuroprotector homeobox protein [OS=Homo sapiens]	0	FALSE	148.118	26	19	99	19	1102	123.5	7.34	318.39	19	70.7	85	80.7	106.4	97.2	115	133.9	96.2	115.1	3.27128e+07	3.93064e+07	3.73192e+07	4.92282e+07	4.49523e+07	5.3189e+07	6.19366e+07	4.44938e+07	5.32269e+07	2.43894e+07	3.55552e+07	3.56296e+07	3.72556e+07	3.0207e+07	4.66183e+07	43863640	2.85428e+07	5.32269e+07	16	20	17	16	16	17	16	14
High	P51149	ras-related protein Rab-7a [OS=Homo sapiens]	0	FALSE	148.117	73	14	123	14	207	23.5	6.7	421.11	14	84.5	82.3	86.7	132.6	132.7	129.6	89	81.1	81.5	3.20091e+08	3.11741e+08	328321782	5.02144e+08	5.02396e+08	4.90822e+08	3.37129e+08	3.07341e+08	308624524	2.38648e+08	2.8199e+08	3.13457e+08	3.8002e+08	3.37599e+08	4.30188e+08	2.38756e+08	1.97159e+08	308624524	14	14	15	13	14	14	15	14
High	P31153	S-adenosylmethionine synthase isoform type-2 [OS=Homo sapiens]	0	FALSE	148.024	52	16	144	16	395	43.6	6.48	432.81	16	94	72.2	70.1	92.8	97.1	94.5	137.9	128.5	112.9	2.35784e+08	1.81149e+08	1.75934e+08	2.32633e+08	243658236	2.37033e+08	3.45851e+08	3.22176e+08	2.83136e+08	1.75792e+08	1.63861e+08	1.67969e+08	1.76055e+08	1.63733e+08	2.07751e+08	2.44933e+08	206676177	2.83136e+08	16	16	16	16	16	16	16	15
High	Q8NCW5	NAD(P)H-hydrate epimerase [OS=Homo sapiens]	0	FALSE	147.736	57	11	109	11	288	31.7	7.66	372.48	11	141.4	134.3	116.6	109.9	97.7	88.8	77	72.5	61.7	8.50037e+07	8.07504e+07	7.00968e+07	6.60732e+07	5.87275e+07	5.33836e+07	4.62905e+07	4.35832e+07	3.70798e+07	6.33756e+07	73043959	6.69232e+07	5.00038e+07	3.94637e+07	4.67889e+07	3.2783e+07	2.79586e+07	3.70798e+07	13	12	12	13	11	11	10	11
High	O43491-4	Isoform 4 of Band 4.1-like protein 2 [OS=Homo sapiens]	0	FALSE	147.598	34	19	49	18	852	95.5	5.77	162.83	19	171	168.7	162.9	13.5	11	12.6	129.8	125.3	105.2	4.56855e+07	4.50813e+07	4.35303e+07	3.61529e+06	2.93897e+06	3.35805e+06	3.4679e+07	3.34773e+07	2.8106e+07	3.40614e+07	4.0779e+07	4.15594e+07	2.73603e+06	1.97493e+06	2.94321e+06	2.45598e+07	2.14757e+07	2.8106e+07	15	16	14	6	5	5	14	14
High	Q9ULA0	Aspartyl aminopeptidase [OS=Homo sapiens]	0	FALSE	147.474	58	15	84	15	475	52.4	7.42	282.92	15	92.1	81.3	96.8	150.5	158.4	118.5	60.6	72.3	69.5	4.95194e+07	4.37129e+07	5.20858e+07	8.09744e+07	8.5202e+07	6.37661e+07	3.25962e+07	3.89119e+07	3.73719e+07	3.69198e+07	3.95412e+07	4.97276e+07	6.12809e+07	5.72539e+07	5.58888e+07	2.30847e+07	2.4962e+07	3.73719e+07	18	15	16	16	17	17	12	13
High	Q02809	Procollagen-lysine,2-oxoglutarate 5-dioxygenase 1 [OS=Homo sapiens]	0	FALSE	147.098	42	18	48	18	727	83.5	6.95	169.81	18	221.4	231.6	260	25.3	30	28.4	37.2	36.6	29.5	4.19898e+07	4.39357e+07	4.9317e+07	4.80003e+06	5.68308e+06	5.3822e+06	7.06124e+06	6.94233e+06	5.60334e+06	3.1306e+07	3.97427e+07	4.70842e+07	3.63263e+06	3.81891e+06	4.71731e+06	5.00079e+06	4.45351e+06	5.60334e+06	16	16	17	7	7	9	9	8
High	P68036	Ubiquitin-conjugating enzyme E2 L3 [OS=Homo sapiens]	0	FALSE	146.791	68	9	85	9	154	17.9	8.51	333.95	9	115	111.5	96.1	77.8	88.6	84.5	133	105.3	88.2	1.00976e+08	9.78781e+07	8.44103e+07	6.83104e+07	7.78254e+07	7.4223e+07	1.16804e+08	9.24411e+07	7.74588e+07	7.52839e+07	8.85372e+07	8.05886e+07	5.16968e+07	5.2297e+07	6.50539e+07	8.27208e+07	5.9301e+07	7.74588e+07	9	10	8	9	10	9	8	10
High	P22059	Oxysterol-binding protein 1 [OS=Homo sapiens]	0	FALSE	146.532	32	19	114	18	807	89.4	7.3	356.08	19	55.4	63.8	55.1	127.4	127.7	124.1	115.5	118.6	112.3	5.46404e+07	6.29041e+07	5.42859e+07	1.25584e+08	1.258e+08	1.2232e+08	1.13774e+08	1.1689e+08	110699266	4.07378e+07	5.69009e+07	5.18281e+07	9.50409e+07	8.45349e+07	1.07209e+08	8.05748e+07	7.49852e+07	110699266	17	20	19	18	19	19	18	18
High	P54920	alpha-soluble nsf attachment protein [OS=Homo sapiens]	0	FALSE	146.387	66	13	44	13	295	33.2	5.36	182.74	13	15.8	21.2	19.8	204.4	235.5	228.5	75.1	48.1	51.6	9.76524e+06	1.3131e+07	1.22974e+07	1.26717e+08	145999117	1.41631e+08	4.65448e+07	2.98089e+07	3.19956e+07	7.2806e+06	1.18779e+07	1.17407e+07	9.58989e+07	9.81084e+07	1.24135e+08	3.29632e+07	1.91224e+07	3.19956e+07	6	5	6	11	11	12	8	7
High	Q5TFE4	5'-nucleotidase domain-containing protein 1 [OS=Homo sapiens]	0	FALSE	146.197	60	15	111	15	455	51.8	6.35	397.89	15	108.4	53.4	46.7	109	138	65.2	184.4	175.1	19.9	2.35211e+08	1.15991e+08	1.01468e+08	2.36526e+08	2.99438e+08	1.41421e+08	400274437	3.80035e+08	4.31804e+07	1.75364e+08	1.04921e+08	9.68736e+07	1.79001e+08	2.01216e+08	1.23951e+08	2.83475e+08	2.43792e+08	4.31804e+07	14	15	14	13	15	13	15	15
High	Q6Y7W6-1	GRB10-interacting GYF protein 2 [OS=Homo sapiens]	0	FALSE	146.049	17	13	68	13	1299	150	5.54	230.22	13	82.3	101.5	101.9	86.9	82.9	79.2	140	119.9	105.4	1.89926e+07	2.34091e+07	2.35044e+07	2.00395e+07	1.91306e+07	1.82843e+07	3.22999e+07	2.76693e+07	2.43156e+07	1.41601e+07	2.11751e+07	2.24403e+07	1.51658e+07	1.28553e+07	1.60256e+07	2.28749e+07	1.77499e+07	2.43156e+07	10	12	12	10	9	9	12	9
High	O15031	Plexin-B2 [OS=Homo sapiens]	0	FALSE	146.038	20	22	80	22	1838	205	6.24	234.57	22	94.3	94.1	105.8	155.6	168.7	138.9	52.7	48.1	41.7	4.1284e+07	4.12278e+07	4.63528e+07	6.81391e+07	7.38905e+07	6.08271e+07	2.30981e+07	2.1059e+07	1.82616e+07	3.07798e+07	3.72932e+07	4.42542e+07	5.15672e+07	4.96529e+07	5.33128e+07	1.63581e+07	1.35094e+07	1.82616e+07	20	21	21	20	21	21	16	13
High	Q9NPH2	Inositol-3-phosphate synthase 1 [OS=Homo sapiens]	0	FALSE	145.836	50	14	64	14	558	61	5.76	186.16	14	329.6	275.1	275.9	4.3	4.1	0.9	3.3	3.2	3.5	1.47677e+08	1.23268e+08	1.23606e+08	1.90901e+06	1.85718e+06	418020	1.47482e+06	1.4458e+06	1.56475e+06	1.10102e+08	1.11504e+08	1.18009e+08	1.44472e+06	1.24799e+06	366380	1.04447e+06	927480	1.56475e+06	15	14	14	3	5	1	2	1
High	Q9H2M9	Rab3 GTPase-activating protein non-catalytic subunit [OS=Homo sapiens]	0	FALSE	145.819	20	18	72	18	1393	155.9	5.62	196.57	18	91	80.9	90.2	109.1	111.7	106.9	98.1	114.2	98	3.45027e+07	3.06484e+07	3.41707e+07	4.13297e+07	4.23407e+07	4.05084e+07	37158108	4.32719e+07	3.71374e+07	2.57239e+07	2.77235e+07	3.26236e+07	3.12781e+07	2.84521e+07	3.55042e+07	2.63155e+07	2.7759e+07	3.71374e+07	18	16	17	17	15	15	15	15
[truncated: 5,884 more rows]
[truncated: 12 more columns]
