# Supplementary material for: Characterisation of Colorectal Cancer Cell Lines through Proteomic Profiling of Their Extracellular Vesicles
Source: Proteomes. 2023 Jan 11;11(1):3. doi: 10.3390/proteomes11010003 (PMC9844407; doi:10.3390/proteomes11010003)
Supplement: Supplementary file 1 [file proteomes-11-00003-s001.zip › Table S2.xlsx]

## Sheet: Proteins
Protein FDR Confidence: Combined	Master	Accession	Description	FASTA Title Lines	Exp. q-value: Combined	Contaminant	Sum PEP Score	Coverage [%]	Peptides	# Isoforms	# PSMs	# Unique Peptides	# AAs	MW [kDa]	calc. pI	Score Sequest HT: Sequest HT	# Peptides (by Search Engine): Sequest HT	Biological Process	Cellular Component	Molecular Function	Pfam IDs	Entrez Gene ID	Ensembl Gene ID	Gene Symbol	Chromosome	KEGG Pathways	Reactome Pathways	WikiPathways	# Protein Pathway Groups	Abundance Ratio: (HCT116_R2) / (HCT116_R1)	Abundance Ratio: (HCT116_R3) / (HCT116_R1)	Abundance Ratio: (HT29_R1) / (HCT116_R1)	Abundance Ratio: (HT29_R2) / (HCT116_R1)	Abundance Ratio: (HT29_R3) / (HCT116_R1)	Abundance Ratio: (SW620_R1) / (HCT116_R1)	Abundance Ratio: (SW620_R2) / (HCT116_R1)	Abundance Ratio: (SW620_R3) / (HCT116_R1)	Abundances (Scaled): HCT116_R1	Abundances (Scaled): HCT116_R2	Abundances (Scaled): HCT116_R3	Abundances (Scaled): HT29_R1	Abundances (Scaled): HT29_R2	Abundances (Scaled): HT29_R3	Abundances (Scaled): SW620_R1	Abundances (Scaled): SW620_R2	Abundances (Scaled): SW620_R3	Abundances (Normalized): HCT116_R1	Abundances (Normalized): HCT116_R2	Abundances (Normalized): HCT116_R3
High	Master Protein	ENSEMBL:ENSBTAP00000024146	(Bos taurus) similar to alpha-2-macroglobulin isoform 1	>ENSEMBL:ENSBTAP00000024146 (Bos taurus) similar to alpha-2-macroglobulin isoform 1	0	TRUE	464.778	58	72	101	926	67	1477	164.2	6.02	820.68	72												0	1.588	0.834	0.473	0.279	0.922	0.706	0.473	0.363	132.5	207.6	120.8	60.5	33	118.7	100.9	72	54.1	3.87035e+10	6.06323e+10	3.52835e+10
High	Master Protein	P98160	Basement membrane-specific heparan sulfate proteoglycan core protein [OS=Homo sapiens]	>ProteinCenter:SwissProt|P98160 Basement membrane-specific heparan sulfate proteoglycan core protein [OS=Homo sapiens]	0	FALSE	428.054	24	76	88	516	76	4391	468.5	6.51	519.45	76	cell differentiation;cell growth;cell organization and biogenesis;defense response;metabolic process;regulation of biological process;response to stimulus;transport	extracellular;membrane;organelle lumen	metal ion binding;protein binding	Pf00008, Pf00047, Pf00052, Pf00053, Pf00054, Pf00057, Pf02210, Pf07679, Pf07686, Pf12785, Pf13385, Pf13895, Pf13927	3339	ENSG00000142798.17	HSPG2	1	Hepatitis B; Proteoglycans in cancer; ECM-receptor interaction	Integrin cell surface interactions; Defective B4GALT7 causes EDS, progeroid type; Amyloid fiber formation; Retinoid metabolism and transport; Defective EXT2 causes exostoses 2; Non-integrin membrane-ECM interactions; Defective EXT1 causes exostoses 1, TRPS2 and CHDS; Signaling by GPCR; HS-GAG biosynthesis; A tetrasaccharide linker sequence is required for GAG synthesis; Laminin interactions; Degr…		32	0.856	0.885	0.22	0.316	0.295	0.149	0.225	0.425	196.4	176.2	207.8	38.9	58.9	50.8	32.8	42.1	96.1	6.4452e+09	5.78344e+09	6.82024e+09
High	Master Protein	P21333	Filamin-A [OS=Homo sapiens]	>ProteinCenter:SwissProt|P21333 Filamin-A [OS=Homo sapiens]	0	FALSE	392.641	41	86	96	406	79	2647	280.6	6.06	413.1	86	cell organization and biogenesis;cellular component movement;metabolic process;regulation of biological process;response to stimulus;transport	cytoplasm;cytoskeleton;cytosol;extracellular;membrane;nucleus	protein binding;RNA binding;signal transducer activity	Pf00307, Pf00630	2316	ENSG00000196924.14	FLNA	X	Salmonella infection; Focal adhesion; Proteoglycans in cancer; MAPK signaling pathway	Platelet degranulation ; RHO GTPases activate PAKs; Cell-extracellular matrix interactions; GP1b-IX-V activation signalling	Androgen receptor signaling pathway; Prolactin Signaling Pathway; Focal Adhesion; Hypothesized Pathways in Pathogenesis of Cardiovascular Disease; MAPK Signaling Pathway; IL-4 Signaling Pathway	22	1.044	0.883	1.018	1.57	1.24	1.003	1.251	1.28	86.8	101.8	105.6	81.6	111.4	91.3	94.8	104.5	122.1	1.57134e+09	1.84267e+09	1.91032e+09
High	Master Protein	Q14204	Cytoplasmic dynein 1 heavy chain 1 [OS=Homo sapiens]	>ProteinCenter:SwissProt|Q14204 Cytoplasmic dynein 1 heavy chain 1 [OS=Homo sapiens]	0	FALSE	362.603	24	104	108	360	104	4646	532.1	6.4	349.78	104	cell division;cell organization and biogenesis;cellular component movement;regulation of biological process;transport	cytoplasm;cytoskeleton;cytosol;extracellular;membrane;organelle lumen	catalytic activity;motor activity;nucleotide binding;protein binding;RNA binding	Pf00769, Pf03028, Pf03915, Pf04156, Pf07246, Pf07728, Pf08385, Pf08393, Pf12774, Pf12775, Pf12777, Pf12780, Pf12781, Pf13173, Pf13207, Pf13401	1778	ENSG00000197102.10	DYNC1H1	14	Phagosome; Salmonella infection; Vasopressin-regulated water reabsorption	COPI-independent Golgi-to-ER retrograde traffic; Regulation of PLK1 Activity at G2/M Transition; AURKA Activation by TPX2; Anchoring of the basal body to the plasma membrane; Recruitment of NuMA to mitotic centrosomes; Recruitment of mitotic centrosome proteins and complexes; Loss of Nlp from mitotic centrosomes; Amplification of signal from unattached kinetochores via a MAD2 inhibitory signal; N…		50	0.887	0.834	0.67	0.523	0.833	0.914	0.806	0.745	123.1	96.6	129.5	75.6	59.4	93.3	124.6	97.2	100.8	1.66997e+09	1.31024e+09	1.75624e+09
High	Master Protein	Q9Y490	Talin-1 [OS=Homo sapiens]	>ProteinCenter:SwissProt|Q9Y490 Talin-1 [OS=Homo sapiens]	0	FALSE	312.44	35	73	80	344	73	2541	269.6	6.07	324.04	73	cell organization and biogenesis;cellular component movement;regulation of biological process;response to stimulus;transport	cell surface;cytoplasm;cytoskeleton;cytosol;extracellular;membrane	protein binding;structural molecule activity	Pf00373, Pf01608, Pf02174, Pf08913, Pf09141, Pf09379	7094	ENSG00000137076.20	TLN1	9	HTLV-I infection; Platelet activation; Focal adhesion; Rap1 signaling pathway	SEMA3A-Plexin repulsion signaling by inhibiting Integrin adhesion; Signaling by BRAF and RAF fusions; MAP2K and MAPK activation; Smooth Muscle Contraction; XBP1(S) activates chaperone genes; GRB2:SOS provides linkage to MAPK signaling for Integrins ; Signaling by RAS mutants; Signaling by high-kinase activity BRAF mutants; Signaling by moderate kinase activity BRAF mutants; p130Cas linkage to MAP…	Integrin-mediated Cell Adhesion; Primary Focal Segmental Glomerulosclerosis FSGS; Focal Adhesion	43	1.091	1.216	0.499	0.439	0.758	1.006	0.618	0.792	116.3	131.6	166.2	56.5	45.9	79.6	125	85.6	93.3	2.58904e+09	2.92978e+09	3.70018e+09
High	Master Protein	P35579-1	Myosin-9 [OS=Homo sapiens]	>ProteinCenter:SwissProt|P35579-1 Myosin-9 [OS=Homo sapiens]	0	FALSE	307.868	31	67	74	288	59	1960	226.4	5.6	332.3	67	cell differentiation;cell organization and biogenesis;cellular component movement;metabolic process;regulation of biological process;response to stimulus;transport	cytoplasm;cytoskeleton;cytosol;extracellular;membrane;nucleus	catalytic activity;motor activity;nucleotide binding;protein binding;RNA binding;transporter activity	Pf00063, Pf01442, Pf01496, Pf01576, Pf01765, Pf02736, Pf03962, Pf04111, Pf04156, Pf05911, Pf06637, Pf07888, Pf09731, Pf11068, Pf11559, Pf12128, Pf13094	4627	ENSG00000100345.20	MYH9	22	Salmonella infection; Regulation of actin cytoskeleton; Tight junction	RHO GTPases activate PAKs; EPHA-mediated growth cone collapse; RHO GTPases Activate ROCKs; Sema4D induced cell migration and growth-cone collapse; Regulation of actin dynamics for phagocytic cup formation; RHO GTPases activate CIT; RHO GTPases activate PKNs	Primary Focal Segmental Glomerulosclerosis FSGS; VEGFA-VEGFR2 Signaling Pathway	23	0.824	0.93	1.035	1.055	1.562	1.603	1.348	2.254	87.6	77.4	88.5	80.1	70.2	85.8	130.9	90	189.5	1.5276e+09	1.35031e+09	1.54323e+09
High	Master Protein	Q09666-1	Neuroblast differentiation-associated protein AHNAK [OS=Homo sapiens]	>ProteinCenter:SwissProt|Q09666-1 Neuroblast differentiation-associated protein AHNAK [OS=Homo sapiens]	0	FALSE	306.498	32	95	96	180	95	5890	628.7	6.15	200.06	95	cell organization and biogenesis;regulation of biological process	cytoplasm;cytoskeleton;cytosol;membrane;nucleus	protein binding;RNA binding;structural molecule activity		79026	ENSG00000124942.13	AHNAK	11				0	0.732	0.766	7.202	11.116	6.365	0.705	1.309	1.148	29.7	22.8	26.6	170.6	340.2	196.1	32.7	37.4	43.9	1.52928e+08	1.17498e+08	1.37237e+08
High	Master Protein	Q2UVX4	SWISS-PROT:Q2UVX4 (Bos taurus) Complement C3 precursor	>Q2UVX4 SWISS-PROT:Q2UVX4 (Bos taurus) Complement C3 precursor	0	TRUE	301.929	42	69	84	347	69	1662	187.2	6.84	337.15	69												0	0.943	0.952	0.587	0.373	0.779	0.724	0.572	0.746	133.2	134.6	133.4	77.8	46.1	100.6	104.2	66.7	103.5	3.58457e+09	3.62223e+09	3.59141e+09
High	Master Protein	Q15149-1	plectin [OS=Homo sapiens]	>ProteinCenter:SwissProt|Q15149-1 plectin [OS=Homo sapiens]	0	FALSE	296.852	21	89	89	197	86	4684	531.5	5.96	233.96	89	cell organization and biogenesis	cytoplasm;cytoskeleton;cytosol;membrane	protein binding;RNA binding;structural molecule activity	Pf00307, Pf00681, Pf03501, Pf07812	5339	ENSG00000178209.14	PLEC	8		Assembly of collagen fibrils and other multimeric structures; Caspase-mediated cleavage of cytoskeletal proteins; Type I hemidesmosome assembly		11	0.699	0.804	6.088	5.786	3.039	1.725	3.339	4.342	26.8	17.3	27.5	209.9	192.7	88.1	71.5	121.8	144.4	7.68593e+07	4.96735e+07	7.88259e+07
High	Master Protein	P01030	SWISS-PROT:P01030 (Bos taurus) similar to Complement C4-A precursor	>P01030 SWISS-PROT:P01030 (Bos taurus) similar to Complement C4-A precursor	0	TRUE	283.99	38	58	64	386	15	1741	192.7	7.43	397.89	58												0	1.044	0.916	1.186	1.587	1.428	2.043	1.982	2.086	73.9	72.6	74.7	68.9	79.8	66.5	155.5	140.3	167.8	4.4368e+08	4.35733e+08	4.48054e+08
High	Master Protein	ENSEMBL:ENSBTAP00000007350	(Bos taurus) similar to Complement C4-A precursor	>ENSEMBL:ENSBTAP00000007350 (Bos taurus) similar to Complement C4-A precursor	0	TRUE	266.309	36	55	60	376	12	1742	192.9	7.44	378.76	55												0	0.945	0.992	0.71	0.667	0.778	1.058	1.044	1.197	104.9	109.6	108.1	74.6	68	87.8	117.4	103.3	126.3	4.73092e+08	4.93851e+08	4.87175e+08
High	Master Protein	O75369-1	Filamin-B [OS=Homo sapiens]	>ProteinCenter:SwissProt|O75369-1 Filamin-B [OS=Homo sapiens]	0	FALSE	253.472	33	67	69	195	59	2602	278	5.73	204.39	67	cell differentiation;cell organization and biogenesis;development;regulation of biological process;response to stimulus	cytoplasm;cytoskeleton;cytosol;membrane;nucleus	protein binding;RNA binding	Pf00307, Pf00630	2317	ENSG00000136068.14	FLNB	3	Focal adhesion; Salmonella infection; Proteoglycans in cancer; MAPK signaling pathway	ISG15 antiviral mechanism	VEGFA-VEGFR2 Signaling Pathway	10	0.72	0.856	8.859	11.309	6.519	1.986	3.29	4.331	25.1	16.7	20.9	191.4	268.7	145.1	45.9	88.6	97.5	1.19442e+08	7.97115e+07	9.9691e+07
High	Master Protein	P11142-1	Heat shock cognate 71 kDa protein [OS=Homo sapiens]	>ProteinCenter:SwissProt|P11142-1 Heat shock cognate 71 kDa protein [OS=Homo sapiens]	0	FALSE	246.655	56	36	52	276	23	646	70.9	5.52	293.8	36	cell communication;cell organization and biogenesis;metabolic process;regulation of biological process;response to stimulus;transport	cytoplasm;cytosol;endosome;extracellular;membrane;nucleus;organelle lumen;spliceosomal complex	catalytic activity;nucleotide binding;protein binding;RNA binding	Pf00012, Pf02463, Pf06723	3312	ENSG00000109971.13	HSPA8	11	Toxoplasmosis; Spliceosome; Endocytosis; Antigen processing and presentation; Influenza A; Protein processing in endoplasmic reticulum; Epstein-Barr virus infection; Estrogen signaling pathway; Legionellosis; Measles; MAPK signaling pathway; Longevity regulating pathway - multiple species	Protein methylation; Clathrin-mediated endocytosis; Regulation of HSF1-mediated heat shock response; Golgi Associated Vesicle Biogenesis; GABA synthesis, release, reuptake and degradation; Lysosome Vesicle Biogenesis; CHL1 interactions; AUF1 (hnRNP D0) binds and destabilizes mRNA; Attenuation phase; Neutrophil degranulation; mRNA Splicing - Major Pathway; Interleukin-4 and 13 signaling; HSP90 cha…	Parkin-Ubiquitin Proteasomal System pathway; MAPK Signaling Pathway; Exercise-induced Circadian Regulation	52	0.838	1.065	1.148	1.78	1.326	1.138	1.177	1.271	90.9	80.5	99.2	105.9	117.6	89.8	101.7	89.8	124.6	2.07504e+09	1.83649e+09	2.26481e+09
High	Master Protein	Q28107	SWISS-PROT:Q28107 (Bos taurus) Coagulation factor V precursor	>Q28107 SWISS-PROT:Q28107 (Bos taurus) Coagulation factor V precursor	0	TRUE	246.399	21	49	65	319	37	2211	248.8	5.83	304.2	49	coagulation;metabolic process	extracellular	catalytic activity;metal ion binding	Pf00754, Pf03154, Pf03157, Pf05109, Pf05539, Pf07731, Pf07732, Pf15268	280687		F5	16	Complement and coagulation cascades			1	1.069	0.964	0.834	1.323	1.162	0.913	1.491	1.09	98.9	106.5	100.1	67.1	92.1	94	97.4	139.8	104	3.07217e+09	3.30876e+09	3.10821e+09
High	Master Protein	P49327	Fatty acid synthase [OS=Homo sapiens]	>ProteinCenter:SwissProt|P49327 Fatty acid synthase [OS=Homo sapiens]	0	FALSE	227.563	30	59	62	207	58	2511	273.3	6.44	202.84	59	cell differentiation;metabolic process;regulation of biological process;response to stimulus	cytoplasm;cytosol;Golgi;membrane;mitochondrion	catalytic activity;nucleotide binding;protein binding;RNA binding	Pf00106, Pf00107, Pf00108, Pf00109, Pf00698, Pf00975, Pf02801, Pf08242, Pf08659, Pf13602, Pf14765	2194	ENSG00000169710.8	FASN	17	Metabolic pathways; Fatty acid biosynthesis; Fatty acid metabolism; AMPK signaling pathway; Insulin signaling pathway	ChREBP activates metabolic gene expression; Fatty acyl-CoA biosynthesis; Vitamin B5 (pantothenate) metabolism; Activation of gene expression by SREBF (SREBP)	AMP-activated Protein Kinase (AMPK) Signaling; Sterol Regulatory Element-Binding Proteins (SREBP) signalling; SREBF and miR33 in cholesterol and lipid homeostasis; Liver X Receptor Pathway; Fatty Acid Biosynthesis; Angiopoietin Like Protein 8 Regulatory Pathway	23	0.69	0.724	1.565	1.445	0.907	0.632	0.892	0.855	107.1	80.5	90.5	137.7	133.5	88.4	76.3	88.6	97.6	7.01016e+08	5.26687e+08	5.92118e+08
High	Master Protein	P63261	Actin, cytoplasmic 2 [OS=Homo sapiens]	>ProteinCenter:SwissProt|P63261 Actin, cytoplasmic 2 [OS=Homo sapiens]	0	FALSE	215.996	75	29	47	514	1	375	41.8	5.48	599.75	29	cell organization and biogenesis;cellular component movement;regulation of biological process;response to stimulus	cytoplasm;cytoskeleton;cytosol;membrane;nucleus	nucleotide binding;protein binding;structural molecule activity	Pf00022	71	ENSG00000184009.9	ACTG1	17	Tight junction; Vibrio cholerae infection; Salmonella infection; Phagosome; Dilated cardiomyopathy; Influenza A; Leukocyte transendothelial migration; Focal adhesion; Oxytocin signaling pathway; Shigellosis; Adherens junction; Hippo signaling pathway; Hypertrophic cardiomyopathy (HCM); Proteoglycans in cancer; Pathogenic Escherichia coli infection; Viral myocarditis; Apoptosis; Arrhythmogenic rig…	Signaling by BRAF and RAF fusions; Formation of annular gap junctions; Cell-extracellular matrix interactions; MAP2K and MAPK activation; Clathrin-mediated endocytosis; Interaction between L1 and Ankyrins; VEGFA-VEGFR2 Pathway; RHO GTPases activate IQGAPs; Signaling by RAS mutants; Recycling pathway of L1; Signaling by high-kinase activity BRAF mutants; Signaling by moderate kinase activity BRAF …	Arrhythmogenic Right Ventricular Cardiomyopathy; Pathogenic Escherichia coli infection; Common Pathways Underlying Drug Addiction; Myometrial Relaxation and Contraction Pathways; Focal Adhesion; Fas Ligand (FasL) pathway and Stress induction of Heat Shock Proteins (HSP) regulation; Striated Muscle Contraction; Regulation of Actin Cytoskeleton	80	1.049	0.848	1.098	8.894	3.75	1.558	6.309	3.543	38.6	32.5	20.4	43.9	326.8	145.9	45.1	154.9	92	8.77086e+06	7.38437e+06	4.63546e+06
High	Master Protein	ENSEMBL:ENSBTAP00000025008	(Bos taurus) hypothetical protein	>ENSEMBL:ENSBTAP00000025008 (Bos taurus) hypothetical protein	0	TRUE	214.743	49	25	50	363	14	536	59.3	5.15	305.19	25												0	1.006	1.041	0.423	0.379	0.756	0.978	0.695	0.659	131	134	141.2	59.1	48.8	91.3	131.3	79.2	84.2	6.77086e+09	6.92634e+09	7.30003e+09
High	Master Protein	P60709	Actin, cytoplasmic 1 [OS=Homo sapiens]	>ProteinCenter:SwissProt|P60709 Actin, cytoplasmic 1 [OS=Homo sapiens]	0	FALSE	212.089	75	29	48	506	1	375	41.7	5.48	586.33	29	cell organization and biogenesis;cellular component movement;metabolic process;regulation of biological process;response to stimulus	cytoplasm;cytoskeleton;cytosol;membrane;nucleus	DNA binding;nucleotide binding;protein binding;structural molecule activity	Pf00022	60	ENSG00000075624.13	ACTB	7	Dilated cardiomyopathy; Regulation of actin cytoskeleton; Proteoglycans in cancer; Hypertrophic cardiomyopathy (HCM); Arrhythmogenic right ventricular cardiomyopathy (ARVC); Phagosome; Vibrio cholerae infection; Rap1 signaling pathway; Leukocyte transendothelial migration; Pathogenic Escherichia coli infection; Salmonella infection; Shigellosis; Apoptosis; Influenza A; Oxytocin signaling pathway;…	Formation of annular gap junctions; Cell-extracellular matrix interactions; UCH proteinases; MAP2K and MAPK activation; Interaction between L1 and Ankyrins; Factors involved in megakaryocyte development and platelet production; Translocation of GLUT4 to the plasma membrane; EPH-ephrin mediated repulsion of cells; Prefoldin mediated transfer of substrate to CCT/TriC; EPHB-mediated forward signalin…	Arrhythmogenic Right Ventricular Cardiomyopathy; Pathogenic Escherichia coli infection; Common Pathways Underlying Drug Addiction; Myometrial Relaxation and Contraction Pathways; Focal Adhesion; Fas Ligand (FasL) pathway and Stress induction of Heat Shock Proteins (HSP) regulation; Regulation of Actin Cytoskeleton	102	1.098	1.054	2.869	24.349	9.433	5.659	16.926	7.971	21.1	18.6	15.5	59.6	423.3	197.9	17.9	39.1	107.1	4.28293e+06	3.77416e+06	3.1436e+06
High	Master Protein	O43707	Alpha-actinin-4 [OS=Homo sapiens]	>ProteinCenter:SwissProt|O43707 Alpha-actinin-4 [OS=Homo sapiens]	0	FALSE	209.644	48	44	48	191	28	911	104.8	5.44	205.88	44	cell organization and biogenesis;cellular component movement;regulation of biological process;response to stimulus;transport	cytoplasm;cytoskeleton;cytosol;extracellular;nucleus;organelle lumen	DNA binding;metal ion binding;protein binding;RNA binding	Pf00307, Pf00435, Pf08726, Pf11971, Pf13499	81	ENSG00000282844.1; ENSG00000130402.11	ACTN4	19; CHR_HG26_PATCH	Viral carcinogenesis; Systemic lupus erythematosus; Adherens junction; Arrhythmogenic right ventricular cardiomyopathy (ARVC); Regulation of actin cytoskeleton; Tight junction; Leukocyte transendothelial migration; Focal adhesion; Amoebiasis	Platelet degranulation ; Nephrin family interactions	Arrhythmogenic Right Ventricular Cardiomyopathy; Primary Focal Segmental Glomerulosclerosis FSGS; Striated Muscle Contraction	18	0.613	0.538	6.026	8.744	6.104	1.991	3.316	3.686	25.9	16	15.7	168.6	260.7	138.8	49.3	131.1	93.8	2.71228e+08	1.66959e+08	1.64407e+08
High	Master Protein	Q8WUM4	Programmed cell death 6-interacting protein [OS=Homo sapiens]	>ProteinCenter:SwissProt|Q8WUM4 Programmed cell death 6-interacting protein [OS=Homo sapiens]	0	FALSE	199.25	57	51	53	241	51	868	96	6.52	239.92	51	cell death;cell division;cell organization and biogenesis;regulation of biological process;transport	cytoplasm;cytoskeleton;cytosol;extracellular;membrane	protein binding	Pf03097, Pf08391, Pf13949	10015	ENSG00000170248.13	PDCD6IP	3	Endocytosis	Budding and maturation of HIV virion; Uptake and function of anthrax toxins		9	0.917	0.924	0.845	0.903	1.299	1.895	1.645	0.932	83.6	78.1	93.8	69.6	74.6	102.3	172.8	136	89	2.3645e+09	2.20886e+09	2.65317e+09
High	Master Protein	P26038	Moesin [OS=Homo sapiens]	>ProteinCenter:SwissProt|P26038 Moesin [OS=Homo sapiens]	0	FALSE	191.221	45	39	45	233	25	577	67.8	6.4	282.96	39	cell differentiation;cell organization and biogenesis;cell proliferation;cellular component movement;regulation of biological process;response to stimulus	cell surface;cytoplasm;cytoskeleton;cytosol;membrane;nucleus	protein binding;RNA binding;structural molecule activity	Pf00373, Pf00769, Pf09379, Pf09380	4478	ENSG00000147065.16	MSN	X	Regulation of actin cytoskeleton; Measles; Proteoglycans in cancer; Leukocyte transendothelial migration	Gene and protein expression by JAK-STAT signaling after Interleukin-12 stimulation; Interleukin-12 family signaling; Recycling pathway of L1	Glial Cell Differentiation; AGE/RAGE pathway; Regulation of Actin Cytoskeleton	16	0.706	0.663	2.669	4.501	2.58	2.374	2.915	3.057	40.2	27.6	29.1	111.6	208.7	134.5	85.8	136.4	126	3.79206e+08	2.60009e+08	2.74734e+08
High	Master Protein	P16144-2	Isoform Beta-4A of Integrin beta-4 [OS=Homo sapiens]	>ProteinCenter:SwissProt|P16144-2 Isoform Beta-4A of Integrin beta-4 [OS=Homo sapiens]	0	FALSE	185.526	27	40	45	231	40	1752	194.9	6.1	245.57	40	cell communication;cell differentiation;cell organization and biogenesis;cellular component movement;metabolic process;regulation of biological process;response to stimulus	cell surface;membrane;nucleus	protein binding;receptor activity	Pf00041, Pf00362, Pf03160, Pf07965, Pf07974	3691	ENSG00000132470.13	ITGB4	17			Integrin-mediated Cell Adhesion; Arrhythmogenic Right Ventricular Cardiomyopathy; Alpha 6 Beta 4 signaling pathway; Primary Focal Segmental Glomerulosclerosis FSGS; Focal Adhesion; TGF-beta Signaling Pathway; Regulation of Apoptosis by Parathyroid Hormone-related Protein; Focal Adhesion-PI3K-Akt-mTOR-signaling pathway	8	0.84	0.928	1.859	2.534	2.322	1.615	1.393	1.477	62.1	58.1	73.5	114.3	146.6	135	113.8	89.1	107.6	6.4627e+08	6.04289e+08	7.6475e+08
High	Master Protein	P05023	Sodium/potassium-transporting ATPase subunit alpha-1 [OS=Homo sapiens]	>ProteinCenter:SwissProt|P05023 Sodium/potassium-transporting ATPase subunit alpha-1 [OS=Homo sapiens]	0	FALSE	177.637	33	34	38	209	34	1023	112.8	5.49	235.53	34	cell communication;cellular homeostasis;metabolic process;regulation of biological process;response to stimulus;transport	endoplasmic reticulum;endosome;Golgi;membrane	catalytic activity;metal ion binding;nucleotide binding;protein binding;transporter activity	Pf00122, Pf00689, Pf00690, Pf00702, Pf08282, Pf12710, Pf13246	476	ENSG00000163399.15	ATP1A1	1	Insulin secretion; cGMP-PKG signaling pathway; Salivary secretion; Thyroid hormone synthesis; Proximal tubule bicarbonate reclamation; cAMP signaling pathway; Carbohydrate digestion and absorption; Endocrine and other factor-regulated calcium reabsorption; Pancreatic secretion; Bile secretion; Mineral absorption; Adrenergic signaling in cardiomyocytes; Cardiac muscle contraction; Thyroid hormone …	Ion homeostasis; Ion transport by P-type ATPases	Preimplantation Embryo	24	0.696	0.742	1.981	3.248	1.835	1.119	1.836	1.475	68.4	50.1	57	131.6	193.8	112.9	78.6	105.4	102.3	1.13162e+09	8.28379e+08	9.41676e+08
High	Master Protein	P46940	Ras GTPase-activating-like protein IQGAP1 [OS=Homo sapiens]	>ProteinCenter:SwissProt|P46940 Ras GTPase-activating-like protein IQGAP1 [OS=Homo sapiens]	0	FALSE	175.293	30	45	47	137	40	1657	189.1	6.48	130.42	45	cell growth;regulation of biological process;response to stimulus;transport	cytoplasm;cytoskeleton;cytosol;membrane;nucleus	enzyme regulator activity;metal ion binding;protein binding	Pf00307, Pf00397, Pf00616, Pf03836, Pf11016	8826	ENSG00000140575.12	IQGAP1	15	Adherens junction; Proteoglycans in cancer; Regulation of actin cytoskeleton	Signaling by BRAF and RAF fusions; MAP2K and MAPK activation; RHO GTPases activate IQGAPs; Glucagon-like Peptide-1 (GLP1) regulates insulin secretion; Signaling by RAS mutants; Signaling by high-kinase activity BRAF mutants; Signaling by moderate kinase activity BRAF mutants; Nephrin family interactions; Paradoxical activation of RAF signaling by kinase inactive BRAF; Neutrophil degranulation; In…	VEGFA-VEGFR2 Signaling Pathway; EGF/EGFR Signaling Pathway; Regulation of Actin Cytoskeleton; G13 Signaling Pathway	35	0.667	0.555	4.036	7.296	4.215	0.801	1.301	1.39	47.8	33.2	35	172.3	264.3	161.2	44.4	62.1	79.5	3.40173e+08	2.36456e+08	2.49283e+08
High	Master Protein	P68371	Tubulin beta-4B chain [OS=Homo sapiens]	>ProteinCenter:SwissProt|P68371 Tubulin beta-4B chain [OS=Homo sapiens]	0	FALSE	168.738	53	25	46	252	2	445	49.8	4.89	211.6	25	cell organization and biogenesis;cellular component movement;defense response;regulation of biological process;response to stimulus;transport	cytoplasm;cytoskeleton;cytosol;extracellular;nucleus;organelle lumen	catalytic activity;nucleotide binding;protein binding;RNA binding;structural molecule activity	Pf00091, Pf03953, Pf10644	10383	ENSG00000188229.5	TUBB4B	9	Gap junction; Phagosome; Pathogenic Escherichia coli infection	COPI-independent Golgi-to-ER retrograde traffic; COPI-dependent Golgi-to-ER retrograde traffic; Carboxyterminal post-translational modifications of tubulin; Regulation of PLK1 Activity at G2/M Transition; Recruitment of NuMA to mitotic centrosomes; Hedgehog 'off' state; Loss of Nlp from mitotic centrosomes; Translocation of GLUT4 to the plasma membrane; Prefoldin mediated transfer of substrate to…	Pathogenic Escherichia coli infection; Parkin-Ubiquitin Proteasomal System pathway	74	1.872	3.186	1.077	0.918	0.836	2.003	0.924	2.29	94.4	104.2	136.7	97.3	82.9	75.5	106.4	83.4	119.3	1.80503e+08	1.99237e+08	2.61341e+08
High	Master Protein	Q9P265	Disco-interacting protein 2 homolog B [OS=Homo sapiens]	>ProteinCenter:SwissProt|Q9P265 Disco-interacting protein 2 homolog B [OS=Homo sapiens]	0	FALSE	168.452	30	43	49	182	41	1576	171.4	8.09	187	43	metabolic process	cytoplasm;membrane;nucleus	catalytic activity	Pf00501, Pf06464	57609	ENSG00000066084.12	DIP2B	12				0	0.737	0.743	1.258	1.564	1.715	4.804	4.124	2.476	45	33.9	36	51.2	61.1	71.4	238.5	240.9	121.9	3.04955e+08	2.29672e+08	2.43849e+08
High	Master Protein	O00159-1	Unconventional myosin-Ic [OS=Homo sapiens]	>ProteinCenter:SwissProt|O00159-1 Unconventional myosin-Ic [OS=Homo sapiens]	0	FALSE	167.236	47	43	46	163	2	1063	121.6	9.41	164.35	43	cell organization and biogenesis;regulation of biological process;response to stimulus;transport	cytoplasm;cytosol;membrane;nucleus	catalytic activity;motor activity;nucleotide binding;protein binding	Pf00063, Pf06017	4641	ENSG00000197879.14	MYO1C	17		Translocation of GLUT4 to the plasma membrane; Regulation of actin dynamics for phagocytic cup formation	Insulin Signaling	8			100	100	100							304.8	341.6	253.6
High	Master Protein	O14578-4	Isoform 4 of Citron Rho-interacting kinase [OS=Homo sapiens]	>ProteinCenter:SwissProt|O14578-4 Isoform 4 of Citron Rho-interacting kinase [OS=Homo sapiens]	0	FALSE	166.364	25	51	53	120	51	2069	236.5	6.67	129.46	51	cell death;cell differentiation;cell organization and biogenesis;metabolic process;regulation of biological process;response to stimulus;transport	cytosol;Golgi;membrane	catalytic activity;metal ion binding;motor activity;nucleotide binding;protein binding;structural molecule activity;transporter activity	Pf00038, Pf00069, Pf00130, Pf00169, Pf00261, Pf00433, Pf00780, Pf00836, Pf01496, Pf01576, Pf01636, Pf02463, Pf03962, Pf04111, Pf04156, Pf05557, Pf05622, Pf05667, Pf07714, Pf07888, Pf07926, Pf08614, Pf09728, Pf09730, Pf09731, Pf10174, Pf12128, Pf13166, Pf13514, Pf14531	11113	ENSG00000122966.15	CIT	12			G13 Signaling Pathway	1	0.711	0.952	5.041	4.54	2.791	9.129	14.218	31.31	37	35.4	41.1	65.3	58.7	43.1	112.1	178.5	328.8	1.61674e+08	1.54623e+08	1.79716e+08
High	Master Protein	Q00610-1	Clathrin heavy chain 1 [OS=Homo sapiens]	>ProteinCenter:SwissProt|Q00610-1 Clathrin heavy chain 1 [OS=Homo sapiens]	0	FALSE	163.348	26	41	42	187	41	1675	191.5	5.69	177.5	41	cell differentiation;cell division;cell organization and biogenesis;cellular component movement;metabolic process;regulation of biological process;response to stimulus;transport	cytoplasm;cytoskeleton;cytosol;endosome;membrane;vacuole	protein binding;RNA binding;structural molecule activity	Pf00637, Pf01394, Pf04053, Pf09268, Pf13838	1213	ENSG00000141367.11	CLTC	17	Lysosome; Endocrine and other factor-regulated calcium reabsorption; Synaptic vesicle cycle; Endocytosis; Bacterial invasion of epithelial cells; Huntington's disease	Cargo recognition for clathrin-mediated endocytosis; Formation of annular gap junctions; Golgi Associated Vesicle Biogenesis; Recycling pathway of L1; LDL clearance; Lysosome Vesicle Biogenesis; EPH-ephrin mediated repulsion of cells; Entry of Influenza Virion into Host Cell via Endocytosis; Retrograde neurotrophin signalling; VLDLR internalisation and degradation; WNT5A-dependent internalization…	Synaptic Vesicle Pathway; VEGFA-VEGFR2 Signaling Pathway; Complement and Coagulation Cascades	50	0.669	0.612	0.471	0.522	0.493	0.364	0.39	0.341	183.3	132.8	142.6	82.1	84.5	72.6	71.6	66.4	64.1	1.4276e+09	1.03399e+09	1.11079e+09
High	Master Protein	O00159-3	Isoform 3 of Unconventional myosin-Ic [OS=Homo sapiens]	>ProteinCenter:SwissProt|O00159-3 Isoform 3 of Unconventional myosin-Ic [OS=Homo sapiens]	0	FALSE	163.267	47	42	45	159	1	1044	119.6	9.45	157.69	42	cell organization and biogenesis;regulation of biological process;response to stimulus;transport	cytoplasm;cytosol;membrane	catalytic activity;motor activity;nucleotide binding;protein binding	Pf00063, Pf06017	4641	ENSG00000197879.14	MYO1C	17		B-WICH complex positively regulates rRNA expression	Insulin Signaling	5	1.159	1.836	0.01	0.435	0.01	1.275	1.766	1.521	100.1	116	183.8		43.6		127.6	176.8	152.2	5.41193e+06	6.26983e+06	9.93634e+06
High	Master Protein	P07437	tubulin beta chain [OS=Homo sapiens]	>ProteinCenter:SwissProt|P07437 tubulin beta chain [OS=Homo sapiens]	0	FALSE	161.769	53	25	46	248	4	444	49.6	4.89	208.84	25	cell division;cell organization and biogenesis;cellular component movement;defense response;regulation of biological process;response to stimulus;transport	cytoplasm;cytoskeleton;extracellular;membrane;nucleus;organelle lumen	catalytic activity;nucleotide binding;protein binding;structural molecule activity	Pf00091, Pf03953, Pf10644	203068	ENSG00000232575.10; ENSG00000196230.12; ENSG00000227739.10; ENSG00000224156.10; ENSG00000235067.10; ENSG00000229684.10; ENSG00000183311.16; ENSG00000232421.10	TUBB	6; CHR_HSCHR6_MHC_MANN_CTG1; CHR_HSCHR6_MHC_COX_CTG1; CHR_HSCHR6_MHC_APD_CTG1; CHR_HSCHR6_MHC_DBB_CTG1; CHR_HSCHR6_MHC_MCF_CTG1; CHR_HSCHR6_MHC_QBL_CTG1; CHR_HSCHR6_MHC_SSTO_CTG1	Phagosome; Gap junction; Pathogenic Escherichia coli infection	Neutrophil degranulation; Regulation of PLK1 Activity at G2/M Transition; AURKA Activation by TPX2; Anchoring of the basal body to the plasma membrane; Recruitment of NuMA to mitotic centrosomes; Loss of Nlp from mitotic centrosomes; Recruitment of mitotic centrosome proteins and complexes	Pathogenic Escherichia coli infection; Parkin-Ubiquitin Proteasomal System pathway	24	0.978	0.733	0.56	0.827	0.93	0.873	0.387	0.816	96.2	94.7	94.5	100.9	90.3	114.9	97.5	110.7	100.3	4.23276e+08	4.16541e+08	4.15973e+08
High	Master Protein	O00159-2	Isoform 2 of Unconventional myosin-Ic [OS=Homo sapiens]	>ProteinCenter:SwissProt|O00159-2 Isoform 2 of Unconventional myosin-Ic [OS=Homo sapiens]	0	FALSE	161.566	46	41	44	158	1	1028	117.8	9.41	166.2	41	cell organization and biogenesis;regulation of biological process;response to stimulus;transport	cytoplasm;cytosol;membrane	catalytic activity;motor activity;nucleotide binding;protein binding	Pf00063, Pf06017	4641	ENSG00000197879.14	MYO1C	17			Insulin Signaling	1	0.81	0.783	1.618	1.596	1.295	0.818	0.501	0.829	97.3	78.8	76.2	157.4	155.3	126	79.6	48.7	80.7	1.05116e+07	8.51797e+06	8.23065e+06
High	Master Protein	P0DMV8	heat shock 70 kDa protein 1A [OS=Homo sapiens]	>ProteinCenter:SwissProt|P0DMV8 heat shock 70 kDa protein 1A [OS=Homo sapiens]	0	FALSE	152.078	48	31	36	175	21	641	70	5.66	197.13	31	cell organization and biogenesis;metabolic process;regulation of biological process;response to stimulus;transport	cytoplasm;cytoskeleton;cytosol;endoplasmic reticulum;extracellular;mitochondrion;nucleus	catalytic activity;nucleotide binding;protein binding;receptor activity;RNA binding	Pf00012, Pf06723	3304; 3303	ENSG00000232804.5; ENSG00000234475.5; ENSG00000231555.4; ENSG00000235941.5; ENSG00000204389.9; ENSG00000204388.6; ENSG00000212866.6; ENSG00000237724.5; ENSG00000224501.5	HSPA1B; HSPA1A	6; CHR_HSCHR6_MHC_APD_CTG1; CHR_HSCHR6_MHC_DBB_CTG1; CHR_HSCHR6_MHC_QBL_CTG1; CHR_HSCHR6_MHC_COX_CTG1	Endocytosis; Spliceosome; Measles; Antigen processing and presentation; Epstein-Barr virus infection; Toxoplasmosis; Legionellosis; Longevity regulating pathway - multiple species; MAPK signaling pathway; Influenza A; Prion diseases; Protein processing in endoplasmic reticulum; Estrogen signaling pathway	AUF1 (hnRNP D0) binds and destabilizes mRNA; Attenuation phase; Neutrophil degranulation; Regulation of HSF1-mediated heat shock response; Viral RNP Complexes in the Host Cell Nucleus; HSP90 chaperone cycle for steroid hormone receptors (SHR)	Apoptosis Modulation and Signaling; Parkin-Ubiquitin Proteasomal System pathway; NRF2 pathway; MAPK Signaling Pathway; Apoptosis Modulation by HSP70; VEGFA-VEGFR2 Signaling Pathway	38	0.893	1.025	1.252	1.728	1.421	0.493	0.497	0.356	109.7	115.9	143.3	115.1	139	112.7	66.5	45.3	52.4	8.96877e+08	9.47275e+08	1.17156e+09
High	Master Protein	P14923	Junction plakoglobin [OS=Homo sapiens]	>ProteinCenter:SwissProt|P14923 Junction plakoglobin [OS=Homo sapiens]	0	FALSE	150.309	47	27	34	134	23	745	81.7	6.14	174.26	27	cell death;cell organization and biogenesis;cellular component movement;regulation of biological process;response to stimulus;transport	cytoplasm;cytoskeleton;cytosol;extracellular;membrane;nucleus;organelle lumen	protein binding;signal transducer activity;structural molecule activity	Pf00514	3728	ENSG00000173801.16	JUP	17	Acute myeloid leukemia; Transcriptional misregulation in cancer; Arrhythmogenic right ventricular cardiomyopathy (ARVC); Pathways in cancer	Adherens junctions interactions; Neutrophil degranulation; Formation of the cornified envelope; VEGFR2 mediated vascular permeability	Arrhythmogenic Right Ventricular Cardiomyopathy; Corticotropin-releasing hormone signaling pathway; Ectoderm Differentiation	22	0.71	0.774	3.607	5.626	4.053	0.173	0.167	0.318	58.1	42.2	47.9	212.6	296.5	207.4	8.8	10	16.4	3.15672e+08	2.29073e+08	2.59905e+08
High	Master Protein	P15311	Ezrin [OS=Homo sapiens]	>ProteinCenter:SwissProt|P15311 Ezrin [OS=Homo sapiens]	0	FALSE	147.98	39	31	34	210	19	586	69.4	6.27	283.11	31	cell differentiation;cell organization and biogenesis;cellular component movement;metabolic process;regulation of biological process;response to stimulus;transport	cytoplasm;cytoskeleton;cytosol;endosome;membrane	protein binding;RNA binding	Pf00373, Pf00769, Pf09379, Pf09380	7430	ENSG00000092820.17	EZR	6	Gastric acid secretion; MicroRNAs in cancer; Regulation of actin cytoskeleton; Leukocyte transendothelial migration; Proteoglycans in cancer; Pathogenic Escherichia coli infection	Netrin-1 signaling; Recycling pathway of L1	Pathogenic Escherichia coli infection; AGE/RAGE pathway; VEGFA-VEGFR2 Signaling Pathway; Regulation of Actin Cytoskeleton	15	0.69	0.588	0.459	0.635	0.46	0.322	0.71	0.573	144.8	118.1	134.6	60.1	105.4	68.7	63.1	107.9	97.3	1.35608e+09	1.10559e+09	1.26031e+09
High	Master Protein	O60716-1	Catenin delta-1 [OS=Homo sapiens]	>ProteinCenter:SwissProt|O60716-1 Catenin delta-1 [OS=Homo sapiens]	0	FALSE	144.645	37	34	40	125	34	968	108.1	6.23	138.92	34	cell organization and biogenesis;metabolic process;regulation of biological process;response to stimulus	cytoplasm;cytosol;membrane;nucleus	protein binding	Pf00514	1500	ENSG00000198561.13	CTNND1	11	Leukocyte transendothelial migration; Rap1 signaling pathway; Adherens junction	VEGFR2 mediated vascular permeability; Adherens junctions interactions; InlA-mediated entry of Listeria monocytogenes into host cells	VEGFA-VEGFR2 Signaling Pathway; Wnt Signaling Pathway and Pluripotency	18	0.85	0.85	2.686	4.114	3.055	0.777	0.81	0.914	55.2	44	54.1	178.4	254	176.7	41.2	43.7	52.6	2.84872e+08	2.26944e+08	2.791e+08
High	Master Protein	P10809	60 kDa heat shock protein, mitochondrial [OS=Homo sapiens]	>ProteinCenter:SwissProt|P10809 60 kDa heat shock protein, mitochondrial [OS=Homo sapiens]	0	FALSE	141.173	49	28	32	129	28	573	61	5.87	165.51	28	cell organization and biogenesis;cell proliferation;metabolic process;regulation of biological process;response to stimulus;transport	cell surface;cytoplasm;cytosol;endosome;membrane;mitochondrion;organelle lumen	catalytic activity;DNA binding;nucleotide binding;protein binding;RNA binding	Pf00118	3329	ENSG00000144381.16	HSPD1	2	Tuberculosis; RNA degradation; Legionellosis; Type I diabetes mellitus	TFAP2A acts as a transcriptional repressor during retinoic acid induced cell differentiation; Mitochondrial protein import	Apoptosis-related network due to altered Notch3 in ovarian cancer; Sudden Infant Death Syndrome (SIDS) Susceptibility Pathways	13	1.291	1.468	9.604	9.517	0.435	1.542	4.621	4.899	23.2	31.1	39	223.2	263	8.5	35.4	146.1	130.5	2.10075e+08	2.80619e+08	3.52479e+08
High	Master Protein	P35222	Catenin beta-1 [OS=Homo sapiens]	>ProteinCenter:SwissProt|P35222 Catenin beta-1 [OS=Homo sapiens]	0	FALSE	139.532	45	27	32	159	23	781	85.4	5.86	201.61	27	cell communication;cell differentiation;cell growth;cell organization and biogenesis;cell proliferation;cellular component movement;metabolic process;regulation of biological process;response to stimulus;transport	cytoplasm;cytoskeleton;cytosol;membrane;nucleus	DNA binding;protein binding;signal transducer activity	Pf00514	1499	ENSG00000168036.16	CTNNB1	3	Hippo signaling pathway; Focal adhesion; Arrhythmogenic right ventricular cardiomyopathy (ARVC); HTLV-I infection; Pathways in cancer; Thyroid cancer; Endometrial cancer; Adherens junction; Pathogenic Escherichia coli infection; Wnt signaling pathway; Thyroid hormone signaling pathway; Basal cell carcinoma; Colorectal cancer; Leukocyte transendothelial migration; Rap1 signaling pathway; Tight jun…	Beta-catenin phosphorylation cascade; CDO in myogenesis; Binding of TCF/LEF:CTNNB1 to target gene promoters; Apoptotic cleavage of cell adhesion proteins; RUNX3 regulates WNT signaling; S37 mutants of beta-catenin aren't phosphorylated; LRR FLII-interacting protein 1 (LRRFIP1) activates type I IFN production; Ca2+ pathway; S33 mutants of beta-catenin aren't phosphorylated; Disassembly of the dest…	Androgen receptor signaling pathway; MicroRNAs in cardiomyocyte hypertrophy; Heart Development; TNF related weak inducer of apoptosis (TWEAK) Signaling Pathway; Neural Crest Differentiation; Arrhythmogenic Right Ventricular Cardiomyopathy; Pathogenic Escherichia coli infection; Corticotropin-releasing hormone signaling pathway; Adipogenesis; Gastric cancer network 2; Brain-Derived Neurotrophic Fa…	107	0.755	0.779	1.543	2.2	1.446	0.732	1.056	0.936	81.5	62.5	71.3	129.6	189.8	124.6	63.3	83	94.4	4.37978e+08	3.35619e+08	3.83193e+08
High	Master Protein	P05787 P05787	SWISS-PROT:P05787 Tax_Id=9606 Gene_Symbol=KRT8 Keratin, type II cytoskeletal 8 Keratin, type II cytoskeletal 8 [OS=Homo sapiens]	>P05787 SWISS-PROT:P05787 Tax_Id=9606 Gene_Symbol=KRT8 Keratin, type II cytoskeletal 8 >ProteinCenter:SwissProt|P05787 Keratin, type II cytoskeletal 8 [OS=Homo sapiens]	0	TRUE	137.064	69	29	36	99	24	483	53.7	5.59	115.1	29	cell death;cell differentiation;cell organization and biogenesis;regulation of biological process;response to stimulus	cytoplasm;cytoskeleton;cytosol;membrane;nucleus	catalytic activity;motor activity;protein binding;structural molecule activity	Pf00038, Pf01576, Pf13166, Pf15003	3856	ENSG00000170421.12	KRT8	12		Formation of the cornified envelope	Primary Focal Segmental Glomerulosclerosis FSGS	4	0.756	0.798	88.138	51.309	9.195	2.458	9.15	8.032	5.6	3.7	5	415.1	287.4	65	14.2	52.1	51.9	5.3172e+07	3.55136e+07	4.74983e+07
High	Master Protein	Q13885	Tubulin beta-2A chain [OS=Homo sapiens]	>ProteinCenter:SwissProt|Q13885 Tubulin beta-2A chain [OS=Homo sapiens]	0	FALSE	136.262	47	22	38	219	2	445	49.9	4.89	188.82	22	cell organization and biogenesis	cytoplasm;cytoskeleton;nucleus	catalytic activity;nucleotide binding;protein binding;structural molecule activity	Pf00091, Pf03953, Pf10644	7280	ENSG00000137267.5	TUBB2A	6	Phagosome; Pathogenic Escherichia coli infection; Gap junction	COPI-independent Golgi-to-ER retrograde traffic; COPI-dependent Golgi-to-ER retrograde traffic; Carboxyterminal post-translational modifications of tubulin; Recruitment of NuMA to mitotic centrosomes; Hedgehog 'off' state; Translocation of GLUT4 to the plasma membrane; Prefoldin mediated transfer of substrate to CCT/TriC; Microtubule-dependent trafficking of connexons from Golgi to the plasma mem…	Pathogenic Escherichia coli infection; Parkin-Ubiquitin Proteasomal System pathway	65	1.087	1.061	1.257	1.151	1.267	0.932	1.321	0.75	115.1	132.1	155	70.6	64.6	71.1	118.5	74.2	98.7	1.11671e+07	1.28265e+07	1.50419e+07
High	Master Protein	P04406	glyceraldehyde-3-phosphate dehydrogenase [OS=Homo sapiens]	>ProteinCenter:SwissProt|P04406 glyceraldehyde-3-phosphate dehydrogenase [OS=Homo sapiens]	0	FALSE	134.329	55	22	37	169	22	335	36	8.46	153.1	22	cell death;cell organization and biogenesis;defense response;metabolic process;regulation of biological process;response to stimulus	cytoplasm;cytoskeleton;cytosol;membrane;nucleus	catalytic activity;enzyme regulator activity;nucleotide binding;protein binding	Pf00044, Pf02800	2597	ENSG00000111640.14	GAPDH	12	Metabolic pathways; Alzheimer's disease; Biosynthesis of amino acids; Carbon metabolism; Glycolysis / Gluconeogenesis; HIF-1 signaling pathway	Gluconeogenesis; Glycolysis	Cori Cycle; Alzheimers Disease; Glycolysis and Gluconeogenesis; Sudden Infant Death Syndrome (SIDS) Susceptibility Pathways	15	0.752	0.678	1.45	1.284	1.164	0.996	1.844	1.58	81.5	72.3	71.7	114.2	118.4	94.9	96.4	121.1	129.5	3.1687e+09	2.8119e+09	2.78999e+09
High	Master Protein	P12814-1	Alpha-actinin-1 [OS=Homo sapiens]	>ProteinCenter:SwissProt|P12814-1 Alpha-actinin-1 [OS=Homo sapiens]	0	FALSE	132.748	39	30	34	152	13	892	103	5.41	166.22	30	cell differentiation;cell organization and biogenesis;regulation of biological process;transport	cytoplasm;cytoskeleton;cytosol;extracellular;membrane;organelle lumen	metal ion binding;protein binding;RNA binding	Pf00036, Pf00307, Pf00435, Pf08726, Pf11971, Pf13405, Pf13499	87	ENSG00000072110.13	ACTN1	14	Focal adhesion; Amoebiasis; Regulation of actin cytoskeleton; Tight junction; Viral carcinogenesis; Systemic lupus erythematosus; Adherens junction; Arrhythmogenic right ventricular cardiomyopathy (ARVC); Leukocyte transendothelial migration	Platelet degranulation ; Nephrin family interactions; Regulation of cytoskeletal remodeling and cell spreading by IPP complex components; Syndecan interactions	Arrhythmogenic Right Ventricular Cardiomyopathy; Focal Adhesion; Regulation of Actin Cytoskeleton	24	0.743	0.769	2.382	3.062	1.84	2.591	4.39	5.134	39.4	28.4	31	88.6	121.2	69.5	106.9	193.4	221.7	1.07839e+08	7.75682e+07	8.4646e+07
High	Master Protein	P04350	Tubulin beta-4A chain [OS=Homo sapiens]	>ProteinCenter:SwissProt|P04350 Tubulin beta-4A chain [OS=Homo sapiens]	0	FALSE	130.961	44	18	34	219	2	444	49.6	4.88	174.67	18	cell organization and biogenesis;regulation of biological process	cytoplasm;cytoskeleton;cytosol;nucleus	catalytic activity;metal ion binding;nucleotide binding;protein binding;structural molecule activity	Pf00091, Pf03953, Pf10644	10382	ENSG00000104833.11	TUBB4A	19	Pathogenic Escherichia coli infection; Gap junction; Phagosome	COPI-independent Golgi-to-ER retrograde traffic; COPI-dependent Golgi-to-ER retrograde traffic; Carboxyterminal post-translational modifications of tubulin; Regulation of PLK1 Activity at G2/M Transition; Recruitment of NuMA to mitotic centrosomes; Hedgehog 'off' state; Loss of Nlp from mitotic centrosomes; Translocation of GLUT4 to the plasma membrane; Prefoldin mediated transfer of substrate to…	Pathogenic Escherichia coli infection; Parkin-Ubiquitin Proteasomal System pathway	72	1.12	0.971	0.513	0.231	0.132	0.772	0.328	0.591	158.6	180.9	153.9	90.1	16.2	47.4	121.7	23	108.1	1.38127e+07	1.57494e+07	1.34005e+07
High	Master Protein	P35221	Catenin alpha-1 [OS=Homo sapiens]	>ProteinCenter:SwissProt|P35221 Catenin alpha-1 [OS=Homo sapiens]	0	FALSE	129.824	41	35	36	93	31	906	100	6.29	103.14	35	cell organization and biogenesis;regulation of biological process;response to stimulus	cytoplasm;cytoskeleton;cytosol;Golgi;membrane	protein binding;RNA binding;structural molecule activity	Pf01044	1495	ENSG00000044115.20	CTNNA1	5	Leukocyte transendothelial migration; Hippo signaling pathway; Pathways in cancer; Arrhythmogenic right ventricular cardiomyopathy (ARVC); Bacterial invasion of epithelial cells; Adherens junction; Endometrial cancer; Tight junction	Adherens junctions interactions; CDO in myogenesis; VEGFR2 mediated vascular permeability; RHO GTPases activate IQGAPs	Arrhythmogenic Right Ventricular Cardiomyopathy; Apoptosis-related network due to altered Notch3 in ovarian cancer; VEGFA-VEGFR2 Signaling Pathway; White fat cell differentiation	27	0.722	0.697	4.046	5.864	3.938	0.531	0.815	0.729	46.9	34	33	206.5	288.2	200.5	28	35.6	27.5	2.83645e+08	2.05588e+08	1.99281e+08
High	Master Protein	O00560-1	Syntenin-1 [OS=Homo sapiens]	>ProteinCenter:SwissProt|O00560-1 Syntenin-1 [OS=Homo sapiens]	0	FALSE	129.303	72	20	32	188	1	298	32.4	7.53	183.24	20	cell communication;cell organization and biogenesis;regulation of biological process;response to stimulus;transport	cytoplasm;cytoskeleton;cytosol;endoplasmic reticulum;extracellular;membrane;nucleus;organelle lumen	protein binding	Pf00595, Pf13180	6386	ENSG00000137575.11	SDCBP	8		Ephrin signaling; Neutrophil degranulation; Neurofascin interactions	Ectoderm Differentiation	10	0.973	0.896	0.356	0.01	0.01	1.014	0.043	0.539	223.3	196.2	121.8	93.9			170	4.9	89.9	8.13091e+07	7.14582e+07	4.43732e+07
High	Master Protein	P11021	78 kDa glucose-regulated protein [OS=Homo sapiens]	>ProteinCenter:SwissProt|P11021 78 kDa glucose-regulated protein [OS=Homo sapiens]	0	FALSE	128.581	35	27	31	106	25	654	72.3	5.16	107.45	27	cell communication;cell death;cell differentiation;cell organization and biogenesis;metabolic process;regulation of biological process;response to stimulus;transport	cell surface;cytoplasm;endoplasmic reticulum;membrane;mitochondrion;nucleus;organelle lumen	catalytic activity;metal ion binding;nucleotide binding;protein binding	Pf00012, Pf01968, Pf06723	3309	ENSG00000044574.7	HSPA5	9	Thyroid hormone synthesis; Prion diseases; Antigen processing and presentation; Protein export; Protein processing in endoplasmic reticulum	Platelet degranulation ; PERK regulates gene expression; ATF6 (ATF6-alpha) activates chaperone genes; Antigen Presentation: Folding, assembly and peptide loading of class I MHC; Regulation of HSF1-mediated heat shock response; IRE1alpha activates chaperones	Parkin-Ubiquitin Proteasomal System pathway; Apoptosis-related network due to altered Notch3 in ovarian cancer; Photodynamic therapy-induced unfolded protein response; MAPK Signaling Pathway	27	0.858	0.95	6.671	6.255	0.844	1.696	3.181	3.103	31.9	28.7	33	211.3	243.4	26.1	59.5	147.6	118.6	1.12158e+08	1.01033e+08	1.16222e+08
High	Master Protein	P07900	Heat shock protein HSP 90-alpha [OS=Homo sapiens]	>ProteinCenter:SwissProt|P07900 Heat shock protein HSP 90-alpha [OS=Homo sapiens]	0	FALSE	127.63	32	26	32	136	17	732	84.6	5.02	145.26	26	cell organization and biogenesis;metabolic process;regulation of biological process;response to stimulus;transport	cytoplasm;cytosol;extracellular;membrane;nucleus;organelle lumen	catalytic activity;enzyme regulator activity;nucleotide binding;protein binding;RNA binding	Pf00183, Pf02518, Pf13589	3320	ENSG00000080824.18	HSP90AA1	14	NOD-like receptor signaling pathway; Antigen processing and presentation; Protein processing in endoplasmic reticulum; Progesterone-mediated oocyte maturation; PI3K-Akt signaling pathway; Prostate cancer; Estrogen signaling pathway; Pathways in cancer	Sema3A PAK dependent Axon repulsion; Regulation of PLK1 Activity at G2/M Transition; Recruitment of NuMA to mitotic centrosomes; Loss of Nlp from mitotic centrosomes; Scavenging by Class F Receptors; Neutrophil degranulation; Uptake and function of diphtheria toxin; Regulation of actin dynamics for phagocytic cup formation; The role of GTSE1 in G2/M progression after G2 checkpoint; HSP90 chaperon…	Nucleotide-binding Oligomerization Domain (NOD) pathway; TNF alpha Signaling Pathway; Corticotropin-releasing hormone signaling pathway; Aryl Hydrocarbon Receptor; EBV LMP1 signaling; Aryl Hydrocarbon Receptor Pathway; Constitutive Androstane Receptor Pathway; NRF2 pathway; VEGFA-VEGFR2 Signaling Pathway; Focal Adhesion-PI3K-Akt-mTOR-signaling pathway	86	0.671	0.71	0.974	1.332	0.826	0.564	1.646	1.386	87.9	75.3	86.1	59.9	85.3	51.2	81	196.5	176.7	4.48186e+08	3.8394e+08	4.38761e+08
High	Master Protein	P02751	fibronectin [OS=Homo sapiens]	>ProteinCenter:SwissProt|P02751 fibronectin [OS=Homo sapiens]	0	FALSE	127.329	17	30	30	174	30	2386	262.5	5.71	156.22	30	cell differentiation;cell organization and biogenesis;cellular component movement;defense response;metabolic process;regulation of biological process;response to stimulus;transport	extracellular;membrane;organelle lumen	enzyme regulator activity;protein binding	Pf00039, Pf00040, Pf00041	2335	ENSG00000115414.18	FN1	2	Proteoglycans in cancer; PI3K-Akt signaling pathway; Amoebiasis; Regulation of actin cytoskeleton; Pathways in cancer; Bacterial invasion of epithelial cells; AGE-RAGE signaling pathway in diabetic complications; Small cell lung cancer; Focal adhesion; ECM-receptor interaction	Post-translational protein phosphorylation; Integrin cell surface interactions; Regulation of Insulin-like Growth Factor (IGF) transport and uptake by Insulin-like Growth Factor Binding Proteins (IGFBPs); Signaling by BRAF and RAF fusions; MET activates PTK2 signaling; MAP2K and MAPK activation; Molecules associated with elastic fibres; GRB2:SOS provides linkage to MAPK signaling for Integrins ; …	miRNA targets in ECM and membrane receptors; Focal Adhesion; Overview of nanoparticle effects; Rac1/Pak1/p38/MMP-2 pathway; TGF-beta Signaling Pathway; Simplified Interaction Map Between LOXL4 and Oxidative Stress Pathway; Association Between Physico-Chemical Features and Toxicity Associated Pathways; TGF-B Signaling in Thyroid Cells for Epithelial-Mesenchymal Transition; Focal Adhesion-PI3K-Akt-…	68	1.281	1.095	0.298	0.299	0.466	0.772	0.688	1.023	135.5	157.7	158.6	42.5	42.7	63.6	94.7	65.7	138.9	1.6741e+09	1.94811e+09	1.95861e+09
High	Master Protein	Q14764	major vault protein [OS=Homo sapiens]	>ProteinCenter:SwissProt|Q14764 major vault protein [OS=Homo sapiens]	0	FALSE	124.792	40	32	33	107	32	893	99.3	5.48	101.14	32	regulation of biological process;response to stimulus;transport	cytoplasm;cytoskeleton;cytosol;extracellular;membrane;nucleus;organelle lumen	protein binding	Pf01145, Pf01505, Pf11978	9961	ENSG00000013364.18	MVP	16		Neutrophil degranulation		3	0.771	0.61	1.094	1.583	1.099	0.253	0.163	0.152	132.6	105	96.4	134.5	199.5	141.1	35.2	35	20.7	4.23805e+08	3.35705e+08	3.07991e+08
High	Master Protein	P08238	Heat shock protein HSP 90-beta [OS=Homo sapiens]	>ProteinCenter:SwissProt|P08238 Heat shock protein HSP 90-beta [OS=Homo sapiens]	0	FALSE	122.639	35	27	32	134	17	724	83.2	5.03	132.67	27	cell organization and biogenesis;metabolic process;regulation of biological process;response to stimulus;transport	cell surface;cytoplasm;cytosol;extracellular;membrane;mitochondrion;nucleus;organelle lumen	enzyme regulator activity;nucleotide binding;protein binding;RNA binding	Pf00183, Pf02518, Pf13589	3326	ENSG00000096384.19	HSP90AB1	6	Estrogen signaling pathway; Pathways in cancer; PI3K-Akt signaling pathway; Prostate cancer; NOD-like receptor signaling pathway; Antigen processing and presentation; Protein processing in endoplasmic reticulum; Progesterone-mediated oocyte maturation	Sema3A PAK dependent Axon repulsion; HSF1 activation; Attenuation phase; Neutrophil degranulation; Aryl hydrocarbon receptor signalling; Uptake and function of diphtheria toxin; Regulation of actin dynamics for phagocytic cup formation; The NLRP3 inflammasome; HSP90 chaperone cycle for steroid hormone receptors (SHR); The role of GTSE1 in G2/M progression after G2 checkpoint	NRF2 pathway; Focal Adhesion-PI3K-Akt-mTOR-signaling pathway	42	0.751	0.837	0.921	0.928	0.498	0.713	1.192	1.266	113.6	84.3	89	92.3	111.4	57.6	81.4	125	145.4	9.117e+08	6.76612e+08	7.1418e+08
High	Master Protein	O00560-2	Isoform 2 of Syntenin-1 [OS=Homo sapiens]	>ProteinCenter:SwissProt|O00560-2 Isoform 2 of Syntenin-1 [OS=Homo sapiens]	0	FALSE	122.513	72	20	31	181	1	297	32.3	7.53	175.56	20	cell communication;cell organization and biogenesis;regulation of biological process;response to stimulus;transport	cytoplasm;cytoskeleton;cytosol;extracellular;membrane;nucleus;organelle lumen	protein binding	Pf00595, Pf13180	6386	ENSG00000137575.11	SDCBP	8			Ectoderm Differentiation	1	0.931	0.28	0.611	0.01	0.01	0.625	0.01	0.48	229.2	213.4	64.1	140.1			143.3		110	1.07643e+07	1.00249e+07	3.00914e+06
High	Master Protein	P55011	Solute carrier family 12 member 2 [OS=Homo sapiens]	>ProteinCenter:SwissProt|P55011 Solute carrier family 12 member 2 [OS=Homo sapiens]	0	FALSE	122.131	30	28	31	95	28	1212	131.4	6.4	100.62	28	cellular homeostasis;regulation of biological process;response to stimulus;transport	membrane	catalytic activity;nucleotide binding;protein binding;transporter activity	Pf00324, Pf08403, Pf13520	6558	ENSG00000064651.13	SLC12A2	5	Pancreatic secretion; Vibrio cholerae infection; Salivary secretion	Cation-coupled Chloride cotransporters		7	0.743	0.792	16.311	26.787	17.128	2.901	4.501	3.712	11.6	8.5	8.3	232.3	300.8	202.7	38.5	51.8	45.5	3.91195e+07	2.88094e+07	2.82339e+07
High	Master Protein	P18206	Vinculin [OS=Homo sapiens]	>ProteinCenter:SwissProt|P18206 Vinculin [OS=Homo sapiens]	0	FALSE	121.162	34	34	37	114	34	1134	123.7	5.66	123.14	34	cell growth;cell organization and biogenesis;cellular component movement;regulation of biological process;transport	cytoplasm;cytoskeleton;cytosol;extracellular;membrane;organelle lumen	protein binding;structural molecule activity	Pf01044	7414	ENSG00000035403.17	VCL	10	Shigellosis; Regulation of actin cytoskeleton; Amoebiasis; Bacterial invasion of epithelial cells; Adherens junction; Leukocyte transendothelial migration; Focal adhesion	Signaling by BRAF and RAF fusions; MAP2K and MAPK activation; Smooth Muscle Contraction; Signaling by RAS mutants; Signaling by high-kinase activity BRAF mutants; Signaling by moderate kinase activity BRAF mutants; Platelet degranulation ; Paradoxical activation of RAF signaling by kinase inactive BRAF; Neutrophil degranulation; Interleukin-20 family signaling	Integrin-mediated Cell Adhesion; Primary Focal Segmental Glomerulosclerosis FSGS; Focal Adhesion; VEGFA-VEGFR2 Signaling Pathway; Regulation of Actin Cytoskeleton	37	0.848	0.717	0.842	1.215	0.812	0.937	1.723	1.345	94.4	82.7	81.2	82.2	108.6	85.9	93.6	130.3	141	2.49093e+08	2.18438e+08	2.14317e+08
High	Master Protein	Q71U36	tubulin alpha-1A chain [OS=Homo sapiens]	>ProteinCenter:SwissProt|Q71U36 tubulin alpha-1A chain [OS=Homo sapiens]	0	FALSE	119.96	49	21	24	143	1	451	50.1	5.06	96.65	21	cell division;cell organization and biogenesis;regulation of biological process;transport	cytoplasm;cytoskeleton;cytosol;endosome;membrane;nucleus	catalytic activity;nucleotide binding;protein binding;structural molecule activity	Pf00091, Pf03953	7846	ENSG00000167552.13	TUBA1A	12	Apoptosis; Gap junction; Phagosome; Pathogenic Escherichia coli infection	COPI-independent Golgi-to-ER retrograde traffic; COPI-dependent Golgi-to-ER retrograde traffic; Carboxyterminal post-translational modifications of tubulin; Regulation of PLK1 Activity at G2/M Transition; Recruitment of NuMA to mitotic centrosomes; Hedgehog 'off' state; Loss of Nlp from mitotic centrosomes; Translocation of GLUT4 to the plasma membrane; Prefoldin mediated transfer of substrate to…	Pathogenic Escherichia coli infection; Parkin-Ubiquitin Proteasomal System pathway	73	0.872	0.313	0.766	0.531	0.899	0.553	0.524	0.364	154.6	134.9	48.3	118.4	82.2	138.9	85.5	81.1	56.2	5.25169e+07	4.58131e+07	1.64207e+07
High	Master Protein	P68366	Tubulin alpha-4A chain [OS=Homo sapiens]	>ProteinCenter:SwissProt|P68366 Tubulin alpha-4A chain [OS=Homo sapiens]	0	FALSE	118.527	45	20	23	151	6	448	49.9	5.06	107.54	20	cell organization and biogenesis;regulation of biological process;transport	cytoplasm;cytoskeleton;cytosol;extracellular	catalytic activity;nucleotide binding;protein binding;structural molecule activity	Pf00091, Pf03953	7277	ENSG00000127824.13	TUBA4A	2	Apoptosis; Gap junction; Phagosome; Pathogenic Escherichia coli infection	COPI-independent Golgi-to-ER retrograde traffic; COPI-dependent Golgi-to-ER retrograde traffic; Carboxyterminal post-translational modifications of tubulin; Regulation of PLK1 Activity at G2/M Transition; Recruitment of NuMA to mitotic centrosomes; Hedgehog 'off' state; Loss of Nlp from mitotic centrosomes; Translocation of GLUT4 to the plasma membrane; Prefoldin mediated transfer of substrate to…	Pathogenic Escherichia coli infection; Parkin-Ubiquitin Proteasomal System pathway	76	1.24	1.316	0.593	0.93	1.105	1.353	0.793	0.927	110.3	136.9	142.4	56.8	41.7	83.3	153.4	84.9	90.3	1.59369e+09	1.97797e+09	2.05861e+09
High	Master Protein	P78527	DNA-dependent protein kinase catalytic subunit [OS=Homo sapiens]	>ProteinCenter:SwissProt|P78527 DNA-dependent protein kinase catalytic subunit [OS=Homo sapiens]	0	FALSE	118.372	12	42	43	81	42	4128	468.8	7.12	81.55	42	cell death;cell differentiation;cell organization and biogenesis;cell proliferation;defense response;metabolic process;regulation of biological process;response to stimulus	cytosol;membrane;nucleus	catalytic activity;DNA binding;nucleotide binding;protein binding;RNA binding	Pf00454, Pf02259, Pf02260, Pf08163	5591	ENSG00000253729.7	PRKDC	8	Cell cycle; Non-homologous end-joining	Nonhomologous End-Joining (NHEJ); E3 ubiquitin ligases ubiquitinate target proteins; IRF3-mediated induction of type I IFN	miRNA Regulation of DNA Damage Response; Cell Cycle; Retinoblastoma (RB) in Cancer; Fas Ligand (FasL) pathway and Stress induction of Heat Shock Proteins (HSP) regulation; Pathways Affected in Adenoid Cystic Carcinoma; ATM Signaling Network in Development and Disease; Non-homologous end joining; DNA Damage Response	22	0.657	0.702	8.201	4.265	2.814	0.911	1.562	0.981	42.6	34	34.2	338.7	189.3	113.7	41.2	63.1	43.1	4.46495e+07	3.5684e+07	3.58674e+07
High	Master Protein	Q9BQE3	Tubulin alpha-1C chain [OS=Homo sapiens]	>ProteinCenter:SwissProt|Q9BQE3 Tubulin alpha-1C chain [OS=Homo sapiens]	0	FALSE	118.346	49	21	24	152	1	449	49.9	5.1	96.73	21	cell division;cell organization and biogenesis;transport	cytoplasm;cytoskeleton;nucleus	catalytic activity;nucleotide binding;protein binding;structural molecule activity	Pf00091, Pf03953	84790	ENSG00000167553.15	TUBA1C	12	Pathogenic Escherichia coli infection; Phagosome; Apoptosis; Gap junction	COPI-independent Golgi-to-ER retrograde traffic; COPI-dependent Golgi-to-ER retrograde traffic; Carboxyterminal post-translational modifications of tubulin; Recruitment of NuMA to mitotic centrosomes; Hedgehog 'off' state; Translocation of GLUT4 to the plasma membrane; Prefoldin mediated transfer of substrate to CCT/TriC; Microtubule-dependent trafficking of connexons from Golgi to the plasma mem…	Pathogenic Escherichia coli infection; Parkin-Ubiquitin Proteasomal System pathway	66			100	100		100	100	100				239.9	212.3		101	97	249.8
High	Master Protein	P68032	Actin, alpha cardiac muscle 1 [OS=Homo sapiens]	>ProteinCenter:SwissProt|P68032 Actin, alpha cardiac muscle 1 [OS=Homo sapiens]	0	FALSE	117.748	46	21	32	351	3	377	42	5.39	436.03	21	cell death;cell organization and biogenesis;cellular component movement;regulation of biological process;response to stimulus	cytoplasm;cytoskeleton;cytosol;membrane	catalytic activity;nucleotide binding;protein binding	Pf00022	70	ENSG00000159251.6	ACTC1	15	Hypertrophic cardiomyopathy (HCM); Adrenergic signaling in cardiomyocytes; Cardiac muscle contraction; Dilated cardiomyopathy	Striated Muscle Contraction	Cardiac Progenitor Differentiation; Myometrial Relaxation and Contraction Pathways; Striated Muscle Contraction	9	1.1	0.959	0.601	0.593	1.363	0.842	0.648	0.594	111.3	133	106.5	66.9	69.6	154.1	10.8	176	71.8	1.09066e+07	1.3024e+07	1.04359e+07
High	Master Protein	P15497	SWISS-PROT:P15497 (Bos taurus) Apolipoprotein A-I precursor	>P15497 SWISS-PROT:P15497 (Bos taurus) Apolipoprotein A-I precursor	0	TRUE	117.089	64	25	26	123	25	265	30.3	5.97	124.22	25	cell organization and biogenesis;cell proliferation;cellular component movement;metabolic process;regulation of biological process;response to stimulus;transport	extracellular	enzyme regulator activity;protein binding;transporter activity	Pf01442	281631	ENSBTAG00000002258.2	APOA1	15	Fat digestion and absorption; Vitamin digestion and absorption; PPAR signaling pathway; African trypanosomiasis	HDL assembly; Scavenging of heme from plasma; Scavenging by Class B Receptors; ABC transporters in lipid homeostasis; HDL clearance; HDL remodeling; Post-translational protein phosphorylation; Chylomicron assembly; Retinoid metabolism and transport; Regulation of Insulin-like Growth Factor (IGF) transport and uptake by Insulin-like Growth Factor Binding Proteins (IGFBPs); Signaling by GPCR; Chylo…	Statin Pathway; Folate Metabolism; Vitamin B12 Metabolism; Selenium Micronutrient Network; PPAR Alpha Pathway	41	0.549	0.358	1.037	1.088	1.667	0.226	0.58	0.244	129	73.4	52.1	152	136	202.8	35.8	87.8	31.1	1.93532e+09	1.10061e+09	7.81326e+08
High	Master Protein	Q5T4S7-1	e3 ubiquitin-protein ligase UBR4 [OS=Homo sapiens]	>ProteinCenter:SwissProt|Q5T4S7-1 e3 ubiquitin-protein ligase UBR4 [OS=Homo sapiens]	0	FALSE	117.024	8	37	37	117	37	5183	573.5	6.04	105.93	37	metabolic process;transport	cytoplasm;cytoskeleton;cytosol;membrane;nucleus	catalytic activity;metal ion binding;protein binding	Pf02207, Pf13764	23352	ENSG00000127481.14	UBR4	1	Viral carcinogenesis	Neutrophil degranulation; Antigen processing: Ubiquitination & Proteasome degradation		7	0.897	0.938	0.694	0.548	0.864	0.961	0.871	0.615	113.2	112.6	125.5	74.5	54.2	82.8	134	104	99.3	2.48159e+08	2.46836e+08	2.75164e+08
High	Master Protein	P27708	CAD protein [OS=Homo sapiens]	>ProteinCenter:SwissProt|P27708 CAD protein [OS=Homo sapiens]	0	FALSE	116.919	19	35	36	116	35	2225	242.8	6.46	111.1	35	metabolic process	cytoplasm;cytosol;membrane;nucleus	catalytic activity;metal ion binding;nucleotide binding;protein binding	Pf00117, Pf00185, Pf00289, Pf00988, Pf01979, Pf02142, Pf02222, Pf02729, Pf02786, Pf02787, Pf07478, Pf07722, Pf13147, Pf13535, Pf13594, Pf15632	790	ENSG00000084774.13	CAD	2	Metabolic pathways; Pyrimidine metabolism; Alanine, aspartate and glutamate metabolism	Pyrimidine biosynthesis	Endothelin Pathways; Amino Acid metabolism	9	0.825	0.737	1.113	1.073	1.026	1.101	1.421	1.015	101.6	91.9	87	100.5	82.5	85.6	120.2	121.5	109.2	2.67803e+08	2.42309e+08	2.29261e+08
High	Master Protein	P14618	Pyruvate kinase PKM [OS=Homo sapiens]	>ProteinCenter:SwissProt|P14618 Pyruvate kinase PKM [OS=Homo sapiens]	0	FALSE	116.012	58	29	30	124	2	531	57.9	7.84	122.59	29	cell death;cell organization and biogenesis;metabolic process;response to stimulus;transport	cytoplasm;cytosol;extracellular;mitochondrion;nucleus;organelle lumen	catalytic activity;metal ion binding;nucleotide binding;protein binding;RNA binding	Pf00224, Pf02887	5315	ENSG00000067225.17	PKM	15	Glycolysis / Gluconeogenesis; Pyruvate metabolism; Central carbon metabolism in cancer; Biosynthesis of amino acids; Type II diabetes mellitus; Carbon metabolism; Metabolic pathways; Glucagon signaling pathway; Purine metabolism; Viral carcinogenesis	Glycolysis; Neutrophil degranulation	Photodynamic therapy-induced HIF-1 survival signaling; Amino Acid metabolism; Glycolysis and Gluconeogenesis	20	0.627	0.372	3.866	7.014	3.117	0.967	3.066	2.28	37.8	23.7	14.1	146.1	289.3	133.9	36.6	132.4	86.2	1.03865e+07	6.51608e+06	3.86557e+06
High	Master Protein	P14618-2	Isoform M1 of Pyruvate kinase PKM [OS=Homo sapiens]	>ProteinCenter:SwissProt|P14618-2 Isoform M1 of Pyruvate kinase PKM [OS=Homo sapiens]	0	FALSE	113.277	53	28	29	124	1	531	58	7.71	132.32	28	cell death;cell organization and biogenesis;metabolic process;response to stimulus;transport	cytoplasm;cytosol;extracellular;mitochondrion;nucleus;organelle lumen	catalytic activity;metal ion binding;nucleotide binding;protein binding;RNA binding	Pf00224, Pf02887	5315	ENSG00000067225.17	PKM	15		Glycolysis	Photodynamic therapy-induced HIF-1 survival signaling; Amino Acid metabolism; Glycolysis and Gluconeogenesis	7	0.887	0.922	0.425	0.384	0.609	0.77	0.593	0.533	147	130.3	135.5	62.5	56.5	89.5	113.1	87.2	78.4	1.85061e+07	1.6406e+07	1.7064e+07
High	Master Protein	P53396-1	ATP-citrate synthase [OS=Homo sapiens]	>ProteinCenter:SwissProt|P53396-1 ATP-citrate synthase [OS=Homo sapiens]	0	FALSE	111.858	29	32	33	116	32	1101	120.8	7.33	117.97	32	metabolic process;regulation of biological process;transport	cytoplasm;cytosol;extracellular;membrane;organelle lumen	catalytic activity;metal ion binding;nucleotide binding;protein binding	Pf00285, Pf00549, Pf02629, Pf08442	47	ENSG00000131473.16	ACLY	17	Citrate cycle (TCA cycle); Metabolic pathways	ChREBP activates metabolic gene expression; Fatty acyl-CoA biosynthesis; Neutrophil degranulation	Sterol Regulatory Element-Binding Proteins (SREBP) signalling; TCA Cycle and Deficiency of Pyruvate Dehydrogenase complex (PDHc); Fatty Acid Biosynthesis; Amino Acid metabolism	15	0.757	0.87	0.774	0.697	0.712	0.557	0.608	0.563	139.6	110.7	140.2	101.4	93.4	83.5	88.1	66.6	76.6	4.73876e+08	3.75942e+08	4.76055e+08
High	Master Protein	P13639	Elongation factor 2 [OS=Homo sapiens]	>ProteinCenter:SwissProt|P13639 Elongation factor 2 [OS=Homo sapiens]	0	FALSE	111.79	32	22	25	146	21	858	95.3	6.83	138.24	22	cell differentiation;cell proliferation;metabolic process;regulation of biological process;response to stimulus;transport	cytoplasm;cytosol;extracellular;membrane;nucleus;organelle lumen;ribosome	catalytic activity;nucleotide binding;protein binding;RNA binding	Pf00009, Pf00679, Pf03144, Pf03764, Pf14492	1938	ENSG00000167658.15	EEF2	19	Oxytocin signaling pathway; AMPK signaling pathway	Peptide chain elongation; Protein methylation; Synthesis of diphthamide-EEF2; Neutrophil degranulation; Uptake and function of diphtheria toxin	Translation Factors; AMP-activated Protein Kinase (AMPK) Signaling; Brain-Derived Neurotrophic Factor (BDNF) signaling pathway	20	0.763	0.648	1.245	1.26	0.79	0.64	1.506	1.108	110.2	80	69.6	134.5	113.2	74.9	72.1	121.9	123.6	7.84052e+08	5.69291e+08	4.95481e+08
High	Master Protein	Q7Z406-2	Isoform 2 of Myosin-14 [OS=Homo sapiens]	>ProteinCenter:SwissProt|Q7Z406-2 Isoform 2 of Myosin-14 [OS=Homo sapiens]	0	FALSE	111.043	18	31	33	65	26	2036	231.9	5.6	82.43	31	cell organization and biogenesis;cellular component movement;regulation of biological process;response to stimulus	cytosol;membrane	catalytic activity;motor activity;nucleotide binding;protein binding	Pf00063, Pf01576	79784	ENSG00000105357.15	MYH14	19				0	0.867	0.708	26.737	21.706	9.913	0.644	1.894	1.222	22.2	16.8	12.9	278.5	296.8	182.6	23	43.4	23.8	1.8266e+07	1.3842e+07	1.0642e+07
High	Master Protein	P02672	SWISS-PROT:P02672 (Bos taurus) Fibrinogen alpha chain precursor	>P02672 SWISS-PROT:P02672 (Bos taurus) Fibrinogen alpha chain precursor	0	TRUE	110.947	39	23	28	177	23	615	67	7.17	168.97	23	cell organization and biogenesis;coagulation;defense response;regulation of biological process;response to stimulus	extracellular	protein binding	Pf08702, Pf12160, Pf15619	522039		FGA	17	Complement and coagulation cascades; Platelet activation			2	1.284	1.154	0.402	0.249	0.486	0.865	0.534	0.641	131	170.9	177.8	47.9	32.6	68.9	116.9	67.9	86.2	2.42048e+09	3.15649e+09	3.28492e+09
High	Master Protein	P06733-1	alpha-enolase [OS=Homo sapiens]	>ProteinCenter:SwissProt|P06733-1 alpha-enolase [OS=Homo sapiens]	0	FALSE	110.844	57	20	28	140	17	434	47.1	7.39	98.53	20	metabolic process;regulation of biological process;response to stimulus	cell surface;cytoplasm;cytosol;membrane;nucleus	catalytic activity;DNA binding;metal ion binding;protein binding;RNA binding	Pf00113, Pf03952, Pf13378	2023	ENSG00000074800.13	ENO1	1	RNA degradation; HIF-1 signaling pathway; Metabolic pathways; Glycolysis / Gluconeogenesis; Biosynthesis of amino acids; Carbon metabolism	Gluconeogenesis; Glycolysis	Glycolysis and Gluconeogenesis	12	0.737	0.737	1.703	2.171	1.246	0.982	1.842	2.088	73.2	61	65.4	107.2	149.3	87.6	77.2	131.4	147.7	1.11498e+09	9.29066e+08	9.95374e+08
High	Master Protein	Q9P2B2	prostaglandin F2 receptor negative regulator [OS=Homo sapiens]	>ProteinCenter:SwissProt|Q9P2B2 prostaglandin F2 receptor negative regulator [OS=Homo sapiens]	0	FALSE	110.25	30	26	28	160	26	879	98.5	6.61	162	26	cell organization and biogenesis	cell surface;endoplasmic reticulum;Golgi;membrane	protein binding	Pf07679	5738	ENSG00000134247.9	PTGFRN	1				0	0.856	0.972	0.342	0.348	0.535	0.987	0.797	0.426	143.1	127.9	157.6	43.3	41.2	60.8	147	112.7	66.5	2.26646e+09	2.02579e+09	2.49738e+09
High	Master Protein	Q02241-1	Kinesin-like protein KIF23 [OS=Homo sapiens]	>ProteinCenter:SwissProt|Q02241-1 Kinesin-like protein KIF23 [OS=Homo sapiens]	0	FALSE	109.157	33	26	31	106	5	960	110	8.51	113.35	26	cell division;cell organization and biogenesis;cellular component movement;regulation of biological process;transport	cytoplasm;cytoskeleton;cytosol;nucleus	catalytic activity;motor activity;nucleotide binding;protein binding	Pf00225, Pf02463, Pf03938, Pf05852, Pf11559, Pf12329, Pf15294	9493	ENSG00000137807.13	KIF23	15	MicroRNAs in cancer	COPI-dependent Golgi-to-ER retrograde traffic; Kinesins; MHC class II antigen presentation; Mitotic Telophase/Cytokinesis		16	0.925	0.966	3.911	3.731	1.98	4.837	7.32	14.796	42.3	52	56	130.6	98.5	56.5	163.9	176.1	124.2	3.99428e+07	4.90972e+07	5.29225e+07
High	Master Protein	P23229-1	integrin alpha-6 [OS=Homo sapiens]	>ProteinCenter:SwissProt|P23229-1 integrin alpha-6 [OS=Homo sapiens]	0	FALSE	108.836	28	30	33	133	30	1130	126.5	6.61	141.24	30	cell communication;cell differentiation;cell organization and biogenesis;cellular component movement;regulation of biological process;response to stimulus	cell surface;membrane	metal ion binding;protein binding	Pf01839, Pf08441, Pf13517	3655	ENSG00000091409.14	ITGA6	2	Focal adhesion; Hypertrophic cardiomyopathy (HCM); Hematopoietic cell lineage; Regulation of actin cytoskeleton; Cell adhesion molecules (CAMs); Small cell lung cancer; Pathways in cancer; ECM-receptor interaction; Arrhythmogenic right ventricular cardiomyopathy (ARVC); Toxoplasmosis; PI3K-Akt signaling pathway; Dilated cardiomyopathy	Integrin cell surface interactions; Laminin interactions; Basigin interactions; Assembly of collagen fibrils and other multimeric structures; Type I hemidesmosome assembly; Syndecan interactions	Integrin-mediated Cell Adhesion; Arrhythmogenic Right Ventricular Cardiomyopathy; Alpha 6 Beta 4 signaling pathway; Focal Adhesion; Regulation of Apoptosis by Parathyroid Hormone-related Protein; Focal Adhesion-PI3K-Akt-mTOR-signaling pathway	31	0.727	0.654	2.421	3.021	3.257	1.763	2.345	1.716	54.9	43.8	55.2	114.7	156.1	145	111.6	118.4	100.2	5.95914e+08	4.75946e+08	5.99534e+08
High	Master Protein	P07355	Annexin A2 [OS=Homo sapiens]	>ProteinCenter:SwissProt|P07355 Annexin A2 [OS=Homo sapiens]	0	FALSE	108.696	63	26	31	127	26	339	38.6	7.75	118.36	26	cell organization and biogenesis;metabolic process;regulation of biological process;response to stimulus;transport	cell surface;cytoplasm;cytosol;endoplasmic reticulum;endosome;extracellular;membrane;nucleus;organelle lumen	enzyme regulator activity;metal ion binding;protein binding;RNA binding	Pf00191	302	ENSG00000182718.16	ANXA2	15		Dissolution of Fibrin Clot; Gene and protein expression by JAK-STAT signaling after Interleukin-12 stimulation; Smooth Muscle Contraction; Neutrophil degranulation; Interleukin-12 family signaling	Prostaglandin Synthesis and Regulation	12	0.776	0.606	3.42	6.06	3.012	0.686	1.382	1.21	54.3	42	39	157.4	284	145.2	38.3	72.8	66.9	1.32813e+09	1.02745e+09	9.52767e+08
High	Master Protein	Q99715-1	Collagen alpha-1(XII) chain [OS=Homo sapiens]	>ProteinCenter:SwissProt|Q99715-1 Collagen alpha-1(XII) chain [OS=Homo sapiens]	0	FALSE	108.289	14	36	36	70	36	3063	332.9	5.53	74.19	36	cell differentiation;cell organization and biogenesis;metabolic process	extracellular;organelle lumen	protein binding;structural molecule activity	Pf00041, Pf00092, Pf13519	1303	ENSG00000111799.20	COL12A1	6	Protein digestion and absorption	Collagen degradation; Assembly of collagen fibrils and other multimeric structures; Collagen chain trimerization		8	1.037	0.968	0.076	0.07	0.088	0.02	0.018	0.034	281.6	299.7	310.5	1.7	1.4	1.7	1.1	0.6	1.6	3.55786e+08	3.78664e+08	3.92278e+08
High	Master Protein	P62805	histone H4 [OS=Homo sapiens]	>ProteinCenter:SwissProt|P62805 histone H4 [OS=Homo sapiens]	0	FALSE	106.385	62	15	21	185	15	103	11.4	11.36	207.23	15	cell organization and biogenesis;metabolic process;regulation of biological process;response to stimulus	chromosome;extracellular;membrane;nucleus	DNA binding;protein binding;RNA binding	Pf00125, Pf02969, Pf15630	8359; 8361; 8360; 8363; 8370; 554313; 8365; 8364; 121504; 8367; 8294; 8366; 8362; 8368	ENSG00000197061.4; ENSG00000275126.1; ENSG00000273542.1; ENSG00000197238.4; ENSG00000197837.3; ENSG00000276966.2; ENSG00000158406.4; ENSG00000270882.2; ENSG00000274618.1; ENSG00000278637.1; ENSG00000277157.1; ENSG00000278705.1; ENSG00000270276.2; ENSG00000276180.1	HIST1H4A; HIST1H4F; HIST1H4D; HIST1H4J; HIST2H4A; HIST2H4B; HIST1H4H; HIST1H4C; HIST4H4; HIST1H4E; HIST1H4I; HIST1H4B; HIST1H4K; HIST1H4L	6; 1; 12	Viral carcinogenesis; Systemic lupus erythematosus; Alcoholism	SIRT1 negatively regulates rRNA expression; RMTs methylate histone arginines; Nonhomologous End-Joining (NHEJ); Activation of anterior HOX genes in hindbrain development during early embryogenesis; NoRC negatively regulates rRNA expression; Meiotic synapsis; Transcriptional regulation by small RNAs; Meiotic recombination; PRC2 methylates histones and DNA; Recruitment and ATM-mediated phosphorylat…	Gastric Cancer Network 1; Histone Modifications; Type II interferon signaling (IFNG)	82	0.929	0.77	1.084	1.542	1.548	1.326	1.973	0.684	93.7	83.1	66.3	106.2	96.7	113.7	117.4	163	59.9	9.33555e+09	8.28603e+09	6.60687e+09
High	Master Protein	Q03247	SWISS-PROT:Q03247 (Bos taurus) Apolipoprotein E precursor	>Q03247 SWISS-PROT:Q03247 (Bos taurus) Apolipoprotein E precursor	0	TRUE	103.395	59	20	25	147	17	316	36	5.67	166.34	20	cell organization and biogenesis;metabolic process;regulation of biological process;response to stimulus;transport	extracellular	enzyme regulator activity;protein binding;transporter activity	Pf01442	281004		APOE	18	Alzheimer's disease			1	0.828	1.049	0.663	0.7	0.91	0.159	0.893	0.914	118	104.8	149	68.8	90.9	99.3	25.5	110.3	133.3	3.32453e+09	2.95256e+09	4.19714e+09
High	Master Protein	Q13813	Spectrin alpha chain, non-erythrocytic 1 [OS=Homo sapiens]	>ProteinCenter:SwissProt|Q13813 Spectrin alpha chain, non-erythrocytic 1 [OS=Homo sapiens]	0	FALSE	103.15	14	32	32	67	32	2472	284.4	5.35	73.84	32	cell organization and biogenesis;cellular component movement;metabolic process;regulation of biological process;response to stimulus;transport	cytoplasm;cytoskeleton;cytosol;extracellular;membrane;organelle lumen	metal ion binding;protein binding;structural molecule activity	Pf00018, Pf00036, Pf00435, Pf07653, Pf08239, Pf08726, Pf13405, Pf13499, Pf14604	6709	ENSG00000197694.15	SPTAN1	9	Apoptosis; Tight junction	Interaction between L1 and Ankyrins; Caspase-mediated cleavage of cytoskeletal proteins; NCAM signaling for neurite out-growth; Nephrin family interactions; Neutrophil degranulation; COPI-mediated anterograde transport; RAF/MAP kinase cascade; Interleukin-20 family signaling	Fas Ligand (FasL) pathway and Stress induction of Heat Shock Proteins (HSP) regulation	33	0.729	0.724	12.185	12.782	7.06	4.919	12.949	10.173	12.4	9.4	8.3	158.7	254.3	122.8	60.9	145.8	127.4	9.14128e+06	6.95869e+06	6.12821e+06
High	Master Protein	P78371-1	T-complex protein 1 subunit beta [OS=Homo sapiens]	>ProteinCenter:SwissProt|P78371-1 T-complex protein 1 subunit beta [OS=Homo sapiens]	0	FALSE	102.925	48	24	29	96	24	535	57.5	6.46	85.84	24	cell organization and biogenesis;metabolic process;regulation of biological process;transport	cytoplasm;cytosol;extracellular;organelle lumen	nucleotide binding;protein binding	Pf00118	10576	ENSG00000166226.12	CCT2	12		BBSome-mediated cargo-targeting to cilium; Prefoldin mediated transfer of substrate to CCT/TriC; Cooperation of PDCL (PhLP1) and TRiC/CCT in G-protein beta folding; Association of TriC/CCT with target proteins during biosynthesis; Neutrophil degranulation; Folding of actin by CCT/TriC; Formation of tubulin folding intermediates by CCT/TriC		16	0.956	0.965	0.971	0.909	0.759	1.069	1.318	1.629	95.1	96.3	106.5	84.6	75.7	60	102.4	119.4	159.9	4.17709e+08	4.23014e+08	4.6802e+08
High	Master Protein	Q13509	tubulin beta-3 chain [OS=Homo sapiens]	>ProteinCenter:SwissProt|Q13509 tubulin beta-3 chain [OS=Homo sapiens]	0	FALSE	101.284	40	17	30	167	3	450	50.4	4.93	128.79	17	cell organization and biogenesis;cellular component movement	cytoplasm;cytoskeleton;nucleus	catalytic activity;nucleotide binding;protein binding;structural molecule activity	Pf00091, Pf03953, Pf10644	10381	ENSG00000258947.6	TUBB3	16	Phagosome; Pathogenic Escherichia coli infection; Gap junction	COPI-independent Golgi-to-ER retrograde traffic; COPI-dependent Golgi-to-ER retrograde traffic; Carboxyterminal post-translational modifications of tubulin; Recruitment of NuMA to mitotic centrosomes; Hedgehog 'off' state; Translocation of GLUT4 to the plasma membrane; Prefoldin mediated transfer of substrate to CCT/TriC; Microtubule-dependent trafficking of connexons from Golgi to the plasma mem…	Pathogenic Escherichia coli infection; Parkin-Ubiquitin Proteasomal System pathway; Exercise-induced Circadian Regulation	66	0.777	0.898	0.398	0.271	0.282	0.627	1.627	1.353	155.5	76.9	91.8	63.8	28.9	37.2	108.2	185.1	152.6	1.07637e+07	5.32037e+06	6.35691e+06
High	Master Protein	Q92616	eIF-2-alpha kinase activator GCN1 [OS=Homo sapiens]	>ProteinCenter:SwissProt|Q92616 eIF-2-alpha kinase activator GCN1 [OS=Homo sapiens]	0	FALSE	100.942	15	31	31	59	31	2671	292.6	7.47	58.39	31	cell communication;metabolic process;regulation of biological process;response to stimulus	cytoplasm;cytosol;membrane;ribosome	enzyme regulator activity;protein binding;RNA binding	Pf12074, Pf13646	10985		GCN1L1; GCN1	12				0	0.754	0.906	2.331	1.484	1.367	1.025	1.038	1.342	79.3	55.4	69.7	194.8	124.5	89.3	81.3	83	122.6	6.26395e+07	4.37969e+07	5.50911e+07
High	Master Protein	P02769 sp	SWISS-PROT:P02769 (Bos taurus) Bovine serum albumin precursor	>P02769 SWISS-PROT:P02769 (Bos taurus) Bovine serum albumin precursor >sp|ALBU_BOVIN|	0	TRUE	99.735	31	20	22	145	17	607	69.2	6.18	137.62	20	cell communication;regulation of biological process;response to stimulus;transport	extracellular	DNA binding;metal ion binding	Pf00273	280717		ALB	6	Thyroid hormone synthesis			1	0.492	0.62	0.909	0.39	0.942	0.458	0.265	0.489	159.3	80.1	112.9	126.4	51.2	164.2	75	38.6	92.3	7.31309e+09	3.6753e+09	5.18252e+09
High	Master Protein	Q02241-3	Isoform 3 of Kinesin-like protein KIF23 [OS=Homo sapiens]	>ProteinCenter:SwissProt|Q02241-3 Isoform 3 of Kinesin-like protein KIF23 [OS=Homo sapiens]	0	FALSE	98.013	44	24	28	99	3	673	77.7	7.97	101.45	24	cell organization and biogenesis;cellular component movement;regulation of biological process;transport	cytosol;nucleus	catalytic activity;motor activity;nucleotide binding;protein binding	Pf00225, Pf02463, Pf05852, Pf11559, Pf12329, Pf15294	9493	ENSG00000137807.13	KIF23	15				0	1.137	1.349	4.163	3.353	1.692	6.598	7.637	11.432	20	18.3	31.8	85.1	70.8	39.8	134	148.8	351.3	6.57346e+06	6.01674e+06	1.04353e+07
High	Master Protein	P08727	Keratin, type I cytoskeletal 19 [OS=Homo sapiens]	>ProteinCenter:SwissProt|P08727 Keratin, type I cytoskeletal 19 [OS=Homo sapiens]	0	TRUE	97.716	48	22	27	74	14	400	44.1	5.14	86.35	22	cell death;cell differentiation;cell organization and biogenesis;regulation of biological process;response to stimulus	cytoskeleton;cytosol;membrane	protein binding;structural molecule activity	Pf00038	3880	ENSG00000171345.13	KRT19	17		Formation of the cornified envelope		3	0.744	1.438	14.938	13.934	3.97	1.582	5.9	4.733	36.8	30.7	46.9	300.6	197.2	58.2	38.4	92.3	98.9	4.0069e+07	3.3468e+07	5.10497e+07
High	Master Protein	P04264	Keratin, type II cytoskeletal 1 [OS=Homo sapiens]	>ProteinCenter:SwissProt|P04264 Keratin, type II cytoskeletal 1 [OS=Homo sapiens]	0	FALSE	97.534	35	25	26	93	20	644	66	8.12	107.73	25	cell death;defense response;metabolic process;regulation of biological process;response to stimulus;transport	cytoskeleton;cytosol;extracellular;membrane;nucleus	catalytic activity;motor activity;protein binding;receptor activity;structural molecule activity	Pf00038, Pf01576, Pf05103, Pf05957, Pf12128, Pf13166, Pf13514	3848	ENSG00000167768.4	KRT1	12		Formation of the cornified envelope; Neutrophil degranulation	Corticotropin-releasing hormone signaling pathway	7	1.395	3.123	5.026	11.236	14.912	11.936	7.467	19.557	11.5	20.7	60.5	61.5	101.3	134.7	155.9	81.5	272.4	7.36721e+07	1.33219e+08	3.88917e+08
High	Master Protein	P05783	Keratin, type I cytoskeletal 18 [OS=Homo sapiens]	>ProteinCenter:SwissProt|P05783 Keratin, type I cytoskeletal 18 [OS=Homo sapiens]	0	FALSE	97.294	49	24	29	101	22	430	48	5.45	99.22	24	cell death;cell organization and biogenesis;regulation of biological process;response to stimulus;transport	cytoplasm;cytosol;nucleus	protein binding;RNA binding;structural molecule activity	Pf00038	3875	ENSG00000111057.10	KRT18	12	Pathogenic Escherichia coli infection	Formation of the cornified envelope	Pathogenic Escherichia coli infection	5	0.83	0.906	92.459	49.109	12.667	3.191	9.436	9.986	5.4	3.6	4.5	451.8	262	66.8	15.9	46.6	43.4	4.88771e+07	3.26805e+07	4.09042e+07
High	Master Protein	Q08380	Galectin-3-binding protein [OS=Homo sapiens]	>ProteinCenter:SwissProt|Q08380 Galectin-3-binding protein [OS=Homo sapiens]	0	FALSE	96.441	36	19	20	127	19	585	65.3	5.27	116.4	19	defense response;regulation of biological process;response to stimulus;transport	extracellular;membrane;organelle lumen	protein binding;receptor activity	Pf00530, Pf07707	3959	ENSG00000108679.12	LGALS3BP	17		Platelet degranulation		4	1.061	0.832	0.333	0.229	0.465	1.757	1.304	0.803	110.3	134	107.2	34.7	26.3	49.3	195.1	137.4	105.6	1.4763e+09	1.79294e+09	1.43484e+09
High	Master Protein	Q07954	prolow-density lipoprotein receptor-related protein 1 [OS=Homo sapiens]	>ProteinCenter:SwissProt|Q07954 prolow-density lipoprotein receptor-related protein 1 [OS=Homo sapiens]	0	FALSE	96.376	7	27	29	90	27	4544	504.3	5.39	93.72	27	cell proliferation;development;metabolic process;regulation of biological process;response to stimulus;transport	cytoplasm;cytosol;endosome;membrane;nucleus	metal ion binding;protein binding;receptor activity;RNA binding;transporter activity	Pf00057, Pf00058, Pf07645, Pf12662, Pf14670	4035	ENSG00000123384.13	LRP1	12	Alzheimer's disease; Malaria	Signaling by GPCR; Scavenging of heme from plasma; Retinoid metabolism and transport	Alzheimers Disease; Regulation of Wnt/B-catenin Signaling by Small Molecule Compounds; Statin Pathway	15	1.024	0.79	0.479	0.302	0.782	0.92	0.607	0.432	139.9	153.6	129.4	60.5	35.8	101.5	132.1	84.9	62.3	2.88459e+08	3.16694e+08	2.66748e+08
High	Master Protein	Q7L576-1	cytoplasmic FMR1-interacting protein 1 [OS=Homo sapiens]	>ProteinCenter:SwissProt|Q7L576-1 cytoplasmic FMR1-interacting protein 1 [OS=Homo sapiens]	0	FALSE	94.935	20	25	25	107	7	1253	145.1	6.9	120.28	25	cell differentiation;cell growth;cell organization and biogenesis;development;regulation of biological process;response to stimulus;transport	cytoplasm;cytosol;extracellular;organelle lumen	protein binding;RNA binding	Pf05994, Pf07159	23191	ENSG00000273749.4	CYFIP1	15	RNA transport; Regulation of actin cytoskeleton	Regulation of actin dynamics for phagocytic cup formation; VEGFA-VEGFR2 Pathway; Neutrophil degranulation; RHO GTPases Activate WASPs and WAVEs	Brain-Derived Neurotrophic Factor (BDNF) signaling pathway; G13 Signaling Pathway	16	0.735	0.715	2.792	3.412	2.695	0.605	1.397	0.911	58.5	40	42.3	165.9	236.7	195.2	42.6	68.4	50.2	1.33762e+07	9.14544e+06	9.67252e+06
High	Master Protein	P34955	SWISS-PROT:P34955 (Bos taurus) Alpha-1-antiproteinase precursor	>P34955 SWISS-PROT:P34955 (Bos taurus) Alpha-1-antiproteinase precursor	0	TRUE	94.633	41	23	23	111	23	416	46.1	6.52	134.71	23	regulation of biological process	endoplasmic reticulum;extracellular;Golgi	enzyme regulator activity;protein binding	Pf00079	280699	ENSBTAG00000018843.5	SERPINA1	21	Complement and coagulation cascades	Regulation of Insulin-like Growth Factor (IGF) transport and uptake by Insulin-like Growth Factor Binding Proteins (IGFBPs); Neutrophil degranulation; COPII (Coat Protein 2) Mediated Vesicle Transport; Cargo concentration in the ER; Post-translational protein phosphorylation; Platelet degranulation	Complement and Coagulation Cascades; NRF2 pathway	21	0.483	0.399	0.502	0.273	0.684	0.534	0.195	0.425	195.2	93.5	84.9	97.6	52.4	131.2	108.4	48.7	88.2	4.73218e+09	2.26677e+09	2.05781e+09
High	Master Protein	Q1A7A4	TREMBL:Q1A7A4 (Bos taurus) similar to complement component C5	>Q1A7A4 TREMBL:Q1A7A4 (Bos taurus) similar to complement component C5	0	TRUE	93.792	18	25	25	80	25	1677	188.6	6.65	74.15	25												0	0.77	0.627	0.506	0.44	0.933	0.518	0.471	0.366	150	132.7	135.6	68	53.9	123.6	101.4	67.4	67.5	4.29901e+08	3.80355e+08	3.88834e+08
High	Master Protein	Q9H4B7	tubulin beta-1 chain [OS=Homo sapiens]	>ProteinCenter:SwissProt|Q9H4B7 tubulin beta-1 chain [OS=Homo sapiens]	0	FALSE	92.74	29	12	25	205	1	451	50.3	5.17	172.12	12	cell organization and biogenesis	cytoplasm;cytoskeleton	catalytic activity;nucleotide binding;structural molecule activity	Pf00091, Pf03953	81027	ENSG00000101162.3	TUBB1	20	Phagosome; Pathogenic Escherichia coli infection; Gap junction	COPI-independent Golgi-to-ER retrograde traffic; COPI-dependent Golgi-to-ER retrograde traffic; Carboxyterminal post-translational modifications of tubulin; Recruitment of NuMA to mitotic centrosomes; Hedgehog 'off' state; Translocation of GLUT4 to the plasma membrane; Prefoldin mediated transfer of substrate to CCT/TriC; Microtubule-dependent trafficking of connexons from Golgi to the plasma mem…	Pathogenic Escherichia coli infection; Parkin-Ubiquitin Proteasomal System pathway	65	1.016	1.125	0.398	0.4	0.958	1.101	0.315	0.525	131.6	133.8	148.2	52.3	52.6	126.1	144.9	41.5	69.1	2.44313e+06	2.48327e+06	2.74964e+06
High	Master Protein	P35241-1	radixin [OS=Homo sapiens]	>ProteinCenter:SwissProt|P35241-1 radixin [OS=Homo sapiens]	0	FALSE	92.457	28	21	23	122	7	583	68.5	6.37	147.78	21	cell organization and biogenesis;regulation of biological process;response to stimulus	cytoplasm;cytoskeleton;membrane	protein binding;RNA binding	Pf00373, Pf00769, Pf09379, Pf09380	5962	ENSG00000137710.14	RDX	11	MicroRNAs in cancer; Proteoglycans in cancer; Regulation of actin cytoskeleton	Recycling pathway of L1	Regulation of Actin Cytoskeleton	8	0.671	0.516	0.305	0.55	0.348	0.518	0.884	0.672	155.5	105.4	93.1	45.6	98.7	69.3	80.7	131.3	120.3	7.17927e+07	4.86476e+07	4.29808e+07
High	Master Protein	Q08431	Lactadherin [OS=Homo sapiens]	>ProteinCenter:SwissProt|Q08431 Lactadherin [OS=Homo sapiens]	0	FALSE	92.132	46	17	21	121	17	387	43.1	8.15	110.46	17	cell organization and biogenesis;metabolic process;regulation of biological process	extracellular;membrane;organelle lumen	protein binding	Pf00008, Pf00754	4240		MFGE8	15		Post-translational protein phosphorylation; Regulation of Insulin-like Growth Factor (IGF) transport and uptake by Insulin-like Growth Factor Binding Proteins (IGFBPs); Amyloid fiber formation	Extracellular vesicle-mediated signaling in recipient cells	6	0.87	0.942	0.105	0.113	0.139	0.198	0.195	0.197	228.5	203.7	215	31.4	26.8	36.1	54.7	54.5	49.3	5.45434e+09	4.86345e+09	5.133e+09
High	Master Protein	Q01082-1	Spectrin beta chain, non-erythrocytic 1 [OS=Homo sapiens]	>ProteinCenter:SwissProt|Q01082-1 Spectrin beta chain, non-erythrocytic 1 [OS=Homo sapiens]	0	FALSE	91.749	15	29	29	65	29	2364	274.4	5.57	80.58	29	cell organization and biogenesis;cellular component movement;metabolic process;regulation of biological process;response to stimulus;transport	cytoplasm;cytoskeleton;cytosol;membrane;nucleus	protein binding;RNA binding;structural molecule activity	Pf00169, Pf00307, Pf00435, Pf11971, Pf12128, Pf15410	6711	ENSG00000115306.15	SPTBN1	2		Nephrin family interactions; Interaction between L1 and Ankyrins; COPI-mediated anterograde transport; RAF/MAP kinase cascade; NCAM signaling for neurite out-growth; Interleukin-20 family signaling	TGF-beta Signaling Pathway; Sudden Infant Death Syndrome (SIDS) Susceptibility Pathways	25	0.793	1.077	8.806	10.857	5.771	3.27	7.043	6.942	16.1	6.4	7.2	168.9	233.4	118.5	71.4	150.4	127.6	1.41077e+07	5.6107e+06	6.27798e+06
High	Master Protein	P08195	4F2 cell-surface antigen heavy chain [OS=Homo sapiens]	>ProteinCenter:SwissProt|P08195 4F2 cell-surface antigen heavy chain [OS=Homo sapiens]	0	FALSE	91.577	37	20	21	98	20	630	68	5.01	98.86	20	cell growth;cellular component movement;metabolic process;response to stimulus;transport	cell surface;cytosol;membrane;nucleus	catalytic activity;protein binding;RNA binding;transporter activity	Pf00128	6520	ENSG00000168003.16	SLC3A2	11	mTOR signaling pathway; Protein digestion and absorption	Tryptophan catabolism; Basigin interactions; Amino acid transport across the plasma membrane		13	0.69	0.653	1.478	2.388	1.453	1.029	1.481	1.327	79	55.5	54.1	116.6	174	104.2	88.4	122	106.1	6.71387e+08	4.71897e+08	4.59961e+08
High	Master Protein	P09327	Villin-1 [OS=Homo sapiens]	>ProteinCenter:SwissProt|P09327 Villin-1 [OS=Homo sapiens]	0	FALSE	90.701	31	23	26	85	23	827	92.6	6.39	93.26	23	cell death;cell differentiation;cell organization and biogenesis;cellular component movement;regulation of biological process;response to stimulus;transport	cytoplasm;cytoskeleton;membrane	enzyme regulator activity;metal ion binding;protein binding	Pf00626, Pf02209	7429	ENSG00000127831.10	VIL1	2			Regulation of Actin Cytoskeleton	1	1.251	1.6	13.512	23.464	11.42	13.161	21.869	24.17	9.6	11.8	16.8	118.3	138.9	85.4	124.6	191.4	203.2	4.43257e+07	5.4941e+07	7.81328e+07
High	Master Protein	Q9H0H5	Rac GTPase-activating protein 1 [OS=Homo sapiens]	>ProteinCenter:SwissProt|Q9H0H5 Rac GTPase-activating protein 1 [OS=Homo sapiens]	0	FALSE	89.855	39	23	27	100	23	632	71	8.88	97.78	23	cell differentiation;cell division;cell organization and biogenesis;cell proliferation;cellular component movement;development;metabolic process;regulation of biological process;response to stimulus;transport	cytoplasm;cytoskeleton;cytosol;endosome;membrane;nucleus	catalytic activity;enzyme regulator activity;metal ion binding;nucleotide binding;protein binding	Pf00130, Pf00620, Pf07888	29127	ENSG00000161800.12	RACGAP1	12		COPI-dependent Golgi-to-ER retrograde traffic; Kinesins; Rho GTPase cycle; MHC class II antigen presentation	Signal Transduction of S1P Receptor; Wnt Signaling Pathway and Pluripotency	16	0.768	0.931	3.767	3.245	1.783	4.636	6.172	12.732	22.9	18.2	24	91.1	88.1	44.7	110.2	166.4	334.4	1.87854e+08	1.48718e+08	1.96565e+08
High	Master Protein	P52272	Heterogeneous nuclear ribonucleoprotein M [OS=Homo sapiens]	>ProteinCenter:SwissProt|P52272 Heterogeneous nuclear ribonucleoprotein M [OS=Homo sapiens]	0	FALSE	89.591	32	20	25	74	20	730	77.5	8.7	78.96	20	metabolic process;regulation of biological process;response to stimulus	membrane;nucleus;spliceosomal complex	protein binding;RNA binding	Pf00076, Pf11532, Pf11608, Pf13893, Pf14259	4670	ENSG00000099783.11	HNRNPM	19	Spliceosome	mRNA Splicing - Major Pathway; FGFR2 alternative splicing	mRNA Processing	11	0.603	0.932	9.743	2.679	1.104	3.404	3.586	4.016	31.4	21	29.9	283.9	89.1	59.6	119.1	120.6	145.5	4.63501e+07	3.09565e+07	4.41669e+07
High	Master Protein	P15924-1	Desmoplakin [OS=Homo sapiens]	>ProteinCenter:SwissProt|P15924-1 Desmoplakin [OS=Homo sapiens]	0	FALSE	89.058	12	29	29	56	29	2871	331.6	6.81	61.79	29	cell death;cell differentiation;cell organization and biogenesis;metabolic process;regulation of biological process;response to stimulus;transport	cytoplasm;cytoskeleton;membrane;nucleus	catalytic activity;motor activity;protein binding;RNA binding;structural molecule activity	Pf00038, Pf00681, Pf01540, Pf01576, Pf02463, Pf04111, Pf04156, Pf05483, Pf05557, Pf05622, Pf06008, Pf06160, Pf06637, Pf07888, Pf10174, Pf12072, Pf12128, Pf13166	1832	ENSG00000096696.13	DSP	6	Arrhythmogenic right ventricular cardiomyopathy (ARVC)	Apoptotic cleavage of cell adhesion proteins; Formation of the cornified envelope; Neutrophil degranulation	Arrhythmogenic Right Ventricular Cardiomyopathy; Lung fibrosis	14	0.848	1.729	7.831	9.274	6.032	2.6	3.834	6.428	13.6	12.3	27.7	185	235.4	123	59.7	74.3	168.8	1.07402e+07	9.7436e+06	2.18582e+07
High	Master Protein	O95819-6	Isoform 6 of Mitogen-activated protein kinase kinase kinase kinase 4 [OS=Homo sapiens]	>ProteinCenter:SwissProt|O95819-6 Isoform 6 of Mitogen-activated protein kinase kinase kinase kinase 4 [OS=Homo sapiens]	0	FALSE	89.056	22	26	27	85	13	1273	144.9	7.49	92.83	26	cell organization and biogenesis;metabolic process;regulation of biological process;response to stimulus	cytoplasm	catalytic activity;nucleotide binding;protein binding;signal transducer activity	Pf00069, Pf00780, Pf07714	9448	ENSG00000071054.16	MAP4K4	2			MAPK Signaling Pathway; Angiopoietin Like Protein 8 Regulatory Pathway; Insulin Signaling	3	0.814	0.896	0.658	0.683	0.665	5.549	3.347	2.615	54.8	41.7	46.5	31.9	33.1	35	247.2	264.3	145.6	2.86656e+07	2.1779e+07	2.43012e+07
High	Master Protein	Q3SX09	TREMBL:Q3SX09 (Bos taurus) similar to HBG protein	>Q3SX09 TREMBL:Q3SX09 (Bos taurus) similar to HBG protein	0	TRUE	88.281	57	12	16	288	8	201	22	9.39	257.12	12												0	0.975	0.912	0.81	0.828	1.426	0.66	1.197	0.622	121.9	115.2	125.3	81.5	72.6	116.4	87.9	98.8	80.4	9.71616e+09	9.18582e+09	9.99174e+09
High	Master Protein	P07814	Bifunctional glutamate/proline--tRNA ligase [OS=Homo sapiens]	>ProteinCenter:SwissProt|P07814 Bifunctional glutamate/proline--tRNA ligase [OS=Homo sapiens]	0	FALSE	87.085	18	24	24	57	24	1512	170.5	7.33	72.41	24	cell organization and biogenesis;metabolic process;regulation of biological process;response to stimulus	cytoplasm;cytosol;membrane	catalytic activity;metal ion binding;nucleotide binding;protein binding;RNA binding	Pf00458, Pf00587, Pf00749, Pf01406, Pf03129, Pf03950, Pf09180, Pf14497	2058	ENSG00000136628.17	EPRS	1	Metabolic pathways; Porphyrin and chlorophyll metabolism; Aminoacyl-tRNA biosynthesis	tRNA modification in the nucleus and cytosol; Cytosolic tRNA aminoacylation; SeMet incorporation into proteins	Parkinsons Disease Pathway; Amino Acid metabolism	16	0.828	0.874	1.755	1.269	1.123	1.334	1.607	1.539	70.8	61	69.9	132.5	112.8	84.2	106.3	140.5	121.9	8.06685e+07	6.95261e+07	7.97002e+07
High	Master Protein	Q8N4C8-1	Misshapen-like kinase 1 [OS=Homo sapiens]	>ProteinCenter:SwissProt|Q8N4C8-1 Misshapen-like kinase 1 [OS=Homo sapiens]	0	FALSE	86.863	18	24	25	87	12	1332	149.7	7.85	105.01	24	cell communication;cell organization and biogenesis;development;metabolic process;regulation of biological process;response to stimulus	cytoplasm;cytosol;Golgi;membrane	catalytic activity;nucleotide binding;protein binding;signal transducer activity	Pf00069, Pf00780, Pf07714, Pf14531	50488	ENSG00000141503.15	MINK1	17		Oxidative Stress Induced Senescence	MAPK Signaling Pathway; Angiopoietin Like Protein 8 Regulatory Pathway; Insulin Signaling	7	0.833	1.13	1.402	1.414	1.434	3.133	2.796	1.645	43.3	43.3	49.1	115.6	155.7	107.2	149.2	138.3	98.4	4.14649e+07	4.14806e+07	4.70361e+07
High	Master Protein	Q1RMK2	TREMBL:Q1RMK2 (Bos taurus) IGHM protein	>Q1RMK2 TREMBL:Q1RMK2 (Bos taurus) IGHM protein	0	TRUE	86.832	28	14	18	160	14	597	65	5.97	100.53	14				Pf07654								0	0.919	0.793	0.558	0.479	0.694	0.737	0.647	0.52	134.7	131.2	117.3	74.3	64.4	97.9	116.3	82.4	81.4	3.12576e+09	3.04334e+09	2.72189e+09
High	Master Protein	Q9H4M9	EH domain-containing protein 1 [OS=Homo sapiens]	>ProteinCenter:SwissProt|Q9H4M9 EH domain-containing protein 1 [OS=Homo sapiens]	0	FALSE	86.554	34	21	21	104	11	534	60.6	6.83	99.78	21	cell organization and biogenesis;coagulation;regulation of biological process;response to stimulus;transport	endosome;membrane	metal ion binding;nucleotide binding;protein binding	Pf00350, Pf01926, Pf12763	10938	ENSG00000110047.17	EHD1	11	Endocytosis	Factors involved in megakaryocyte development and platelet production	Insulin Signaling	4	0.949	0.854	1.647	2.52	2.323	0.946	0.894	1.094	76.5	59.2	66.8	140.8	183.6	160.8	63	66.2	83.2	1.03205e+08	7.98274e+07	9.00636e+07
High	Master Protein	Q14697-1	Neutral alpha-glucosidase AB [OS=Homo sapiens]	>ProteinCenter:SwissProt|Q14697-1 Neutral alpha-glucosidase AB [OS=Homo sapiens]	0	FALSE	85.888	29	22	22	76	22	944	106.8	6.14	73.3	22	metabolic process	endoplasmic reticulum;Golgi;membrane;organelle lumen	catalytic activity;RNA binding	Pf01055, Pf13802	23193	ENSG00000089597.16	GANAB	11	Protein processing in endoplasmic reticulum; N-Glycan biosynthesis; Metabolic pathways	Calnexin/calreticulin cycle		8	0.958	1.032	1.872	1.769	1.134	0.645	1.098	0.91	86.7	85.6	93.6	169.5	150.9	99.6	52.5	90.2	71.4	2.16784e+08	2.14121e+08	2.34008e+08
High	Master Protein	Q14517	Protocadherin Fat 1 [OS=Homo sapiens]	>ProteinCenter:SwissProt|Q14517 Protocadherin Fat 1 [OS=Homo sapiens]	0	FALSE	85.878	8	28	28	64	28	4588	506	5	67.09	28	cell communication;cell organization and biogenesis;cellular component movement	cell surface;cytoplasm;membrane;nucleus	metal ion binding;protein binding	Pf00008, Pf00028, Pf00054, Pf02210, Pf05444, Pf06247, Pf07645, Pf12947, Pf13385	2195	ENSG00000083857.13	FAT1	4			Primary Focal Segmental Glomerulosclerosis FSGS	1	1.126	0.999	0.348	0.311	0.382	0.277	0.217	0.171	183	206.1	214.3	61.4	52.9	66	52.9	29.3	34	1.92693e+08	2.17024e+08	2.25646e+08
High	Master Protein	Q9UKE5-1	Traf2 and NCK-interacting protein kinase [OS=Homo sapiens]	>ProteinCenter:SwissProt|Q9UKE5-1 Traf2 and NCK-interacting protein kinase [OS=Homo sapiens]	0	FALSE	85.596	17	25	28	80	12	1360	154.8	7.17	84.72	25	cell organization and biogenesis;metabolic process;regulation of biological process;response to stimulus	cytoplasm;cytoskeleton;cytosol;endosome;membrane;nucleus	catalytic activity;nucleotide binding;protein binding;signal transducer activity	Pf00069, Pf00780, Pf07714, Pf14531	23043	ENSG00000154310.16	TNIK	3		Oxidative Stress Induced Senescence		4	0.818	1.133	1.442	1.473	1.802	7.427	5.71	4.201	43.1	42	50.3	49.5	65.3	68.8	228.8	227.4	124.7	2.64553e+07	2.57544e+07	3.08674e+07
High	Master Protein	Q8WUJ3-1	Cell migration-inducing and hyaluronan-binding protein [OS=Homo sapiens]	>ProteinCenter:SwissProt|Q8WUJ3-1 Cell migration-inducing and hyaluronan-binding protein [OS=Homo sapiens]	0	FALSE	84.549	21	25	28	59	25	1361	152.9	7.85	57.81	25	metabolic process;regulation of biological process	cytoplasm;endoplasmic reticulum;extracellular;membrane;nucleus	catalytic activity;protein binding	Pf10162, Pf13330	57214	ENSG00000103888.16	KIAA1199; CEMIP	15		Hyaluronan biosynthesis and export		5	1.096	1.056	1.892	1.256	2.891	46.578	33.887	27.861	4.6	5.4	4.8	10.6	6.8	27.1	344.3	288.4	208	1.43727e+07	1.69068e+07	1.51437e+07
High	Master Protein	P04075	fructose-bisphosphate aldolase A [OS=Homo sapiens]	>ProteinCenter:SwissProt|P04075 fructose-bisphosphate aldolase A [OS=Homo sapiens]	0	FALSE	84.427	58	19	20	79	19	364	39.4	8.09	77.73	19	cell organization and biogenesis;cellular homeostasis;metabolic process;regulation of biological process;transport	cytoplasm;cytoskeleton;cytosol;extracellular;membrane;nucleus;organelle lumen	catalytic activity;protein binding;RNA binding	Pf00274	226	ENSG00000149925.17	ALDOA	16	HIF-1 signaling pathway; Glycolysis / Gluconeogenesis; Carbon metabolism; Metabolic pathways; Pentose phosphate pathway; Biosynthesis of amino acids; Fructose and mannose metabolism	Platelet degranulation ; Gluconeogenesis; Glycolysis; Neutrophil degranulation	Glycolysis and Gluconeogenesis; Sudden Infant Death Syndrome (SIDS) Susceptibility Pathways	21	0.718	0.841	1.693	2.212	1.186	0.723	1.441	1.536	72.4	65.4	84.5	116.9	160.3	79.4	61.6	117.3	142.2	3.7488e+08	3.38655e+08	4.37395e+08
High	Master Protein	Q3ZBS7	TREMBL:Q3ZBS7 (Bos taurus) Vitronectin	>Q3ZBS7 TREMBL:Q3ZBS7 (Bos taurus) Vitronectin	0	TRUE	84.144	26	13	15	247	13	484	54.1	6.16	189.48	13												0	1.021	0.76	0.543	0.522	0.975	0.978	0.825	0.735	133.5	112.4	103.7	73	62.7	111.2	119.1	98.5	86.1	5.05055e+09	4.25441e+09	3.9226e+09
High	Master Protein	Q13085-1	Acetyl-CoA carboxylase 1 [OS=Homo sapiens]	>ProteinCenter:SwissProt|Q13085-1 Acetyl-CoA carboxylase 1 [OS=Homo sapiens]	0	FALSE	83.863	15	28	28	42	23	2346	265.4	6.37	37.36	28	cell organization and biogenesis;metabolic process;regulation of biological process;response to stimulus;transport	cytoplasm;cytoskeleton;cytosol;mitochondrion	catalytic activity;metal ion binding;nucleotide binding;protein binding	Pf00289, Pf00364, Pf01039, Pf02222, Pf02655, Pf02785, Pf02786, Pf07478, Pf08326, Pf13535, Pf15632	31	ENSG00000278540.4; ENSG00000275176.4	ACACA	17; CHR_HSCHR17_7_CTG4	Fatty acid biosynthesis; Propanoate metabolism; Fatty acid metabolism; Glucagon signaling pathway; Insulin signaling pathway; Metabolic pathways; AMPK signaling pathway; Pyruvate metabolism	Fatty acyl-CoA biosynthesis; Import of palmitoyl-CoA into the mitochondrial matrix; Activation of gene expression by SREBF (SREBP); Defective HLCS causes multiple carboxylase deficiency; ChREBP activates metabolic gene expression; Biotin transport and metabolism	AMP-activated Protein Kinase (AMPK) Signaling; Sterol Regulatory Element-Binding Proteins (SREBP) signalling; Leptin signaling pathway; Corticotropin-releasing hormone signaling pathway; Mesodermal Commitment Pathway; Fatty Acid Biosynthesis; VEGFA-VEGFR2 Signaling Pathway; Focal Adhesion-PI3K-Akt-mTOR-signaling pathway; Leptin and adiponectin	35	0.76	0.74	4.488	3.109	2.455	0.787	0.962	0.714	53.7	33.6	40.4	296.4	205.3	158.3	25.6	52	34.8	2.09455e+07	1.31202e+07	1.57531e+07
High	Master Protein	P12763	SWISS-PROT:P12763 (Bos taurus) Alpha-2-HS-glycoprotein precursor	>P12763 SWISS-PROT:P12763 (Bos taurus) Alpha-2-HS-glycoprotein precursor	0	TRUE	83.566	28	11	14	139	11	359	38.4	5.5	138.93	11	defense response;regulation of biological process;response to stimulus	extracellular;Golgi;membrane	enzyme regulator activity;protein binding	Pf00031	280988	ENSBTAG00000000522.4	AHSG	1		Regulation of Insulin-like Growth Factor (IGF) transport and uptake by Insulin-like Growth Factor Binding Proteins (IGFBPs); Post-translational protein phosphorylation; Neutrophil degranulation; Platelet degranulation		11	0.751	0.813	1.408	0.505	1.565	0.375	0.442	0.748	136.4	107.3	91.2	140.8	57.1	142	50.7	64.2	110.2	8.72025e+09	6.86197e+09	5.8301e+09
High	Master Protein	P60174-1	Isoform 2 of Triosephosphate isomerase [OS=Homo sapiens]	>ProteinCenter:SwissProt|P60174-1 Isoform 2 of Triosephosphate isomerase [OS=Homo sapiens]	0	FALSE	83.25	72	15	16	80	15	249	26.7	6.9	96.91	15	development;metabolic process	cytosol;nucleus	catalytic activity;protein binding	Pf00121	7167	ENSG00000111669.14	TPI1	12			Fatty Acid Beta Oxidation; Cori Cycle; Glycolysis and Gluconeogenesis	3	0.709	0.735	3.208	3.442	1.98	1.669	3.759	3.338	46	31.6	37.4	123.8	170.6	93.5	77	153.7	166.5	2.43018e+08	1.67176e+08	1.97463e+08
High	Master Protein	Q28194	TREMBL:Q28194 (Bos taurus) Thrombospondin-1	>Q28194 TREMBL:Q28194 (Bos taurus) Thrombospondin-1	0	TRUE	82.997	18	22	24	99	5	1170	129.3	4.94	79.42	22												0	0.847	0.756	0.279	0.22	0.305	0.37	0.314	0.338	189.8	160	190.9	58.6	44.1	63.8	68.4	58.9	65.4	2.51791e+08	2.12328e+08	2.53314e+08
High	Master Protein	P39060-1	Isoform 2 of Collagen alpha-1(XVIII) chain [OS=Homo sapiens]	>ProteinCenter:SwissProt|P39060-1 Isoform 2 of Collagen alpha-1(XVIII) chain [OS=Homo sapiens]	0	FALSE	82.942	12	16	18	107	16	1519	153.9	5.68	113.46	16	cell organization and biogenesis;metabolic process;regulation of biological process;response to stimulus	extracellular;organelle lumen	metal ion binding;structural molecule activity	Pf01391, Pf06121, Pf06482, Pf13385	80781	ENSG00000182871.14	COL18A1	21				0	0.707	0.919	0.039	0.066	0.062	0.105	0.238	0.363	257.6	200.6	243.4	9.3	12.9	11	27	46.3	91.9	3.34118e+09	2.60169e+09	3.15725e+09
High	Master Protein	P07996	thrombospondin-1 [OS=Homo sapiens]	>ProteinCenter:SwissProt|P07996 thrombospondin-1 [OS=Homo sapiens]	0	FALSE	82.482	17	21	23	90	4	1170	129.3	4.94	73.72	21	cell organization and biogenesis;cellular component movement;defense response;metabolic process;regulation of biological process;response to stimulus;transport	cell surface;cytoplasm;endoplasmic reticulum;extracellular;organelle lumen	metal ion binding;protein binding	Pf00090, Pf00093, Pf02412, Pf05735, Pf12947	7057	ENSG00000137801.10	THBS1	15	Proteoglycans in cancer; Rap1 signaling pathway; ECM-receptor interaction; Focal adhesion; TGF-beta signaling pathway; p53 signaling pathway; Malaria; Phagosome; PI3K-Akt signaling pathway; MicroRNAs in cancer; Bladder cancer	Platelet degranulation ; Integrin cell surface interactions; RUNX1 regulates genes involved in megakaryocyte differentiation and platelet function; Defective B3GALTL causes Peters-plus syndrome (PpS); O-glycosylation of TSR domain-containing proteins; Signaling by PDGF; Syndecan interactions	Bladder Cancer; Apoptosis-related network due to altered Notch3 in ovarian cancer; miRNA targets in ECM and membrane receptors; Focal Adhesion; TGF-beta Signaling Pathway; Focal Adhesion-PI3K-Akt-mTOR-signaling pathway; Inflammatory Response Pathway; TGF-beta Receptor Signaling; Senescence and Autophagy in Cancer	44	0.821	0.707	0.244	0.158	0.304	0.431	0.444	0.574	176.9	160.8	151.9	34.8	24.5	45.9	83.9	88.2	133.2	6.32016e+07	5.74424e+07	5.42655e+07
High	Master Protein	P55072	Transitional endoplasmic reticulum ATPase [OS=Homo sapiens]	>ProteinCenter:SwissProt|P55072 Transitional endoplasmic reticulum ATPase [OS=Homo sapiens]	0	FALSE	81.903	32	23	24	62	23	806	89.3	5.26	60.1	23	cell communication;cell organization and biogenesis;metabolic process;regulation of biological process;response to stimulus;transport	cytoplasm;cytosol;endoplasmic reticulum;extracellular;membrane;nucleus;organelle lumen;proteasome	catalytic activity;enzyme regulator activity;nucleotide binding;protein binding;RNA binding	Pf00004, Pf00910, Pf01057, Pf01078, Pf02359, Pf02933, Pf05496, Pf05673, Pf06068, Pf07724, Pf07726, Pf07728, Pf09336, Pf13191, Pf13207, Pf13401	7415	ENSG00000165280.15	VCP	9	Protein processing in endoplasmic reticulum; Legionellosis	Protein methylation; Translesion Synthesis by POLH; N-glycan trimming in the ER and Calnexin/Calreticulin cycle; Josephin domain DUBs; Ovarian tumor domain proteases; ABC-family proteins mediated transport; HSF1 activation; Hh mutants that don't undergo autocatalytic processing are degraded by ERAD; E3 ubiquitin ligases ubiquitinate target proteins; Neutrophil degranulation; Defective CFTR causes…		35	1.014	1.009	2.499	3.288	2.211	1.367	2.603	2.667	60.1	50.8	61.5	126	151.6	81.9	80.6	137.6	150	9.48493e+07	8.01671e+07	9.71345e+07
High	Master Protein	O15230	Laminin subunit alpha-5 [OS=Homo sapiens]	>ProteinCenter:SwissProt|O15230 Laminin subunit alpha-5 [OS=Homo sapiens]	0	FALSE	81.703	8	25	25	66	25	3695	399.5	7.02	83.09	25	cell differentiation;cell organization and biogenesis;cell proliferation;cellular component movement;regulation of biological process;response to stimulus;transport	extracellular;membrane;nucleus	catalytic activity;motor activity;protein binding;structural molecule activity	Pf00052, Pf00053, Pf00054, Pf00055, Pf00529, Pf01576, Pf02210, Pf06008, Pf06009, Pf12795, Pf13514, Pf13747	3911	ENSG00000130702.15	LAMA5	20	Amoebiasis; PI3K-Akt signaling pathway; Toxoplasmosis; ECM-receptor interaction; Focal adhesion; Pathways in cancer; Metabolic pathways; Small cell lung cancer	ECM proteoglycans; Laminin interactions; Degradation of the extracellular matrix; MET activates PTK2 signaling; Interleukin-4 and 13 signaling; Non-integrin membrane-ECM interactions	Alpha 6 Beta 4 signaling pathway; Primary Focal Segmental Glomerulosclerosis FSGS; Focal Adhesion; Focal Adhesion-PI3K-Akt-mTOR-signaling pathway; Inflammatory Response Pathway	27	0.859	0.892	0.435	0.52	0.543	0.079	0.13	0.059	196.3	170.5	207.2	74	99.8	111.9	8.1	23	9.1	1.61865e+08	1.40601e+08	1.70886e+08
High	Master Protein	Q9TRI1	TREMBL:Q9TRI1 (Bos taurus) similar to inter-alpha-trypsin inhibitor heavy chain2	>Q9TRI1 TREMBL:Q9TRI1 (Bos taurus) similar to inter-alpha-trypsin inhibitor heavy chain2	0	TRUE	80.821	20	19	20	83	19	946	106.1	7.94	78.57	19												0	1.068	0.977	0.406	0.268	0.504	0.629	0.36	0.624	155.3	178.6	165.2	46.7	35.8	67.5	101	52	97.8	2.40348e+09	2.76394e+09	2.55578e+09
High	Master Protein	P63104	14-3-3 protein zeta/delta [OS=Homo sapiens]	>ProteinCenter:SwissProt|P63104 14-3-3 protein zeta/delta [OS=Homo sapiens]	0	FALSE	80.008	49	16	19	92	12	245	27.7	4.79	114.61	16	cell organization and biogenesis;metabolic process;regulation of biological process;response to stimulus;transport	cytoplasm;cytosol;membrane;mitochondrion;nucleus	catalytic activity;protein binding;RNA binding	Pf00244	7534	ENSG00000164924.17	YWHAZ	8	Hepatitis B; Cell cycle; Epstein-Barr virus infection; Viral carcinogenesis; Oocyte meiosis; PI3K-Akt signaling pathway; Hippo signaling pathway; Pathogenic Escherichia coli infection	Chk1/Chk2(Cds1) mediated inactivation of Cyclin B:Cdk1 complex; Interleukin-3, 5 and GM-CSF signaling; KSRP (KHSRP) binds and destabilizes mRNA; Activation of BAD and translocation to mitochondria ; GP1b-IX-V activation signalling; Translocation of GLUT4 to the plasma membrane; Rap1 signalling; Deactivation of the beta-catenin transactivating complex; TP53 Regulates Metabolic Genes; RHO GTPases a…	Cell Cycle; Prolactin Signaling Pathway; Pathogenic Escherichia coli infection; Myometrial Relaxation and Contraction Pathways; Calcium Regulation in the Cardiac Cell; Sudden Infant Death Syndrome (SIDS) Susceptibility Pathways	51	0.783	0.565	1.738	7.518	3.908	0.744	3.366	0.915	65.8	60.7	69.2	96.3	228.1	130.4	48.8	106.7	94	2.73161e+08	2.52166e+08	2.87223e+08
High	Master Protein	P60842	Eukaryotic initiation factor 4A-I [OS=Homo sapiens]	>ProteinCenter:SwissProt|P60842 Eukaryotic initiation factor 4A-I [OS=Homo sapiens]	0	FALSE	79.648	40	14	16	71	8	406	46.1	5.48	81.53	14	metabolic process;regulation of biological process	cytoplasm;cytosol;membrane;nucleus	catalytic activity;DNA binding;nucleotide binding;protein binding;RNA binding	Pf00270, Pf00271, Pf04851	1973	ENSG00000161960.14	EIF4A1	17	RNA transport	ISG15 antiviral mechanism; L13a-mediated translational silencing of Ceruloplasmin expression; Translation initiation complex formation; GTP hydrolysis and joining of the 60S ribosomal subunit; Deadenylation of mRNA; Ribosomal scanning and start codon recognition	Translation Factors; Interferon type I signaling pathways	20	0.885	0.937	2.513	1.546	0.953	1.279	1.632	2.227	61	53.7	53.2	180.2	120.7	73.3	84.8	121.1	152.1	9.32244e+07	8.19537e+07	8.13269e+07
High	Master Protein	Q14160	protein scribble homolog [OS=Homo sapiens]	>ProteinCenter:SwissProt|Q14160 protein scribble homolog [OS=Homo sapiens]	0	FALSE	79.589	18	23	24	63	20	1630	174.8	5.07	64.83	23	cell communication;cell death;cell differentiation;cell organization and biogenesis;cell proliferation;cellular component movement;development;metabolic process;regulation of biological process;response to stimulus;transport	cytoplasm;membrane	catalytic activity;protein binding	Pf00595, Pf12799, Pf13180, Pf13855, Pf14580	23513		SCRIB	8	Viral carcinogenesis; Hippo signaling pathway	Asymmetric localization of PCP proteins	Human Thyroid Stimulating Hormone (TSH) signaling pathway	8	0.818	0.947	4.876	6.18	3.871	1.809	2.551	2.978	29.9	29.5	32.9	165.5	254	147.9	57.1	77	106.2	2.41223e+07	2.37854e+07	2.65721e+07
High	Master Protein	P35580	Myosin-10 [OS=Homo sapiens]	>ProteinCenter:SwissProt|P35580 Myosin-10 [OS=Homo sapiens]	0	FALSE	78.879	10	21	21	74	13	1976	228.9	5.54	78.93	21	cell organization and biogenesis;cellular component movement;metabolic process;regulation of biological process;transport	cytoplasm;cytosol;nucleus	catalytic activity;motor activity;nucleotide binding;protein binding;transporter activity	Pf00063, Pf00769, Pf01496, Pf01576, Pf02736, Pf04111, Pf05622, Pf05911, Pf06637, Pf07888, Pf09726, Pf12128, Pf13094, Pf13514	4628	ENSG00000133026.12	MYH10	17	Regulation of actin cytoskeleton; Tight junction; Salmonella infection	RHO GTPases activate PAKs; EPHA-mediated growth cone collapse; RHO GTPases Activate ROCKs; Sema4D induced cell migration and growth-cone collapse; RHO GTPases activate CIT; RHO GTPases activate PKNs	Regulation of Actin Cytoskeleton	18	0.632	0.864	0.859	0.864	0.966	2.74	4.132	4.736	88.2	87.5	93.9	66.4	39.8	72.6	129.6	110.6	211.4	2.6494e+08	2.62663e+08	2.82124e+08
High	Master Protein	Q3T052	TREMBL:Q3T052;Q5EA67 (Bos taurus) Inter-alpha (Globulin) inhibitor H4	>Q3T052 TREMBL:Q3T052;Q5EA67 (Bos taurus) Inter-alpha (Globulin) inhibitor H4	0	TRUE	78.324	22	21	23	96	21	916	101.4	6.68	93.35	21	defense response;metabolic process;regulation of biological process;response to stimulus	extracellular	enzyme regulator activity	Pf00092, Pf06668, Pf08487, Pf13519, Pf13768	513700		ITIH4	22				0	0.946	0.865	0.859	0.35	0.849	0.435	0.308	0.739	144.9	138.6	131	112.2	41.5	113.3	66.4	43.8	108.2	8.85229e+08	8.46883e+08	8.00389e+08
High	Master Protein	P17987	T-complex protein 1 subunit alpha [OS=Homo sapiens]	>ProteinCenter:SwissProt|P17987 T-complex protein 1 subunit alpha [OS=Homo sapiens]	0	FALSE	78.284	36	18	19	89	18	556	60.3	6.11	96.94	18	cell organization and biogenesis;metabolic process;regulation of biological process;response to stimulus;transport	cytoplasm;cytoskeleton;cytosol;Golgi	nucleotide binding;protein binding;RNA binding	Pf00118	6950	ENSG00000120438.11	TCP1	6		BBSome-mediated cargo-targeting to cilium; Prefoldin mediated transfer of substrate to CCT/TriC; Gene and protein expression by JAK-STAT signaling after Interleukin-12 stimulation; Cooperation of PDCL (PhLP1) and TRiC/CCT in G-protein beta folding; Association of TriC/CCT with target proteins during biosynthesis; Folding of actin by CCT/TriC; Formation of tubulin folding intermediates by CCT/TriC…		18	0.842	0.754	1.007	1.002	0.733	0.995	1.466	1.403	94.8	83.6	77.1	97.2	94.3	69.5	94.2	152.1	137.3	3.29094e+08	2.90159e+08	2.67711e+08
High	Master Protein	P00558	phosphoglycerate kinase 1 [OS=Homo sapiens]	>ProteinCenter:SwissProt|P00558 phosphoglycerate kinase 1 [OS=Homo sapiens]	0	FALSE	77.967	65	21	22	81	21	417	44.6	8.1	85.91	21	cell differentiation;metabolic process;regulation of biological process;response to stimulus	cytoplasm;cytosol;membrane	catalytic activity;nucleotide binding;protein binding	Pf00162	5230	ENSG00000102144.13	PGK1	X	Biosynthesis of amino acids; HIF-1 signaling pathway; Metabolic pathways; Carbon metabolism; Glycolysis / Gluconeogenesis	Gluconeogenesis; Glycolysis	Cori Cycle; Photodynamic therapy-induced HIF-1 survival signaling; Glycolysis and Gluconeogenesis	13	1.042	1.044	2.244	2.611	1.796	1.557	1.302	2.534	64.9	71	62.4	140.1	135.3	116.2	85.6	87.9	136.6	4.39788e+08	4.81361e+08	4.22562e+08
High	Master Protein	P49368-1	T-complex protein 1 subunit gamma [OS=Homo sapiens]	>ProteinCenter:SwissProt|P49368-1 T-complex protein 1 subunit gamma [OS=Homo sapiens]	0	FALSE	77.876	33	16	19	93	16	545	60.5	6.49	104.51	16	cell organization and biogenesis;metabolic process;regulation of biological process;transport	cytoplasm;cytoskeleton;cytosol;membrane	nucleotide binding;protein binding;RNA binding	Pf00118	7203	ENSG00000163468.14	CCT3	1		BBSome-mediated cargo-targeting to cilium; Prefoldin mediated transfer of substrate to CCT/TriC; Cooperation of PDCL (PhLP1) and TRiC/CCT in G-protein beta folding; Association of TriC/CCT with target proteins during biosynthesis; Formation of tubulin folding intermediates by CCT/TriC; Folding of actin by CCT/TriC		13	0.987	0.908	0.644	0.945	0.864	0.99	1.151	1.348	93	107.7	108.1	74.8	72.1	61	112.9	120.6	149.8	2.68825e+08	3.11365e+08	3.12659e+08
High	Master Protein	P06576	ATP synthase subunit beta, mitochondrial [OS=Homo sapiens]	>ProteinCenter:SwissProt|P06576 ATP synthase subunit beta, mitochondrial [OS=Homo sapiens]	0	FALSE	76.705	45	16	17	54	16	529	56.5	5.4	48.26	16	cell differentiation;cell organization and biogenesis;cellular homeostasis;metabolic process;regulation of biological process;transport	cell surface;membrane;mitochondrion;nucleus;organelle lumen	catalytic activity;nucleotide binding;protein binding;transporter activity	Pf00006, Pf00306, Pf02874	506	ENSG00000110955.8	ATP5B	12	Metabolic pathways; Parkinson's disease; Oxidative phosphorylation; Huntington's disease; Alzheimer's disease	Transcriptional activation of mitochondrial biogenesis; Cristae formation; Mitochondrial protein import; Formation of ATP by chemiosmotic coupling	Electron Transport Chain; Oxidative phosphorylation	17	1.271	1.459	12.28	11.164	0.519	0.935	3.838	4.025	23.1	28.6	39.1	299.2	276.2	11.1	21.5	92.9	108.4	3.81517e+07	4.72665e+07	6.45484e+07
High	Master Protein	P17697	SWISS-PROT:P17697 (Bos taurus) Clusterin precursor	>P17697 SWISS-PROT:P17697 (Bos taurus) Clusterin precursor	0	TRUE	76.073	28	13	17	85	13	439	51.1	6.04	105.81	13	metabolic process;regulation of biological process;response to stimulus	cytoplasm;cytosol;endoplasmic reticulum;extracellular;membrane;mitochondrion;nucleus	catalytic activity;protein binding	Pf01093	280750	ENSBTAG00000005574.4	CLU	8	Complement and coagulation cascades	Platelet degranulation ; Terminal pathway of complement; Antimicrobial peptides; Regulation of Complement cascade	Complement and Coagulation Cascades	12	0.999	1.06	0.62	0.553	1.554	0.733	0.662	0.521	139.1	154.8	157.4	61.8	45	105.8	89.6	73.6	73	1.84933e+09	2.05821e+09	2.09203e+09
High	Master Protein	P38646	Stress-70 protein, mitochondrial [OS=Homo sapiens]	>ProteinCenter:SwissProt|P38646 Stress-70 protein, mitochondrial [OS=Homo sapiens]	0	FALSE	75.625	26	17	19	54	17	679	73.6	6.16	55.42	17	cell differentiation;cell organization and biogenesis;metabolic process;regulation of biological process;response to stimulus	cytoplasm;mitochondrion;nucleus;organelle lumen	nucleotide binding;protein binding;RNA binding	Pf00012, Pf06723	3313	ENSG00000113013.12	HSPA9	5	Tuberculosis; RNA degradation	Gene and protein expression by JAK-STAT signaling after Interleukin-12 stimulation; Mitochondrial protein import; Regulation of HSF1-mediated heat shock response; Interleukin-12 family signaling; Cristae formation	Parkin-Ubiquitin Proteasomal System pathway	17	0.961	1.317	11.222	9.653	0.574	1.446	5.727	6.043	54.2	35.1	36.9	219.5	179.1	30	56.1	146.4	142.7	9.83504e+07	6.36523e+07	6.68479e+07
High	Master Protein	Q15058	Kinesin-like protein KIF14 [OS=Homo sapiens]	>ProteinCenter:SwissProt|Q15058 Kinesin-like protein KIF14 [OS=Homo sapiens]	0	FALSE	75.088	16	23	23	53	23	1648	186.4	7.91	65.15	23	cell division;cell organization and biogenesis;cell proliferation;cellular component movement;metabolic process;regulation of biological process	cytoplasm;cytoskeleton;cytosol;membrane;nucleus	catalytic activity;motor activity;nucleotide binding;protein binding	Pf00225, Pf00498, Pf00769, Pf01576, Pf02463, Pf02841, Pf05262, Pf05622, Pf09726, Pf09731, Pf11068, Pf11740, Pf12128, Pf13514, Pf13868	9928	ENSG00000118193.11	KIF14	1		RHO GTPases activate CIT		4	0.54	0.766	4.576	4.44	2.07	7.461	13.929	31.792	59.8	41.8	54.6	54.9	61.7	37.3	95.9	169.4	324.7	1.47728e+08	1.03324e+08	1.34883e+08
High	Master Protein	O95239-1	Chromosome-associated kinesin KIF4A [OS=Homo sapiens]	>ProteinCenter:SwissProt|O95239-1 Chromosome-associated kinesin KIF4A [OS=Homo sapiens]	0	FALSE	74.955	20	24	25	50	24	1232	139.8	6.27	53.07	24	cell organization and biogenesis;cellular component movement;metabolic process;transport	chromosome;cytoplasm;cytoskeleton;cytosol;membrane;nucleus	catalytic activity;DNA binding;metal ion binding;motor activity;nucleotide binding;protein binding	Pf00225, Pf04111, Pf05033, Pf06156, Pf06785, Pf07888, Pf09731, Pf12128	24137	ENSG00000090889.11	KIF4A	X		COPI-dependent Golgi-to-ER retrograde traffic; Kinesins; MHC class II antigen presentation; Recycling pathway of L1	Retinoblastoma (RB) in Cancer	16	0.581	0.829	4.675	3.764	2.143	4.262	7.371	12.657	18	10.8	14.1	107.2	106.4	52.8	99.9	172.5	318.4	2.35841e+07	1.41438e+07	1.84983e+07
High	Master Protein	Q9C0C2	182 kDa tankyrase-1-binding protein [OS=Homo sapiens]	>ProteinCenter:SwissProt|Q9C0C2 182 kDa tankyrase-1-binding protein [OS=Homo sapiens]	0	FALSE	74.71	14	20	20	45	20	1729	181.7	4.86	53.77	20	cell organization and biogenesis;metabolic process;regulation of biological process;response to stimulus	chromosome;cytoplasm;cytoskeleton;cytosol;nucleus	protein binding	Pf15327	85456	ENSG00000149115.13	TNKS1BP1	11		TP53 regulates transcription of additional cell cycle genes whose exact role in the p53 pathway remain uncertain; Deadenylation of mRNA		9	0.885	0.682	9.503	20.979	11.617	2.569	5.255	5.668	8.8	6.7	6.4	207.4	332.3	178.8	30.6	58.4	70.7	3.93626e+06	3.00279e+06	2.86111e+06
High	Master Protein	Q96TA1	Niban-like protein 1 [OS=Homo sapiens]	>ProteinCenter:SwissProt|Q96TA1 Niban-like protein 1 [OS=Homo sapiens]	0	FALSE	74.434	34	17	21	50	17	746	84.1	6.19	45.49	17	cell differentiation;cellular component movement;metabolic process;regulation of biological process;transport	cytoplasm;cytosol;membrane;nucleus	protein binding		64855	ENSG00000136830.11	FAM129B	9				0	0.776	0.654	5.74	9.686	6.054	0.641	1.367	1.058	39.4	18.6	17.8	202.7	310.7	192.9	27.8	50.6	39.4	6.24617e+07	2.94266e+07	2.82885e+07
High	Master Protein	P62258-1	14-3-3 protein epsilon [OS=Homo sapiens]	>ProteinCenter:SwissProt|P62258-1 14-3-3 protein epsilon [OS=Homo sapiens]	0	FALSE	74.359	56	17	20	65	15	255	29.2	4.74	65.95	17	cell organization and biogenesis;cellular component movement;cellular homeostasis;metabolic process;regulation of biological process;response to stimulus;transport	cytoplasm;cytosol;membrane;mitochondrion;nucleus	protein binding;RNA binding	Pf00244	7531	ENSG00000108953.16; ENSG00000274474.3	YWHAE	17; CHR_HSCHR17_2_CTG2	PI3K-Akt signaling pathway; Hippo signaling pathway; Viral carcinogenesis; Cell cycle; Neurotrophin signaling pathway; Oocyte meiosis; Epstein-Barr virus infection	Regulation of PLK1 Activity at G2/M Transition; Recruitment of NuMA to mitotic centrosomes; Loss of Nlp from mitotic centrosomes; NADE modulates death signalling; Translocation of GLUT4 to the plasma membrane; Deregulated CDK5 triggers multiple neurodegenerative pathways in Alzheimer's disease models; Chk1/Chk2(Cds1) mediated inactivation of Cyclin B:Cdk1 complex; Signaling by Hippo; AURKA Activa…	Cell Cycle; Myometrial Relaxation and Contraction Pathways; VEGFA-VEGFR2 Signaling Pathway; Calcium Regulation in the Cardiac Cell; Sudden Infant Death Syndrome (SIDS) Susceptibility Pathways	65	0.731	0.651	2.162	5.111	2.155	1.687	5.712	3.011	43.3	35.1	28.3	99.1	220.4	112.8	59.5	168.3	133.3	1.62041e+08	1.31364e+08	1.05805e+08
High	Master Protein	Q969P0	Immunoglobulin superfamily member 8 [OS=Homo sapiens]	>ProteinCenter:SwissProt|Q969P0 Immunoglobulin superfamily member 8 [OS=Homo sapiens]	0	FALSE	74.33	33	17	17	104	17	613	65	8	104.67	17	cell proliferation;cellular component movement	membrane	protein binding	Pf07686	93185	ENSG00000162729.13	IGSF8	1				0	0.821	1.022	0.725	0.934	1.115	1.338	1.152	0.722	104.3	95.4	126.5	63.7	73.9	100.4	142	116.5	77.4	3.84332e+08	3.51528e+08	4.66187e+08
High	Master Protein	Q9BUF5	Tubulin beta-6 chain [OS=Homo sapiens]	>ProteinCenter:SwissProt|Q9BUF5 Tubulin beta-6 chain [OS=Homo sapiens]	0	FALSE	73.956	23	11	21	149	3	446	49.8	4.88	114.88	11	cell organization and biogenesis	cytoplasm;cytoskeleton;nucleus	catalytic activity;nucleotide binding;structural molecule activity	Pf00091, Pf03953, Pf10644	84617	ENSG00000176014.12	TUBB6	18	Phagosome; Pathogenic Escherichia coli infection; Gap junction	COPI-independent Golgi-to-ER retrograde traffic; COPI-dependent Golgi-to-ER retrograde traffic; Carboxyterminal post-translational modifications of tubulin; Recruitment of NuMA to mitotic centrosomes; Hedgehog 'off' state; Translocation of GLUT4 to the plasma membrane; Prefoldin mediated transfer of substrate to CCT/TriC; Microtubule-dependent trafficking of connexons from Golgi to the plasma mem…	Pathogenic Escherichia coli infection; Parkin-Ubiquitin Proteasomal System pathway	65	0.727	0.628	0.278	0.269	0.454	0.539	0.888	0.569	72.8	52.4	38.7	190.8	166.7	215.9	42.7	77.9	42.1	3.83959e+07	2.76075e+07	2.04154e+07
High	Master Protein	P68104	Elongation factor 1-alpha 1 [OS=Homo sapiens]	>ProteinCenter:SwissProt|P68104 Elongation factor 1-alpha 1 [OS=Homo sapiens]	0	FALSE	73.812	39	16	17	112	7	462	50.1	9.01	135.13	16	metabolic process;regulation of biological process;response to stimulus;transport	cytoplasm;cytoskeleton;cytosol;extracellular;membrane;nucleus;organelle lumen	catalytic activity;nucleotide binding;protein binding;RNA binding	Pf00009, Pf03143, Pf03144	1915	ENSG00000156508.17	EEF1A1	6	RNA transport; Legionellosis	Peptide chain elongation; Protein methylation; Neutrophil degranulation; HSF1 activation	Translation Factors	16	0.606	0.324	1.66	1.056	0.991	0.699	0.858	1.221	72.3	53.5	61.6	162.2	127	105.5	91.5	108.8	117.5	5.64051e+08	4.1756e+08	4.80102e+08
High	Master Protein	P30101	Protein disulfide-isomerase A3 [OS=Homo sapiens]	>ProteinCenter:SwissProt|P30101 Protein disulfide-isomerase A3 [OS=Homo sapiens]	0	FALSE	73.746	39	20	22	60	20	505	56.7	6.35	57.96	20	cellular homeostasis;metabolic process;regulation of biological process;response to stimulus;transport	cell surface;endoplasmic reticulum;membrane;nucleus;organelle lumen	catalytic activity;protein binding;RNA binding	Pf00085, Pf13098, Pf13848, Pf13899, Pf13905	2923	ENSG00000167004.12	PDIA3	15	Protein processing in endoplasmic reticulum; Antigen processing and presentation	ER-Phagosome pathway; Calnexin/calreticulin cycle; Antigen Presentation: Folding, assembly and peptide loading of class I MHC		13	0.925	0.971	15.032	15.083	2.234	2.021	5.176	4.367	19.4	17.9	18.8	291.2	298.4	38.1	34.8	102	79.3	5.63067e+07	5.19999e+07	5.45389e+07
High	Master Protein	P50991	T-complex protein 1 subunit delta [OS=Homo sapiens]	>ProteinCenter:SwissProt|P50991 T-complex protein 1 subunit delta [OS=Homo sapiens]	0	FALSE	73.248	37	19	19	69	19	539	57.9	7.83	60.79	19	metabolic process;regulation of biological process;transport	cytoplasm;cytoskeleton;cytosol	nucleotide binding;protein binding;RNA binding	Pf00118	10575	ENSG00000115484.14	CCT4	2		BBSome-mediated cargo-targeting to cilium; Prefoldin mediated transfer of substrate to CCT/TriC; Cooperation of PDCL (PhLP1) and TRiC/CCT in G-protein beta folding; Association of TriC/CCT with target proteins during biosynthesis; Formation of tubulin folding intermediates by CCT/TriC; Folding of actin by CCT/TriC		13	0.994	1.106	1.156	1.129	0.845	1.296	1.748	1.676	83.5	98.3	111.2	68.1	76.4	45	117.8	139.7	160	2.70922e+08	3.19017e+08	3.60935e+08
High	Master Protein	O00468	Agrin [OS=Homo sapiens]	>ProteinCenter:SwissProt|O00468 Agrin [OS=Homo sapiens]	0	FALSE	73.021	11	18	20	66	18	2067	217.1	6.39	58.91	18	cell differentiation;cell organization and biogenesis;development;metabolic process;regulation of biological process;response to stimulus	cytosol;extracellular;membrane;organelle lumen	metal ion binding;protein binding;structural molecule activity	Pf00050, Pf00053, Pf00054, Pf01390, Pf02210, Pf03146, Pf07648	375790		AGRN	1	ECM-receptor interaction	Integrin cell surface interactions; Defective B4GALT7 causes EDS, progeroid type; Retinoid metabolism and transport; Defective EXT2 causes exostoses 2; Non-integrin membrane-ECM interactions; Defective EXT1 causes exostoses 1, TRPS2 and CHDS; Signaling by GPCR; ECM proteoglycans; HS-GAG biosynthesis; A tetrasaccharide linker sequence is required for GAG synthesis; Defective B3GALT6 causes EDSP2 a…	Primary Focal Segmental Glomerulosclerosis FSGS	32	0.806	0.785	2.263	3.157	2.561	0.072	0.12	0.13	73.4	62.5	63.8	161.9	297.5	208.7	7.4	11.6	13.1	8.90851e+07	7.59343e+07	7.74206e+07
High	Master Protein	Q9Y230	RuvB-like 2 [OS=Homo sapiens]	>ProteinCenter:SwissProt|Q9Y230 RuvB-like 2 [OS=Homo sapiens]	0	FALSE	72.818	44	20	20	69	20	463	51.1	5.64	80.7	20	cell organization and biogenesis;metabolic process;regulation of biological process;response to stimulus	cytoplasm;cytosol;membrane;nucleus	catalytic activity;DNA binding;nucleotide binding;protein binding	Pf00004, Pf03796, Pf06068, Pf13481	10856	ENSG00000183207.13	RUVBL2	19		HATs acetylate histones; Telomere Extension By Telomerase		8	0.815	0.842	1.432	1.317	0.928	0.854	1.324	0.967	99.5	80.9	84.7	129.2	123.9	85.4	87.1	112	97.2	1.64334e+08	1.33539e+08	1.39873e+08
High	Master Protein	Q13418	Integrin-linked protein kinase [OS=Homo sapiens]	>ProteinCenter:SwissProt|Q13418 Integrin-linked protein kinase [OS=Homo sapiens]	0	FALSE	72.437	25	11	17	102	11	452	51.4	8.07	105.5	11	cell organization and biogenesis;cell proliferation;cellular component movement;development;metabolic process;regulation of biological process;response to stimulus	cytoplasm;cytosol;membrane	catalytic activity;nucleotide binding;protein binding;signal transducer activity	Pf00023, Pf00069, Pf07714, Pf12796, Pf13606, Pf13637, Pf13857	3611	ENSG00000166333.13	ILK	11	Bacterial invasion of epithelial cells; PPAR signaling pathway; Focal adhesion; Axon guidance; Endometrial cancer	Localization of the PINCH-ILK-PARVIN complex to focal adhesions	Integrin-mediated Cell Adhesion; Primary Focal Segmental Glomerulosclerosis FSGS; Focal Adhesion; Factors and pathways affecting insulin-like growth factor (IGF1)-Akt signaling; PPAR signaling pathway; Eukaryotic Transcription Initiation	15	0.973	1.138	0.618	0.525	1.006	1.475	1.057	0.967	114.8	109.6	116	79.7	64.8	127	129.7	70.3	88	7.87194e+08	7.51485e+08	7.95411e+08
High	Master Protein	P11586	C-1-tetrahydrofolate synthase, cytoplasmic [OS=Homo sapiens]	>ProteinCenter:SwissProt|P11586 C-1-tetrahydrofolate synthase, cytoplasmic [OS=Homo sapiens]	0	FALSE	71.461	24	18	20	62	18	935	101.5	7.3	62.93	18	metabolic process	cytoplasm;cytosol;membrane;mitochondrion	catalytic activity;nucleotide binding;protein binding	Pf00763, Pf01268, Pf02882	4522		MTHFD1	14	One carbon pool by folate; Metabolic pathways	Metabolism of folate and pterines	Folate Metabolism; One Carbon Metabolism; Trans-sulfuration and one carbon metabolism	9	0.794	0.749	1.577	1.286	0.958	1.015	1.595	1.607	86.9	77.7	74.9	125.3	95.3	80.1	103.3	123.9	132.6	1.57108e+08	1.40387e+08	1.3538e+08
High	Master Protein	Q3MHN2	SWISS-PROT:Q3MHN2 (Bos taurus) Complement component C9 precursor	>Q3MHN2 SWISS-PROT:Q3MHN2 (Bos taurus) Complement component C9 precursor	0	TRUE	71.346	27	14	17	74	14	548	62	5.9	77.62	14	cell organization and biogenesis;defense response;metabolic process;regulation of biological process;response to stimulus	cytosol;extracellular;membrane	protein binding	Pf00057, Pf01823	526766	ENSBTAG00000016149.3	C9	20	Systemic lupus erythematosus; Amoebiasis; Complement and coagulation cascades; Prion diseases	Terminal pathway of complement; Regulation of Complement cascade	Complement and Coagulation Cascades; Complement Activation, Classical Pathway	11	0.793	0.735	0.319	0.307	0.711	0.613	0.38	0.346	179.1	154.9	172.3	51.1	36.7	81.2	104.1	52.6	68	8.24558e+08	7.13346e+08	7.93375e+08
High	Master Protein	P13645	SWISS-PROT:P13645 Tax_Id=9606 Gene_Symbol=KRT10 Keratin, type I cytoskeletal 10	>P13645 SWISS-PROT:P13645 Tax_Id=9606 Gene_Symbol=KRT10 Keratin, type I cytoskeletal 10	0	TRUE	71.298	32	19	22	85	14	593	59.5	5.21	92.78	19	metabolic process		structural molecule activity	Pf00038, Pf04111								0	1.924	3.932	3.755	5.154	9.339	22.137	5.021	23.888	9.9	18.5	54.2	37.3	53.5	123.3	239.2	60.3	303.9	2.07682e+07	3.88276e+07	1.13955e+08
High	Master Protein	P12111	Collagen alpha-3(VI) chain [OS=Homo sapiens]	>ProteinCenter:SwissProt|P12111 Collagen alpha-3(VI) chain [OS=Homo sapiens]	0	FALSE	70.885	6	21	21	91	21	3177	343.5	6.68	104.44	21	cell organization and biogenesis;metabolic process;regulation of biological process	extracellular;membrane;organelle lumen	enzyme regulator activity;protein binding	Pf00014, Pf00041, Pf00092, Pf01391, Pf13519, Pf13768	1293	ENSG00000163359.15	COL6A3	2	Protein digestion and absorption; ECM-receptor interaction; Focal adhesion; PI3K-Akt signaling pathway	ECM proteoglycans; Collagen degradation; Integrin cell surface interactions; Assembly of collagen fibrils and other multimeric structures; Collagen chain trimerization; NCAM1 interactions; Signaling by PDGF	miRNA targets in ECM and membrane receptors	21	1.142	1.244	0.456	0.362	0.75	0.795	0.485	0.768	129.9	148	161.1	71.2	62.6	85.5	89.5	55	97.2	9.02143e+08	1.02773e+09	1.11915e+09
High	Master Protein	P02545	Prelamin-A/C [OS=Homo sapiens]	>ProteinCenter:SwissProt|P02545 Prelamin-A/C [OS=Homo sapiens]	0	FALSE	70.875	35	21	21	40	20	664	74.1	7.02	48.72	21	cell organization and biogenesis;regulation of biological process;response to stimulus;transport	cytosol;membrane;nucleus	protein binding;structural molecule activity	Pf00038, Pf00932	4000	ENSG00000160789.19	LMNA	1	Arrhythmogenic right ventricular cardiomyopathy (ARVC); Hypertrophic cardiomyopathy (HCM); Dilated cardiomyopathy; Apoptosis	Signaling by BRAF and RAF fusions; Breakdown of the nuclear lamina; XBP1(S) activates chaperone genes; Initiation of Nuclear Envelope Reformation; Clearance of Nuclear Envelope Membranes from Chromatin; Depolymerisation of the Nuclear Lamina; Deregulated CDK5 triggers multiple neurodegenerative pathways in Alzheimer's disease models	Arrhythmogenic Right Ventricular Cardiomyopathy; Adipogenesis; Fas Ligand (FasL) pathway and Stress induction of Heat Shock Proteins (HSP) regulation	33	0.761	0.974	10.559	7.733	2.095	1.34	4.025	3.177	28.1	19.1	30.3	268.2	250.2	75.7	29.4	110.9	88	2.75154e+07	1.87655e+07	2.96812e+07
High	Master Protein	sp Q06830	peroxiredoxin-1 [OS=Homo sapiens]	>sp|PRDX1_HUMAN| >ProteinCenter:SwissProt|Q06830 peroxiredoxin-1 [OS=Homo sapiens]	0	TRUE	70.67	56	15	17	80	12	199	22.1	8.13	73.41	15												0	0.575	0.52	2.352	3.397	1.561	0.669	1.991	1.151	77.8	45.1	49.1	167.7	189.4	97.4	53.9	120.5	99.2	3.34163e+08	1.93546e+08	2.10796e+08
High	Master Protein	P50990	T-complex protein 1 subunit theta [OS=Homo sapiens]	>ProteinCenter:SwissProt|P50990 T-complex protein 1 subunit theta [OS=Homo sapiens]	0	FALSE	70.503	34	20	22	69	20	548	59.6	5.6	77.92	20	cell organization and biogenesis;metabolic process;regulation of biological process;transport	cytoplasm;cytoskeleton;cytosol;extracellular;organelle lumen	catalytic activity;nucleotide binding;protein binding	Pf00118	10694	ENSG00000156261.12	CCT8	21		BBSome-mediated cargo-targeting to cilium; Prefoldin mediated transfer of substrate to CCT/TriC; Cooperation of PDCL (PhLP1) and TRiC/CCT in G-protein beta folding; Association of TriC/CCT with target proteins during biosynthesis; Neutrophil degranulation; Folding of actin by CCT/TriC; Formation of tubulin folding intermediates by CCT/TriC		16	0.994	0.869	0.929	0.918	0.635	1.082	1.626	1.585	90.3	87.4	86.3	88	92.8	67	100.8	147.7	139.8	3.57284e+08	3.45686e+08	3.4159e+08
High	Master Protein	P00735	SWISS-PROT:P00735 (Bos taurus) Prothrombin precursor (Fragment)	>P00735 SWISS-PROT:P00735 (Bos taurus) Prothrombin precursor (Fragment)	0	TRUE	70.492	19	14	15	93	14	625	70.5	6.33	94.98	14	cell organization and biogenesis;cellular homeostasis;coagulation;defense response;metabolic process;regulation of biological process;response to stimulus	extracellular	catalytic activity;metal ion binding;protein binding;receptor activity;signal transducer activity	Pf00051, Pf00089, Pf00594, Pf09396	280685	ENSBTAG00000007148.5	F2	15	Complement and coagulation cascades; Regulation of actin cytoskeleton; Neuroactive ligand-receptor interaction	Intrinsic Pathway of Fibrin Clot Formation; Cell surface interactions at the vascular wall; Peptide ligand-binding receptors; Thrombin signalling through proteinase activated receptors (PARs); Common Pathway of Fibrin Clot Formation; Removal of aminoterminal propeptides from gamma-carboxylated proteins; Transport of gamma-carboxylated protein precursors from the endoplasmic reticulum to the Golgi…	Complement and Coagulation Cascades; Regulation of Actin Cytoskeleton; Folate Metabolism; IL1 and megakaryotyces in obesity; Vitamin B12 Metabolism; Blood Clotting Cascade; Selenium Micronutrient Network	38	1.258	1.149	0.586	0.796	1.865	1.055	0.964	0.833	82.8	168.4	228.1	17.9	23.9	45.9	146.3	59	127.7	1.31752e+09	2.67948e+09	3.62839e+09
High	Master Protein	Q00839	Heterogeneous nuclear ribonucleoprotein U [OS=Homo sapiens]	>ProteinCenter:SwissProt|Q00839 Heterogeneous nuclear ribonucleoprotein U [OS=Homo sapiens]	0	FALSE	70.392	18	17	20	52	17	825	90.5	6	71.33	17	cell differentiation;metabolic process;regulation of biological process;response to stimulus	cell surface;chromosome;cytoplasm;membrane;nucleus;spliceosomal complex	DNA binding;nucleotide binding;protein binding;RNA binding	Pf00622, Pf13671	3192	ENSG00000153187.18	HNRNPU	1	Spliceosome	mRNA Splicing - Major Pathway	mRNA Processing	6	0.648	0.852	6.932	3.575	1.63	1.81	2.898	3.078	41.4	21.8	37	290.6	121.3	49.6	83.4	142.2	112.7	7.9683e+07	4.20124e+07	7.12451e+07
High	Master Protein	P50995	annexin A11 [OS=Homo sapiens]	>ProteinCenter:SwissProt|P50995 annexin A11 [OS=Homo sapiens]	0	FALSE	70.366	33	18	18	82	17	505	54.4	7.65	91.21	18	cell division;response to stimulus;transport	cytoplasm;cytoskeleton;cytosol;membrane;nucleus;vacuole	metal ion binding;protein binding;RNA binding	Pf00191	311	ENSG00000122359.17	ANXA11	10				0	1.095	0.953	1.384	4.261	2.495	3.698	3.797	2.846	56.7	54.8	57.3	73.4	116.8	82.4	172.6	165.4	120.6	2.82421e+08	2.72854e+08	2.85493e+08
High	Master Protein	P35908	Keratin, type II cytoskeletal 2 epidermal [OS=Homo sapiens]	>ProteinCenter:SwissProt|P35908 Keratin, type II cytoskeletal 2 epidermal [OS=Homo sapiens]	0	TRUE	69.993	36	18	19	57	13	639	65.4	8	63.86	18	cell death;cell organization and biogenesis;cell proliferation;cellular component movement;metabolic process	cytoskeleton;cytosol;membrane;nucleus	protein binding;structural molecule activity	Pf00038, Pf08614, Pf12128, Pf13166	3849	ENSG00000172867.3	KRT2	12		Formation of the cornified envelope		3	1.414	4.271	2.759	1.596	6.37	9.767	3.804	10.774	17.7	26.1	73.6	40.2	44.4	149.1	227.6	98.2	223	1.79098e+07	2.64545e+07	7.44759e+07
High	Master Protein	P14625	Endoplasmin [OS=Homo sapiens]	>ProteinCenter:SwissProt|P14625 Endoplasmin [OS=Homo sapiens]	0	FALSE	69.478	21	19	19	64	18	803	92.4	4.84	67.31	19	cell organization and biogenesis;metabolic process;regulation of biological process;response to stimulus;transport	cytosol;endoplasmic reticulum;extracellular;membrane;nucleus;organelle lumen	metal ion binding;nucleotide binding;protein binding;RNA binding	Pf00183, Pf02518, Pf13589	7184	ENSG00000166598.14	HSP90B1	12	Estrogen signaling pathway; Prostate cancer; Thyroid hormone synthesis; Pathways in cancer; PI3K-Akt signaling pathway; Protein processing in endoplasmic reticulum	Post-translational protein phosphorylation; Regulation of Insulin-like Growth Factor (IGF) transport and uptake by Insulin-like Growth Factor Binding Proteins (IGFBPs); ATF6 (ATF6-alpha) activates chaperone genes; Interleukin-4 and 13 signaling; Trafficking and processing of endosomal TLR; Scavenging by Class A Receptors	Photodynamic therapy-induced unfolded protein response; Focal Adhesion-PI3K-Akt-mTOR-signaling pathway; Sudden Infant Death Syndrome (SIDS) Susceptibility Pathways	26	0.855	0.903	4.955	10.206	1.329	1.723	4.692	3.123	34.1	27.2	29.8	209.5	254.5	36.7	52	149.4	107	7.86702e+07	6.26972e+07	6.87292e+07
High	Master Protein	P23526-1	Adenosylhomocysteinase [OS=Homo sapiens]	>ProteinCenter:SwissProt|P23526-1 Adenosylhomocysteinase [OS=Homo sapiens]	0	FALSE	69.425	35	18	19	93	16	432	47.7	6.34	96.79	18	defense response;metabolic process;response to stimulus;transport	cytoplasm;cytosol;nucleus	catalytic activity;nucleotide binding;protein binding	Pf00670, Pf02254, Pf02826, Pf05221	191	ENSG00000101444.12	AHCY	20	Metabolic pathways; Cysteine and methionine metabolism	Metabolism of ingested SeMet, Sec, MeSec into H2Se; Defective AHCY causes Hypermethioninemia with S-adenosylhomocysteine hydrolase deficiency (HMAHCHD); Sulfur amino acid metabolism; Methylation	Folate Metabolism; Trans-sulfuration pathway; One Carbon Metabolism; Trans-sulfuration and one carbon metabolism	18	0.897	0.761	1.223	1.03	1.369	0.961	1.206	0.985	92.1	85.8	76.7	109.8	97	133.1	84.7	123.4	97.3	7.22514e+08	6.72887e+08	6.02131e+08
High	Master Protein	P22314	Ubiquitin-like modifier-activating enzyme 1 [OS=Homo sapiens]	>ProteinCenter:SwissProt|P22314 Ubiquitin-like modifier-activating enzyme 1 [OS=Homo sapiens]	0	FALSE	69.382	22	17	18	50	17	1058	117.8	5.76	39.06	17	metabolic process;response to stimulus	cytoplasm;cytosol;membrane;mitochondrion;nucleus	catalytic activity;nucleotide binding;protein binding;RNA binding	Pf00899, Pf02134, Pf09358, Pf10585	7317	ENSG00000130985.16	UBA1	X	Ubiquitin mediated proteolysis; Parkinson's disease	Synthesis of active ubiquitin: roles of E1 and E2 enzymes; Antigen processing: Ubiquitination & Proteasome degradation	Proteasome Degradation; Parkin-Ubiquitin Proteasomal System pathway; Parkinsons Disease Pathway	13	0.911	0.956	2.223	1.295	1.488	1.774	2.859	2.645	67.1	75.4	99.8	101.4	87.3	67.9	119.3	116.8	165	1.76259e+08	1.98282e+08	2.62364e+08
High	Master Protein	P35527 sp	SWISS-PROT:P35527 Tax_Id=9606 Gene_Symbol=KRT9 Keratin, type I cytoskeletal 9	>P35527 SWISS-PROT:P35527 Tax_Id=9606 Gene_Symbol=KRT9 Keratin, type I cytoskeletal 9 >sp|K1C9_HUMAN|	0	TRUE	68.818	26	14	16	66	13	623	62.1	5.3	99.63	14	cell death;cell organization and biogenesis	cytosol;membrane;nucleus	structural molecule activity	Pf00038, Pf13166	3857		KRT9	17				0	1.191	3.861	5.358	7.018	8.002	4.327	4.683	12.928	18.3	32.6	100	86.5	120.4	132.8	83.6	83.9	242	4.57103e+07	8.15681e+07	2.50362e+08
High	Master Protein	Q9UHB6	LIM domain and actin-binding protein 1 [OS=Homo sapiens]	>ProteinCenter:SwissProt|Q9UHB6 LIM domain and actin-binding protein 1 [OS=Homo sapiens]	0	FALSE	68.815	23	15	15	38	15	759	85.2	6.84	44.06	15	cell organization and biogenesis;regulation of biological process	cytoplasm;cytoskeleton	metal ion binding;protein binding	Pf00412	51474	ENSG00000050405.13	LIMA1	12				0	0.769	2.154	20.37	33.192	14.271	1.82	3.88	2.643	8.9	3	8.3	235.3	374.6	186.7	16.7	38.5	28	4.91054e+06	1.64719e+06	4.5983e+06
High	Master Protein	Q01518-1	adenylyl cyclase-associated protein 1 [OS=Homo sapiens]	>ProteinCenter:SwissProt|Q01518-1 adenylyl cyclase-associated protein 1 [OS=Homo sapiens]	0	FALSE	68.307	36	17	18	54	17	475	51.9	8.06	68.25	17	cell organization and biogenesis;cellular component movement;regulation of biological process;response to stimulus;transport	cytoplasm;cytoskeleton;extracellular;membrane;organelle lumen	protein binding	Pf01213, Pf07986, Pf08603	10487	ENSG00000131236.16	CAP1	1		Platelet degranulation ; Neutrophil degranulation; Role of ABL in ROBO-SLIT signaling	Angiopoietin Like Protein 8 Regulatory Pathway; Insulin Signaling	13	0.708	0.578	2.966	2.991	1.448	0.915	2.368	2.354	59.5	50.7	42.1	142.6	174.3	94.7	59.6	137.8	138.7	6.01651e+07	5.12273e+07	4.26132e+07
High	Master Protein	P62937	peptidyl-prolyl cis-trans isomerase A [OS=Homo sapiens]	>ProteinCenter:SwissProt|P62937 peptidyl-prolyl cis-trans isomerase A [OS=Homo sapiens]	0	FALSE	68.066	68	9	17	42	1	165	18	7.81	46.09	9	cell organization and biogenesis;cellular component movement;metabolic process;regulation of biological process;response to stimulus;transport	cytoplasm;cytosol;extracellular;membrane;nucleus;organelle lumen	catalytic activity;protein binding;RNA binding	Pf00160	5478	ENSG00000196262.13	PPIA	7		Budding and maturation of HIV virion; Gene and protein expression by JAK-STAT signaling after Interleukin-12 stimulation; Minus-strand DNA synthesis; Binding and entry of HIV virion; Basigin interactions; APOBEC3G mediated resistance to HIV-1 infection; Uncoating of the HIV Virion; Calcineurin activates NFAT; Platelet degranulation ; Plus-strand DNA synthesis; Integration of provirus; Neutrophil …	Prolactin Signaling Pathway	34	0.765	0.01	83.277	100	42.874	1.156	0.727	0.296	30.3	23.1		273.1	358.9	148.9	34.9	21.9	8.9	2.12771e+06	1.62269e+06
High	Master Protein	Q0IIK2	TREMBL:Q0IIK2 (Bos taurus) Transferrin	>Q0IIK2 TREMBL:Q0IIK2 (Bos taurus) Transferrin	0	TRUE	67.703	26	17	17	59	16	704	77.7	7.08	61.04	17	cellular homeostasis;transport		metal ion binding;transporter activity	Pf00405, Pf12974	280705		TF	1	HIF-1 signaling pathway; Mineral absorption			2	0.493	0.414	0.526	0.539	1.041	0.699	0.567	0.415	190.8	101.7	103.1	68.8	44	83.8	166.3	52.4	89.1	7.60536e+08	4.05432e+08	4.11133e+08
High	Master Protein	O75083	WD repeat-containing protein 1 [OS=Homo sapiens]	>ProteinCenter:SwissProt|O75083 WD repeat-containing protein 1 [OS=Homo sapiens]	0	FALSE	67.584	30	18	19	74	18	606	66.2	6.65	81.38	18	cell differentiation;cell organization and biogenesis;cellular component movement;metabolic process;regulation of biological process;transport	cytoplasm;cytoskeleton;cytosol;extracellular	protein binding	Pf00400, Pf04762, Pf08662, Pf14783	9948	ENSG00000071127.16	WDR1	4		Platelet degranulation	Hypertrophy Model	5	0.914	0.832	1.581	1.805	1.644	0.887	1.015	0.909	90	87.3	88.5	119.3	136.3	119.1	88.2	84.9	86.4	5.23773e+08	5.07634e+08	5.15033e+08
High	Master Protein	O75955	Flotillin-1 [OS=Homo sapiens]	>ProteinCenter:SwissProt|O75955 Flotillin-1 [OS=Homo sapiens]	0	FALSE	67.325	42	15	17	55	15	427	47.3	7.49	57.14	15	cell organization and biogenesis;regulation of biological process;response to stimulus;transport	cytoskeleton;endosome;membrane	protein binding	Pf01145	10211	ENSG00000206379.12; ENSG00000230143.9; ENSG00000137312.14; ENSG00000206480.11; ENSG00000232280.9	FLOT1	6; CHR_HSCHR6_MHC_DBB_CTG1; CHR_HSCHR6_MHC_SSTO_CTG1; CHR_HSCHR6_MHC_QBL_CTG1; CHR_HSCHR6_MHC_COX_CTG1	Insulin signaling pathway	Synaptic adhesion-like molecules	Angiopoietin Like Protein 8 Regulatory Pathway; Insulin Signaling	6	0.82	0.859	1.044	1.083	1.096	1.077	1.604	0.831	98.1	71.2	72.4	112.6	113.5	110	101.3	142.1	78.7	1.94591e+08	1.41175e+08	1.43625e+08
High	Master Protein	P41361	SWISS-PROT:P41361 (Bos taurus) Antithrombin-III precursor	>P41361 SWISS-PROT:P41361 (Bos taurus) Antithrombin-III precursor	0	TRUE	66.67	27	12	14	72	12	465	52.3	7.33	85.39	12	coagulation;regulation of biological process	extracellular	enzyme regulator activity	Pf00079	540261		SERPINC1	16	Complement and coagulation cascades			1	1.185	1.219	0.359	0.136	0.409	0.186	0.248	0.245	159.7	223.8	244.3	45.3	21.2	53.3	47.9	61.3	43.3	1.20881e+09	1.69443e+09	1.84915e+09
High	Master Protein	P54652	Heat shock-related 70 kDa protein 2 [OS=Homo sapiens]	>ProteinCenter:SwissProt|P54652 Heat shock-related 70 kDa protein 2 [OS=Homo sapiens]	0	FALSE	66.66	19	13	16	69	1	639	70	5.74	89.41	13	cell differentiation;cell organization and biogenesis;metabolic process;regulation of biological process;response to stimulus	cell surface;cytoplasm;cytoskeleton;cytosol;membrane;mitochondrion;nucleus	nucleotide binding;protein binding	Pf00012, Pf06723	3306	ENSG00000126803.9	HSPA2	14	Influenza A; Protein processing in endoplasmic reticulum; Epstein-Barr virus infection; Legionellosis; Measles; MAPK signaling pathway; Antigen processing and presentation; Longevity regulating pathway - multiple species; Estrogen signaling pathway; Toxoplasmosis; Spliceosome; Endocytosis	Meiotic synapsis; Attenuation phase; HSP90 chaperone cycle for steroid hormone receptors (SHR); Regulation of HSF1-mediated heat shock response	Parkin-Ubiquitin Proteasomal System pathway	24			100	100		100	100	100				48.1	49.1		359.3	182.4	261.1
High	Master Protein	Q6UVK1	Chondroitin sulfate proteoglycan 4 [OS=Homo sapiens]	>ProteinCenter:SwissProt|Q6UVK1 Chondroitin sulfate proteoglycan 4 [OS=Homo sapiens]	0	FALSE	66.179	11	20	20	37	20	2322	250.4	5.47	49.34	20	cell differentiation;cell proliferation;cellular component movement;development;metabolic process;regulation of biological process;response to stimulus	cell surface;extracellular;membrane;organelle lumen	protein binding;signal transducer activity	Pf00054, Pf02210	1464	ENSG00000173546.7	CSPG4	15		A tetrasaccharide linker sequence is required for GAG synthesis; Dermatan sulfate biosynthesis; Defective CHSY1 causes TPBS; Defective B4GALT7 causes EDS, progeroid type; Defective B3GALT6 causes EDSP2 and SEMDJL1; CS/DS degradation; Defective CHST14 causes EDS, musculocontractural type; Defective CHST3 causes SEDCJD; Chondroitin sulfate biosynthesis; Defective B3GAT3 causes JDSSDHD	Spinal Cord Injury	19	0.905	1.117	2.42	2.36	3.228	0.192	0.185	0.199	75.2	66	77.7	223	179.4	266.2	5.6	3.5	3.5	2.53464e+07	2.22522e+07	2.61958e+07
High	Master Protein	sp		>sp|PPIA_HUMAN|	0	TRUE	65.899	68	9	16	56	1	164	17.9	7.81	48.53	9												0	0.676	0.16	2.604	5.767	3.793	0.438	0.584	1.666	53.9	36.5	8.6	140.4	311	204.5	23.6	31.5	89.9	1.69269e+07	1.14416e+07	2.70457e+06
High	Master Protein	O15031	Plexin-B2 [OS=Homo sapiens]	>ProteinCenter:SwissProt|O15031 Plexin-B2 [OS=Homo sapiens]	0	FALSE	65.765	15	20	21	42	20	1838	205	6.24	36.67	20	cell proliferation;development;regulation of biological process;response to stimulus	cell surface;membrane	protein binding;receptor activity;signal transducer activity	Pf01403, Pf01437, Pf01833, Pf08337	23654	ENSG00000196576.14	PLXNB2	22	Axon guidance			1	0.677	0.576	2.851	4.603	3.57	0.489	0.596	0.66	67.3	51.7	57.8	163.3	252.2	190.7	33.1	40.6	43.2	4.12758e+07	3.16902e+07	3.54864e+07
High	Master Protein	P10412	Histone H1.4 [OS=Homo sapiens]	>ProteinCenter:SwissProt|P10412 Histone H1.4 [OS=Homo sapiens]	0	FALSE	65.75	38	11	13	71	2	219	21.9	11.03	73.08	11	cell organization and biogenesis;metabolic process;regulation of biological process	chromosome;nucleus	DNA binding;metal ion binding;nucleotide binding;protein binding;RNA binding	Pf00538	3008	ENSG00000168298.6	HIST1H1E	6		Formation of Senescence-Associated Heterochromatin Foci (SAHF); Activation of DNA fragmentation factor	Pathways Affected in Adenoid Cystic Carcinoma	11	1.073	1.243	0.165	0.01	0.01	3.037	0.01	0.966	120.2	129	149.4	19.9			365.2		116.2	2.8162e+07	3.02202e+07	3.50022e+07
High	Master Protein	Q9UDY2	Tight junction protein ZO-2 [OS=Homo sapiens]	>ProteinCenter:SwissProt|Q9UDY2 Tight junction protein ZO-2 [OS=Homo sapiens]	0	FALSE	65.125	21	21	21	48	21	1190	133.9	7.4	60.82	21	metabolic process;regulation of biological process;response to stimulus;transport	cytosol;membrane;nucleus	catalytic activity;protein binding	Pf00595, Pf00625, Pf07653, Pf13180	9414	ENSG00000119139.17	TJP2	9	Vibrio cholerae infection; Tight junction	Apoptotic cleavage of cell adhesion proteins; Signaling by Hippo		9	0.887	1.06	7.332	9.076	6.63	3.582	6.666	8.208	15.9	15.6	16.6	167.9	222.1	134.1	59.1	116.4	152.3	1.09938e+07	1.07665e+07	1.14462e+07
High	Master Protein	P06756	Integrin alpha-V [OS=Homo sapiens]	>ProteinCenter:SwissProt|P06756 Integrin alpha-V [OS=Homo sapiens]	0	FALSE	64.768	21	19	21	56	19	1048	116	5.68	59.09	19	cell differentiation;cell growth;cell organization and biogenesis;cellular component movement;cellular homeostasis;metabolic process;regulation of biological process;response to stimulus;transport	cell surface;cytosol;membrane	metal ion binding;protein binding;receptor activity;signal transducer activity;transporter activity	Pf01839, Pf08441, Pf13517	3685	ENSG00000138448.11	ITGAV	2	Regulation of actin cytoskeleton; Thyroid hormone signaling pathway; Small cell lung cancer; Arrhythmogenic right ventricular cardiomyopathy (ARVC); Phagosome; ECM-receptor interaction; Dilated cardiomyopathy; Focal adhesion; PI3K-Akt signaling pathway; Cell adhesion molecules (CAMs); Proteoglycans in cancer; Hypertrophic cardiomyopathy (HCM); Pathways in cancer	Integrin cell surface interactions; Signal transduction by L1; PECAM1 interactions; Cross-presentation of particulate exogenous antigens (phagosomes); VEGFA-VEGFR2 Pathway; Molecules associated with elastic fibres; Syndecan interactions; ECM proteoglycans; Laminin interactions; Neutrophil degranulation	Osteopontin Signaling; Integrin-mediated Cell Adhesion; Arrhythmogenic Right Ventricular Cardiomyopathy; Primary Focal Segmental Glomerulosclerosis FSGS; Focal Adhesion; Osteoblast Signaling; MFAP5-mediated ovarian cancer cell motility and invasiveness; VEGFA-VEGFR2 Signaling Pathway; Focal Adhesion-PI3K-Akt-mTOR-signaling pathway	48	0.614	0.855	2.345	3.336	2.984	0.306	0.247	0.201	84.4	61.2	80.3	163.3	222.3	219.1	28.3	23.3	17.8	1.19152e+08	8.64128e+07	1.13407e+08
High	Master Protein	P02070	SWISS-PROT:P02070 (Bos taurus) Hemoglobin subunit beta	>P02070 SWISS-PROT:P02070 (Bos taurus) Hemoglobin subunit beta	0	TRUE	64.516	69	11	15	222	7	145	15.9	7.59	203.66	11	transport		metal ion binding;transporter activity	Pf00042	100850059; 280813	ENSBTAG00000038748.2	LOC100850059; HBB	15	Malaria; African trypanosomiasis	Erythrocytes take up carbon dioxide and release oxygen; Scavenging of heme from plasma; Factors involved in megakaryocyte development and platelet production; Neutrophil degranulation; Erythrocytes take up oxygen and release carbon dioxide	Folate Metabolism; Vitamin B12 Metabolism; Selenium Micronutrient Network	17	0.935	0.864	0.815	0.639	1.286	0.654	0.499	0.463	121.6	117.7	111.4	105.1	73.3	145	82.1	81.8	62	2.0838e+08	2.01718e+08	1.90813e+08
High	Master Protein	O94832	Unconventional myosin-Id [OS=Homo sapiens]	>ProteinCenter:SwissProt|O94832 Unconventional myosin-Id [OS=Homo sapiens]	0	FALSE	64.081	19	17	17	48	17	1006	116.1	9.39	55.32	17	regulation of biological process;transport	cytosol;endoplasmic reticulum;endosome;membrane	catalytic activity;motor activity;nucleotide binding;protein binding	Pf00063, Pf06017	4642	ENSG00000176658.16	MYO1D	17				0	0.641	0.539	5.236	6.703	5.273	1.109	2.384	1.728	33.8	20	18.9	170.4	255.1	196.7	47.9	81.3	76.1	4.09281e+07	2.41799e+07	2.28862e+07
High	Master Protein	P17301	Integrin alpha-2 [OS=Homo sapiens]	>ProteinCenter:SwissProt|P17301 Integrin alpha-2 [OS=Homo sapiens]	0	FALSE	63.72	18	17	18	56	17	1181	129.2	5.31	51.7	17	cell differentiation;cell organization and biogenesis;cell proliferation;cellular component movement;coagulation;regulation of biological process;response to stimulus	cell surface;membrane;nucleus	metal ion binding;protein binding;receptor activity;signal transducer activity	Pf00092, Pf01839, Pf08441, Pf13517, Pf13519	3673		ITGA2	5	Proteoglycans in cancer; Hypertrophic cardiomyopathy (HCM); Hematopoietic cell lineage; Regulation of actin cytoskeleton; Platelet activation; Pathways in cancer; Small cell lung cancer; Phagosome; ECM-receptor interaction; Arrhythmogenic right ventricular cardiomyopathy (ARVC); Focal adhesion; PI3K-Akt signaling pathway; Dilated cardiomyopathy	ECM proteoglycans; CHL1 interactions; Integrin cell surface interactions; Laminin interactions; MET activates PTK2 signaling; Platelet Adhesion to exposed collagen; Syndecan interactions	Integrin-mediated Cell Adhesion; Arrhythmogenic Right Ventricular Cardiomyopathy; Interleukin-11 Signaling Pathway; Focal Adhesion; TGF-beta Signaling Pathway	35	0.751	0.719	3.105	3.965	3.151	0.222	0.405	0.241	75.9	62.4	59.1	184.1	253.2	193.1	21.1	26.5	24.5	1.40788e+08	1.15782e+08	1.09581e+08
High	Master Protein	Q14254	Flotillin-2 [OS=Homo sapiens]	>ProteinCenter:SwissProt|Q14254 Flotillin-2 [OS=Homo sapiens]	0	FALSE	63.491	41	16	16	55	16	428	47	5.25	53.67	16	cell organization and biogenesis;regulation of biological process	cytoskeleton;endosome;membrane	protein binding	Pf01145	2319	ENSG00000132589.15	FLOT2	17	Insulin signaling pathway	Synaptic adhesion-like molecules	Angiopoietin Like Protein 8 Regulatory Pathway; Insulin Signaling	6	0.809	0.74	1.182	1.686	1.425	1.257	1.526	0.847	103.4	86.5	96.4	84.5	95.5	88.4	144	97.8	103.5	1.579e+08	1.32048e+08	1.47225e+08
High	Master Protein	P26006	Integrin alpha-3 [OS=Homo sapiens]	>ProteinCenter:SwissProt|P26006 Integrin alpha-3 [OS=Homo sapiens]	0	FALSE	63.239	16	15	18	52	15	1051	116.5	6.77	51.98	15	cell differentiation;cell organization and biogenesis;cellular component movement;regulation of biological process;response to stimulus	cell surface;membrane	metal ion binding;protein binding	Pf01839, Pf08441, Pf13517	3675	ENSG00000005884.17	ITGA3	17	Focal adhesion; Dilated cardiomyopathy; Hypertrophic cardiomyopathy (HCM); Small cell lung cancer; Pathways in cancer; Arrhythmogenic right ventricular cardiomyopathy (ARVC); PI3K-Akt signaling pathway; Regulation of actin cytoskeleton; Hematopoietic cell lineage; ECM-receptor interaction	Integrin cell surface interactions; Laminin interactions; Basigin interactions; MET activates PTK2 signaling	Integrin-mediated Cell Adhesion; Arrhythmogenic Right Ventricular Cardiomyopathy; Primary Focal Segmental Glomerulosclerosis FSGS; Focal Adhesion; Focal Adhesion-PI3K-Akt-mTOR-signaling pathway	26	0.817	0.956	0.444	0.509	0.585	0.022	0.017	0.012	223.8	177.8	242.3	66.4	89.9	88.7	5.3	3.1	2.7	5.83415e+08	4.63406e+08	6.31664e+08
High	Master Protein	P29317	Ephrin type-A receptor 2 [OS=Homo sapiens]	>ProteinCenter:SwissProt|P29317 Ephrin type-A receptor 2 [OS=Homo sapiens]	0	FALSE	63.106	18	20	20	67	18	976	108.2	6.23	54.09	20	cell death;cell differentiation;cell organization and biogenesis;cell proliferation;cellular component movement;defense response;development;metabolic process;regulation of biological process;response to stimulus	cell surface;membrane	catalytic activity;nucleotide binding;protein binding;receptor activity;signal transducer activity	Pf00041, Pf00069, Pf00536, Pf01404, Pf07647, Pf07699, Pf07714, Pf09294, Pf14575	1969	ENSG00000142627.12	EPHA2	1	Rap1 signaling pathway; Axon guidance; Ras signaling pathway; PI3K-Akt signaling pathway	EPH-ephrin mediated repulsion of cells; EPHA-mediated growth cone collapse	NRF2 pathway; Focal Adhesion-PI3K-Akt-mTOR-signaling pathway	11	0.711	0.648	0.886	1.186	1.153	0.757	0.969	0.749	108.7	81.8	74.7	87.5	128.3	110.9	91.4	132	84.7	2.48509e+08	1.87054e+08	1.70695e+08
High	Master Protein	ENSEMBL:ENSBTAP00000018574	(Bos taurus) 55 kDa protein	>ENSEMBL:ENSBTAP00000018574 (Bos taurus) 55 kDa protein	0	TRUE	62.422	35	17	17	71	17	496	55.2	6.86	64.89	17												0	0.812	0.654	0.468	0.37	0.578	0.427	0.529	0.432	146.9	126.5	127.1	68.4	59.5	106.1	101.1	77.5	86.9	8.63441e+08	7.43918e+08	7.47111e+08
High	Master Protein	P29144	Tripeptidyl-peptidase 2 [OS=Homo sapiens]	>ProteinCenter:SwissProt|P29144 Tripeptidyl-peptidase 2 [OS=Homo sapiens]	0	FALSE	62.362	15	17	18	61	17	1249	138.3	6.32	71.08	17	metabolic process	cytoplasm;cytosol;nucleus	catalytic activity;protein binding	Pf00082, Pf12580, Pf13739	7174	ENSG00000134900.11	TPP2	13		Antigen processing: Ubiquitination & Proteasome degradation		4	0.918	0.999	1.749	2.051	2.038	4.57	5.158	3.503	39.5	36.7	39	70.1	80.5	81.1	191.8	214.1	147.2	4.27726e+07	3.97865e+07	4.22746e+07
High	Master Protein	P35609	Alpha-actinin-2 [OS=Homo sapiens]	>ProteinCenter:SwissProt|P35609 Alpha-actinin-2 [OS=Homo sapiens]	0	FALSE	62.211	12	10	14	57	1	894	103.8	5.45	76.62	10	cell organization and biogenesis;cellular component movement;metabolic process;regulation of biological process;response to stimulus;transport	cytoplasm;cytoskeleton;cytosol;extracellular;membrane;organelle lumen	metal ion binding;protein binding;structural molecule activity	Pf00307, Pf00435, Pf08726, Pf11971, Pf13499, Pf13833	88	ENSG00000077522.12	ACTN2	1	Regulation of actin cytoskeleton; Amoebiasis; Systemic lupus erythematosus; Focal adhesion; Arrhythmogenic right ventricular cardiomyopathy (ARVC); Viral carcinogenesis; Leukocyte transendothelial migration; Adherens junction; Tight junction	Ras activation uopn Ca2+ infux through NMDA receptor; Platelet degranulation ; Nephrin family interactions; Unblocking of NMDA receptor, glutamate binding and activation; RAF/MAP kinase cascade; CREB phosphorylation through the activation of CaMKII; Striated Muscle Contraction; Interleukin-20 family signaling	Arrhythmogenic Right Ventricular Cardiomyopathy; Striated Muscle Contraction	36	0.01	3.638	13.066	18.017	10.347	12.548	59.437	22.376	6.4		23.3	83.7	115.5	66.3	80.4	380.9	143.4	629918		2.29174e+06
High	Master Protein	P31939	bifunctional purine biosynthesis protein purH [OS=Homo sapiens]	>ProteinCenter:SwissProt|P31939 bifunctional purine biosynthesis protein purH [OS=Homo sapiens]	0	FALSE	62.018	35	18	20	72	18	592	64.6	6.71	60.69	18	metabolic process;response to stimulus	cytosol;membrane;mitochondrion	catalytic activity;protein binding	Pf01808, Pf02142	471	ENSG00000138363.14	ATIC	2	Purine metabolism; One carbon pool by folate; Metabolic pathways; Antifolate resistance	Purine ribonucleoside monophosphate biosynthesis	One Carbon Metabolism	9	1.002	0.934	2.429	1.853	1.692	1.182	1.531	1.871	63.9	67.9	80.2	159.2	115.9	100.6	81.4	110.2	120.6	1.38273e+08	1.46842e+08	1.7334e+08
High	Master Protein	P04083	annexin A1 [OS=Homo sapiens]	>ProteinCenter:SwissProt|P04083 annexin A1 [OS=Homo sapiens]	0	FALSE	61.532	41	15	16	65	15	346	38.7	7.02	53.55	15	cell differentiation;cell organization and biogenesis;cellular component movement;defense response;metabolic process;regulation of biological process;response to stimulus;transport	cell surface;cytoplasm;cytoskeleton;cytosol;endosome;extracellular;membrane;nucleus;vacuole	catalytic activity;DNA binding;enzyme regulator activity;metal ion binding;protein binding;RNA binding;structural molecule activity	Pf00191	301	ENSG00000135046.13	ANXA1	9		Gastrin-CREB signalling pathway via PKC and MAPK; G alpha (i) signalling events; Smooth Muscle Contraction; Interleukin-4 and 13 signaling; Formyl peptide receptors bind formyl peptides and many other ligands	Integrated Breast Cancer Pathway; Spinal Cord Injury; VEGFA-VEGFR2 Signaling Pathway; Prostaglandin Synthesis and Regulation	20	0.75	0.747	0.956	1.244	0.709	0.06	0.139	0.127	152.7	112.2	124.9	136.8	220.6	100.3	12.3	17.1	23.1	3.68076e+08	2.70296e+08	3.0108e+08
High	Master Protein	P16403	Histone H1.2 [OS=Homo sapiens]	>ProteinCenter:SwissProt|P16403 Histone H1.2 [OS=Homo sapiens]	0	FALSE	61.294	39	11	13	73	2	213	21.4	10.93	72.62	11	cell organization and biogenesis;metabolic process;regulation of biological process	chromosome;nucleus	DNA binding;protein binding;RNA binding	Pf00538	3006	ENSG00000187837.3	HIST1H1C	6		Formation of Senescence-Associated Heterochromatin Foci (SAHF); Activation of DNA fragmentation factor		10	1.346	1.163	0.796	0.198	0.135	3.453	0.343	0.937	66.7	89.8	77.6	53.1	13.2	9	308.7	194.5	87.4	1.26433e+07	1.70239e+07	1.46987e+07
High	Master Protein	Q9NZN3	EH domain-containing protein 3 [OS=Homo sapiens]	>ProteinCenter:SwissProt|Q9NZN3 EH domain-containing protein 3 [OS=Homo sapiens]	0	FALSE	60.722	23	16	16	96	3	535	60.8	6.57	92.8	16	cell organization and biogenesis;coagulation;metabolic process;regulation of biological process;transport	cytoplasm;cytosol;endosome;membrane;nucleus	metal ion binding;nucleotide binding;protein binding	Pf00350, Pf01926, Pf12763	30845	ENSG00000013016.15	EHD3	2	Endocytosis	Factors involved in megakaryocyte development and platelet production		3	1.307	1.406	0.545	0.395	0.991	1.39	0.61	1.042	100	134.9	142.1	54.5	41.3	112.7	140.7	66	107.8	4.05883e+07	5.47882e+07	5.76902e+07
High	Master Protein	P40227-1	T-complex protein 1 subunit zeta [OS=Homo sapiens]	>ProteinCenter:SwissProt|P40227-1 T-complex protein 1 subunit zeta [OS=Homo sapiens]	0	FALSE	60.432	34	16	17	62	16	531	58	6.68	70.65	16	metabolic process;regulation of biological process	cytoplasm;cytosol;membrane	nucleotide binding;protein binding;RNA binding	Pf00118, Pf05504	908	ENSG00000146731.10	CCT6A	7		Prefoldin mediated transfer of substrate to CCT/TriC; Cooperation of PDCL (PhLP1) and TRiC/CCT in G-protein beta folding; Association of TriC/CCT with target proteins during biosynthesis; Formation of tubulin folding intermediates by CCT/TriC; Folding of actin by CCT/TriC		9	1.058	1.157	0.825	0.828	0.637	1.195	1.754	1.845	86.7	90.2	98.5	68.7	76.2	54.5	112.4	152.7	160.2	2.25982e+08	2.3512e+08	2.56872e+08
High	Master Protein	Q7L576-2	Isoform 2 of Cytoplasmic FMR1-interacting protein 1 [OS=Homo sapiens]	>ProteinCenter:SwissProt|Q7L576-2 Isoform 2 of Cytoplasmic FMR1-interacting protein 1 [OS=Homo sapiens]	0	FALSE	60.1	16	13	13	67	1	822	94.4	7.06	73.58	13	cell growth;cell organization and biogenesis;regulation of biological process;response to stimulus;transport	cytosol;extracellular;organelle lumen	protein binding;RNA binding	Pf05994	23191	ENSG00000273749.4	CYFIP1	15			Brain-Derived Neurotrophic Factor (BDNF) signaling pathway; G13 Signaling Pathway	2			100	100	100							291.3	378.4	230.3
High	Master Protein	P24821	Tenascin [OS=Homo sapiens]	>ProteinCenter:SwissProt|P24821 Tenascin [OS=Homo sapiens]	0	FALSE	59.947	10	19	19	33	19	2201	240.7	4.89	32.16	19	cell communication;cell differentiation;cell organization and biogenesis;metabolic process;regulation of biological process;response to stimulus	extracellular;membrane;organelle lumen	protein binding	Pf00041, Pf00147, Pf07974	3371	ENSG00000041982.15	TNC	9	PI3K-Akt signaling pathway; Focal adhesion; ECM-receptor interaction; MicroRNAs in cancer	ECM proteoglycans; Post-translational protein phosphorylation; Integrin cell surface interactions; Regulation of Insulin-like Growth Factor (IGF) transport and uptake by Insulin-like Growth Factor Binding Proteins (IGFBPs); Syndecan interactions	Focal Adhesion; TGF-beta Signaling Pathway; Amplification and Expansion of Oncogenic Pathways as Metastatic Traits; TGF-B Signaling in Thyroid Cells for Epithelial-Mesenchymal Transition; Focal Adhesion-PI3K-Akt-mTOR-signaling pathway	18	1.369	1.145	1.215	0.55	1.284	21.817	11.227	51.737	3	2.6	3.2	3.4	0.7	4.7	174.2	116.4	591.7	3.24355e+06	2.80497e+06	3.43571e+06
High	Master Protein	O43490-1	Prominin-1 [OS=Homo sapiens]	>ProteinCenter:SwissProt|O43490-1 Prominin-1 [OS=Homo sapiens]	0	FALSE	59.593	18	15	15	57	15	865	97.1	7.27	59.78	15	cell differentiation;regulation of biological process	cell surface;endoplasmic reticulum;membrane	protein binding	Pf05478	8842	ENSG00000007062.11	PROM1	4	Transcriptional misregulation in cancer		Extracellular vesicle-mediated signaling in recipient cells	2	0.824	1.088	0.765	0.683	0.817	0.615	0.428	0.171	141.9	122.8	159.4	96.8	82.5	94.1	104.6	62.1	35.7	1.8344e+08	1.5878e+08	2.06049e+08
High	Master Protein	P11413-1	Glucose-6-phosphate 1-dehydrogenase [OS=Homo sapiens]	>ProteinCenter:SwissProt|P11413-1 Glucose-6-phosphate 1-dehydrogenase [OS=Homo sapiens]	0	FALSE	58.981	36	14	15	42	14	515	59.2	6.84	31.65	14	metabolic process;regulation of biological process;response to stimulus	cytoplasm;cytosol;membrane;nucleus	catalytic activity;nucleotide binding;protein binding	Pf00479, Pf02781	2539	ENSG00000160211.15	G6PD	X	Central carbon metabolism in cancer; Pentose phosphate pathway; Carbon metabolism; Metabolic pathways; Glutathione metabolism	TP53 Regulates Metabolic Genes; Pentose phosphate pathway (hexose monophosphate shunt)	Glutathione metabolism; Pentose Phosphate Pathway; Cori Cycle; NRF2 pathway; ATM Signaling Network in Development and Disease; Sulfation Biotransformation Reaction	19	0.866	0.759	5.791	5.157	2.577	0.597	0.961	1.171	50	41.7	43.4	257.2	246.2	132	28.5	49.4	51.6	7.61623e+07	6.35271e+07	6.61334e+07
High	Master Protein	Q99816	tumor susceptibility gene 101 protein [OS=Homo sapiens]	>ProteinCenter:SwissProt|Q99816 tumor susceptibility gene 101 protein [OS=Homo sapiens]	0	FALSE	58.897	30	14	15	81	14	390	43.9	6.46	84.5	14	cell communication;cell differentiation;cell division;cell organization and biogenesis;metabolic process;regulation of biological process;response to stimulus;transport	cytoplasm;cytoskeleton;cytosol;endosome;membrane;nucleus	DNA binding;protein binding	Pf03148, Pf04111, Pf04156, Pf05743, Pf07798, Pf09454, Pf11932, Pf12325, Pf13863, Pf15346	7251	ENSG00000074319.12	TSG101	11	Endocytosis	Budding and maturation of HIV virion; Endosomal Sorting Complex Required For Transport (ESCRT); Membrane binding and targetting of GAG proteins		13	0.779	0.674	0.827	0.973	1.315	1.177	1.287	0.629	99.7	68.2	71.4	88.7	108.7	153.5	108.7	147.1	54.1	3.57918e+08	2.4488e+08	2.56447e+08
High	Master Protein	Q02878	60S ribosomal protein L6 [OS=Homo sapiens]	>ProteinCenter:SwissProt|Q02878 60S ribosomal protein L6 [OS=Homo sapiens]	0	FALSE	58.357	38	11	13	80	11	288	32.7	10.58	66.94	11	cell organization and biogenesis;metabolic process;regulation of biological process;transport	cytosol;membrane;nucleus;ribosome	DNA binding;protein binding;RNA binding;structural molecule activity	Pf01159, Pf03868	6128	ENSG00000089009.15	RPL6	12	Ribosome	Peptide chain elongation; Eukaryotic Translation Termination; Viral mRNA Translation; L13a-mediated translational silencing of Ceruloplasmin expression; Nonsense Mediated Decay (NMD) independent of the Exon Junction Complex (EJC); Selenocysteine synthesis; Nonsense Mediated Decay (NMD) enhanced by the Exon Junction Complex (EJC); GTP hydrolysis and joining of the 60S ribosomal subunit; Major path…	Cytoplasmic Ribosomal Proteins	34	0.839	0.961	1.598	1.528	0.805	1.192	1.526	1.554	74.5	63.1	73.2	151.9	127.7	72.4	92.4	127.2	117.5	1.87962e+08	1.59254e+08	1.84605e+08
High	Master Protein	P09525	annexin A4 [OS=Homo sapiens]	>ProteinCenter:SwissProt|P09525 annexin A4 [OS=Homo sapiens]	0	FALSE	58.226	48	14	15	64	14	319	35.9	6.13	61.35	14	cell differentiation;regulation of biological process;response to stimulus	cell surface;cytoplasm;membrane;nucleus	enzyme regulator activity;metal ion binding;protein binding	Pf00191	307		ANXA4	2			Prostaglandin Synthesis and Regulation	1	0.973	0.837	10.664	21.822	10.133	1.759	3.544	1.712	16.2	15.9	15.9	194.3	365	172.1	30.9	56.7	33	4.22535e+07	4.15528e+07	4.15003e+07
High	Master Protein	Q9Y2A7-1	Nck-associated protein 1 [OS=Homo sapiens]	>ProteinCenter:SwissProt|Q9Y2A7-1 Nck-associated protein 1 [OS=Homo sapiens]	0	FALSE	57.809	19	21	21	38	20	1128	128.7	6.62	33.25	21	cell death;cell organization and biogenesis;regulation of biological process;response to stimulus	cytosol;membrane	protein binding	Pf09735	10787	ENSG00000061676.14	NCKAP1	2	Regulation of actin cytoskeleton	Regulation of actin dynamics for phagocytic cup formation; VEGFA-VEGFR2 Pathway; RHO GTPases Activate WASPs and WAVEs	Exercise-induced Circadian Regulation; Regulation of Actin Cytoskeleton	14	0.627	0.54	3.284	4.951	4.07	0.609	1.006	0.833	47.6	31.8	28.1	186.2	271.7	196.5	34.7	54.5	48.9	4.69366e+07	3.13138e+07	2.77209e+07
High	Master Protein	O75340	programmed cell death protein 6 [OS=Homo sapiens]	>ProteinCenter:SwissProt|O75340 programmed cell death protein 6 [OS=Homo sapiens]	0	FALSE	57.556	76	11	13	52	11	191	21.9	5.4	30.31	11	cell death;cell organization and biogenesis;metabolic process;regulation of biological process;response to stimulus;transport	cytoplasm;endoplasmic reticulum;endosome;membrane;nucleus	catalytic activity;metal ion binding;protein binding	Pf00036, Pf13405, Pf13499, Pf13833	10016	ENSG00000249915.7	PDCD6	5				0	0.859	0.57	1.358	2.203	1.649	2.56	1.976	1.255	68.1	56.9	53.7	90.4	136.8	101.9	166.8	128.9	96.5	3.69153e+08	3.08581e+08	2.91025e+08
High	Master Protein	Q16778	Histone H2B type 2-E [OS=Homo sapiens]	>ProteinCenter:SwissProt|Q16778 Histone H2B type 2-E [OS=Homo sapiens]	0	FALSE	57.442	52	7	12	97	2	126	13.9	10.32	104.6	7	cell organization and biogenesis;defense response;response to stimulus	chromosome;cytosol;nucleus	DNA binding;protein binding	Pf00125, Pf00808	8349	ENSG00000184678.10	HIST2H2BE	1	Systemic lupus erythematosus; Alcoholism; Viral carcinogenesis	SIRT1 negatively regulates rRNA expression; Nonhomologous End-Joining (NHEJ); Activation of anterior HOX genes in hindbrain development during early embryogenesis; NoRC negatively regulates rRNA expression; Meiotic synapsis; Transcriptional regulation by small RNAs; Meiotic recombination; PRC2 methylates histones and DNA; Recruitment and ATM-mediated phosphorylation of repair and signaling protei…		75	1.054	0.991	1.303	1.618	1.862	1.395	1.507	0.66	90.2	94.3	92	118.2	141.2	162.5	78.9	85.3	37.4	2.31543e+08	2.41874e+08	2.36051e+08
High	Master Protein	P06737-1	Glycogen phosphorylase, liver form [OS=Homo sapiens]	>ProteinCenter:SwissProt|P06737-1 Glycogen phosphorylase, liver form [OS=Homo sapiens]	0	FALSE	57.428	21	18	18	53	13	847	97.1	7.17	47.79	18	cell death;metabolic process;transport	cytoplasm;cytosol;extracellular;organelle lumen	catalytic activity;nucleotide binding;protein binding	Pf00343	5836	ENSG00000100504.16	PYGL	14	Starch and sucrose metabolism; Insulin signaling pathway; Metabolic pathways; Glucagon signaling pathway; Insulin resistance	Neutrophil degranulation; Glycogen breakdown (glycogenolysis)	TNF alpha Signaling Pathway; Glycogen Metabolism	14	1.058	1.213	0.571	0.565	1.065	0.932	1.122	0.618	128.5	131.3	161.5	50.4	43.1	87.8	121.4	91.7	84.5	2.2811e+08	2.33054e+08	2.8672e+08
High	Master Protein	P11216	Glycogen phosphorylase, brain form [OS=Homo sapiens]	>ProteinCenter:SwissProt|P11216 Glycogen phosphorylase, brain form [OS=Homo sapiens]	0	FALSE	57.253	26	18	18	53	13	843	96.6	6.86	58.64	18	metabolic process;transport	cytoplasm;extracellular;membrane;organelle lumen	catalytic activity;protein binding	Pf00343	5834	ENSG00000100994.11	PYGB	20	Insulin resistance; Starch and sucrose metabolism; Insulin signaling pathway; Metabolic pathways; Glucagon signaling pathway	Neutrophil degranulation; Glycogen breakdown (glycogenolysis)	Glycogen Metabolism	13	0.755	0.969	4.521	6.254	8.125	0.973	2.407	1.177	52.7	38.7	36.7	160.9	203.9	121.4	54.3	137.1	94.3	9.2467e+07	6.79837e+07	6.43302e+07
High	Master Protein	P05556-1	Integrin beta-1 [OS=Homo sapiens]	>ProteinCenter:SwissProt|P05556-1 Integrin beta-1 [OS=Homo sapiens]	0	FALSE	57.086	18	13	15	61	13	798	88.4	5.39	46.71	13	cell differentiation;cell growth;cell organization and biogenesis;cellular component movement;defense response;metabolic process;regulation of biological process;response to stimulus;transport	cell surface;cytoplasm;endosome;membrane	enzyme regulator activity;metal ion binding;protein binding;receptor activity;signal transducer activity	Pf00362, Pf07965, Pf08725	3688	ENSG00000150093.18	ITGB1	10	Small cell lung cancer; Proteoglycans in cancer; Pathways in cancer; Dilated cardiomyopathy; PI3K-Akt signaling pathway; Leukocyte transendothelial migration; Phagosome; Rap1 signaling pathway; Platelet activation; Arrhythmogenic right ventricular cardiomyopathy (ARVC); ECM-receptor interaction; Pertussis; Bacterial invasion of epithelial cells; Cell adhesion molecules (CAMs); Shigellosis; Regula…	Integrin cell surface interactions; Signal transduction by L1; Basigin interactions; MET activates PTK2 signaling; Molecules associated with elastic fibres; Platelet Adhesion to exposed collagen; Syndecan interactions; CHL1 interactions; ECM proteoglycans; Laminin interactions; Localization of the PINCH-ILK-PARVIN complex to focal adhesions; Immunoregulatory interactions between a Lymphoid and a …	Integrin-mediated Cell Adhesion; Prolactin Signaling Pathway; Neural Crest Differentiation; Arrhythmogenic Right Ventricular Cardiomyopathy; Pathogenic Escherichia coli infection; Primary Focal Segmental Glomerulosclerosis FSGS; Focal Adhesion; Signaling of Hepatocyte Growth Factor Receptor; Rac1/Pak1/p38/MMP-2 pathway; TGF-beta Signaling Pathway; Factors and pathways affecting insulin-like growt…	74	0.676	0.932	0.912	1.341	1.407	0.254	0.465	0.217	145.8	113.3	141.9	109	143.8	123.6	43.4	43	36.3	1.14432e+09	8.8929e+08	1.11398e+09
High	Master Protein	Q13576-1	Ras GTPase-activating-like protein IQGAP2 [OS=Homo sapiens]	>ProteinCenter:SwissProt|Q13576-1 Ras GTPase-activating-like protein IQGAP2 [OS=Homo sapiens]	0	FALSE	56.736	13	19	20	40	17	1575	180.5	5.64	44.75	19	cell organization and biogenesis;regulation of biological process;response to stimulus;transport	cell surface;cytoplasm;cytoskeleton;cytosol;membrane	enzyme regulator activity;protein binding	Pf00307, Pf00616, Pf03836	10788	ENSG00000145703.15	IQGAP2	5	Regulation of actin cytoskeleton	RHO GTPases activate IQGAPs; Neutrophil degranulation	G13 Signaling Pathway	9	0.724	0.981	7.005	5.34	3.872	0.951	0.41	0.731	15.4	13.8	17.2	240	347.2	224.8	20.7	8	13.1	7.27586e+06	6.51743e+06	8.13865e+06
High	Master Protein	P05534	HLA class I histocompatibility antigen, A-24 alpha chain [OS=Homo sapiens]	>ProteinCenter:SwissProt|P05534 HLA class I histocompatibility antigen, A-24 alpha chain [OS=Homo sapiens]	0	FALSE	56.32	31	12	13	48	4	365	40.7	6.34	66.44	12	regulation of biological process;response to stimulus	cell surface;endoplasmic reticulum;Golgi;membrane	protein binding;RNA binding	Pf00129, Pf07654	3105		HLA-A	6		Interferon alpha/beta signaling; ER-Phagosome pathway; Immunoregulatory interactions between a Lymphoid and a non-Lymphoid cell; Endosomal/Vacuolar pathway; Interferon gamma signaling; Antigen Presentation: Folding, assembly and peptide loading of class I MHC	Proteasome Degradation; Allograft Rejection	14			100	100	100	100	100	100				173.1	154.6	141.8	156.7	133.3	140.6
High	Master Protein	P16402	Histone H1.3 [OS=Homo sapiens]	>ProteinCenter:SwissProt|P16402 Histone H1.3 [OS=Homo sapiens]	0	FALSE	56.248	36	10	12	62	1	221	22.3	11.02	64.32	10	cell organization and biogenesis;metabolic process;regulation of biological process	chromosome;nucleus	DNA binding;RNA binding	Pf00538	3007	ENSG00000124575.6	HIST1H1D	6		Formation of Senescence-Associated Heterochromatin Foci (SAHF); Activation of DNA fragmentation factor		10					100	100	100	100						164.5	295.6	276.6	163.3
High	Master Protein	Q0V8M9	TREMBL:Q0V8M9;Q9TRI0 (Bos taurus) similar to inter-alpha (globulin) inhibitor H3 isoform 2	>Q0V8M9 TREMBL:Q0V8M9;Q9TRI0 (Bos taurus) similar to inter-alpha (globulin) inhibitor H3 isoform 2	0	TRUE	55.868	16	12	13	73	12	891	99.5	5.96	83.94	12												0	1.007	0.763	0.452	0.33	0.601	0.543	0.273	0.639	167.2	167.9	132.5	67.8	39.9	90.1	94.5	40.3	99.8	3.67496e+08	3.69153e+08	2.91184e+08
High	Master Protein	P50552	Vasodilator-stimulated phosphoprotein [OS=Homo sapiens]	>ProteinCenter:SwissProt|P50552 Vasodilator-stimulated phosphoprotein [OS=Homo sapiens]	0	FALSE	55.473	38	12	13	48	12	380	39.8	8.94	53.25	12	cell organization and biogenesis;cellular component movement;regulation of biological process	cytoplasm;cytoskeleton;cytosol;membrane	protein binding	Pf00568	7408	ENSG00000125753.13	VASP	19	Leukocyte transendothelial migration; cGMP-PKG signaling pathway; Platelet activation; Focal adhesion; Fc gamma R-mediated phagocytosis; Rap1 signaling pathway	Cell-extracellular matrix interactions; Generation of second messenger molecules; Signaling by ROBO receptors	Integrin-mediated Cell Adhesion; Focal Adhesion	18	0.779	0.952	1.748	3.158	1.749	1.114	0.738	1.565	70.3	73.6	79	165.4	165.3	114.5	77.1	59.3	95.5	1.166e+08	1.2219e+08	1.31133e+08
High	Master Protein	O75054	Immunoglobulin superfamily member 3 [OS=Homo sapiens]	>ProteinCenter:SwissProt|O75054 Immunoglobulin superfamily member 3 [OS=Homo sapiens]	0	FALSE	55.419	18	17	17	47	17	1194	135.1	6.07	40.59	17	regulation of biological process;response to stimulus	cell surface;membrane		Pf07679	3321	ENSG00000143061.17	IGSF3	1				0	0.777	0.743	1.589	2.341	2.27	0.432	0.49	0.239	91.1	71.1	67.5	160.2	207.8	210.8	41.1	35.8	14.5	6.36042e+07	4.96252e+07	4.70701e+07
High	Master Protein	O15438-1	Canalicular multispecific organic anion transporter 2 [OS=Homo sapiens]	>ProteinCenter:SwissProt|O15438-1 Canalicular multispecific organic anion transporter 2 [OS=Homo sapiens]	0	FALSE	55.282	12	14	14	32	13	1527	169.2	7.2	38.25	14	transport	membrane	catalytic activity;nucleotide binding;transporter activity	Pf00005, Pf00664	8714	ENSG00000108846.15	ABCC3	17	Bile secretion; Antifolate resistance; ABC transporters	ABC-family proteins mediated transport; Recycling of bile acids and salts	Fluoropyrimidine Activity; Codeine and Morphine Metabolism; Drug Induction of Bile Acid Pathway; Constitutive Androstane Receptor Pathway; NRF2 pathway; Nuclear Receptors in Lipid Metabolism and Toxicity; Photodynamic therapy-induced NFE2L2 (NRF2) survival signaling	17		100	100	100	100						0.8	298	363.7	237.5						255132
High	Master Protein	P21399	Cytoplasmic aconitate hydratase [OS=Homo sapiens]	>ProteinCenter:SwissProt|P21399 Cytoplasmic aconitate hydratase [OS=Homo sapiens]	0	FALSE	55.063	22	14	15	57	14	889	98.3	6.68	53.81	14	cellular homeostasis;metabolic process;regulation of biological process;response to stimulus;transport	cytoplasm;cytosol;endoplasmic reticulum;Golgi;mitochondrion	catalytic activity;metal ion binding;protein binding;RNA binding	Pf00330, Pf00694	48	ENSG00000122729.18	ACO1	9	Metabolic pathways; Carbon metabolism; 2-Oxocarboxylic acid metabolism; Citrate cycle (TCA cycle); Glyoxylate and dicarboxylate metabolism; Biosynthesis of amino acids	Iron uptake and transport	Iron metabolism in placenta; TCA Cycle and Deficiency of Pyruvate Dehydrogenase complex (PDHc)	10	0.845	0.726	0.634	0.514	1.029	0.499	0.506	0.52	140.3	136.2	134.3	87.2	57.1	110.7	91.3	63.4	79.6	1.91018e+08	1.85482e+08	1.82798e+08
High	Master Protein	Q15758-1	Neutral amino acid transporter B(0) [OS=Homo sapiens]	>ProteinCenter:SwissProt|Q15758-1 Neutral amino acid transporter B(0) [OS=Homo sapiens]	0	FALSE	54.975	31	14	14	66	14	541	56.6	5.48	65.01	14	transport	membrane	protein binding;receptor activity;transporter activity	Pf00375	6510	ENSG00000105281.12	SLC1A5	19	Protein digestion and absorption; Central carbon metabolism in cancer	Amino acid transport across the plasma membrane	TYROBP Causal Network	7	0.576	0.46	2.274	8.015	3.735	2.579	5.503	2.527	36.1	22	20.2	66.1	173.3	92.8	102.4	256.2	130.9	1.49038e+08	9.07617e+07	8.31813e+07
High	Master Protein	Q99832	T-complex protein 1 subunit eta [OS=Homo sapiens]	>ProteinCenter:SwissProt|Q99832 T-complex protein 1 subunit eta [OS=Homo sapiens]	0	FALSE	54.731	36	17	17	48	17	543	59.3	7.65	49.85	17	metabolic process;regulation of biological process;transport	cytoplasm;cytosol;mitochondrion	nucleotide binding;protein binding	Pf00118	10574	ENSG00000135624.15	CCT7	2		Prefoldin mediated transfer of substrate to CCT/TriC; Cooperation of PDCL (PhLP1) and TRiC/CCT in G-protein beta folding; Association of TriC/CCT with target proteins during biosynthesis; Formation of tubulin folding intermediates by CCT/TriC; Folding of actin by CCT/TriC		9	1.019	0.906	1.069	0.962	0.805	1.047	1.315	1.688	89.9	95.6	106.9	79.9	69	56	107.6	138.9	156.2	2.99341e+08	3.18474e+08	3.562e+08
High	Master Protein	P02786	Transferrin receptor protein 1 [OS=Homo sapiens]	>ProteinCenter:SwissProt|P02786 Transferrin receptor protein 1 [OS=Homo sapiens]	0	FALSE	54.454	28	18	18	49	18	760	84.8	6.61	37.99	18	cell differentiation;cell organization and biogenesis;cellular homeostasis;metabolic process;regulation of biological process;response to stimulus;transport	cell surface;endosome;extracellular;membrane	protein binding;receptor activity;RNA binding;transporter activity	Pf02225, Pf04253, Pf04389	7037	ENSG00000072274.12	TFRC	3	Endocytosis; Hematopoietic cell lineage; Phagosome; HIF-1 signaling pathway	Cargo recognition for clathrin-mediated endocytosis; Transferrin endocytosis and recycling; Golgi Associated Vesicle Biogenesis	Iron metabolism in placenta	15	0.663	0.763	1.644	2.5	1.378	1.111	1.533	0.926	91.2	83.8	100.7	91.5	132.3	81.7	129	114.2	75.6	1.88696e+08	1.73559e+08	2.08563e+08
High	Master Protein	P56470	galectin-4 [OS=Homo sapiens]	>ProteinCenter:SwissProt|P56470 galectin-4 [OS=Homo sapiens]	0	FALSE	54.437	38	11	14	29	11	323	35.9	9.16	28.94	11		cytosol;membrane		Pf00337	3960	ENSG00000282992.1; ENSG00000171747.8	LGALS4	19; CHR_HG26_PATCH				0	1.222	1.158	13.441	6.318	15.958	1.732	3.33	2.612	0.9	0.9	0.9	373.4	327.8	189.3	1.7	3	2	1.297e+06	1.32579e+06	1.25682e+06
High	Master Protein	P16401	Histone H1.5 [OS=Homo sapiens]	>ProteinCenter:SwissProt|P16401 Histone H1.5 [OS=Homo sapiens]	0	FALSE	54.253	36	12	14	53	10	226	22.6	10.92	52.15	12	cell organization and biogenesis;regulation of biological process	chromosome;nucleus	DNA binding;protein binding;RNA binding	Pf00538	3009	ENSG00000184357.4	HIST1H1B	6		Formation of Senescence-Associated Heterochromatin Foci (SAHF); Activation of DNA fragmentation factor		10	2.329	4.027	100	83.292	53.004	100	100	100	0.1	0.4	0.8	138.6	137.6	158.1	217.4	157.9	89.1	942170	2.40881e+06	5.28202e+06
High	Master Protein	O14672	Disintegrin and metalloproteinase domain-containing protein 10 [OS=Homo sapiens]	>ProteinCenter:SwissProt|O14672 Disintegrin and metalloproteinase domain-containing protein 10 [OS=Homo sapiens]	0	FALSE	54.249	16	12	15	93	12	748	84.1	7.77	82.49	12	cell communication;cell organization and biogenesis;metabolic process;regulation of biological process;response to stimulus;transport	cell surface;cytoplasm;Golgi;membrane;nucleus;organelle lumen	catalytic activity;metal ion binding;protein binding	Pf00200, Pf01421, Pf01562, Pf12785, Pf13574, Pf13582, Pf13583, Pf13688	102	ENSG00000137845.14	ADAM10	15	Epithelial cell signaling in Helicobacter pylori infection; Alzheimer's disease	Collagen degradation; Post-translational protein phosphorylation; Activated NOTCH1 Transmits Signal to the Nucleus; Regulation of Insulin-like Growth Factor (IGF) transport and uptake by Insulin-like Growth Factor Binding Proteins (IGFBPs); Constitutive Signaling by NOTCH1 t(7;9)(NOTCH1:M1580_K2555) Translocation Mutant; Signaling by NOTCH4; Constitutive Signaling by NOTCH1 HD+PEST Domain Mutants…	Alzheimers Disease; Copper homeostasis; Canonical and Non-canonical Notch signaling; Hypertrophy Model	41	0.689	0.743	0.472	0.735	0.825	0.779	0.829	0.43	148.4	100.9	109.5	84.3	87.3	108.5	100.7	104.1	56.3	5.63057e+08	3.82812e+08	4.15511e+08
High	Master Protein	Q9H223	EH domain-containing protein 4 [OS=Homo sapiens]	>ProteinCenter:SwissProt|Q9H223 EH domain-containing protein 4 [OS=Homo sapiens]	0	FALSE	54.14	29	17	17	71	10	541	61.1	6.76	68.29	17	cell organization and biogenesis;regulation of biological process;response to stimulus;transport	endoplasmic reticulum;endosome;membrane;nucleus	metal ion binding;nucleotide binding;protein binding	Pf00350, Pf01926, Pf12763	30844	ENSG00000103966.10	EHD4	15	Endocytosis			1	0.869	0.883	2.683	3.801	2.98	1.185	1.49	1.68	60.6	52.9	56.3	144.7	205.4	150.4	71.4	61	97.3	8.54593e+07	7.45453e+07	7.93451e+07
High	Master Protein	P20020	Plasma membrane calcium-transporting ATPase 1 [OS=Homo sapiens]	>ProteinCenter:SwissProt|P20020 Plasma membrane calcium-transporting ATPase 1 [OS=Homo sapiens]	0	FALSE	54.11	16	15	17	43	8	1258	138.7	6.04	39.5	15	cell communication;cellular homeostasis;response to stimulus;transport	membrane;nucleus	catalytic activity;metal ion binding;nucleotide binding;protein binding;transporter activity	Pf00122, Pf00689, Pf00690, Pf00702, Pf08282, Pf12424, Pf12710, Pf13246	490		ATP2B1	12	Salivary secretion; cGMP-PKG signaling pathway; cAMP signaling pathway; Endocrine and other factor-regulated calcium reabsorption; Mineral absorption; Adrenergic signaling in cardiomyocytes; Calcium signaling pathway; Pancreatic secretion	Ion homeostasis; Reduction of cytosolic Ca++ levels; Ion transport by P-type ATPases	Calcium Regulation in the Cardiac Cell	19	0.716	0.6	2.229	2.712	1.861	0.419	0.378	0.441	87.6	70.7	64.4	172.3	243	150	27.4	42.1	42.5	3.86793e+07	3.11964e+07	2.84241e+07
High	Master Protein	P17066	Heat shock 70 kDa protein 6 [OS=Homo sapiens]	>ProteinCenter:SwissProt|P17066 Heat shock 70 kDa protein 6 [OS=Homo sapiens]	0	FALSE	54.067	19	12	14	60	1	643	71	6.14	67.47	12	cell organization and biogenesis;metabolic process;response to stimulus;transport	cytoplasm;cytosol;extracellular;organelle lumen	catalytic activity;nucleotide binding;protein binding	Pf00012, Pf06723	3310	ENSG00000173110.7	HSPA6	1	Endocytosis; Estrogen signaling pathway; Protein processing in endoplasmic reticulum; Spliceosome; Measles; Longevity regulating pathway - multiple species; Legionellosis; Influenza A; Toxoplasmosis; MAPK signaling pathway; Epstein-Barr virus infection; Antigen processing and presentation	Neutrophil degranulation; Regulation of HSF1-mediated heat shock response	Parkin-Ubiquitin Proteasomal System pathway	20								100									900
High	Master Protein	P62987	Ubiquitin-60S ribosomal protein L40 [OS=Homo sapiens]	>ProteinCenter:SwissProt|P62987 Ubiquitin-60S ribosomal protein L40 [OS=Homo sapiens]	0	TRUE	53.823	56	11	11	264	11	128	14.7	9.83	210.13	11	cell communication;cell organization and biogenesis;cellular homeostasis;defense response;metabolic process;regulation of biological process;response to stimulus;transport	cytoplasm;cytosol;endoplasmic reticulum;membrane;nucleus;ribosome	protein binding;structural molecule activity	Pf00240, Pf01020, Pf11976, Pf13019, Pf13881, Pf14560	7311	ENSG00000221983.7	UBA52	19	Ribosome	NOTCH1 Intracellular Domain Regulates Transcription; Activated NOTCH1 Transmits Signal to the Nucleus; Regulation of RAS by GAPs; Viral mRNA Translation; UCH proteinases; ISG15 antiviral mechanism; Regulation of PLK1 Activity at G2/M Transition; Constitutive Signaling by NOTCH1 HD+PEST Domain Mutants; Activated TLR4 signalling; Hh mutants that don't undergo autocatalytic processing are degraded b…	DNA Replication; Cytoplasmic Ribosomal Proteins	361	0.831	1.771	0.708	1.002	1.225	3.484	1.638	1.609	75.6	62.8	87.3	67.7	68.6	67.4	197.9	176.1	96.7	2.54168e+09	2.11057e+09	2.93573e+09
High	Master Protein	Q5QNW6-1	Histone H2B type 2-F [OS=Homo sapiens]	>ProteinCenter:SwissProt|Q5QNW6-1 Histone H2B type 2-F [OS=Homo sapiens]	0	FALSE	53.245	53	6	11	90	1	126	13.9	10.32	99.96	6	cell organization and biogenesis	chromosome;cytosol;nucleus	DNA binding;protein binding	Pf00125, Pf00808	440689	ENSG00000203814.6	HIST2H2BF	1	Systemic lupus erythematosus; Alcoholism; Viral carcinogenesis	HDACs deacetylate histones; HATs acetylate histones; Ub-specific processing proteases		11	2.998	5.174	0.046	0.01	0.01	6.927	0.01	3.463	45.9	137.6	237.5	2.1			317.9		158.9	3.97009e+07	1.19036e+08	2.05405e+08
High	Master Protein	P07737	profilin-1 [OS=Homo sapiens]	>ProteinCenter:SwissProt|P07737 profilin-1 [OS=Homo sapiens]	0	FALSE	53.224	74	11	14	73	7	140	15	8.27	76.43	11	cell organization and biogenesis;regulation of biological process;response to stimulus	cytoplasm;cytoskeleton;cytosol;membrane;nucleus	enzyme regulator activity;nucleotide binding;protein binding;RNA binding	Pf00235	5216	ENSG00000108518.7	PFN1	17	Regulation of actin cytoskeleton; Rap1 signaling pathway; Shigellosis; Salmonella infection	Platelet degranulation ; Signaling by ROBO receptors; RHO GTPases Activate Formins; PCP/CE pathway	Association Between Physico-Chemical Features and Toxicity Associated Pathways; VEGFA-VEGFR2 Signaling Pathway; Regulation of Actin Cytoskeleton; G13 Signaling Pathway	22	0.594	0.533	2.21	2.543	1.493	1.088	2.011	2.481	61.9	34.6	30.4	160.4	156.9	96.5	65.9	158.1	135.2	3.79301e+08	2.11761e+08	1.86164e+08
High	Master Protein	Q14315	Filamin-C [OS=Homo sapiens]	>ProteinCenter:SwissProt|Q14315 Filamin-C [OS=Homo sapiens]	0	FALSE	53.217	7	17	17	43	8	2725	290.8	5.97	49.03	17	cell organization and biogenesis	cytoplasm;cytoskeleton;cytosol;membrane	protein binding	Pf00307, Pf00630	2318	ENSG00000128591.15	FLNC	7	Focal adhesion; Proteoglycans in cancer; MAPK signaling pathway; Salmonella infection	Cell-extracellular matrix interactions		7	0.655	0.729	0.118	0.01	0.133	0.194	0.01	0.22	346.7	198.4	279.6	14.9		18.6	19.8		22.2	1.88126e+07	1.07646e+07	1.51735e+07
High	Master Protein	Q92598	Heat shock protein 105 kDa [OS=Homo sapiens]	>ProteinCenter:SwissProt|Q92598 Heat shock protein 105 kDa [OS=Homo sapiens]	0	FALSE	53.042	21	13	13	29	12	858	96.8	5.39	28.41	13	metabolic process;regulation of biological process;response to stimulus;transport	cytoplasm;cytosol;extracellular;nucleus;organelle lumen	enzyme regulator activity;nucleotide binding;protein binding	Pf00012	10808	ENSG00000120694.19	HSPH1	13	Protein processing in endoplasmic reticulum	Scavenging by Class F Receptors; Regulation of HSF1-mediated heat shock response		8	0.752	0.825	7.916	6.448	4.863	1.488	2.443	3.751	34.6	27.5	28.5	203.6	217.3	95.3	57.9	101.4	133.8	1.63211e+07	1.29883e+07	1.34568e+07
High	Master Protein	P36578	60S ribosomal protein L4 [OS=Homo sapiens]	>ProteinCenter:SwissProt|P36578 60S ribosomal protein L4 [OS=Homo sapiens]	0	FALSE	53.017	42	16	18	67	16	427	47.7	11.06	64.08	16	cell organization and biogenesis;metabolic process;transport	cytoplasm;cytosol;endoplasmic reticulum;membrane;nucleus;ribosome	protein binding;RNA binding;structural molecule activity	Pf00573, Pf14374	6124	ENSG00000174444.14	RPL4	15	Ribosome	Peptide chain elongation; Eukaryotic Translation Termination; Viral mRNA Translation; L13a-mediated translational silencing of Ceruloplasmin expression; Nonsense Mediated Decay (NMD) independent of the Exon Junction Complex (EJC); Selenocysteine synthesis; Nonsense Mediated Decay (NMD) enhanced by the Exon Junction Complex (EJC); GTP hydrolysis and joining of the 60S ribosomal subunit; Major path…	Cytoplasmic Ribosomal Proteins	34	0.871	1.055	1.08	1.217	0.603	1.153	0.887	1.154	99.5	84.5	114.7	100.2	100.9	58.7	120.7	92.6	128.2	4.99872e+08	4.24607e+08	5.76448e+08
High	Master Protein	P00338-1	L-lactate dehydrogenase A chain [OS=Homo sapiens]	>ProteinCenter:SwissProt|P00338-1 L-lactate dehydrogenase A chain [OS=Homo sapiens]	0	FALSE	52.672	40	13	15	43	12	332	36.7	8.27	55.62	13	metabolic process;regulation of biological process;response to stimulus	cytoplasm;cytosol;membrane;nucleus	catalytic activity;nucleotide binding;protein binding	Pf00056, Pf02866	3939	ENSG00000134333.13	LDHA	11	Pyruvate metabolism; Propanoate metabolism; Cysteine and methionine metabolism; Glucagon signaling pathway; HIF-1 signaling pathway; Metabolic pathways; Glycolysis / Gluconeogenesis; Central carbon metabolism in cancer	Pyruvate metabolism	Cori Cycle; Photodynamic therapy-induced HIF-1 survival signaling; Amino Acid metabolism; Glycolysis and Gluconeogenesis	16	0.724	0.65	2.194	4.226	1.521	1.038	3.336	2.199	79.2	67.9	63.7	96.7	131	92.9	90.8	134.6	143.3	4.30002e+08	3.68843e+08	3.45938e+08
High	Master Protein	Q53EZ4-1	Centrosomal protein of 55 kDa [OS=Homo sapiens]	>ProteinCenter:SwissProt|Q53EZ4-1 Centrosomal protein of 55 kDa [OS=Homo sapiens]	0	FALSE	52.617	33	16	16	47	16	464	54.1	7.01	58.77	16	cell division;cell organization and biogenesis	cytoplasm;cytoskeleton;membrane	protein binding	Pf12180	55165	ENSG00000138180.15	CEP55	10				0	0.93	1.575	0.624	0.971	0.648	2.606	3.296	2.318	65	64	96.5	31	58.3	30.5	176.4	202.7	175.6	7.32922e+07	7.21979e+07	1.0879e+08
High	Master Protein	Q3SZH5	TREMBL:Q3SZH5 (Bos taurus) Similar to Angiotensinogen	>Q3SZH5 TREMBL:Q3SZH5 (Bos taurus) Similar to Angiotensinogen	0	TRUE	52.386	35	11	12	47	11	424	45.4	9.19	26.26	11	regulation of biological process;response to stimulus;transport	extracellular	protein binding	Pf00079	527114	ENSBTAG00000012393.5	AGT	28	Renin-angiotensin system; Renin secretion	Gastrin-CREB signalling pathway via PKC and MAPK; G alpha (i) signalling events; Metabolism of Angiotensinogen to Angiotensins; Peptide ligand-binding receptors	ACE Inhibitor Pathway; Monoamine Transport; Physiological and Pathological Hypertrophy of the Heart; IL-6 Signaling Pathway; Adipogenesis	19	0.723	0.703	0.67	0.427	0.849	0.578	0.292	0.556	155.4	118	117.6	101.2	68.5	124.9	89	41	84.3	2.78541e+08	2.11463e+08	2.10789e+08
High	Master Protein	P27216-2	Isoform B of Annexin A13 [OS=Homo sapiens]	>ProteinCenter:SwissProt|P27216-2 Isoform B of Annexin A13 [OS=Homo sapiens]	0	FALSE	52.286	43	14	15	31	13	357	39.7	5.5	38.29	14	cell differentiation	membrane	metal ion binding	Pf00191	312	ENSG00000104537.16	ANXA13	8				0	1.143	1.308	92.718	94.059	60.986	0.892	0.576	0.973	4	4.6	5.5	310.3	364.8	204.8	1.9	2.2	1.9	3.19233e+06	3.67358e+06	4.32945e+06
High	Master Protein	P31946	14-3-3 protein beta/alpha [OS=Homo sapiens]	>ProteinCenter:SwissProt|P31946 14-3-3 protein beta/alpha [OS=Homo sapiens]	0	FALSE	51.777	44	11	14	75	5	246	28.1	4.83	100.77	11	cell organization and biogenesis;metabolic process;regulation of biological process;response to stimulus;transport	cytoplasm;cytosol;membrane;mitochondrion;nucleus	protein binding	Pf00244	7529	ENSG00000166913.12	YWHAB	20	Epstein-Barr virus infection; Oocyte meiosis; Hepatitis B; PI3K-Akt signaling pathway; Hippo signaling pathway; Viral carcinogenesis; Cell cycle	MAP2K and MAPK activation; mTORC1-mediated signalling; Negative regulation of MAPK pathway; ARMS-mediated activation; Tristetraprolin (TTP, ZFP36) binds and destabilizes mRNA; Translocation of GLUT4 to the plasma membrane; Rap1 signalling; Paradoxical activation of RAF signaling by kinase inactive BRAF; Frs2-mediated activation; Butyrate Response Factor 1 (BRF1) binds and destabilizes mRNA; Inter…	Cell Cycle; IL-3 Signaling Pathway; Myometrial Relaxation and Contraction Pathways; Calcium Regulation in the Cardiac Cell; Sudden Infant Death Syndrome (SIDS) Susceptibility Pathways	68	0.764	0.664	7.295	18.415	9.158	1.329	9.62	2.797	24.2	21.4	26.6	100.5	282.5	143.3	51.8	144	105.7	2.77092e+07	2.452e+07	3.04834e+07
High	Master Protein	Q9Y446	Plakophilin-3 [OS=Homo sapiens]	>ProteinCenter:SwissProt|Q9Y446 Plakophilin-3 [OS=Homo sapiens]	0	FALSE	51.597	20	14	14	36	14	797	87	9.32	31.33	14	cell death;cell organization and biogenesis;regulation of biological process	cytoskeleton;membrane;nucleus	protein binding;RNA binding;translation regulator activity	Pf00514	11187	ENSG00000184363.9	PKP3	11		Formation of the cornified envelope		3	0.612	0.902	2.795	3.448	2.471	4.458	3.479	3.191	35.7	24.5	39.6	97.7	140.6	106.1	165.8	155.7	134.4	3.23005e+07	2.21491e+07	3.58229e+07
High	Master Protein	P47756-2	Isoform 2 of F-actin-capping protein subunit beta [OS=Homo sapiens]	>ProteinCenter:SwissProt|P47756-2 Isoform 2 of F-actin-capping protein subunit beta [OS=Homo sapiens]	0	FALSE	51.409	56	13	16	57	13	272	30.6	6	65.19	13	cell organization and biogenesis;cellular component movement;coagulation;regulation of biological process;transport	cytoplasm;cytoskeleton;cytosol	protein binding	Pf01115	832	ENSG00000077549.17	CAPZB	1				0	0.851	0.904	2.685	3.586	2.191	1.295	1.488	2.315	51.6	51.9	62.9	121.7	180.8	106.4	83	113.3	128.5	8.46287e+07	8.49902e+07	1.03123e+08
High	Master Protein	P61224-1	Ras-related protein Rap-1b [OS=Homo sapiens]	>ProteinCenter:SwissProt|P61224-1 Ras-related protein Rap-1b [OS=Homo sapiens]	0	FALSE	51.169	58	11	11	61	2	184	20.8	5.78	54.5	11	cell organization and biogenesis;cell proliferation;regulation of biological process;response to stimulus;transport	cytoplasm;cytosol;membrane	catalytic activity;nucleotide binding;protein binding	Pf00009, Pf00071, Pf08477	5908	ENSG00000127314.17	RAP1B	12	cAMP signaling pathway; Leukocyte transendothelial migration; Renal cell carcinoma; Rap1 signaling pathway; Platelet activation; Ras signaling pathway; Pancreatic secretion; MAPK signaling pathway; Chemokine signaling pathway; Focal adhesion; Long-term potentiation; Neurotrophin signaling pathway	Gene and protein expression by JAK-STAT signaling after Interleukin-12 stimulation; Signaling by BRAF and RAF fusions; MAP2K and MAPK activation; GRB2:SOS provides linkage to MAPK signaling for Integrins ; MET activates RAP1 and RAC1; Signaling by RAS mutants; Signaling by high-kinase activity BRAF mutants; Signaling by moderate kinase activity BRAF mutants; p130Cas linkage to MAPK signaling for …	Integrin-mediated Cell Adhesion; Human Thyroid Stimulating Hormone (TSH) signaling pathway; Corticotropin-releasing hormone signaling pathway; Common Pathways Underlying Drug Addiction; Focal Adhesion; Signaling of Hepatocyte Growth Factor Receptor; MAPK Signaling Pathway; VEGFA-VEGFR2 Signaling Pathway; Chemokine signaling pathway	55	1.106	0.746	1.164	1.976	2.194	1.591	1.677	1.314	65.5	75	55.1	76.2	162.1	164.5	104.3	109.2	88.1	3.78464e+07	4.33025e+07	3.18058e+07
High	Master Protein	P02676	SWISS-PROT:P02676 (Bos taurus) similar to Fibrinogen beta chain precursor	>P02676 SWISS-PROT:P02676 (Bos taurus) similar to Fibrinogen beta chain precursor	0	TRUE	50.959	28	15	15	57	15	495	56.4	8.22	43.23	15												0	1.264	1.299	0.452	0.251	0.629	0.809	0.613	0.543	129.2	165	170.4	53.1	37.3	81.1	114.6	66.5	82.8	1.21568e+09	1.55199e+09	1.60257e+09
High	Master Protein	P26639-1	Threonine--tRNA ligase, cytoplasmic [OS=Homo sapiens]	>ProteinCenter:SwissProt|P26639-1 Threonine--tRNA ligase, cytoplasmic [OS=Homo sapiens]	0	FALSE	50.906	25	16	17	45	16	723	83.4	6.67	44	16	metabolic process	cytoplasm;cytoskeleton;cytosol	catalytic activity;nucleotide binding;protein binding;RNA binding	Pf00587, Pf02824, Pf03129, Pf07973	6897	ENSG00000113407.13	TARS	5	Aminoacyl-tRNA biosynthesis	Cytosolic tRNA aminoacylation		5	0.604	0.526	3.47	3.47	2.528	1.037	2.658	1.558	71.1	52.4	63.8	141.4	139	88.8	86.4	137.1	120	7.54951e+07	5.56712e+07	6.77575e+07
High	Master Protein	Q9UQB8-5	Isoform 5 of Brain-specific angiogenesis inhibitor 1-associated protein 2 [OS=Homo sapiens]	>ProteinCenter:SwissProt|Q9UQB8-5 Isoform 5 of Brain-specific angiogenesis inhibitor 1-associated protein 2 [OS=Homo sapiens]	0	FALSE	50.88	42	16	16	46	16	520	57.4	8.79	37.43	16	cell organization and biogenesis;regulation of biological process;response to stimulus	cytoplasm;cytoskeleton;cytosol;endoplasmic reticulum;Golgi;membrane	protein binding	Pf00018, Pf07653, Pf08397, Pf14604	10458	ENSG00000175866.15	BAIAP2	17			Regulation of Actin Cytoskeleton	1	0.781	0.74	2.145	2.793	1.959	0.499	0.742	0.741	70.6	56.1	56.9	153.8	246.9	161.9	34.7	63.5	55.7	5.94318e+07	4.72216e+07	4.79021e+07
High	Master Protein	P33176	Kinesin-1 heavy chain [OS=Homo sapiens]	>ProteinCenter:SwissProt|P33176 Kinesin-1 heavy chain [OS=Homo sapiens]	0	FALSE	50.855	16	14	14	42	14	963	109.6	6.51	56.58	14	cell differentiation;cell organization and biogenesis;cellular component movement;metabolic process;regulation of biological process;transport	cytoplasm;cytoskeleton;cytosol;membrane	catalytic activity;motor activity;nucleotide binding;protein binding	Pf00225, Pf01576, Pf02463, Pf03999, Pf04111, Pf04156, Pf05483, Pf05557, Pf05622, Pf06160, Pf07111, Pf07888, Pf10174, Pf12128, Pf13514, Pf13851, Pf14915	3799	ENSG00000170759.10	KIF5B	10	Dopaminergic synapse; Endocytosis	COPI-dependent Golgi-to-ER retrograde traffic; Kinesins; RHO GTPases activate KTN1; Insulin processing; MHC class II antigen presentation	Insulin Signaling	21	0.859	0.903	1.483	1.233	0.899	0.972	1.033	1.295	86.3	80.8	93.9	126.9	110.4	82.7	96.4	105.6	117.1	4.90646e+07	4.59456e+07	5.33797e+07
High	Master Protein	P55196-5	Isoform 5 of Afadin [OS=Homo sapiens]	>ProteinCenter:SwissProt|P55196-5 Isoform 5 of Afadin [OS=Homo sapiens]	0	FALSE	50.85	11	17	17	38	17	1834	207.7	6.39	36.93	17	cell communication;cell organization and biogenesis;regulation of biological process;response to stimulus	cytosol;membrane	protein binding	Pf00498, Pf00595, Pf00788, Pf01843	4301	ENSG00000130396.20	MLLT4; AFDN	6			VEGFA-VEGFR2 Signaling Pathway	1	0.891	1.029	3.081	4.824	3.51	1.819	2.163	2.437	36.8	27.1	35.1	132.8	236.9	161.3	63.2	104	102.8	1.58872e+07	1.16769e+07	1.51553e+07
High	Master Protein	Q7KZF4	staphylococcal nuclease domain-containing protein 1 [OS=Homo sapiens]	>ProteinCenter:SwissProt|Q7KZF4 staphylococcal nuclease domain-containing protein 1 [OS=Homo sapiens]	0	FALSE	50.326	20	15	15	39	15	910	101.9	7.17	33.75	15	cell differentiation;metabolic process;regulation of biological process	cytoplasm;cytosol;membrane;mitochondrion;nucleus	catalytic activity;protein binding;RNA binding	Pf00565, Pf00567	27044	ENSG00000197157.10	SND1	7	Viral carcinogenesis; Epstein-Barr virus infection	Signaling by BRAF and RAF fusions		6	0.76	0.726	5.808	3.72	2.177	1.43	1.701	2.001	36.8	29.6	33	225.8	162.3	91.3	69.1	131.8	120.4	2.43125e+07	1.95457e+07	2.17704e+07
High	Master Protein	P58107	epiplakin [OS=Homo sapiens]	>ProteinCenter:SwissProt|P58107 epiplakin [OS=Homo sapiens]	0	FALSE	50.259	14	15	15	25	13	5090	555.3	5.6	23.34	15	cell organization and biogenesis;regulation of biological process;response to stimulus	cytoplasm;cytoskeleton;membrane	protein binding;RNA binding	Pf00681	83481		EPPK1	8				0	0.987	1.207	9.865	8.95	4.893	0.69	0.522	0.839	32.2	17.4	36.5	374.1	249.4	134.5	16.8	16.8	22.3	3.78076e+06	2.03805e+06	4.28589e+06
High	Master Protein	P46939	Utrophin [OS=Homo sapiens]	>ProteinCenter:SwissProt|P46939 Utrophin [OS=Homo sapiens]	0	FALSE	50.077	7	18	18	31	18	3433	394.2	5.33	31.63	18	cell organization and biogenesis;regulation of biological process;response to stimulus	cytoplasm;cytoskeleton;membrane	metal ion binding;protein binding	Pf00307, Pf00397, Pf00435, Pf00569, Pf09068, Pf09069, Pf11971	7402	ENSG00000152818.18	UTRN	6			Primary Focal Segmental Glomerulosclerosis FSGS	1	0.973	0.971	3.178	3.722	2.658	1.03	0.889	0.98	35	37.2	33.7	188.9	247.6	180.7	44.6	76.4	55.7	1.10258e+07	1.17225e+07	1.06176e+07
High	Master Protein	P11940-1	Polyadenylate-binding protein 1 [OS=Homo sapiens]	>ProteinCenter:SwissProt|P11940-1 Polyadenylate-binding protein 1 [OS=Homo sapiens]	0	FALSE	50.074	19	12	13	45	6	636	70.6	9.5	42.98	12	metabolic process;regulation of biological process	cytoplasm;cytosol;membrane;nucleus;spliceosomal complex	protein binding;RNA binding;translation regulator activity	Pf00076, Pf00658, Pf13893, Pf14259	26986	ENSG00000070756.15	PABPC1	8	RNA degradation; mRNA surveillance pathway; RNA transport	AUF1 (hnRNP D0) binds and destabilizes mRNA; L13a-mediated translational silencing of Ceruloplasmin expression; Regulation of expression of SLITs and ROBOs; Nonsense Mediated Decay (NMD) independent of the Exon Junction Complex (EJC); Translation initiation complex formation; Nonsense Mediated Decay (NMD) enhanced by the Exon Junction Complex (EJC); Deadenylation of mRNA	Translation Factors; Endoderm Differentiation	24	0.874	0.95	2.021	1.398	0.699	1.218	1.824	2.744	69.9	59.2	63.1	162.8	107.4	54.1	86	125.5	171.9	4.82992e+07	4.0903e+07	4.35529e+07
High	Master Protein	P49588	Alanine--tRNA ligase, cytoplasmic [OS=Homo sapiens]	>ProteinCenter:SwissProt|P49588 Alanine--tRNA ligase, cytoplasmic [OS=Homo sapiens]	0	FALSE	49.909	16	15	15	33	15	968	106.7	5.53	42.77	15	metabolic process;regulation of biological process	cytoplasm;cytosol;membrane;mitochondrion	catalytic activity;metal ion binding;nucleotide binding;RNA binding	Pf01411, Pf02272, Pf07973	16	ENSG00000090861.15	AARS	16	Aminoacyl-tRNA biosynthesis	Cytosolic tRNA aminoacylation		5	0.732	0.845	1.864	2.095	1.309	2.043	3.075	3.129	56.9	42	57.1	99.3	112.1	67.3	101.4	183.6	180.3	5.95314e+07	4.39208e+07	5.97289e+07
High	Master Protein	Q9P206-2	Isoform 2 of Uncharacterized protein KIAA1522 [OS=Homo sapiens]	>ProteinCenter:SwissProt|Q9P206-2 Isoform 2 of Uncharacterized protein KIAA1522 [OS=Homo sapiens]	0	FALSE	49.808	19	15	15	29	15	1094	113	10.02	31.63	15	cell differentiation				57648	ENSG00000162522.10	KIAA1522	1				0	0.906	0.771	6.353	9.046	6.175	0.883	0.88	1.503	28.7	17.9	30.8	215.6	320.8	193.8	22.4	23.1	47	9.76229e+06	6.09021e+06	1.04736e+07
High	Master Protein	O14792	Heparan sulfate glucosamine 3-O-sulfotransferase 1 [OS=Homo sapiens]	>ProteinCenter:SwissProt|O14792 Heparan sulfate glucosamine 3-O-sulfotransferase 1 [OS=Homo sapiens]	0	FALSE	49.577	47	14	15	38	14	307	35.8	8.84	37.66	14	metabolic process	Golgi;organelle lumen	catalytic activity	Pf00685	9957	ENSG00000002587.9	HS3ST1	4	Glycosaminoglycan biosynthesis - heparan sulfate / heparin	HS-GAG biosynthesis	Metapathway biotransformation	7	1.131	1.142	0.122	0.07	0.182	0.01	0.059	0.041	242.8	263	309	28.3	15.2	38.3	0.1	2.2	1.2	4.70271e+08	5.09519e+08	5.98529e+08
High	Master Protein	P07195	L-lactate dehydrogenase B chain [OS=Homo sapiens]	>ProteinCenter:SwissProt|P07195 L-lactate dehydrogenase B chain [OS=Homo sapiens]	0	FALSE	49.473	40	13	13	49	12	334	36.6	6.05	62.92	13	metabolic process	cytoplasm;cytosol;membrane;mitochondrion	catalytic activity;nucleotide binding;protein binding	Pf00056, Pf02866	3945	ENSG00000111716.12	LDHB	12	Cysteine and methionine metabolism; Glucagon signaling pathway; Glycolysis / Gluconeogenesis; Propanoate metabolism; Metabolic pathways; Pyruvate metabolism	Pyruvate metabolism	Glycolysis and Gluconeogenesis	11	1.07	0.988	1.376	1.621	1.364	1.006	2.599	2.212	74.6	75.7	78.5	100.7	125.2	92.9	80.3	127.8	144.2	5.9036e+08	5.9947e+08	6.21605e+08
High	Master Protein	Q00796	Sorbitol dehydrogenase [OS=Homo sapiens]	>ProteinCenter:SwissProt|Q00796 Sorbitol dehydrogenase [OS=Homo sapiens]	0	FALSE	49.463	34	10	11	40	10	357	38.3	7.97	46.69	10	cellular component movement;metabolic process;response to stimulus	cytosol;membrane;mitochondrion	catalytic activity;metal ion binding;nucleotide binding;protein binding	Pf00107, Pf08240, Pf12847	6652	ENSG00000140263.13	SORD	15	Metabolic pathways; Fructose and mannose metabolism; Pentose and glucuronate interconversions	Catabolism of glucuronate to xylulose-5-phosphate; Fructose biosynthesis	Polyol Pathway	9	0.62	0.731	3.14	3.129	1.653	0.927	1.434	1.489	70.1	49.8	58.8	174.5	181.6	119.9	62.4	99.7	83.1	7.12525e+07	5.06372e+07	5.97958e+07
High	Master Protein	P48643	T-complex protein 1 subunit epsilon [OS=Homo sapiens]	>ProteinCenter:SwissProt|P48643 T-complex protein 1 subunit epsilon [OS=Homo sapiens]	0	FALSE	49.089	26	15	15	70	15	541	59.6	5.66	71.48	15	metabolic process;regulation of biological process;response to stimulus;transport	cytoplasm;cytoskeleton;cytosol	nucleotide binding;protein binding;RNA binding	Pf00118	22948	ENSG00000150753.11	CCT5	5		BBSome-mediated cargo-targeting to cilium; Prefoldin mediated transfer of substrate to CCT/TriC; Cooperation of PDCL (PhLP1) and TRiC/CCT in G-protein beta folding; Association of TriC/CCT with target proteins during biosynthesis; Formation of tubulin folding intermediates by CCT/TriC; Folding of actin by CCT/TriC		13	1.021	0.996	0.921	0.946	0.782	1.067	1.436	1.655	95.9	95.5	94.2	87.8	91.1	75.1	91.6	128.3	140.4	2.16044e+08	2.15261e+08	2.12226e+08
High	Master Protein	O00571	ATP-dependent RNA helicase DDX3X [OS=Homo sapiens]	>ProteinCenter:SwissProt|O00571 ATP-dependent RNA helicase DDX3X [OS=Homo sapiens]	0	FALSE	49.062	20	13	13	40	12	662	73.2	7.18	49.74	13	cell death;cell organization and biogenesis;defense response;metabolic process;regulation of biological process;response to stimulus;transport	cytoplasm;cytosol;extracellular;membrane;mitochondrion;nucleus;organelle lumen	catalytic activity;DNA binding;enzyme regulator activity;nucleotide binding;protein binding;RNA binding	Pf00270, Pf00271, Pf04851	1654	ENSG00000215301.9	DDX3X	X	RIG-I-like receptor signaling pathway; Viral carcinogenesis; Hepatitis B	Neutrophil degranulation	RIG-I-like Receptor Signaling	7	0.85	1.078	3.353	2.615	1.397	1.784	2.75	3.397	52.5	36.1	41.3	152.4	120.7	73.7	95.1	148	180.4	3.38889e+07	2.32986e+07	2.66385e+07
High	Master Protein	P07237	Protein disulfide-isomerase [OS=Homo sapiens]	>ProteinCenter:SwissProt|P07237 Protein disulfide-isomerase [OS=Homo sapiens]	0	FALSE	48.808	32	16	17	31	16	508	57.1	4.87	27.95	16	cell organization and biogenesis;cellular homeostasis;metabolic process;regulation of biological process;response to stimulus	endoplasmic reticulum;extracellular;membrane;organelle lumen	catalytic activity;metal ion binding;protein binding;RNA binding	Pf00085, Pf01216, Pf13098, Pf13848, Pf13899, Pf13905	5034	ENSG00000185624.14	P4HB	17	Protein processing in endoplasmic reticulum	Post-translational protein phosphorylation; Regulation of Insulin-like Growth Factor (IGF) transport and uptake by Insulin-like Growth Factor Binding Proteins (IGFBPs); VLDL assembly; Chylomicron assembly; Collagen biosynthesis and modifying enzymes; Interleukin-12 family signaling; Detoxification of Reactive Oxygen Species; Hedgehog ligand biogenesis		23	0.699	0.672	8.084	10.929	1.399	1.043	5.293	2.425	26.2	16.9	21.8	215.4	337.9	36	33.1	143.5	69.3	2.72346e+07	1.76267e+07	2.266e+07
High	Master Protein	P06753-2	Isoform 2 of Tropomyosin alpha-3 chain [OS=Homo sapiens]	>ProteinCenter:SwissProt|P06753-2 Isoform 2 of Tropomyosin alpha-3 chain [OS=Homo sapiens]	0	FALSE	48.799	40	11	11	42	7	248	29	4.78	56.36	11	cell organization and biogenesis;cellular component movement	cytoskeleton;cytosol	protein binding;structural molecule activity	Pf00261, Pf12718	7170	ENSG00000143549.19	TPM3	1			Striated Muscle Contraction	1	0.573	0.509	7.522	26.859	12.83	2.267	13.411	4.242	24.5	14.3	16.5	166.8	266.5	133	52.5	124.7	101.1	4.96582e+07	2.90331e+07	3.34011e+07
High	Master Protein	P52292	Importin subunit alpha-1 [OS=Homo sapiens]	>ProteinCenter:SwissProt|P52292 Importin subunit alpha-1 [OS=Homo sapiens]	0	FALSE	48.728	32	13	13	39	13	529	57.8	5.4	33.89	13	metabolic process;regulation of biological process;transport	cytoplasm;cytosol;membrane;nucleus	protein binding;RNA binding;transporter activity	Pf00514, Pf01749, Pf13513, Pf13646	3838	ENSG00000182481.8	KPNA2	17	Influenza A	ISG15 antiviral mechanism; NS1 Mediated Effects on Host Pathways; Sensing of DNA Double Strand Breaks		15	0.734	0.784	2.777	2.016	0.863	1.483	2.056	3.491	58.4	40.8	47.2	163.1	121.9	55.8	86.4	117.2	209.3	4.98473e+07	3.48335e+07	4.02979e+07
High	Master Protein	P29401	Transketolase [OS=Homo sapiens]	>ProteinCenter:SwissProt|P29401 Transketolase [OS=Homo sapiens]	0	FALSE	48.673	28	14	14	40	14	623	67.8	7.66	39.57	14	metabolic process;regulation of biological process	cytosol	catalytic activity;metal ion binding;protein binding	Pf00456, Pf00676, Pf02775, Pf02779, Pf02780, Pf09364	7086	ENSG00000163931.15	TKT	3	Biosynthesis of amino acids; Pentose phosphate pathway; Metabolic pathways; Carbon metabolism	Insulin effects increased synthesis of Xylulose-5-Phosphate; Pentose phosphate pathway (hexose monophosphate shunt)	Pentose Phosphate Pathway	10	0.662	0.863	4.675	3.855	1.835	0.968	1.489	1.834	56.8	48.3	73.3	125.5	137	76.5	121.9	155.9	104.8	1.02298e+08	8.71376e+07	1.32129e+08
High	Master Protein	P02538 P02538	SWISS-PROT:P02538 Tax_Id=9606 Gene_Symbol=KRT6A Keratin, type II cytoskeletal 6A Keratin, type II cytoskeletal 6A [OS=Homo sapiens]	>P02538 SWISS-PROT:P02538 Tax_Id=9606 Gene_Symbol=KRT6A Keratin, type II cytoskeletal 6A >ProteinCenter:SwissProt|P02538 Keratin, type II cytoskeletal 6A [OS=Homo sapiens]	0	TRUE	48.623	25	14	15	39	1	564	60	8	46.19	14	cell death;cell differentiation;cell organization and biogenesis;defense response;metabolic process;regulation of biological process;response to stimulus	cytosol;membrane;nucleus	protein binding;structural molecule activity	Pf00038, Pf04111, Pf13166	3853	ENSG00000205420.10	KRT6A	12		Formation of the cornified envelope	Ectoderm Differentiation	4	100	100	100	100	100	100	100	100		39.4	592.6	87.2	76.7	21.8	7.5	52.3	22.4		2.48175e+06	3.72825e+07
High	Master Protein	Q86VP6-1	cullin-associated nedd8-dissociated protein 1 [OS=Homo sapiens]	>ProteinCenter:SwissProt|Q86VP6-1 cullin-associated nedd8-dissociated protein 1 [OS=Homo sapiens]	0	FALSE	48.598	14	15	15	41	15	1230	136.3	5.78	38.92	15	cell differentiation;cell organization and biogenesis;cellular homeostasis;metabolic process;regulation of biological process;transport	cytoplasm;cytosol;extracellular;Golgi;membrane;nucleus;organelle lumen	protein binding	Pf08623, Pf12755, Pf13513	55832	ENSG00000111530.12	CAND1	12		Neutrophil degranulation; Iron uptake and transport; Neddylation	Endoderm Differentiation	9	0.677	0.531	1.342	1.274	1.298	0.92	1.121	0.971	94.1	76.2	97.4	96	101.3	83	100.2	120.9	131	9.27118e+07	7.51042e+07	9.59077e+07
High	Master Protein	P22392-2	Isoform 3 of Nucleoside diphosphate kinase B [OS=Homo sapiens]	>ProteinCenter:SwissProt|P22392-2 Isoform 3 of Nucleoside diphosphate kinase B [OS=Homo sapiens]	0	FALSE	48.476	61	10	12	50	10	267	30.1	8.92	45.82	10	cell organization and biogenesis;cellular homeostasis;metabolic process;regulation of biological process;response to stimulus;transport	cytoplasm;cytosol;extracellular;membrane;nucleus;organelle lumen	catalytic activity;DNA binding;metal ion binding;nucleotide binding;protein binding;RNA binding	Pf00334	654364; 4830; 4831	ENSG00000011052.21	NME1-NME2; NME1; NME2	17	Metabolic pathways; Pyrimidine metabolism; Purine metabolism		Nucleotide Metabolism	4	0.613	0.528	1.599	1.933	1.096	0.51	1.51	1.15	84.7	59.3	62	131.8	154.6	87.9	53.6	153.3	112.7	4.94562e+08	3.46084e+08	3.61769e+08
High	Master Protein	P06744	glucose-6-phosphate isomerase [OS=Homo sapiens]	>ProteinCenter:SwissProt|P06744 glucose-6-phosphate isomerase [OS=Homo sapiens]	0	FALSE	48.143	34	16	16	38	11	558	63.1	8.32	29.78	16	metabolic process;regulation of biological process;response to stimulus;transport	cytoplasm;cytosol;extracellular;membrane;organelle lumen	catalytic activity;protein binding	Pf00342	2821	ENSG00000105220.14	GPI	19	Glycolysis / Gluconeogenesis; Starch and sucrose metabolism; Amino sugar and nucleotide sugar metabolism; Pentose phosphate pathway; Carbon metabolism; Metabolic pathways	Glycolysis; Neutrophil degranulation; Gluconeogenesis; TP53 Regulates Metabolic Genes	Cori Cycle; Glycolysis and Gluconeogenesis	21	0.616	0.825	5.159	5.381	2.98	1.189	1.691	2.186	48.5	33.6	41.4	181.5	237	123.3	46.2	90.2	98.4	9.55214e+07	6.62532e+07	8.15173e+07
High	Master Protein	Q01813	ATP-dependent 6-phosphofructokinase, platelet type [OS=Homo sapiens]	>ProteinCenter:SwissProt|Q01813 ATP-dependent 6-phosphofructokinase, platelet type [OS=Homo sapiens]	0	FALSE	47.908	20	14	14	38	10	784	85.5	7.55	33.58	14	metabolic process	cytoplasm;cytosol;membrane;nucleus	catalytic activity;metal ion binding;nucleotide binding;protein binding	Pf00365	5214	ENSG00000067057.16	PFKP	10	Glycolysis / Gluconeogenesis; Thyroid hormone signaling pathway; Metabolic pathways; Pentose phosphate pathway; Carbon metabolism; RNA degradation; AMPK signaling pathway; Fructose and mannose metabolism; Galactose metabolism; Biosynthesis of amino acids; Central carbon metabolism in cancer	Glycolysis	Cori Cycle; Glycolysis and Gluconeogenesis	17	0.703	0.59	1.532	1.382	1.404	0.535	0.627	0.599	109.8	82.7	70.1	175.6	141.3	118.8	56.4	62	83.3	6.52041e+07	4.91454e+07	4.16289e+07
High	Master Protein	Q562R1	Beta-actin-like protein 2 [OS=Homo sapiens]	>ProteinCenter:SwissProt|Q562R1 Beta-actin-like protein 2 [OS=Homo sapiens]	0	FALSE	47.867	18	9	15	222	1	376	42	5.59	294.18	9		cytoplasm;cytoskeleton	nucleotide binding;protein binding	Pf00022	345651	ENSG00000169067.3	ACTBL2	5				0
High	Master Protein	Q3SX14	TREMBL:Q3SX14 (Bos taurus) Similar to Gelsolin	>Q3SX14 TREMBL:Q3SX14 (Bos taurus) Similar to Gelsolin	0	TRUE	47.308	23	14	15	51	6	781	85.6	6.21	52.27	14												0	0.947	0.966	0.802	0.445	0.733	0.685	0.438	0.804	124.1	123.3	137.5	97.5	54.1	86.2	99.2	62.3	115.8	1.58797e+08	1.57749e+08	1.75934e+08
High	Master Protein	P17858-1	ATP-dependent 6-phosphofructokinase, liver type [OS=Homo sapiens]	>ProteinCenter:SwissProt|P17858-1 ATP-dependent 6-phosphofructokinase, liver type [OS=Homo sapiens]	0	FALSE	47.257	18	12	12	39	7	780	85	7.5	37.64	12	cell organization and biogenesis;metabolic process;regulation of biological process;response to stimulus;transport	cytoplasm;cytosol;extracellular;membrane;organelle lumen	catalytic activity;metal ion binding;nucleotide binding;protein binding	Pf00365	5211	ENSG00000141959.16	PFKL	21	RNA degradation; Fructose and mannose metabolism; HIF-1 signaling pathway; AMPK signaling pathway; Galactose metabolism; Biosynthesis of amino acids; Central carbon metabolism in cancer; Glycolysis / Gluconeogenesis; Pentose phosphate pathway; Glucagon signaling pathway; Metabolic pathways; Carbon metabolism	Glycolysis; Neutrophil degranulation	Photodynamic therapy-induced HIF-1 survival signaling; Insulin Signaling; Glycolysis and Gluconeogenesis	22	0.666	0.509	1.974	1.512	2.68	0.843	0.539	0.642	88.1	66.9	51.7	128.3	148.3	199.6	78.7	68.4	70	2.63143e+07	1.99761e+07	1.54554e+07
High	Master Protein	P08758	annexin A5 [OS=Homo sapiens]	>ProteinCenter:SwissProt|P08758 annexin A5 [OS=Homo sapiens]	0	TRUE	47.243	34	12	13	58	12	320	35.9	5.05	58.14	12	coagulation;regulation of biological process;response to stimulus;transport	cytoplasm;cytosol;extracellular;membrane	enzyme regulator activity;metal ion binding;protein binding	Pf00191	308	ENSG00000164111.14	ANXA5	4		Platelet degranulation	Apoptosis-related network due to altered Notch3 in ovarian cancer; Simplified Interaction Map Between LOXL4 and Oxidative Stress Pathway; Prostaglandin Synthesis and Regulation	7	0.82	0.595	1.654	2.949	1.578	0.487	1.323	0.811	96.1	84.2	60	142.9	185.3	118.2	52.5	78.3	82.3	5.04588e+08	4.42129e+08	3.1509e+08
High	Master Protein	P09543-1	2',3'-cyclic-nucleotide 3'-phosphodiesterase [OS=Homo sapiens]	>ProteinCenter:SwissProt|P09543-1 2',3'-cyclic-nucleotide 3'-phosphodiesterase [OS=Homo sapiens]	0	FALSE	47.074	30	16	16	38	16	421	47.5	9.07	37.95	16	cell communication;cell differentiation;cell organization and biogenesis;metabolic process;response to stimulus	cytoplasm;membrane	catalytic activity;nucleotide binding;RNA binding	Pf01591, Pf05881, Pf08302, Pf13207, Pf13671	1267	ENSG00000173786.16	CNP	17			Glial Cell Differentiation; Mecp2 and Associated Rett Syndrome	2	0.789	0.733	2.074	2.774	1.947	1.672	1.959	1.984	66.8	54.2	58.9	110.5	140.9	103.1	114.8	114.2	136.5	1.17303e+08	9.51276e+07	1.034e+08
High	Master Protein	Q86VI3	Ras GTPase-activating-like protein IQGAP3 [OS=Homo sapiens]	>ProteinCenter:SwissProt|Q86VI3 Ras GTPase-activating-like protein IQGAP3 [OS=Homo sapiens]	0	FALSE	47.025	10	14	15	32	10	1631	184.6	7.65	35.19	14	cell organization and biogenesis;metabolic process;regulation of biological process;response to stimulus	cytoplasm;cytosol	protein binding	Pf00307, Pf00612, Pf00616, Pf03836	128239	ENSG00000183856.10	IQGAP3	1	Regulation of actin cytoskeleton	RHO GTPases activate IQGAPs		5	0.712	0.637	3.456	3.339	2.089	1.327	1.636	3.065	54	36	41.8	167.6	170.5	97.6	91.5	78.9	162	1.73305e+07	1.15636e+07	1.34175e+07
High	Master Protein	P04899-1	guanine nucleotide-binding protein G(i) subunit alpha-2 [OS=Homo sapiens]	>ProteinCenter:SwissProt|P04899-1 guanine nucleotide-binding protein G(i) subunit alpha-2 [OS=Homo sapiens]	0	FALSE	47.023	41	12	14	56	5	355	40.4	5.54	58.6	12	cell division;cell proliferation;metabolic process;regulation of biological process;response to stimulus	cytoplasm;cytoskeleton;cytosol;membrane;nucleus	catalytic activity;metal ion binding;nucleotide binding;protein binding;signal transducer activity	Pf00025, Pf00503	2771	ENSG00000114353.16	GNAI2	3	Glutamatergic synapse; Retrograde endocannabinoid signaling; Dopaminergic synapse; Toxoplasmosis; Cholinergic synapse; Morphine addiction; Chemokine signaling pathway; Rap1 signaling pathway; Sphingolipid signaling pathway; Serotonergic synapse; Parkinson's disease; Adrenergic signaling in cardiomyocytes; Estrogen signaling pathway; Oxytocin signaling pathway; GABAergic synapse; cGMP-PKG signalin…	G alpha (z) signalling events; Cooperation of PDCL (PhLP1) and TRiC/CCT in G-protein beta folding; G alpha (s) signalling events; PLC beta mediated events; ADP signalling through P2Y purinoceptor 12; Adrenaline,noradrenaline inhibits insulin secretion; Adenylate cyclase inhibitory pathway; G-protein activation	Human Thyroid Stimulating Hormone (TSH) signaling pathway; Corticotropin-releasing hormone signaling pathway; Signal Transduction of S1P Receptor; G Protein Signaling Pathways; Chemokine signaling pathway; Calcium Regulation in the Cardiac Cell	70	0.79	0.501	1.485	2.361	1.824	0.632	0.863	0.98	79.8	62.6	46.9	143.2	194.4	159.2	50.9	81.4	81.7	7.64457e+07	6.00044e+07	4.4905e+07
High	Master Protein	P11387	DNA topoisomerase 1 [OS=Homo sapiens]	>ProteinCenter:SwissProt|P11387 DNA topoisomerase 1 [OS=Homo sapiens]	0	FALSE	47.002	19	13	13	28	13	765	90.7	9.31	37.3	13	cell death;cell division;cell organization and biogenesis;metabolic process;regulation of biological process;response to stimulus	chromosome;cytoplasm;nucleus	catalytic activity;DNA binding;nucleotide binding;protein binding;RNA binding	Pf01028, Pf02919, Pf14370	7150	ENSG00000198900.5	TOP1	20		SUMOylation of DNA replication proteins		5	0.846	0.694	1.051	0.965	0.872	0.869	1.041	0.515	113.8	98.3	82.9	112.8	106.6	100	108	120.6	57	1.2273e+08	1.06007e+08	8.93787e+07
High	Master Protein	P51148	Ras-related protein Rab-5C [OS=Homo sapiens]	>ProteinCenter:SwissProt|P51148 Ras-related protein Rab-5C [OS=Homo sapiens]	0	FALSE	46.973	50	10	11	51	7	216	23.5	8.41	60.37	10	regulation of biological process;response to stimulus;transport	endosome;membrane	catalytic activity;nucleotide binding;protein binding	Pf00009, Pf00025, Pf00071, Pf04670, Pf08477	5878	ENSG00000108774.14	RAB5C	17	Vasopressin-regulated water reabsorption; Amoebiasis; Ras signaling pathway; Tuberculosis; Phagosome; Endocytosis	TBC/RABGAPs; Neutrophil degranulation; Clathrin-mediated endocytosis; Golgi Associated Vesicle Biogenesis; RAB GEFs exchange GTP for GDP on RABs; RAB geranylgeranylation		21	0.9	0.845	1.273	1.633	1.094	1.074	1.583	1.316	84.5	73.8	75.2	105.1	154.6	106.4	95.2	100.8	104.5	8.44651e+07	7.37873e+07	7.5187e+07
High	Master Protein	P04259	keratin, type II cytoskeletal 6B [OS=Homo sapiens]	>ProteinCenter:SwissProt|P04259 keratin, type II cytoskeletal 6B [OS=Homo sapiens]	0	FALSE	46.819	23	14	15	37	1	564	60	8	46.22	14	cell death;cell organization and biogenesis;metabolic process	cytosol	catalytic activity;motor activity;protein binding;structural molecule activity	Pf00038, Pf01576, Pf04111, Pf13166	3854	ENSG00000185479.5	KRT6B	12		Formation of the cornified envelope		3			100	100	100							285.1	357.2	257.7
High	Master Protein	Q9UHD8-1	Septin-9 [OS=Homo sapiens]	>ProteinCenter:SwissProt|Q9UHD8-1 Septin-9 [OS=Homo sapiens]	0	FALSE	46.636	27	15	15	47	15	586	65.4	8.97	55.21	15	cell division;cell organization and biogenesis;regulation of biological process	cytoplasm;cytoskeleton	catalytic activity;nucleotide binding;protein binding	Pf00735, Pf01926, Pf03193, Pf04548	10801	ENSG00000184640.17	SEPT9	17	Bacterial invasion of epithelial cells			1	0.744	0.935	1.383	2.011	1.259	1.33	2.696	2.758	66.5	50.8	68.7	86.2	116.5	76.6	104	129.4	201.3	8.09919e+07	6.18421e+07	8.36574e+07
High	Master Protein	P62834	ras-related protein Rap-1A [OS=Homo sapiens]	>ProteinCenter:SwissProt|P62834 ras-related protein Rap-1A [OS=Homo sapiens]	0	FALSE	46.596	51	10	10	56	1	184	21	6.67	52.52	10	cell organization and biogenesis;cellular homeostasis;regulation of biological process;response to stimulus;transport	cytoplasm;cytosol;endosome;membrane	catalytic activity;nucleotide binding;protein binding;transporter activity	Pf00009, Pf00071, Pf08477	5906	ENSG00000116473.14	RAP1A	1	Long-term potentiation; Neurotrophin signaling pathway; Platelet activation; Ras signaling pathway; Pancreatic secretion; MAPK signaling pathway; cAMP signaling pathway; Leukocyte transendothelial migration; Renal cell carcinoma; Rap1 signaling pathway; Chemokine signaling pathway; Focal adhesion	Signaling by BRAF and RAF fusions; MAP2K and MAPK activation; Glucagon-like Peptide-1 (GLP1) regulates insulin secretion; ARMS-mediated activation; GRB2:SOS provides linkage to MAPK signaling for Integrins ; MET activates RAP1 and RAC1; Signaling by RAS mutants; Signaling by high-kinase activity BRAF mutants; Signaling by moderate kinase activity BRAF mutants; p130Cas linkage to MAPK signaling fo…	Integrin-mediated Cell Adhesion; Integrated Breast Cancer Pathway; Human Thyroid Stimulating Hormone (TSH) signaling pathway; Brain-Derived Neurotrophic Factor (BDNF) signaling pathway; Common Pathways Underlying Drug Addiction; Focal Adhesion; Signaling of Hepatocyte Growth Factor Receptor; MAPK Signaling Pathway; VEGFA-VEGFR2 Signaling Pathway; Chemokine signaling pathway; EGF/EGFR Signaling Pa…	67	0.728	0.473	0.592	3.787	3.389	2.989	3.059	1.254	52.1	38	24.6	30.9	197.4	176.6	155.8	159.4	65.3	5.45791e+06	3.97578e+06	2.58076e+06
High	Master Protein	Q07020	60S ribosomal protein L18 [OS=Homo sapiens]	>ProteinCenter:SwissProt|Q07020 60S ribosomal protein L18 [OS=Homo sapiens]	0	FALSE	46.39	48	11	11	37	11	188	21.6	11.72	41.38	11	cell organization and biogenesis;metabolic process;transport	cytoplasm;cytosol;endoplasmic reticulum;membrane;nucleus;ribosome	RNA binding;structural molecule activity	Pf00828	6141	ENSG00000063177.12	RPL18	19	Ribosome	Peptide chain elongation; Eukaryotic Translation Termination; Viral mRNA Translation; L13a-mediated translational silencing of Ceruloplasmin expression; Nonsense Mediated Decay (NMD) independent of the Exon Junction Complex (EJC); Selenocysteine synthesis; Nonsense Mediated Decay (NMD) enhanced by the Exon Junction Complex (EJC); GTP hydrolysis and joining of the 60S ribosomal subunit; Major path…	Cytoplasmic Ribosomal Proteins	34	0.78	0.905	1.748	1.366	1.11	0.775	1.429	1.125	92	72.5	87.8	157.3	87.4	75.5	95.5	138.3	93.8	2.96353e+08	2.3344e+08	2.82746e+08
High	Master Protein	P25705-1	ATP synthase subunit alpha, mitochondrial [OS=Homo sapiens]	>ProteinCenter:SwissProt|P25705-1 ATP synthase subunit alpha, mitochondrial [OS=Homo sapiens]	0	FALSE	46.266	32	13	13	37	13	553	59.7	9.13	23.38	13	cell organization and biogenesis;metabolic process;regulation of biological process;transport	membrane;mitochondrion;organelle lumen	catalytic activity;nucleotide binding;protein binding;RNA binding;transporter activity	Pf00006, Pf00306, Pf02663, Pf02874, Pf05943	498	ENSG00000152234.15	ATP5A1	18	Alzheimer's disease; Metabolic pathways; Parkinson's disease; Oxidative phosphorylation; Huntington's disease	Cristae formation; Mitochondrial protein import; Formation of ATP by chemiosmotic coupling	Electron Transport Chain; Oxidative phosphorylation	16	1.232	1.751	15.263	22.127	0.917	1.45	4.846	5.29	21.3	36.9	56.1	274.3	243.6	8.9	28	85.2	145.9	1.63246e+07	2.82393e+07	4.2945e+07
High	Master Protein	P49411	elongation factor Tu, mitochondrial [OS=Homo sapiens]	>ProteinCenter:SwissProt|P49411 elongation factor Tu, mitochondrial [OS=Homo sapiens]	0	FALSE	46.061	38	12	12	27	12	452	49.5	7.61	26.43	12	metabolic process;response to stimulus	membrane;mitochondrion	catalytic activity;nucleotide binding;protein binding;RNA binding	Pf00009, Pf03143, Pf03144	7284		TUFM	16		Mitochondrial translation elongation		4	0.94	1.035	13.531	8.334	0.621	0.858	3.976	4.599	25.2	24.3	28.8	329.5	236.8	9.9	24.7	101.6	119.2	1.65368e+07	1.58968e+07	1.88746e+07
High	Master Protein	P63000-2	Isoform B of Ras-related C3 botulinum toxin substrate 1 [OS=Homo sapiens]	>ProteinCenter:SwissProt|P63000-2 Isoform B of Ras-related C3 botulinum toxin substrate 1 [OS=Homo sapiens]	0	FALSE	46.013	39	9	11	56	4	211	23.5	8.63	65.06	9	cell organization and biogenesis;cell proliferation;cellular component movement;coagulation;defense response;metabolic process;regulation of biological process;response to stimulus;transport	cytoplasm;cytosol;membrane	catalytic activity;nucleotide binding;protein binding	Pf00071, Pf08477	5879	ENSG00000136238.17	RAC1	7			Androgen receptor signaling pathway; Nucleotide-binding Oligomerization Domain (NOD) pathway; Regulation of toll-like receptor signaling pathway; Target Of Rapamycin (TOR) Signaling; Physiological and Pathological Hypertrophy of the Heart; MicroRNAs in cardiomyocyte hypertrophy; Integrin-mediated Cell Adhesion; RANKL/RANK (Receptor activator of NFKB (ligand)) Signaling Pathway; Leptin signaling p…	41	1.008	1.318	1.653	1.432	1.403	1.386	1.819	2.009	69.3	62.2	67.6	136	166.9	129.9	97.1	77	94.1	1.2462e+08	1.11821e+08	1.2155e+08
High	Master Protein	P18124	60S ribosomal protein L7 [OS=Homo sapiens]	>ProteinCenter:SwissProt|P18124 60S ribosomal protein L7 [OS=Homo sapiens]	0	FALSE	46.005	44	15	16	58	15	248	29.2	10.65	67.29	15	cell organization and biogenesis;metabolic process;transport	cytoplasm;cytosol;membrane;nucleus;ribosome	DNA binding;protein binding;RNA binding;structural molecule activity	Pf00327, Pf08079	6129	ENSG00000147604.13	RPL7	8	Ribosome	Peptide chain elongation; Eukaryotic Translation Termination; Viral mRNA Translation; L13a-mediated translational silencing of Ceruloplasmin expression; Nonsense Mediated Decay (NMD) independent of the Exon Junction Complex (EJC); Selenocysteine synthesis; Nonsense Mediated Decay (NMD) enhanced by the Exon Junction Complex (EJC); GTP hydrolysis and joining of the 60S ribosomal subunit; Major path…	Cytoplasmic Ribosomal Proteins	34	0.739	0.911	1.699	1.691	0.946	1.005	1.153	1.155	98.9	73.4	95	142.8	110.3	64.4	94.1	110.9	110.2	3.35836e+08	2.49331e+08	3.22702e+08
High	Master Protein	P62701	40S ribosomal protein S4, X isoform [OS=Homo sapiens]	>ProteinCenter:SwissProt|P62701 40S ribosomal protein S4, X isoform [OS=Homo sapiens]	0	FALSE	45.967	43	12	14	58	12	263	29.6	10.15	57.22	12	cell organization and biogenesis;development;metabolic process;regulation of biological process;transport	cytoplasm;cytosol;membrane;ribosome	protein binding;RNA binding;structural molecule activity	Pf00900, Pf08071	6191	ENSG00000198034.10	RPS4X	X	Ribosome	Peptide chain elongation; Eukaryotic Translation Termination; Viral mRNA Translation; Formation of the ternary complex, and subsequently, the 43S complex; L13a-mediated translational silencing of Ceruloplasmin expression; Selenocysteine synthesis; Nonsense Mediated Decay (NMD) independent of the Exon Junction Complex (EJC); Nonsense Mediated Decay (NMD) enhanced by the Exon Junction Complex (EJC)…	Cytoplasmic Ribosomal Proteins	38	1.059	1.055	2.153	1.229	0.906	1.414	1.768	1.811	74.2	88.3	97.5	124.8	85.9	66.4	113.8	114.4	134.5	3.99327e+08	4.75434e+08	5.25046e+08
High	Master Protein	O43795	Unconventional myosin-Ib [OS=Homo sapiens]	>ProteinCenter:SwissProt|O43795 Unconventional myosin-Ib [OS=Homo sapiens]	0	FALSE	45.886	14	15	15	37	15	1136	131.9	9.38	37.75	15	cell organization and biogenesis;cellular component movement;transport	cytoplasm;endosome;membrane	catalytic activity;motor activity;nucleotide binding;protein binding	Pf00063, Pf06017	4430	ENSG00000128641.18	MYO1B	2				0	0.593	0.568	0.294	0.419	0.229	1.415	2.628	2.188	91.8	53.9	54.1	25.2	32.8	17.5	108	291	225.5	1.13872e+08	6.68967e+07	6.71429e+07
High	Master Protein	Q9UM54-6	Isoform 6 of Unconventional myosin-VI [OS=Homo sapiens]	>ProteinCenter:SwissProt|Q9UM54-6 Isoform 6 of Unconventional myosin-VI [OS=Homo sapiens]	0	FALSE	45.872	13	15	15	23	15	1285	148.6	8.56	23.87	15	cellular component movement;regulation of biological process;response to stimulus;transport	cytoplasm;cytosol;Golgi;membrane;nucleus	catalytic activity;motor activity;nucleotide binding;protein binding	Pf00063, Pf00529	4646		MYO6	6			VEGFA-VEGFR2 Signaling Pathway	1	0.704	0.884	5.853	6.595	4.063	1.306	2.065	1.995	33.5	20.7	27.4	254.3	290	159.1	21.6	50	43.4	8.96369e+06	5.53909e+06	7.34776e+06
High	Master Protein	P08754	Guanine nucleotide-binding protein G(k) subunit alpha [OS=Homo sapiens]	>ProteinCenter:SwissProt|P08754 Guanine nucleotide-binding protein G(k) subunit alpha [OS=Homo sapiens]	0	FALSE	45.44	42	14	15	62	7	354	40.5	5.69	61.7	14	cell division;cell organization and biogenesis;metabolic process;regulation of biological process;response to stimulus;transport	cytoplasm;cytoskeleton;Golgi;membrane;nucleus	catalytic activity;metal ion binding;nucleotide binding;protein binding;signal transducer activity	Pf00025, Pf00503	2773	ENSG00000065135.10	GNAI3	1	Circadian entrainment; Alcoholism; Renin secretion; Cocaine addiction; Chagas disease (American trypanosomiasis); Melanogenesis; Platelet activation; Gap junction; cAMP signaling pathway; Progesterone-mediated oocyte maturation; Gastric acid secretion; Glutamatergic synapse; Retrograde endocannabinoid signaling; Pertussis; Regulation of lipolysis in adipocytes; Morphine addiction; Chemokine signa…	G alpha (z) signalling events; Cooperation of PDCL (PhLP1) and TRiC/CCT in G-protein beta folding; G alpha (s) signalling events; PLC beta mediated events; ADP signalling through P2Y purinoceptor 12; Adenylate cyclase inhibitory pathway; G-protein activation	Human Thyroid Stimulating Hormone (TSH) signaling pathway; Signal Transduction of S1P Receptor; G Protein Signaling Pathways; Chemokine signaling pathway; Calcium Regulation in the Cardiac Cell	65	0.654	0.603	3.516	5.578	4.044	0.964	1.984	1.433	53.5	38.4	33.3	154.3	233.4	150	54.8	101.1	81.3	5.19763e+07	3.72591e+07	3.23463e+07
High	Master Protein	ENSEMBL:ENSBTAP00000037665	(Bos taurus) similar to Pregnancy zone protein, partial	>ENSEMBL:ENSBTAP00000037665 (Bos taurus) similar to Pregnancy zone protein, partial	0	TRUE	45.309	27	11	12	50	11	578	65.2	7.01	46.4	11												0	1.365	0.779	0.467	0.204	0.99	0.613	0.345	0.313	144.6	233.9	133.3	57.9	23.3	104.6	111	41.4	50	7.133e+08	1.15348e+09	6.572e+08
High	Master Protein	P61160-1	Actin-related protein 2 [OS=Homo sapiens]	>ProteinCenter:SwissProt|P61160-1 Actin-related protein 2 [OS=Homo sapiens]	0	FALSE	45.294	37	11	13	27	11	394	44.7	6.74	26.44	11	cell division;cell organization and biogenesis;cellular component movement;regulation of biological process;response to stimulus;transport	cytoplasm;cytoskeleton;cytosol;extracellular;membrane;organelle lumen	nucleotide binding;protein binding;structural molecule activity	Pf00022	10097	ENSG00000138071.13	ACTR2	2		EPHB-mediated forward signaling; Neutrophil degranulation; Clathrin-mediated endocytosis; RHO GTPases Activate WASPs and WAVEs; Regulation of actin dynamics for phagocytic cup formation	Association Between Physico-Chemical Features and Toxicity Associated Pathways; ESC Pluripotency Pathways	18	0.725	0.627	5.688	9.436	7.179	0.857	1.556	1.377	31.7	26	20.2	161.4	303.8	240.3	29.1	46.1	41.4	1.68313e+07	1.38207e+07	1.07511e+07
High	Master Protein	P01966	SWISS-PROT:P01966 (Bos taurus) Hemoglobin subunit alpha	>P01966 SWISS-PROT:P01966 (Bos taurus) Hemoglobin subunit alpha	0	TRUE	45.174	87	8	10	72	5	142	15.2	8.44	53.76	8	transport		metal ion binding;protein binding;transporter activity	Pf00042	100140149; 512439	ENSBTAG00000026418.1; ENSBTAG00000026417.1	HBA1; HBA	25	Malaria; African trypanosomiasis	Erythrocytes take up carbon dioxide and release oxygen; Scavenging of heme from plasma; Erythrocytes take up oxygen and release carbon dioxide	Effects of Nitric Oxide	10	0.842	0.645	1.287	1.059	1.673	0.453	0.401	0.417	96	100.5	61.5	140	127.4	230	42.6	62.7	39.2	3.59212e+08	3.76375e+08	2.30306e+08
High	Master Protein	Q04917	14-3-3 protein eta [OS=Homo sapiens]	>ProteinCenter:SwissProt|Q04917 14-3-3 protein eta [OS=Homo sapiens]	0	FALSE	45.079	44	12	13	38	8	246	28.2	4.84	40.75	12	cell organization and biogenesis;metabolic process;regulation of biological process;response to stimulus;transport	cytoplasm;cytosol;membrane;mitochondrion	catalytic activity;protein binding	Pf00244	7533	ENSG00000128245.14	YWHAH	22	Oocyte meiosis; Viral carcinogenesis; Cell cycle; Epstein-Barr virus infection; PI3K-Akt signaling pathway; Hippo signaling pathway	Translocation of GLUT4 to the plasma membrane; Chk1/Chk2(Cds1) mediated inactivation of Cyclin B:Cdk1 complex; TP53 Regulates Metabolic Genes; Activation of BAD and translocation to mitochondria ; RHO GTPases activate PKNs	Cell Cycle; Myometrial Relaxation and Contraction Pathways; Calcium Regulation in the Cardiac Cell; Sudden Infant Death Syndrome (SIDS) Susceptibility Pathways	32	0.719	0.68	1.872	5.264	3.381	0.962	2.301	1.251	83.1	64.7	84.8	98.8	144.2	82.9	83.7	133.2	124.7	9.23199e+07	7.17881e+07	9.41378e+07
High	Master Protein	P22234	multifunctional protein ADE2 [OS=Homo sapiens]	>ProteinCenter:SwissProt|P22234 multifunctional protein ADE2 [OS=Homo sapiens]	0	FALSE	44.781	29	11	11	38	11	425	47	7.23	46.1	11	metabolic process	cytoplasm;cytosol;membrane	catalytic activity;nucleotide binding;protein binding	Pf00731, Pf01259	10606	ENSG00000128050.8	PAICS	4	Metabolic pathways; Purine metabolism	Purine ribonucleoside monophosphate biosynthesis		6	0.799	0.831	1.866	2.734	1.424	1.179	2.077	2.436	71.5	62.2	81.3	82.9	105.1	56.2	107.2	113.4	220.2	9.1486e+07	7.95417e+07	1.0406e+08
High	Master Protein	P12259	Coagulation factor V [OS=Homo sapiens]	>ProteinCenter:SwissProt|P12259 Coagulation factor V [OS=Homo sapiens]	0	FALSE	44.716	5	13	14	58	1	2224	251.5	6.05	51.36	13	cell organization and biogenesis;coagulation;metabolic process;response to stimulus;transport	endoplasmic reticulum;extracellular;Golgi;membrane;organelle lumen	metal ion binding;protein binding	Pf00754, Pf07732	2153	ENSG00000198734.10	F5	1	Complement and coagulation cascades	Platelet degranulation ; Post-translational protein phosphorylation; Regulation of Insulin-like Growth Factor (IGF) transport and uptake by Insulin-like Growth Factor Binding Proteins (IGFBPs); Common Pathway of Fibrin Clot Formation; Cargo concentration in the ER; COPII (Coat Protein 2) Mediated Vesicle Transport	Blood Clotting Cascade; Complement and Coagulation Cascades	20	100		100		100					110.8		461.1		328					485038
High	Master Protein	ENSEMBL:ENSBTAP00000032840	(Bos taurus) similar to apolipoprotein B, partial	>ENSEMBL:ENSBTAP00000032840 (Bos taurus) similar to apolipoprotein B, partial	0	TRUE	44.581	15	14	15	36	12	825	92.2	7.03	43.56	14												0	0.64	0.541	0.273	0.358	0.372	0.326	0.227	0.392	200.5	140.9	139.1	58.8	70.2	81.8	74.2	55	79.6	2.19583e+08	1.54234e+08	1.52276e+08
High	Master Protein	Q13200	26S proteasome non-ATPase regulatory subunit 2 [OS=Homo sapiens]	>ProteinCenter:SwissProt|Q13200 26S proteasome non-ATPase regulatory subunit 2 [OS=Homo sapiens]	0	FALSE	44.481	13	9	9	40	9	908	100.1	5.2	45.22	9	metabolic process;regulation of biological process;response to stimulus;transport	cytoplasm;cytosol;extracellular;membrane;nucleus;organelle lumen;proteasome	catalytic activity;enzyme regulator activity;nucleotide binding;protein binding	Pf01851	5708	ENSG00000175166.16	PSMD2	3	Proteasome; Epstein-Barr virus infection	Regulation of RAS by GAPs; CDT1 association with the CDC6:ORC:origin complex; Downstream TCR signaling; UCH proteinases; NIK-->noncanonical NF-kB signaling; Hh mutants that don't undergo autocatalytic processing are degraded by ERAD; SCF-beta-TrCP mediated degradation of Emi1; Neutrophil degranulation; Cross-presentation of soluble exogenous antigens (endosomes); Separation of Sister Chromatids; …	Proteasome Degradation; TNF alpha Signaling Pathway; Parkin-Ubiquitin Proteasomal System pathway	154	0.816	0.814	0.815	0.544	0.542	0.755	0.738	0.833	126.7	106.5	115.7	107.8	67.6	64.6	104.4	90.7	116	1.34012e+08	1.12649e+08	1.22379e+08
High	Master Protein	P62249	40S ribosomal protein S16 [OS=Homo sapiens]	>ProteinCenter:SwissProt|P62249 40S ribosomal protein S16 [OS=Homo sapiens]	0	FALSE	44.354	52	10	11	52	10	146	16.4	10.21	45.57	10	cell organization and biogenesis;metabolic process;transport	cytosol;membrane;ribosome	protein binding;RNA binding;structural molecule activity	Pf00380	6217	ENSG00000105193.8	RPS16	19	Ribosome	Peptide chain elongation; Eukaryotic Translation Termination; Viral mRNA Translation; Formation of the ternary complex, and subsequently, the 43S complex; L13a-mediated translational silencing of Ceruloplasmin expression; Selenocysteine synthesis; Nonsense Mediated Decay (NMD) independent of the Exon Junction Complex (EJC); Nonsense Mediated Decay (NMD) enhanced by the Exon Junction Complex (EJC)…	Cytoplasmic Ribosomal Proteins	38	0.794	0.549	2.616	1.711	1.264	0.893	1.823	1.351	79	63.5	53.8	192.2	120.5	89.2	66.3	126.4	109.1	2.03671e+08	1.63848e+08	1.38607e+08
High	Master Protein	Q07157	Tight junction protein ZO-1 [OS=Homo sapiens]	>ProteinCenter:SwissProt|Q07157 Tight junction protein ZO-1 [OS=Homo sapiens]	0	FALSE	44.195	9	12	13	34	12	1748	195.3	6.7	37.23	12	cell communication;cell organization and biogenesis;regulation of biological process;response to stimulus	cytoplasm;cytosol;membrane	protein binding	Pf00018, Pf00595, Pf00625, Pf00791, Pf07653, Pf13180	7082	ENSG00000104067.16	TJP1	15	Gap junction; Vibrio cholerae infection; Salmonella infection; Tight junction; Epithelial cell signaling in Helicobacter pylori infection; Adherens junction	c-src mediated regulation of Cx43 function and closure of gap junctions; Signaling by Hippo; RUNX1 regulates expression of components of tight junctions; Apoptotic cleavage of cell adhesion proteins		23	0.631	0.683	2.412	4.079	2.123	0.847	1.603	1.812	68.7	39.5	35.8	152.6	235.6	133.3	39.4	85.3	109.7	1.75249e+07	1.00708e+07	9.13943e+06
High	Master Protein	P14868	Aspartate--tRNA ligase, cytoplasmic [OS=Homo sapiens]	>ProteinCenter:SwissProt|P14868 Aspartate--tRNA ligase, cytoplasmic [OS=Homo sapiens]	0	FALSE	44.12	29	12	12	53	12	501	57.1	6.55	57.41	12	cell organization and biogenesis;metabolic process	cytoplasm;cytosol;membrane	catalytic activity;nucleotide binding;protein binding;RNA binding	Pf00152, Pf01336	1615	ENSG00000115866.10	DARS	2	Aminoacyl-tRNA biosynthesis	Cytosolic tRNA aminoacylation; SeMet incorporation into proteins	Alanine and aspartate metabolism	10	0.7	0.622	1.683	1.673	1.149	1.209	1.671	1.563	79.2	65.1	62.3	139.7	103.8	82.5	102.5	129.4	135.4	6.71848e+07	5.52616e+07	5.28313e+07
High	Master Protein	P37802	Transgelin-2 [OS=Homo sapiens]	>ProteinCenter:SwissProt|P37802 Transgelin-2 [OS=Homo sapiens]	0	FALSE	43.585	58	9	12	56	9	199	22.4	8.25	53.42	9	cell differentiation;transport	cytosol;extracellular	protein binding	Pf00307, Pf00402	8407	ENSG00000158710.14	TAGLN2	1		Platelet degranulation		4	0.758	0.707	4.837	4.233	3.065	1.258	2.514	2.045	39.7	28.8	29.6	203.3	218.2	151.2	48.7	95.7	84.9	1.15454e+08	8.37092e+07	8.60359e+07
High	Master Protein	P61254	60S ribosomal protein L26 [OS=Homo sapiens]	>ProteinCenter:SwissProt|P61254 60S ribosomal protein L26 [OS=Homo sapiens]	0	FALSE	43.568	45	11	12	44	1	145	17.2	10.55	54.23	11	cell organization and biogenesis;metabolic process;regulation of biological process;response to stimulus;transport	cytoplasm;cytosol;membrane;ribosome	protein binding;RNA binding;structural molecule activity	Pf00467	6154	ENSG00000161970.12	RPL26	17	Ribosome	Peptide chain elongation; Eukaryotic Translation Termination; Viral mRNA Translation; L13a-mediated translational silencing of Ceruloplasmin expression; Nonsense Mediated Decay (NMD) independent of the Exon Junction Complex (EJC); Selenocysteine synthesis; Nonsense Mediated Decay (NMD) enhanced by the Exon Junction Complex (EJC); GTP hydrolysis and joining of the 60S ribosomal subunit; Major path…	Cytoplasmic Ribosomal Proteins	34	1.269	1.76	0.01	0.919	0.01	1.703	3.08	2.696	72.4	91.9	127.5		66.6		123.3	223	195.3	3.42683e+07	4.34695e+07	6.03217e+07
High	Master Protein	P09651-1	Heterogeneous nuclear ribonucleoprotein A1 [OS=Homo sapiens]	>ProteinCenter:SwissProt|P09651-1 Heterogeneous nuclear ribonucleoprotein A1 [OS=Homo sapiens]	0	FALSE	43.41	28	8	10	32	8	372	38.7	9.13	36.95	8	cell communication;metabolic process;regulation of biological process;response to stimulus;transport	cytoplasm;membrane;nucleus;spliceosomal complex	DNA binding;protein binding;RNA binding	Pf00076, Pf13893, Pf14259	3178	ENSG00000135486.17	HNRNPA1	12	Spliceosome	mRNA Splicing - Major Pathway; FGFR2 alternative splicing	mRNA Processing	11	0.678	0.798	5.632	2.439	0.529	2.562	10.652	6.597	21.7	14.2	17.7	208.5	119.9	32	65.7	246	174.3	2.00437e+07	1.30724e+07	1.62935e+07
High	Master Protein	Q14974	Importin subunit beta-1 [OS=Homo sapiens]	>ProteinCenter:SwissProt|Q14974 Importin subunit beta-1 [OS=Homo sapiens]	0	FALSE	43.329	20	14	14	49	14	876	97.1	4.78	60.48	14	cell organization and biogenesis;cellular component movement;metabolic process;regulation of biological process;response to stimulus;transport	cytoplasm;cytosol;extracellular;membrane;nucleus;organelle lumen	metal ion binding;protein binding;RNA binding;transporter activity	Pf02985, Pf03810, Pf13513, Pf13646	3837	ENSG00000108424.9	KPNB1	17	RNA transport	ISG15 antiviral mechanism; NS1 Mediated Effects on Host Pathways; Nuclear import of Rev protein; Neutrophil degranulation; Regulation of cholesterol biosynthesis by SREBP (SREBF); Transport of Ribonucleoproteins into the Host Nucleus; Activation of DNA fragmentation factor	Sterol Regulatory Element-Binding Proteins (SREBP) signalling	29	0.636	0.632	1.968	2.362	1.215	1.096	2.18	2.234	67.8	46.1	53.7	121.9	122.5	64.4	95.2	137.4	191.2	1.29602e+08	8.81507e+07	1.02622e+08
High	Master Protein	P02533	Keratin, type I cytoskeletal 14 [OS=Homo sapiens]	>ProteinCenter:SwissProt|P02533 Keratin, type I cytoskeletal 14 [OS=Homo sapiens]	0	TRUE	43.127	24	12	15	43	3	472	51.5	5.16	49.46	12	cell death;cell differentiation;cell organization and biogenesis;response to stimulus	cytoplasm;cytosol;nucleus	protein binding;structural molecule activity	Pf00038, Pf13514	3861	ENSG00000186847.5	KRT14	17		Formation of the cornified envelope; Type I hemidesmosome assembly	Corticotropin-releasing hormone signaling pathway	7	100	100	100	100	100	100	100	100		24.4	211.2	104.1	113.5	76.4	70.3	92.2	207.9		1.96154e+06	1.69995e+07
High	Master Protein	Q9UHN6-1	Cell surface hyaluronidase [OS=Homo sapiens]	>ProteinCenter:SwissProt|Q9UHN6-1 Cell surface hyaluronidase [OS=Homo sapiens]	0	FALSE	43.113	11	13	13	39	13	1383	154.3	8.15	38.54	13	development;metabolic process	membrane	catalytic activity;metal ion binding;protein binding	Pf10162	23670	ENSG00000135048.13	TMEM2	9				0	0.817	0.949	4.978	6.533	5.158	8.935	9.943	7.434	13.8	5.8	10.8	98.6	124.2	98.6	192.9	197.4	158	6.07539e+06	2.5366e+06	4.74585e+06
High	Master Protein	P55786	puromycin-sensitive aminopeptidase [OS=Homo sapiens]	>ProteinCenter:SwissProt|P55786 puromycin-sensitive aminopeptidase [OS=Homo sapiens]	0	FALSE	43.057	16	14	14	49	14	919	103.2	5.72	55.45	14	metabolic process;response to stimulus	cytoplasm;cytosol;nucleus	catalytic activity;metal ion binding	Pf01433, Pf11838, Pf13485	9520	ENSG00000141279.15	NPEPPS	17		Antigen processing: Ubiquitination & Proteasome degradation		4	0.707	0.827	1.134	1.279	1.045	0.672	0.891	0.939	106.2	79.6	89	116.2	134.4	102.5	72	94.9	105.2	7.59378e+07	5.6875e+07	6.35872e+07
High	Master Protein	P11234	Ras-related protein Ral-B [OS=Homo sapiens]	>ProteinCenter:SwissProt|P11234 Ras-related protein Ral-B [OS=Homo sapiens]	0	FALSE	42.909	31	10	11	54	7	206	23.4	6.62	68.81	10	cell communication;cell death;cell division;regulation of biological process;response to stimulus	membrane;vacuole	catalytic activity;nucleotide binding;protein binding	Pf00025, Pf00071, Pf08477	5899	ENSG00000144118.13	RALB	2	Pathways in cancer; Pancreatic cancer; Rap1 signaling pathway; Ras signaling pathway; Phospholipase D signaling pathway	p38MAPK events	EGF/EGFR Signaling Pathway	13	0.781	0.68	3.419	4.243	3.008	1.028	1.283	1.173	52.7	52.5	72.7	111.9	210	118.1	84.3	107.1	90.7	2.10107e+07	2.09406e+07	2.89665e+07
High	Master Protein	Q9UK41-1	vacuolar protein sorting-associated protein 28 homolog [OS=Homo sapiens]	>ProteinCenter:SwissProt|Q9UK41-1 vacuolar protein sorting-associated protein 28 homolog [OS=Homo sapiens]	0	FALSE	42.89	54	11	11	37	11	221	25.4	5.54	41.7	11	cell communication;cell organization and biogenesis;metabolic process;regulation of biological process;response to stimulus;transport	cytoplasm;cytosol;endosome;membrane	protein binding	Pf03997	51160	ENSG00000160948.13	VPS28	8	Endocytosis	Budding and maturation of HIV virion; Endosomal Sorting Complex Required For Transport (ESCRT); Membrane binding and targetting of GAG proteins		13	0.788	0.678	0.944	0.998	1.731	0.658	0.905	0.348	121	88.6	98.5	98.4	125.6	183.7	80.9	64.5	38.9	1.06447e+08	7.79383e+07	8.66859e+07
High	Master Protein	Q05639	Elongation factor 1-alpha 2 [OS=Homo sapiens]	>ProteinCenter:SwissProt|Q05639 Elongation factor 1-alpha 2 [OS=Homo sapiens]	0	FALSE	42.852	24	10	10	88	1	463	50.4	9.03	107.33	10	metabolic process;regulation of biological process;response to stimulus	cytoplasm;nucleus	catalytic activity;nucleotide binding;protein binding;RNA binding	Pf00009, Pf03143, Pf03144	1917	ENSG00000101210.10	EEF1A2	20	Legionellosis; RNA transport	Eukaryotic Translation Elongation	Translation Factors	6	0.657	0.397	0.387	0.219	0.144	0.419	0.364	0.821	204.2	134.1	81.1	78.9	44.8	29.4	85.5	74.3	167.7	3.45844e+07	2.27086e+07	1.37446e+07
High	Master Protein	Q2KIG3	TREMBL:Q2KIG3 (Bos taurus) Similar to carboxypeptidase B2	>Q2KIG3 TREMBL:Q2KIG3 (Bos taurus) Similar to carboxypeptidase B2	0	TRUE	42.732	18	8	9	55	8	423	48.8	8.56	54.3	8	coagulation;metabolic process;regulation of biological process	extracellular	catalytic activity;metal ion binding	Pf00246, Pf02244	508222	ENSBTAG00000007073.3	CPB2	12	Complement and coagulation cascades; Pancreatic secretion; Protein digestion and absorption	Regulation of Complement cascade	Complement and Coagulation Cascades	8	0.908	0.786	0.67	0.329	1.011	1.045	0.713	0.695	124.3	123.9	96.7	83.1	42	132.1	125.7	86.7	85.6	3.2461e+08	3.23644e+08	2.52566e+08
High	Master Protein	P04843	Dolichyl-diphosphooligosaccharide--protein glycosyltransferase subunit 1 [OS=Homo sapiens]	>ProteinCenter:SwissProt|P04843 Dolichyl-diphosphooligosaccharide--protein glycosyltransferase subunit 1 [OS=Homo sapiens]	0	FALSE	42.644	23	12	12	22	12	607	68.5	6.38	23.01	12	metabolic process	cytosol;endoplasmic reticulum;membrane	catalytic activity;protein binding;RNA binding	Pf04597	6184	ENSG00000163902.11	RPN1	3	Metabolic pathways; N-Glycan biosynthesis; Protein processing in endoplasmic reticulum	Asparagine N-linked glycosylation; SRP-dependent cotranslational protein targeting to membrane	Proteasome Degradation	9	0.835	1.059	15.162	22.482	1.864	1.6	6.162	4.132	8.9	8.2	18.6	271.2	309.6	18	32.6	150.3	82.5	3.71497e+06	3.41645e+06	7.80128e+06
High	Master Protein	Q6P1M3-1	Lethal(2) giant larvae protein homolog 2 [OS=Homo sapiens]	>ProteinCenter:SwissProt|Q6P1M3-1 Lethal(2) giant larvae protein homolog 2 [OS=Homo sapiens]	0	FALSE	42.583	16	13	13	33	13	1020	113.4	7.52	41.2	13	cell division;regulation of biological process;transport	cytoplasm;cytosol;membrane	enzyme regulator activity;protein binding	Pf08366	3993	ENSG00000073350.13	LLGL2	17	Hippo signaling pathway; Tight junction			2	0.645	0.698	1.416	2.364	1.404	0.577	0.72	0.915	110.7	103.1	137.5	87.3	160.2	89	66.2	75	71.1	9.79514e+07	9.11878e+07	1.21617e+08
High	Master Protein	P13797	Plastin-3 [OS=Homo sapiens]	>ProteinCenter:SwissProt|P13797 Plastin-3 [OS=Homo sapiens]	0	FALSE	42.215	24	13	14	31	6	630	70.8	5.6	31.81	13	cell organization and biogenesis	cytoplasm;cytosol;membrane	metal ion binding;protein binding	Pf00036, Pf00307, Pf13499	5358	ENSG00000102024.17	PLS3	X				0	0.562	0.566	2.243	5.484	2.121	2.288	4.391	4.059	43.7	25.2	22.3	78.1	187.3	78.9	102.5	177.1	185	1.48597e+07	8.5599e+06	7.58899e+06
High	Master Protein	P10301	Ras-related protein R-Ras [OS=Homo sapiens]	>ProteinCenter:SwissProt|P10301 Ras-related protein R-Ras [OS=Homo sapiens]	0	FALSE	42.09	64	12	12	35	10	218	23.5	6.93	41.91	12	cell differentiation;regulation of biological process;response to stimulus	membrane	catalytic activity;nucleotide binding;protein binding	Pf00071, Pf08477	6237	ENSG00000126458.3	RRAS	19	Rap1 signaling pathway; Ras signaling pathway; HTLV-I infection; Phospholipase D signaling pathway; Axon guidance; Proteoglycans in cancer; cAMP signaling pathway; Regulation of actin cytoskeleton; MAPK signaling pathway; Tight junction	Sema4D mediated inhibition of cell attachment and migration; SEMA3A-Plexin repulsion signaling by inhibiting Integrin adhesion; CREB phosphorylation through the activation of Ras	G Protein Signaling Pathways; Canonical and Non-canonical Notch signaling; MAPK and NFkB Signalling Pathways Inhibited by Yersinia YopJ; T-Cell antigen Receptor (TCR) pathway during Staphylococcus aureus infection; MAPK Cascade; Regulation of Actin Cytoskeleton	28	0.742	0.596	1.461	2.244	1.567	0.109	0.18	0.121	114.7	65.2	59.8	166.2	267	190.2	11.5	15.7	9.8	5.14849e+07	2.92839e+07	2.68447e+07
High	Master Protein	P16070	CD44 antigen [OS=Homo sapiens]	>ProteinCenter:SwissProt|P16070 CD44 antigen [OS=Homo sapiens]	0	FALSE	41.97	9	7	10	48	7	742	81.5	5.33	58.65	7	cell organization and biogenesis;cellular component movement;metabolic process;regulation of biological process;response to stimulus;transport	cell surface;cytosol;Golgi;membrane	protein binding;receptor activity;signal transducer activity	Pf00193	960	ENSG00000026508.17	CD44	11	Proteoglycans in cancer; MicroRNAs in cancer; ECM-receptor interaction; Epstein-Barr virus infection; Hematopoietic cell lineage; Shigellosis	Integrin cell surface interactions; Degradation of the extracellular matrix; Neutrophil degranulation; Hyaluronan uptake and degradation; Interferon gamma signaling; Cell surface interactions at the vascular wall	Hepatitis C and Hepatocellular Carcinoma; Wnt Signaling Pathway and Pluripotency; Senescence and Autophagy in Cancer	25	0.742	0.695	1.385	2.897	1.773	0.041	0.1	0.075	113.8	81.8	77.2	126.7	295.7	182.2	7.5	10	5.1	2.02749e+08	1.45716e+08	1.37435e+08
High	Master Protein	Q16891	MICOS complex subunit Mic60 [OS=Homo sapiens]	>ProteinCenter:SwissProt|Q16891 MICOS complex subunit Mic60 [OS=Homo sapiens]	0	FALSE	41.919	19	10	10	22	10	758	83.6	6.48	27.4	10	cell organization and biogenesis;cellular homeostasis	membrane;mitochondrion	protein binding;RNA binding	Pf09731	10989	ENSG00000132305.20	IMMT	2		Cristae formation		3	0.741	1.008	26.733	16.679	0.216	4.156	10.047	12.047	6.7	4.3	5.1	291.3	277.8	5	28.3	152.8	128.7	1.37006e+06	873195	1.04974e+06
High	Master Protein	Q06210-1	glutamine--fructose-6-phosphate aminotransferase [isomerizing] 1 [OS=Homo sapiens]	>ProteinCenter:SwissProt|Q06210-1 glutamine--fructose-6-phosphate aminotransferase [isomerizing] 1 [OS=Homo sapiens]	0	FALSE	41.72	21	12	12	34	12	699	78.8	7.11	38.61	12	metabolic process;regulation of biological process	cytosol	catalytic activity	Pf00310, Pf01380, Pf13230, Pf13522, Pf13537, Pf13580	2673	ENSG00000198380.12	GFPT1	2	Metabolic pathways; Alanine, aspartate and glutamate metabolism; Insulin resistance; Amino sugar and nucleotide sugar metabolism	XBP1(S) activates chaperone genes; Defective GFPT1 causes CMSTA1; Synthesis of UDP-N-acetyl-glucosamine		17	0.782	0.72	3.967	3.818	2.518	1.24	1.517	1.313	49.5	36.4	35.1	257.5	199.2	129.7	51.2	78.2	63.2	3.10835e+07	2.28894e+07	2.20358e+07
High	Master Protein	P42704	Leucine-rich PPR motif-containing protein, mitochondrial [OS=Homo sapiens]	>ProteinCenter:SwissProt|P42704 Leucine-rich PPR motif-containing protein, mitochondrial [OS=Homo sapiens]	0	FALSE	41.674	13	15	15	26	15	1394	157.8	6.13	22.69	15	cellular component movement;metabolic process;regulation of biological process;transport	chromosome;cytoplasm;cytoskeleton;membrane;mitochondrion;nucleus	catalytic activity;DNA binding;protein binding;RNA binding	Pf12854, Pf13041, Pf13812	10128	ENSG00000138095.18	LRPPRC	2		TP53 Regulates Metabolic Genes; Respiratory electron transport		9	1.238	1.783	25.546	14.911	1.054	2.068	9.334	9.583	7.9	11.8	14.5	325.7	250.2	8.5	21	138.8	121.5	2.56774e+06	3.81655e+06	4.68444e+06
High	Master Protein	Q15582	Transforming growth factor-beta-induced protein ig-h3 [OS=Homo sapiens]	>ProteinCenter:SwissProt|Q15582 Transforming growth factor-beta-induced protein ig-h3 [OS=Homo sapiens]	0	FALSE	41.542	20	11	11	28	11	683	74.6	7.71	25.87	11	cell differentiation;cell organization and biogenesis;cell proliferation;metabolic process;regulation of biological process;response to stimulus	extracellular;membrane	protein binding	Pf02469, Pf07546	7045	ENSG00000120708.16	TGFBI	5		Amyloid fiber formation		2	1.016	1.258	0.896	1.09	1.249	1.954	1.516	2.436	67.2	80	72.9	61.7	36.5	83	167.4	95.7	235.6	5.33234e+07	6.35228e+07	5.78182e+07
High	Master Protein	P30455	HLA class I histocompatibility antigen, A-36 alpha chain [OS=Homo sapiens]	>ProteinCenter:SwissProt|P30455 HLA class I histocompatibility antigen, A-36 alpha chain [OS=Homo sapiens]	0	FALSE	41.433	21	9	10	33	2	365	40.9	6.39	44.25	9	regulation of biological process;response to stimulus	cell surface;endoplasmic reticulum;Golgi;membrane	protein binding;RNA binding	Pf00129, Pf07654	3105		HLA-A	6		Interferon alpha/beta signaling; ER-Phagosome pathway; Immunoregulatory interactions between a Lymphoid and a non-Lymphoid cell; Endosomal/Vacuolar pathway; Interferon gamma signaling; Antigen Presentation: Folding, assembly and peptide loading of class I MHC	Proteasome Degradation; Allograft Rejection	14	0.659	0.68	0.213	0.158	0.077	0.01	0.01	0.01	325.9	214.9	222.1	33.7	61.4	41.9				2.63229e+07	1.73608e+07	1.7942e+07
High	Master Protein	Q9UNX3	60S ribosomal protein L26-like 1 [OS=Homo sapiens]	>ProteinCenter:SwissProt|Q9UNX3 60S ribosomal protein L26-like 1 [OS=Homo sapiens]	0	FALSE	41.431	45	11	12	39	1	145	17.2	10.55	44.69	11	metabolic process	ribosome	RNA binding;structural molecule activity	Pf00467	51121	ENSG00000037241.7	RPL26L1	5	Ribosome	Peptide chain elongation; Eukaryotic Translation Termination; Viral mRNA Translation; L13a-mediated translational silencing of Ceruloplasmin expression; Nonsense Mediated Decay (NMD) independent of the Exon Junction Complex (EJC); Selenocysteine synthesis; Nonsense Mediated Decay (NMD) enhanced by the Exon Junction Complex (EJC); GTP hydrolysis and joining of the 60S ribosomal subunit; Major path…		33		100					100				99.6					800.4				522089
High	Master Protein	P61981	14-3-3 protein gamma [OS=Homo sapiens]	>ProteinCenter:SwissProt|P61981 14-3-3 protein gamma [OS=Homo sapiens]	0	FALSE	41.428	40	11	13	34	6	247	28.3	4.89	37.56	11	cell organization and biogenesis;regulation of biological process;response to stimulus;transport	cytoplasm;cytosol;membrane;mitochondrion	enzyme regulator activity;protein binding;RNA binding	Pf00244	7532	ENSG00000170027.6	YWHAG	7	Oocyte meiosis; Epstein-Barr virus infection; Cell cycle; Hippo signaling pathway; Viral carcinogenesis; PI3K-Akt signaling pathway	Chk1/Chk2(Cds1) mediated inactivation of Cyclin B:Cdk1 complex; Regulation of PLK1 Activity at G2/M Transition; AURKA Activation by TPX2; Anchoring of the basal body to the plasma membrane; Recruitment of NuMA to mitotic centrosomes; Activation of BAD and translocation to mitochondria ; Recruitment of mitotic centrosome proteins and complexes; Loss of Nlp from mitotic centrosomes; Translocation o…	Cell Cycle; Prolactin Signaling Pathway; Myometrial Relaxation and Contraction Pathways; Calcium Regulation in the Cardiac Cell; Sudden Infant Death Syndrome (SIDS) Susceptibility Pathways	48	0.772	0.812	3.228	1.575	1.088	0.916	1.257	1.627	47.9	42.8	56.9	120.9	203.7	100	60.4	173.8	93.7	4.67838e+07	4.17186e+07	5.55296e+07
High	Master Protein	P31948	stress-induced-phosphoprotein 1 [OS=Homo sapiens]	>ProteinCenter:SwissProt|P31948 stress-induced-phosphoprotein 1 [OS=Homo sapiens]	0	FALSE	41.299	24	12	12	30	12	543	62.6	6.8	26.43	12	response to stimulus	cytoplasm;cytosol;Golgi;nucleus	protein binding;RNA binding	Pf00515, Pf12895, Pf13414, Pf13424, Pf13432	10963	ENSG00000168439.16	STIP1	11	Prion diseases	HSP90 chaperone cycle for steroid hormone receptors (SHR)		4	0.643	0.645	3.416	3.429	2.422	0.866	2.092	1.574	48.6	31.9	30.6	173.7	215.3	120	36.3	162.8	80.8	3.33016e+07	2.19019e+07	2.09965e+07
High	Master Protein	Q14152	Eukaryotic translation initiation factor 3 subunit A [OS=Homo sapiens]	>ProteinCenter:SwissProt|Q14152 Eukaryotic translation initiation factor 3 subunit A [OS=Homo sapiens]	0	FALSE	41.209	11	12	12	25	12	1382	166.5	6.79	24.75	12	cell organization and biogenesis;metabolic process;regulation of biological process	cytoplasm;cytosol;membrane;nucleus	protein binding;RNA binding;structural molecule activity	Pf01399	8661	ENSG00000107581.12	EIF3A	10	RNA transport	Formation of the ternary complex, and subsequently, the 43S complex; L13a-mediated translational silencing of Ceruloplasmin expression; Translation initiation complex formation; GTP hydrolysis and joining of the 60S ribosomal subunit; Formation of a pool of free 40S subunits; Ribosomal scanning and start codon recognition	Translation Factors	13	0.901	0.749	0.975	0.955	0.765	0.769	1.379	1.279	113.3	73.9	85.4	112.9	104.8	61.7	84.1	138.8	125	4.26946e+07	2.78596e+07	3.21742e+07
High	Master Protein	P62070	Ras-related protein R-Ras2 [OS=Homo sapiens]	>ProteinCenter:SwissProt|P62070 Ras-related protein R-Ras2 [OS=Homo sapiens]	0	FALSE	41.154	48	8	9	37	6	204	23.4	6.01	45	8	cell differentiation;regulation of biological process;response to stimulus	endoplasmic reticulum;membrane	catalytic activity;nucleotide binding;protein binding	Pf00071, Pf08477	22800	ENSG00000133818.13	RRAS2	11	Phospholipase D signaling pathway; Proteoglycans in cancer; Ras signaling pathway; MAPK signaling pathway; Tight junction; cAMP signaling pathway; Regulation of actin cytoskeleton; HTLV-I infection		Regulation of Actin Cytoskeleton	9	0.638	0.441	2.201	2.825	1.976	0.68	1.414	0.664	77.8	60.4	48.1	145.1	205.4	148.7	57.6	95.1	61.9	5.98628e+07	4.64466e+07	3.69572e+07
High	Master Protein	Q9ULV4	coronin-1C [OS=Homo sapiens]	>ProteinCenter:SwissProt|Q9ULV4 coronin-1C [OS=Homo sapiens]	0	FALSE	41.152	26	13	13	29	13	474	53.2	7.08	26.92	13	cell organization and biogenesis;cellular component movement;regulation of biological process;response to stimulus;transport	cytoplasm;cytoskeleton;membrane	protein binding	Pf00400, Pf08953, Pf08954	23603	ENSG00000110880.10	CORO1C	12				0	0.819	0.84	1.687	2.026	1.35	1.151	2.089	2.061	65.6	57.5	55.6	117	168.5	108.4	69	131.3	127	7.76369e+07	6.8118e+07	6.58197e+07
High	Master Protein	P23396	40S ribosomal protein S3 [OS=Homo sapiens]	>ProteinCenter:SwissProt|P23396 40S ribosomal protein S3 [OS=Homo sapiens]	0	FALSE	41.138	51	15	15	37	15	243	26.7	9.66	43.25	15	cell death;cell division;cell organization and biogenesis;metabolic process;regulation of biological process;response to stimulus;transport	cytoplasm;cytoskeleton;cytosol;endoplasmic reticulum;membrane;mitochondrion;nucleus;organelle lumen;ribosome	catalytic activity;DNA binding;protein binding;RNA binding;structural molecule activity	Pf00189, Pf07650	6188	ENSG00000149273.14	RPS3	11	Ribosome	Peptide chain elongation; Eukaryotic Translation Termination; Viral mRNA Translation; Formation of the ternary complex, and subsequently, the 43S complex; L13a-mediated translational silencing of Ceruloplasmin expression; Selenocysteine synthesis; Nonsense Mediated Decay (NMD) independent of the Exon Junction Complex (EJC); Nonsense Mediated Decay (NMD) enhanced by the Exon Junction Complex (EJC)…	Cytoplasmic Ribosomal Proteins	38	0.668	0.7	2.879	3.05	1.972	1.088	4.073	1.651	59.5	47.4	48.3	177.7	137.7	78	69.9	168.7	112.8	1.23492e+08	9.8519e+07	1.00312e+08
High	Master Protein	Q01650	large neutral amino acids transporter small subunit 1 [OS=Homo sapiens]	>ProteinCenter:SwissProt|Q01650 large neutral amino acids transporter small subunit 1 [OS=Homo sapiens]	0	FALSE	41.136	8	7	7	49	6	507	55	7.72	72.6	7	cell differentiation;cellular component movement;development;metabolic process;transport	cytoplasm;cytosol;membrane	protein binding;transporter activity	Pf00324, Pf13520	8140	ENSG00000103257.8	SLC7A5	16	Central carbon metabolism in cancer; mTOR signaling pathway	Tryptophan catabolism; Basigin interactions; Amino acid transport across the plasma membrane	Aryl Hydrocarbon Receptor Pathway	14	0.82	0.707	1.32	2.44	1.304	1.539	1.873	1.649	82.1	59.6	57.9	81	156.4	78.4	101.6	166.8	116.2	9.68896e+07	7.02939e+07	6.82706e+07
High	Master Protein	P12931	Proto-oncogene tyrosine-protein kinase Src [OS=Homo sapiens]	>ProteinCenter:SwissProt|P12931 Proto-oncogene tyrosine-protein kinase Src [OS=Homo sapiens]	0	FALSE	41.136	21	11	11	39	6	536	59.8	7.42	47.52	11	cell communication;cell organization and biogenesis;cell proliferation;cellular component movement;defense response;metabolic process;regulation of biological process;response to stimulus;transport	cytoplasm;cytoskeleton;cytosol;endosome;membrane;mitochondrion;nucleus;vacuole	catalytic activity;nucleotide binding;protein binding	Pf00017, Pf00018, Pf00069, Pf07653, Pf07714, Pf14604	6714	ENSG00000197122.11	SRC	20	Tuberculosis; Platelet activation; Rap1 signaling pathway; GnRH signaling pathway; Tight junction; GABAergic synapse; Focal adhesion; Thyroid hormone signaling pathway; Axon guidance; Prolactin signaling pathway; Inflammatory mediator regulation of TRP channels; Viral carcinogenesis; Regulation of actin cytoskeleton; Oxytocin signaling pathway; Epithelial cell signaling in Helicobacter pylori inf…	MET activates PTK2 signaling; Signal regulatory protein family interactions; CTLA4 inhibitory signaling; NCAM signaling for neurite out-growth; RUNX2 regulates osteoblast differentiation; FCGR activation; DCC mediated attractive signaling; Netrin mediated repulsion signals; Signaling by BRAF and RAF fusions; GRB2:SOS provides linkage to MAPK signaling for Integrins ; Signaling by RAS mutants; Sig…	Androgen receptor signaling pathway; Angiogenesis; Integrin-mediated Cell Adhesion; RANKL/RANK (Receptor activator of NFKB (ligand)) Signaling Pathway; Human Thyroid Stimulating Hormone (TSH) signaling pathway; Leptin signaling pathway; Follicle Stimulating Hormone (FSH) signaling pathway; Prolactin Signaling Pathway; Regulation of Microtubule Cytoskeleton; Signaling Pathways in Glioblastoma; AGE…	175	0.66	0.49	5.102	6.629	4.635	0.667	1.037	0.564	52	37	32.4	212.5	260.9	199.5	31	44.2	30.4	1.52194e+07	1.08344e+07	9.46281e+06
High	Master Protein	P22626	heterogeneous nuclear ribonucleoproteins A2/B1 [OS=Homo sapiens]	>ProteinCenter:SwissProt|P22626 heterogeneous nuclear ribonucleoproteins A2/B1 [OS=Homo sapiens]	0	FALSE	40.871	32	9	11	43	9	353	37.4	8.95	49.89	9	metabolic process;regulation of biological process;response to stimulus;transport	cytoplasm;extracellular;membrane;nucleus;spliceosomal complex	DNA binding;protein binding;RNA binding	Pf00076, Pf13893, Pf14259	3181	ENSG00000122566.20	HNRNPA2B1	7		Gene and protein expression by JAK-STAT signaling after Interleukin-12 stimulation; Interleukin-12 family signaling; mRNA Splicing - Major Pathway	mRNA Processing	10	1.028	1.283	17.446	9.606	1.476	7.147	20.852	16.144	12	11.6	16.1	181.5	108.9	17	83.9	250.7	218.3	9.54196e+06	9.1933e+06	1.27493e+07
High	Master Protein	Q12959	Disks large homolog 1 [OS=Homo sapiens]	>ProteinCenter:SwissProt|Q12959 Disks large homolog 1 [OS=Homo sapiens]	0	FALSE	40.702	21	13	13	40	12	904	100.4	5.76	38.94	13	cell communication;cell organization and biogenesis;cell proliferation;metabolic process;regulation of biological process;response to stimulus;transport	cytoplasm;cytosol;endoplasmic reticulum;Golgi;membrane;nucleus	catalytic activity;protein binding;structural molecule activity;transporter activity	Pf00018, Pf00595, Pf00625, Pf07653, Pf09058, Pf10600, Pf10608, Pf13180	1739	ENSG00000075711.20	DLG1	3	T cell receptor signaling pathway; Hippo signaling pathway; Viral carcinogenesis; HTLV-I infection	NrCAM interactions; Synaptic adhesion-like molecules; Activation of Ca-permeable Kainate Receptor; Trafficking of AMPA receptors	Brain-Derived Neurotrophic Factor (BDNF) signaling pathway; T-Cell antigen Receptor (TCR) pathway during Staphylococcus aureus infection	20	0.666	0.786	1.611	2.79	1.752	1.677	2.472	2.068	62.9	44.5	52.3	99	150.5	90.5	120.6	136.6	143.1	5.08746e+07	3.60368e+07	4.23004e+07
High	Master Protein	Q6P2Q9	Pre-mRNA-processing-splicing factor 8 [OS=Homo sapiens]	>ProteinCenter:SwissProt|Q6P2Q9 Pre-mRNA-processing-splicing factor 8 [OS=Homo sapiens]	0	FALSE	40.7	6	14	15	42	14	2335	273.4	8.84	49.97	14	cell organization and biogenesis;metabolic process;response to stimulus	membrane;nucleus;spliceosomal complex	catalytic activity;protein binding;RNA binding	Pf01398, Pf08082, Pf08083, Pf08084, Pf10596, Pf10597, Pf10598, Pf12134	10594	ENSG00000174231.16; ENSG00000274442.2	PRPF8	17; CHR_HSCHR17_1_CTG2	Spliceosome	mRNA Splicing - Major Pathway; mRNA Splicing - Minor Pathway	mRNA Processing	7	0.688	0.764	2.383	1.48	0.907	0.909	1.832	1.411	74.3	52.5	51.1	168.6	130.3	67.9	116.3	130.2	108.7	2.86134e+07	2.02074e+07	1.96713e+07
High	Master Protein	Q15019	septin-2 [OS=Homo sapiens]	>ProteinCenter:SwissProt|Q15019 septin-2 [OS=Homo sapiens]	0	FALSE	40.63	42	12	12	31	11	361	41.5	6.6	27.54	12	cell differentiation;cell division;cell organization and biogenesis;regulation of biological process;response to stimulus	chromosome;cytoplasm;cytoskeleton;cytosol;membrane;nucleus	nucleotide binding;protein binding	Pf00071, Pf00735, Pf01926	4735	ENSG00000168385.17	SEPT2	2	Bacterial invasion of epithelial cells	Anchoring of the basal body to the plasma membrane		4	0.851	1.131	1.691	2.026	1.714	1.164	1.493	1.787	82.5	76.8	117.8	80.1	98.9	73.6	100.5	79.9	189.9	6.90232e+07	6.42494e+07	9.856e+07
High	Master Protein	P61204	ADP-ribosylation factor 3 [OS=Homo sapiens]	>ProteinCenter:SwissProt|P61204 ADP-ribosylation factor 3 [OS=Homo sapiens]	0	FALSE	40.53	49	8	9	32	4	181	20.6	7.43	30.71	8	metabolic process;regulation of biological process;response to stimulus;transport	cytoplasm;Golgi;membrane	catalytic activity;nucleotide binding;protein binding;signal transducer activity	Pf00025, Pf00071, Pf00503, Pf01926, Pf04670, Pf08477, Pf09439	377	ENSG00000134287.9	ARF3	12	Endocytosis	Synthesis of PIPs at the Golgi membrane; COPI-dependent Golgi-to-ER retrograde traffic; COPI-mediated anterograde transport		17	0.57	0.222	2.413	4.307	3.073	0.413	0.946	0.417	73.8	41.4	22.3	167.7	293	215.8	28.2	37.5	20.4	7.26857e+07	4.0814e+07	2.20067e+07
High	Master Protein	Q86X29	Lipolysis-stimulated lipoprotein receptor [OS=Homo sapiens]	>ProteinCenter:SwissProt|Q86X29 Lipolysis-stimulated lipoprotein receptor [OS=Homo sapiens]	0	FALSE	40.401	19	9	10	46	1	649	71.4	7.97	62.99	9	regulation of biological process	membrane			51599	ENSG00000105699.16	LSR	19		VLDL clearance; LDL clearance		5	0.916	1.313	1.841	3.594	2.27	1.97	1.608	1.694	55.5	50.9	72.9	102.2	199.6	126	109.4	89.3	94.1	1.03996e+07	9.52641e+06	1.36504e+07
High	Master Protein	Q9H9H4	Vacuolar protein sorting-associated protein 37B [OS=Homo sapiens]	>ProteinCenter:SwissProt|Q9H9H4 Vacuolar protein sorting-associated protein 37B [OS=Homo sapiens]	0	FALSE	40.279	38	9	10	51	9	285	31.3	7.34	59.06	9	cell communication;cell organization and biogenesis;metabolic process;regulation of biological process;response to stimulus;transport	cytoplasm;endosome;membrane	protein binding	Pf07200	79720	ENSG00000139722.6	VPS37B	12	Endocytosis	Budding and maturation of HIV virion; Endosomal Sorting Complex Required For Transport (ESCRT); Membrane binding and targetting of GAG proteins		13	0.926	0.94	1.072	1.034	2.112	1.362	2.642	0.785	76.1	78.2	86	76.9	101.8	156.6	103.4	169	51.9	7.85485e+07	8.06684e+07	8.87459e+07
High	Master Protein	P61158	actin-related protein 3 [OS=Homo sapiens]	>ProteinCenter:SwissProt|P61158 actin-related protein 3 [OS=Homo sapiens]	0	FALSE	40.243	26	12	13	33	10	418	47.3	5.88	35.43	12	cell division;cell organization and biogenesis;cellular component movement;regulation of biological process;response to stimulus	cytoplasm;cytoskeleton;cytosol;membrane	nucleotide binding;protein binding;structural molecule activity	Pf00022	10096	ENSG00000115091.11	ACTR3	2		EPHB-mediated forward signaling; Clathrin-mediated endocytosis; RHO GTPases Activate WASPs and WAVEs; Regulation of actin dynamics for phagocytic cup formation	Association Between Physico-Chemical Features and Toxicity Associated Pathways	16	0.872	0.981	4.053	5.948	3.847	1.886	5.778	3.054	41	37.9	47.8	161.4	224	137.4	62.3	93.4	94.8	3.64716e+07	3.36719e+07	4.25048e+07
High	Master Protein	P06868	SWISS-PROT:P06868 (Bos taurus) Plasminogen precursor	>P06868 SWISS-PROT:P06868 (Bos taurus) Plasminogen precursor	0	TRUE	40.24	12	11	11	37	11	812	91.2	7.5	49.17	11	coagulation;metabolic process;regulation of biological process;response to stimulus	extracellular	catalytic activity;protein binding	Pf00024, Pf00051, Pf00089, Pf09342, Pf13365	280897		PLG	9	Influenza A; Neuroactive ligand-receptor interaction; Staphylococcus aureus infection; Complement and coagulation cascades			4	1.106	1.299	0.463	0.298	0.516	0.861	0.612	0.867	149.5	152.8	174.3	76.4	42	70.1	85.4	65.6	84	4.49632e+08	4.59587e+08	5.24221e+08
High	Master Protein	P63010-1	AP-2 complex subunit beta [OS=Homo sapiens]	>ProteinCenter:SwissProt|P63010-1 AP-2 complex subunit beta [OS=Homo sapiens]	0	FALSE	40.202	14	11	11	34	8	937	104.5	5.38	34.66	11	cell organization and biogenesis;cellular component movement;metabolic process;regulation of biological process;response to stimulus;transport	cytosol;membrane	protein binding;transporter activity	Pf01602, Pf02883, Pf09066, Pf12717, Pf13646	163	ENSG00000006125.17	AP2B1	17	Endocrine and other factor-regulated calcium reabsorption; Endocytosis; Synaptic vesicle cycle; Huntington's disease	Cargo recognition for clathrin-mediated endocytosis; Nef Mediated CD8 Down-regulation; Nef Mediated CD4 Down-regulation; Trafficking of GluR2-containing AMPA receptors; Recycling pathway of L1; LDL clearance; EPH-ephrin mediated repulsion of cells; Retrograde neurotrophin signalling; VLDLR internalisation and degradation; WNT5A-dependent internalization of FZD2, FZD5 and ROR2; MHC class II antige…	Synaptic Vesicle Pathway; EGF/EGFR Signaling Pathway	48	0.805	0.757	1.395	1.972	1.686	1.198	1.768	1.266	78.1	64.6	63.4	99.1	121.5	95.7	128.9	136.7	112	4.16891e+07	3.44856e+07	3.38262e+07
High	Master Protein	Q99959	Plakophilin-2 [OS=Homo sapiens]	>ProteinCenter:SwissProt|Q99959 Plakophilin-2 [OS=Homo sapiens]	0	FALSE	40.095	16	10	10	27	10	881	97.4	9.33	29.07	10	cell communication;cell death;cell organization and biogenesis;regulation of biological process	cytoskeleton;membrane;nucleus	protein binding;structural molecule activity		5318	ENSG00000057294.14	PKP2	12	Arrhythmogenic right ventricular cardiomyopathy (ARVC)	Formation of the cornified envelope	Arrhythmogenic Right Ventricular Cardiomyopathy	5	0.637	0.884	4.697	6.289	4.263	8.189	9.185	7.255	17.6	9	11.2	96.4	144.5	108.6	167.6	166.1	179.1	7.10206e+06	3.63954e+06	4.52772e+06
High	Master Protein	O75367-1	Core histone macro-H2A.1 [OS=Homo sapiens]	>ProteinCenter:SwissProt|O75367-1 Core histone macro-H2A.1 [OS=Homo sapiens]	0	FALSE	40.006	42	12	12	45	10	372	39.6	9.79	42.15	12	cell organization and biogenesis;regulation of biological process	chromosome;nucleus	DNA binding;enzyme regulator activity;protein binding	Pf00125, Pf01661	9555	ENSG00000113648.16	H2AFY	5	Alcoholism; Systemic lupus erythematosus		H19 action Rb-E2F1 signaling and CDK-beta-catenin activity	3	0.864	1.055	6.984	8.959	8.858	3.75	4.785	1.923	48.5	40.1	43.3	166.5	149	182.8	124.6	90.1	55	6.38329e+07	5.27924e+07	5.69044e+07
High	Master Protein	P27105	erythrocyte band 7 integral membrane protein [OS=Homo sapiens]	>ProteinCenter:SwissProt|P27105 erythrocyte band 7 integral membrane protein [OS=Homo sapiens]	0	FALSE	39.95	39	10	11	42	10	288	31.7	7.88	48.97	10	cell organization and biogenesis;regulation of biological process;transport	cytoplasm;cytoskeleton;cytosol;endoplasmic reticulum;membrane;mitochondrion	protein binding	Pf01145	2040	ENSG00000148175.12	STOM	9		Neutrophil degranulation; Stimuli-sensing channels		6	0.979	1.081	0.34	0.295	0.418	0.785	0.645	0.452	149.1	157.1	168.4	42.5	40.2	55.2	119.8	93.2	74.5	2.18843e+08	2.30636e+08	2.47136e+08
High	Master Protein	Q13884	Beta-1-syntrophin [OS=Homo sapiens]	>ProteinCenter:SwissProt|Q13884 Beta-1-syntrophin [OS=Homo sapiens]	0	FALSE	39.9	29	12	13	27	11	538	58	8.63	33.84	12		cytoplasm;cytoskeleton;membrane	protein binding;structural molecule activity	Pf00169, Pf00595	6641	ENSG00000172164.13	SNTB1	8				0	0.897	1.033	5.847	3.652	2.771	4.701	2.95	4.184	19.8	18	21.2	134.7	139.8	105.4	174.7	133.2	153.2	7.54181e+06	6.86416e+06	8.06774e+06
High	Master Protein	sp P15559-1	NAD(P)H dehydrogenase [quinone] 1 [OS=Homo sapiens]	>sp|NQO1_HUMAN| >ProteinCenter:SwissProt|P15559-1 NAD(P)H dehydrogenase [quinone] 1 [OS=Homo sapiens]	0	TRUE	39.874	37	11	11	39	11	274	30.8	8.88	33.57	11												0	0.701	0.706	14.595	11.686	5.648	1.673	4.052	3.66	21.9	15.8	20.8	285.3	223.6	113.7	45.5	78.4	95.1	4.79395e+07	3.46269e+07	4.56888e+07
High	Master Protein	Q99623	Prohibitin-2 [OS=Homo sapiens]	>ProteinCenter:SwissProt|Q99623 Prohibitin-2 [OS=Homo sapiens]	0	FALSE	39.825	32	9	10	23	9	299	33.3	9.83	19.28	9	cell organization and biogenesis;metabolic process;regulation of biological process;response to stimulus;transport	cell surface;cytoplasm;membrane;mitochondrion;nucleus	protein binding	Pf01145	11331	ENSG00000215021.8	PHB2	12		Processing of SMDT1		3	0.995	0.967	12.584	14.789	0.525	1.827	12.462	8.276	11	14.2	21.4	234.2	266.4	5.7	20.2	191.9	134.9	5.89313e+06	7.61242e+06	1.1482e+07
High	Master Protein	Q8N5I2	arrestin domain-containing protein 1 [OS=Homo sapiens]	>ProteinCenter:SwissProt|Q8N5I2 arrestin domain-containing protein 1 [OS=Homo sapiens]	0	FALSE	39.755	31	11	11	65	11	433	46	7.02	58.51	11	metabolic process;regulation of biological process;transport	membrane	protein binding	Pf00339, Pf02752, Pf03643	92714	ENSG00000197070.13	ARRDC1	9				0	0.689	0.669	0.862	0.869	1.227	0.267	0.487	0.135	164.3	119.8	128.5	103.9	92.2	164.4	45.5	59.5	22	7.63317e+08	5.5653e+08	5.97103e+08
High	Master Protein	Q7Z6Z7	E3 ubiquitin-protein ligase HUWE1 [OS=Homo sapiens]	>ProteinCenter:SwissProt|Q7Z6Z7 E3 ubiquitin-protein ligase HUWE1 [OS=Homo sapiens]	0	FALSE	39.706	4	14	14	22	14	4374	481.6	5.22	20.95	14	cell differentiation;cell organization and biogenesis;metabolic process;response to stimulus;transport	cytoplasm;cytosol;extracellular;membrane;nucleus;organelle lumen	catalytic activity;DNA binding;protein binding;RNA binding	Pf00632, Pf02825, Pf06012, Pf06025, Pf14377	10075	ENSG00000086758.15	HUWE1	X	Ubiquitin mediated proteolysis	Neutrophil degranulation; Antigen processing: Ubiquitination & Proteasome degradation		7	0.971	0.859	2.502	1.677	1.11	1.708	2.33	2.515	60	47.6	41.9	152	112.7	85.5	104.9	147.3	148	1.32585e+07	1.05221e+07	9.24792e+06
High	Master Protein	Q86X29-3	Isoform 3 of Lipolysis-stimulated lipoprotein receptor [OS=Homo sapiens]	>ProteinCenter:SwissProt|Q86X29-3 Isoform 3 of Lipolysis-stimulated lipoprotein receptor [OS=Homo sapiens]	0	FALSE	39.679	19	9	10	41	1	629	69.4	8.15	55.6	9	regulation of biological process	membrane			51599	ENSG00000105699.16	LSR	19				0	0.865	1.517	2.218	3.14	2.447	2.067	2.05	1.777	52.7	45.6	79.9	116.9	165.4	128.9	108.9	108	93.6	3.12547e+06	2.70405e+06	4.73997e+06
High	Master Protein	Q16181	Septin-7 [OS=Homo sapiens]	>ProteinCenter:SwissProt|Q16181 Septin-7 [OS=Homo sapiens]	0	FALSE	39.643	32	11	12	26	9	437	50.6	8.63	22.61	11	cell differentiation;cell division;cell organization and biogenesis;regulation of biological process	chromosome;cytoplasm;cytoskeleton;cytosol;membrane;nucleus	nucleotide binding;protein binding;structural molecule activity	Pf00735, Pf01926, Pf10211	989		SEPT7	7		MAPK6/MAPK4 signaling		3	0.662	0.493	1.756	3.595	2.629	0.709	2.403	1.121	66.4	49.4	52.7	104.5	188.7	156.5	51.7	137.5	92.4	2.13852e+07	1.59199e+07	1.69887e+07
High	Master Protein	P35900 P35900	SWISS-PROT:P35900 Tax_Id=9606 Gene_Symbol=KRT20 Keratin, type I cytoskeletal 20 Keratin, type I cytoskeletal 20 [OS=Homo sapiens]	>P35900 SWISS-PROT:P35900 Tax_Id=9606 Gene_Symbol=KRT20 Keratin, type I cytoskeletal 20 >ProteinCenter:SwissProt|P35900 Keratin, type I cytoskeletal 20 [OS=Homo sapiens]	0	TRUE	39.59	31	12	13	22	10	424	48.5	5.69	23.51	12	cell death;cell organization and biogenesis;regulation of biological process;response to stimulus	cytoplasm;cytosol	protein binding;structural molecule activity	Pf00038	54474	ENSG00000171431.3; ENSG00000263057.2	KRT20	17; CHR_HSCHR17_4_CTG4		Formation of the cornified envelope		3	1.71	2.222	7.691	4.835	0.717	1.02	0.01	2.699	13.6	21.7	27.4	494.3	229.9	37.7	14.3		61.1	5.05231e+06	8.03358e+06	1.01337e+07
High	Master Protein	P54886	delta-1-pyrroline-5-carboxylate synthase [OS=Homo sapiens]	>ProteinCenter:SwissProt|P54886 delta-1-pyrroline-5-carboxylate synthase [OS=Homo sapiens]	0	FALSE	39.546	19	12	12	19	12	795	87.2	7.12	24.58	12	metabolic process	cytoplasm;cytosol;membrane;mitochondrion	catalytic activity;nucleotide binding;protein binding;RNA binding	Pf00171, Pf00696	5832	ENSG00000059573.8	ALDH18A1	10	Metabolic pathways; Arginine and proline metabolism; Biosynthesis of amino acids	Amino acid synthesis and interconversion (transamination)	Amino Acid metabolism; Urea cycle and metabolism of amino groups	8	0.715	1.547	38.999	38.479	2.378	0.813	6.712	8.964	3.5	4.3	11.4	359.9	315.2	6.8	7.3	98.4	93.4	760014	938912	2.51491e+06
High	Master Protein	P13667	Protein disulfide-isomerase A4 [OS=Homo sapiens]	>ProteinCenter:SwissProt|P13667 Protein disulfide-isomerase A4 [OS=Homo sapiens]	0	FALSE	39.459	21	12	13	25	12	645	72.9	5.07	26.33	12	cellular homeostasis;metabolic process;regulation of biological process;response to stimulus;transport	cell surface;endoplasmic reticulum;organelle lumen	catalytic activity;metal ion binding;protein binding;RNA binding	Pf00085, Pf01216, Pf13098, Pf13848, Pf13905	9601	ENSG00000155660.10	PDIA4	7	Vibrio cholerae infection; Thyroid hormone synthesis; Protein processing in endoplasmic reticulum			3	0.768	1.071	9.968	13.527	1.674	1.941	6.331	4.934	20	16.3	22.5	225.3	301.2	30.4	40.1	141.8	102.4	1.3451e+07	1.09324e+07	1.51407e+07
High	Master Protein	P08779 P08779	SWISS-PROT:P08779 Tax_Id=9606 Gene_Symbol=KRT16 Keratin, type I cytoskeletal 16 Keratin, type I cytoskeletal 16 [OS=Homo sapiens]	>P08779 SWISS-PROT:P08779 Tax_Id=9606 Gene_Symbol=KRT16 Keratin, type I cytoskeletal 16 >ProteinCenter:SwissProt|P08779 Keratin, type I cytoskeletal 16 [OS=Homo sapiens]	0	TRUE	39.432	21	10	13	45	4	473	51.2	5.05	48.21	10	cell death;cell differentiation;cell organization and biogenesis;cell proliferation;cellular component movement;defense response;regulation of biological process;response to stimulus	cytoskeleton;cytosol;nucleus	protein binding;structural molecule activity	Pf00038, Pf07888, Pf13514	3868	ENSG00000186832.8	KRT16	17		Formation of the cornified envelope		3	100	100	100	100	100		100	100		102.9	206.3	166.8	149.2	19.8		118.4	136.6		8.36907e+06	1.67681e+07
High	Master Protein	P62826	GTP-binding nuclear protein RAN [OS=Homo sapiens]	>ProteinCenter:SwissProt|P62826 GTP-binding nuclear protein RAN [OS=Homo sapiens]	0	FALSE	39.197	40	8	8	43	8	216	24.4	7.49	37.32	8	cell division;cell organization and biogenesis;metabolic process;regulation of biological process;response to stimulus;transport	chromosome;cytoplasm;cytosol;endosome;membrane;nucleus	catalytic activity;metal ion binding;nucleotide binding;protein binding;RNA binding;transporter activity	Pf00025, Pf00071, Pf08477	5901	ENSG00000132341.11	RAN	12	RNA transport; Ribosome biogenesis in eukaryotes; HTLV-I infection; Epstein-Barr virus infection	MicroRNA (miRNA) biogenesis; Rev-mediated nuclear export of HIV RNA; Nuclear import of Rev protein; Regulation of cholesterol biosynthesis by SREBP (SREBF); NEP/NS2 Interacts with the Cellular Export Machinery; tRNA processing in the nucleus; Transcriptional regulation by small RNAs	Androgen receptor signaling pathway; miRNA Biogenesis	30	1.071	1.068	1.236	0.836	1.025	1.063	0.83	0.818	93.5	94.1	102.4	116.9	85.3	97.8	97.8	109.6	102.6	4.70918e+08	4.74291e+08	5.16094e+08
High	Master Protein	P53618	Coatomer subunit beta [OS=Homo sapiens]	>ProteinCenter:SwissProt|P53618 Coatomer subunit beta [OS=Homo sapiens]	0	FALSE	39.184	18	12	13	27	12	953	107.1	6.05	22.62	12	transport	cytoplasm;cytosol;Golgi;membrane	protein binding;structural molecule activity	Pf01602, Pf07718, Pf14806	1315	ENSG00000129083.12	COPB1	11		COPI-dependent Golgi-to-ER retrograde traffic; Neutrophil degranulation; COPI-mediated anterograde transport		14	0.696	0.551	4.18	3.387	2.571	1.013	1.068	1.067	86.2	61.7	60	193.9	154.7	132.9	60.1	87.8	62.7	2.68113e+07	1.91991e+07	1.86456e+07
High	Master Protein	P28800	SWISS-PROT:P28800 (Bos taurus) Alpha-2-antiplasmin precursor	>P28800 SWISS-PROT:P28800 (Bos taurus) Alpha-2-antiplasmin precursor	0	TRUE	39.175	23	10	12	53	10	492	54.7	5.72	51.08	10	cell organization and biogenesis;defense response;regulation of biological process;response to stimulus	cell surface;extracellular	enzyme regulator activity;protein binding	Pf00079	282522	ENSBTAG00000020859.3	SERPINF2	19	Complement and coagulation cascades	Dissolution of Fibrin Clot; Platelet degranulation	Complement and Coagulation Cascades; Blood Clotting Cascade	8	1.218	1.092	0.587	0.67	1.57	0.974	0.716	0.677	159.7	126.8	107.8	61.2	53.2	111.5	98	103.8	78	5.20309e+08	4.12921e+08	3.51256e+08
High	Master Protein	Q08211	Atp-dependent rna helicase a [OS=Homo sapiens]	>ProteinCenter:SwissProt|Q08211 Atp-dependent rna helicase a [OS=Homo sapiens]	0	FALSE	39.162	10	11	11	16	11	1270	140.9	6.84	18.64	11	cell death;cell differentiation;cell organization and biogenesis;defense response;metabolic process;regulation of biological process;response to stimulus;transport	cytoplasm;cytoskeleton;cytosol;membrane;nucleus;ribosome	catalytic activity;DNA binding;metal ion binding;nucleotide binding;protein binding;RNA binding	Pf00035, Pf00270, Pf00271, Pf04408, Pf07717	1660	ENSG00000135829.16	DHX9	1		TRAF6 mediated NF-kB activation; TAK1 activates NFkB by phosphorylation and activation of IKKs complex; RIP-mediated NFkB activation via ZBP1; Activated TLR4 signalling; Interleukin-1 family signaling; mRNA Splicing - Major Pathway; DEx/H-box helicases activate type I IFN and inflammatory cytokines production	mRNA Processing	34	0.692	0.735	6.322	2.592	1.132	0.87	1.407	1.341	61	28.2	59.8	390.4	129.9	79.7	24.5	84.8	41.6	1.32367e+07	6.12349e+06	1.29682e+07
High	Master Protein	sp		>sp|GSTP1_HUMAN|	0	TRUE	39.074	36	6	10	49	1	209	23.2	5.64	27.64	6												0	0.589	0.76	4.714	5.404	3.324	1.28	1.614	2.562	42.4	25	32.2	199.7	228.9	140.8	54.2	68.4	108.5	4.89708e+07	2.88454e+07	3.72235e+07
High	Master Protein	Q16658	Fascin [OS=Homo sapiens]	>ProteinCenter:SwissProt|Q16658 Fascin [OS=Homo sapiens]	0	FALSE	39.033	24	11	11	34	11	493	54.5	7.24	36.41	11	cell organization and biogenesis;cell proliferation;cellular component movement;regulation of biological process	cytoplasm;cytoskeleton;cytosol	protein binding;RNA binding	Pf06268	6624	ENSG00000075618.17	FSCN1	7	MicroRNAs in cancer	Interleukin-4 and 13 signaling		5	0.531	0.452	0.089	0.073	0.128	0.43	1.203	0.746	162.7	95.4	98.3	6.4	5.1	10.8	86.3	289.9	145.2	2.08357e+08	1.22167e+08	1.25833e+08
High	Master Protein	Q8WV92	MIT domain-containing protein 1 [OS=Homo sapiens]	>ProteinCenter:SwissProt|Q8WV92 MIT domain-containing protein 1 [OS=Homo sapiens]	0	FALSE	39.013	39	9	9	27	9	249	29.3	8	31.32	9	cell division;cell organization and biogenesis;transport	endosome;membrane	protein binding	Pf04212	129531	ENSG00000158411.11	MITD1	2				0	0.8	0.759	3.144	5.017	5.057	12.164	6.693	5.294	24.5	26.8	29.8	60.1	81.5	58.6	318.2	126.3	174.2	1.7422e+07	1.90887e+07	2.11932e+07
High	Master Protein	P60660	Myosin light polypeptide 6 [OS=Homo sapiens]	>ProteinCenter:SwissProt|P60660 Myosin light polypeptide 6 [OS=Homo sapiens]	0	FALSE	38.994	58	8	11	37	8	151	16.9	4.65	45.24	8	cellular component movement	cytosol;membrane	catalytic activity;metal ion binding;motor activity;protein binding;structural molecule activity	Pf00036, Pf13405, Pf13499	4637	ENSG00000092841.18	MYL6	12	Oxytocin signaling pathway; Vascular smooth muscle contraction	RHO GTPases activate PAKs; EPHA-mediated growth cone collapse; RHO GTPases Activate ROCKs; Sema4D induced cell migration and growth-cone collapse; Smooth Muscle Contraction; RHO GTPases activate CIT; RHO GTPases activate PKNs	Focal Adhesion	19	0.713	0.525	3.329	5.796	3.915	1.409	2.292	1.902	48.8	37.3	39.2	138.1	206.1	136.2	70.9	99.1	124.2	2.15501e+08	1.64576e+08	1.72963e+08
High	Master Protein	P61586	Transforming protein RhoA [OS=Homo sapiens]	>ProteinCenter:SwissProt|P61586 Transforming protein RhoA [OS=Homo sapiens]	0	FALSE	38.923	29	7	9	48	4	193	21.8	6.1	58.47	7	cell differentiation;cell division;cell organization and biogenesis;cellular component movement;metabolic process;regulation of biological process;response to stimulus;transport	cytoplasm;cytoskeleton;cytosol;endosome;membrane	catalytic activity;nucleotide binding;protein binding	Pf00025, Pf00071, Pf08477	387	ENSG00000067560.10	RHOA	3	MicroRNAs in cancer; Pancreatic secretion; Chemokine signaling pathway; Tight junction; Pathways in cancer; Sphingolipid signaling pathway; TGF-beta signaling pathway; Rap1 signaling pathway; Adherens junction; Phospholipase D signaling pathway; Focal adhesion; cAMP signaling pathway; Vascular smooth muscle contraction; Pertussis; Ras signaling pathway; T cell receptor signaling pathway; Colorect…	Rho GTPase cycle; Ovarian tumor domain proteases; G beta:gamma signalling through PI3Kgamma; RHO GTPases activate CIT; PCP/CE pathway; PI3K/AKT activation; SLIT2:ROBO1 increases RHOA activity; EPHA-mediated growth cone collapse; EPHB-mediated forward signaling; ERBB2 Regulates Cell Motility; Neutrophil degranulation; TGF-beta receptor signaling in EMT (epithelial to mesenchymal transition); Sema4…	Androgen receptor signaling pathway; Physiological and Pathological Hypertrophy of the Heart; MicroRNAs in cardiomyocyte hypertrophy; Leptin signaling pathway; Pathogenic Escherichia coli infection; AGE/RAGE pathway; Corticotropin-releasing hormone signaling pathway; Spinal Cord Injury; Alpha 6 Beta 4 signaling pathway; Focal Adhesion; G Protein Signaling Pathways; Wnt Signaling Pathway Netpath; …	111	0.94	0.856	0.352	1.018	0.101	1.515	0.356	1.589	92.7	86.5	87.8	49	78.4	44.6	137	173.3	150.6	9.3281e+07	8.69569e+07	8.82614e+07
High	Master Protein	Q96FQ6	Protein S100-A16 [OS=Homo sapiens]	>ProteinCenter:SwissProt|Q96FQ6 Protein S100-A16 [OS=Homo sapiens]	0	FALSE	38.918	50	6	8	42	6	103	11.8	6.79	43.44	6	response to stimulus	cytoplasm;cytosol;membrane;nucleus	metal ion binding;protein binding;RNA binding	Pf01023, Pf13202, Pf13499, Pf13833	140576	ENSG00000188643.10	S100A16	1				0	0.593	0.735	2.71	3.818	4.576	0.673	2.082	1.021	47.1	34.5	40.7	161.7	226	198.5	32.1	104.6	54.8	5.43795e+07	3.98784e+07	4.69812e+07
High	Master Protein	P50454	Serpin H1 [OS=Homo sapiens]	>ProteinCenter:SwissProt|P50454 Serpin H1 [OS=Homo sapiens]	0	FALSE	38.874	33	11	11	24	11	418	46.4	8.69	21.45	11	cell organization and biogenesis;metabolic process;regulation of biological process;response to stimulus	cytoplasm;endoplasmic reticulum;membrane;organelle lumen	enzyme regulator activity;protein binding;RNA binding	Pf00079	871	ENSG00000149257.13	SERPINH1	11		Collagen biosynthesis and modifying enzymes	Endochondral Ossification	4	0.69	0.541	4.62	4.641	0.95	1.02	3.159	1.853	53.9	41.7	36	184.6	168.9	54.9	95.1	157.2	107.8	2.22097e+07	1.71686e+07	1.48189e+07
High	Master Protein	P26640	Valine--tRNA ligase [OS=Homo sapiens]	>ProteinCenter:SwissProt|P26640 Valine--tRNA ligase [OS=Homo sapiens]	0	FALSE	38.809	12	10	10	31	10	1264	140.4	7.59	28.02	10	metabolic process;regulation of biological process	cytoplasm;cytosol;mitochondrion	catalytic activity;nucleotide binding;protein binding	Pf00043, Pf00133, Pf08264, Pf09334, Pf13603	7407; 57176	ENSG00000096171.14; ENSG00000204394.12; ENSG00000226589.9	VARS; VARS2	6; CHR_HSCHR6_MHC_DBB_CTG1; CHR_HSCHR6_MHC_COX_CTG1	Aminoacyl-tRNA biosynthesis	Cytosolic tRNA aminoacylation	Amino Acid metabolism	6	0.77	0.841	1.629	1.176	0.645	0.703	0.881	1.068	102.7	75.2	76.7	184.9	115.8	72.2	68	91.5	112.9	3.50598e+07	2.56767e+07	2.62037e+07
High	Master Protein	P12268	inosine-5'-monophosphate dehydrogenase 2 [OS=Homo sapiens]	>ProteinCenter:SwissProt|P12268 inosine-5'-monophosphate dehydrogenase 2 [OS=Homo sapiens]	0	FALSE	38.741	30	13	13	31	11	514	55.8	6.9	40.21	13	cell organization and biogenesis;cell proliferation;metabolic process;response to stimulus;transport	cytoplasm;cytosol;extracellular;membrane;nucleus;organelle lumen	catalytic activity;DNA binding;metal ion binding;nucleotide binding;protein binding;RNA binding	Pf00478, Pf00571, Pf00977, Pf01070, Pf03060	3615	ENSG00000178035.11	IMPDH2	3	Metabolic pathways; Drug metabolism - other enzymes; Purine metabolism	Neutrophil degranulation; Purine ribonucleoside monophosphate biosynthesis		10	0.822	0.804	1.665	1.184	0.623	1.076	2.105	1.627	85.9	69.5	74.6	126.9	97.2	47.9	95.6	150.2	152.2	8.16735e+07	6.61219e+07	7.09706e+07
High	Master Protein	Q9H4G0-2	Isoform 2 of Band 4.1-like protein 1 [OS=Homo sapiens]	>ProteinCenter:SwissProt|Q9H4G0-2 Isoform 2 of Band 4.1-like protein 1 [OS=Homo sapiens]	0	FALSE	38.642	15	11	11	26	1	779	87.6	5.92	35.5	11	cell organization and biogenesis	cytoskeleton;cytosol;membrane	protein binding;structural molecule activity	Pf00373, Pf04382, Pf05902, Pf08736, Pf09379, Pf09380	2036	ENSG00000088367.21	EPB41L1	20				0	0.01	0.624	4.627	7.133	4.789	0.01	0.547	1.197	45.2		28.2	209.1	322.3	216.4		24.7	54.1	854538		533480
High	Master Protein	P13647 P13647	SWISS-PROT:P13647 Tax_Id=9606 Gene_Symbol=KRT5 Keratin, type II cytoskeletal 5 keratin, type II cytoskeletal 5 [OS=Homo sapiens]	>P13647 SWISS-PROT:P13647 Tax_Id=9606 Gene_Symbol=KRT5 Keratin, type II cytoskeletal 5 >ProteinCenter:SwissProt|P13647 keratin, type II cytoskeletal 5 [OS=Homo sapiens]	0	TRUE	38.493	19	12	12	37	5	590	62.3	7.74	50.9	12	cell death;cell organization and biogenesis;metabolic process	cytoplasm;cytosol;membrane;mitochondrion;nucleus	catalytic activity;motor activity;protein binding;structural molecule activity	Pf00038, Pf01576, Pf02994, Pf03961, Pf04111, Pf05957, Pf12128	3852	ENSG00000186081.11	KRT5	12		Formation of the cornified envelope; Type I hemidesmosome assembly		6	1.748	8.758	3.219	3.979	4.514	8.611	3.782	11.749	10.8	39	239.1	59.5	67	67.9	148.5	53.7	214.4	2.8206e+06	1.02394e+07	6.27145e+07
High	Master Protein	P54760	Ephrin type-B receptor 4 [OS=Homo sapiens]	>ProteinCenter:SwissProt|P54760 Ephrin type-B receptor 4 [OS=Homo sapiens]	0	FALSE	38.453	16	12	12	25	8	987	108.2	6.9	20.93	12	cellular component movement;development;metabolic process;regulation of biological process;response to stimulus	cytosol;extracellular;membrane	catalytic activity;nucleotide binding;protein binding;receptor activity;signal transducer activity	Pf00041, Pf00069, Pf00536, Pf01404, Pf07647, Pf07699, Pf07714, Pf14575	2050	ENSG00000196411.9	EPHB4	7	Axon guidance	EPH-ephrin mediated repulsion of cells; Ephrin signaling; EPHB-mediated forward signaling		7	0.792	0.945	3.552	4.192	4.166	0.36	0.365	0.194	44.2	33.6	37	220.4	283.5	247.5	9	15.7	9.1	1.15076e+07	8.7483e+06	9.63762e+06
High	Master Protein	Q99569	Plakophilin-4 [OS=Homo sapiens]	>ProteinCenter:SwissProt|Q99569 Plakophilin-4 [OS=Homo sapiens]	0	FALSE	38.336	11	12	13	29	12	1192	131.8	8.94	26.8	12	cell communication;cell death;cell organization and biogenesis;regulation of biological process	cytoplasm;cytoskeleton;membrane	protein binding	Pf00514, Pf13646	8502	ENSG00000144283.21	PKP4	2		Formation of the cornified envelope		3	0.867	0.942	6.598	6.517	4.267	1.941	1.779	1.175	72.3	82.1	68.6	157.7	144.5	136.3	74.6	73.8	90	3.55438e+07	4.03428e+07	3.37143e+07
High	Master Protein	P61313-1	60S ribosomal protein L15 [OS=Homo sapiens]	>ProteinCenter:SwissProt|P61313-1 60S ribosomal protein L15 [OS=Homo sapiens]	0	FALSE	38.236	27	7	8	43	7	204	24.1	11.62	47.72	7	cell organization and biogenesis;metabolic process;response to stimulus;transport	cytosol;membrane;nucleus;ribosome	protein binding;RNA binding;structural molecule activity	Pf00827	6138	ENSG00000174748.18	RPL15	3	Ribosome	Peptide chain elongation; Eukaryotic Translation Termination; Viral mRNA Translation; L13a-mediated translational silencing of Ceruloplasmin expression; Nonsense Mediated Decay (NMD) independent of the Exon Junction Complex (EJC); Selenocysteine synthesis; Nonsense Mediated Decay (NMD) enhanced by the Exon Junction Complex (EJC); GTP hydrolysis and joining of the 60S ribosomal subunit; Major path…	Cytoplasmic Ribosomal Proteins	34	0.839	0.973	1.196	0.959	0.518	1.048	0.931	1.229	96.9	81.3	96.2	123.9	107.2	58.7	104.3	105.9	125.6	2.38538e+08	2.00099e+08	2.36955e+08
High	Master Protein	Q8WWI5	choline transporter-like protein 1 [OS=Homo sapiens]	>ProteinCenter:SwissProt|Q8WWI5 choline transporter-like protein 1 [OS=Homo sapiens]	0	FALSE	38.179	14	9	10	22	9	657	73.3	8.6	17.78	9	metabolic process;transport	membrane;mitochondrion	transporter activity	Pf04515	23446	ENSG00000070214.15	SLC44A1	9	Choline metabolism in cancer	Synthesis of PC; Choline catabolism; Transport of bile salts and organic acids, metal ions and amine compounds		11	0.739	0.58	1.491	1.966	1.861	0.642	1.053	0.408	102	78.9	70.6	138.6	179.7	166.6	64.6	60.3	38.9	7.32708e+07	5.66854e+07	5.06952e+07
High	Master Protein	P00352	Retinal dehydrogenase 1 [OS=Homo sapiens]	>ProteinCenter:SwissProt|P00352 Retinal dehydrogenase 1 [OS=Homo sapiens]	0	FALSE	38.133	24	10	10	30	9	501	54.8	6.73	31.41	10	metabolic process;regulation of biological process	cytoplasm;cytosol	catalytic activity;enzyme regulator activity;nucleotide binding	Pf00171, Pf05893, Pf07368	216	ENSG00000165092.12	ALDH1A1	9	Metabolic pathways; Retinol metabolism	Ethanol oxidation; Fructose catabolism; RA biosynthesis pathway	Folate-Alcohol and Cancer Pathway; Fatty Acid Omega Oxidation; Dopaminergic Neurogenesis; Amino Acid metabolism; Tryptophan metabolism; Vitamin A and Carotenoid Metabolism	19	1.125	1.322	5.837	4.912	2.937	0.936	0.322	0.663	25.1	27.8	30.4	279.5	320	168.5	22.8	9.6	16.3	1.80721e+07	2.00605e+07	2.18893e+07
High	Master Protein	Q14651	Plastin-1 [OS=Homo sapiens]	>ProteinCenter:SwissProt|Q14651 Plastin-1 [OS=Homo sapiens]	0	FALSE	37.966	21	11	11	28	7	629	70.2	5.41	42.81	11	cell organization and biogenesis;regulation of biological process;transport	cytoplasm;cytoskeleton	metal ion binding;protein binding;structural molecule activity	Pf00036, Pf00307, Pf13202, Pf13405, Pf13499, Pf13833	5357	ENSG00000120756.12	PLS1	3				0	0.502	0.255	2.488	2.918	2.138	1.359	1.426	1.733	34.8	26.8	10.9	163.6	243.8	146.1	56.3	123.1	94.7	4.70409e+06	3.62343e+06	1.46889e+06
High	Master Protein	P50395-1	Rab GDP dissociation inhibitor beta [OS=Homo sapiens]	>ProteinCenter:SwissProt|P50395-1 Rab GDP dissociation inhibitor beta [OS=Homo sapiens]	0	FALSE	37.799	36	14	14	29	10	445	50.6	6.47	23.54	14	metabolic process;regulation of biological process;response to stimulus;transport	cytoplasm;cytosol;extracellular;membrane;organelle lumen	catalytic activity;enzyme regulator activity;protein binding;RNA binding	Pf00996	2665	ENSG00000057608.16	GDI2	10		Neutrophil degranulation; RAB GEFs exchange GTP for GDP on RABs; Rho GTPase cycle		10	0.637	0.661	5.683	8.54	6.837	1.436	3.622	2.61	44.5	27.6	34.8	97.9	266.3	127.6	66.4	103.6	131.4	3.47688e+07	2.15414e+07	2.71849e+07
High	Master Protein	P23634-1	Plasma membrane calcium-transporting ATPase 4 [OS=Homo sapiens]	>ProteinCenter:SwissProt|P23634-1 Plasma membrane calcium-transporting ATPase 4 [OS=Homo sapiens]	0	FALSE	37.723	10	10	11	28	3	1241	137.8	6.6	26.48	10	cellular component movement;cellular homeostasis;regulation of biological process;response to stimulus;transport	membrane	catalytic activity;enzyme regulator activity;metal ion binding;nucleotide binding;protein binding;transporter activity	Pf00122, Pf00689, Pf00690, Pf00702, Pf08282, Pf12424, Pf12710, Pf13246	493		ATP2B4	1	cAMP signaling pathway; cGMP-PKG signaling pathway; Calcium signaling pathway; Adrenergic signaling in cardiomyocytes; Pancreatic secretion; Salivary secretion	Ion homeostasis; Reduction of cytosolic Ca++ levels; Ion transport by P-type ATPases		16	0.688	0.548	0.997	1.105	0.843	0.216	0.183	0.168	103.4	349.2	63.3	88.2	135.4	99	9.4	24.7	27.4	9.77245e+06	3.30005e+07	5.97991e+06
High	Master Protein	Q9Y4L1	Hypoxia up-regulated protein 1 [OS=Homo sapiens]	>ProteinCenter:SwissProt|Q9Y4L1 Hypoxia up-regulated protein 1 [OS=Homo sapiens]	0	FALSE	37.366	12	10	10	24	10	999	111.3	5.22	19.51	10	regulation of biological process;response to stimulus;transport	endoplasmic reticulum;extracellular;membrane;organelle lumen	nucleotide binding;protein binding	Pf00012	10525	ENSG00000280682.2; ENSG00000149428.18	HYOU1	11; CHR_HG2217_PATCH	Protein processing in endoplasmic reticulum	Scavenging by Class F Receptors; XBP1(S) activates chaperone genes		8	1.031	0.892	4.924	3.803	1.428	1.234	1.858	1.509	50.2	45	48.1	248.8	203.9	66.8	68.6	92.5	76.1	2.35144e+07	2.10877e+07	2.25111e+07
High	Master Protein	P32119	Peroxiredoxin-2 [OS=Homo sapiens]	>ProteinCenter:SwissProt|P32119 Peroxiredoxin-2 [OS=Homo sapiens]	0	FALSE	37.067	40	10	11	44	9	198	21.9	5.97	42.84	10	cell communication;cellular homeostasis;metabolic process;regulation of biological process;response to stimulus	cytoplasm;cytosol;membrane	antioxidant activity;catalytic activity;protein binding	Pf00578, Pf08534, Pf10417	7001	ENSG00000167815.11	PRDX2	19		TP53 Regulates Metabolic Genes; Deregulated CDK5 triggers multiple neurodegenerative pathways in Alzheimer's disease models; Detoxification of Reactive Oxygen Species	Selenium Micronutrient Network	12	0.639	0.658	1.652	1.853	1.395	1.049	2.131	2.271	72.7	42.2	45.2	114.9	129.3	75.6	77.9	172	170.1	9.2637e+07	5.37769e+07	5.75433e+07
High	Master Protein	P22102-1	trifunctional purine biosynthetic protein adenosine-3 [OS=Homo sapiens]	>ProteinCenter:SwissProt|P22102-1 trifunctional purine biosynthetic protein adenosine-3 [OS=Homo sapiens]	0	FALSE	37.063	14	10	10	34	10	1010	107.7	6.7	27.38	10	metabolic process;response to stimulus	cytoplasm;cytosol	catalytic activity;metal ion binding;nucleotide binding	Pf00551, Pf00586, Pf01071, Pf02222, Pf02655, Pf02769, Pf02843, Pf02844, Pf03435, Pf07478, Pf08442, Pf08443, Pf13535, Pf15632	2618	ENSG00000159131.16	GART	21	Metabolic pathways; Purine metabolism; One carbon pool by folate; Antifolate resistance	Purine ribonucleoside monophosphate biosynthesis	Folate Metabolism; One Carbon Metabolism	10	0.744	0.694	1.932	1.654	0.765	0.734	1.009	1.236	94.8	55.9	59.3	188.1	131.2	58.3	60.1	115.7	136.6	5.85315e+07	3.45561e+07	3.66315e+07
High	Master Protein	P53621-1	coatomer subunit alpha [OS=Homo sapiens]	>ProteinCenter:SwissProt|P53621-1 coatomer subunit alpha [OS=Homo sapiens]	0	FALSE	36.985	11	11	11	33	11	1224	138.3	7.66	35.74	11	regulation of biological process;transport	cytoplasm;cytosol;extracellular;Golgi;membrane	protein binding;structural molecule activity	Pf00400, Pf04053, Pf06957	1314	ENSG00000122218.14	COPA	1		COPI-dependent Golgi-to-ER retrograde traffic; COPI-mediated anterograde transport		11	0.766	0.808	2.534	1.707	1.462	0.986	1.415	1.015	86.2	62.7	72.2	192.9	136.7	100.2	85.9	83.3	80	3.80588e+07	2.76809e+07	3.18682e+07
High	Master Protein	P41252	isoleucine--tRNA ligase, cytoplasmic [OS=Homo sapiens]	>ProteinCenter:SwissProt|P41252 isoleucine--tRNA ligase, cytoplasmic [OS=Homo sapiens]	0	FALSE	36.875	11	12	12	41	12	1262	144.4	6.15	42.26	12	cell differentiation;metabolic process;regulation of biological process	cytoplasm;cytosol;membrane	catalytic activity;nucleotide binding;protein binding;RNA binding	Pf00133, Pf01406, Pf08264, Pf09334	3376	ENSG00000196305.17	IARS	9	Aminoacyl-tRNA biosynthesis	Cytosolic tRNA aminoacylation; SeMet incorporation into proteins	Amino Acid metabolism	10	0.726	0.709	2.617	2.339	1.471	1.136	1.597	1.271	80.3	56.4	63.9	174.7	137.9	109.4	83.5	108.6	85.2	5.7201e+07	4.01284e+07	4.54799e+07
High	Master Protein	P55060-1	Exportin-2 [OS=Homo sapiens]	>ProteinCenter:SwissProt|P55060-1 Exportin-2 [OS=Homo sapiens]	0	FALSE	36.746	14	12	13	21	12	971	110.3	5.77	21.5	12	cell death;cell proliferation;transport	cytoplasm;cytosol;membrane;nucleus	protein binding;transporter activity	Pf03378, Pf03810, Pf08506	1434	ENSG00000124207.16	CSE1L	20				0	0.7	0.778	4.803	3.263	2.165	1.185	1.773	1.611	54.5	36.7	41.3	234.5	173.9	113.6	46.7	98.8	100.1	2.63197e+07	1.77214e+07	1.99425e+07
High	Master Protein	Q9H4G0-1	Band 4.1-like protein 1 [OS=Homo sapiens]	>ProteinCenter:SwissProt|Q9H4G0-1 Band 4.1-like protein 1 [OS=Homo sapiens]	0	FALSE	36.738	13	11	11	25	1	881	98.4	5.62	33.52	11	cell organization and biogenesis	cytoplasm;cytoskeleton;cytosol;membrane	protein binding;structural molecule activity	Pf00373, Pf04382, Pf05902, Pf08736, Pf09379, Pf09380	2036	ENSG00000088367.21	EPB41L1	20	Tight junction	Trafficking of AMPA receptors; Neurexins and neuroligins		8			100	100	100		100					214.8	397.4	214.9		72.9
High	Master Protein	O43491-4	Isoform 4 of Band 4.1-like protein 2 [OS=Homo sapiens]	>ProteinCenter:SwissProt|O43491-4 Isoform 4 of Band 4.1-like protein 2 [OS=Homo sapiens]	0	FALSE	36.711	17	13	13	30	1	852	95.5	5.77	30.71	13	cell division;cell organization and biogenesis;transport	cytoskeleton;cytosol;membrane;nucleus	protein binding;structural molecule activity	Pf00373, Pf05902, Pf08736, Pf09379, Pf09380	2037	ENSG00000079819.18	EPB41L2	6				0	1.166	1.73	0.372	0.396	0.177	1.164	0.493	0.759	124	144.5	214.6	46.2	49.1	22	144.3	61.1	94.1	1.00779e+07	1.1746e+07	1.74393e+07
High	Master Protein	Q96F07-2	Isoform 2 of Cytoplasmic FMR1-interacting protein 2 [OS=Homo sapiens]	>ProteinCenter:SwissProt|Q96F07-2 Isoform 2 of Cytoplasmic FMR1-interacting protein 2 [OS=Homo sapiens]	0	FALSE	36.685	8	11	11	44	1	1253	145.6	7.05	51.18	11	cell death;cell growth;metabolic process;regulation of biological process;response to stimulus	cytoplasm;cytosol;membrane;nucleus	protein binding	Pf05994, Pf07159	26999	ENSG00000055163.19	CYFIP2	5			Regulation of Actin Cytoskeleton	1	0.867	1.16	0.476	0.378	0.563	1.229	0.88	1.114	117.4	101.7	136.1	55.9	44.3	66.1	144.2	103.3	130.8	3.35842e+06	2.91022e+06	3.89449e+06
High	Master Protein	P11166	Solute carrier family 2, facilitated glucose transporter member 1 [OS=Homo sapiens]	>ProteinCenter:SwissProt|P11166 Solute carrier family 2, facilitated glucose transporter member 1 [OS=Homo sapiens]	0	FALSE	36.426	10	8	9	43	8	492	54	8.72	41.71	8	cell communication;cell organization and biogenesis;metabolic process;regulation of biological process;response to stimulus;transport	cytoplasm;cytoskeleton;cytosol;membrane;nucleus	protein binding;transporter activity	Pf00083, Pf07690, Pf13347	6513	ENSG00000117394.20	SLC2A1	1	Glucagon signaling pathway; Bile secretion; Insulin resistance; Insulin secretion; HIF-1 signaling pathway; Pathways in cancer; Adipocytokine signaling pathway; Central carbon metabolism in cancer; HTLV-I infection; Renal cell carcinoma; Thyroid hormone signaling pathway	Lactose synthesis; Defective SLC2A1 causes GLUT1 deficiency syndrome 1 (GLUT1DS1); Cellular hexose transport; Regulation of insulin secretion; Vitamin C (ascorbate) metabolism	Cori Cycle; NRF2 pathway; Photodynamic therapy-induced HIF-1 survival signaling; Angiopoietin Like Protein 8 Regulatory Pathway; Focal Adhesion-PI3K-Akt-mTOR-signaling pathway; Insulin Signaling; Glycolysis and Gluconeogenesis	33	0.869	0.969	1.398	2.292	1.703	1.583	1.141	1.695	75.8	62.7	71.6	104.2	152.1	109	120.4	86.8	117.3	1.81557e+08	1.50172e+08	1.71297e+08
High	Master Protein	Q5JWF2-2	Isoform XLas-2 of Guanine nucleotide-binding protein G(s) subunit alpha isoforms XLas [OS=Homo sapiens]	>ProteinCenter:SwissProt|Q5JWF2-2 Isoform XLas-2 of Guanine nucleotide-binding protein G(s) subunit alpha isoforms XLas [OS=Homo sapiens]	0	FALSE	36.417	9	10	11	22	8	1023	109.6	5.07	19.5	10	metabolic process;regulation of biological process;response to stimulus	cytosol;membrane	catalytic activity;metal ion binding;nucleotide binding;protein binding;signal transducer activity	Pf00025, Pf00503, Pf08477	2778	ENSG00000087460.24	GNAS	20			Human Thyroid Stimulating Hormone (TSH) signaling pathway; Endothelin Pathways; Corticotropin-releasing hormone signaling pathway; Common Pathways Underlying Drug Addiction; Myometrial Relaxation and Contraction Pathways; G Protein Signaling Pathways; Calcium Regulation in the Cardiac Cell; Estrogen signaling pathway; Serotonin Receptor 4/6/7 and NR3C Signaling	9	0.558	0.431	6.751	11.366	7.389	0.926	2.224	1.088	23.1	13	10.6	168.2	349.1	236.8	18.4	53.6	27.1	1.42599e+07	8.02062e+06	6.53016e+06
High	Master Protein	P67936	Tropomyosin alpha-4 chain [OS=Homo sapiens]	>ProteinCenter:SwissProt|P67936 Tropomyosin alpha-4 chain [OS=Homo sapiens]	0	FALSE	36.318	35	8	8	23	5	248	28.5	4.69	32.77	8	cell differentiation;cell organization and biogenesis;cellular component movement	cytoplasm;cytoskeleton;cytosol;membrane	metal ion binding;protein binding;structural molecule activity	Pf00261, Pf12718	7171	ENSG00000167460.14	TPM4	19	Cardiac muscle contraction; Adrenergic signaling in cardiomyocytes; Hypertrophic cardiomyopathy (HCM); Dilated cardiomyopathy	Smooth Muscle Contraction; Striated Muscle Contraction	Striated Muscle Contraction	8	0.749	0.906	3.269	8.162	4.736	2.778	6.579	5.587	30.5	24.2	26.3	92.7	148.8	77.1	100.8	202.6	197	1.61795e+07	1.28201e+07	1.39779e+07
High	Master Protein	Q9NZM1	Myoferlin [OS=Homo sapiens]	>ProteinCenter:SwissProt|Q9NZM1 Myoferlin [OS=Homo sapiens]	0	FALSE	36.28	7	12	12	33	12	2061	234.6	6.18	32.39	12	cell organization and biogenesis;regulation of biological process;response to stimulus	membrane;nucleus	protein binding	Pf00168, Pf08150, Pf08151, Pf08165	26509	ENSG00000138119.16	MYOF	10			Aryl Hydrocarbon Receptor Pathway; Hepatitis C and Hepatocellular Carcinoma	2	0.83	0.974	0.627	0.667	0.433	1.123	1.622	1.712	100.8	86.9	106.3	57	75.7	41.9	120.8	145.6	165	6.22772e+07	5.37009e+07	6.56724e+07
High	Master Protein	sp P06396	Gelsolin [OS=Homo sapiens]	>sp|GELS_HUMAN| >ProteinCenter:SwissProt|P06396 Gelsolin [OS=Homo sapiens]	0	TRUE	36.258	14	10	11	36	2	782	85.6	6.28	37.72	10												0		100	100	100	100		100	100			39.3	357.7	285.3	156.8		23.6	37.3			2.76711e+06
High	Master Protein	P12109	Collagen alpha-1(VI) chain [OS=Homo sapiens]	>ProteinCenter:SwissProt|P12109 Collagen alpha-1(VI) chain [OS=Homo sapiens]	0	FALSE	36.213	12	11	11	54	11	1028	108.5	5.43	45.66	11	cell differentiation;cell organization and biogenesis;metabolic process;response to stimulus	extracellular;membrane;organelle lumen	protein binding	Pf00092, Pf01391, Pf13519	1291	ENSG00000142156.14	COL6A1	21	ECM-receptor interaction; Protein digestion and absorption; PI3K-Akt signaling pathway; Focal adhesion	ECM proteoglycans; Collagen degradation; Integrin cell surface interactions; Assembly of collagen fibrils and other multimeric structures; Collagen chain trimerization; NCAM1 interactions; Signaling by PDGF	miRNA targets in ECM and membrane receptors	21	1.182	1.053	0.442	0.301	0.678	0.748	0.444	0.645	134.4	154.7	160.6	60.6	45.1	95.5	100.3	60.9	87.9	6.75374e+08	7.77046e+08	8.06773e+08
High	Master Protein	P00533-1	epidermal growth factor receptor [OS=Homo sapiens]	>ProteinCenter:SwissProt|P00533-1 epidermal growth factor receptor [OS=Homo sapiens]	0	FALSE	36.189	11	11	11	32	11	1210	134.2	6.68	34.38	11	cell organization and biogenesis;cell proliferation;cellular component movement;development;metabolic process;regulation of biological process;response to stimulus	cell surface;cytoplasm;endoplasmic reticulum;endosome;extracellular;Golgi;membrane;nucleus;organelle lumen	catalytic activity;DNA binding;enzyme regulator activity;nucleotide binding;protein binding;receptor activity;signal transducer activity	Pf00069, Pf00757, Pf01030, Pf07714, Pf14843	1956	ENSG00000146648.17	EGFR	7	HIF-1 signaling pathway; Glioma; Calcium signaling pathway; Breast cancer; Endocrine resistance; Rap1 signaling pathway; Adherens junction; FoxO signaling pathway; EGFR tyrosine kinase inhibitor resistance; Endocytosis; Pathways in cancer; Epithelial cell signaling in Helicobacter pylori infection; Oxytocin signaling pathway; Hepatitis C; Phospholipase D signaling pathway; Proteoglycans in cancer…	EGFR interacts with phospholipase C-gamma; TFAP2 (AP-2) family regulates transcription of growth factors and their receptors; SHC1 events in ERBB2 signaling; EGFR downregulation; Signaling by GPCR; ERBB2 Regulates Cell Motility; GRB2 events in EGFR signaling; EGFR Transactivation by Gastrin; ERBB2 Activates PTK6 Signaling; Constitutive Signaling by Aberrant PI3K in Cancer; Interleukin-20 family s…	Androgen receptor signaling pathway; Signaling Pathways in Glioblastoma; AGE/RAGE pathway; Gastric cancer network 2; Spinal Cord Injury; Aryl Hydrocarbon Receptor; Bladder Cancer; TCA Cycle Nutrient Utilization and Invasiveness of Ovarian Cancer; Extracellular vesicle-mediated signaling in recipient cells; Aryl Hydrocarbon Receptor Pathway; Focal Adhesion; Rac1/Pak1/p38/MMP-2 pathway; Association…	115	0.723	0.718	1.982	4.1	3.348	0.137	0.413	0.158	90.4	64.7	68.4	158.7	283.1	213.7	4.2	12.8	4.1	3.461e+07	2.47715e+07	2.61894e+07
High	Master Protein	O95782	AP-2 complex subunit alpha-1 [OS=Homo sapiens]	>ProteinCenter:SwissProt|O95782 AP-2 complex subunit alpha-1 [OS=Homo sapiens]	0	FALSE	36.1	17	13	13	32	9	977	107.5	7.03	32.35	13	cell organization and biogenesis;cellular component movement;metabolic process;regulation of biological process;response to stimulus;transport	cytosol;membrane	protein binding;transporter activity	Pf01602, Pf02296, Pf02883, Pf13646	160	ENSG00000196961.12	AP2A1	19	Endocytosis; Endocrine and other factor-regulated calcium reabsorption; Synaptic vesicle cycle; Huntington's disease	Cargo recognition for clathrin-mediated endocytosis; Nef Mediated CD8 Down-regulation; Nef Mediated CD4 Down-regulation; Trafficking of GluR2-containing AMPA receptors; Recycling pathway of L1; LDL clearance; EPH-ephrin mediated repulsion of cells; Retrograde neurotrophin signalling; VLDLR internalisation and degradation; WNT5A-dependent internalization of FZD2, FZD5 and ROR2; MHC class II antige…	Synaptic Vesicle Pathway; EGF/EGFR Signaling Pathway	48	0.808	0.659	1.493	2.048	1.533	1.287	1.122	0.914	81.9	62.3	57.7	121	132.7	126.9	107	100.9	109.5	1.8229e+07	1.38696e+07	1.28356e+07
High	Master Protein	Q16555-1	Dihydropyrimidinase-related protein 2 [OS=Homo sapiens]	>ProteinCenter:SwissProt|Q16555-1 Dihydropyrimidinase-related protein 2 [OS=Homo sapiens]	0	FALSE	35.656	20	10	10	32	8	572	62.3	6.38	29.36	10	cell differentiation;cell organization and biogenesis;cellular component movement;development;metabolic process;regulation of biological process;response to stimulus;transport	cytoplasm;cytoskeleton;cytosol;membrane	catalytic activity;protein binding	Pf01979, Pf07969, Pf13147, Pf13594	1808	ENSG00000092964.17	DPYSL2	8	Axon guidance	Recycling pathway of L1; CRMPs in Sema3A signaling	Regulation of Microtubule Cytoskeleton; Brain-Derived Neurotrophic Factor (BDNF) signaling pathway	9	0.976	0.973	0.661	0.545	1.237	1.214	1.7	1.268	101.3	101.3	112.1	65.8	52.3	86.9	125	116	139.4	1.2015e+08	1.20052e+08	1.3291e+08
High	Master Protein	Q7KZI7-1	Serine/threonine-protein kinase MARK2 [OS=Homo sapiens]	>ProteinCenter:SwissProt|Q7KZI7-1 Serine/threonine-protein kinase MARK2 [OS=Homo sapiens]	0	FALSE	35.592	19	13	13	23	10	788	87.9	9.72	25.7	13	cell differentiation;cell organization and biogenesis;cellular component movement;development;metabolic process;regulation of biological process;response to stimulus	cytoplasm;cytoskeleton;membrane;mitochondrion	catalytic activity;enzyme regulator activity;metal ion binding;nucleotide binding;protein binding;RNA binding	Pf00069, Pf00627, Pf02149, Pf07714, Pf14531	2011	ENSG00000072518.20	MARK2	11			Regulation of Microtubule Cytoskeleton	1	0.783	0.871	5.498	6.189	3.326	1.857	3.138	2.897	30.8	16.1	23.3	188.5	239.9	142.2	68.7	103.5	87	1.02098e+07	5.34109e+06	7.72753e+06
High	Master Protein	P33527	Multidrug resistance-associated protein 1 [OS=Homo sapiens]	>ProteinCenter:SwissProt|P33527 Multidrug resistance-associated protein 1 [OS=Homo sapiens]	0	FALSE	35.52	9	12	13	24	11	1531	171.5	7.11	25.45	12	cell organization and biogenesis;cellular component movement;metabolic process;response to stimulus;transport	membrane	catalytic activity;nucleotide binding;transporter activity	Pf00005, Pf00664	4363	ENSG00000278183.4; ENSG00000103222.18	ABCC1	16; CHR_HSCHR16_1_CTG1	Antifolate resistance; ABC transporters; Sphingolipid signaling pathway; MicroRNAs in cancer; Vitamin digestion and absorption	Cobalamin (Cbl, vitamin B12) transport and metabolism; Synthesis of Leukotrienes (LT) and Eoxins (EX); ABC-family proteins mediated transport	Irinotecan Pathway	16	0.624	0.606	1.245	2.289	1.301	0.612	0.981	1.179	109.9	63.6	51.4	131.3	201.5	109.8	53	92.7	86.8	2.1433e+07	1.24074e+07	1.0024e+07
High	Master Protein	P63096-1	Guanine nucleotide-binding protein G(i) subunit alpha-1 [OS=Homo sapiens]	>ProteinCenter:SwissProt|P63096-1 Guanine nucleotide-binding protein G(i) subunit alpha-1 [OS=Homo sapiens]	0	FALSE	35.362	32	10	11	43	3	354	40.3	5.97	46.3	10	cell division;metabolic process;regulation of biological process;response to stimulus;transport	cytoplasm;cytoskeleton;membrane;nucleus	catalytic activity;metal ion binding;nucleotide binding;protein binding;signal transducer activity	Pf00025, Pf00503	2770	ENSG00000127955.15	GNAI1	7	Rap1 signaling pathway; Sphingolipid signaling pathway; Tight junction; Long-term depression; Adrenergic signaling in cardiomyocytes; Estrogen signaling pathway; Circadian entrainment; Alcoholism; cGMP-PKG signaling pathway; Leukocyte transendothelial migration; Chagas disease (American trypanosomiasis); Melanogenesis; Platelet activation; Pathways in cancer; Axon guidance; Progesterone-mediated …	G alpha (z) signalling events; Cooperation of PDCL (PhLP1) and TRiC/CCT in G-protein beta folding; G alpha (s) signalling events; PLC beta mediated events; ADP signalling through P2Y purinoceptor 12; Adrenaline,noradrenaline inhibits insulin secretion; Adenylate cyclase inhibitory pathway; G-protein activation	Nicotine Activity on Dopaminergic Neurons; Human Thyroid Stimulating Hormone (TSH) signaling pathway; Endothelin Pathways; Corticotropin-releasing hormone signaling pathway; Signal Transduction of S1P Receptor; Common Pathways Underlying Drug Addiction; G Protein Signaling Pathways; Cell-type Dependent Selectivity of CCK2R Signaling; Chemokine signaling pathway; Calcium Regulation in the Cardiac …	74	0.747	0.619	1.512	2.473	1.927	0.239	0.422	0.302	123.6	93	74.6	140.8	210.6	139.3	20	58.9	39.1	3.27188e+07	2.46379e+07	1.97564e+07
High	Master Protein	P01892	HLA class I histocompatibility antigen, A-2 alpha chain [OS=Homo sapiens]	>ProteinCenter:SwissProt|P01892 HLA class I histocompatibility antigen, A-2 alpha chain [OS=Homo sapiens]	0	FALSE	35.281	31	9	10	29	2	365	40.9	6.99	33.35	9	cell organization and biogenesis;defense response;metabolic process;regulation of biological process;response to stimulus	cell surface;endoplasmic reticulum;Golgi;membrane	protein binding;RNA binding	Pf00129, Pf07654	3105; 100507703	ENSG00000235657.9	HLA-A; LOC100507703	6; CHR_HSCHR6_MHC_DBB_CTG1		Interferon alpha/beta signaling; E3 ubiquitin ligases ubiquitinate target proteins; Endosomal/Vacuolar pathway; Immunoregulatory interactions between a Lymphoid and a non-Lymphoid cell; Interferon gamma signaling; Antigen Presentation: Folding, assembly and peptide loading of class I MHC; ER-Phagosome pathway; Nef mediated downregulation of MHC class I complex cell surface expression	Proteasome Degradation; Allograft Rejection	25	0.786	0.517	0.01	0.01	0.01	0.921	1.329	0.889	155.3	129.3	89.6				174.5	211.2	140.1	6.91815e+06	5.75816e+06	3.99038e+06
High	Master Protein	P16422	Epithelial cell adhesion molecule [OS=Homo sapiens]	>ProteinCenter:SwissProt|P16422 Epithelial cell adhesion molecule [OS=Homo sapiens]	0	FALSE	35.207	29	9	11	39	9	314	34.9	7.46	52.74	9	cell differentiation;cellular component movement;regulation of biological process;response to stimulus	cell surface;membrane	protein binding	Pf00086	4072	ENSG00000119888.10	EPCAM	2		Cell surface interactions at the vascular wall		2	0.878	1.022	1.577	3.893	2.612	1.796	1.202	0.944	91.3	100.7	206.4	65.6	126.3	92.5	103.7	20	93.5	9.86661e+07	1.08914e+08	2.23142e+08
High	Master Protein	Q9Y265	RuvB-like 1 [OS=Homo sapiens]	>ProteinCenter:SwissProt|Q9Y265 RuvB-like 1 [OS=Homo sapiens]	0	FALSE	35.185	34	12	12	28	12	456	50.2	6.42	22.68	12	cell division;cell organization and biogenesis;metabolic process;regulation of biological process;response to stimulus	cytoplasm;cytoskeleton;cytosol;membrane;nucleus	catalytic activity;nucleotide binding;protein binding	Pf00004, Pf01078, Pf01695, Pf05496, Pf06068, Pf06414, Pf07726, Pf13191, Pf13238, Pf13245, Pf13481	8607	ENSG00000175792.11	RUVBL1	3	Wnt signaling pathway	Ub-specific processing proteases; UCH proteinases; DNA Damage Recognition in GG-NER; HATs acetylate histones; Formation of the beta-catenin:TCF transactivating complex; Telomere Extension By Telomerase; Deposition of new CENPA-containing nucleosomes at the centromere	Gastric Cancer Network 1	25	0.875	0.972	1.538	1.67	1.128	0.864	1.163	1.072	92.9	78.5	90.2	136.3	119.9	86.9	91.2	101.7	102.4	1.27692e+08	1.07848e+08	1.2396e+08
High	Master Protein	P02768-1 sp P02768-1	SWISS-PROT:P02768-1 Tax_Id=9606 Gene_Symbol=ALB Isoform 1 of Serum albumin precursor Serum albumin [OS=Homo sapiens]	>P02768-1 SWISS-PROT:P02768-1 Tax_Id=9606 Gene_Symbol=ALB Isoform 1 of Serum albumin precursor >sp|ALBU_HUMAN| >ProteinCenter:SwissProt|P02768-1 Serum albumin [OS=Homo sapiens]	0	TRUE	35.025	16	9	10	56	6	609	69.3	6.28	46.94	9	cell communication;cell organization and biogenesis;metabolic process;regulation of biological process;response to stimulus;transport	cytoplasm;endoplasmic reticulum;extracellular;Golgi;nucleus;organelle lumen	antioxidant activity;catalytic activity;DNA binding;metal ion binding;protein binding	Pf00273	213	ENSG00000163631.16	ALB	4	Thyroid hormone synthesis	Post-translational protein phosphorylation; Regulation of Insulin-like Growth Factor (IGF) transport and uptake by Insulin-like Growth Factor Binding Proteins (IGFBPs); Scavenging of heme from plasma; Platelet degranulation ; Defective SLCO1B1 causes hyperbilirubinemia, Rotor type (HBLRR); HDL remodeling; Defective SLCO1B3 causes hyperbilirubinemia, Rotor type (HBLRR); Transport of organic anions…	Selenium Micronutrient Network; Vitamin B12 Metabolism; Folate Metabolism	32	0.877	1.349	0.562		0.523	3.671	20.976		4.6	21.1	48	7.6	8.1	7.6	226.2	553.5	23.4	305129	1.40867e+06	3.21485e+06
High	Master Protein	P36871-1	Phosphoglucomutase-1 [OS=Homo sapiens]	>ProteinCenter:SwissProt|P36871-1 Phosphoglucomutase-1 [OS=Homo sapiens]	0	FALSE	34.858	21	9	12	43	9	562	61.4	6.76	51.78	9	metabolic process;transport	cytoplasm;cytoskeleton;cytosol;extracellular	catalytic activity;metal ion binding;protein binding	Pf00408, Pf02878, Pf02879, Pf02880	5236	ENSG00000079739.15	PGM1	1	Pentose phosphate pathway; Metabolic pathways; Galactose metabolism; Glycolysis / Gluconeogenesis; Starch and sucrose metabolism; Purine metabolism; Amino sugar and nucleotide sugar metabolism	Neutrophil degranulation; Galactose catabolism; Glycogen breakdown (glycogenolysis); Glycogen synthesis; Defective PGM1 causes PGM1-CDG (CDG1t)	Ectoderm Differentiation; Glycogen Metabolism; Glucuronidation	23	0.926	0.936	0.63	0.436	0.8	0.704	0.767	0.55	138.1	128.3	137.5	70.7	54.4	107.1	85.9	82.6	95.5	1.409e+08	1.30958e+08	1.4029e+08
High	Master Protein	Q14008	Cytoskeleton-associated protein 5 [OS=Homo sapiens]	>ProteinCenter:SwissProt|Q14008 Cytoskeleton-associated protein 5 [OS=Homo sapiens]	0	FALSE	34.621	6	11	11	20	11	2032	225.4	7.8	21.36	11	cell division;cell organization and biogenesis;regulation of biological process;transport	chromosome;cytoplasm;cytoskeleton;cytosol;membrane	protein binding	Pf12348	9793	ENSG00000175216.14	CKAP5	11		Regulation of PLK1 Activity at G2/M Transition; AURKA Activation by TPX2; Anchoring of the basal body to the plasma membrane; Recruitment of NuMA to mitotic centrosomes; Recruitment of mitotic centrosome proteins and complexes; Loss of Nlp from mitotic centrosomes; Amplification of signal from unattached kinetochores via a MAD2 inhibitory signal; Separation of Sister Chromatids; Resolution of Sis…		28	0.733	0.765	2.992	1.901	1.426	1.007	2.016	1.46	60.9	45	44.7	177.3	157.2	108.6	66.1	135.5	104.8	1.42619e+07	1.05411e+07	1.04569e+07
High	Master Protein	P26373-1	60S ribosomal protein L13 [OS=Homo sapiens]	>ProteinCenter:SwissProt|P26373-1 60S ribosomal protein L13 [OS=Homo sapiens]	0	FALSE	34.464	31	8	9	42	8	211	24.2	11.65	53.36	8	cell organization and biogenesis;metabolic process;transport	cytosol;membrane;nucleus;ribosome	protein binding;RNA binding;structural molecule activity	Pf01294	6137	ENSG00000167526.13	RPL13	16	Ribosome	Peptide chain elongation; Eukaryotic Translation Termination; Viral mRNA Translation; L13a-mediated translational silencing of Ceruloplasmin expression; Nonsense Mediated Decay (NMD) independent of the Exon Junction Complex (EJC); Selenocysteine synthesis; Nonsense Mediated Decay (NMD) enhanced by the Exon Junction Complex (EJC); GTP hydrolysis and joining of the 60S ribosomal subunit; Major path…	Cytoplasmic Ribosomal Proteins	34	0.789	1.05	2.103	1.245	0.919	1.159	1.18	1.563	72.8	58.4	67.1	206.3	126.8	68.3	76.8	108	115.6	8.46322e+07	6.7858e+07	7.80521e+07
High	Master Protein	O43491-1	band 4.1-like protein 2 [OS=Homo sapiens]	>ProteinCenter:SwissProt|O43491-1 band 4.1-like protein 2 [OS=Homo sapiens]	0	FALSE	34.429	15	13	13	29	1	1005	112.5	5.44	30.7	13	cell division;cell organization and biogenesis;transport	cytoplasm;cytoskeleton;cytosol;membrane;nucleus	protein binding;structural molecule activity	Pf00373, Pf04382, Pf05902, Pf08736, Pf09379, Pf09380	2037	ENSG00000079819.18	EPB41L2	6	Tight junction	Neurexins and neuroligins		4	0.01	0.01	0.075	0.106	0.078	0.01	0.01	0.01	714.6			53.8	75.7	55.8				1.67644e+06
High	Master Protein	P01023	alpha-2-macroglobulin [OS=Homo sapiens]	>ProteinCenter:SwissProt|P01023 alpha-2-macroglobulin [OS=Homo sapiens]	0	FALSE	34.392	4	6	8	78	1	1474	163.2	6.46	50.93	6	cell differentiation;cell organization and biogenesis;metabolic process;regulation of biological process;response to stimulus;transport	cytosol;extracellular;organelle lumen	enzyme regulator activity;protein binding	Pf00207, Pf01835, Pf07677, Pf07678, Pf07703, Pf10569, Pf11974, Pf13249	2	ENSG00000175899.14	A2M	12	Complement and coagulation cascades	Platelet degranulation ; Degradation of the extracellular matrix; Rho GTPase cycle; HDL assembly; Intrinsic Pathway of Fibrin Clot Formation	Complement and Coagulation Cascades	17	3.099	2.249	0.01	0.01	0.01	1.016	0.01	0.713	111.4	345.3	250.7				113.2		79.4	2.78885e+07	8.64305e+07	6.27341e+07
High	Master Protein	P31947-1	14-3-3 protein sigma [OS=Homo sapiens]	>ProteinCenter:SwissProt|P31947-1 14-3-3 protein sigma [OS=Homo sapiens]	0	FALSE	34.34	30	9	9	31	6	248	27.8	4.74	44.9	9	cell differentiation;cell organization and biogenesis;regulation of biological process;response to stimulus	cytoplasm;cytosol;extracellular;membrane;mitochondrion;nucleus	enzyme regulator activity;protein binding	Pf00244	2810	ENSG00000175793.11	SFN	1	Cell cycle; Aldosterone-regulated sodium reabsorption; p53 signaling pathway	Translocation of GLUT4 to the plasma membrane; Chk1/Chk2(Cds1) mediated inactivation of Cyclin B:Cdk1 complex; TP53 Regulates Transcription of Genes Involved in G2 Cell Cycle Arrest; TP53 Regulates Metabolic Genes; Activation of BAD and translocation to mitochondria ; RHO GTPases activate PKNs	miRNA Regulation of DNA Damage Response; Myometrial Relaxation and Contraction Pathways; Calcium Regulation in the Cardiac Cell; DNA Damage Response	31	0.728	0.774	1.229	1.318	1.091	0.326	0.564	0.59	125.8	91.1	101.2	130.1	185.3	97.5	36.2	62	70.7	5.79534e+07	4.20004e+07	4.66374e+07
High	Master Protein	O14936	peripheral plasma membrane protein CASK [OS=Homo sapiens]	>ProteinCenter:SwissProt|O14936 peripheral plasma membrane protein CASK [OS=Homo sapiens]	0	FALSE	34.294	15	11	11	23	11	926	105.1	6.43	24.7	11	metabolic process;regulation of biological process;transport	cytoplasm;cytoskeleton;cytosol;membrane;nucleus	catalytic activity;nucleotide binding;protein binding	Pf00018, Pf00069, Pf00595, Pf00625, Pf02828, Pf07653, Pf07714, Pf13180, Pf14604	8573	ENSG00000147044.20	CASK	X	Tight junction	Nephrin family interactions; Dopamine Neurotransmitter Release Cycle; Neurexins and neuroligins; Syndecan interactions	Parkin-Ubiquitin Proteasomal System pathway	13	0.826	0.795	1.351	1.763	1.254	1.469	1.848	1.732	73.9	53.2	53.1	77.8	149.7	97.1	109.6	156.8	128.8	2.24311e+07	1.61639e+07	1.61387e+07
High	Master Protein	Q96RT1	Erbin [OS=Homo sapiens]	>ProteinCenter:SwissProt|Q96RT1 Erbin [OS=Homo sapiens]	0	FALSE	34.25	12	13	13	24	13	1412	158.2	5.5	25.62	13	cell growth;cell organization and biogenesis;regulation of biological process;response to stimulus;transport	cytoplasm;membrane;nucleus	protein binding;structural molecule activity	Pf00595, Pf12799, Pf13180, Pf13855	55914	ENSG00000112851.14	ERBB2IP; ERBIN	5	NOD-like receptor signaling pathway	Downregulation of ERBB2 signaling	Nucleotide-binding Oligomerization Domain (NOD) pathway; NLR Proteins; Pathways Affected in Adenoid Cystic Carcinoma	8	0.853	0.767	2.025	3.02	2.28	0.993	1.038	1.228	64.4	54.9	57.8	149.3	200.1	142	68.6	77.2	85.7	2.20145e+07	1.87893e+07	1.97621e+07
High	Master Protein	Q9UN37	Vacuolar protein sorting-associated protein 4A [OS=Homo sapiens]	>ProteinCenter:SwissProt|Q9UN37 Vacuolar protein sorting-associated protein 4A [OS=Homo sapiens]	0	FALSE	34.2	26	9	9	39	6	437	48.9	7.8	31	9	cell communication;cell division;cell organization and biogenesis;metabolic process;regulation of biological process;response to stimulus;transport	cytoplasm;cytosol;endosome;membrane;nucleus;vacuole	catalytic activity;nucleotide binding;protein binding;RNA binding	Pf00004, Pf00910, Pf01078, Pf01695, Pf04212, Pf04389, Pf06068, Pf07724, Pf07728, Pf09336, Pf13173, Pf13207, Pf13401	27183	ENSG00000132612.15	VPS4A	16	Endocytosis	Budding and maturation of HIV virion; Endosomal Sorting Complex Required For Transport (ESCRT)		10	1.021	1.146	0.438	0.408	0.345	2.541	1.371	1.373	89.5	88.7	109.4	36.5	39.3	36.7	233.3	137.8	128.7	6.75515e+07	6.6908e+07	8.25256e+07
High	Master Protein	P38606	V-type proton ATPase catalytic subunit A [OS=Homo sapiens]	>ProteinCenter:SwissProt|P38606 V-type proton ATPase catalytic subunit A [OS=Homo sapiens]	0	FALSE	34.197	16	8	8	30	8	617	68.3	5.52	34.1	8	cellular homeostasis;metabolic process;regulation of biological process;response to stimulus;transport	cytosol;membrane;mitochondrion	catalytic activity;nucleotide binding;transporter activity	Pf00006, Pf00306, Pf02874	523	ENSG00000114573.9	ATP6V1A	3	Synaptic vesicle cycle; Oxidative phosphorylation; Epithelial cell signaling in Helicobacter pylori infection; Phagosome; Vibrio cholerae infection; mTOR signaling pathway; Rheumatoid arthritis; Collecting duct acid secretion; Metabolic pathways	Transferrin endocytosis and recycling; ROS, RNS production in phagocytes; Ion channel transport; Insulin receptor recycling		20	0.656	0.56	1.759	1.406	1.285	0.715	0.851	0.758	96.5	68.5	65.6	137.7	143.5	116.8	76.6	115	79.9	4.08025e+07	2.89504e+07	2.77297e+07
High	Master Protein	P62158	Calmodulin [OS=Homo sapiens]	>ProteinCenter:SwissProt|P62158 Calmodulin [OS=Homo sapiens]	0	FALSE	34.172	30	6	7	35	6	149	16.8	4.22	44.3	6	metabolic process;regulation of biological process;response to stimulus;transport	cytoplasm;cytoskeleton;cytosol;extracellular;membrane	catalytic activity;enzyme regulator activity;metal ion binding;protein binding;transporter activity	Pf00036, Pf08726, Pf12763, Pf13202, Pf13405, Pf13499, Pf13833, Pf14658	808; 805; 801	ENSG00000160014.16; ENSG00000143933.16; ENSG00000198668.10	CALM3; CALM2; CALM1	19; 2; 14	Insulin signaling pathway; Neurotrophin signaling pathway; Olfactory transduction; Phosphatidylinositol signaling system; Glucagon signaling pathway; Aldosterone synthesis and secretion; Inflammatory mediator regulation of TRP channels; GnRH signaling pathway; Dopaminergic synapse; Renin secretion; Oxytocin signaling pathway; Glioma; Tuberculosis; Alzheimer's disease; Salivary secretion; Ras sign…	Smooth Muscle Contraction; Uptake and function of anthrax toxins; Stimuli-sensing channels; Translocation of GLUT4 to the plasma membrane; Synthesis of IP3 and IP4 in the cytosol; Reduction of cytosolic Ca++ levels; CREB phosphorylation through the activation of CaMKII; Ion homeostasis; Ca2+ pathway; Phase 0 - rapid depolarisation; Calcineurin activates NFAT; Platelet degranulation ; eNOS activat…	Physiological and Pathological Hypertrophy of the Heart; MicroRNAs in cardiomyocyte hypertrophy; Alzheimers Disease; Endothelin Pathways; T-Cell Receptor and Co-stimulatory Signaling; Common Pathways Underlying Drug Addiction; Cardiac Hypertrophic Response; Myometrial Relaxation and Contraction Pathways; Melatonin metabolism and effects; G Protein Signaling Pathways; T-Cell antigen Receptor (TCR)…	150	0.714	0.489	9.758	52.377	24.636	1.1	7.039	1.372	13.7	10.6	6.6	119.1	423.3	235.6	14.7	56.9	19.5	4.1339e+07	3.18947e+07	1.99997e+07
High	Master Protein	Q6PCB0	von Willebrand factor A domain-containing protein 1 [OS=Homo sapiens]	>ProteinCenter:SwissProt|Q6PCB0 von Willebrand factor A domain-containing protein 1 [OS=Homo sapiens]	0	FALSE	34.163	30	10	10	29	10	445	46.8	7.68	27.69	10	cell organization and biogenesis;metabolic process;response to stimulus	extracellular;organelle lumen	protein binding	Pf00041, Pf00092, Pf13519	64856	ENSG00000179403.11	VWA1	1		Post-translational protein phosphorylation; Regulation of Insulin-like Growth Factor (IGF) transport and uptake by Insulin-like Growth Factor Binding Proteins (IGFBPs)		4	0.755	0.737	0.41	0.553	0.576	0.157	0.195	0.495	170.1	177.6	196.9	50	64.7	66.1	38.2	21.3	115	7.20217e+07	7.51841e+07	8.33536e+07
High	Master Protein	P09211	Glutathione S-transferase P [OS=Homo sapiens]	>ProteinCenter:SwissProt|P09211 Glutathione S-transferase P [OS=Homo sapiens]	0	FALSE	34.047	37	6	10	36	1	210	23.3	5.64	20.66	6	cell communication;cell proliferation;metabolic process;regulation of biological process;response to stimulus;transport	cytoplasm;cytosol;extracellular;membrane;mitochondrion;nucleus;organelle lumen	antioxidant activity;catalytic activity;enzyme regulator activity;protein binding	Pf00043, Pf02798, Pf14497	2950	ENSG00000084207.15	GSTP1	11	Pathways in cancer; Drug metabolism - cytochrome P450; Metabolism of xenobiotics by cytochrome P450; Platinum drug resistance; Prostate cancer; Glutathione metabolism; Chemical carcinogenesis	Glutathione conjugation; Neutrophil degranulation; Detoxification of Reactive Oxygen Species	NRF2 pathway; Photodynamic therapy-induced NFE2L2 (NRF2) survival signaling; Exercise-induced Circadian Regulation; Arachidonate Epoxygenase / Epoxide Hydrolase; Metapathway biotransformation	22	0.722	0.819	6.002	5.019	2.168	4.292	5.784	9.596	25.4	18.3	20.8	152.6	127.6	55.1	109.1	147	244	963984	695618	789880
High	Master Protein	Q9BQL6-1	Fermitin family homolog 1 [OS=Homo sapiens]	>ProteinCenter:SwissProt|Q9BQL6-1 Fermitin family homolog 1 [OS=Homo sapiens]	0	FALSE	33.967	19	10	10	17	9	677	77.4	6.28	15.2	10	cell organization and biogenesis;cell proliferation;cellular component movement;regulation of biological process	cytoplasm;cytoskeleton;cytosol;membrane		Pf00169, Pf00373	55612	ENSG00000101311.15	FERMT1	20				0	0.814	1	4.404	4.529	3.611	1.081	2.069	1.801	44.4	26.4	34.6	192.2	241.7	188.9	41.5	68.4	61.8	9.69342e+06	5.76987e+06	7.55823e+06
High	Master Protein	Q14847	LIM and SH3 domain protein 1 [OS=Homo sapiens]	>ProteinCenter:SwissProt|Q14847 LIM and SH3 domain protein 1 [OS=Homo sapiens]	0	FALSE	33.848	28	8	9	44	8	261	29.7	7.05	50.34	8	regulation of biological process;transport	cytoplasm;cytoskeleton	metal ion binding;protein binding;transporter activity	Pf00018, Pf00412, Pf00880, Pf07653, Pf14604	3927	ENSG00000002834.17	LASP1	17				0	0.872	1.123	4.123	6.204	4.034	2.05	3.124	3.243	37.9	32.5	42.6	149.2	207.2	115.1	77.6	108.6	129.4	4.26374e+07	3.65374e+07	4.79149e+07
High	Master Protein	Q9QWL7	SWISS-PROT:Q9QWL7 Tax_Id=10090 Gene_Symbol=Krt17 Keratin, type I cytoskeletal 17	>Q9QWL7 SWISS-PROT:Q9QWL7 Tax_Id=10090 Gene_Symbol=Krt17 Keratin, type I cytoskeletal 17	0	TRUE	33.834	21	11	11	29	2	433	48.1	5.06	32.35	11	cell organization and biogenesis;regulation of biological process;response to stimulus	cytoplasm;cytoskeleton	catalytic activity;motor activity;protein binding;receptor activity;signal transducer activity;structural molecule activity	Pf00038, Pf01576, Pf07888	16667	ENSMUSG00000035557.9	Krt17	11		Formation of the cornified envelope	EGFR1 Signaling Pathway	4	100	100	100	100	100	100	100	100		17.7	206.4	133.8	214.8	55.5	53.9	93.7	124		496495	5.79576e+06
High	Master Protein	Q9H5V8-1	CUB domain-containing protein 1 [OS=Homo sapiens]	>ProteinCenter:SwissProt|Q9H5V8-1 CUB domain-containing protein 1 [OS=Homo sapiens]	0	FALSE	33.8	12	10	10	33	10	836	92.9	7.96	31.77	10		extracellular;membrane	protein binding		64866	ENSG00000163814.7	CDCP1	3				0	0.676	0.695	0.372	0.673	0.566	0.435	0.548	0.432	193.1	139.4	144.3	43.4	63.8	51.4	91.6	84.2	88.9	1.97521e+08	1.42598e+08	1.47646e+08
High	Master Protein	Q9Y617-1	phosphoserine aminotransferase [OS=Homo sapiens]	>ProteinCenter:SwissProt|Q9Y617-1 phosphoserine aminotransferase [OS=Homo sapiens]	0	FALSE	33.638	31	10	10	31	10	370	40.4	7.66	32.97	10	metabolic process	cytoplasm;cytosol	catalytic activity	Pf00266	29968	ENSG00000135069.13	PSAT1	9	Glycine, serine and threonine metabolism; Biosynthesis of amino acids; Vitamin B6 metabolism; Metabolic pathways; Carbon metabolism	Serine biosynthesis	Trans-sulfuration and one carbon metabolism	10	0.674	0.689	1.903	2.169	1.558	1.369	3.719	2.851	58.4	41.8	40.4	88.8	131.4	78.8	100.7	195.9	163.8	5.59196e+07	4.00735e+07	3.87368e+07
High	Master Protein	P12956	X-ray repair cross-complementing protein 6 [OS=Homo sapiens]	>ProteinCenter:SwissProt|P12956 X-ray repair cross-complementing protein 6 [OS=Homo sapiens]	0	FALSE	33.627	16	8	9	19	8	609	69.8	6.64	14.81	8	cell organization and biogenesis;defense response;metabolic process;regulation of biological process;response to stimulus;transport	chromosome;cytoplasm;cytosol;extracellular;membrane;nucleus;organelle lumen	catalytic activity;DNA binding;nucleotide binding;protein binding;RNA binding	Pf02037, Pf02735, Pf03730, Pf03731	2547	ENSG00000196419.12	XRCC6	22	Non-homologous end-joining	2-LTR circle formation; Neutrophil degranulation; IRF3-mediated induction of type I IFN; Nonhomologous End-Joining (NHEJ)	Non-homologous end joining	18	0.993	1.043	1.564	1.277	0.946	0.864	1.411	0.995	101.8	110.7	121	134.6	93	47.2	82.9	105.1	103.6	5.31879e+07	5.78286e+07	6.32184e+07
High	Master Protein	P07947	tyrosine-protein kinase Yes [OS=Homo sapiens]	>ProteinCenter:SwissProt|P07947 tyrosine-protein kinase Yes [OS=Homo sapiens]	0	FALSE	33.603	20	12	12	44	4	543	60.8	6.74	44.51	12	cell differentiation;cellular component movement;defense response;metabolic process;regulation of biological process;response to stimulus;transport	cytoplasm;cytoskeleton;cytosol;Golgi;membrane	catalytic activity;nucleotide binding;protein binding	Pf00017, Pf00018, Pf00069, Pf07653, Pf07714, Pf14604	7525	ENSG00000176105.13	YES1	18	Adherens junction; Tight junction	PECAM1 interactions; CTLA4 inhibitory signaling; EPH-ephrin mediated repulsion of cells; EPHA-mediated growth cone collapse; RUNX2 regulates osteoblast differentiation; EPHB-mediated forward signaling; Regulation of signaling by CBL; CD28 co-stimulation; Regulation of KIT signaling; FCGR activation; Signaling by ERBB2	Interleukin-11 Signaling Pathway	35	0.718	0.675	1.034	1.454	1.099	0.277	0.502	0.316	127.9	99.1	112.2	113.1	155	130.6	49.3	63	49.9	6.5311e+07	5.06408e+07	5.72979e+07
High	Master Protein	P27348	14-3-3 protein theta [OS=Homo sapiens]	>ProteinCenter:SwissProt|P27348 14-3-3 protein theta [OS=Homo sapiens]	0	FALSE	33.547	39	10	11	50	6	245	27.7	4.78	60.83	10	cell organization and biogenesis;regulation of biological process;response to stimulus;transport	cytoplasm;cytosol;membrane;mitochondrion	protein binding	Pf00244	10971	ENSG00000134308.13	YWHAQ	2	Hippo signaling pathway; Cell cycle; Hepatitis B; Viral carcinogenesis; PI3K-Akt signaling pathway; Oocyte meiosis; Epstein-Barr virus infection; Pathogenic Escherichia coli infection	Translocation of GLUT4 to the plasma membrane; Chk1/Chk2(Cds1) mediated inactivation of Cyclin B:Cdk1 complex; TP53 Regulates Metabolic Genes; Activation of BAD and translocation to mitochondria ; RHO GTPases activate PKNs	Cell Cycle; Pathogenic Escherichia coli infection; Primary Focal Segmental Glomerulosclerosis FSGS; IL-3 Signaling Pathway; Myometrial Relaxation and Contraction Pathways; Calcium Regulation in the Cardiac Cell; Sudden Infant Death Syndrome (SIDS) Susceptibility Pathways	37	1.1	0.785	1.85	8.045	4.886	1.232	2.096	1.896	80.6	94.7	78.7	73.7	160.7	96.8	88.9	90.4	135.6	2.53473e+07	2.97751e+07	2.47307e+07
High	Master Protein	Q0VCM5	TREMBL:Q0VCM5 (Bos taurus) Similar to Inter-alpha-trypsin inhibitor heavy chain H1	>Q0VCM5 TREMBL:Q0VCM5 (Bos taurus) Similar to Inter-alpha-trypsin inhibitor heavy chain H1	0	TRUE	33.38	13	10	11	21	10	906	101.2	7.4	26.18	10	metabolic process;regulation of biological process	extracellular	enzyme regulator activity	Pf00092, Pf06668, Pf08487, Pf13519, Pf13768	508356		ITIH1	22				0	1.227	0.76	0.464	0.261	0.506	0.622	0.231	0.819	100.7	152.2	97.9	287	20.8	52	78	32	79.3	3.40903e+07	5.15211e+07	3.31271e+07
High	Master Protein	P18084	Integrin beta-5 [OS=Homo sapiens]	>ProteinCenter:SwissProt|P18084 Integrin beta-5 [OS=Homo sapiens]	0	FALSE	33.366	17	10	10	16	10	799	88	6.06	17.53	10	cell differentiation;cell organization and biogenesis;regulation of biological process;response to stimulus	cell surface;membrane	protein binding;receptor activity	Pf00362, Pf07965, Pf08725	3693	ENSG00000082781.11	ITGB5	3	PI3K-Akt signaling pathway; Proteoglycans in cancer; Dilated cardiomyopathy; Hypertrophic cardiomyopathy (HCM); Regulation of actin cytoskeleton; Phagosome; ECM-receptor interaction; Focal adhesion; Arrhythmogenic right ventricular cardiomyopathy (ARVC)	ECM proteoglycans; Integrin cell surface interactions; Cross-presentation of particulate exogenous antigens (phagosomes); Smooth Muscle Contraction; Molecules associated with elastic fibres; Syndecan interactions	Integrin-mediated Cell Adhesion; Arrhythmogenic Right Ventricular Cardiomyopathy; miRNA targets in ECM and membrane receptors; Focal Adhesion; VEGFA-VEGFR2 Signaling Pathway; Focal Adhesion-PI3K-Akt-mTOR-signaling pathway	29	0.773	1.07	3.551	3.607	3.754	0.233	0.221	0.201	73.5	59	78.8	157.9	228.4	261.2	15.1	17.4	8.6	3.62847e+07	2.91306e+07	3.88806e+07
High	Master Protein	O00303	Eukaryotic translation initiation factor 3 subunit F [OS=Homo sapiens]	>ProteinCenter:SwissProt|O00303 Eukaryotic translation initiation factor 3 subunit F [OS=Homo sapiens]	0	FALSE	33.359	29	8	8	29	8	357	37.5	5.45	30.08	8	metabolic process	cytoplasm;cytosol;membrane	catalytic activity;protein binding;RNA binding	Pf01398, Pf13012	8665	ENSG00000280606.3; ENSG00000175390.13	EIF3F	11; CHR_HSCHR11_1_CTG1_2	RNA transport	Formation of the ternary complex, and subsequently, the 43S complex; L13a-mediated translational silencing of Ceruloplasmin expression; Translation initiation complex formation; GTP hydrolysis and joining of the 60S ribosomal subunit; Formation of a pool of free 40S subunits; Ribosomal scanning and start codon recognition	Translation Factors	13	0.709	0.712	2.139	1.74	1.316	1.089	1.343	1.668	75.7	60.1	72	174.5	127.9	90.5	81.7	100.8	116.8	8.62857e+07	6.84342e+07	8.20433e+07
High	Master Protein	P62873	Guanine nucleotide-binding protein G(I)/G(S)/G(T) subunit beta-1 [OS=Homo sapiens]	>ProteinCenter:SwissProt|P62873 Guanine nucleotide-binding protein G(I)/G(S)/G(T) subunit beta-1 [OS=Homo sapiens]	0	FALSE	33.353	24	7	8	48	4	340	37.4	6	39.45	7	cell death;cell organization and biogenesis;cell proliferation;cellular homeostasis;metabolic process;regulation of biological process;response to stimulus	cytosol;membrane	catalytic activity;protein binding;signal transducer activity	Pf00400	2782	ENSG00000078369.17	GNB1	1	Phototransduction; Cholinergic synapse; Alcoholism; Pathways in cancer; Olfactory transduction; Serotonergic synapse; Chemokine signaling pathway; GABAergic synapse; Morphine addiction; Glutamatergic synapse; Dopaminergic synapse; PI3K-Akt signaling pathway; Ras signaling pathway; Retrograde endocannabinoid signaling; Circadian entrainment	G alpha (z) signalling events; Activation of G protein gated Potassium channels; Cooperation of PDCL (PhLP1) and TRiC/CCT in G-protein beta folding; Glucagon-type ligand receptors; Thromboxane signalling through TP receptor; ADP signalling through P2Y purinoceptor 1; Olfactory Signaling Pathway; G beta:gamma signalling through PI3Kgamma; Vasopressin regulates renal water homeostasis via Aquaporin…	Nicotine Activity on Dopaminergic Neurons; Human Thyroid Stimulating Hormone (TSH) signaling pathway; Corticotropin-releasing hormone signaling pathway; Myometrial Relaxation and Contraction Pathways; G Protein Signaling Pathways; Chemokine signaling pathway; Focal Adhesion-PI3K-Akt-mTOR-signaling pathway; Calcium Regulation in the Cardiac Cell; Estrogen signaling pathway	84	0.991	1.223	0.947	1.532	1.063	1.217	1.392	1.798	105.3	101.4	124.7	61.9	66.2	44.7	131.2	82.8	182	1.32777e+08	1.27855e+08	1.5719e+08
High	Master Protein	Q95121	SWISS-PROT:Q95121 (Bos taurus) Pigment epithelium-derived factor precursor	>Q95121 SWISS-PROT:Q95121 (Bos taurus) Pigment epithelium-derived factor precursor	0	TRUE	33.163	35	10	10	24	10	416	46.2	7.05	23.94	10	regulation of biological process	extracellular	enzyme regulator activity	Pf00079	281386	ENSBTAG00000009705.5	SERPINF1	19	Wnt signaling pathway			1	0.607	0.693	0.524	0.607	1.02	0.565	0.366	0.489	160.7	102.3	115.2	83.9	68.8	127.6	100.9	57.9	82.7	1.24135e+08	7.90184e+07	8.89775e+07
High	Master Protein	P10909-1	Clusterin [OS=Homo sapiens]	>ProteinCenter:SwissProt|P10909-1 Clusterin [OS=Homo sapiens]	0	FALSE	33.139	19	9	10	18	9	449	52.5	6.27	23.51	9	cell death;cell organization and biogenesis;cell proliferation;defense response;metabolic process;regulation of biological process;response to stimulus;transport	cell surface;cytoplasm;cytosol;endoplasmic reticulum;extracellular;Golgi;membrane;mitochondrion;nucleus;organelle lumen	catalytic activity;protein binding	Pf01093	1191	ENSG00000120885.21	CLU	8	Complement and coagulation cascades	Platelet degranulation ; Terminal pathway of complement; Antimicrobial peptides; Regulation of Complement cascade	Complement and Coagulation Cascades	12	1.318	1.325	0.014	0.018	0.024	0.029	0.029	0.023	232.7	305.6	336	3	2.7	5.1	6	5.1	3.9	1.83535e+08	2.41059e+08	2.65099e+08
High	Master Protein	O00231	26S proteasome non-ATPase regulatory subunit 11 [OS=Homo sapiens]	>ProteinCenter:SwissProt|O00231 26S proteasome non-ATPase regulatory subunit 11 [OS=Homo sapiens]	0	FALSE	33.114	27	11	11	29	11	422	47.4	6.48	30.07	11	cell differentiation;cell organization and biogenesis;metabolic process;regulation of biological process;response to stimulus;transport	cytoplasm;cytosol;extracellular;membrane;nucleus;organelle lumen;proteasome	catalytic activity;protein binding;structural molecule activity	Pf01399	5717	ENSG00000108671.9	PSMD11	17	Proteasome; Epstein-Barr virus infection	Regulation of RAS by GAPs; CDT1 association with the CDC6:ORC:origin complex; Downstream TCR signaling; UCH proteinases; NIK-->noncanonical NF-kB signaling; Hh mutants that don't undergo autocatalytic processing are degraded by ERAD; SCF-beta-TrCP mediated degradation of Emi1; Neutrophil degranulation; Cross-presentation of soluble exogenous antigens (endosomes); Separation of Sister Chromatids; …	Proteasome Degradation; Parkin-Ubiquitin Proteasomal System pathway	153	0.877	0.752	1.217	1.056	0.768	0.998	0.973	0.846	93.9	142	89.2	108	90.9	73.8	102.6	90.4	109.2	6.03793e+07	9.12806e+07	5.73409e+07
High	Master Protein	Q8TE68-1	Epidermal growth factor receptor kinase substrate 8-like protein 1 [OS=Homo sapiens]	>ProteinCenter:SwissProt|Q8TE68-1 Epidermal growth factor receptor kinase substrate 8-like protein 1 [OS=Homo sapiens]	0	FALSE	33.027	16	10	10	18	10	723	80.2	6.04	20.81	10	regulation of biological process;response to stimulus	cytoplasm;cytosol	protein binding	Pf00018, Pf07653, Pf08416, Pf14604	54869	ENSG00000131037.14	EPS8L1	19				0	2.175	1.628	40.708	39.545	29.482		0.01		1.3	4.9	4.9	306.6	341	237	2.2		1.9	323384	1.23073e+06	1.22729e+06
High	Master Protein	ENSEMBL:ENSBTAP00000016046	(Bos taurus) similar to fibulin-1 C isoform 1	>ENSEMBL:ENSBTAP00000016046 (Bos taurus) similar to fibulin-1 C isoform 1	0	TRUE	32.861	13	8	10	46	7	706	77.4	5.06	44.76	8												0	0.759	0.758	0.496	0.612	0.877	0.649	0.967	0.494	147.9	120.7	125.4	75.6	63.1	115.8	108.9	62.5	80.1	2.07844e+08	1.69626e+08	1.76128e+08
High	Master Protein	P02584	SWISS-PROT:P02584 (Bos taurus) Profilin-1	>P02584 SWISS-PROT:P02584 (Bos taurus) Profilin-1	0	TRUE	32.824	56	7	10	56	3	140	15	8.28	49.29	7	cell organization and biogenesis;regulation of biological process	cytoplasm;cytoskeleton	protein binding	Pf00235	513895	ENSBTAG00000004915.4	PFN1	19	Regulation of actin cytoskeleton; Salmonella infection; Rap1 signaling pathway	RHO GTPases Activate Formins; PCP/CE pathway; Signaling by ROBO receptors		13	0.832	0.726	0.585	0.622	0.763	0.805	0.445	0.451	145.3	152.7	136.8	64.2	39.3	78.7	129.9	44.9	108.2	6.54179e+07	6.87332e+07	6.15952e+07
High	Master Protein	P04792	Heat shock protein beta-1 [OS=Homo sapiens]	>ProteinCenter:SwissProt|P04792 Heat shock protein beta-1 [OS=Homo sapiens]	0	FALSE	32.822	56	10	10	24	10	205	22.8	6.4	19.87	10	cellular component movement;metabolic process;regulation of biological process;response to stimulus	cytoplasm;cytoskeleton;cytosol;membrane;nucleus;proteasome	enzyme regulator activity;protein binding;RNA binding	Pf00011	3315	ENSG00000106211.8	HSPB1	7	MAPK signaling pathway; Amoebiasis; VEGF signaling pathway; Epstein-Barr virus infection	AUF1 (hnRNP D0) binds and destabilizes mRNA; VEGFA-VEGFR2 Pathway; MAPK6/MAPK4 signaling	Apoptosis-related network due to altered Notch3 in ovarian cancer; Fas Ligand (FasL) pathway and Stress induction of Heat Shock Proteins (HSP) regulation; MAPK Signaling Pathway; ATM Signaling Network in Development and Disease; VEGFA-VEGFR2 Signaling Pathway; p38 MAPK Signaling Pathway	19	0.758	1.101	0.679	0.394	0.427	0.429	0.563	0.587	143.1	112	143.7	95.6	88.2	67.4	64.1	122.5	63.5	9.06524e+07	7.09667e+07	9.1083e+07
High	Master Protein	O43175	D-3-phosphoglycerate dehydrogenase [OS=Homo sapiens]	>ProteinCenter:SwissProt|O43175 D-3-phosphoglycerate dehydrogenase [OS=Homo sapiens]	0	FALSE	32.808	21	10	10	40	10	533	56.6	6.71	41.22	10	metabolic process	cytosol	catalytic activity;nucleotide binding	Pf00389, Pf02826	26227	ENSG00000092621.11	PHGDH	1	Glycine, serine and threonine metabolism; Biosynthesis of amino acids; Carbon metabolism; Metabolic pathways	Serine biosynthesis	Trans-sulfuration and one carbon metabolism	9	0.747	0.793	1.478	1.075	0.817	0.966	1.184	1.702	89.9	67.6	74.4	125.9	83.8	73.6	90.2	120.8	173.8	8.85223e+07	6.65605e+07	7.32904e+07
High	Master Protein	P35052	Glypican-1 [OS=Homo sapiens]	>ProteinCenter:SwissProt|P35052 Glypican-1 [OS=Homo sapiens]	0	FALSE	32.728	15	9	9	22	9	558	61.6	7.3	19.78	9	cell differentiation;cellular component movement;metabolic process;regulation of biological process	cytosol;endosome;extracellular;membrane;organelle lumen	metal ion binding;protein binding	Pf01153	2817	ENSG00000063660.8	GPC1	2	Proteoglycans in cancer	Defective B4GALT7 causes EDS, progeroid type; Retinoid metabolism and transport; Defective EXT2 causes exostoses 2; Defective EXT1 causes exostoses 1, TRPS2 and CHDS; Signaling by GPCR; HS-GAG biosynthesis; A tetrasaccharide linker sequence is required for GAG synthesis; Signaling by ROBO receptors; Cell surface interactions at the vascular wall; Defective B3GALT6 causes EDSP2 and SEMDJL1; HS-GAG…	VEGFA-VEGFR2 Signaling Pathway	29	0.853	1.066	0.081	0.074	0.064	0.602	0.486	0.314	226.7	198.8	241.2	13.1	9.1	9.8	98.7	49.1	53.6	6.345e+07	5.56443e+07	6.75192e+07
High	Master Protein	O00429	Dynamin-1-like protein [OS=Homo sapiens]	>ProteinCenter:SwissProt|O00429 Dynamin-1-like protein [OS=Homo sapiens]	0	FALSE	32.665	18	9	9	29	9	736	81.8	6.81	25.48	9	cell death;cell organization and biogenesis;regulation of biological process;response to stimulus;transport	cytoplasm;cytoskeleton;cytosol;endoplasmic reticulum;Golgi;membrane;mitochondrion	catalytic activity;enzyme regulator activity;nucleotide binding;protein binding	Pf00350, Pf01031, Pf02212	10059	ENSG00000087470.17	DNM1L	12	TNF signaling pathway; NOD-like receptor signaling pathway	Apoptotic execution phase	Synaptic Vesicle Pathway	6	0.855	0.947	1.01	0.634	0.843	0.879	0.728	0.787	118.9	110.5	106.3	115.3	62.4	99.6	114.5	98.6	73.8	5.4169e+07	5.03563e+07	4.84253e+07
High	Master Protein	P05106	Integrin beta-3 [OS=Homo sapiens]	>ProteinCenter:SwissProt|P05106 Integrin beta-3 [OS=Homo sapiens]	0	FALSE	32.657	10	8	8	41	8	788	87	5.24	40.6	8	cell differentiation;cell growth;cell organization and biogenesis;cellular component movement;coagulation;regulation of biological process;response to stimulus;transport	cell surface;membrane;nucleus	catalytic activity;protein binding;receptor activity;signal transducer activity	Pf00362, Pf07965, Pf08725	3690	ENSG00000259207.7	ITGB3	17	Dilated cardiomyopathy; Hypertrophic cardiomyopathy (HCM); Proteoglycans in cancer; MicroRNAs in cancer; Arrhythmogenic right ventricular cardiomyopathy (ARVC); ECM-receptor interaction; Phagosome; Platelet activation; Rap1 signaling pathway; PI3K-Akt signaling pathway; Hematopoietic cell lineage; Regulation of actin cytoskeleton; Osteoclast differentiation; Focal adhesion; Thyroid hormone signal…	Integrin cell surface interactions; Signaling by BRAF and RAF fusions; Signal transduction by L1; PECAM1 interactions; MAP2K and MAPK activation; VEGFA-VEGFR2 Pathway; Molecules associated with elastic fibres; GRB2:SOS provides linkage to MAPK signaling for Integrins ; Signaling by RAS mutants; Signaling by high-kinase activity BRAF mutants; Syndecan interactions; Signaling by moderate kinase act…	Osteoclast Signaling; Osteopontin Signaling; Serotonin Transporter Activity; Integrin-mediated Cell Adhesion; Arrhythmogenic Right Ventricular Cardiomyopathy; Primary Focal Segmental Glomerulosclerosis FSGS; Focal Adhesion; Osteoblast Signaling; MFAP5-mediated ovarian cancer cell motility and invasiveness; TGF-beta Signaling Pathway; VEGFA-VEGFR2 Signaling Pathway; Focal Adhesion-PI3K-Akt-mTOR-si…	70	1.142	0.794	0.894	0.979	0.691	0.755	1.008	0.882	99.6	120.3	115.7	56.5	99	94.2	78.2	125.1	111.3	2.29293e+08	2.77066e+08	2.66403e+08
High	Master Protein	O60701	UDP-glucose 6-dehydrogenase [OS=Homo sapiens]	>ProteinCenter:SwissProt|O60701 UDP-glucose 6-dehydrogenase [OS=Homo sapiens]	0	FALSE	32.508	28	11	11	29	11	494	55	7.12	31.97	11	metabolic process	cytosol;nucleus	catalytic activity;nucleotide binding	Pf00984, Pf03720, Pf03721	7358	ENSG00000109814.11	UGDH	4	Pentose and glucuronate interconversions; Ascorbate and aldarate metabolism; Metabolic pathways; Amino sugar and nucleotide sugar metabolism	Formation of the active cofactor, UDP-glucuronate	Glucuronidation	10	0.776	0.729	5.458	4.836	2.92	1.196	2.215	1.08	47.6	37.1	36.3	259.1	172.7	121.6	64	84.3	77.2	4.38255e+07	3.41296e+07	3.34212e+07
High	Master Protein	P35232	Prohibitin [OS=Homo sapiens]	>ProteinCenter:SwissProt|P35232 Prohibitin [OS=Homo sapiens]	0	FALSE	32.382	48	10	10	25	10	272	29.8	5.76	23.03	10	cell differentiation;cell organization and biogenesis;metabolic process;regulation of biological process;response to stimulus;transport	cell surface;cytoplasm;endosome;membrane;mitochondrion;nucleus	DNA binding;protein binding	Pf01145	5245	ENSG00000167085.11	PHB	17		Paradoxical activation of RAF signaling by kinase inactive BRAF; Processing of SMDT1; RAF activation; Signaling by RAS mutants; Signaling by moderate kinase activity BRAF mutants; Interleukin-20 family signaling	Integrated Breast Cancer Pathway	19	1.309	1.105	12.243	21.176	0.635	2.539	11.479	8.337	11.2	20.7	25.4	198.6	258.3	5.6	36.4	196.4	147.5	9.67238e+06	1.78649e+07	2.19536e+07
High	Master Protein	ENSEMBL:ENSBTAP00000034412	(Bos taurus) similar to C4b-binding protein alpha chain	>ENSEMBL:ENSBTAP00000034412 (Bos taurus) similar to C4b-binding protein alpha chain	0	TRUE	32.37	20	5	6	28	5	199	22.3	7.49	33.86	5												0	0.92	0.76	0.809	0.569	0.794	0.769	0.862	0.75	126.7	111.3	105.4	104.3	64.5	102.6	95.7	102.5	86.9	1.91494e+08	1.68244e+08	1.59278e+08
High	Master Protein	Q14689	Disco-interacting protein 2 homolog A [OS=Homo sapiens]	>ProteinCenter:SwissProt|Q14689 Disco-interacting protein 2 homolog A [OS=Homo sapiens]	0	FALSE	32.291	7	11	11	25	7	1571	170.3	8.03	31.55	11	development;metabolic process;regulation of biological process	cell surface;nucleus	catalytic activity;protein binding	Pf00501, Pf06464	23181	ENSG00000160305.17	DIP2A	21			Mesodermal Commitment Pathway	1	0.454	0.615	2.25	2.297	2.587	2.176	2.727	1.537	48.4	30	20.1	130.4	140.5	141	155.1	158.5	76	7.21289e+06	4.47909e+06	2.99663e+06
High	Master Protein	P29692	Elongation factor 1-delta [OS=Homo sapiens]	>ProteinCenter:SwissProt|P29692 Elongation factor 1-delta [OS=Homo sapiens]	0	FALSE	32.271	42	9	11	29	9	281	31.1	5.01	28.05	9	metabolic process;regulation of biological process;response to stimulus	cytoplasm;cytosol;endoplasmic reticulum;nucleus	DNA binding;protein binding;RNA binding;signal transducer activity	Pf00736, Pf10587	1936	ENSG00000104529.17; ENSG00000273594.4	EEF1D	8; CHR_HSCHR8_3_CTG7	Herpes simplex infection	Eukaryotic Translation Elongation	Translation Factors	5	0.708	0.802	2.249	1.769	0.866	1.63	3.003	3.861	58.6	39	45	125.8	104	50.2	90.3	173.5	213.7	6.67584e+07	4.44536e+07	5.12652e+07
High	Master Protein	P05141	ADP/ATP translocase 2 [OS=Homo sapiens]	>ProteinCenter:SwissProt|P05141 ADP/ATP translocase 2 [OS=Homo sapiens]	0	FALSE	32.126	31	10	10	35	4	298	32.8	9.69	35.12	10	regulation of biological process;transport	membrane;mitochondrion;nucleus	protein binding;RNA binding;transporter activity	Pf00153	292	ENSG00000005022.5	SLC25A5	X	Huntington's disease; Parkinson's disease; Calcium signaling pathway; HTLV-I infection; cGMP-PKG signaling pathway	Vpr-mediated induction of apoptosis by mitochondrial outer membrane permeabilization; Regulation of insulin secretion	Electron Transport Chain	15	1.132	1.306	24.725	28.865	0.879	2.194	19.897	13.023	9.2	6.8	13.4	260.8	263.4	8.5	17.5	193.6	126.8	6.92955e+06	5.09238e+06	1.00945e+07
High	Master Protein	Q15084-1	Protein disulfide-isomerase A6 [OS=Homo sapiens]	>ProteinCenter:SwissProt|Q15084-1 Protein disulfide-isomerase A6 [OS=Homo sapiens]	0	FALSE	32.049	22	8	8	23	8	440	48.1	5.08	13.94	8	cellular homeostasis;metabolic process;regulation of biological process;response to stimulus;transport	cytosol;endoplasmic reticulum;membrane;organelle lumen	catalytic activity;protein binding	Pf00085, Pf13098, Pf13848, Pf13899, Pf13905	10130	ENSG00000143870.12	PDIA6	2	Protein processing in endoplasmic reticulum	Post-translational protein phosphorylation; Regulation of Insulin-like Growth Factor (IGF) transport and uptake by Insulin-like Growth Factor Binding Proteins (IGFBPs); XBP1(S) activates chaperone genes	Photodynamic therapy-induced unfolded protein response	9	0.948	1.013	16.76	19.228	2.179	1.794	3.37	4.187	15.2	14.7	17.4	277.9	395	26.4	21	66.1	66.3	7.92071e+06	7.63097e+06	9.04337e+06
High	Master Protein	Q14247-1	Src substrate cortactin [OS=Homo sapiens]	>ProteinCenter:SwissProt|Q14247-1 Src substrate cortactin [OS=Homo sapiens]	0	FALSE	32.021	21	10	10	26	10	550	61.5	5.4	30.04	10	cell organization and biogenesis;cellular component movement;regulation of biological process;transport	cytoplasm;cytoskeleton;cytosol;Golgi;membrane	protein binding	Pf00018, Pf02218, Pf07653, Pf14604	2017	ENSG00000085733.15	CTTN	11	Pathogenic Escherichia coli infection; Bacterial invasion of epithelial cells; Shigellosis; Proteoglycans in cancer; Tight junction	RHO GTPases activate PAKs; Clathrin-mediated endocytosis	Pathogenic Escherichia coli infection; Hepatitis C and Hepatocellular Carcinoma	14	0.57	0.644	8.036	14.019	6.489	2.405	5.933	4.968	15	8.2	11.3	129.8	347	150.7	44.1	104.9	89	1.22719e+07	6.69392e+06	9.19387e+06
High	Master Protein	P61978	Heterogeneous nuclear ribonucleoprotein K [OS=Homo sapiens]	>ProteinCenter:SwissProt|P61978 Heterogeneous nuclear ribonucleoprotein K [OS=Homo sapiens]	0	FALSE	32.006	24	9	9	32	9	463	50.9	5.54	29.35	9	metabolic process;regulation of biological process;response to stimulus	cytoplasm;membrane;nucleus;spliceosomal complex	DNA binding;protein binding;RNA binding	Pf00013, Pf08067, Pf13014, Pf13083	3190	ENSG00000165119.20	HNRNPK	9	Spliceosome; Viral carcinogenesis; Herpes simplex infection; MicroRNAs in cancer	mRNA Splicing - Major Pathway; SUMOylation of RNA binding proteins	mRNA Processing	14	0.708	0.798	5.391	6.257	2.244	1.419	5.821	2.828	28.5	22.9	21.9	248.7	165.2	73.3	56	176.4	107.3	2.30867e+07	1.85384e+07	1.77327e+07
High	Master Protein	P50895	Basal cell adhesion molecule [OS=Homo sapiens]	>ProteinCenter:SwissProt|P50895 Basal cell adhesion molecule [OS=Homo sapiens]	0	FALSE	31.951	26	10	10	22	10	628	67.4	5.81	17.4	10	regulation of biological process;response to stimulus	cell surface;extracellular;membrane	protein binding;receptor activity;signal transducer activity	Pf00047, Pf07679, Pf08205, Pf13895, Pf13927	4059	ENSG00000187244.10	BCAM	19				0	0.903	0.938	7.421	10.881	7.881	1.162	1.43	1.134	14.1	9.1	15.2	202.4	308.8	214	26	88.9	21.6	3.10778e+06	2.0144e+06	3.34328e+06
High	Master Protein	Q05B55	TREMBL:Q05B55 (Bos taurus) Similar to Ig kappa chain C region	>Q05B55 TREMBL:Q05B55 (Bos taurus) Similar to Ig kappa chain C region	0	TRUE	31.601	28	7	7	21	7	240	26.6	6.54	18.24	7				Pf07654, Pf07679, Pf07686, Pf13927	506890		IGK	11				0	0.954	0.723	0.613	0.628	1.042	0.917	0.887	0.63	118.1	131.9	115.2	71.4	67.1	99.1	111	102.8	83.4	6.48519e+08	7.24156e+08	6.32477e+08
High	Master Protein	Q14240-1	eukaryotic initiation factor 4A-II [OS=Homo sapiens]	>ProteinCenter:SwissProt|Q14240-1 eukaryotic initiation factor 4A-II [OS=Homo sapiens]	0	FALSE	31.569	22	7	7	33	1	407	46.4	5.48	31.47	7	metabolic process;regulation of biological process	cytosol	catalytic activity;DNA binding;nucleotide binding;protein binding;RNA binding	Pf00270, Pf00271, Pf04851	1974	ENSG00000156976.16	EIF4A2	3	RNA transport	ISG15 antiviral mechanism; L13a-mediated translational silencing of Ceruloplasmin expression; Translation initiation complex formation; GTP hydrolysis and joining of the 60S ribosomal subunit; Deadenylation of mRNA; Ribosomal scanning and start codon recognition	Translation Factors	19	1.352	1.177	1.213	0.765	1.03	0.98	0.74	1.065	96.6	130.5	113.6	117.1	73.9	99.5	94.6	71.5	102.8	1.774e+07	2.39774e+07	2.0879e+07
High	Master Protein	P30153	serine/threonine-protein phosphatase 2A 65 kDa regulatory subunit A alpha isoform [OS=Homo sapiens]	>ProteinCenter:SwissProt|P30153 serine/threonine-protein phosphatase 2A 65 kDa regulatory subunit A alpha isoform [OS=Homo sapiens]	0	FALSE	31.472	16	9	10	38	9	589	65.3	5.11	29.9	9	cell death;cell organization and biogenesis;metabolic process;regulation of biological process;response to stimulus	chromosome;cytoplasm;cytoskeleton;cytosol;membrane;mitochondrion;nucleus	catalytic activity;enzyme regulator activity;protein binding	Pf02985, Pf13513, Pf13646	5518	ENSG00000105568.17	PPP2R1A	19	AMPK signaling pathway; Tight junction; Dopaminergic synapse; Hepatitis C; mRNA surveillance pathway; Adrenergic signaling in cardiomyocytes; TGF-beta signaling pathway; PI3K-Akt signaling pathway; Oocyte meiosis; Sphingolipid signaling pathway; Long-term depression; Hippo signaling pathway; Chagas disease (American trypanosomiasis)	Glycolysis; Regulation of PLK1 Activity at G2/M Transition; AXIN missense mutants destabilize the destruction complex; PP2A-mediated dephosphorylation of key metabolic factors; APC truncation mutants have impaired AXIN binding; CTLA4 inhibitory signaling; Activated TLR4 signalling; Separation of Sister Chromatids; MASTL Facilitates Mitotic Progression; S37 mutants of beta-catenin aren't phosphory…	Focal Adhesion-PI3K-Akt-mTOR-signaling pathway; Wnt Signaling Pathway and Pluripotency; Glycogen Metabolism	150	0.965	0.997	1.376	1.165	0.907	1.211	1.034	1.899	94.8	87.2	99.7	110.4	95.1	79.6	84.8	100	148.3	1.26239e+08	1.16108e+08	1.32801e+08
High	Master Protein	Q13263	Transcription intermediary factor 1-beta [OS=Homo sapiens]	>ProteinCenter:SwissProt|Q13263 Transcription intermediary factor 1-beta [OS=Homo sapiens]	0	FALSE	31.39	17	9	10	16	9	835	88.5	5.77	14.59	9	cell organization and biogenesis;defense response;metabolic process;regulation of biological process;response to stimulus	chromosome;nucleus	catalytic activity;DNA binding;metal ion binding;protein binding;RNA binding	Pf00628, Pf00643	10155	ENSG00000130726.11	TRIM28	19		Generic Transcription Pathway	Corticotropin-releasing hormone signaling pathway; Mesodermal Commitment Pathway; ATM Signaling Network in Development and Disease	6	0.686	0.602	5.786	2.528	1.377	1.007	1.719	1.603	49.7	37	31.7	298.7	148	62.3	69.7	97.7	105.2	1.22594e+07	9.13436e+06	7.83571e+06
High	Master Protein	P29966	Myristoylated alanine-rich C-kinase substrate [OS=Homo sapiens]	>ProteinCenter:SwissProt|P29966 Myristoylated alanine-rich C-kinase substrate [OS=Homo sapiens]	0	FALSE	31.351	18	6	6	23	6	332	31.5	4.45	30.43	6	cell organization and biogenesis;regulation of biological process	cytoplasm;cytoskeleton;membrane;nucleus	protein binding		4082	ENSG00000277443.2	MARCKS	6	MicroRNAs in cancer; Fc gamma R-mediated phagocytosis	Acetylcholine regulates insulin secretion	Brain-Derived Neurotrophic Factor (BDNF) signaling pathway	7	0.55	0.455	12.574	18.898	11.726	1.07	6.594	3.305	17.8	12.1	6.6	168.4	342.2	188.9	10.1	101.1	52.8	1.55035e+07	1.05663e+07	5.74348e+06
High	Master Protein	Q58D62	SWISS-PROT:Q58D62 (Bos taurus) Fetuin-B precursor	>Q58D62 SWISS-PROT:Q58D62 (Bos taurus) Fetuin-B precursor	0	TRUE	31.298	16	9	10	35	9	387	42.6	5.77	34.22	9	regulation of biological process	extracellular	enzyme regulator activity	Pf00031	504615	ENSBTAG00000017531.4	FETUB	1				0	0.676	0.756	0.553	0.189	0.609	0.681	0.352	0.671	149.4	133.3	143.8	85.7	35.7	102.3	106.1	41.5	102.2	8.11831e+08	7.24338e+08	7.81574e+08
High	Master Protein	Q15262	Receptor-type tyrosine-protein phosphatase kappa [OS=Homo sapiens]	>ProteinCenter:SwissProt|Q15262 Receptor-type tyrosine-protein phosphatase kappa [OS=Homo sapiens]	0	FALSE	31.267	9	9	9	22	9	1439	162	5.9	18.1	9	cell organization and biogenesis;cellular component movement;metabolic process;regulation of biological process;response to stimulus	cell surface;membrane	catalytic activity;protein binding;receptor activity;signal transducer activity	Pf00041, Pf00102, Pf00629, Pf00782, Pf07679, Pf13895, Pf14566	5796	ENSG00000273993.4; ENSG00000152894.14	PTPRK	6; CHR_HSCHR6_1_CTG8		EGFR downregulation		4	0.841	1.107	6.845	8.553	7.142	1.833	1.175	1.327	20.3	19	18.8	216.2	272	222	58.8	39	33.9	6.26507e+06	5.86844e+06	5.80366e+06
High	Master Protein	Q9Y5Y6	suppressor of tumorigenicity 14 protein [OS=Homo sapiens]	>ProteinCenter:SwissProt|Q9Y5Y6 suppressor of tumorigenicity 14 protein [OS=Homo sapiens]	0	FALSE	31.252	10	7	7	27	7	855	94.7	6.55	24.52	7	cell death;cell differentiation;cell organization and biogenesis;metabolic process	extracellular;membrane	catalytic activity;protein binding	Pf00057, Pf00089, Pf00431, Pf01390, Pf02408, Pf09342	6768	ENSG00000149418.10	ST14	11	MicroRNAs in cancer	Formation of the cornified envelope		4	0.693	0.86	1.704	2.316	2.191	0.433	0.715	0.322	88.2	56	82.8	146.6	208.7	201.9	46	41.3	28.5	5.50116e+07	3.4925e+07	5.16306e+07
High	Master Protein	P06241-1	Tyrosine-protein kinase Fyn [OS=Homo sapiens]	>ProteinCenter:SwissProt|P06241-1 Tyrosine-protein kinase Fyn [OS=Homo sapiens]	0	FALSE	31.208	17	11	11	40	5	537	60.7	6.67	44.94	11	cell differentiation;cell organization and biogenesis;cell proliferation;cellular component movement;coagulation;defense response;development;metabolic process;regulation of biological process;response to stimulus;transport	cytoplasm;cytosol;endosome;membrane;mitochondrion;nucleus	catalytic activity;metal ion binding;nucleotide binding;protein binding;signal transducer activity	Pf00017, Pf00018, Pf00069, Pf07653, Pf07714, Pf14604	2534	ENSG00000010810.17	FYN	6	Natural killer cell mediated cytotoxicity; Osteoclast differentiation; Axon guidance; Sphingolipid signaling pathway; Pathogenic Escherichia coli infection; Fc epsilon RI signaling pathway; Focal adhesion; Cholinergic synapse; Phospholipase D signaling pathway; Viral myocarditis; Prion diseases; Measles; T cell receptor signaling pathway; Adherens junction; Platelet activation	SEMA3A-Plexin repulsion signaling by inhibiting Integrin adhesion; Sema3A PAK dependent Axon repulsion; PECAM1 interactions; CRMPs in Sema3A signaling; CTLA4 inhibitory signaling; Interleukin-7 signaling; NCAM signaling for neurite out-growth; Nef and signal transduction; EPH-ephrin mediated repulsion of cells; Nephrin family interactions; Ephrin signaling; EPHA-mediated growth cone collapse; DAP…	Integrin-mediated Cell Adhesion; Leptin signaling pathway; Prolactin Signaling Pathway; IL-7 Signaling Pathway; Pathogenic Escherichia coli infection; B Cell Receptor Signaling Pathway; Interleukin-11 Signaling Pathway; Brain-Derived Neurotrophic Factor (BDNF) signaling pathway; Primary Focal Segmental Glomerulosclerosis FSGS; T-Cell Receptor and Co-stimulatory Signaling; Ectoderm Differentiation…	106	0.85	0.956	0.819	0.962	0.931	25.384	19.224	16.018	13.4	7.2	14.8	7.7	14.1	13.2	335.9	261.9	232	6.00109e+06	3.22596e+06	6.64113e+06
High	Master Protein	P39023	60S ribosomal protein L3 [OS=Homo sapiens]	>ProteinCenter:SwissProt|P39023 60S ribosomal protein L3 [OS=Homo sapiens]	0	FALSE	31.189	20	7	9	19	7	403	46.1	10.18	23.48	7	cell organization and biogenesis;metabolic process;response to stimulus;transport	cytoplasm;cytosol;nucleus;ribosome	protein binding;RNA binding;structural molecule activity	Pf00297	6122	ENSG00000100316.15	RPL3	22	Ribosome	Peptide chain elongation; Eukaryotic Translation Termination; Viral mRNA Translation; L13a-mediated translational silencing of Ceruloplasmin expression; Nonsense Mediated Decay (NMD) independent of the Exon Junction Complex (EJC); Selenocysteine synthesis; Nonsense Mediated Decay (NMD) enhanced by the Exon Junction Complex (EJC); GTP hydrolysis and joining of the 60S ribosomal subunit; Major path…	Cytoplasmic Ribosomal Proteins	34	0.622	0.648	1.814	2.905	1.679	0.759	1.238	1.105	91	77.1	94.4	123.3	110.2	56.3	97.5	123.2	127.1	6.9505e+07	5.88742e+07	7.21204e+07
High	Master Protein	P62491	Ras-related protein Rab-11A [OS=Homo sapiens]	>ProteinCenter:SwissProt|P62491 Ras-related protein Rab-11A [OS=Homo sapiens]	0	FALSE	31.108	37	8	8	45	7	216	24.4	6.57	38.36	8	cell organization and biogenesis;metabolic process;regulation of biological process;response to stimulus;transport	cytoplasm;cytosol;endosome;Golgi;membrane;mitochondrion	catalytic activity;nucleotide binding;protein binding	Pf00025, Pf00071, Pf01926, Pf08477, Pf13401	8766	ENSG00000103769.9	RAB11A	15	Vasopressin-regulated water reabsorption; Endocytosis; Pancreatic secretion; Endocrine and other factor-regulated calcium reabsorption	Translocation of GLUT4 to the plasma membrane; TBC/RABGAPs; VxPx cargo-targeting to cilium; Anchoring of the basal body to the plasma membrane; Vasopressin regulates renal water homeostasis via Aquaporins; RAB geranylgeranylation	VEGFA-VEGFR2 Signaling Pathway	21	0.929	0.826	2.531	2.378	1.628	0.978	0.811	1.032	69.6	63.7	62.4	158.4	180.8	121.2	82.3	76.4	85.3	2.67178e+08	2.44385e+08	2.3959e+08
High	Master Protein	Q16881-1	Thioredoxin reductase 1, cytoplasmic [OS=Homo sapiens]	>ProteinCenter:SwissProt|Q16881-1 Thioredoxin reductase 1, cytoplasmic [OS=Homo sapiens]	0	FALSE	31.088	16	9	9	15	9	649	70.9	7.39	18.14	9	cell proliferation;cellular homeostasis;metabolic process;regulation of biological process;response to stimulus;transport	cytoplasm;cytosol;mitochondrion;nucleus	antioxidant activity;catalytic activity;nucleotide binding;protein binding	Pf00070, Pf00462, Pf02852, Pf07992, Pf13738	7296	ENSG00000198431.15	TXNRD1	12	Selenocompound metabolism; Pyrimidine metabolism	Metabolism of ingested MeSeO2H into MeSeH; Uptake and function of diphtheria toxin; Interconversion of nucleotide di- and triphosphates; TP53 Regulates Metabolic Genes; PPARA activates gene expression; Detoxification of Reactive Oxygen Species; Metabolism of ingested H2SeO4 and H2SeO3 into H2Se	Selenium Micronutrient Network; Selenium Metabolism and Selenoproteins; NRF2 pathway; Oxidative Stress	28	0.599	0.743	3.569	4.885	2.077	1.12	2.156	1.532	45.6	28.1	31	167.8	191.2	116.7	65.4	134.4	119.8	2.50664e+07	1.54164e+07	1.70403e+07
High	Master Protein	Q9NZN4	EH domain-containing protein 2 [OS=Homo sapiens]	>ProteinCenter:SwissProt|Q9NZN4 EH domain-containing protein 2 [OS=Homo sapiens]	0	FALSE	31.084	18	12	12	40	7	543	61.1	6.46	38.09	12	cell organization and biogenesis;coagulation;regulation of biological process;transport	cytoplasm;cytoskeleton;cytosol;endosome;membrane;nucleus	catalytic activity;metal ion binding;nucleotide binding;protein binding	Pf00350, Pf01926, Pf12763	30846	ENSG00000024422.11	EHD2	19	Endocytosis	Factors involved in megakaryocyte development and platelet production	Insulin Signaling	4	1.119	1.891	0.462	2.178	2.299	0.473	0.219	0.282	94.2	115.9	134.5	112	150.9	135.7	85.5	12.7	58.6	2.95945e+07	3.6418e+07	4.22463e+07
High	Master Protein	P00505	Aspartate aminotransferase, mitochondrial [OS=Homo sapiens]	>ProteinCenter:SwissProt|P00505 Aspartate aminotransferase, mitochondrial [OS=Homo sapiens]	0	FALSE	30.99	20	8	8	22	8	430	47.5	9.01	27.24	8	metabolic process;response to stimulus;transport	cell surface;membrane;mitochondrion;organelle lumen	catalytic activity;protein binding;RNA binding	Pf00155	2806	ENSG00000125166.12	GOT2	16	Arginine biosynthesis; Metabolic pathways; Carbon metabolism; Fat digestion and absorption; Arginine and proline metabolism; Biosynthesis of amino acids; Alanine, aspartate and glutamate metabolism; Tyrosine metabolism; Cysteine and methionine metabolism; Phenylalanine, tyrosine and tryptophan biosynthesis; 2-Oxocarboxylic acid metabolism; Phenylalanine metabolism	Gluconeogenesis; Amino acid synthesis and interconversion (transamination); Glyoxylate metabolism and glycine degradation	Alanine and aspartate metabolism; Amino Acid metabolism; Glycolysis and Gluconeogenesis	22	0.779	1.201	16.735	20.438	0.706	2.465	18.074	10.306	9.3	10.6	9.5	207.9	252.7	3.6	36.6	209.1	160.7	4.09806e+06	4.66032e+06	4.1747e+06
High	Master Protein	P47897	glutamine--tRNA ligase [OS=Homo sapiens]	>ProteinCenter:SwissProt|P47897 glutamine--tRNA ligase [OS=Homo sapiens]	0	FALSE	30.943	15	11	11	26	11	775	87.7	7.15	28.74	11	metabolic process;regulation of biological process	cytoplasm;cytosol;organelle lumen	catalytic activity;enzyme regulator activity;nucleotide binding;protein binding	Pf00749, Pf03950, Pf04557, Pf04558	5859	ENSG00000172053.17	QARS	3	Aminoacyl-tRNA biosynthesis; Metabolic pathways	Mitochondrial tRNA aminoacylation; Cytosolic tRNA aminoacylation; SeMet incorporation into proteins		11	0.613	0.629	2.605	1.931	1.342	0.942	2.546	1.511	69.3	58.6	63.8	190.7	134.6	82.4	87.9	111.1	101.7	1.56681e+07	1.32409e+07	1.44158e+07
High	Master Protein	P08237	ATP-dependent 6-phosphofructokinase, muscle type [OS=Homo sapiens]	>ProteinCenter:SwissProt|P08237 ATP-dependent 6-phosphofructokinase, muscle type [OS=Homo sapiens]	0	FALSE	30.872	18	11	11	33	8	780	85.1	7.99	26.52	11	cell organization and biogenesis;cellular homeostasis;metabolic process;regulation of biological process	cytoplasm;cytosol;membrane;nucleus	catalytic activity;metal ion binding;nucleotide binding;protein binding	Pf00365	5213	ENSG00000152556.15	PFKM	12	Metabolic pathways; Glycolysis / Gluconeogenesis; Fructose and mannose metabolism; Central carbon metabolism in cancer; Biosynthesis of amino acids; AMPK signaling pathway; Galactose metabolism; RNA degradation; Pentose phosphate pathway; Carbon metabolism	Glycolysis	Insulin Signaling; Glycolysis and Gluconeogenesis	16	0.709	0.654	1.424	1.186	1.148	0.685	0.836	0.853	112.4	77.7	75.6	172.3	115.7	94.7	71.7	79.8	100.1	2.34505e+07	1.62125e+07	1.57845e+07
High	Master Protein	Q13177	Serine/threonine-protein kinase PAK 2 [OS=Homo sapiens]	>ProteinCenter:SwissProt|Q13177 Serine/threonine-protein kinase PAK 2 [OS=Homo sapiens]	0	FALSE	30.801	24	9	9	25	5	524	58	5.96	27.75	9	cell death;cell organization and biogenesis;cellular component movement;metabolic process;regulation of biological process;response to stimulus	cytoplasm;cytosol;membrane;nucleus	catalytic activity;enzyme regulator activity;nucleotide binding;protein binding	Pf00069, Pf00786, Pf07714, Pf14531	5062	ENSG00000180370.10	PAK2	3	Regulation of actin cytoskeleton; MAPK signaling pathway; Renal cell carcinoma; Ras signaling pathway; Focal adhesion; ErbB signaling pathway; T cell receptor signaling pathway; Axon guidance	Sema3A PAK dependent Axon repulsion; Smooth Muscle Contraction; FCERI mediated MAPK activation; Nef and signal transduction; Ephrin signaling; Generation of second messenger molecules; Regulation of PAK-2p34 activity by PS-GAP/RHG10; Interleukin-12 family signaling; RHO GTPases activate PAKs; Gene and protein expression by JAK-STAT signaling after Interleukin-12 stimulation; Stimulation of the ce…	Integrin-mediated Cell Adhesion; Apoptosis-related network due to altered Notch3 in ovarian cancer; Focal Adhesion; Fas Ligand (FasL) pathway and Stress induction of Heat Shock Proteins (HSP) regulation; TGF-beta Signaling Pathway; MAPK Signaling Pathway; VEGFA-VEGFR2 Signaling Pathway; Regulation of Actin Cytoskeleton	65	0.796	0.896	2.299	2.539	1.403	1.711	1.597	2.666	59.1	25.3	53.9	151.6	146	92.6	102.5	108	161.1	1.10816e+07	4.74055e+06	1.01031e+07
High	Master Protein	Q92743	Serine protease HTRA1 [OS=Homo sapiens]	>ProteinCenter:SwissProt|Q92743 Serine protease HTRA1 [OS=Homo sapiens]	0	FALSE	30.756	21	8	8	24	8	480	51.3	7.83	22.45	8	cell differentiation;cell organization and biogenesis;metabolic process;regulation of biological process	cytoplasm;cytosol;extracellular;membrane	catalytic activity;protein binding	Pf00050, Pf00089, Pf00219, Pf00595, Pf05579, Pf07648, Pf10459, Pf13180, Pf13365	5654	ENSG00000166033.11	HTRA1	10		Degradation of the extracellular matrix		2	1.276	0.889	0.569	0.352	0.753	44.264	33.678	24.622	4.7	5.8	4.6	1.7	1.3	3	407.7	244.9	226.3	1.1866e+07	1.45685e+07	1.14905e+07
High	Master Protein	P53990-1	IST1 homolog [OS=Homo sapiens]	>ProteinCenter:SwissProt|P53990-1 IST1 homolog [OS=Homo sapiens]	0	FALSE	30.742	19	8	9	53	8	364	39.7	5.35	71.86	8	cell division;cell organization and biogenesis;regulation of biological process;transport	chromosome;cytoplasm;cytoskeleton;cytosol;extracellular;nucleus;organelle lumen	protein binding	Pf03398	9798		IST1	16	Endocytosis	Neutrophil degranulation		4	1.005	1.15	0.841	1.493	1.129	4	4.754	2.171	55.7	65.5	98.1	28.1	67.8	48.7	245.8	164.7	125.6	1.32582e+08	1.5591e+08	2.33548e+08
High	Master Protein	P13929-1	Beta-enolase [OS=Homo sapiens]	>ProteinCenter:SwissProt|P13929-1 Beta-enolase [OS=Homo sapiens]	0	FALSE	30.738	18	5	6	33	2	434	47	7.71	24.07	5	metabolic process	cytoplasm;cytosol;membrane	catalytic activity;metal ion binding	Pf00113, Pf03952, Pf13378	2027	ENSG00000108515.17	ENO3	17	RNA degradation; Carbon metabolism; Biosynthesis of amino acids; Glycolysis / Gluconeogenesis; HIF-1 signaling pathway; Metabolic pathways	Gluconeogenesis; Glycolysis	Glycolysis and Gluconeogenesis	12	0.811	0.906	0.778	0.999	1.656	0.744	0.773	0.431	127.6	100.5	95	87	97.8	163.5	88.9	80.1	59.7	1.94999e+07	1.53581e+07	1.451e+07
High	Master Protein	Q9Y678	Coatomer subunit gamma-1 [OS=Homo sapiens]	>ProteinCenter:SwissProt|Q9Y678 Coatomer subunit gamma-1 [OS=Homo sapiens]	0	FALSE	30.559	14	10	10	21	9	874	97.7	5.47	13.81	10	cellular component movement;transport	cytoplasm;cytosol;Golgi;membrane	protein binding;structural molecule activity	Pf01602, Pf08752	22820	ENSG00000181789.14	COPG1	3		COPI-dependent Golgi-to-ER retrograde traffic; COPI-mediated anterograde transport		11	0.747	0.731	5.257	4.339	2.765	1.292	3.046	1.896	43.4	31.8	22.9	226.7	197.8	104.2	61.6	124	87.8	8.58099e+06	6.29432e+06	4.52426e+06
High	Master Protein	Q16777	Histone H2A type 2-C [OS=Homo sapiens]	>ProteinCenter:SwissProt|Q16777 Histone H2A type 2-C [OS=Homo sapiens]	0	FALSE	30.424	36	6	9	52	2	129	14	10.9	43.31	6	regulation of biological process	chromosome;nucleus	DNA binding;protein binding	Pf00125, Pf00808	8338	ENSG00000184260.5	HIST2H2AC	1	Systemic lupus erythematosus; Alcoholism	SIRT1 negatively regulates rRNA expression; UCH proteinases; RMTs methylate histone arginines; Activation of anterior HOX genes in hindbrain development during early embryogenesis; NoRC negatively regulates rRNA expression; Meiotic synapsis; Transcriptional regulation by small RNAs; Meiotic recombination; PRC2 methylates histones and DNA; HDACs deacetylate histones; Formation of the beta-catenin:…		66	0.99	0.89	1.274	0.623	0.48	1.95	0.921	0.643	122.2	99.5	156.5	94.1	34.5	30	234.1	58.4	70.8	5.09461e+08	4.14847e+08	6.52529e+08
High	Master Protein	P46777	60S ribosomal protein L5 [OS=Homo sapiens]	>ProteinCenter:SwissProt|P46777 60S ribosomal protein L5 [OS=Homo sapiens]	0	FALSE	30.347	27	7	8	31	7	297	34.3	9.72	31.19	7	cell organization and biogenesis;metabolic process;regulation of biological process;transport	cytoplasm;cytosol;membrane;nucleus;ribosome	protein binding;RNA binding;structural molecule activity	Pf00861, Pf14204	6125	ENSG00000122406.12	RPL5	1	Ribosome	Peptide chain elongation; Eukaryotic Translation Termination; Viral mRNA Translation; L13a-mediated translational silencing of Ceruloplasmin expression; Nonsense Mediated Decay (NMD) independent of the Exon Junction Complex (EJC); Selenocysteine synthesis; Nonsense Mediated Decay (NMD) enhanced by the Exon Junction Complex (EJC); GTP hydrolysis and joining of the 60S ribosomal subunit; Major path…	Cytoplasmic Ribosomal Proteins	34	0.942	0.871	2.078	1.641	0.981	1.129	2.526	1.77	67.9	65	57.2	135	123.9	68.2	102.1	130.3	150.5	6.56453e+07	6.28235e+07	5.52296e+07
High	Master Protein	Q96GD4	Aurora kinase B [OS=Homo sapiens]	>ProteinCenter:SwissProt|Q96GD4 Aurora kinase B [OS=Homo sapiens]	0	FALSE	30.324	30	9	9	21	8	344	39.3	9.29	23.33	9	cell division;cell organization and biogenesis;cell proliferation;metabolic process;regulation of biological process;response to stimulus	chromosome;cytoplasm;cytoskeleton;cytosol;nucleus	catalytic activity;metal ion binding;nucleotide binding;protein binding	Pf00069, Pf07714	9212	ENSG00000178999.12	AURKB	17		APC/C:Cdh1 mediated degradation of Cdc20 and other APC/C:Cdh1 targeted proteins in late mitosis/early G1; SUMOylation of DNA replication proteins; Amplification of signal from unattached kinetochores via a MAD2 inhibitory signal; Separation of Sister Chromatids; Resolution of Sister Chromatid Cohesion; RHO GTPases Activate Formins; Regulation of TP53 Activity through Phosphorylation	Regulation of Microtubule Cytoskeleton; ATM Signaling Network in Development and Disease	32	0.599	0.47	2.929	2.941	1.227	2.604	4.738	7.15	30.4	13.9	13	115.3	141.6	62.3	108.2	155.4	260.1	8.32297e+06	3.80029e+06	3.55306e+06
High	Master Protein	P31689	DnaJ homolog subfamily A member 1 [OS=Homo sapiens]	>ProteinCenter:SwissProt|P31689 DnaJ homolog subfamily A member 1 [OS=Homo sapiens]	0	FALSE	30.29	22	8	8	24	8	397	44.8	7.08	27.25	8	cellular component movement;metabolic process;regulation of biological process;response to stimulus;transport	cytoplasm;cytoskeleton;cytosol;endoplasmic reticulum;membrane;mitochondrion;nucleus	enzyme regulator activity;metal ion binding;nucleotide binding;protein binding	Pf00226, Pf00684, Pf01556	3301	ENSG00000086061.15	DNAJA1	9	Protein processing in endoplasmic reticulum	HSP90 chaperone cycle for steroid hormone receptors (SHR)	Exercise-induced Circadian Regulation	5	0.928	0.59	0.861	1.177	0.805	0.748	1.061	0.624	101.5	103.1	118.5	90.1	97.6	82.5	103.6	105	98.1	9.84727e+07	1.00025e+08	1.14881e+08
High	Master Protein	P41250	Glycine--tRNA ligase [OS=Homo sapiens]	>ProteinCenter:SwissProt|P41250 Glycine--tRNA ligase [OS=Homo sapiens]	0	FALSE	30.275	19	12	12	27	12	739	83.1	7.03	25.1	12	metabolic process	cytoplasm;cytosol;extracellular;mitochondrion;organelle lumen	catalytic activity;nucleotide binding;protein binding	Pf00458, Pf00587, Pf03129	2617	ENSG00000106105.13	GARS	7	Aminoacyl-tRNA biosynthesis	Mitochondrial tRNA aminoacylation; Cytosolic tRNA aminoacylation		6	0.581	0.596	2.792	2.717	1.325	0.886	2.977	1.587	57.6	35.2	38.3	168.2	136.6	65.2	59.2	196.2	143.4	3.21569e+07	1.96688e+07	2.14168e+07
High	Master Protein	P18085	ADP-ribosylation factor 4 [OS=Homo sapiens]	>ProteinCenter:SwissProt|P18085 ADP-ribosylation factor 4 [OS=Homo sapiens]	0	FALSE	30.182	47	7	8	25	3	180	20.5	7.14	20.71	7	cellular component movement;metabolic process;regulation of biological process;response to stimulus;transport	cytosol;Golgi;membrane	catalytic activity;nucleotide binding;protein binding;signal transducer activity	Pf00025, Pf00071, Pf00503, Pf01926, Pf04670, Pf08477, Pf09439	378	ENSG00000168374.10	ARF4	3		COPI-dependent Golgi-to-ER retrograde traffic; VxPx cargo-targeting to cilium; COPI-mediated anterograde transport		15	0.785	0.539	1.991	2.202	2.01	0.686	1.363	0.689	74.1	59.1	39.9	156	187.8	169.9	50.8	111.1	51.1	1.94133e+07	1.54846e+07	1.04652e+07
High	Master Protein	P62241	40S ribosomal protein S8 [OS=Homo sapiens]	>ProteinCenter:SwissProt|P62241 40S ribosomal protein S8 [OS=Homo sapiens]	0	FALSE	30.021	41	8	8	35	8	208	24.2	10.32	41.27	8	cell organization and biogenesis;metabolic process;transport	cytoplasm;cytosol;endoplasmic reticulum;membrane;nucleus;ribosome	protein binding;RNA binding;structural molecule activity	Pf01201	6202	ENSG00000142937.11	RPS8	1	Ribosome	Peptide chain elongation; Eukaryotic Translation Termination; Viral mRNA Translation; Formation of the ternary complex, and subsequently, the 43S complex; L13a-mediated translational silencing of Ceruloplasmin expression; Selenocysteine synthesis; Nonsense Mediated Decay (NMD) independent of the Exon Junction Complex (EJC); Nonsense Mediated Decay (NMD) enhanced by the Exon Junction Complex (EJC)…	Cytoplasmic Ribosomal Proteins	38	0.772	0.8	2.606	2.532	1.573	1.32	1.633	1.22	75.4	61.7	69.2	120.7	145	92.8	110.6	118.5	106.1	9.30907e+07	7.62149e+07	8.54562e+07
High	Master Protein	P46459	Vesicle-fusing ATPase [OS=Homo sapiens]	>ProteinCenter:SwissProt|P46459 Vesicle-fusing ATPase [OS=Homo sapiens]	0	FALSE	29.906	15	10	10	14	10	744	82.5	6.95	14.55	10	cell organization and biogenesis;metabolic process;regulation of biological process;response to stimulus;transport	cytoplasm;cytosol;membrane	catalytic activity;metal ion binding;nucleotide binding;protein binding;RNA binding	Pf00004, Pf00910, Pf01078, Pf02359, Pf02933, Pf05272, Pf05496, Pf06068, Pf07724, Pf07728, Pf13173, Pf13191, Pf13207, Pf13401	4905	ENSG00000073969.18; ENSG00000278174.3; ENSG00000276262.2	NSF	17; CHR_HSCHR17_1_CTG5; CHR_HSCHR17_2_CTG5	Synaptic vesicle cycle; Vasopressin-regulated water reabsorption; GABAergic synapse	COPI-dependent Golgi-to-ER retrograde traffic; Intra-Golgi traffic; COPII (Coat Protein 2) Mediated Vesicle Transport; COPI-mediated anterograde transport; Retrograde transport at the Trans-Golgi-Network; Trafficking of GluR2-containing AMPA receptors	Synaptic Vesicle Pathway; Brain-Derived Neurotrophic Factor (BDNF) signaling pathway	25	0.978	0.952	0.832	0.854	1.052	0.886	0.945	0.982	116.7	112.7	108.2	114.2	85.4	61.4	107.9	83.3	110.1	3.17775e+07	3.06863e+07	2.94585e+07
High	Master Protein	Q9UJU6-3	Isoform 3 of Drebrin-like protein [OS=Homo sapiens]	>ProteinCenter:SwissProt|Q9UJU6-3 Isoform 3 of Drebrin-like protein [OS=Homo sapiens]	0	FALSE	29.813	19	7	7	20	1	439	49	5.05	24.78	7	cell organization and biogenesis;regulation of biological process;response to stimulus;transport	cytoplasm;cytosol;endosome;extracellular;membrane;organelle lumen	enzyme regulator activity;protein binding	Pf00018, Pf00241, Pf07653, Pf14604	28988	ENSG00000136279.20	DBNL	7			T-Cell antigen Receptor (TCR) Signaling Pathway	1			100	100	100	100	100	100				194.6	235.4	153	58.4	104.3	154.4
High	Master Protein	O15240	Neurosecretory protein VGF [OS=Homo sapiens]	>ProteinCenter:SwissProt|O15240 Neurosecretory protein VGF [OS=Homo sapiens]	0	FALSE	29.789	15	9	9	21	9	615	67.2	4.78	27.99	9	defense response;metabolic process;regulation of biological process;reproduction;response to stimulus;transport	extracellular;organelle lumen	protein binding		7425	ENSG00000128564.6	VGF	7		Post-translational protein phosphorylation; Regulation of Insulin-like Growth Factor (IGF) transport and uptake by Insulin-like Growth Factor Binding Proteins (IGFBPs)		4	1.047	1.371	0.01	0.045	0.037	0.071	0.064	0.04	261.8	254.3	349.6		1.6	1.3	16.3	13	2.2	7.81699e+07	7.59065e+07	1.0436e+08
High	Master Protein	P61026	ras-related protein rab-10 [OS=Homo sapiens]	>ProteinCenter:SwissProt|P61026 ras-related protein rab-10 [OS=Homo sapiens]	0	FALSE	29.766	45	9	9	41	7	200	22.5	8.38	39.1	9	cell differentiation;cell organization and biogenesis;regulation of biological process;response to stimulus;transport	cytosol;endoplasmic reticulum;endosome;Golgi;membrane	catalytic activity;nucleotide binding;protein binding	Pf00025, Pf00071, Pf04670, Pf08477	10890	ENSG00000084733.10	RAB10	2	Endocytosis; AMPK signaling pathway	Translocation of GLUT4 to the plasma membrane; Neutrophil degranulation; RAB GEFs exchange GTP for GDP on RABs; RAB geranylgeranylation	Focal Adhesion-PI3K-Akt-mTOR-signaling pathway	14	0.802	0.692	2.066	2.423	1.665	0.551	0.863	0.826	83.1	61.9	54.3	157.6	211.7	138.8	45.3	80.1	67.1	7.90857e+07	5.89379e+07	5.16939e+07
High	Master Protein	Q15029	116 kDa U5 small nuclear ribonucleoprotein component [OS=Homo sapiens]	>ProteinCenter:SwissProt|Q15029 116 kDa U5 small nuclear ribonucleoprotein component [OS=Homo sapiens]	0	FALSE	29.704	12	9	9	23	8	972	109.4	5	19.85	9	cell organization and biogenesis;metabolic process;response to stimulus	cytosol;membrane;nucleus;spliceosomal complex	catalytic activity;nucleotide binding;protein binding;RNA binding	Pf00009, Pf00679, Pf03144, Pf03764, Pf14492	9343	ENSG00000108883.12	EFTUD2	17	Spliceosome	mRNA Splicing - Major Pathway; mRNA Splicing - Minor Pathway	mRNA Processing	7	0.723	0.857	2.249	1.47	0.963	1.026	1.582	1.724	79.6	62	69.3	152.2	109.5	61	82	149.2	135.1	2.25918e+07	1.76074e+07	1.96905e+07
High	Master Protein	Q9UJU6-1	Drebrin-like protein [OS=Homo sapiens]	>ProteinCenter:SwissProt|Q9UJU6-1 Drebrin-like protein [OS=Homo sapiens]	0	FALSE	29.682	20	7	7	21	1	430	48.2	5.05	26.1	7	cell organization and biogenesis;regulation of biological process;response to stimulus;transport	cytoplasm;cytoskeleton;cytosol;endosome;extracellular;Golgi;membrane;organelle lumen	enzyme regulator activity;protein binding	Pf00018, Pf00241, Pf07653, Pf14604	28988	ENSG00000136279.20	DBNL	7		Neutrophil degranulation; Caspase-mediated cleavage of cytoskeletal proteins; Neurexins and neuroligins	T-Cell antigen Receptor (TCR) Signaling Pathway	12	0.01	0.01	14.73	23.462	12.012	4.459	0.01	8.542	14			206.5	328.9	168.4	62.5		119.7	302666
High	Master Protein	O00192	armadillo repeat protein deleted in velo-cardio-facial syndrome [OS=Homo sapiens]	>ProteinCenter:SwissProt|O00192 armadillo repeat protein deleted in velo-cardio-facial syndrome [OS=Homo sapiens]	0	FALSE	29.661	11	8	8	30	8	962	104.6	6.81	14.59	8	development	cytoplasm;membrane;nucleus	protein binding	Pf00514, Pf13646	421	ENSG00000099889.13	ARVCF	22				0	0.843	0.644	13.883	15.803	11.565	0.187	0.193	0.359	14.7	11.6	8.3	260.6	352	248.1	1.4	1.5	1.7	3.10483e+06	2.45333e+06	1.75538e+06
High	Master Protein	Q6ZNJ1-1	Neurobeachin-like protein 2 [OS=Homo sapiens]	>ProteinCenter:SwissProt|Q6ZNJ1-1 Neurobeachin-like protein 2 [OS=Homo sapiens]	0	FALSE	29.661	4	9	9	28	9	2754	302.3	6.38	26.59	9	cell differentiation;transport	endoplasmic reticulum;membrane	protein binding	Pf00400, Pf02138, Pf13385, Pf14844	23218	ENSG00000160796.16	NBEAL2	3		Neutrophil degranulation		3	0.944	0.878	0.641	0.477	0.856	0.881	0.473	0.569	131.5	123	140.2	84.6	46.1	127.2	124.7	45.5	77.1	5.89183e+07	5.51036e+07	6.2793e+07
[truncated: 2,648 more rows]
[truncated: 44 more columns]
