# Supplementary material for: Characterisation of Colorectal Cancer Cell Lines through Proteomic Profiling of Their Extracellular Vesicles
Source: Proteomes. 2023 Jan 11;11(1):3. doi: 10.3390/proteomes11010003 (PMC9844407; doi:10.3390/proteomes11010003)
Supplement: Supplementary file 1 [file proteomes-11-00003-s001.zip › Table S3.xlsx]

## Sheet: Figure 2B Shared Small-EVs 
Figure 2B Shared Small-EVs (531 proteins)
Annotation Cluster 1	Enrichment Score: 75.37862812260433
Category	Term	PValue	Genes	Fold Enrichment	Benjamini
GOTERM_CC_DIRECT	GO:0005913~cell-cell adherens junction	3.137730704075028E-83	P46940, Q01082, Q7L1Q6, Q9UHD8, O14908, Q9BR76, O00571, P29692, P37802, Q9H444, P55196, P07737, P11142, O60716, P15151, Q9UNF0, P61313, Q99497, O75955, Q7Z2W4, P04083, Q9Y490, P05556, Q8IZP0, Q04637, O00567, O75369, P28072, Q15599, Q15149, O00299, P08238, P62258, Q02878, P63244, Q9UGI8, P18206, Q01813, P61026, Q14160, P04075, P54136, P35222, P30041, Q9H223, Q7KZF4, P50990, P11021, P53990, P07948,…	11.390665342601789	5.94077013304872E-81
GOTERM_MF_DIRECT	GO:0098641~cadherin binding involved in cell-cell adhesion	7.371682115408412E-82	P46940, Q01082, Q7L1Q6, Q9UHD8, O14908, Q9BR76, O00571, P29692, P37802, Q9H444, P55196, P07737, P11142, O60716, Q9UNF0, P61313, Q99497, Q7Z2W4, P04083, Q9Y490, P05556, Q8IZP0, Q04637, O00567, O75369, P28072, Q15599, Q15149, O00299, P08238, P62258, Q02878, P63244, Q9UGI8, P18206, Q01813, P61026, Q14160, P04075, P54136, P35222, P16422, P30041, Q9H223, Q7KZF4, P50990, P11021, P53990, Q07157, P63104,…	11.487430478309232	5.75728373213397E-79
GOTERM_BP_DIRECT	GO:0098609~cell-cell adhesion	3.1617925044412214E-63	P60228, P46940, P07355, Q01082, Q7L1Q6, Q9UHD8, P31947, P06733, O14908, P29692, Q9BR76, O00571, Q9H444, P37802, Q9Y6W5, P31946, Q9H4M9, P55196, P07737, P11142, P62424, P31949, P62826, Q9UNF0, Q9Y265, P61313, Q99497, P15880, Q7Z2W4, Q15019, Q04637, Q8IZP0, O00567, O75369, P28072, Q15599, Q15149, P08238, P47756, P62258, Q02878, P63244, Q14847, Q15365, Q16181, Q9UGI8, P29317, Q01813, P61026, P04075,…	10.268170795993672	8.571619479540151E-60
Annotation Cluster 2	Enrichment Score: 23.48138655820289
Category	Term	PValue	Genes	Fold Enrichment	Benjamini
GOTERM_BP_DIRECT	GO:0006413~translational initiation	1.5782726701456078E-41	P60228, P36578, B5ME19, Q07020, P27635, P62753, P08865, P62280, P62424, P62269, P61247, P62266, P62829, O00303, P61313, P62263, P23396, P62851, P15880, Q02543, Q04637, P60842, Q13347, P11940, P62917, O15371, Q02878, P39023, P18124, P46776, P46777, P46778, P35268, P46779, Q9UKV8, P30050, P61221, P62249, P84098, P62906, P62241, P62701, P46781, P05388, Q14152, P55884, P50914, P05198, P26373, Q9Y3U8,…	12.140201598887732	2.1393486043823714E-38
GOTERM_BP_DIRECT	GO:0000184~nuclear-transcribed mRNA catabolic process, nonsense-mediated decay	4.318287531022718E-37	P60228, P36578, P18124, P46776, P46777, P35268, P46778, P46779, P30153, Q07020, P27635, P62753, P08865, P30050, P62280, P62249, P62424, P62269, P84098, P62906, P61247, P62266, P62241, P62829, P61313, P15170, P38919, P62263, Q92900, P23396, P62851, P46781, P62701, P15880, Q02543, P05388, P62495, Q04637, P11940, P62917, Q02878, P50914, P26373, Q9Y3U8, P39023, P62847	12.363857543017208	3.9022924988675295E-34
GOTERM_BP_DIRECT	GO:0006614~SRP-dependent cotranslational protein targeting to membrane	1.9811016924414427E-31	P36578, P18124, P46776, P46777, P35268, P46778, P46779, Q07020, P62753, P27635, P08865, P30050, P62280, P62249, P62424, P62269, P84098, P62266, P61247, P62906, P62241, P62829, P61313, P62263, P23396, P62851, P62701, P46781, P15880, Q02543, P05388, P62917, Q02878, P50914, Q9Y3U8, P26373, P39023, P62847	12.93001013171226	1.3426916720521877E-28
GOTERM_BP_DIRECT	GO:0019083~viral transcription	3.4484038942181365E-28	P36578, P18124, P46776, P46777, P35268, P46778, P46779, Q07020, P62753, P27635, P08865, P30050, P62280, P62249, P62424, P62269, P84098, P62266, P61247, P62906, P62241, P62829, P61313, P62263, P23396, P62851, P62701, P46781, P15880, Q02543, P05388, P62917, Q02878, P50914, Q9Y3U8, P26373, P39023, P62847	10.851972789115646	1.8697245914450738E-25
GOTERM_CC_DIRECT	GO:0005840~ribosome	1.3651307567743783E-23	P36578, P18124, P46776, P46777, P35268, P46778, P46779, Q07020, P62753, P27635, P62280, P62249, P62424, P62269, P84098, P62906, P61247, P62266, P62241, P62829, P61313, P62263, P23396, P62851, P62701, P46781, P15880, Q02543, P51812, P05388, Q92616, P62917, Q02878, P05198, P50914, Q9Y3U8, P26373, P39023, P62847	8.078381450329621	7.753942698478468E-22
GOTERM_BP_DIRECT	GO:0006364~rRNA processing	5.143235606034657E-22	P36578, P18124, P46776, P46777, P35268, P46778, P46779, Q07020, P62753, P27635, P08865, P30050, P62280, P62249, P62424, P62269, P84098, P61247, P62906, P62266, Q9UQ80, P62241, P62829, P61313, P38919, P62263, P23396, P62851, P62701, P46781, P15880, Q02543, P05388, O00567, P22087, Q9NU22, P62917, Q02878, P50914, Q9Y3U8, P26373, P39023, P62847	6.426844681797954	2.3238852879933256E-19
GOTERM_BP_DIRECT	GO:0006412~translation	1.0887347951332431E-21	P36578, P18124, P46776, P46777, P14868, P35268, P46778, P46779, Q9UKV8, Q07020, Q15029, P62753, P27635, P08865, P30050, P62280, P62249, P62424, P62269, P84098, P61247, P62906, P62266, P62241, P62829, P61313, P62263, P23396, P62851, P62701, P46781, P15880, Q02543, P05388, P26639, Q92616, Q04637, Q9NSD9, P62917, Q02878, P50914, Q9Y3U8, P26373, P39023, P23381, P62847	5.815411255411256	4.2165143280088887E-19
GOTERM_CC_DIRECT	GO:0022625~cytosolic large ribosomal subunit	1.0793513761284057E-17	P36578, P18124, Q02543, P46776, P46777, P35268, P46778, P46779, P05388, Q07020, P27635, P30050, P62424, P84098, P62917, Q02878, P62906, P62829, P50914, P61313, P26373, Q9Y3U8, P39023	11.630188679245283	4.715935243391804E-16
GOTERM_MF_DIRECT	GO:0003735~structural constituent of ribosome	2.8138705547621917E-16	P36578, P18124, P46776, P46777, P35268, P46778, P46779, Q07020, P62753, P27635, P08865, P30050, P62280, P62249, P62424, P62269, P84098, P62266, P61247, P62906, P62241, P62829, P61313, P62263, P23396, P62701, P46781, P15880, Q02543, P05388, P62917, Q02878, P50914, Q9Y3U8, P26373, P39023, P62847	5.338709677419354	5.206945985491984E-14
GOTERM_MF_DIRECT	GO:0003723~RNA binding	1.44058862501538E-14	P36578, P47897, Q07020, O00571, P12268, P62424, P62269, P61247, P61313, Q00839, P62263, P23396, P62851, P15880, Q02543, P22626, Q13247, P62495, Q04637, O00567, Q9NUU7, P06748, P22087, Q07955, P11940, Q9NSD9, P62917, O15371, Q02878, Q15365, P63241, P39023, P18124, P25786, P46776, P46777, P46778, P35268, P46779, P62249, P14625, P84098, P62906, Q92945, Q6P2Q9, Q92900, P62701, P52272, P26639, Q14152,…	3.2793536592557646	1.252442594079639E-12
GOTERM_CC_DIRECT	GO:0022627~cytosolic small ribosomal subunit	3.253790988456307E-12	P15880, O00571, P62753, P08865, P62280, P62249, P62269, P61247, P62266, P62241, P23396, P62263, P62851, P62701, P62847, P46781	11.461635220125787	9.240908038776752E-11
Annotation Cluster 3	Enrichment Score: 11.756072178905056
Category	Term	PValue	Genes	Fold Enrichment	Benjamini
GOTERM_MF_DIRECT	GO:0003924~GTPase activity	2.4982948574765417E-16	P07437, Q71U36, Q9UHD8, P60953, P62070, P61026, P51153, Q15286, P61006, O00571, Q15029, P61020, P68371, P61106, P11234, P62873, P68366, O00429, P62826, P20340, P15170, P29992, P61224, P08754, Q9UL25, P23258, P51149, P62491, P51148, P63000, Q14344, P20339, P13639, P61586, Q92930, P62330, P01116, P41091	5.201819685690654	4.3298697960381105E-14
GOTERM_MF_DIRECT	GO:0005525~GTP binding	8.734854476575197E-16	P07437, Q9Y6G9, Q71U36, Q9UHD8, P60953, P62070, P61026, P51153, Q15286, P61006, Q15029, P61020, Q9NZN4, Q9H4M9, P68371, P08133, Q9H223, P07900, P61106, P11234, P68366, O00429, P20340, P62826, P61225, P15170, P29992, P61224, P08754, Q9UL25, Q15019, P23258, P51149, P62491, Q9NTK5, P51148, P63000, Q14344, P20339, P08238, P13639, P61586, Q92930, P62330, P01116, Q92599, P41091, Q16181	4.004032258064516	1.155742168634788E-13
GOTERM_MF_DIRECT	GO:0019003~GDP binding	4.451707854814328E-12	P08754, Q9Y6G9, Q9UL25, P61026, Q15286, P61006, P51149, P61020, P51148, P61106, P20339, P11234, Q92930, P62826, P01116, P61225, P61224	10.084229390681005	2.8972890753209413E-10
GOTERM_BP_DIRECT	GO:0007264~small GTPase mediated signal transduction	9.733863696817282E-6	P60953, Q9UL25, P62070, P61026, P51153, Q15286, Q96N67, P61006, P62491, P51149, P61020, P51148, P63000, P61106, P20339, P61586, Q92930, P62330, P62826, P20340, P01116, Q8N392, P61224	2.990445218737902	4.5487294347190677E-4
Annotation Cluster 4	Enrichment Score: 11.358271090715224
Category	Term	PValue	Genes	Fold Enrichment	Benjamini
GOTERM_CC_DIRECT	GO:0000502~proteasome complex	2.2668723361761314E-20	P43686, P35998, P25788, Q13200, P25789, P25786, P25787, Q99460, Q99436, P62195, P28072, Q16186, P28070, P17980, Q15008, P62333, O00231, P49721, P55072, P04792, P62191, O00232, P28066, Q16401	13.753962264150942	1.1705304426800387E-18
GOTERM_BP_DIRECT	GO:0043488~regulation of mRNA stability	3.6695475181741193E-20	P35998, P43686, P25788, Q13200, P25789, P25786, P25787, Q99460, P31946, P62195, Q99436, P11142, P17980, Q92945, P28066, Q16401, P63104, Q92973, Q04637, P11940, P28072, P28070, P0DMV8, Q15008, P62333, P49721, O00231, P62191, P04792, O00232	9.315950069348126	1.2435179152212548E-17
GOTERM_BP_DIRECT	GO:0060071~Wnt signaling pathway, planar cell polarity pathway	2.9634387927220087E-18	P35998, P43686, Q13200, P25788, P25789, P25786, P60953, P25787, Q99460, P63010, P62195, Q99436, P07737, P17980, Q00610, Q16401, P28066, P63000, P28072, P28070, P61586, Q15008, P62333, O00231, P49721, P62191, O00232	9.386832298136646	8.926536185632628E-16
GOTERM_BP_DIRECT	GO:0006521~regulation of cellular amino acid metabolic process	1.615783547532675E-17	P43686, P35998, P25788, Q13200, P25789, P25786, P25787, Q99460, P62195, Q99436, P28072, P28070, Q15008, P17980, P62333, O00231, P49721, P62191, O00232, P28066, Q16401	13.170196078431372	4.380389197361082E-15
GOTERM_BP_DIRECT	GO:0002479~antigen processing and presentation of exogenous peptide antigen via MHC class I, TAP-dependent	1.2386766204537863E-16	P43686, P35998, P25788, Q13200, P25789, P25786, P25787, Q99460, P62195, Q99436, P28072, P06756, P28070, Q15008, P17980, P62333, O00231, P49721, P62191, O00232, P28066, Q16401	11.169281934996219	2.731148640577885E-14
GOTERM_BP_DIRECT	GO:0038061~NIK/NF-kappaB signaling	5.800152651999848E-15	P43686, P35998, P25788, Q13200, P25789, P25786, P25787, Q99460, P62195, Q99436, P28072, P28070, Q15008, P17980, P62333, O00231, P49721, P62191, O00232, P28066, Q16401	10.176969696969696	1.2039258479035198E-12
GOTERM_BP_DIRECT	GO:0051436~negative regulation of ubiquitin-protein ligase activity involved in mitotic cell cycle	2.758435414662222E-14	P43686, P35998, P25788, Q13200, P25789, P25786, P25787, Q99460, P62195, Q99436, P28072, P28070, Q15008, P17980, P62333, O00231, P49721, P62191, O00232, P28066, Q16401	9.460281690140846	5.331624031157389E-12
GOTERM_BP_DIRECT	GO:0051437~positive regulation of ubiquitin-protein ligase activity involved in regulation of mitotic cell cycle transition	1.1527458081585715E-13	P43686, P35998, P25788, Q13200, P25789, P25786, P25787, Q99460, P62195, Q99436, P28072, P28070, Q15008, P17980, P62333, O00231, P49721, P62191, O00232, P28066, Q16401	8.837894736842106	2.08278949642704E-11
GOTERM_CC_DIRECT	GO:0022624~proteasome accessory complex	1.1758887666893752E-13	P35998, P43686, Q13200, P17980, Q15008, P62333, Q99460, O00231, P62191, O00232, Q16401, P62195	24.271698113207545	4.1737724387758135E-12
GOTERM_BP_DIRECT	GO:0002223~stimulatory C-type lectin receptor signaling pathway	1.1768333351168983E-13	P43686, P35998, P25788, Q13200, P25789, P25786, P25787, P61088, Q99460, Q99436, P62195, P28072, P28070, Q15008, P17980, P62333, P01116, O00231, P49721, P62191, O00232, P28066, P07948, Q16401	7.310802721088435	1.994004961147766E-11
GOTERM_BP_DIRECT	GO:0031145~anaphase-promoting complex-dependent catabolic process	2.569286362634709E-13	P43686, P35998, P25788, Q13200, P25789, P25786, P25787, Q99460, P62195, Q99436, P28072, P28070, Q15008, P17980, P62333, O00231, P49721, P62191, O00232, P28066, Q16401	8.502278481012658	3.869282672042118E-11
GOTERM_BP_DIRECT	GO:0090263~positive regulation of canonical Wnt signaling pathway	1.77390418816225E-11	Q96QK1, P43686, P35998, P25788, Q13200, P25789, P25786, P25787, Q99460, Q99436, P62195, P28072, P28070, Q13418, Q15008, P17980, P62333, O00231, P49721, P62191, O00232, P28066, Q16401	6.130412698412699	2.531079790202284E-9
GOTERM_BP_DIRECT	GO:0038095~Fc-epsilon receptor signaling pathway	5.477297997245478E-11	P43686, P35998, P25788, Q13200, P25789, P25786, P25787, P61088, Q99460, P63000, Q99436, P62195, P62158, P28072, P28070, P28482, Q15008, P17980, P62333, P01116, P49721, O00231, P62191, P28066, O00232, P07948, Q16401	4.851621187800963	7.424475256812002E-9
GOTERM_BP_DIRECT	GO:0033209~tumor necrosis factor-mediated signaling pathway	9.204021689108566E-11	P43686, P35998, P25788, Q13200, P25789, P25786, Q9BRA2, P25787, Q99460, Q99436, P62195, P28072, P28070, Q15008, P17980, P62333, O00231, P49721, P62191, O00232, P28066, Q16401	5.963260694108151	1.1881959749437954E-8
GOTERM_CC_DIRECT	GO:0008540~proteasome regulatory particle, base subcomplex	2.1377381848534473E-10	P35998, P43686, Q13200, P17980, P62333, Q99460, P62191, Q16401, P62195	25.78867924528302	4.670134834405815E-9
GOTERM_BP_DIRECT	GO:0050852~T cell receptor signaling pathway	1.1951116075122985E-9	P43686, P35998, P25788, Q13200, P25789, P25786, P25787, P61088, Q99460, Q99436, P62195, P28072, P28070, Q15008, P28482, P17980, P62333, O00231, P49721, P62191, O00232, P28066, Q16401	4.970604890604891	1.1999804672147008E-7
GOTERM_BP_DIRECT	GO:0000209~protein polyubiquitination	3.1584741095316616E-9	P43686, P35998, P25788, Q13200, P25789, P25786, P25787, P29144, Q99460, Q7Z6Z7, Q99436, P62195, P28072, P28070, Q96PU5, P55786, Q15008, P17980, P62333, P49721, O00231, P62191, P28066, Q16401, O00232	4.34575569358178	3.0580793297652065E-7
GOTERM_BP_DIRECT	GO:0043161~proteasome-mediated ubiquitin-dependent protein catabolic process	4.924086165878131E-9	P43686, P35998, P25788, Q13200, P25789, P25786, P25787, Q99460, Q9Y5K6, P35222, Q99436, P62195, O00308, P28072, P28070, Q96PU5, Q15008, P17980, P62333, P49721, O00231, P55072, P62191, P28066, O00232, Q16401	4.096570490265072	4.6031705114302213E-7
GOTERM_BP_DIRECT	GO:0000165~MAPK cascade	1.4345255027254032E-8	P35998, P43686, P25788, Q13200, Q01082, P25789, P25786, P25787, Q02750, Q99460, P31946, Q14644, P62195, P62158, Q99436, Q99683, P17980, P28482, P28066, Q16401, P28072, P28070, Q15008, P62333, P01116, O00231, P49721, P62191, O00232	3.5402980734278446	1.2153113408963634E-6
GOTERM_BP_DIRECT	GO:0090090~negative regulation of canonical Wnt signaling pathway	3.8121835815458774E-8	P43686, P35998, P25788, Q13200, P25789, P25786, P25787, Q99460, Q99436, P62195, P28072, P28070, O60716, Q15008, P17980, P62333, O00231, P49721, P62191, O00232, P28066, Q16401	4.316961729477066	3.131761726948845E-6
GOTERM_CC_DIRECT	GO:0005839~proteasome core complex	6.973760955984956E-8	P25788, P28072, P25789, P25786, P28070, P25787, P49721, P28066, Q99436	14.736388140161724	9.902736002320722E-7
GOTERM_MF_DIRECT	GO:0004298~threonine-type endopeptidase activity	1.1989869135139794E-7	P25788, P28072, P25789, P25786, P28070, P25787, P49721, P28066, Q99436	13.72811059907834	5.202257775227537E-6
GOTERM_CC_DIRECT	GO:0019773~proteasome core complex, alpha-subunit complex	4.478128409286783E-5	P25788, P25789, P25786, P25787, P28066	21.49056603773585	3.7399385428282805E-4
GOTERM_BP_DIRECT	GO:0051603~proteolysis involved in cellular protein catabolic process	1.0707483673567232E-4	P25788, P28072, P25789, P25786, P28070, P25787, P11021, P49721, Q99436	5.997142857142857	0.003968753247756918
Annotation Cluster 5	Enrichment Score: 7.261893490405922
Category	Term	PValue	Genes	Fold Enrichment	Benjamini
GOTERM_MF_DIRECT	GO:0051082~unfolded protein binding	3.2772616754680614E-13	P40227, P78371, P17987, Q9Y230, O60884, P50454, P68371, P06748, Q12931, Q99832, P49368, P07900, P11142, P08238, P14625, P23284, P10809, P50502, P0DMV8, Q9NU22, P48643, P50990, P11021, P50991	6.988856304985338	2.5596302855035447E-11
GOTERM_BP_DIRECT	GO:1904874~positive regulation of telomerase RNA localization to Cajal body	1.1103564785250754E-10	P49368, P40227, P78371, P17987, P48643, P50990, P50991, Q9Y230, Q9Y265, Q99832	21.323174603174603	1.36826171504012E-8
GOTERM_BP_DIRECT	GO:1904871~positive regulation of protein localization to Cajal body	2.1572101744384784E-10	P49368, P40227, P78371, P17987, P48643, P50990, P50991, Q99832	31.984761904761907	2.3392784598286198E-8
GOTERM_CC_DIRECT	GO:0005832~chaperonin-containing T-complex	5.716414473196919E-10	P49368, P40227, P78371, P17987, P48643, P50990, P50991, Q99832	30.564360587002096	1.2025641260571263E-8
GOTERM_BP_DIRECT	GO:0050821~protein stabilization	8.229440281712122E-9	P04406, P40227, Q14254, P78371, P17987, P21333, Q99832, P49368, P07737, P07900, P35232, P08238, P23284, P10809, P0DMV8, P48643, Q7Z5G4, P50990, P50991, Q99497, Q99623	4.938823529411764	7.436668095772703E-7
GOTERM_BP_DIRECT	GO:0006457~protein folding	1.0039864989837882E-8	P08754, O75347, P30101, P40227, P49588, P78371, P17987, P67870, Q9Y230, O60884, P68400, Q12931, Q99832, P49368, P07900, P11142, P62873, Q14697, P08238, P14625, P50502, P48643, P50990, P50991	4.264634920634921	8.780020012144618E-7
GOTERM_CC_DIRECT	GO:0002199~zona pellucida receptor complex	4.536344852337486E-8	P49368, P78371, P17987, P48643, P50990, P50991, Q99832	26.743815513626835	6.606777140927278E-7
GOTERM_BP_DIRECT	GO:1904851~positive regulation of establishment of protein localization to telomere	6.960762615607537E-8	P40227, P78371, P17987, P48643, P50990, P50991, Q99832	24.87703703703704	5.391593492332092E-6
GOTERM_CC_DIRECT	GO:0044297~cell body	2.1909241284453843E-7	P07437, P17987, P78371, P46779, P62753, Q99832, P49368, P62873, P15311, P48643, P50990, P50991, Q99497	7.095297993411202	2.8282801856072126E-6
GOTERM_BP_DIRECT	GO:0032212~positive regulation of telomere maintenance via telomerase	3.8718446481923396E-7	P49368, P40227, P78371, P17987, P48643, P28482, P50990, P50991, P35222, Q99832	9.995238095238097	2.5601069539193944E-5
GOTERM_BP_DIRECT	GO:1901998~toxin transport	1.0522710941271402E-4	P49368, P78371, P17987, P48643, P50990, P50991, P11021, Q99832	7.107724867724868	0.003954461882629379
GOTERM_BP_DIRECT	GO:0007339~binding of sperm to zona pellucida	6.739441371346391E-4	P49368, P78371, P17987, P48643, P50990, P50991, Q99832	6.396952380952382	0.019460606307761585
GOTERM_BP_DIRECT	GO:0090666~scaRNA localization to Cajal body	0.0055928998987121795	P78371, P17987, P50991	23.98857142857143	0.11900875694179103
Annotation Cluster 6	Enrichment Score: 6.830199851551401
Category	Term	PValue	Genes	Fold Enrichment	Benjamini
GOTERM_BP_DIRECT	GO:0006096~glycolytic process	5.3696969457822513E-8	P07738, P60174, P04406, P36871, P13929, P18669, P00558, P04075, P00338, P06733, P06744	10.348011204481791	4.2815345996372045E-6
GOTERM_BP_DIRECT	GO:0006094~gluconeogenesis	7.421382933867133E-8	P07738, P60174, P04406, P40926, P36871, P13929, P18669, P00558, P17174, P04075, P06733, P06744	8.723116883116884	5.437652748629951E-6
GOTERM_BP_DIRECT	GO:0061621~canonical glycolysis	8.10897251501566E-7	P60174, P04406, Q01813, P13929, P18669, P00558, P04075, P06733, P06744	11.071648351648351	4.778893068169143E-5
Annotation Cluster 7	Enrichment Score: 5.953565390902033
Category	Term	PValue	Genes	Fold Enrichment	Benjamini
GOTERM_CC_DIRECT	GO:0022624~proteasome accessory complex	1.1758887666893752E-13	P35998, P43686, Q13200, P17980, Q15008, P62333, Q99460, O00231, P62191, O00232, Q16401, P62195	24.271698113207545	4.1737724387758135E-12
GOTERM_CC_DIRECT	GO:0008540~proteasome regulatory particle, base subcomplex	2.1377381848534473E-10	P35998, P43686, Q13200, P17980, P62333, Q99460, P62191, Q16401, P62195	25.78867924528302	4.670134834405815E-9
GOTERM_CC_DIRECT	GO:0031595~nuclear proteasome complex	1.550224387287918E-8	P35998, P43686, P17980, P62333, P62191, O00232, P62195	30.08679245283019	2.589786299855845E-7
GOTERM_BP_DIRECT	GO:0045899~positive regulation of RNA polymerase II transcriptional preinitiation complex assembly	6.960762615607537E-8	P35998, P43686, P17980, P62333, P62191, Q86VP6, P62195	24.87703703703704	5.391593492332092E-6
GOTERM_MF_DIRECT	GO:0036402~proteasome-activating ATPase activity	1.6855705831293539E-7	P35998, P43686, P17980, P62333, P62191, P62195	32.03225806451613	6.582132019428144E-6
GOTERM_CC_DIRECT	GO:0031597~cytosolic proteasome complex	4.517070423311773E-6	P35998, P43686, P17980, P62333, P62191, P62195	20.630943396226414	4.75118674818642E-5
GOTERM_CC_DIRECT	GO:0005838~proteasome regulatory particle	8.083469538011603E-6	Q13200, Q15008, Q99460, P62191, O00232, P62195	18.75540308747856	8.198644705115221E-5
GOTERM_MF_DIRECT	GO:0017025~TBP-class protein binding	3.237948897813481E-5	P35998, P43686, P17980, P62333, P62191, Q86VP6, P62195	10.677419354838708	8.716471469106812E-4
GOTERM_BP_DIRECT	GO:1901800~positive regulation of proteasomal protein catabolic process	9.530876177088486E-5	P35998, P43686, P17980, P62333, P62191, P62195	11.994285714285715	0.0036845434496707297
GOTERM_BP_DIRECT	GO:0030433~ER-associated ubiquitin-dependent protein catabolic process	5.233591918076048E-4	P35998, P43686, P14625, P17980, P11021, P62333, P62191, P55072, P62195	4.797714285714286	0.015819581820233797
GOTERM_CC_DIRECT	GO:0016234~inclusion body	0.0015533598109398897	P43686, P08238, P0DMV8, P62333, P62195	9.551362683438153	0.009763077056826774
GOTERM_BP_DIRECT	GO:0030163~protein catabolic process	0.008613245295960258	P35998, P43686, P17980, P62333, P62191, P62195	4.680696864111498	0.16622837441919303
Annotation Cluster 8	Enrichment Score: 5.279840475753903
Category	Term	PValue	Genes	Fold Enrichment	Benjamini
GOTERM_BP_DIRECT	GO:0036258~multivesicular body assembly	4.019734983418291E-15	Q9NP79, Q99816, O43633, Q9HD42, Q8WUM4, Q9H444, P62491, Q9H9H4, Q86VN1, Q9UN37, Q96EY5, Q9BY43, Q7LBR1, Q9BRG1, Q9UK41, P53990	16.50826420890937	9.029443859276398E-13
GOTERM_BP_DIRECT	GO:0039702~viral budding via host ESCRT complex	3.7117843735688863E-10	Q99816, O43633, Q96EY5, Q9HD42, Q7LBR1, Q9BY43, Q8WUM4, Q9H444, Q9H9H4, Q9UN37, Q9UK41	15.992380952380953	3.8702487770159166E-8
GOTERM_BP_DIRECT	GO:0019058~viral life cycle	2.8614855144211747E-7	Q99816, Q9NP79, O43633, Q96PU5, Q9BY43, Q8WUM4, Q9H444, Q9H9H4, Q9UN37, Q9UK41	10.317665130568356	2.041423462295633E-5
GOTERM_BP_DIRECT	GO:0000920~cell separation after cytokinesis	6.533774010787673E-7	Q53EZ4, O43633, Q9HD42, Q7LBR1, Q9BY43, Q8WUM4, Q9H444, Q9UN37	14.215449735449736	4.119233094412866E-5
GOTERM_BP_DIRECT	GO:0016197~endosomal transport	7.977837107503986E-7	Q9NP79, Q99816, O43633, P61026, Q15286, P51153, Q9H444, Q9H9H4, Q86VN1, Q9UN37, Q9BY43, Q9BRG1, Q9UK41	6.30002886002886	4.806090065101465E-5
GOTERM_BP_DIRECT	GO:0006997~nucleus organization	8.10897251501566E-7	P84243, Q53EZ4, O43633, Q9HD42, Q7LBR1, Q9BY43, Q8WUM4, Q9H444, Q9UN37	11.071648351648351	4.778893068169143E-5
GOTERM_BP_DIRECT	GO:0007080~mitotic metaphase plate congression	1.4941931894446224E-6	Q53EZ4, Q14974, O43633, Q9HD42, Q7LBR1, Q9BY43, Q8WUM4, Q9H444, P62491, Q9UN37	8.644530244530246	8.266517004185125E-5
GOTERM_BP_DIRECT	GO:1904903~ESCRT III complex disassembly	6.425307839065858E-6	Q9NP79, O43633, Q9HD42, Q7LBR1, Q9UN37, P53990	19.190857142857144	3.1100636879921595E-4
GOTERM_CC_DIRECT	GO:0031902~late endosome membrane	7.098931877166525E-6	Q99816, P07355, O43633, Q9H444, Q9H9H4, P51149, Q86VN1, Q9UN37, P08133, Q96EY5, Q9BY43, Q7LBR1, P08962, Q9UK41	4.7662245469830005	7.331017846667898E-5
GOTERM_CC_DIRECT	GO:0000815~ESCRT III complex	1.352657040997453E-5	O43633, Q9HD42, Q7LBR1, Q9BY43, Q9H444, Q9UN37	17.192452830188678	1.2804420091283575E-4
GOTERM_BP_DIRECT	GO:0006914~autophagy	1.7434734798044042E-5	Q9NP79, Q99816, O43633, P16144, Q9H444, Q9H9H4, Q86VN1, Q9UN37, Q96EY5, Q9BY43, Q9BRG1, Q9H0E2, P55072, P20073, Q9UK41, Q99497	3.8477909058360185	7.745519792025091E-4
GOTERM_BP_DIRECT	GO:0010824~regulation of centrosome duplication	2.3477335222414422E-4	Q9UHD1, O43633, Q9HD42, Q7LBR1, Q8WUM4, Q9H444	10.100451127819548	0.007925244365677875
GOTERM_BP_DIRECT	GO:1902188~positive regulation of viral release from host cell	2.597504292367015E-4	Q99816, O43633, Q9H444, Q9H9H4, Q9UN37	14.538528138528141	0.008551940442426464
GOTERM_BP_DIRECT	GO:1901673~regulation of mitotic spindle assembly	7.312362013739404E-4	O43633, Q9HD42, Q7LBR1, Q8WUM4, Q9H444	11.423129251700681	0.020875895172385528
GOTERM_BP_DIRECT	GO:1903543~positive regulation of exosomal secretion	9.726876467706695E-4	Q99816, O43633, Q8WUM4, P51149, Q9UN37	10.661587301587302	0.026561676238109122
GOTERM_BP_DIRECT	GO:0007034~vacuolar transport	0.0012651472750776058	O43633, Q9HD42, Q7LBR1, Q9BY43, Q9H444	9.995238095238097	0.03373761062852687
GOTERM_CC_DIRECT	GO:0030117~membrane coat	0.006317903127664347	O43633, Q7LBR1, Q9BY43, Q9H444, P63010	6.612481857764877	0.033704187280838904
GOTERM_BP_DIRECT	GO:0090611~ubiquitin-independent protein catabolic process via the multivesicular body sorting pathway	0.00912930405702463	Q8WUM4, Q9H444, Q9UN37	19.190857142857144	0.172871724072448
Annotation Cluster 9	Enrichment Score: 5.257700607106635
Category	Term	PValue	Genes	Fold Enrichment	Benjamini
GOTERM_CC_DIRECT	GO:0005852~eukaryotic translation initiation factor 3 complex	9.232298358565983E-9	P61221, P60228, Q13347, B5ME19, O15371, O00571, Q14152, O00303, P55884	18.20377358490566	1.6915951794871376E-7
GOTERM_CC_DIRECT	GO:0033290~eukaryotic 48S preinitiation complex	8.776325556316771E-8	P60228, Q13347, B5ME19, O15371, Q14152, P05198, O00303, P55884	18.338616352201257	1.2158414887109004E-6
GOTERM_BP_DIRECT	GO:0006446~regulation of translational initiation	1.1626324885138547E-6	P60228, Q13347, B5ME19, O15371, Q14152, Q04637, O00303, P55884, P04792, P60842	8.884656084656086	6.705942181195468E-5
GOTERM_CC_DIRECT	GO:0016282~eukaryotic 43S preinitiation complex	2.3285438526822936E-6	P60228, Q13347, B5ME19, O15371, Q14152, O00303, P55884	16.0462893081761	2.593328035882525E-5
GOTERM_MF_DIRECT	GO:0003743~translation initiation factor activity	2.469294561693602E-6	P60228, Q13347, B5ME19, O15371, Q9UKV8, Q14152, Q04637, P05198, O00303, P55884, P41091, P60842	6.301427815970386	8.035183135790547E-5
GOTERM_BP_DIRECT	GO:0001731~formation of translation preinitiation complex	4.393797169094451E-6	P60228, Q13347, B5ME19, O15371, Q14152, O00303, P55884, P41091	11.125134575569358	2.247221102418262E-4
GOTERM_CC_DIRECT	GO:0071541~eukaryotic translation initiation factor 3 complex, eIF3m	2.2917431053742672E-5	Q13347, O15371, Q14152, O00303, P55884	24.56064690026954	2.0337384798574387E-4
GOTERM_BP_DIRECT	GO:0075522~IRES-dependent viral translational initiation	9.627834011579338E-4	O15371, Q14152, O00303, P55884	18.27700680272109	0.026562121733606836
GOTERM_BP_DIRECT	GO:0075525~viral translational termination-reinitiation	0.00912930405702463	O15371, Q14152, P55884	19.190857142857144	0.172871724072448
Annotation Cluster 10	Enrichment Score: 4.729112843348594
Category	Term	PValue	Genes	Fold Enrichment	Benjamini
GOTERM_BP_DIRECT	GO:0009168~purine ribonucleoside monophosphate biosynthetic process	1.2777243359440785E-6	P22234, P22102, O15067, P12268, P49915, P31939, P30566	17.222564102564103	7.216224800399296E-5
GOTERM_BP_DIRECT	GO:0006189~'de novo' IMP biosynthetic process	1.3378106168612889E-5	P22234, P22102, O15067, P31939, P30566	26.653968253968255	6.042888176610584E-4
GOTERM_BP_DIRECT	GO:0006164~purine nucleotide biosynthetic process	3.800403113180019E-4	O15067, P12268, P31939, P11586, P30566	13.326984126984128	0.011910882093845054
Annotation Cluster 11	Enrichment Score: 4.170304042714658
Category	Term	PValue	Genes	Fold Enrichment	Benjamini
GOTERM_BP_DIRECT	GO:0061024~membrane organization	3.8718446481923396E-7	P61106, P62258, P61026, P51153, P31947, P61006, Q04917, P31946, P61981, P63104	9.995238095238097	2.5601069539193944E-5
GOTERM_CC_DIRECT	GO:0030659~cytoplasmic vesicle membrane	7.619095479595882E-7	P04083, Q9UL25, P61026, P51153, P31947, P61006, P31946, Q9NZM1, P62491, P61981, P61106, Q9Y696, P62258, Q9BY43, Q04917, Q9UNF0, P63104	4.6392333033842466	9.407885922407822E-6
GOTERM_BP_DIRECT	GO:1900740~positive regulation of protein insertion into mitochondrial membrane involved in apoptotic signaling pathway	0.0021680511225283714	P62258, P31947, Q04917, P31946, P61981, P63104	6.3969523809523805	0.05500591274272937
GOTERM_BP_DIRECT	GO:0006605~protein targeting	0.03257564105274211	P62258, O14908, P31946, P61981, P63104	4.100610500610501	0.4066638690685712
Annotation Cluster 12	Enrichment Score: 3.0842833752568186
Category	Term	PValue	Genes	Fold Enrichment	Benjamini
GOTERM_CC_DIRECT	GO:0016600~flotillin complex	2.3138462243301008E-6	O75955, Q14254, P12830, Q9ULV4, P35221, P35222	22.92327044025157	2.628497806189678E-5
GOTERM_BP_DIRECT	GO:0071681~cellular response to indole-3-methanol	0.00912930405702463	P12830, P35221, P35222	19.190857142857144	0.172871724072448
GOTERM_CC_DIRECT	GO:0016342~catenin complex	0.02644707882466427	P12830, P35221, P35222	11.461635220125785	0.11131880933790683
Annotation Cluster 13	Enrichment Score: 2.6753989420884774
Category	Term	PValue	Genes	Fold Enrichment	Benjamini
GOTERM_MF_DIRECT	GO:0005544~calcium-dependent phospholipid binding	4.1003771965083277E-4	P07355, Q99829, P04083, P09525, P50995, O75131, P12429, P20073, P08133	4.970522803114572	0.008857900361178617
GOTERM_MF_DIRECT	GO:0004859~phospholipase inhibitor activity	0.004117134652379918	P07355, P04083, P09525, P12429	11.648093841642229	0.05792358040784851
GOTERM_MF_DIRECT	GO:0019834~phospholipase A2 inhibitor activity	0.005576790027819149	P07355, P04083, P12429	24.024193548387096	0.07253900266921398
Annotation Cluster 14	Enrichment Score: 2.59720130736852
Category	Term	PValue	Genes	Fold Enrichment	Benjamini
GOTERM_BP_DIRECT	GO:0008361~regulation of cell size	3.0504889799385987E-4	O14745, P15311, Q86VI3, P35241, P26038, P63000	9.595428571428572	0.009683559139159748
GOTERM_BP_DIRECT	GO:0045198~establishment of epithelial cell apical/basal polarity	0.002205109514147286	O14745, P15311, Q13308, P26038	14.215449735449736	0.05540280652197149
GOTERM_BP_DIRECT	GO:0022612~gland morphogenesis	0.0240212970844765	O14745, P15311, P26038	11.994285714285715	0.3393757798224831
Annotation Cluster 15	Enrichment Score: 2.3447194593494247
Category	Term	PValue	Genes	Fold Enrichment	Benjamini
GOTERM_BP_DIRECT	GO:0008361~regulation of cell size	3.0504889799385987E-4	O14745, P15311, Q86VI3, P35241, P26038, P63000	9.595428571428572	0.009683559139159748
GOTERM_BP_DIRECT	GO:2000643~positive regulation of early endosome to late endosome transport	0.0015048235768774115	P15311, P35241, Q9UL25, P26038	15.992380952380953	0.03923551581792517
GOTERM_BP_DIRECT	GO:1903364~positive regulation of cellular protein catabolic process	0.004134192869090664	Q96QK1, P15311, P35241, P26038	11.630822510822512	0.09382043209293811
GOTERM_BP_DIRECT	GO:1902115~regulation of organelle assembly	0.0055928998987121795	P15311, P35241, P26038	23.98857142857143	0.11900875694179103
GOTERM_BP_DIRECT	GO:1902966~positive regulation of protein localization to early endosome	0.00912930405702463	P15311, P35241, P26038	19.190857142857144	0.172871724072448
GOTERM_BP_DIRECT	GO:0061028~establishment of endothelial barrier	0.012496149709299267	P15311, P35241, P26038, P61224	7.996190476190477	0.21749538241478683
GOTERM_CC_DIRECT	GO:0019898~extrinsic component of membrane	0.031905610999931985	P15311, P04083, Q6ZNJ1, P35241, P26038, Q9UNF0, Q9NZN4	2.9352968246663598	0.13023195206820404
Annotation Cluster 16	Enrichment Score: 2.250025178432876
Category	Term	PValue	Genes	Fold Enrichment	Benjamini
GOTERM_BP_DIRECT	GO:0007229~integrin-mediated signaling pathway	5.8914514226806466E-5	P22392, P06756, P05556, P17301, Q06124, Q13418, P16144, O14672, Q9P258, P23229, P05106, Q86UX7, P35579	4.20001924001924	0.002381070491330184
GOTERM_CC_DIRECT	GO:0008305~integrin complex	1.0235057069395727E-4	P06756, P05556, P17301, P16144, P23229, P05106, P35579	8.914605171208944	7.960952689599621E-4
GOTERM_BP_DIRECT	GO:0007160~cell-matrix adhesion	1.102967485528378E-4	P18206, P06756, P05556, P17301, P49023, Q13418, P16144, P23229, P08962, P35222, P05106, P63000	4.264634920634921	0.004032805455822519
GOTERM_BP_DIRECT	GO:0031589~cell-substrate adhesion	1.315698506453986E-4	P31146, P06756, P05556, P17301, P23229, P05106	11.288739495798318	0.004682546373844909
GOTERM_MF_DIRECT	GO:0038132~neuregulin binding	2.870452522747581E-4	P06756, P16144, P23229, P05106	25.625806451612902	0.006385653740978436
GOTERM_MF_DIRECT	GO:0043236~laminin binding	9.129737119643718E-4	P05556, P17301, P17931, P08865, P23229, P07996	7.687741935483871	0.017248491246340758
GOTERM_BP_DIRECT	GO:0033627~cell adhesion mediated by integrin	9.726876467706695E-4	P06756, P05556, P17301, P23229, P05106	10.661587301587302	0.026561676238109122
GOTERM_BP_DIRECT	GO:0048333~mesodermal cell differentiation	0.004134192869090664	P05556, P17301, P16144, P05106	11.630822510822512	0.09382043209293811
GOTERM_MF_DIRECT	GO:0031994~insulin-like growth factor I binding	0.005363536716698557	P06756, P16144, P23229, P05106	10.67741935483871	0.07103819310523796
GOTERM_MF_DIRECT	GO:0019960~C-X3-C chemokine binding	0.009103286544711325	P06756, P05556, P05106	19.219354838709677	0.10717854275456318
GOTERM_MF_DIRECT	GO:0001968~fibronectin binding	0.045986587278560656	P06756, P05556, P07996, P05106	4.92803970223325	0.344669565957342
GOTERM_BP_DIRECT	GO:0034113~heterotypic cell-cell adhesion	0.1492802379653369	P06756, P05556, P05106	4.361558441558442	0.83286539998719
GOTERM_MF_DIRECT	GO:0015026~coreceptor activity	0.23981828981135953	P06756, P05556, P05106	3.203225806451613	0.8123233800315165
GOTERM_CC_DIRECT	GO:0009897~external side of plasma membrane	0.27905275158402476	Q99683, P06756, P05556, P17301, P02786, P07237, P23229, P07996, Q08431	1.4528833377624235	0.654223620141053
GOTERM_MF_DIRECT	GO:0004872~receptor activity	0.673162129527216	Q07954, Q15758, P05556, P15151, P16144, P04264, P05106	1.0332986472424557	0.9957407327432519
GOTERM_CC_DIRECT	GO:0043235~receptor complex	0.7174992499575849	Q07954, P05556, P16144, P05106	1.0829891546575547	0.9708970757195798
Annotation Cluster 17	Enrichment Score: 2.067995569086889
Category	Term	PValue	Genes	Fold Enrichment	Benjamini
GOTERM_MF_DIRECT	GO:0019145~aminobutyraldehyde dehydrogenase activity	0.005576790027819149	P49189, O75891, Q8IZ83	24.024193548387096	0.07253900266921398
GOTERM_MF_DIRECT	GO:0047105~4-trimethylammoniobutyraldehyde dehydrogenase activity	0.005576790027819149	P49189, O75891, Q8IZ83	24.024193548387096	0.07253900266921398
GOTERM_MF_DIRECT	GO:0016620~oxidoreductase activity, acting on the aldehyde or oxo group of donors, NAD or NADP as acceptor	0.020102251698810854	P04406, P49189, O75891, Q8IZ83	6.743633276740238	0.1952773783140408
Annotation Cluster 18	Enrichment Score: 1.8793911445390101
Category	Term	PValue	Genes	Fold Enrichment	Benjamini
GOTERM_MF_DIRECT	GO:0030898~actin-dependent ATPase activity	5.325003439625584E-4	P35580, P60660, O43795, P35579, O94832	12.320099255583125	0.01118010146934012
GOTERM_CC_DIRECT	GO:0016459~myosin complex	0.014639130978158782	P35580, P60660, O43795, P35579, O14950, O94832	4.126188679245283	0.06852618315984182
GOTERM_BP_DIRECT	GO:0030048~actin filament-based movement	0.01482805171938484	P35580, Q9Y6W5, O43795, P35579	7.525826330532212	0.2466428223847642
GOTERM_MF_DIRECT	GO:0000146~microfilament motor activity	0.02311418784198636	P35580, O43795, P35579, O94832	6.406451612903226	0.21871238671433135
GOTERM_MF_DIRECT	GO:0003774~motor activity	0.15005357873609126	P35580, P60660, O43795, P35579, O94832	2.4266862170087977	0.6621892184171978
Annotation Cluster 19	Enrichment Score: 1.7105957587050071
Category	Term	PValue	Genes	Fold Enrichment	Benjamini
GOTERM_BP_DIRECT	GO:0046034~ATP metabolic process	4.0726664641907933E-4	P11142, P06576, P38606, P0DMV8, Q9NTK5, P55072, P21281	6.996666666666667	0.012470732948334895
GOTERM_BP_DIRECT	GO:0015991~ATP hydrolysis coupled proton transport	0.01687383828552444	P06576, P38606, P25705, P05023, P21281	4.9976190476190485	0.2678172458893384
GOTERM_MF_DIRECT	GO:0046961~proton-transporting ATPase activity, rotational mechanism	0.045986587278560656	P06576, P38606, P25705, P21281	4.92803970223325	0.344669565957342
GOTERM_BP_DIRECT	GO:0015992~proton transport	0.4548760350668843	P06576, P38606, P21281	1.9582507288629738	0.9933615119335953
Annotation Cluster 20	Enrichment Score: 1.6698096063201922
Category	Term	PValue	Genes	Fold Enrichment	Benjamini
GOTERM_BP_DIRECT	GO:0006090~pyruvate metabolic process	0.004384392494529097	O15427, P53985, P35613, P00338, P07195	7.269264069264071	0.09840019391292665
GOTERM_BP_DIRECT	GO:0015718~monocarboxylic acid transport	0.03704873522832565	O15427, P53985, P35613	9.595428571428572	0.4318971676681863
GOTERM_MF_DIRECT	GO:0008028~monocarboxylic acid transmembrane transporter activity	0.06024047238763416	O15427, P53985, P35613	7.392059553349876	0.41676276316020966
Annotation Cluster 21	Enrichment Score: 1.6326534318351442
Category	Term	PValue	Genes	Fold Enrichment	Benjamini
GOTERM_CC_DIRECT	GO:0071013~catalytic step 2 spliceosome	0.0014022307563712935	Q07955, P11940, P07910, P52272, P22626, P62318, Q15029, Q6P2Q9, Q00839, P38919	3.7374897456931913	0.009016221615019582
GOTERM_BP_DIRECT	GO:0000398~mRNA splicing, via spliceosome	0.010077314002614645	P52272, P22626, Q13247, Q15029, Q07955, P11142, P11940, P07910, O43143, Q16629, P62318, Q6P2Q9, P38919, Q00839, Q15365	2.161132561132561	0.18653511016227298
GOTERM_CC_DIRECT	GO:0005681~spliceosomal complex	0.019547076079834306	P11142, P07910, P52272, P22626, P62318, P17931, Q15029, Q6P2Q9	2.92637494981935	0.08781027040886535
GOTERM_BP_DIRECT	GO:0008380~RNA splicing	0.07624581235359001	P07910, O43143, P62318, Q16629, Q92945, P30153, P17931, Q15029, Q6P2Q9, P38919	1.9267928858290304	0.6373024685874042
GOTERM_BP_DIRECT	GO:0006397~mRNA processing	0.326039907939899	Q07955, O43143, P22626, Q16629, Q92945, P17931, Q15029, Q6P2Q9	1.4294865655759512	0.971723593586716
Annotation Cluster 22	Enrichment Score: 1.5778259773941827
Category	Term	PValue	Genes	Fold Enrichment	Benjamini
GOTERM_MF_DIRECT	GO:0008426~protein kinase C inhibitor activity	0.002847167861323688	P31947, P04792, P61981	32.03225806451613	0.044427933214436166
GOTERM_BP_DIRECT	GO:0071901~negative regulation of protein serine/threonine kinase activity	0.017388792900896795	O75367, P31947, P04792, P61981	7.107724867724868	0.2732449090394662
GOTERM_BP_DIRECT	GO:0006469~negative regulation of protein kinase activity	0.3731122946591081	Q13418, P31947, P04792, P61981, Q99497	1.6153920153920156	0.9838169641454594
Annotation Cluster 23	Enrichment Score: 1.55516828683857
Category	Term	PValue	Genes	Fold Enrichment	Benjamini
GOTERM_CC_DIRECT	GO:0031513~nonmotile primary cilium	0.004007728916638583	Q9UHD8, P23258, Q15019, P61006, Q16181	7.4749794913863825	0.022776643712235756
GOTERM_CC_DIRECT	GO:0031105~septin complex	0.007934546930304983	Q9UHD8, Q15019, Q16181	20.630943396226414	0.03994426828727882
GOTERM_CC_DIRECT	GO:0005930~axoneme	0.6793204180203878	Q9UHD8, Q15019, Q16181	1.2894339622641509	0.9610781491196326
Annotation Cluster 24	Enrichment Score: 1.3924091162587358
Category	Term	PValue	Genes	Fold Enrichment	Benjamini
GOTERM_BP_DIRECT	GO:0051256~mitotic spindle midzone assembly	0.0240212970844765	Q9H0H5, O95239, Q02241	11.994285714285715	0.3393757798224831
GOTERM_BP_DIRECT	GO:0007018~microtubule-based movement	0.04081563329981398	Q9H0H5, P33176, Q9Y6G9, Q14204, O95239, P63010, Q02241	2.7641152263374487	0.45700944576313485
GOTERM_BP_DIRECT	GO:0019886~antigen processing and presentation of exogenous peptide antigen via MHC class II	0.06781873071967359	Q9H0H5, Q14204, O95239, Q00610, P63010, P51149, Q02241	2.4336231884057975	0.6013809820264252
Annotation Cluster 25	Enrichment Score: 1.3830941387798912
Category	Term	PValue	Genes	Fold Enrichment	Benjamini
GOTERM_MF_DIRECT	GO:0017134~fibroblast growth factor binding	0.03353167291518425	P15880, P06756, P07996, P05106	5.570827489481066	0.2802536760047626
GOTERM_MF_DIRECT	GO:0050840~extracellular matrix binding	0.045986587278560656	P06756, P07996, Q15582, P05106	4.92803970223325	0.344669565957342
GOTERM_MF_DIRECT	GO:0001968~fibronectin binding	0.045986587278560656	P06756, P05556, P07996, P05106	4.92803970223325	0.344669565957342
Annotation Cluster 26	Enrichment Score: 1.3722797269551992
Category	Term	PValue	Genes	Fold Enrichment	Benjamini
GOTERM_BP_DIRECT	GO:1900034~regulation of cellular response to heat	0.008822411925502056	P07900, P11142, Q9UHD1, P08238, P62258, P0DMV8, P28482, Q92598	3.411707936507937	0.16872748798744153
GOTERM_BP_DIRECT	GO:0031396~regulation of protein ubiquitination	0.08743865569091457	P07900, P08238, P0DMV8	5.997142857142857	0.6795001496361869
GOTERM_MF_DIRECT	GO:0042826~histone deacetylase binding	0.09905354332307154	P07900, P35232, P08238, P62258, P0DMV8, P31946, P63000	2.198292220113852	0.5465766008542681
Annotation Cluster 27	Enrichment Score: 1.2669688124151672
Category	Term	PValue	Genes	Fold Enrichment	Benjamini
GOTERM_BP_DIRECT	GO:0006610~ribosomal protein import into nucleus	0.0015048235768774115	Q14974, Q92973, P62829, O00410	15.992380952380953	0.03923551581792517
GOTERM_BP_DIRECT	GO:0000060~protein import into nucleus, translocation	0.010592210991707509	Q14974, Q92973, P62826, Q99623, O00410	5.7115646258503405	0.19252390476538817
GOTERM_BP_DIRECT	GO:0000059~protein import into nucleus, docking	0.0240212970844765	Q14974, Q92973, O00410	11.994285714285715	0.3393757798224831
GOTERM_CC_DIRECT	GO:0034399~nuclear periphery	0.123027322231001	Q14974, Q92973, O00410	4.912129380053908	0.3762098608356723
GOTERM_BP_DIRECT	GO:0006607~NLS-bearing protein import into nucleus	0.16029195513178066	Q14974, Q92973, O00410	4.17192546583851	0.8507400782105361
GOTERM_MF_DIRECT	GO:0008565~protein transporter activity	0.18649333922019257	Q96QK1, Q14974, Q92973, P63010, O00410	2.2244623655913975	0.7390241955690213
GOTERM_MF_DIRECT	GO:0008139~nuclear localization sequence binding	0.21663165212113789	Q14974, Q92973, O00410	3.4320276497695854	0.7878088193982935
GOTERM_MF_DIRECT	GO:0008536~Ran GTPase binding	0.23981828981135953	Q14974, Q92973, O00410	3.203225806451613	0.8123233800315165
Annotation Cluster 28	Enrichment Score: 1.198617769057355
Category	Term	PValue	Genes	Fold Enrichment	Benjamini
GOTERM_MF_DIRECT	GO:0015175~neutral amino acid transmembrane transporter activity	0.044244620959987185	Q15758, P08195, Q01650	8.736070381231672	0.3369884787030356
GOTERM_BP_DIRECT	GO:0015804~neutral amino acid transport	0.06039820815027961	Q15758, P08195, Q01650	7.381098901098901	0.5702125781288125
GOTERM_BP_DIRECT	GO:0006865~amino acid transport	0.09489911436787167	Q15758, P08195, Q8WUX1, Q01650	3.655401360544218	0.7024448703560897
Annotation Cluster 29	Enrichment Score: 1.169319528875899
Category	Term	PValue	Genes	Fold Enrichment	Benjamini
GOTERM_BP_DIRECT	GO:0010501~RNA secondary structure unwinding	0.047675578728268934	Q9UKV8, O00571, P38919, Q9NUU7, P60842	3.6346320346320353	0.500104562314937
GOTERM_MF_DIRECT	GO:0004004~ATP-dependent RNA helicase activity	0.05173060845898858	O43143, O00571, P38919, Q92900, Q9NUU7, P60842	2.9568238213399503	0.37256394255465675
GOTERM_MF_DIRECT	GO:0004386~helicase activity	0.12589191885041146	P04083, O00571, P38919, Q92900, Q9NUU7, P60842	2.261100569259962	0.6153086148432555
Annotation Cluster 30	Enrichment Score: 0.9041225028211572
Category	Term	PValue	Genes	Fold Enrichment	Benjamini
GOTERM_BP_DIRECT	GO:0007018~microtubule-based movement	0.04081563329981398	Q9H0H5, P33176, Q9Y6G9, Q14204, O95239, P63010, Q02241	2.7641152263374487	0.45700944576313485
GOTERM_CC_DIRECT	GO:0005871~kinesin complex	0.19892208763914004	P33176, P62258, O95239, Q02241	2.5950872196511217	0.5275792752331865
GOTERM_MF_DIRECT	GO:0003777~microtubule motor activity	0.23884873400494758	P33176, Q9Y6G9, Q14204, O95239, Q02241	2.002016129032258	0.8133219930853867
Annotation Cluster 31	Enrichment Score: 0.809603181762508
Category	Term	PValue	Genes	Fold Enrichment	Benjamini
GOTERM_CC_DIRECT	GO:0005623~cell	0.07097686914662565	P30041, P30101, P18206, P07237, P32119, P02794, P21399	2.4069433962264153	0.24470858787492933
GOTERM_BP_DIRECT	GO:0000302~response to reactive oxygen species	0.12124750769972727	P30041, P22352, P07237, P32119	3.2804884004884003	0.7777321247009727
GOTERM_BP_DIRECT	GO:0045454~cell redox homeostasis	0.4329131681313348	P30041, P30101, P07237, P32119	1.6615460729746445	0.9913160774670107
Annotation Cluster 32	Enrichment Score: 0.7984770574366763
Category	Term	PValue	Genes	Fold Enrichment	Benjamini
GOTERM_CC_DIRECT	GO:0000786~nucleosome	0.019547076079834306	P10412, P84243, O75367, P07305, Q5SSJ5, Q8IUE6, Q16777, P62805	2.92637494981935	0.08781027040886535
GOTERM_BP_DIRECT	GO:0006334~nucleosome assembly	0.07905155382444812	P10412, P84243, O75367, P55209, P07305, Q5SSJ5, P06748, P62805	2.150236094437775	0.6459763048307892
GOTERM_CC_DIRECT	GO:0000784~nuclear chromosome, telomeric region	0.08467905114703825	P84243, O75367, P12956, P12004, Q92900, P78527, P62136, P62805	2.1159941944847604	0.28153457853714503
GOTERM_CC_DIRECT	GO:0000228~nuclear chromosome	0.4578323514344931	P84243, O75367, P62805	1.946315414738341	0.8426944424478244
GOTERM_BP_DIRECT	GO:0045814~negative regulation of gene expression, epigenetic	0.4653116607472657	P84243, O75367, P62805	1.9190857142857143	0.9941614344614982
GOTERM_BP_DIRECT	GO:0045815~positive regulation of gene expression, epigenetic	0.5806561692103347	P84243, O75367, P62805	1.5476497695852534	0.9988525453077228
Annotation Cluster 33	Enrichment Score: 0.7574849619923455
Category	Term	PValue	Genes	Fold Enrichment	Benjamini
GOTERM_CC_DIRECT	GO:0000786~nucleosome	0.019547076079834306	P10412, P84243, O75367, P07305, Q5SSJ5, Q8IUE6, Q16777, P62805	2.92637494981935	0.08781027040886535
GOTERM_BP_DIRECT	GO:0006342~chromatin silencing	0.4120088642535072	O75367, Q8IUE6, Q16777	2.1323174603174606	0.98918940424574
GOTERM_CC_DIRECT	GO:0000790~nuclear chromatin	0.663065987297552	O75367, P07910, P18754, P07305, Q8IUE6, Q16777	1.0689607977319386	0.9565695528822671
Annotation Cluster 34	Enrichment Score: 0.7489852646239019
Category	Term	PValue	Genes	Fold Enrichment	Benjamini
GOTERM_BP_DIRECT	GO:0006406~mRNA export from nucleus	0.036920570458196855	Q07955, P22626, Q13247, Q16629, P38919, Q92900, Q9NUU7, P63241	2.5587809523809524	0.43254271499850605
GOTERM_BP_DIRECT	GO:0006369~termination of RNA polymerase II transcription	0.13910289421740102	Q07955, Q13247, P62318, Q16629, P38919	2.4988095238095243	0.8171286193866255
GOTERM_BP_DIRECT	GO:0031124~mRNA 3'-end processing	0.2044210187582421	Q07955, Q13247, Q16629, P38919	2.5587809523809524	0.9112329732317511
GOTERM_BP_DIRECT	GO:0006405~RNA export from nucleus	0.24571924228381625	Q07955, Q13247, Q16629, P38919	2.3261645021645023	0.937956208472536
GOTERM_CC_DIRECT	GO:0016607~nuclear speck	0.6974360504818459	Q07955, Q13247, O00571, Q15029, Q6P2Q9, P38919	1.0264150943396224	0.9664632639405186
Annotation Cluster 35	Enrichment Score: 0.6336067193435084
Category	Term	PValue	Genes	Fold Enrichment	Benjamini
GOTERM_BP_DIRECT	GO:0048660~regulation of smooth muscle cell proliferation	0.03025449353285364	P12956, P35222, P78527	10.661587301587302	0.3890976756723791
GOTERM_BP_DIRECT	GO:0032481~positive regulation of type I interferon production	0.21255534650594682	Q7Z2W4, P12956, P35222, P78527	2.508608776844071	0.9172259269950631
GOTERM_MF_DIRECT	GO:0003690~double-stranded DNA binding	0.4647248907443161	P12956, P35222, Q99497, P78527	1.5818399044205498	0.9638631601695246
GOTERM_CC_DIRECT	GO:0005667~transcription factor complex	0.9774966282809625	P12956, P35222, P78527	0.5344803988659693	0.999951360500861
Annotation Cluster 36	Enrichment Score: 0.344164630346893
Category	Term	PValue	Genes	Fold Enrichment	Benjamini
GOTERM_BP_DIRECT	GO:0006821~chloride transport	0.3562141330047157	O00299, Q9Y696, Q9C0H2	2.398857142857143	0.9800476721586859
GOTERM_CC_DIRECT	GO:0034707~chloride channel complex	0.41817342505668054	O00299, Q9Y696, Q9C0H2	2.1051983057373893	0.8155200752156335
GOTERM_MF_DIRECT	GO:0005254~chloride channel activity	0.5050437696375815	O00299, Q9Y696, Q9C0H2	1.7795698924731183	0.9743131343235666
GOTERM_BP_DIRECT	GO:1902476~chloride transmembrane transport	0.5583993247445095	O00299, Q9Y696, P55011, Q9C0H2	1.375688684075781	0.9984057907169331
Annotation Cluster 37	Enrichment Score: 0.19161011812372916
Category	Term	PValue	Genes	Fold Enrichment	Benjamini
GOTERM_MF_DIRECT	GO:0004674~protein serine/threonine kinase activity	0.506613203652414	O95819, P22392, Q99683, P51812, Q8N4C8, Q7L7X3, O75131, Q13418, P28482, P67870, Q02750, P68400, P78527	1.1074982841455046	0.9741113754739833
GOTERM_MF_DIRECT	GO:0004672~protein kinase activity	0.6854417644391791	O95819, Q13308, Q99683, P51812, Q8N4C8, Q7L7X3, P27708, Q13418, Q02750, P68400, P78527	0.9814898014197143	0.9963408335861791
GOTERM_BP_DIRECT	GO:0006468~protein phosphorylation	0.7665183894563862	O95819, Q13308, Q99683, P51812, Q8N4C8, Q7L7X3, O75131, Q13418, P28482, P67870, O14672, P68400, P07948	0.9118462823725982	0.9999751081889273
Annotation Cluster 38	Enrichment Score: 0.02631007366687071
Category	Term	PValue	Genes	Fold Enrichment	Benjamini
GOTERM_BP_DIRECT	GO:0042787~protein ubiquitination involved in ubiquitin-dependent protein catabolic process	0.8604232499473661	O00308, Q96PU5, Q5T4S7, Q7Z6Z7	0.8362029256146903	0.9999990827886085
GOTERM_MF_DIRECT	GO:0004842~ubiquitin-protein transferase activity	0.9776743199170557	O00308, Q96PU5, Q5T4S7, P22314, P61088, Q7Z6Z7	0.5841749191097166	0.9999999482134074
GOTERM_MF_DIRECT	GO:0016874~ligase activity	0.9912048853692947	O00308, Q96PU5, Q5T4S7, Q7Z6Z7	0.4745519713261649	0.9999999987969261
