# Supplementary material for: Characterisation of Colorectal Cancer Cell Lines through Proteomic Profiling of Their Extracellular Vesicles
Source: Proteomes. 2023 Jan 11;11(1):3. doi: 10.3390/proteomes11010003 (PMC9844407; doi:10.3390/proteomes11010003)
Supplement: Supplementary file 1 [file proteomes-11-00003-s001.zip › Table S4.xlsx]

## Sheet: Whole Cells
Figure 3 Whole cell KEGG analysis
Benjamini-Hochberg corrected p-values
HCT116 Whole Cell Proteins 4501					HT29 Whole Cell Proteins 4398					SW620 Whole Cell Proteins 4536
Term	Gene count	Genes	Benjamini		Term	Gene count	Genes	Benjamini		Term	Gene count	Genes	Benjamini
hsa03040:Spliceosome	116	O60306, Q13573, O75494, Q01081, O95777, P11142, O43290, Q16629, O60508, Q00839, P61978, Q96J01, P08579, P17844, Q8WYA6, Q8IWX8, Q9BWJ5, Q9UKV3, Q53GS9, Q15459, P38159, P34931, Q13595, Q8WWY3, Q7L014, Q9Y2W2, P62306, P41223, P62308, Q96FV9, P62304, Q9UK45, Q6P2Q9, P17066, O43395, P26368, P51991, Q9BUQ8, Q13838, Q13435, Q8WVK2, Q08170, O75400, Q5VTL8, P61326, Q96A72, O43447, Q01130, Q14562, Q09161,…	5.77706e-38		hsa03040:Spliceosome	113	O60306, Q13573, O75494, Q01081, O95777, P11142, O43290, Q16629, Q00839, P61978, Q96J01, P08579, P17844, Q8WYA6, Q8IWX8, Q9BWJ5, Q9UKV3, Q53GS9, Q15459, P38159, P34931, Q13595, Q8WWY3, Q7L014, Q9Y2W2, P62306, P41223, P62308, Q96FV9, P62304, Q9UK45, Q6P2Q9, P17066, O43395, P26368, P51991, Q9BUQ8, Q13838, Q13435, Q08170, O75400, Q5VTL8, P61326, Q96A72, O43447, Q01130, Q14562, Q09161, Q12874, Q15029,…	7.60575e-35		hsa03040:Spliceosome	115	O60306, Q13573, O75494, Q01081, O95777, P11142, O43290, Q16629, O60508, Q00839, P61978, Q96J01, P08579, P17844, Q8WYA6, Q8IWX8, Q9BWJ5, Q9UKV3, Q53GS9, Q15459, P38159, P34931, Q13595, Q8WWY3, Q7L014, Q9Y2W2, P62306, P41223, P62308, Q96FV9, P62304, Q9UK45, Q6P2Q9, O43395, P26368, P51991, Q9BUQ8, Q13838, Q13435, Q08170, O75400, Q5VTL8, P61326, Q96A72, O43447, Q01130, Q14562, Q09161, Q12874, Q15029,…	8.88166e-37
hsa03010:Ribosome	113	Q9BQ48, Q71UM5, P36578, P61513, P62750, P62753, P27635, P08865, P82675, P62269, P62857, P61247, P62266, Q7Z2W9, Q7Z7H8, P47914, P61313, P63220, P62263, P23396, P62854, P62851, Q16540, P49207, P39019, Q9P015, Q6P5R6, Q9BYC8, P62861, P61254, Q02878, P82932, P82933, O60783, P49406, P39023, Q9NX20, P30050, P63173, P62249, P84098, P62906, P62241, P62244, P82921, P62701, P82912, P82914, P05387, P05386,…	4.44045e-33		hsa03010:Ribosome	112	Q9BQ48, Q71UM5, P36578, P61513, P62750, P62753, P27635, P08865, P82675, P62269, P62857, P61247, P62266, Q7Z2W9, Q7Z7H8, P47914, P61313, P63220, P62263, P23396, P62854, P62851, Q16540, P49207, P39019, Q9P015, Q9BYC8, P62861, P61254, Q02878, P82932, P82933, O60783, P49406, P39023, Q9NX20, P30050, P63173, P62249, P84098, P62906, P62241, P62244, P62701, P82912, P82914, P05387, P05386, P42766, Q9NZE8,…	2.7103e-32		hsa03010:Ribosome	113	Q9BQ48, Q71UM5, P36578, P61513, P62750, P62753, P27635, P08865, P82675, P62269, P62857, P61247, P62266, Q7Z2W9, Q7Z7H8, P47914, P61313, P63220, P62263, P23396, P62854, P62851, Q16540, P49207, P39019, Q9P015, Q9BYC8, P62861, P61254, Q02878, P82932, P82933, O60783, P49406, P39023, Q9NX20, P30050, P63173, P62249, P84098, P62906, P62241, P62244, P82921, P62701, P82912, P82914, P05387, P05386, P42766,…	4.88891e-33
hsa01130:Biosynthesis of antibiotics	141	P24752, P04406, P53597, Q99714, O76062, O95394, O43175, P17858, P14324, P54819, P52789, P00568, Q16822, P53396, Q96AT9, Q01433, P32929, P08559, Q9BRR6, P49419, Q9NR19, P18669, P10515, O43837, P23434, P04181, P27144, P36871, P08237, P00558, P15259, Q16836, P78330, Q16851, Q01813, Q16850, P04075, P04040, P09622, P11766, Q3KQV9, P30566, P31040, P22392, P11310, O95336, P22102, Q13907, P53602, P09104,…	5.21397e-24		hsa01130:Biosynthesis of antibiotics	145	P24752, P04406, P53597, Q99714, O95394, O76062, O43175, P17858, P14324, P54819, P52789, P00568, Q16822, P53396, Q96AT9, Q01433, P32929, P08559, Q9BRR6, P49419, Q14534, P18669, P10515, O43837, P23434, P04181, Q2TB90, P27144, P36871, P08237, P00558, P15259, Q16836, P78330, Q16851, Q01813, Q16850, P04075, P04040, P09622, P11766, Q3KQV9, P30566, P31040, P22392, P11310, O95336, P22102, Q13907, P53602,…	6.10041e-27		hsa03013:RNA transport	123	Q15287, Q96EE3, P55735, Q13144, Q9HAU5, Q13769, P12270, P49792, P49790, Q9BZI7, O75694, Q8N1F7, P57740, Q9HAV4, Q7Z3B4, O75818, Q8TEQ6, Q96J01, O75817, Q96Q11, Q05639, P68104, Q9BRP8, Q9Y3F4, Q99567, O75822, Q8IYB3, O75821, Q04637, Q86W42, P55010, Q9BQ52, O95059, P41567, P60842, P20042, Q13347, P11940, Q9UKV3, Q16637, Q06787, P51116, P51114, Q9Y6A5, Q14974, Q96F07, Q96FV9, Q9H074, O95149, Q9BTX1,…	4.23759e-25
hsa03013:RNA transport	120	Q15287, Q96EE3, P55735, Q13144, Q9HAU5, Q13769, P12270, P49792, P49790, Q9BZI7, O75694, Q8N1F7, P57740, Q9HAV4, Q7Z3B4, O75818, Q8TEQ6, Q96J01, Q96Q11, Q05639, P68104, Q9BRP8, Q9Y3F4, Q99567, O75822, Q8IYB3, O75821, Q04637, Q86W42, P55010, Q9BQ52, O95059, P41567, P60842, P20042, Q13347, P11940, Q9UKV3, Q16637, Q06787, P51116, P51114, Q9Y6A5, Q9H361, Q14974, Q96F07, Q96FV9, Q9H074, O95149, Q9BTX1,…	4.36465e-23		hsa01100:Metabolic pathways	533	P16278, O75964, Q96GX9, Q8NE62, P07741, Q9H0P0, P21964, Q8N0W3, P31350, Q11201, P14324, P26572, P52789, P52788, Q16822, Q01433, Q96AT9, P22695, P52434, P52435, P13995, P19388, P19387, P13073, P27144, Q9BV79, P27338, Q9HAN9, P00846, Q16836, Q10471, Q16851, Q92903, Q16850, Q6UB35, P46926, P11766, Q3KQV9, P16152, Q16706, P22307, O95544, P53602, Q9NXE4, O75380, Q9BZX2, O75489, Q13232, P14927, Q9NP73,…	1.67988e-22		hsa01130:Biosynthesis of antibiotics	140	P24752, P35520, P04406, P53597, Q99714, O95394, O43175, P17858, P14324, P54819, P52789, P00568, Q16822, P53396, Q96AT9, Q01433, P32929, P08559, Q9BRR6, P49419, Q9NR19, P18669, P10515, O43837, P23434, P04181, Q2TB90, P27144, P36871, P08237, P00558, P15259, Q16836, P78330, Q16851, Q16850, Q01813, P04075, P09622, P11766, Q3KQV9, P30566, P31040, P22392, P11310, O95336, P22102, Q13907, P09104, P51648,…	1.90911e-23
hsa01200:Carbon metabolism	83	P24752, P04406, P00367, Q3LXA3, P17174, P53597, P06733, Q02252, P48735, O43175, P29401, P17858, P52789, Q96I99, Q99643, P10768, Q96AT9, P08559, P36957, Q9BRR6, Q08426, P11498, Q9NR19, P40925, P40926, P18669, P10515, O43837, P06744, Q02218, P48163, P09972, P16219, P11177, Q6NVY1, P00558, P08237, P11413, P52209, P22033, P49247, P15259, P78330, Q9P2R7, P23368, Q01813, A6NDG6, P04075, P00505, P04040,…	7.47545e-18		hsa03013:RNA transport	115	Q15287, Q96EE3, P55735, Q13144, Q9HAU5, Q13769, P12270, P49792, O75694, P49790, Q8N1F7, P57740, Q9HAV4, Q7Z3B4, O75818, Q8TEQ6, Q96J01, O75817, Q96Q11, Q05639, P68104, Q9BRP8, Q9Y3F4, Q99567, O75822, Q8IYB3, O75821, Q04637, Q86W42, P55010, Q9BQ52, P41567, P60842, P20042, Q13347, P11940, Q9UKV3, Q16637, Q06787, P51116, P51114, Q9Y6A5, Q14974, Q96FV9, Q9H074, O95149, Q9BTX1, O43432, O60739, Q7L576,…	5.44269e-20		hsa01200:Carbon metabolism	82	P24752, P04406, P00367, Q3LXA3, P17174, P53597, P06733, Q02252, P48735, O43175, P29401, P17858, P52789, Q96I99, P10768, Q96AT9, P08559, P36957, Q9BRR6, Q08426, P11498, Q9NR19, P40925, P40926, P18669, P10515, O43837, P06744, Q02218, P48163, Q2TB90, P09972, P16219, P11177, Q6NVY1, P00558, P08237, P11413, P52209, P22033, P49247, P15259, P78330, Q9P2R7, P23368, Q01813, A6NDG6, P04075, P00505, P11766,…	4.59937e-17
hsa01100:Metabolic pathways	511	P16278, O75964, Q96GX9, Q8NE62, P07741, Q9H0P0, P21964, Q8N0W3, P31350, P14324, P52789, P52788, Q16822, Q01433, Q96AT9, P22695, P52434, P52435, P13995, P19388, P19387, P13073, P27144, Q9BV79, P27338, Q9HAN9, P00846, Q16836, Q10471, Q16851, Q16850, Q6UB35, P46926, P11766, Q3KQV9, Q16706, P22307, O95544, P53602, Q9NXE4, O75380, P00813, Q9BZX2, O75489, Q13232, P14927, Q9NP73, Q13630, P21953, Q99447,…	2.70444e-16		hsa01200:Carbon metabolism	82	P24752, P04406, P09467, P00367, Q3LXA3, P17174, P53597, P06733, Q02252, P48735, O43175, P29401, P17858, P52789, Q96I99, P10768, Q96AT9, P08559, P36957, Q9BRR6, Q08426, P11498, P40925, P40926, P18669, P10515, O43837, P06744, Q02218, P48163, Q2TB90, P09972, P16219, P11177, Q6NVY1, P00558, P08237, P11413, P52209, P22033, P49247, P15259, P78330, Q9P2R7, P23368, Q01813, A6NDG6, P04075, P00505, P04040,…	2.55386e-17		hsa01100:Metabolic pathways	514	P16278, O75964, Q96GX9, Q8NE62, P07741, Q9H0P0, P21964, Q8N0W3, P31350, P14324, P26572, P52789, P52788, Q16822, Q01433, Q96AT9, P22695, P52434, P52435, P13995, P19388, P19387, P13073, P27144, Q9BV79, Q9HAN9, P00846, Q16831, Q16836, Q10471, Q16851, Q16850, Q6UB35, P46926, P11766, Q3KQV9, P16152, Q16706, P22307, Q9NXE4, O95544, O75380, P00813, Q9BZX2, O75489, Q13232, P14927, Q9NP73, Q13630, P21953,…	6.17308e-17
hsa04141:Protein processing in endoplasmic reticulum	105	P17655, Q07065, P55735, Q12907, Q9NZL4, P61077, P11142, O94855, Q9UHD9, Q9Y6B6, P60059, Q8NBS9, O60884, Q9UKV5, P14314, Q9P2E9, Q9UKM7, P08238, P62253, P07237, P45983, Q9H173, P34931, Q9UMX0, O94979, P13667, Q9NXW2, P14625, O95757, P63208, O95816, P53992, P11021, P55072, Q13217, P17066, Q9UGP8, Q8TCJ2, P30101, P27824, P19525, Q99442, Q92890, P07384, Q12933, P30040, Q9Y263, P61803, Q15084, Q13438,…	1.36557e-14		hsa03050:Proteasome	39	P35998, P43686, P48556, P25788, Q13200, O43242, P25789, P25786, P25787, P40306, Q14997, Q99460, Q99436, Q92530, P62195, O00487, Q9Y244, P20618, P28062, P61289, P17980, P55036, P28066, Q9UL46, Q06323, P28074, P28072, P28070, O14818, Q9UNM6, Q15008, P62333, P51665, P60900, P49721, O00231, P49720, P62191, O00232	1.70974e-12		hsa05016:Huntington's disease	114	Q86Y39, O00291, O00483, P12074, Q9UDW1, O43181, P03928, P18859, Q9UKL0, P22695, P55211, P47985, P19404, Q9NYC9, P52434, P52435, P08574, Q13561, Q00059, O00217, O15514, P19388, P19387, P13073, Q07812, P00846, O95782, P09497, P09496, Q9C0G6, P09669, P45880, Q14643, P15954, P30876, P31040, O14727, O00268, O94973, P42858, P30049, Q00610, P00403, Q16795, O75380, O43920, O75489, P14927, P12236, P62380,…	7.30527e-14
hsa05016:Huntington's disease	111	Q86Y39, O00483, P12074, Q9UDW1, O43181, P03928, P18859, Q9UKL0, P22695, P55211, P47985, P19404, Q9NYC9, P52434, P52435, P08574, Q14790, Q13561, Q00059, O00217, O15514, P19388, P19387, P13073, P00846, O95782, P09497, P09496, Q9C0G6, P09669, P45880, P15954, P30876, P31040, O14727, O00268, P42858, O94973, P30049, Q00610, P00403, Q16795, O75380, O43920, O75489, P14927, P12236, O95139, P12235, P06576,…	1.8785e-12		hsa04141:Protein processing in endoplasmic reticulum	100	P17655, Q07065, P55735, Q12907, Q9NZL4, P61077, P11142, O94855, Q9UHD9, Q9Y6B6, P60059, Q8NBS9, O60884, Q9UKV5, P14314, Q9UKM7, P08238, Q9P2E9, Q07812, P62253, P07237, Q9H173, P34931, Q9UMX0, O94979, P13667, Q9NXW2, O95757, P14625, P63208, O95816, P53992, P11021, P55072, Q13217, P17066, Q9UGP8, Q8TCJ2, P30101, P27824, P19525, Q99442, Q92890, P07384, P30040, Q9Y263, Q12933, P61803, Q15084, Q13438,…	3.7379e-12		hsa00190:Oxidative phosphorylation	85	Q16864, O14561, O14949, O75964, Q86Y39, O00483, Q15181, P12074, Q9UDW1, O43181, O95168, P03928, O95169, P38606, P18859, Q9Y6M9, P36542, P36543, P22695, P19404, P47985, P08574, Q9P0J0, P51970, P56385, O00217, P21283, P21281, P13073, P24539, P10606, O95299, P28331, P00846, O14548, Q9Y487, O43674, Q9H2U2, O43676, O15239, O96000, P56134, P09669, P03905, O75438, O43678, P15954, Q93050, P31040, Q9Y5K8,…	1.09113e-12
hsa00190:Oxidative phosphorylation	84	O14561, O14949, O75964, Q86Y39, O00483, Q15181, P12074, Q9UDW1, O43181, O95168, P03928, O95169, P38606, P18859, Q99643, Q9Y6M9, P36542, P36543, P22695, P19404, P47985, Q9Y6N1, P08574, Q9P0J0, P51970, P56385, O00217, P21283, P21281, P13073, P24539, P10606, O95299, P28331, P00846, O14548, Q9Y487, O43674, Q9H2U2, O15239, O96000, P56134, P09669, P03905, O75438, O43678, P15954, Q93050, P31040, P30049,…	3.49232e-12		hsa00280:Valine, leucine and isoleucine degradation	40	Q01581, P24752, Q13825, P26440, Q99714, Q02252, P09622, P30837, Q96RQ3, P05091, P45954, P05165, O15382, Q9HCC0, P11310, P05166, Q9BWD1, Q08426, P49419, P35914, P51648, Q86V21, P54868, P42765, Q4G176, P11182, P21953, P09110, Q9UKU7, P16219, P31937, Q6NVY1, P49189, P12694, P30084, P40939, P55084, P22033, P55809, Q16836	8.95184e-12		hsa03050:Proteasome	39	P35998, P43686, P48556, P25788, Q13200, O43242, P25789, P25786, P25787, P40306, Q14997, Q99460, Q99436, Q92530, P62195, O00487, Q9Y244, P20618, P28062, P61289, P17980, P55036, P28066, Q9UL46, Q06323, P28074, P28072, P28070, O14818, Q9UNM6, Q15008, P62333, P51665, P60900, P49721, O00231, P49720, P62191, O00232	1.64846e-12
hsa05012:Parkinson's disease	87	O14561, P60604, O14949, Q86Y39, P30405, O00483, P12074, P21796, Q9UDW1, O43181, O95168, P03928, O95169, P18859, Q99643, Q9Y6M9, P17612, P63096, P36542, P22694, P55211, P22695, Q99497, P19404, P47985, P68036, P08574, Q9P0J0, P22314, P51970, O00217, P13073, P24539, P10606, O95299, P62253, P28331, P00846, O14548, Q9Y277, O43674, O15239, O96000, P09669, P45880, P03905, O75438, O43678, P04899, P15954,…	1.31095e-11		hsa00190:Oxidative phosphorylation	82	Q16864, O14561, O14949, O75964, Q86Y39, O00483, Q15181, P12074, Q9UDW1, O43181, O95168, P03928, O95169, P38606, P18859, Q9Y6M9, P36542, P36543, P22695, P19404, P47985, P08574, Q9P0J0, P51970, P56385, O00217, P21283, P21281, P15313, P13073, P24539, P10606, O95299, P28331, P00846, O14548, Q9Y487, Q9H2U2, O15239, O96000, P56134, P09669, P03905, O75438, O43678, P15954, Q93050, P31040, Q9Y5K8, P30049,…	3.08886e-11		hsa04141:Protein processing in endoplasmic reticulum	100	P17655, Q07065, P55735, Q12907, Q9NZL4, P61077, P11142, O94855, Q9UHD9, Q9Y6B6, P60059, Q8NBS9, O60884, Q9UKV5, P14314, Q9UKM7, P08238, Q9P2E9, Q07812, P62253, P07237, Q9H173, P34931, Q9UMX0, O94979, P13667, Q9NXW2, O95757, P14625, P63208, O95816, P53992, P11021, P55072, Q13217, Q9UGP8, Q8TCJ2, P30101, P27824, P19525, Q99442, Q92890, P07384, P30040, Q9Y263, Q12933, P61803, Q15084, Q13438, Q96HE7,…	4.53715e-12
hsa04144:Endocytosis	128	Q99816, Q96QK1, Q9HAU4, O75351, P01130, Q15286, Q9H444, Q8N6H7, Q9BXF6, Q6WKZ4, O60493, P11142, P10316, Q96EY5, Q92538, Q15075, P59998, P10314, Q96J02, O00401, Q9Y6I3, P50570, P46934, Q9Y5X3, O00499, P40818, P61586, Q9BRG1, O95782, P49407, P09497, P09496, Q13596, P34931, P60953, Q9UNH7, P22681, P61026, Q14161, Q9NZD8, Q9NZN4, Q9H223, P52907, P41743, O94973, Q00610, Q15907, Q9UK41, P17066, P53990,…	5.76579e-11		hsa05016:Huntington's disease	107	Q86Y39, O00483, P12074, Q9UDW1, O43181, P03928, P18859, Q9UKL0, P22695, P55211, P47985, P19404, Q9NYC9, P52434, P52435, P08574, Q14790, Q13561, Q00059, O00217, P19388, P19387, P13073, Q07812, P00846, O95782, P09497, P09496, Q9C0G6, P09669, P45880, P15954, P30876, P31040, O14727, O00268, P42858, O94973, P30049, Q00610, P00403, Q16795, O75380, O43920, O75489, P14927, P12236, O95139, P12235, P06576,…	7.08826e-11		hsa03015:mRNA surveillance pathway	63	Q15287, Q66LE6, Q09161, P63151, O94913, Q9HAU5, Q9C0J8, P30154, P30153, Q9UPR3, Q9H0L4, Q16630, P62136, Q96DH6, Q9BZI7, Q8N684, Q9H307, Q96Q15, O43809, Q6UXN9, Q9BRP8, Q10570, P62140, Q13310, Q8IYB3, P62495, Q9UKF6, P51003, Q86US8, P11940, O43148, Q9UKV3, P67775, Q9Y5S9, O60942, Q12996, Q9Y450, Q16537, Q9BRX2, P36873, P33240, Q92797, O00422, Q92989, Q6UN15, Q13362, Q86V81, Q14738, Q92540, P38919,…	1.33246e-11
hsa03015:mRNA surveillance pathway	62	Q15287, Q09161, P63151, O94913, O43347, Q9HAU5, Q9C0J8, P30154, P30153, Q9UPR3, Q9H0L4, Q16630, P62136, Q96DH6, Q9BZI7, Q8N684, Q9H307, Q96Q15, O43809, Q6UXN9, Q9BRP8, Q10570, P62140, Q13310, Q8IYB3, P62495, Q9UKF6, P51003, P11940, O43148, Q9UKV3, P67775, Q9Y5S9, O60942, Q12996, Q9Y450, Q16537, Q9H361, Q9BRX2, P36873, P33240, Q92797, O00422, Q6UN15, Q13362, Q86V81, Q92540, Q14738, P38919, P15170,…	5.95306e-11		hsa04144:Endocytosis	127	Q99816, Q96QK1, Q9Y3E7, O75351, P01130, Q15286, Q9H444, Q8N6H7, Q6WKZ4, O60493, P11142, Q92538, Q15075, P59998, P10314, Q96J02, Q9Y6I3, O00401, Q8IYB5, P50570, P46934, Q9Y5X3, O00499, P40818, P61586, Q9BRG1, O95782, P49407, P09497, P09496, Q13596, P34931, P60953, Q9UNH7, P22681, P61026, Q14161, Q9NZD8, P61020, Q9NZN4, Q9H223, Q05193, P52907, P41743, O94973, Q00610, Q15907, Q9UK41, P17066, P53990,…	9.8366e-11		hsa05012:Parkinson's disease	86	O14561, P60604, O14949, Q86Y39, P30405, O00483, P12074, P21796, Q9UDW1, O43181, O95168, P03928, O95169, P18859, Q9Y6M9, P63096, P36542, P22694, P55211, P22695, Q99497, P19404, P47985, P68036, P08574, Q9P0J0, P22314, P51970, O00217, P13073, P24539, P10606, O95299, P62253, P28331, P00846, O14548, Q9Y277, O43674, O43676, O15239, O96000, P09669, P45880, P03905, O75438, O43678, P04899, P15954, O43464,…	3.96696e-11
hsa03050:Proteasome	37	P35998, P43686, P48556, P25788, Q13200, O43242, P25789, P25786, P25787, Q14997, Q99460, Q92530, P62195, O00487, Q99436, Q9Y244, P20618, P61289, P17980, P55036, P28066, Q9UL46, Q06323, P28074, P28072, P28070, O14818, Q9UNM6, Q15008, P62333, P51665, P60900, P49721, O00231, P49720, P62191, O00232	1.40518e-10		hsa03015:mRNA surveillance pathway	60	Q15287, Q09161, P63151, O94913, Q9HAU5, Q9C0J8, P30154, P30153, Q9UPR3, Q9H0L4, Q16630, P62136, Q96DH6, Q8N684, Q9H307, Q96Q15, O43809, Q6UXN9, Q9BRP8, Q10570, P62140, Q13310, Q8IYB3, P62495, Q9UKF6, P51003, P11940, O43148, Q9UKV3, P67775, Q9Y5S9, O60942, Q12996, Q9Y450, Q16537, Q9BRX2, P36873, P33240, Q92797, O00422, Q92989, Q6UN15, Q13362, Q86V81, Q92540, Q14738, P38919, P15170, Q9P2I0, Q92900,…	7.5717e-10		hsa00280:Valine, leucine and isoleucine degradation	39	Q01581, P24752, Q13825, P26440, Q99714, Q02252, P09622, P30837, Q96RQ3, P05091, P45954, P05165, O15382, Q9HCC0, P11310, P05166, Q9BWD1, Q08426, P49419, P35914, P51648, Q86V21, P42765, Q4G176, P11182, P21953, P09110, Q9UKU7, P16219, P31937, Q6NVY1, P49189, P12694, P30084, P40939, P55084, P22033, P55809, Q16836	7.47635e-11
hsa05010:Alzheimer's disease	96	O14561, P17655, Q14573, P04406, O14949, Q86Y39, Q99714, Q08209, Q01970, O00483, P49810, P12074, Q9UDW1, O43181, O95168, P03928, O95169, Q13564, P18859, Q00535, Q99643, Q9Y6M9, P36542, P55210, P55211, P63098, P22695, P19404, P47985, P08574, Q14790, Q92934, P49841, Q9P0J0, P51970, O00217, P14735, P13073, P24539, P10606, O95299, P28331, P00846, O14548, O43674, O15239, O96000, P09669, O75438, O43678,…	1.68386e-10		hsa05012:Parkinson's disease	81	O14561, O14949, Q86Y39, P30405, O00483, P12074, P21796, Q9UDW1, O43181, O95168, P03928, O95169, P18859, Q9Y6M9, P63096, P36542, P55211, P22695, Q99497, P19404, P47985, P68036, P08574, Q9P0J0, P22314, P51970, O00217, P13073, P24539, P10606, O95299, P62253, P28331, P00846, O14548, Q9Y277, O15239, O96000, P09669, P45880, P03905, O75438, O43678, P04899, P15954, O43464, O14727, P05141, P31040, P30049,…	7.52789e-09		hsa03008:Ribosome biogenesis in eukaryotes	59	Q9Y2P8, Q9H0A0, Q9H0D6, Q9BVP2, Q8NB90, Q9NPE3, Q8N5L8, Q9H583, Q13823, Q9BZE4, Q8NI36, Q9Y3A4, Q9NV31, Q13428, P62826, Q9Y3A5, O75818, O75817, Q9H6R4, Q9Y2X3, Q9BVJ6, O00567, O00566, Q9Y5J1, P22087, Q15061, Q9NU22, Q9Y3B8, Q8TED0, Q9NW13, P56537, Q92979, P19784, Q9NX24, P67870, Q9BUL9, Q14692, Q9ULX3, P68400, Q8IWA0, Q96D46, Q7Z2Z2, Q9UNX4, O60832, O15381, P55769, Q12788, Q99575, Q969X6, Q9NRR4,…	2.41998e-10
hsa01230:Biosynthesis of amino acids	51	P04406, P15104, P31153, P17174, P06733, P48735, O43175, P29401, P17858, Q96AT9, P32929, P11498, Q53H96, P18669, Q96C36, O43837, P09972, P00558, P08237, P49247, P15259, P78330, Q01813, P04075, Q03154, P00505, P04424, P11908, O15382, P13929, P32322, P09104, P51553, P60174, P37837, P00966, Q9Y617, P31327, P34896, P34897, Q96GA7, P54886, Q9NZL9, O75874, P60891, Q8TD30, P14618, P50213, Q99798, O75390,…	5.84034e-10		hsa03018:RNA degradation	51	Q6PGP7, Q9ULM6, Q8IZH2, Q15477, Q9H0D6, Q13868, Q9Y2L1, P06733, Q96DE0, P17858, O95453, A5YKK6, O95777, Q01780, P26196, Q9NQT5, Q9NQT4, Q5RKV6, Q13310, Q06265, P38646, Q9UFF9, P62312, P11940, P08237, P10809, Q15024, Q96C86, O15116, Q9Y3B2, P62310, O75175, Q9H2U1, Q9NPI6, Q01813, Q9NZN8, Q9Y333, Q9H9A5, Q96F86, P42285, Q8TCS8, P13929, Q92600, Q9UK45, Q9GZS3, Q9Y4Y9, Q9NPD3, Q6P2E9, Q86TB9, Q96B26,…	1.94429e-08		hsa05010:Alzheimer's disease	94	O14561, P17655, Q14573, P04406, O14949, Q14571, Q86Y39, Q99714, Q08209, Q01970, O00483, P49810, P12074, Q9UDW1, O43181, O95168, P03928, O95169, Q13564, P18859, Q00535, Q9Y6M9, P36542, P55210, P55211, P63098, P22695, P19404, P47985, P08473, P08574, Q92934, P49841, Q9P0J0, P51970, O00217, P14735, P13073, P24539, P10606, O95299, P28331, P00846, O14548, O43674, O43676, O15239, O96000, P09669, O75438,…	1.38705e-09
hsa03008:Ribosome biogenesis in eukaryotes	58	Q8IZH2, Q9Y2P8, Q9H0A0, Q9H0D6, Q9BVP2, Q8NB90, Q9NPE3, Q8N5L8, Q9H583, Q13823, Q9BZE4, Q8NI36, Q9Y3A4, Q9NV31, Q13428, P62826, Q9Y3A5, O75818, Q9H6R4, Q9Y2X3, Q9BVJ6, O00567, O00566, Q9Y5J1, P22087, Q15061, Q9NU22, Q9Y3B8, Q8TED0, Q9NW13, P56537, Q92979, P19784, Q9NX24, P67870, Q14692, Q9ULX3, P68400, Q8IWA0, Q96D46, Q7Z2Z2, Q9UNX4, O60832, O15381, P55769, Q12788, Q99575, Q969X6, Q9NRR4, Q9UBU9,…	8.87936e-10		hsa03030:DNA replication	30	P35244, P49005, P49643, P35249, P35250, P35251, P28340, Q9NRF9, Q15054, P18858, P49736, P12004, Q14566, P27694, Q07864, P09884, O75792, P39748, P15927, P56282, P25205, P33993, P33992, Q04837, P49642, P33991, Q14181, P40938, P40937, Q5TBB1	2.44842e-08		hsa03030:DNA replication	31	P35244, P49005, P49643, P35249, P35250, P35251, P28340, Q9NRF9, Q15054, P18858, P49736, P12004, Q14566, P27694, Q07864, Q8TDP1, P09884, O75792, P39748, P15927, P56282, P25205, P33993, P33992, Q04837, P49642, P33991, Q14181, P40938, P40937, Q5TBB1	2.96014e-09
hsa00280:Valine, leucine and isoleucine degradation	37	Q01581, P24752, Q13825, P26440, Q99714, Q02252, P09622, P30837, Q96RQ3, P05091, P45954, P05165, O15382, Q9HCC0, P11310, P05166, Q9BWD1, Q08426, P49419, P35914, P51648, Q86V21, Q4G176, P11182, P21953, P09110, P16219, P31937, Q6NVY1, P49189, P12694, P30084, P40939, P55084, P22033, P55809, Q16836	3.5997e-09		hsa01230:Biosynthesis of amino acids	48	P04406, Q01813, P15104, P17174, P31153, P04075, P06733, Q03154, P00505, P48735, P04424, O43175, P29401, P17858, O15382, P13929, P32322, Q96AT9, P32929, P51553, P11498, P60174, Q53H96, P37837, Q9Y617, P00966, P18669, Q96C36, P34896, P34897, Q96GA7, O43837, P54886, P09972, Q9NZL9, P08237, P60891, P00558, O75874, Q8TD30, P49247, P14618, P15259, P50213, Q99798, O75390, P78330, P21399	4.22633e-08		hsa04144:Endocytosis	123	Q99816, Q96QK1, Q9Y3E7, O75351, P01130, Q15286, Q9H444, Q8N6H7, Q6WKZ4, O60493, P11142, Q96EY5, Q92538, Q15075, P59998, Q96J02, Q9Y6I3, Q8IYB5, P50570, P46934, Q9Y5X3, O00499, P40818, Q8WU79, P61586, Q9BRG1, O95782, P49407, P09497, P09496, Q13596, P34931, P60953, Q9UNH7, P22681, P61026, Q14161, Q9NZD8, Q9NP61, P61020, Q9H223, Q05193, P52907, P41743, O94973, Q8NEZ2, Q00610, Q15907, Q9UK41, P53990,…	3.78833e-09
hsa03030:DNA replication	30	P35244, P49005, P49643, P35249, P35250, P35251, P28340, Q9NRF9, P18858, P49736, P12004, Q14566, P27694, Q07864, Q8TDP1, P09884, O75792, P39748, P15927, P56282, P25205, P33993, P33992, Q04837, P49642, P33991, Q14181, P40938, P40937, Q5TBB1	2.47877e-08		hsa05010:Alzheimer's disease	90	O14561, P17655, Q14573, P04406, O14949, Q14571, Q86Y39, Q99714, Q08209, Q01970, O00483, P12074, Q9UDW1, O43181, O95168, P03928, O95169, Q13564, P18859, Q00535, Q9Y6M9, P36542, P55210, P55211, P63098, P22695, P19404, P47985, P08574, Q14790, Q92934, P49841, Q9P0J0, P51970, O00217, P14735, P13073, P24539, P10606, O95299, P28331, P00846, O14548, O15239, O96000, P09669, O75438, O43678, P16615, P16298,…	4.29814e-08		hsa00020:Citrate cycle (TCA cycle)	27	P11498, P40925, P40926, P21912, P53597, P10515, P35558, P48735, O43837, Q02218, P09622, Q9ULD0, P31040, P11177, O75874, Q96I99, P53396, Q16822, P07954, P50213, Q99798, P36957, P08559, O75390, Q9P2R7, P51553, P21399	8.09265e-09
hsa03018:RNA degradation	50	Q6PGP7, Q8IZH2, Q9H0D6, Q13868, Q9Y2L1, P06733, P17858, O95453, A5YKK6, O95777, Q01780, P26196, Q9NQT5, Q9NQT4, Q5RKV6, Q13310, Q06265, P38646, P62312, P11940, P08237, P10809, Q15024, Q96C86, O15116, Q9Y3B2, P62310, Q9H2U1, Q9H361, O75175, Q9NPI6, Q01813, Q9NZN8, Q9Y333, Q9H9A5, Q96F86, P42285, Q8TCS8, P13929, Q92600, P09104, Q9UK45, Q99547, Q9GZS3, Q9Y4Y9, Q9NPD3, Q6P2E9, Q86TB9, Q96B26, Q9Y4Z0	7.52876e-08		hsa03008:Ribosome biogenesis in eukaryotes	54	Q8IZH2, Q9Y2P8, Q9H0A0, Q9H0D6, Q9BVP2, Q8NB90, Q9NPE3, Q9H583, Q13823, Q9BZE4, Q8NI36, Q9Y3A4, Q9NV31, Q13428, P62826, Q9Y3A5, O75818, O75817, Q9H6R4, Q9Y2X3, Q9BVJ6, O00567, O00566, Q9Y5J1, P22087, Q15061, Q9NU22, Q9Y3B8, Q8TED0, Q9NW13, P56537, Q92979, P19784, Q9NX24, Q9BUL9, P67870, Q14692, Q9ULX3, P68400, Q8IWA0, Q96D46, Q7Z2Z2, Q9UNX4, O60832, P55769, Q12788, Q99575, Q969X6, Q9UBU9, Q9H089,…	1.37732e-07		hsa01230:Biosynthesis of amino acids	49	P35520, P04406, Q01813, P15104, P17174, P31153, P04075, P06733, Q03154, P00505, P48735, P04424, O43175, P29401, P17858, P11908, O15382, P13929, P32322, Q96AT9, P09104, P32929, P51553, P11498, P60174, P37837, P00966, Q9Y617, Q96C36, P18669, P34896, P34897, O43837, P54886, P09972, Q9NZL9, P08237, P60891, P00558, O75874, Q8TD30, P49247, P15259, P50213, P14618, Q99798, O75390, P78330, P21399	1.0831e-08
hsa00020:Citrate cycle (TCA cycle)	26	P11498, P40925, P40926, P21912, P53597, P10515, P48735, O43837, Q02218, P09622, P31040, P11177, O75874, Q96I99, P53396, Q99643, Q16822, P50213, P07954, Q99798, P36957, P08559, O75390, P51553, Q9P2R7, P21399	8.35154e-08		hsa00020:Citrate cycle (TCA cycle)	25	P11498, P40925, P40926, P21912, P53597, P10515, P48735, O43837, Q02218, P09622, P31040, P11177, O75874, Q96I99, P53396, Q16822, P50213, P07954, Q99798, P36957, P08559, O75390, P51553, Q9P2R7, P21399	7.06518e-07		hsa03018:RNA degradation	51	Q6PGP7, Q9ULM6, Q15477, Q9H0D6, Q13868, Q9Y2L1, P06733, Q96DE0, P17858, O95453, A5YKK6, O95777, Q01780, P26196, Q9NQT5, Q9NQT4, Q5RKV6, Q13310, Q06265, P38646, P62312, P11940, P08237, P10809, Q15024, Q96C86, O15116, Q9Y3B2, P62310, O75175, Q9H2U1, Q9NPI6, Q01813, Q9NZN8, Q9Y333, Q9H9A5, Q96F86, P42285, Q8TCS8, P13929, Q92600, P09104, Q9UK45, Q99547, Q9GZS3, Q9Y4Y9, Q9NPD3, Q6P2E9, Q86TB9, Q96B26,…	1.8348e-08
hsa05100:Bacterial invasion of epithelial cells	49	P12931, Q9UHD8, P60709, P35221, Q9Y6W5, Q03135, P27986, P12830, P59998, P29353, O00401, P05556, P50570, Q15019, P63000, Q96JJ3, P61586, Q13418, Q9UH03, O00459, P09497, P09496, Q92747, P18206, P60953, P22681, P08581, Q9NVA2, Q9Y5K6, P35222, Q96BJ8, P56945, P46109, P84095, Q00610, P46108, O15144, O15145, O15143, Q92558, Q9ULV8, Q05397, P49023, P42338, Q14185, P63261, Q92599, P26232, Q14247	4.72694e-07		hsa00240:Pyrimidine metabolism	58	P17812, O75356, P33316, Q9NWZ5, Q9H0P0, P49643, P11172, P50583, P31350, P36954, O14802, Q9H773, Q9NW08, Q9NRF8, Q9NRF9, P04183, Q8TCD5, Q9H9Y6, P52434, Q07864, Q9NVU0, P52435, P49902, Q8WVQ1, P19388, P19387, P24928, P23921, P23919, O15160, P21589, P49005, P30085, P62487, P30876, Q9Y2S0, P62875, P00491, P22392, Q8TCS8, P27707, P28340, P27708, Q15054, O95602, P32321, Q02127, Q9GZS1, Q9BZX2, Q13232,…	1.60381e-06		hsa00240:Pyrimidine metabolism	59	P17812, P33316, Q9NWZ5, Q9H0P0, P49643, P11172, P50583, P31350, P36954, O14802, Q9H773, Q9NW08, Q9NRF8, Q9NRF9, P04183, Q8TCD5, Q9H9Y6, P52434, Q07864, Q9NVU0, P52435, P49902, Q8WVQ1, O15514, P19388, P19387, P24928, P23921, P23919, Q16831, O15160, P49005, P30085, P62487, P30876, Q9Y2S0, P62875, P00491, P22392, Q8TCS8, P27707, P28340, P27708, Q15054, O95602, P32321, P32320, Q02127, Q9GZS1, Q9BZX2,…	6.74708e-07
hsa00240:Pyrimidine metabolism	59	P17812, P33316, Q9NWZ5, Q9H0P0, P49643, P11172, P50583, P31350, P36954, O14802, Q9H773, Q9NW08, Q9NRF8, Q9NRF9, P04183, Q8TCD5, Q9H9Y6, P52434, Q07864, Q9NVU0, P52435, P49902, Q8WVQ1, O15514, P19388, P19387, P24928, P23921, P23919, O15160, P21589, P49005, P30085, P62487, P30876, Q9Y2S0, P62875, P00491, P22392, Q8TCS8, P27707, P28340, P27708, O95602, P19971, P32321, P32320, Q02127, Q9GZS1, Q9BZX2,…	6.20815e-07		hsa05100:Bacterial invasion of epithelial cells	47	Q92747, P18206, P12931, P60953, Q9UHD8, P22681, P08581, Q9NVA2, P60709, Q9Y6W5, P35221, Q9Y5K6, P35222, Q05193, Q96BJ8, P46109, P56945, P27986, P12830, P84095, Q00610, P59998, P46108, P29353, O00401, Q9BPX5, O15144, P05556, O15145, O15143, P50570, Q15019, P63000, Q92558, Q9ULV8, Q05397, P42338, P49023, Q13418, P61586, Q14185, P63261, P09497, Q92599, P09496, P26232, Q14247	4.47743e-06		hsa05130:Pathogenic Escherichia coli infection	35	Q92747, P07437, P04350, O43639, Q71U36, P60953, Q3ZCM7, P17252, P60709, P35222, P68371, P15311, P12830, P68366, Q9BQE3, P06241, P59998, Q9BUF5, Q13509, Q9BPX5, Q92974, P05556, O15144, O15145, O15143, Q13464, Q9BVA1, P61586, P63261, O75116, Q13885, P16333, P19338, Q9H4B7, Q14247	2.95099e-06
hsa04932:Non-alcoholic fatty liver disease (NAFLD)	76	O14561, O14949, Q86Y39, O00483, P12074, Q9UDW1, O43181, O95168, P27986, O95169, P54619, Q99643, Q9Y6M9, P55210, Q96J02, P22695, P19404, P47985, P08574, Q14790, P49841, Q9P0J0, P51970, O00217, P63000, P13073, P10606, O95299, P28331, Q04206, O14548, O00459, P45983, O43674, O15239, P60953, O96000, P09669, O75438, O43678, P15954, P31040, P31751, P00403, O75380, Q9Y478, P49840, Q16795, O43920, O95182,…	2.17634e-05		hsa04520:Adherens junction	43	P19784, P46940, P18206, Q92692, P12931, P60953, P08581, P23467, P60709, P67870, Q9UQB8, Q9Y6W5, P35221, P68400, P35222, P55196, P12814, O43318, P10586, P12830, P29350, P15153, O60716, P04626, P28482, P60763, O43707, P07947, Q07157, O00401, Q08043, Q09472, Q8WWI1, P27361, P18031, P63000, P08069, Q92558, Q15796, P61586, P63261, P00533, P26232	1.23642e-05		hsa03420:Nucleotide excision repair	33	Q16531, Q92889, P51946, P35244, P49005, Q01831, P35249, P50613, P35250, P35251, P28340, Q9NRF9, Q92466, Q15054, P62877, P51948, P18858, Q13619, P12004, P27694, Q07864, Q92759, P56282, P15927, P54727, P32780, Q13620, P18074, P54725, P28715, P40938, P40937, Q13889	3.06532e-06
hsa00071:Fatty acid degradation	29	P24752, P49748, P42126, O95573, P33121, P11766, P30837, P05091, P45954, Q9ULC5, P11310, P23786, Q9BWD1, Q92947, Q08426, P49419, O75521, P51648, P09110, P16219, P49189, P50416, P30084, P40939, P55084, O15254, Q16836, O60488, Q15067	3.15189e-05		hsa00520:Amino sugar and nucleotide sugar metabolism	32	Q9NR45, Q16851, Q16222, Q06210, O60547, O95394, P07686, P46926, Q3KQV9, Q8N0W3, Q8NFW8, Q96IJ6, P07902, Q9UJ70, P52789, Q9Y223, Q14376, O15305, P51570, Q9Y5P6, P06865, O60701, O94808, P34949, P06744, Q13630, P19367, Q2TB90, P36871, Q96G03, Q96EK6, P00387	2.28401e-05		hsa00071:Fatty acid degradation	29	P24752, P49748, P42126, O95573, P33121, P11766, P30837, P05091, P45954, P11310, P23786, Q9BWD1, Q92947, Q08426, P49419, O75521, P51648, P42765, P09110, P16219, P49189, P50416, P30084, P40939, P55084, O15254, Q16836, O60488, Q15067	3.21715e-05
hsa05131:Shigellosis	39	Q92747, P18206, P12931, P60953, O60610, P60709, Q9Y6W5, P53778, Q01081, O15111, P07737, Q96BJ8, P46109, P84095, P28482, Q9H1Y0, P59998, P46108, Q9Y6K9, O00401, O15144, P05556, O15145, O15143, Q13464, P27361, P19838, P63000, Q96JJ3, Q92558, Q14185, Q04206, P63261, O75116, P35080, Q16539, P16070, P45983, Q14247	3.7591e-05		hsa00071:Fatty acid degradation	29	P24752, P49748, P42126, O95573, P33121, P11766, P30837, P05091, P45954, Q9ULC5, P11310, P23786, Q9BWD1, Q92947, Q08426, P49419, P51648, P42765, P09110, P16219, P49189, P50416, P30084, P40939, P55084, O15254, Q16836, O60488, Q15067	2.71142e-05		hsa00620:Pyruvate metabolism	28	P24752, P23368, P07311, P09622, P30837, P05091, Q16775, Q9BWD1, Q16822, P08559, P49419, P11498, Q9NR19, P40925, P51648, P40926, P00338, P10515, Q04760, P35558, P07195, P48163, P11177, Q13085, P49189, Q9UBQ7, P07954, P14618	3.24017e-05
hsa05130:Pathogenic Escherichia coli infection	33	Q92747, P07437, P04350, O43639, Q71U36, P60953, Q3ZCM7, P17252, P60709, P35222, P68371, P15311, P12830, P68366, Q9BQE3, P59998, Q9BUF5, O00401, Q13509, Q92974, P05556, O15144, O15145, O15143, Q13464, P61586, P63261, O75116, Q13885, P16333, P19338, Q9H4B7, Q14247	4.10701e-05		hsa00010:Glycolysis / Gluconeogenesis	40	P09467, P04406, Q01813, P04075, P06733, Q96C23, P09622, P11766, P30837, P17858, P05091, P30838, P13929, P52789, Q16822, Q9BRR6, P08559, O00757, P49419, P60174, P51648, P18669, Q9NUB1, P10515, P00338, P06744, P07195, P19367, Q2TB90, P09972, P11177, P36871, P08237, P00558, P49189, Q96G03, Q9UNW1, P14550, P14618, P15259	4.64133e-05		hsa00520:Amino sugar and nucleotide sugar metabolism	31	Q9NR45, Q16851, Q16222, Q06210, O95394, O60547, P07686, P46926, Q3KQV9, Q8N0W3, Q8NFW8, Q96IJ6, P07902, Q9UJ70, P52789, Q14376, O15305, P51570, Q9Y5P6, P06865, O60701, O94808, P34949, P06744, Q13630, P19367, Q2TB90, P36871, Q96G03, Q96EK6, P00387	9.47732e-05
hsa03420:Nucleotide excision repair	31	P27694, Q16531, Q92759, Q07864, Q92889, P51946, P35244, P49005, Q01831, P35249, P50613, P15927, P56282, P54727, P32780, Q13620, P35250, P18074, P35251, Q92466, Q9NRF9, P28340, P54725, P62877, P18858, P51948, P40938, P40937, Q13619, P12004, Q13889	4.78062e-05		hsa01212:Fatty acid metabolism	31	P24752, P49748, O95573, P33121, Q9BY49, P45954, P50897, Q9ULC5, P11310, P23786, Q9BWD1, Q8IVS2, Q08426, Q9NZ01, P42765, Q9NWU1, P49327, Q9P035, P09110, P16219, Q13085, Q9BV79, P50416, P30084, P40939, P55084, O15254, Q16836, O60488, Q15067, Q53GQ0	7.99783e-05		hsa05100:Bacterial invasion of epithelial cells	44	Q92747, P18206, P12931, P60953, Q9UHD8, P22681, P08581, Q9NVA2, P60709, Q9Y6W5, P35221, Q9Y5K6, P35222, Q14141, Q05193, P46109, P56945, P27986, P12830, P84095, Q00610, P59998, P46108, P29353, Q9BPX5, O15144, P05556, O15145, O15143, P50570, Q15019, P63000, Q92558, Q05397, P42338, P49023, Q13418, P61586, P63261, P09497, Q92599, P09496, P26232, Q14247	0.000119415
hsa01212:Fatty acid metabolism	31	P24752, P49748, O95573, P33121, Q9BY49, P45954, P50897, Q9ULC5, P11310, P23786, Q9BWD1, Q8IVS2, Q08426, Q9NZ01, Q9NWU1, P49327, Q9P035, P09110, P16219, Q13085, Q9BV79, P50416, P30084, P40939, P55084, O15254, O00767, Q16836, O60488, Q15067, Q53GQ0	8.61958e-05		hsa05131:Shigellosis	38	Q92747, P18206, P12931, P60953, O60610, P60709, Q9Y6W5, Q01081, O15111, P07737, Q96BJ8, P46109, P84095, P28482, Q9H1Y0, P59998, P46108, Q9Y6K9, O00401, Q9BPX5, O15144, P05556, Q15653, O15145, O15143, Q13464, P27361, P19838, P63000, Q92558, Q14185, Q04206, P63261, O75116, P35080, Q16539, P16070, Q14247	9.44727e-05		hsa04120:Ubiquitin mediated proteolysis	68	Q14999, Q16531, Q15369, Q9NR09, P60604, Q9H1A4, Q13042, Q14145, O60291, Q14669, Q93034, P61077, O00308, P49459, Q92466, P61081, Q712K3, Q15370, Q9UK22, Q14139, O95071, Q13616, Q13617, P30260, Q13618, Q13619, Q15386, Q9UBT2, Q96J02, P68036, P63146, P22314, P40337, P46934, Q13620, P62253, P98170, P62256, Q9H832, O95155, O75925, P51668, Q9UJX3, Q9UJX4, Q9C0C9, Q9UJX5, P22681, Q9UMS4, Q13356, Q9UJX2,…	0.000127382
hsa00520:Amino sugar and nucleotide sugar metabolism	31	Q9NR45, Q16851, Q8TDQ7, Q16222, Q06210, O95394, P07686, P46926, Q3KQV9, Q8N0W3, Q8NFW8, Q96IJ6, P07902, Q9UJ70, P52789, Q9Y223, Q14376, O15305, P51570, Q9Y5P6, P06865, O60701, O94808, P34949, P06744, Q13630, P19367, P36871, Q96G03, Q96EK6, P00387	8.61958e-05		hsa00620:Pyruvate metabolism	27	P24752, P23368, P07311, P09622, P30837, P05091, Q16775, Q9BWD1, Q16822, P08559, P49419, P11498, P51648, P40925, P40926, Q9NUB1, P00338, P10515, Q04760, P07195, P48163, P11177, Q13085, P49189, Q9UBQ7, P07954, P14618	0.000108615		hsa00010:Glycolysis / Gluconeogenesis	39	P04406, Q01813, P04075, P06733, Q96C23, P09622, P11766, P30837, P17858, P05091, P13929, P52789, Q16822, P09104, Q9BRR6, P08559, P49419, Q9NR19, P60174, P51648, P18669, P10515, P00338, P35558, P06744, P07195, P19367, Q2TB90, P09972, P11177, P36871, P08237, P00558, P49189, Q96G03, Q9UNW1, P14550, P15259, P14618	0.000149086
hsa04520:Adherens junction	41	P19784, P46940, P18206, Q92692, P12931, P60953, P08581, P60709, P67870, Q9UQB8, Q9Y6W5, P35221, P68400, P35222, P55196, P12814, O43318, P10586, P29350, P12830, P15153, O60716, P28482, P60763, O43707, P07947, Q07157, O00401, Q9NQB0, Q08043, Q09472, P27361, P18031, P63000, Q92558, Q15796, Q13485, P61586, P63261, P00533, P26232	0.000108564		hsa03420:Nucleotide excision repair	30	P27694, Q16531, Q92759, Q07864, Q92889, P51946, P35244, P49005, Q01831, P35249, P50613, P15927, P56282, P54727, P32780, Q13620, P35250, P18074, P35251, Q9NRF9, P28340, P54725, P62877, Q15054, P18858, P51948, P40938, P40937, Q13619, P12004	0.000146586		hsa00970:Aminoacyl-tRNA biosynthesis	38	P56192, Q9UGM6, P14868, Q96I59, P47897, Q9NP81, P54136, Q5ST30, Q15031, Q9H0R6, Q5JTZ9, Q9Y285, Q9HA77, Q5T160, P49589, Q9Y2Z4, P49588, Q96GW9, P26639, P41252, Q9NSE4, P41250, P54577, Q6PI48, Q7L3T8, O75879, Q5JPH6, P26640, O43776, Q15046, Q9BW92, P49590, P07814, O95363, Q9NSD9, Q9P2J5, P49591, P23381	0.000265342
hsa00620:Pyruvate metabolism	27	P24752, P23368, P07311, P09622, P30837, P05091, Q16775, Q9BWD1, Q16822, P08559, P49419, P11498, Q9NR19, P51648, P40925, P40926, P00338, P10515, Q04760, P07195, P48163, P11177, Q13085, P49189, Q9UBQ7, P07954, P14618	0.000112242		hsa03060:Protein export	18	Q9Y5M8, P60059, P61011, P09132, Q99442, P61009, P67812, P61619, O76094, P49458, Q15070, Q9H9S3, P37108, P11021, P08240, Q15005, Q9UHB9, Q9UGP8	0.000290341		hsa01212:Fatty acid metabolism	30	P24752, P49748, O95573, P33121, Q9BY49, P45954, P50897, P11310, P23786, Q9BWD1, Q8IVS2, Q08426, Q9NZ01, P42765, Q9NWU1, P49327, Q9P035, P09110, P16219, Q13085, Q9BV79, P50416, P30084, P40939, P55084, O15254, Q16836, O60488, Q15067, Q53GQ0	0.000285164
hsa04120:Ubiquitin mediated proteolysis	68	Q14999, Q16531, Q15369, Q9NR09, P60604, Q9H1A4, Q9HAU4, Q13042, Q14669, Q93034, P61077, O00308, P49459, Q92466, P61081, Q15370, Q712K3, Q9UK22, Q14139, O95071, Q13616, Q13617, P30260, Q13618, Q13619, Q15386, Q9UBT2, Q96J02, P68036, P22314, P40337, P46934, Q13620, Q96PU5, P62253, P98170, P62256, Q9H832, O95155, O75925, Q13049, P51668, Q9UJX3, Q9UJX4, Q9C0C9, Q9UJX5, P22681, Q9UMS4, Q13356, Q9UJX2,…	0.000114895		hsa05130:Pathogenic Escherichia coli infection	31	Q92747, P07437, P04350, P60953, Q3ZCM7, P17252, P60709, P35222, P68371, P15311, P12830, P68366, Q9BQE3, P59998, O00401, Q13509, Q9BPX5, Q92974, P05556, O15144, O15145, O15143, Q13464, P61586, P63261, O75116, Q13885, P16333, P19338, Q9H4B7, Q14247	0.000367139		hsa03430:Mismatch repair	18	P27694, P54278, P52701, P35244, P49005, P35249, P15927, P20585, Q04837, P35250, P35251, P28340, Q15054, P18858, P40938, P40937, P43246, P12004	0.000306028
hsa00230:Purine metabolism	82	P07741, P12268, P49915, P49643, Q9H0P0, P49789, P50583, P31350, Q9Y2T3, P36954, O14802, Q16774, Q9NW08, P54819, Q9NRF9, P00568, P55263, Q01433, P36959, Q8TCD5, Q9H9Y6, Q07864, P52434, P52435, Q9NVU0, P49902, Q8WVQ1, Q9Y6X5, O15514, P19388, P24928, P19387, P20839, P23921, P27144, Q86TP1, P36871, Q96G03, O15067, O15160, Q9UIJ7, Q9BSD7, P21589, P30520, P49005, Q9BY32, P62487, P30566, P30876, P11908,…	0.000238918		hsa04932:Non-alcoholic fatty liver disease (NAFLD)	71	O14561, O14949, Q86Y39, O00483, P12074, Q9UDW1, O43181, P27986, O95168, O95169, P54619, Q9Y6M9, P55210, Q96J02, P22695, P19404, P47985, P08574, Q14790, P49841, Q9P0J0, P51970, O00217, P63000, P13073, P10606, O95299, Q07812, P28331, Q04206, O14548, O15239, P60953, O96000, P09669, O75438, O43678, P15954, P31040, P31751, P00403, O75380, Q9Y478, P49840, Q16795, O43920, O95182, Q13131, P19793, P14406,…	0.000521221		hsa04932:Non-alcoholic fatty liver disease (NAFLD)	72	O14561, O14949, Q86Y39, O00483, P12074, Q9UDW1, O43181, P27986, O95168, O95169, P54619, Q9Y6M9, P55210, Q96J02, P22695, P19404, P47985, P08574, P49841, Q9P0J0, P51970, O00217, P63000, P13073, P10606, O95299, Q07812, P28331, Q04206, O14548, O43674, O43676, O15239, P60953, O96000, P09669, O75438, O43678, P15954, P31040, P31751, P00403, O75380, Q9Y478, P49840, Q16795, O43920, O95182, P56181, Q13131,…	0.000322488
hsa05211:Renal cell carcinoma	38	Q15369, P60953, P08581, Q02750, P10398, Q9NQU5, P11166, Q13905, P46109, P27986, P62993, Q15370, Q06124, P62877, P31751, P28482, Q13617, P36507, P46108, P62834, P61224, P15056, Q09472, Q13153, O96013, P40337, P27361, Q13177, Q07889, P63000, P04049, Q9GZT9, P42338, P07954, P01116, O00459, P01111, P31749	0.000243137		hsa00051:Fructose and mannose metabolism	22	P60174, P09467, Q9Y5P6, Q01813, P04075, Q00796, O60547, O60218, P34949, Q13630, Q8N0W3, O60825, P19367, Q2TB90, P17858, Q96IJ6, P09972, P08237, P52789, O15305, Q9NQ88, O00757	0.00053699		hsa03060:Protein export	17	Q9Y5M8, P60059, P61011, P09132, Q99442, P61009, P67812, P61619, O76094, P49458, Q15070, P37108, P11021, P08240, Q15005, Q9UHB9, Q9UGP8	0.00155208
hsa00970:Aminoacyl-tRNA biosynthesis	38	P56192, Q9UGM6, P14868, Q96I59, P47897, Q9NP81, P54136, Q5ST30, Q15031, Q9H0R6, Q5JTZ9, Q9Y285, Q9HA77, Q5T160, P49589, Q9Y2Z4, P49588, Q96GW9, P26639, P41252, Q9NSE4, P41250, P54577, Q6PI48, Q7L3T8, O75879, Q5JPH6, P26640, O43776, Q15046, Q9BW92, P49590, P07814, O95363, Q9NSD9, Q9P2J5, P49591, P23381	0.000243137		hsa00230:Purine metabolism	79	O75356, P07741, P12268, Q96DE0, P49915, P49643, Q9H0P0, P50583, P31350, P36954, Q9Y2T3, O14802, Q16774, Q9NW08, P54819, Q9NRF9, P00568, P55263, Q01433, Q8TCD5, Q9H9Y6, Q07864, P52434, P52435, Q9NVU0, P49902, Q8WVQ1, Q9Y6X5, P19388, P24928, P19387, P20839, P23921, P27144, P36871, Q96G03, O15067, O15160, Q9UIJ7, Q9BSD7, P21589, P30520, P49005, Q9BY32, P62487, P30566, P30876, Q9Y2S0, P62875, P00492,…	0.00121164		hsa00270:Cysteine and methionine metabolism	24	P25325, P35520, P40925, P40926, Q9Y6K1, P26358, Q96GX9, P19623, P31153, P17174, P00338, P00505, P07195, P23526, O43865, Q9BV57, Q9BV20, Q96HN2, Q9NZL9, Q16762, P52788, P32929, Q9UHY7, Q13126	0.00156951
hsa00010:Glycolysis / Gluconeogenesis	38	P04406, Q01813, P47895, P04075, P06733, Q96C23, P09622, P11766, P30837, P17858, P05091, P13929, P52789, Q16822, P09104, Q9BRR6, P08559, P49419, Q9NR19, P60174, P51648, P18669, P10515, P00338, P06744, P07195, P19367, P09972, P11177, P36871, P08237, P00558, P49189, Q96G03, Q9UNW1, P14550, P14618, P15259	0.000357907		hsa00030:Pentose phosphate pathway	20	P37837, P09467, Q01813, P04075, P06744, Q9Y315, P29401, P17858, P09972, O95479, P36871, O95336, P08237, P60891, Q96G03, P52209, P11413, P49247, Q96AT9, O00757	0.00121439		hsa00230:Purine metabolism	79	P07741, P12268, Q96DE0, P49915, Q9H0P0, P49643, P50583, P31350, P36954, O14802, Q16774, Q9NW08, P54819, Q9NRF9, P00568, P55263, Q01433, Q8TCD5, Q9H9Y6, Q07864, P52434, P52435, Q9NVU0, P49902, Q8WVQ1, Q9Y6X5, O15514, P19388, P24928, P19387, P20839, P23921, P27144, Q86TP1, P36871, Q96G03, O15067, O15160, Q9UIJ7, Q9BSD7, P30520, P49005, Q9BY32, P62487, P30566, P30876, P11908, Q9Y2S0, P62875, P00492,…	0.00158763
hsa05169:Epstein-Barr virus infection	59	P48556, O43242, Q13200, Q9UHD2, Q92769, Q13573, Q99460, P53778, O00487, O43318, P27986, P10316, P16885, P13747, P10314, P16188, P06400, P46934, Q93009, O95786, Q15628, Q15008, Q04206, P45985, P51665, Q16539, O00459, P62191, P45983, P43686, P35998, Q06330, P62195, O15111, Q13547, Q13546, Q00653, P51617, P31751, P17980, P55036, P46734, Q9Y6K9, P07948, P23458, P19525, Q15750, P19838, P24941, Q12933,…	0.00102231		hsa03430:Mismatch repair	17	P27694, P52701, P35244, P49005, P35249, P15927, P20585, Q04837, P35250, P35251, P28340, Q15054, P18858, P40938, P40937, P43246, P12004	0.00136094		hsa05203:Viral carcinogenesis	89	Q16531, P12931, Q92769, Q13573, Q96EY1, O00571, P31946, P27986, P62993, Q08AM6, Q00534, O43707, P61978, P22694, P06400, P49137, Q8WUI4, O14757, Q92934, Q5T4S7, Q93009, P63000, P16220, P04637, P32780, Q07812, P62258, Q9BY41, P61586, Q15628, Q04206, P62191, Q9Y277, Q12959, Q00403, P60953, Q9UBN7, Q14160, O15379, P29084, P29083, Q06330, P06493, P43487, O00463, P61981, P12814, Q13547, Q7KZF4, P27348,…	0.00223619
hsa04919:Thyroid hormone signaling pathway	56	P42224, P12931, Q92769, P60709, P49815, Q01970, Q9Y6Q9, Q9UHV7, P11166, P27986, O15530, P16885, Q15382, P17612, P36507, P05023, P22694, P55211, P05026, O60343, Q92934, Q96ST3, P49841, O60244, Q9NVC6, O00459, P17252, O75376, O15379, Q02750, P35222, Q93074, Q13547, P06756, P50993, P28702, P31751, P28482, P42345, Q9NPJ6, P19793, Q09472, Q8N3E9, P54709, P19174, P27361, O60825, O75448, P04049, P42338,…	0.00121069		hsa00970:Aminoacyl-tRNA biosynthesis	36	P56192, Q9UGM6, P14868, Q96I59, P47897, Q9NP81, P54136, Q15031, Q9H0R6, Q5JTZ9, Q9Y285, Q9HA77, Q5T160, P49589, Q9Y2Z4, P49588, Q96GW9, P26639, P41252, Q9NSE4, P41250, P54577, Q6PI48, Q7L3T8, Q5JPH6, P26640, O43776, Q15046, Q9BW92, P49590, P07814, O95363, Q9NSD9, Q9P2J5, P49591, P23381	0.00136708		hsa00640:Propanoate metabolism	19	P24752, Q9NR19, P53597, Q9NTX5, P00338, Q02252, P07195, P05165, Q13085, P11310, Q6NVY1, P05166, P30084, Q9BWD1, P40939, P22033, Q96I99, Q08426, Q9P2R7	0.00258784
hsa03060:Protein export	17	Q9Y5M8, P60059, P61011, P09132, Q99442, P61009, P67812, P61619, O76094, P49458, Q15070, P37108, P11021, P08240, Q15005, Q9UHB9, Q9UGP8	0.00145049		hsa00640:Propanoate metabolism	19	P24752, Q9NUB1, P53597, Q9NTX5, P00338, Q02252, P07195, P05165, Q13085, P11310, Q6NVY1, P05166, P30084, Q9BWD1, P40939, Q96I99, P22033, Q08426, Q9P2R7	0.00232679		hsa04110:Cell cycle	58	Q9H1A4, Q13042, Q92769, P31947, P31946, Q14674, Q13616, P30260, Q00534, Q9UQE7, Q14566, P06400, O14757, P49841, P04637, P14635, O60216, P62258, Q8WVM7, Q14683, Q13416, Q9UJX3, Q9UJX4, Q13257, Q9UJX5, Q16254, O43929, P51946, Q9UBD5, P06493, P61981, O60566, P50613, P78527, Q9UJX2, Q13315, Q13547, P27348, P33981, P63208, P62877, P49736, P12004, P63104, O43684, Q9Y6D9, Q09472, O96017, P24941, Q8N3U4,…	0.00322551
hsa04012:ErbB signaling pathway	44	O43639, P12931, P23443, P22681, P17252, Q02750, P10398, Q9NQU5, P46109, P27986, P62993, P42684, P16885, P31751, P28482, P42345, P36507, P46108, P29353, P15056, Q13153, P49841, Q92934, O96013, P19174, Q13541, P27361, Q13177, Q07889, P04049, Q9ULV8, Q05397, P42338, Q13555, P45985, P01116, P16333, O00459, O14733, P00533, P01111, Q13557, P31749, P45983	0.00240346		hsa04146:Peroxisome	42	P51659, Q96K12, P43155, P39210, O95573, P56589, P48735, P04040, Q9BTZ2, P33121, Q9BY49, A8MXV4, P34913, Q9ULC5, P30044, P22307, Q9BQG2, O43808, Q08426, P35914, O96011, Q8WVX9, P40855, Q03426, Q13011, Q9Y5Y5, P28288, O15228, O14975, P09110, Q9NR77, Q9Y2Q3, O00116, Q15126, O75874, P04179, O15254, Q13608, O60488, Q15067, Q9UJ83, O14734	0.00282383		hsa05211:Renal cell carcinoma	35	Q15369, P60953, P08581, Q02750, P10398, P11166, Q13905, P46109, P27986, P62993, Q15370, Q06124, P62877, P31751, P28482, Q13617, P36507, P46108, P15056, P61224, Q09472, Q13153, O96013, P40337, P27361, Q13177, Q07889, P63000, P04049, Q9GZT9, P42338, P07954, P01116, P01111, P31749	0.00368747
hsa00640:Propanoate metabolism	19	P24752, Q9NR19, P53597, Q9NTX5, P00338, Q02252, P07195, P05165, Q13085, P11310, Q6NVY1, P05166, P30084, Q9BWD1, P40939, P22033, Q96I99, Q08426, Q9P2R7	0.00248937		hsa05230:Central carbon metabolism in cancer	34	O15427, Q01813, P08581, Q02750, Q01650, P17858, P11166, P27986, Q15758, P52789, P04626, P31751, P28482, P42345, P08559, P36507, Q9NTG7, P18669, O94925, P27361, P19367, Q2TB90, P04637, P11177, P08237, P42338, P11413, P14618, P15259, P01116, Q9NQ88, P00533, P01111, P31749	0.0037694		hsa05230:Central carbon metabolism in cancer	34	O15427, Q01813, P08581, Q02750, Q01650, P17858, P11166, P27986, Q15758, P52789, P31751, P28482, P42345, P08559, P36507, Q9NTG7, P18669, O94925, P27361, P19367, Q2TB90, P04637, P04049, P11177, P08237, P42338, P11413, P15259, P14618, P01116, P60484, Q9NQ88, P01111, P31749	0.00423644
hsa04810:Regulation of actin cytoskeleton	90	P46940, Q9NYB9, O60610, P12931, P62070, P60709, Q9Y6W5, P10398, P23528, P62136, P26006, P18084, P07737, P27986, P15311, P15153, P62328, Q9Y2X7, P59998, P78356, O43707, P36507, O00401, P15056, Q13153, P05556, P62140, Q9Y281, P26038, P52735, Q13464, Q07889, O14950, P63000, Q14344, P61586, P48426, O00459, Q92747, Q92888, P18206, P60953, P36873, Q9UQB8, Q02750, Q96F07, Q9NQU5, Q9NZN5, Q8TBX8, P12814,…	0.0031019		hsa04810:Regulation of actin cytoskeleton	89	P46940, Q9NYB9, O60610, P12931, P62070, P60709, Q9Y6W5, P10398, P23528, P62136, P26006, P18084, P07737, P27986, P15311, P18564, P15153, Q9Y2X7, P59998, P78356, O43707, P36507, O00401, P15056, Q9BPX5, Q13153, P05556, P62140, P26038, P52735, Q13464, P22455, Q07889, O14950, P63000, Q14344, P61586, P48426, Q92747, Q92888, Q03113, P18206, P60953, P36873, Q9UQB8, Q02750, Q9NZN5, Q8TBX8, P12814, P19105,…	0.00401718		hsa00030:Pentose phosphate pathway	19	P37837, Q01813, P04075, P06744, Q9Y315, P29401, P17858, P09972, P11908, O95479, P36871, O95336, P08237, P60891, Q96G03, P52209, P11413, P49247, Q96AT9	0.00436511
hsa04370:VEGF signaling pathway	33	P60953, P12931, P17252, Q08209, Q02750, P53778, P16298, P27986, Q16644, P15153, P16885, P31751, P28482, P60763, P36507, P55211, P63098, Q92934, P48454, P19174, P27361, P47712, P63000, P04049, Q05397, P42338, P49023, O00459, Q16539, P01116, P04792, P01111, P31749	0.0033777		hsa00270:Cysteine and methionine metabolism	23	P25325, P40925, P40926, P26358, Q96GX9, P19623, P31153, P17174, P00338, Q96GA7, P00505, P07195, P23526, O43865, Q9BV57, Q9BV20, Q96HN2, Q9NZL9, Q16762, P52788, P32929, Q9UHY7, Q13126	0.00404775		hsa00630:Glyoxylate and dicarboxylate metabolism	18	P24752, P40925, P40926, A6NDG6, P15104, P34896, P48728, P34897, P09622, P23434, P05165, P05166, Q9BWD1, P22033, Q9UBQ7, Q99798, O75390, P21399	0.00476682
hsa05230:Central carbon metabolism in cancer	34	O15427, Q01813, P08581, Q02750, Q01650, P17858, P11166, P27986, Q15758, P52789, P31751, P28482, P42345, P08559, P36507, Q9NTG7, P18669, O94925, P27361, P19367, P04049, P11177, P08237, P42338, P11413, P14618, P15259, P01116, P60484, O00459, Q9NQ88, P00533, P01111, P31749	0.00406033		hsa04120:Ubiquitin mediated proteolysis	62	Q14999, Q16531, Q15369, Q9NR09, Q9H1A4, Q13042, Q14145, Q14669, Q93034, P61077, O00308, P49459, P61081, Q712K3, Q15370, Q14139, O95071, Q13616, Q13617, P30260, Q13618, Q13619, Q15386, Q9UBT2, Q96J02, P68036, P22314, P40337, P46934, Q13620, Q96PU5, P62253, P62256, Q9H832, O95155, O75925, P51668, Q9UJX3, Q9UJX4, Q9C0C9, Q9UJX5, P22681, Q9UMS4, Q13356, P63208, P62877, O95714, Q05086, A0AVT1, Q15751,…	0.00423857		hsa00051:Fructose and mannose metabolism	20	P60174, Q9Y5P6, Q01813, P04075, Q00796, O60547, P34949, Q13630, Q8N0W3, O60825, P19367, Q2TB90, P17858, Q96IJ6, P09972, P08237, P52789, P15121, O15305, Q9NQ88	0.00616059
hsa00920:Sulfur metabolism	9	P25325, Q9Y6N5, O95861, Q16762, O95340, Q9NX62, O95571, P51687, O43252	0.00406696		hsa00630:Glyoxylate and dicarboxylate metabolism	18	P24752, P40925, P40926, A6NDG6, P15104, P34896, P34897, P04040, P09622, P23434, P05165, P05166, Q9BWD1, P22033, Q9UBQ7, Q99798, O75390, P21399	0.00432464		hsa04146:Peroxisome	41	P51659, P43155, P39210, O95573, P56589, P48735, Q9BTZ2, P33121, Q9BY49, A8MXV4, P34913, P30044, P22307, Q9BQG2, O43808, Q08426, P35914, O75521, O96011, Q8WVX9, P40855, Q03426, Q13011, Q9Y5Y5, P28288, O15228, O14975, P09110, Q9NR77, Q9Y2Q3, O00116, O43933, Q15126, O75874, P04179, O15254, Q13608, O60488, Q15067, Q9UJ83, O14734	0.00626387
hsa00270:Cysteine and methionine metabolism	23	P25325, P40925, P40926, P26358, Q96GX9, P19623, P31153, P17174, P00338, Q96GA7, P00505, P07195, P23526, O43865, Q9BV57, Q9BV20, Q96HN2, Q9NZL9, Q16762, P52788, P32929, Q9UHY7, Q13126	0.00407288		hsa01210:2-Oxocarboxylic acid metabolism	13	O15382, O75874, P17174, Q8TD30, Q03154, P48735, P50213, O43837, P00505, Q99798, O75390, P51553, P21399	0.00609177		hsa01210:2-Oxocarboxylic acid metabolism	13	O15382, O75874, P17174, Q8TD30, Q03154, P48735, P50213, O43837, P00505, Q99798, O75390, P51553, P21399	0.00631132
hsa00030:Pentose phosphate pathway	19	P37837, Q01813, P04075, P06744, Q9Y315, P29401, P17858, P09972, P11908, O95479, P36871, O95336, P08237, P60891, Q96G03, P52209, P11413, P49247, Q96AT9	0.00411547		hsa04910:Insulin signaling pathway	61	Q93100, P09467, P49815, P62753, P10398, P06737, O15357, P62136, P27986, P62993, O15530, P54619, P52789, Q15382, Q16822, P36507, P29353, P13807, P15056, O75955, P62140, Q92934, P49841, Q07889, Q05469, Q2TB90, P36873, P23443, P22681, Q15642, Q02750, Q9UPT5, P13861, P62158, P10644, P10586, P46109, P41743, P31751, P28482, P11216, P42345, P46108, Q9Y478, O00757, Q13131, Q14254, P31321, P49327, P27361,…	0.00916087		hsa05169:Epstein-Barr virus infection	56	P48556, O43242, Q13200, Q92769, Q13573, Q99460, O00487, O43318, P27986, O15264, P06400, P46934, Q93009, P04637, Q04206, Q15008, Q15628, P51665, Q16539, P62191, P43686, P35998, Q06330, O00463, P62195, O15111, Q13547, Q13546, Q00653, P51617, P08670, P43405, P31751, P17980, P55036, P46734, P07948, P23458, Q9Y618, Q15653, P19525, Q15750, P19838, P24941, Q12933, P18465, Q14653, Q9UNM6, P42338, P62333,…	0.00637041
hsa00630:Glyoxylate and dicarboxylate metabolism	18	P24752, P40925, P40926, A6NDG6, P15104, P34896, P34897, P04040, P09622, P23434, P05165, P05166, Q9BWD1, P22033, Q9UBQ7, Q99798, O75390, P21399	0.00440375		hsa05169:Epstein-Barr virus infection	55	P48556, O43242, Q13200, Q9UHD2, Q92769, Q13573, Q99460, O00487, O43318, P27986, P10314, P06400, P46934, Q93009, P04637, O95786, Q15008, Q04206, Q15628, P45985, P51665, Q16539, P62191, P43686, P35998, P62195, O15111, Q13547, Q13546, Q00653, P51617, P43405, P31751, P17980, P55036, P46734, Q9Y6K9, P23458, Q9Y618, Q15653, P19525, Q15750, P19838, P24941, Q12933, Q14653, Q9UNM6, P42338, P62333, P05534,…	0.00930472		hsa04520:Adherens junction	36	P19784, P46940, P18206, Q92692, P12931, P60953, P08581, P60709, P67870, Q9UQB8, Q9Y6W5, P35221, P68400, P35222, P12814, P55196, O43318, P29350, P12830, O60716, P28482, P60763, P06241, O43707, P07947, Q07157, Q08043, Q09472, Q8WWI1, P27361, P18031, P63000, Q92558, P61586, P63261, P26232	0.00720757
hsa04110:Cell cycle	57	Q9H1A4, Q13042, Q92769, P31947, P31946, Q13616, P30260, Q00534, Q9UQE7, Q14566, P06400, O14757, P49841, P14635, P62258, O60216, Q8WVM7, Q14683, Q13416, Q9UJX3, Q9UJX4, Q13257, Q9UJX5, Q16254, O43929, P51946, Q9UBD5, P06493, P61981, O60566, P50613, P78527, Q9UJX2, Q13547, P27348, P33981, P63208, P62877, P49736, P12004, P63104, O43684, Q9Y6D9, Q09472, O96017, P24941, Q8N3U4, P25205, P33993, P33992,…	0.00498991		hsa00900:Terpenoid backbone biosynthesis	15	P24752, Q01581, Q9UHG3, P54868, O95749, P49354, Q03426, P49356, P14324, Q96E22, Q15126, Q13907, Q9BWD1, P53602, O75844	0.0101161		hsa05131:Shigellosis	33	Q92747, P18206, P60953, O60610, P12931, P60709, Q9Y6W5, Q01081, O15111, P07737, P46109, P84095, P28482, Q9H1Y0, P59998, P46108, O15264, Q9BPX5, P05556, O15144, Q15653, O15145, O15143, Q13464, P27361, P19838, P63000, Q92558, Q04206, P63261, O75116, Q16539, Q14247	0.0083651
hsa04150:mTOR signaling pathway	31	P23443, P17252, Q15349, P49815, P62753, P23588, Q96B36, P27986, Q9Y376, O15530, P31751, P28482, Q15382, P42345, P15056, Q13131, P51812, Q13541, P27361, O60573, P06730, Q15418, P42338, Q6PHR2, Q8N122, Q9BVC4, Q9H9S4, O00459, P60484, Q7L523, P31749	0.00558589		hsa05211:Renal cell carcinoma	33	Q15369, P60953, P08581, Q02750, P10398, P61812, P11166, P46109, P27986, P62993, Q15370, Q06124, P62877, P31751, P28482, Q13617, P36507, P46108, P15056, P61224, Q09472, Q13153, O96013, P40337, P27361, Q13177, Q07889, P63000, P42338, P07954, P01116, P01111, P31749	0.0139353		hsa03020:RNA polymerase	19	Q9H9Y6, Q9GZS1, P52434, Q9NVU0, P52435, O15514, P62487, P19388, P24928, P19387, P30876, P62875, Q9Y2S0, P36954, O14802, Q9NW08, O95602, O15160, Q9BUI4	0.0173397
hsa04146:Peroxisome	41	P51659, P39210, O95573, P56589, P48735, P04040, Q9BTZ2, P33121, Q9BY49, A8MXV4, P34913, Q9ULC5, P30044, P22307, Q9BQG2, O43808, Q08426, P35914, O75521, O96011, Q8WVX9, P40855, Q03426, Q13011, Q9Y5Y5, P28288, O15228, O14975, P09110, Q9NR77, Q9Y2Q3, O00116, Q15126, O75874, P04179, O15254, Q13608, O60488, Q15067, Q9UJ83, O14734	0.00563954		hsa05120:Epithelial cell signaling in Helicobacter pylori infection	33	Q16864, P60953, P12931, P08581, P41240, O15111, Q93050, Q9Y5K8, P38606, Q06124, Q9Y2X7, Q15904, P36543, Q9Y6K9, Q07157, O75348, Q13153, P19174, Q9UI12, O14672, P19838, P21283, P15313, P21281, P63000, P61421, Q04206, P45985, P42574, Q16539, P00533, Q9Y487, Q9Y624	0.0184087		hsa04114:Oocyte meiosis	50	Q14573, Q9H1A4, Q14571, Q13042, P30154, P30153, Q08209, P31946, P62136, Q14674, Q13616, P30260, Q9UQE7, P22694, P63098, P62140, Q9H2G2, Q15418, P14635, P62258, Q14683, P67775, Q13555, Q16537, Q13557, Q9UJX3, Q9UJX4, Q13257, Q9UJX5, P36873, Q15349, Q02750, P06493, Q14643, P61981, Q9UJX2, P62158, P27348, Q13362, P63208, P62877, P28482, Q14738, P63104, Q15172, P51812, P48454, P27361, P24941, Q04917	0.0175576
hsa05132:Salmonella infection	41	Q92747, Q9Y6G9, Q99836, P60953, Q9H0B6, P60709, P53778, Q9Y6W5, P07737, Q13409, P84095, P28482, P59998, Q14116, Q07157, O00401, Q07866, O15144, O15145, O15143, Q13464, P21333, P27361, O43237, P19838, Q8NCM8, P51149, O75369, P63000, Q14315, Q92558, Q14204, Q6P597, Q04206, P63261, O75116, Q16512, P35080, Q16513, Q16539, P45983	0.00563954		hsa05110:Vibrio cholerae infection	27	Q16864, P17252, P60709, Q9UDY2, Q93050, P13667, Q9Y5K8, P38606, P55011, Q15904, P84077, P36543, Q07157, Q5JWF2, O75348, P60059, P19174, Q9UI12, P21283, P61619, P15313, P21281, P61421, Q96HE7, Q9H9S3, P63261, Q9Y487	0.0195171		hsa00052:Galactose metabolism	18	Q16851, P16278, Q01813, P15291, Q96C23, P19367, Q2TB90, P17858, P36871, P07902, P10253, P08237, P52789, Q96G03, Q14376, P15121, P06280, P51570	0.0198641
hsa04910:Insulin signaling pathway	62	P49815, P62753, P10398, P06737, O15357, P62136, P27986, P62993, O15530, P54619, P52789, Q15382, Q16822, P17612, P36507, P22694, P29353, P13807, P15056, P62140, Q92934, P49841, Q07889, O00459, P45983, P36873, P23443, P22681, Q15642, Q02750, Q9UPT5, P13861, P62158, P10644, Q13905, P10586, P46109, P41743, P31751, P28482, P11216, P42345, P46108, Q9Y478, Q13131, P31323, P31321, P49327, Q13541, P27361,…	0.00573559		hsa00920:Sulfur metabolism	8	P25325, Q9Y6N5, O95861, Q16762, O95340, Q9NX62, O95571, O43252	0.0296477		hsa04910:Insulin signaling pathway	59	Q93100, P49815, P62753, P10398, P06737, O15357, P62136, P27986, P62993, O15530, P54619, P52789, Q15382, Q16822, P36507, P22694, P29353, P15056, O75955, P62140, Q92934, P49841, Q07889, Q2TB90, P36873, P23443, P22681, Q02750, Q9UPT5, P13861, P62158, P10644, Q13905, P46109, P41743, P31751, P28482, P11216, P42345, P46108, Q9Y478, Q13131, Q14254, P31321, P35558, P49327, Q13541, P27361, O60573, P19367,…	0.0277206
hsa01210:2-Oxocarboxylic acid metabolism	13	O15382, O75874, P17174, Q8TD30, Q03154, P48735, P50213, O43837, P00505, Q99798, O75390, P51553, P21399	0.0057642		hsa05223:Non-small cell lung cancer	28	Q13043, P17252, Q02750, Q9HC35, P10398, P27986, O15530, P62993, P28702, P04626, P31751, P28482, Q00534, P36507, P55211, P15056, P06400, P19793, Q92934, P19174, P27361, Q07889, P04637, P42338, P01116, P00533, P01111, P31749	0.029909		hsa00480:Glutathione metabolism	26	P19623, P78417, P10620, P48735, P31350, O75223, P48507, P30711, P52788, P18283, P0CG30, P48506, P00390, P07203, Q9Y2Q3, O14880, P23921, P48637, P09211, O75874, O95881, P11413, P52209, Q7LG56, P28838, P36969	0.0334611
hsa05203:Viral carcinogenesis	86	Q16531, P12931, Q92769, Q13573, Q96EY1, O00571, P31946, P27986, P10316, P62993, Q08AM6, Q00534, O43707, P17612, P13747, P61978, P10314, P22694, P16188, P06400, Q8WUI4, O14757, Q14790, Q92934, Q5T4S7, Q93009, P63000, P16220, P32780, P62258, Q9BY41, P61586, Q15628, Q04206, O00459, P62191, Q9Y277, Q12959, Q00403, P60953, Q9UBN7, Q14160, O15379, P29084, P29083, Q06330, P06493, P43487, P61981, P12814,…	0.00712201		hsa00480:Glutathione metabolism	26	P19623, P78417, P10620, P48735, P31350, O75223, P48507, P30711, P52788, P18283, P48506, P00390, P07203, Q9Y2Q3, O14880, P23921, P48637, P09211, O75874, O95881, P11413, P52209, Q7LG56, Q99735, P28838, P36969	0.030289		hsa04071:Sphingolipid signaling pathway	52	Q66LE6, P63151, Q03113, Q6ZMG9, Q9BX95, P17252, P30154, P30153, Q02750, Q01970, P04899, Q13362, P27986, O15530, P31751, P28482, O95470, Q14738, P06241, P60763, P63096, P36507, O15264, P08754, Q15172, O15269, Q13464, P50148, P27361, P19838, Q12933, P63000, P04637, P04049, Q14344, Q13510, Q96G23, Q07812, P42338, P33527, P67775, P61586, Q15628, O75116, Q04206, O15270, P01116, Q16539, P60484, Q16537,…	0.0334874
hsa05134:Legionellosis	29	P62820, Q99836, P34931, Q9BXK5, O14727, P11142, Q00653, Q00613, Q14116, Q9Y6B6, P55210, P84077, P55072, P17066, P55211, Q05639, P68104, Q9NR31, Q14790, P54652, P19838, Q9H0U4, P26641, O75396, P10809, P0DMV8, Q04206, P42574, Q9Y450	0.0073284		hsa05134:Legionellosis	27	P68104, Q05639, P62820, Q9NR31, P34931, Q14790, P54652, Q9ULZ3, P19838, Q9H0U4, O14727, P26641, O75396, P11142, Q00653, P10809, P0DMV8, Q04206, Q00613, P42574, Q9Y450, Q9Y6B6, P55210, P55072, P84077, P17066, P55211	0.03415		hsa04919:Thyroid hormone signaling pathway	50	P42224, P12931, Q92769, P60709, P49815, Q01970, Q9Y6Q9, Q9UHV7, P11166, P27986, O15530, Q15382, P05023, P36507, P22694, P55211, P05026, Q92934, Q96ST3, P49841, O60244, P04637, Q9NVC6, P17252, O75376, O15379, Q02750, P35222, Q93074, Q13547, P50993, P28702, P31751, P28482, P42345, Q9NPJ6, Q09472, Q8N3E9, P54709, P19174, P27361, O60825, O75448, P04049, P42338, P63261, P01116, P31749, P01111, Q15648	0.0353759
hsa05213:Endometrial cancer	28	Q02750, P35221, P10398, P35222, P27986, P12830, O15530, P62993, P31751, P28482, P36507, P55211, Q9NQB0, P15056, P49841, Q92934, P27361, Q07889, P04049, P42338, Q13418, P01116, O00459, P60484, P00533, P01111, P31749, P26232	0.00848461		hsa05132:Salmonella infection	38	Q92747, Q9Y6G9, P60953, Q9H0B6, P60709, Q9ULZ3, Q9Y6W5, P07737, Q13409, P84095, P28482, P59998, Q07157, O00401, Q07866, Q9BPX5, O15144, O15145, O15143, Q13464, P21333, P27361, O43237, Q9NSK0, P19838, Q8NCM8, P51149, O75369, P63000, Q92558, Q14204, Q04206, P63261, O75116, Q16512, P35080, Q16513, Q16539	0.0342405		hsa05220:Chronic myeloid leukemia	34	Q92769, P22681, Q02750, P10398, O15111, Q13547, P56545, P27986, P46109, P11274, Q13363, P62993, P51692, Q06124, P31751, P28482, Q00534, P36507, P46108, P29353, P15056, P06400, Q92934, Q01196, P27361, P19838, Q07889, P04637, P04049, P42338, Q04206, P01116, P01111, P31749	0.0355292
hsa05120:Epithelial cell signaling in Helicobacter pylori infection	34	P60953, P12931, P08581, P41240, P53778, O15111, Q93050, P38606, P16885, Q06124, Q9Y2X7, Q15904, P36543, Q9Y6K9, P07948, Q07157, O75348, Q13153, P19174, Q9UI12, O14672, P19838, P21283, P21281, P63000, P61421, Q04206, P45985, P42574, Q16539, P00533, Q9Y487, Q9Y624, P45983	0.00859549		hsa00510:N-Glycan biosynthesis	25	Q9H6U8, P15291, P39656, Q9P2X0, Q09328, Q9UQ53, P26572, Q9Y673, Q16706, P04843, Q2TAA5, P04844, Q8TCJ2, Q9BT22, Q9UPQ8, Q9H553, Q9NP73, P46977, P61803, O60762, Q9UKM7, Q14697, Q86YN1, Q13724, Q9BV10	0.034658		hsa05213:Endometrial cancer	26	Q02750, P35221, P10398, P35222, P27986, P12830, O15530, P62993, P31751, P28482, P36507, P55211, P15056, P49841, Q92934, P27361, Q07889, P04637, P04049, P42338, Q13418, P01116, P60484, P01111, P31749, P26232	0.0422573
hsa05223:Non-small cell lung cancer	29	P17252, Q02750, Q9HC35, P10398, P49789, P27986, O15530, P62993, P16885, P28702, P31751, P28482, Q00534, P36507, P55211, P15056, P06400, P19793, Q92934, P19174, P27361, Q07889, P04049, P42338, O00459, P01116, P00533, P01111, P31749	0.0139862		hsa04110:Cell cycle	53	Q9H1A4, Q13042, Q92769, P31947, P31946, Q13616, P30260, Q00534, Q9UQE7, Q14566, P06400, O14757, P49841, P04637, O60216, P62258, Q8WVM7, Q14683, Q9UJX3, Q9UJX4, Q13257, Q9UJX5, O43929, P51946, Q9UBD5, P06493, P61812, P61981, P50613, P78527, Q13547, P27348, P33981, P63208, P62877, P49736, P12004, P63104, O43684, Q09472, Q9Y6D9, O96017, P24941, Q8N3U4, P25205, P33993, P33992, Q15796, P33991, Q13535,…	0.0349175		hsa05110:Vibrio cholerae infection	26	Q16864, P17252, P60709, Q9UDY2, Q93050, P13667, Q9Y5K8, P38606, P55011, Q15904, P84077, P22694, P36543, Q07157, Q5JWF2, O75348, P60059, P19174, Q9UI12, P21283, P61619, P21281, P61421, Q96HE7, P63261, Q9Y487	0.0422573
hsa03020:RNA polymerase	19	Q9H9Y6, Q9GZS1, P52434, Q9NVU0, P52435, O15514, P62487, P19388, P24928, P19387, P30876, P62875, Q9Y2S0, P36954, O14802, Q9NW08, O95602, O15160, Q9BUI4	0.0153542		hsa00650:Butanoate metabolism	16	P24752, Q01581, Q86V21, P51649, P54868, Q9H9P8, P16219, Q02338, P30084, Q9BWD1, P40939, P55809, Q53FZ2, Q16836, Q08426, P35914	0.035278		hsa00310:Lysine degradation	26	Q02809, P24752, P51648, Q02218, Q03164, Q8IYK4, Q9ULD0, P30837, O15047, O60568, P05091, Q15047, O14686, P49189, Q8NEZ4, Q9BWD1, P30084, P40939, Q92947, Q9BZ95, Q16836, P36957, Q8NBJ5, Q08426, P49419, Q9BYW2	0.0422573
hsa03430:Mismatch repair	15	P27694, P52701, P35244, P49005, P35249, P15927, Q04837, P35250, P35251, P28340, P18858, P40938, P40937, P43246, P12004	0.0163592		hsa03020:RNA polymerase	18	Q9H9Y6, Q9GZS1, P52434, Q9NVU0, P52435, P62487, P19388, P19387, P24928, P30876, P62875, Q9Y2S0, P36954, O14802, Q9NW08, O95602, O15160, Q9BUI4	0.0365407		hsa03022:Basal transcription factors	23	Q15542, Q92759, Q00403, P49848, P13984, P35269, P51946, P21675, P29084, P29083, P62380, Q92804, P50613, P32780, O00268, P18074, P51948, P78347, Q6P1X5, P52657, Q13889, Q7Z7C8, P52655	0.0505684
hsa05220:Chronic myeloid leukemia	35	Q92769, P22681, Q02750, P10398, O15111, Q13547, P56545, P46109, P27986, P11274, Q13363, P62993, Q06124, P31751, P28482, Q00534, P36507, P46108, Q9Y6K9, P29353, P15056, P06400, Q92934, P27361, P19838, Q07889, P04049, Q9ULV8, P42338, Q13485, Q04206, P01116, O00459, P01111, P31749	0.0166218		hsa05212:Pancreatic cancer	31	P42224, P60953, Q02750, P10398, P61812, O15111, P11233, P27986, P15153, P04626, P31751, P28482, P60763, Q00534, Q9Y6K9, P55211, P15056, P06400, P23458, Q92934, P27361, P19838, P63000, P04637, Q15796, P42338, Q04206, P01116, P00533, P31749, P40763	0.0367258		hsa04150:mTOR signaling pathway	28	P23443, P17252, Q15349, P49815, P62753, Q6R327, P23588, P27986, Q9Y376, O15530, P31751, Q15382, P28482, P42345, P15056, Q13131, P51812, Q13541, P27361, O60573, P06730, Q15418, P42338, Q8N122, Q9BVC4, Q9H9S4, P60484, P31749	0.0515909
hsa05212:Pancreatic cancer	32	P42224, P60953, Q02750, P10398, O15111, P11233, P27986, P15153, P31751, P28482, P60763, Q00534, Q9Y6K9, P55211, P15056, P06400, P23458, Q92934, P27361, P19838, P63000, P04049, Q15796, P42338, Q13485, Q04206, O00459, P01116, P00533, P31749, P40763, P45983	0.0200928		hsa05213:Endometrial cancer	26	Q02750, P35221, P10398, P35222, P27986, P12830, O15530, P62993, P04626, P31751, P28482, P36507, P55211, P15056, P49841, Q92934, P27361, Q07889, P04637, P42338, Q13418, P01116, P00533, P01111, P31749, P26232	0.0371663		hsa04370:VEGF signaling pathway	29	P60953, P12931, P17252, Q08209, Q02750, P27986, Q16644, P31751, P28482, P60763, P36507, P55211, O15264, P63098, P49137, Q92934, P48454, P19174, P27361, P63000, P04049, Q05397, P42338, P49023, Q16539, P01116, P04792, P01111, P31749	0.0560773
hsa04666:Fc gamma R-mediated phagocytosis	39	Q92747, P60953, P23443, P17252, Q9Y6W5, Q02750, P23528, O15357, P27986, P46109, P15153, P16885, P31751, P28482, P29966, P59998, P46108, P07948, O00401, O15144, Q13153, Q9Y281, O15145, O15143, P52735, P19174, P27361, O43150, Q05655, O00499, O14939, P63000, P04049, Q92558, P50552, P42338, P62330, O00459, P31749	0.0240073		hsa00052:Galactose metabolism	17	Q16851, P16278, Q01813, P15291, Q96C23, O60218, P19367, Q2TB90, P17858, P36871, P07902, P08237, P52789, Q96G03, Q14376, P06280, P51570	0.0420429		hsa05221:Acute myeloid leukemia	27	P23443, Q02750, P10398, O15111, P27986, P62993, P51692, P31751, P28482, P42345, P36507, P15056, Q92934, Q01196, Q13541, P14923, P27361, P19838, Q07889, P04049, P42338, Q04206, P01116, P01111, P31749, P40763, P29590	0.0587138
hsa04114:Oocyte meiosis	49	Q9UJX3, Q9UJX4, Q9UJX5, Q14573, Q13257, Q13042, P36873, Q9H1A4, Q15349, P30154, P30153, Q08209, Q02750, P06493, P31946, P61981, P16298, P62136, P62158, Q9UJX2, Q13362, P27348, P63208, P62877, Q13616, P28482, Q14738, P30260, P17612, Q9UQE7, P22694, P63098, P63104, Q15172, P62140, P51812, P48454, Q9H2G2, P27361, P24941, P14635, Q15418, P62258, P67775, Q14683, Q13555, Q04917, Q16537, Q13557	0.02473		hsa04071:Sphingolipid signaling pathway	51	P63151, Q03113, Q6ZMG9, Q9BX95, P17252, P30154, P30153, Q02750, Q01970, P04899, Q13362, P27986, O15530, P15153, P31751, P28482, O95470, Q14738, P60763, P63096, P36507, P08754, Q15172, O15269, Q8N5B7, Q13464, P50148, P27361, P19838, Q12933, P63000, P04637, Q14344, Q13510, Q13393, Q96G23, Q07812, P42338, P33527, P67775, P61586, Q15628, O75116, Q04206, O15270, P01116, Q16539, Q16537, P31749, P01111,…	0.0426847		hsa05120:Epithelial cell signaling in Helicobacter pylori infection	31	Q16864, P60953, P12931, P08581, P41240, O15111, Q93050, Q9Y5K8, P38606, Q06124, Q9Y2X7, Q15904, P36543, O15264, P07948, Q07157, O75348, Q13153, P19174, Q9UI12, O14672, P19838, P21283, P21281, P63000, P61421, Q04206, P42574, Q16539, Q9Y487, Q9Y624	0.0645856
hsa05221:Acute myeloid leukemia	28	P23443, Q02750, P10398, O15111, P27986, P62993, P31751, P28482, P42345, P36507, Q9Y6K9, Q9NQB0, P15056, Q92934, Q13541, P27361, P14923, P19838, Q07889, P04049, P42338, Q04206, O00459, P01116, P01111, P31749, P40763, P29590	0.0276192		hsa04150:mTOR signaling pathway	28	P23443, P17252, Q15349, P49815, P62753, Q6R327, P23588, Q96B36, P27986, Q9Y376, O15530, P31751, Q15382, P28482, P42345, P15056, Q13131, P51812, P27361, O60573, P06730, Q15418, P42338, Q6PHR2, Q8N122, Q9BVC4, Q7L523, P31749	0.0433674		hsa05134:Legionellosis	26	P68104, Q05639, P62820, Q9NR31, Q99836, P34931, P54652, P19838, Q9H0U4, Q9BXK5, O14727, P26641, P11142, O75396, Q00653, P10809, P0DMV8, Q04206, Q00613, P42574, Q9Y450, Q9Y6B6, P55210, P55072, P84077, P55211	0.0668837
hsa04662:B cell receptor signaling pathway	33	Q08209, Q02750, Q9UDY8, O15357, O15111, P16298, P27986, P29350, P62993, P15153, P16885, P31751, P28482, P60763, P36507, Q9Y6K9, P63098, P07948, P60033, P49841, P48454, P52735, P27361, P19838, Q07889, P63000, P04049, P42338, Q04206, O00459, P01116, P01111, P31749	0.0278076		hsa04919:Thyroid hormone signaling pathway	49	P42224, P12931, Q92769, O75376, P17252, O15379, P49815, P60709, Q02750, Q01970, P35222, Q93074, P11166, Q9UHV7, Q13547, P27986, O15530, P50993, P06756, P28702, P31751, Q15382, P28482, P42345, P36507, P05023, P55211, P05026, Q9NPJ6, P19793, O60343, Q09472, Q8N3E9, P49841, Q96ST3, Q92934, P19174, P27361, O60825, O75448, O60244, P04637, Q9NVC6, P42338, P63261, P01116, Q15648, P01111, P31749	0.0450326		hsa00510:N-Glycan biosynthesis	24	Q8TCJ2, Q9H6U8, Q9BT22, P15291, Q9UPQ8, P39656, Q9H553, Q9P2X0, Q09328, Q9NP73, Q9UQ53, P46977, P26572, P61803, O60762, Q9UKM7, Q16706, Q14697, Q86YN1, Q13724, Q2TAA5, P04843, Q9BV10, P04844	0.0697849
hsa05110:Vibrio cholerae infection	26	P17252, P60709, Q9UDY2, Q93050, P13667, P38606, P16885, P55011, Q15904, P17612, P84077, P22694, P36543, Q07157, Q5JWF2, O75348, P60059, P19174, Q9UI12, P21283, P61619, P21281, P61421, Q96HE7, P63261, Q9Y487	0.0367649		hsa04370:VEGF signaling pathway	29	P60953, P12931, P17252, Q08209, Q02750, P16298, P27986, Q16644, P15153, P31751, P28482, P60763, P36507, P55211, P63098, P49137, Q92934, P19174, P27361, P47712, P63000, Q05397, P42338, P49023, Q16539, P01116, P04792, P01111, P31749	0.0465015		hsa04722:Neurotrophin signaling pathway	50	P60953, Q9NWZ3, Q15349, P52565, P08138, Q02750, P49810, P62158, Q13905, P27986, P46109, Q9Y5V3, P62993, O15530, P51617, P31751, Q06124, P28482, P36507, P46108, P29353, O15264, P61224, P15056, P49137, P49841, Q15653, P51812, Q92934, P19174, P27361, Q05655, P19838, Q07889, P63000, P04637, P04049, Q15418, Q07812, P42338, P62258, P61586, Q04206, Q13555, P01116, Q16539, O14733, P31749, P01111, Q13557	0.0748346
hsa00051:Fructose and mannose metabolism	18	P60174, Q9Y5P6, Q01813, P04075, Q00796, P34949, Q13630, Q8N0W3, O60825, P19367, P17858, Q96IJ6, P09972, P08237, P52789, P15121, O15305, Q9NQ88	0.0373193		hsa04142:Lysosome	51	P16278, Q99519, O00203, Q9BXS5, O14617, Q9Y6Q5, P07686, P17900, Q96PC3, O43747, P10619, Q9UJY4, Q9UJY5, P11717, P11279, Q9Y2T2, P20645, Q13510, O00115, P08236, P09668, Q10567, O15118, Q9Y487, P53634, P09497, Q92572, P61966, P09496, P13473, P15586, Q99538, O00462, Q93050, P11117, P50897, Q9BZC7, Q9UBR2, Q15904, Q00610, O75843, P06280, P06865, O14773, P07858, P04062, Q9UI12, P17050, P61421, Q14108,…	0.0473738		hsa04012:ErbB signaling pathway	38	O43639, P12931, P23443, P22681, P17252, Q02750, P10398, P46109, P27986, P62993, P42684, P51692, P31751, P28482, P42345, P36507, P46108, P29353, P15056, Q13153, P49841, Q92934, O96013, P19174, Q13541, P27361, Q13177, Q07889, P04049, Q05397, P42338, Q13555, P01116, P16333, O14733, P01111, Q13557, P31749	0.0766193
hsa04071:Sphingolipid signaling pathway	51	P63151, Q6ZMG9, Q9BX95, P17252, P30154, P30153, P53778, Q02750, Q01970, P04899, Q13362, P27986, O15530, P15153, P31751, O95470, P28482, Q14738, P60763, P63096, P36507, P08754, Q15172, O15269, Q13464, P50148, P27361, P19838, Q12933, O14939, P63000, P04049, Q14344, Q13510, Q96G23, P42338, P33527, P67775, P61586, Q15628, O75116, Q04206, O15270, P01116, O00459, Q16539, P60484, Q16537, P31749, P01111,…	0.044414		hsa03410:Base excision repair	18	P27695, Q07864, P78549, P49005, P49916, P09874, P39748, P56282, Q53HV7, Q9NRF9, P28340, Q15054, P29372, Q9UKK3, P18858, P18887, P09429, P12004	0.0482007		hsa00900:Terpenoid backbone biosynthesis	13	P14324, Q01581, P24752, Q96E22, Q15126, Q9UHG3, Q13907, O95749, Q9BWD1, Q03426, P49354, P49356, O75844	0.0834801
hsa00250:Alanine, aspartate and glutamate metabolism	19	Q06210, P00367, P51649, Q06203, P00966, O94925, Q9NQR4, P15104, P17174, P30520, P31327, O94808, P00505, P04424, P30566, P08243, P27708, Q8TD30, P30038	0.044594		hsa05220:Chronic myeloid leukemia	33	Q92769, P22681, Q02750, P10398, P61812, O15111, Q13547, P56545, P27986, P46109, Q13363, P62993, Q06124, P31751, P28482, Q00534, P36507, P46108, Q9Y6K9, P29353, P15056, P06400, Q92934, P27361, P19838, Q07889, P04637, Q9ULV8, P42338, Q04206, P01116, P01111, P31749	0.0487717		hsa04142:Lysosome	50	P16278, Q99519, O00203, Q9BXS5, O14617, Q9Y6Q5, P07686, P10253, Q96PC3, O43747, P10619, Q9UJY4, Q9UJY5, P11717, P11279, Q9Y2T2, P20645, Q13510, O00115, P56377, P08236, Q10567, O15118, Q9Y487, P53634, P09497, Q92572, P61966, P09496, Q8NCC3, P13473, P15586, Q99538, Q93050, P11117, P50897, Q9UBR2, Q15904, Q00610, O75843, P06280, P06865, O14773, P07858, P04062, Q9UI12, P17050, P61421, Q14108, P07602	0.0841756
hsa04720:Long-term potentiation	31	Q14573, P36873, P17252, Q15349, Q08209, Q01970, Q02750, P10398, P16298, P62136, P62158, P28482, P17612, P36507, P22694, P63098, P61224, P62834, P15056, Q09472, P62140, P51812, P48454, P50148, P27361, Q15418, P04049, Q13555, P01116, P01111, Q13557	0.0458874		hsa04666:Fc gamma R-mediated phagocytosis	37	Q92747, P60953, P23443, P17252, Q9Y6W5, Q02750, P23528, O15357, P27986, P46109, P15153, P43405, P31751, P28482, P29966, P59998, P46108, O00401, Q9BPX5, O15144, Q13153, O15145, O15143, P52735, P19174, P27361, O43150, Q05655, O00499, P63000, Q13393, Q92835, Q92558, P50552, P42338, P62330, P31749	0.0619449		hsa04720:Long-term potentiation	30	Q14573, Q14571, P36873, P17252, Q15349, Q08209, Q01970, Q02750, P10398, Q14643, P62136, P62158, P28482, P36507, P22694, P63098, P61224, P15056, Q09472, P62140, P51812, P48454, P50148, P27361, Q15418, P04049, Q13555, P01116, Q13557, P01111	0.0852062
hsa04066:HIF-1 signaling pathway	42	Q15369, P04406, P01033, P23443, P17252, P06733, P62753, Q02750, P11166, P27986, P13929, P16885, P52789, Q15370, P31751, P62877, P28482, Q13617, P09104, P42345, P08559, P36507, Q09472, P02786, P40337, P19174, Q13541, P27361, O60573, P19838, P19367, P06730, P11177, Q9GZT9, P42338, Q04206, Q13555, O00459, P00533, P40763, Q13557, P31749	0.0495927		hsa00450:Selenocompound metabolism	11	Q16773, P56192, Q96GW9, Q9NNW7, P49903, Q16881, O95340, P32929, Q96I15, O43252, Q6YP21	0.0639319		hsa04662:B cell receptor signaling pathway	31	Q08209, Q02750, Q9UDY8, O15357, O15111, P27986, P29350, P62993, P43405, P31751, P28482, P60763, P36507, P63098, P07948, Q15653, P60033, P49841, P48454, P52735, P27361, P19838, Q07889, P63000, P04049, Q92835, P42338, Q04206, P01116, P01111, P31749	0.0896467
hsa05205:Proteoglycans in cancer	79	P46940, Q14573, P12931, P62070, P60709, P62753, P53778, P10398, Q03135, P62136, P18084, P27986, P15311, P29350, P62993, O15530, Q9BRJ7, P16885, P17612, P36507, P22694, P15056, Q13153, P05556, P62140, P26038, Q13464, P21333, P17844, Q07889, O75369, P63000, Q12955, P61586, Q13555, O00459, Q16539, Q13557, Q92888, P60953, P36873, P23443, P22681, P08581, P17252, Q02750, P35222, Q9NZN5, P23588, P06756,…	0.0498291		hsa04012:ErbB signaling pathway	38	P12931, P23443, P22681, P17252, Q02750, P10398, P46109, P27986, P62993, P42684, P04626, P31751, P28482, P42345, P36507, P46108, P29353, P15056, Q13153, P49841, Q92934, O96013, P19174, P27361, Q13177, Q07889, Q9ULV8, Q05397, P42338, Q13555, P45985, P01116, P16333, P00533, O14733, P01111, Q13557, P31749	0.0643903		hsa05132:Salmonella infection	36	Q92747, Q9Y6G9, Q99836, P60953, Q9H0B6, P60709, Q9Y6W5, P07737, Q13409, P84095, P28482, P59998, O15264, Q07157, Q07866, Q9BPX5, O15144, O15145, O15143, Q13464, P21333, P27361, O43237, Q9NSK0, P19838, P51149, O75369, P63000, Q92558, Q14204, Q04206, P63261, O75116, Q16512, Q16513, Q16539	0.0948557
hsa04510:Focal adhesion	81	P17655, O60610, P12931, P60709, Q03135, P62136, P26006, P18084, P27986, P62993, O15530, P15153, O43707, P29353, P15056, Q13153, P05556, P62140, Q9Y490, P49841, Q92934, Q13464, P52735, P21333, Q07889, O75369, O14950, P63000, O15230, Q13418, P61586, P98170, O00459, P60484, P45983, P18206, P60953, P36873, P08581, P17252, Q02750, Q9NQU5, Q9Y4G6, P35222, P12814, Q13017, P19105, Q13905, P56945, P46109,…	0.0508939		hsa05216:Thyroid cancer	16	P19793, P27361, Q02750, P35222, P04637, P12270, Q92734, P12830, P06753, P28702, P28482, P01116, P36507, P01111, Q16204, P15056	0.064676		hsa05223:Non-small cell lung cancer	26	P06400, Q13043, Q92934, P17252, P19174, P27361, Q02750, P10398, Q9HC35, Q07889, P04637, P04049, P27986, P62993, O15530, P42338, P28702, P31751, P28482, Q00534, P01116, P36507, P55211, P31749, P01111, P15056	0.0951204
hsa05216:Thyroid cancer	16	P19793, P27361, Q02750, P35222, P12270, Q92734, P12830, P06753, P28702, P28482, P01116, P36507, Q16204, P01111, P15056, Q9NQB0	0.066692		hsa00330:Arginine and proline metabolism	24	O15460, Q9BSE5, Q53H96, P51648, P12277, P19623, Q96C36, P17174, P00505, P54886, P04181, P30837, P05091, P12532, P49189, P27338, Q96KP4, P13674, P52788, P21397, P32322, P30038, P28838, P49419	0.0731537		hsa00250:Alanine, aspartate and glutamate metabolism	18	Q06210, P00367, P51649, Q06203, P00966, O94925, Q9NQR4, P15104, P17174, P30520, O94808, P00505, P04424, P30566, P08243, P27708, Q8TD30, P30038	0.0952669
hsa04722:Neurotrophin signaling pathway	50	P08138, P53778, P49810, P27986, O15530, P62993, P16885, P36507, P29353, P15056, Q92934, P49841, Q07889, P63000, Q15418, P62258, P61586, Q13555, Q04206, Q16539, O00459, Q13557, P45983, P60953, P52565, Q15349, Q02750, P62158, Q13905, P46109, Q9Y5V3, P51617, Q06124, P31751, P28482, P46108, P61224, P62834, P51812, P19174, P27361, P19838, Q05655, P04049, P42338, O75582, P01116, O14733, P01111, P31749	0.0667589		hsa04145:Phagosome	60	Q16864, P04350, P07437, Q3ZCM7, P60709, P68371, P18084, P68366, P38606, Q9BQE3, Q15075, P10314, P36543, Q9P2W9, P31146, P05556, P60059, P02786, O43237, P11279, P21283, P15313, P21281, P61619, P63000, P20645, P13498, Q8NEB9, Q86Y82, Q9Y487, Q9H4B7, Q9Y6G9, O15400, P13473, P27797, Q03519, Q03518, P61020, O14964, Q8WTV0, Q93050, Q9Y5K8, Q13409, P17301, P06756, Q15904, Q13509, P27824, O75348, Q9UI12,…	0.0747917		hsa03410:Base excision repair	17	P27695, Q07864, P78549, Q9UGN5, P49005, P49916, P09874, P39748, P56282, Q9NRF9, P28340, Q15054, P29372, P18858, P18887, P09429, P12004	0.108562
hsa00450:Selenocompound metabolism	11	Q16773, P56192, Q96GW9, Q9NNW7, P49903, Q16881, O95340, P32929, Q96I15, O43252, Q6YP21	0.0669457		hsa04662:B cell receptor signaling pathway	31	Q08209, Q02750, O15357, Q9UDY8, O15111, P16298, P27986, P29350, P62993, P15153, P43405, P31751, P28482, P60763, P36507, Q9Y6K9, P63098, Q15653, P60033, P49841, P52735, P27361, P19838, Q07889, P63000, Q92835, P42338, Q04206, P01116, P01111, P31749	0.0748755		hsa04666:Fc gamma R-mediated phagocytosis	36	Q92747, P60953, P23443, P17252, Q9Y6W5, Q02750, P23528, O15357, P46109, P27986, P43405, P31751, P28482, P29966, P59998, P46108, P07948, Q9BPX5, O15144, Q13153, O15145, O15143, P52735, P19174, P27361, O43150, Q05655, O00499, P63000, P04049, Q92558, Q92835, P50552, P42338, P62330, P31749	0.109513
hsa00330:Arginine and proline metabolism	24	O15460, Q53H96, P51648, P12277, P19623, Q96C36, P17174, P00505, P54886, P04181, P30837, P05091, P12532, P49189, P27338, Q96KP4, Q14353, P13674, P52788, P21397, P32322, P30038, P28838, P49419	0.0773802		hsa05203:Viral carcinogenesis	79	Q16531, P12931, Q92769, Q13573, Q96EY1, O00571, P31946, P27986, P62993, Q08AM6, Q00534, O43707, P61978, P10314, P06400, P49137, Q8WUI4, O14757, Q14790, Q92934, Q5T4S7, Q93009, P63000, P04637, P32780, Q07812, P62258, Q9BY41, P61586, Q15628, Q04206, P62191, Q9Y277, Q12959, Q00403, P60953, Q9UBN7, Q14160, O15379, P29083, P06493, P43487, P61981, P12814, Q13547, Q7KZF4, P27348, Q00653, Q9Y676, Q5QNW6,…	0.0756018		hsa00920:Sulfur metabolism	7	P25325, Q9Y6N5, O95861, Q16762, Q9NX62, O95571, O43252	0.113707
hsa03022:Basal transcription factors	22	Q15542, Q00403, P49848, Q92759, P13984, P35269, P51946, P21675, P29084, P29083, Q92804, P50613, P32780, O00268, P18074, P51948, P78347, Q6P1X5, P52657, Q13889, Q7Z7C8, P52655	0.0813982		hsa04114:Oocyte meiosis	46	Q9UJX3, Q9UJX4, Q14573, Q13257, Q9UJX5, Q13042, P36873, Q14571, Q9H1A4, Q15349, P30154, P30153, Q08209, Q02750, P06493, P31946, P61981, P16298, P62136, P62158, Q13362, P27348, P63208, P62877, P28482, Q13616, Q14738, P30260, Q9UQE7, P63098, P63104, Q15172, P62140, P51812, Q9H2G2, P27361, P24941, P08069, Q15418, P62258, P67775, Q14683, Q13555, Q04917, Q16537, Q13557	0.0805069		hsa04066:HIF-1 signaling pathway	40	Q15369, P04406, P01033, P23443, P17252, P06733, P62753, Q02750, P11166, P27986, P13929, P52789, Q15370, P31751, P62877, P28482, Q13617, P09104, P42345, P08559, P36507, Q09472, P02786, P40337, P19174, Q13541, P27361, O60573, P19838, P19367, Q2TB90, P06730, P11177, Q9GZT9, P42338, Q04206, Q13555, P40763, Q13557, P31749	0.121844
hsa04145:Phagosome	60	P07437, P04350, Q71U36, Q3ZCM7, P60709, P68371, P18084, P10316, P68366, P38606, Q9BQE3, Q15075, P13747, P10314, Q9BUF5, P36543, P16188, Q9P2W9, P31146, P05556, P60059, P02786, O43237, P11279, P21283, P21281, P61619, P63000, P20645, P13498, Q8NEB9, Q86Y82, Q9Y487, Q9H4B7, Q9Y6G9, O15400, P13473, Q15836, P27797, Q03519, Q03518, O14964, Q8WTV0, Q93050, Q13409, P17301, P06756, Q15904, Q13509, P27824,…	0.0814778		hsa00250:Alanine, aspartate and glutamate metabolism	18	Q06210, P00367, P51649, Q06203, P00966, O94925, Q9NQR4, P15104, P17174, P30520, O94808, P00505, P04424, P30566, P08243, P27708, Q8TD30, P30038	0.0817414		hsa04540:Gap junction	37	P07437, P04350, Q14573, Q71U36, P12931, Q14571, Q3ZCM7, P17252, Q01970, Q02750, P06493, Q14643, P68371, P04899, P48730, P62993, P68366, P28482, Q9BQE3, P36507, P63096, P22694, Q9BUF5, P29992, Q07157, P08754, Q5JWF2, Q13509, P50148, P27361, Q07889, P04049, Q9BVA1, Q13885, P01116, P01111, Q9H4B7	0.128511
hsa00052:Galactose metabolism	16	Q16851, P16278, Q01813, P15291, Q96C23, P19367, P17858, P36871, P07902, P10253, P08237, P52789, Q96G03, Q14376, P15121, P51570	0.0898317		hsa00062:Fatty acid elongation	14	Q8N9L9, Q9NZ01, Q9BW60, P42765, Q9P035, Q86TX2, P50897, Q9BV79, P30084, P40939, P55084, Q16836, O00154, Q53GQ0	0.0832304		hsa04810:Regulation of actin cytoskeleton	79	P46940, Q9NYB9, O60610, P12931, P62070, P60709, Q9Y6W5, P10398, P23528, P62136, P07737, P27986, P15311, P62328, Q9Y2X7, P59998, P78356, O43707, P36507, P15056, Q9BPX5, Q13153, P05556, P62140, P26038, Q13464, P52735, Q07889, O14950, P63000, Q14344, P61586, P48426, Q92747, Q92888, Q03113, P18206, P60953, P36873, Q9UQB8, Q02750, Q96F07, Q9NZN5, Q8TBX8, P12814, P19105, P46109, P56945, P17301, Q7L576,…	0.143664
hsa05210:Colorectal cancer	28	P52701, Q02750, P10398, P35222, Q9UKG1, P27986, P15153, P31751, P28482, P60763, P55211, Q9NQB0, P15056, P49841, Q92934, P27361, P63000, P04049, Q15796, P42338, Q13485, P61586, P42574, O00459, P43246, P01116, P31749, P45983	0.100227		hsa04066:HIF-1 signaling pathway	40	Q15369, P04406, P01033, P23443, P17252, P06733, P62753, Q02750, P11166, P27986, P13929, P52789, P04626, Q15370, P31751, P62877, P28482, Q13617, P42345, P08559, P36507, Q09472, P02786, P40337, P19174, P27361, O60573, P19838, P19367, Q2TB90, P06730, P08069, P11177, P42338, Q04206, Q13555, P00533, P40763, Q13557, P31749	0.10559		hsa05216:Thyroid cancer	15	P27361, Q02750, P35222, P04637, P12270, Q92734, P12830, P06753, P28702, P28482, P01116, P36507, P01111, Q16204, P15056	0.145161
hsa03410:Base excision repair	17	P27695, Q07864, P78549, Q9UGN5, P49005, P49916, P09874, P39748, P56282, Q9NRF9, P28340, P29372, Q9UKK3, P18858, P18887, P09429, P12004	0.10138		hsa05205:Proteoglycans in cancer	76	P46940, Q14573, Q14571, P12931, P62070, P60709, P62753, P10398, P62136, P18084, P27986, P15311, P29350, P62993, O15530, Q9BRJ7, P36507, P98160, P15056, Q13153, P05556, P62140, P26038, Q13464, P21333, P17844, Q03405, Q07889, O75369, P63000, P04637, P08069, Q12955, P61586, Q13555, Q16539, Q13557, Q92888, P60953, P36873, P23443, P22681, P08581, P17252, Q02750, P61812, P35222, Q9NZN5, P23588, P06756,…	0.10834		hsa04145:Phagosome	58	Q16864, P07437, P04350, Q71U36, Q3ZCM7, P60709, P68371, P68366, P38606, Q9BQE3, Q15075, Q9BUF5, P36543, Q9P2W9, P31146, P05556, P60059, P02786, O43237, P11279, P21283, P21281, P61619, P63000, P20645, Q8NEB9, Q86Y82, Q9Y487, Q9H4B7, Q9Y6G9, O15400, P13473, P27797, Q03519, Q03518, P61020, O14964, Q8WTV0, Q93050, Q9Y5K8, Q13409, P17301, Q15904, Q13509, P27824, O75348, Q9UI12, P51149, P18465, P51148,…	0.163951
hsa04914:Progesterone-mediated oocyte maturation	37	Q9UJX3, Q9UJX4, Q13257, Q9UJX5, Q9H1A4, Q13042, Q15349, Q02750, P53778, P06493, P10398, P04899, Q9UJX2, P07900, P27986, P31751, P28482, P30260, P17612, P63096, P22694, P15056, P08754, Q9Y6D9, P51812, P27361, P24941, P14635, Q15418, P04049, P08238, P42338, P01116, Q16539, O00459, P31749, P45983	0.103392		hsa05210:Colorectal cancer	27	P52701, Q02750, P10398, P61812, P35222, Q9UKG1, P20585, P27986, P15153, P31751, P28482, P60763, P55211, P15056, Q92934, P49841, P27361, P63000, P04637, Q15796, P42338, Q07812, P61586, P42574, P43246, P01116, P31749	0.154599		hsa04210:Apoptosis	27	P17655, O14763, O00273, O15111, O95831, Q13315, Q13546, O14727, P27986, P31751, Q13158, P55210, P55211, P55212, Q92934, P19838, P07384, Q12933, P04637, P42338, Q07812, Q04206, P98170, Q15628, P42574, Q14249, P31749	0.166125
hsa04142:Lysosome	49	P16278, P15586, P13473, O00203, O14617, Q9BXS5, Q9Y6Q5, P07686, Q99538, Q93050, P11117, P17900, P50897, O00754, Q9BZC7, P10253, Q9UBR2, Q15904, Q00610, Q96PC3, O43747, P10619, P06865, O14773, Q9UJY4, Q9UJY5, P04062, P07858, P11717, Q9UI12, P11279, Q9Y2T2, P20645, Q13510, P17050, O00115, P61421, P08236, O15118, Q10567, P53634, Q9Y487, P51688, P09497, Q92572, P07602, Q14108, P09496, P61966	0.106435		hsa04122:Sulfur relay system	7	P25325, O75648, Q9Y697, Q2VPK5, Q16762, O96007, O95396	0.178884		hsa00650:Butanoate metabolism	14	P24752, Q01581, Q86V21, P51649, Q9H9P8, P16219, Q02338, Q9BWD1, P30084, P40939, P55809, Q16836, Q08426, P35914	0.166277
hsa04664:Fc epsilon RI signaling pathway	30	P17252, Q02750, P53778, P27986, O15530, P62993, P15153, P16885, P31751, P28482, P60763, P36507, P46734, P07948, P52735, P19174, P27361, Q07889, P47712, P63000, P04049, P42338, P45985, O00459, Q16539, P01116, O14733, P01111, P31749, P45983	0.10718		hsa00072:Synthesis and degradation of ketone bodies	7	Q01581, P24752, Q02338, P54868, Q9BWD1, P55809, P35914	0.178884		hsa00450:Selenocompound metabolism	10	Q16773, P56192, Q96GW9, Q9NNW7, P49903, Q16881, P32929, Q96I15, O43252, Q6YP21	0.169142
hsa04962:Vasopressin-regulated water reabsorption	21	Q5JWF2, Q9Y6G9, Q96FJ2, P46459, Q13561, P52565, P63167, O43237, Q8NCM8, P62491, Q9UJW0, P16220, P51148, P20339, Q13409, Q14204, Q14203, Q15907, Q9BTE1, P17612, P22694	0.112845		hsa00410:beta-Alanine metabolism	15	P51648, P19623, Q02252, P30837, P05091, P30838, P11310, Q6NVY1, Q96KP4, P49189, P30084, P52788, P40939, Q08426, P49419	0.220065		hsa04922:Glucagon signaling pathway	40	Q93100, Q14573, Q14571, Q08209, Q01970, Q14643, P06737, P62158, P11166, P54619, P31751, Q16822, P11216, P08559, Q9Y478, P22694, P63098, Q96EB6, Q5JWF2, Q13131, Q09472, P18669, P48454, P00338, P35558, P50148, P60510, P07195, Q99873, P16220, Q13085, P11177, Q5MIZ7, P50416, Q6IN85, Q13555, P14618, P15259, Q13557, P31749	0.17432
hsa04660:T cell receptor signaling pathway	41	O43639, P60953, Q08209, P53778, Q02750, Q9NQU5, Q9UDY8, O15111, P16298, O43318, P27986, P29350, P62993, O15530, P31751, P28482, P36507, Q9Y6K9, P63098, Q13153, P49841, O96013, P48454, P52735, P19174, P27361, P19838, Q13177, Q07889, P04049, P42338, P61586, Q04206, P01116, P16333, Q16539, O00459, O14733, P01111, P31749, Q12959	0.131868		hsa05221:Acute myeloid leukemia	24	Q92934, P23443, Q02750, P14923, P27361, P19838, P10398, Q07889, O15111, P27986, P62993, P42338, P31751, P28482, Q04206, P42345, P01116, P36507, Q9Y6K9, P31749, P40763, P01111, P29590, P15056	0.226047		hsa04122:Sulfur relay system	7	P25325, O75648, Q9Y697, Q2VPK5, Q16762, O96007, O95396	0.181076
hsa04961:Endocrine and other factor-regulated calcium reabsorption	21	Q5JWF2, P17252, P50570, P54709, P50148, Q01970, P62491, P63010, P50993, O94973, P13637, Q00610, O95782, P17612, P05023, P53680, P22694, P09497, Q96CW1, P05026, P09496	0.140015		hsa03450:Non-homologous end-joining	8	P49959, Q92878, P12956, Q13426, P13010, Q9H9Q4, P39748, P78527	0.228294		hsa04730:Long-term depression	26	Q14573, Q03113, Q14571, P17252, P30154, P30153, Q02750, Q01970, P10398, Q14643, P04899, P28482, P36507, P63096, P15056, P07948, P29992, Q5JWF2, P08754, P50148, P27361, P04049, Q14344, P67775, P01116, P01111	0.182991
hsa04670:Leukocyte transendothelial migration	46	P14209, P18206, P60953, P17252, P60709, P53778, P35221, P35222, P04899, P55196, Q13017, P12814, P19105, P56945, P27986, P15311, P15153, P16885, O60716, Q06124, Q9NRY4, O43707, P63096, P61224, P62834, P08754, Q08043, P05556, P26038, Q96FS4, Q13464, P52735, P19174, P63000, O14950, P50552, Q05397, P13498, P42338, P49023, P61586, O75116, P63261, O00459, Q16539, Q9Y624, P26232	0.144087		hsa00061:Fatty acid biosynthesis	8	Q13085, Q9ULC5, Q9NWU1, O95573, P49327, Q8IVS2, P33121, O60488	0.228294		hsa00062:Fatty acid elongation	13	Q9NZ01, Q8N9L9, Q9BW60, P42765, Q9P035, P50897, Q9BV79, P30084, P55084, P40939, Q16836, O00154, Q53GQ0	0.185048
hsa04210:Apoptosis	27	P17655, O14763, O00273, O15111, O95831, O14727, Q13546, P27986, P31751, Q13158, Q9Y6K9, P55210, P55211, Q92934, Q14790, P07384, P19838, Q12933, P42338, P98170, Q15628, Q04206, P25445, P42574, O00459, Q14249, P31749	0.152875		hsa04210:Apoptosis	26	P17655, O00273, O15111, O95831, Q13546, O14727, P27986, P31751, Q13158, Q9Y6K9, P55210, P55211, P55212, Q14790, Q92934, P07384, P19838, Q12933, P04637, P42338, Q07812, Q04206, Q15628, P42574, Q14249, P31749	0.237437		hsa04660:T cell receptor signaling pathway	40	O43639, P06239, P60953, Q08209, Q02750, Q9UDY8, O15111, O43318, P27986, P29350, O15530, P62993, P31751, P28482, P06241, P36507, P63098, O15264, Q13153, Q15653, P49841, O96013, P48454, P52735, P19174, P27361, P19838, Q13177, Q07889, P04049, P42338, P61586, Q04206, P01116, P16333, Q16539, O14733, P01111, P31749, Q12959	0.191672
hsa00480:Glutathione metabolism	23	P19623, P00390, P78417, P10620, P48735, P07203, P31350, Q9Y2Q3, O75223, O14880, P48637, P23921, P48507, O75874, P09211, O95881, P52788, P52209, P11413, Q7LG56, P28838, P0CG30, P48506	0.154076		hsa04722:Neurotrophin signaling pathway	46	P60953, Q15349, P52565, P52566, Q02750, P62158, P46109, P27986, Q9Y5V3, P62993, O15530, P51617, P31751, Q06124, P28482, P36507, P46108, P29353, P61224, P15056, P49137, Q15653, Q92934, P51812, P49841, P19174, P27361, Q05655, P19838, Q07889, P63000, P04637, Q15418, Q07812, P42338, P62258, P61586, Q04206, Q13555, O75582, P01116, Q16539, O14733, Q13557, P31749, P01111	0.241213		hsa04962:Vasopressin-regulated water reabsorption	20	Q5JWF2, Q9Y6G9, Q96FJ2, P46459, Q13561, P52565, P63167, O43237, P62491, Q9UJW0, P61020, P16220, P51148, P20339, Q13409, Q14204, Q14203, Q15907, Q9BTE1, P22694	0.196064
hsa00650:Butanoate metabolism	14	P24752, Q01581, Q86V21, P51649, Q9H9P8, P16219, Q02338, Q9BWD1, P30084, P40939, P55809, Q16836, Q08426, P35914	0.154968		hsa00760:Nicotinate and nicotinamide metabolism	14	Q15274, Q8TCD5, P43490, P00491, P49902, P21589, O95544, Q6XQN6, Q9HAN9, Q9H0P0, Q9BQG2, Q6IA69, P40261, Q13423	0.246621		hsa03450:Non-homologous end-joining	8	P49959, Q92878, P12956, Q13426, P13010, Q9H9Q4, P39748, P78527	0.224819
hsa00900:Terpenoid backbone biosynthesis	12	P14324, Q01581, P24752, Q9UHG3, Q15126, Q13907, Q9BWD1, P53602, Q03426, P49354, P49356, O75844	0.156121		hsa00380:Tryptophan metabolism	18	P24752, P51648, P04040, Q02218, P30837, Q6YP21, P05091, Q16773, P27338, P49189, P30084, Q9BWD1, P40939, P21397, Q92947, Q16836, Q08426, P49419	0.247961		hsa04961:Endocrine and other factor-regulated calcium reabsorption	20	Q5JWF2, P17252, P50570, P54709, P50148, Q01970, P62491, P63010, Q05193, P50993, O94973, Q00610, O95782, P05023, P22694, P53680, P09497, Q96CW1, P05026, P09496	0.233983
hsa05214:Glioma	28	P06400, P17252, P19174, P27361, Q02750, P10398, Q07889, P62158, P04049, P27986, P62993, P42338, P16885, P31751, P28482, Q13555, Q00534, P01116, P60484, P42345, O00459, P00533, P36507, P29353, P31749, Q13557, P01111, P15056	0.156163		hsa05168:Herpes simplex infection	67	P00973, Q9UHD2, P42224, Q07021, P29692, P62136, O43318, Q712K3, Q16629, Q13243, Q13616, Q13242, P61978, Q9BYX4, P10314, Q96SB4, P62140, Q14790, Q13247, Q93009, Q7Z434, P24928, P04637, Q07955, P52630, O95786, Q04206, P19784, Q9Y6K5, P84103, Q92692, P36873, P67870, Q03519, Q03518, P06493, P68400, P51610, O15111, O00268, P63208, Q9BRL6, Q86V81, Q13158, Q06124, P23497, Q9Y6K9, Q15542, P23458, Q09472,…	0.252079		hsa05168:Herpes simplex infection	67	P42224, Q07021, P29692, P62136, O43318, Q712K3, Q16629, Q13243, Q13616, Q13242, P61978, Q96SB4, P49848, P62140, Q13247, Q93009, Q7Z434, P24928, P04637, Q07955, P52630, Q04206, Q9Y6K5, P19784, P84103, Q99836, Q92692, P36873, P67870, Q03519, Q03518, P06493, P68400, O00463, P51610, O15111, O00268, P63208, Q9BRL6, Q86V81, Q13158, Q06124, P23497, Q15542, P23458, Q09472, Q15653, P19525, Q9NZM5, P62380,…	0.275178
hsa05168:Herpes simplex infection	69	Q9UHD2, P42224, Q07021, P29692, P62136, O43318, P10316, Q712K3, Q9P2K8, Q16629, Q13243, Q13616, Q13242, P13747, P61978, P10314, P16188, Q96SB4, P49848, P62140, Q14790, Q13247, Q93009, Q7Z434, P24928, Q07955, P52630, O95786, Q04206, P45983, P19784, Q9Y6K5, P84103, Q99836, Q92692, P36873, P67870, Q03519, Q03518, P06493, P68400, P51610, O15111, O00268, P63208, Q86V81, Q13158, Q06124, P23497, Q9Y6K9,…	0.156497		hsa04730:Long-term depression	25	P08754, Q5JWF2, Q14573, Q03113, Q14571, P17252, P30154, P30153, P50148, Q01970, P27361, Q02750, P10398, P47712, P04899, P08069, Q14344, P67775, P28482, P01116, P36507, P63096, P01111, P29992, P15056	0.258034
hsa04931:Insulin resistance	43	Q06210, O60502, P36873, P23443, Q15349, P06737, P62136, Q9Y2P4, P11166, P10586, P27986, O15530, P54619, Q15257, P31751, Q06124, Q16822, P11216, P42345, Q9Y478, P13807, Q13131, O60343, P62140, O15294, P49841, P51812, O94808, Q05655, P19838, O14975, P18031, P16220, Q15418, P42338, P50416, Q04206, Q6PCB7, P60484, O00459, P40763, P31749, P45983	0.164791		hsa04720:Long-term potentiation	27	Q14573, Q14571, P36873, P17252, Q15349, Q08209, Q01970, Q02750, P10398, P16298, P62136, P62158, P28482, P36507, P63098, P61224, P15056, Q09472, P62140, P51812, P50148, P27361, Q15418, Q13555, P01116, Q13557, P01111	0.266768
hsa04540:Gap junction	36	P07437, P04350, Q14573, Q71U36, P12931, Q3ZCM7, P17252, Q01970, Q02750, P06493, P68371, P04899, P48730, P62993, P68366, P28482, Q9BQE3, P17612, P36507, P63096, P22694, Q9BUF5, P29992, Q07157, P08754, Q5JWF2, Q13509, P50148, P27361, Q07889, P04049, Q13885, P01116, P00533, P01111, Q9H4B7	0.166261
hsa05215:Prostate cancer	36	Q02750, P10398, P35222, O15111, P07900, P27986, P14625, O15530, P62993, P31751, P28482, P42345, P36507, Q9Y6K9, P55211, Q9NQB0, P15056, P06400, Q09472, P49841, Q92934, P27361, P19838, P24941, Q07889, P16220, P04049, P08238, P42338, Q04206, P01116, P60484, O00459, P00533, P01111, P31749	0.166261
hsa05160:Hepatitis C	51	Q9Y6K5, P60228, P63151, Q9UHD2, P42224, P01130, P30154, P30153, P53778, P10398, Q8WTV0, O15111, Q13546, P27986, P61289, P62993, O15530, P31751, Q9P2K8, P28482, Q9Y6K9, P15056, P19793, P23458, P60033, P49841, Q92934, P19525, P27361, P19838, Q12933, Q07889, Q7Z434, Q14653, P04049, P52630, P42338, O95786, P67775, Q15628, Q04206, P05198, P01116, O00459, Q16539, P00533, P40763, P01111, O75925, P31749,…	0.201448
hsa00260:Glycine, serine and threonine metabolism	18	Q9Y617, P18669, Q8NE62, P34896, P34897, Q96GA7, O43175, P23434, P09622, O75600, P27338, Q14353, P21397, Q9UBQ7, P15259, P32929, P78330, P49419	0.201895
hsa00410:beta-Alanine metabolism	15	P51648, P47895, P19623, Q02252, P30837, P05091, P11310, Q6NVY1, Q96KP4, P49189, P30084, P52788, P40939, Q08426, P49419	0.202599
hsa05161:Hepatitis B	55	Q16531, Q9UHD2, P42224, P12931, O00571, P31946, P42226, P27986, P62993, Q92466, Q00534, P36507, P55211, P06400, Q14790, Q92934, P16220, Q7Z434, P52630, O95786, Q04206, P45985, P60484, O00459, P45983, Q9Y277, Q99836, P17252, Q02750, O15111, O14727, P27348, Q13158, P31751, P28482, Q15904, P12004, Q9Y6K9, P63104, P23458, Q09472, O43504, P27361, P19838, P24941, Q14653, P04049, P42338, Q13485, P25445,…	0.204033
hsa03450:Non-homologous end-joining	8	P49959, Q92878, P12956, Q13426, P13010, Q9H9Q4, P39748, P78527	0.206171
hsa00061:Fatty acid biosynthesis	8	Q13085, Q9ULC5, Q9NWU1, O95573, P49327, Q8IVS2, P33121, O60488	0.206171
hsa04915:Estrogen signaling pathway	39	Q14573, P34931, P12931, Q02790, Q01970, Q02750, Q13451, P04899, P62158, P07900, P27986, P11142, P62993, P14625, P31751, P28482, P17612, P36507, P63096, P22694, P17066, P29353, P08754, Q5JWF2, P54652, P50148, P27361, Q05655, Q07889, P16220, P04049, P08238, P42338, P0DMV8, P01116, O00459, P00533, P01111, P31749	0.21585
hsa04152:AMPK signaling pathway	47	P63151, Q01813, P23443, P61026, P30154, P30153, P49815, P61006, P17858, Q15717, O43318, Q96B36, P61106, P27986, Q13362, Q9Y376, O15530, P54619, P31751, Q15382, Q16822, Q14738, Q15907, P42345, Q9Y478, P13807, Q96EB6, Q13131, Q15172, Q13541, P49327, O60825, P61019, P16220, Q13085, P13639, P08237, P42338, P50416, P67775, O00418, Q8N122, Q9H9S4, O00459, O00767, Q16537, P31749	0.232064
hsa00380:Tryptophan metabolism	18	P24752, P51648, P04040, Q02218, P30837, Q6YP21, P05091, Q16773, P27338, P49189, P30084, Q9BWD1, P40939, P21397, Q92947, Q16836, Q08426, P49419	0.232818
hsa05164:Influenza A	64	Q9UHD2, P42224, P52594, P60709, P53778, P21796, P14324, P11142, P27986, Q9P2K8, P36507, Q9BUJ2, P55211, P52294, P49841, Q7Z434, P52630, O95786, Q9Y6Y0, Q04206, P45985, Q86UT6, Q16539, O00459, P45983, Q9Y6K5, Q99836, O14763, P34931, P17252, Q02750, P25685, P31751, P28482, P52292, Q14116, Q13217, P46734, Q14258, P17066, Q86U42, P23458, Q09472, P78406, P19525, P55265, P54652, P27361, P19838, O95639,…	0.245574

## Sheet: Small-EVs
Figure 3 Small-EV KEGG analysis
Benjamini-Hochberg corrected p-values
HCT116 Whole Small-EV Proteins 835					HT29 Whole Small-EV Proteins 1524					SW620 Whole Small-EV Proteins 824
Term:	Gene Count:	Gene Uniprot ID	Benjamini Value:		Term:	Gene Count:	Gene Uniprot ID	Benjamini Value:		Term:	Gene Count:	Gene Uniprot ID	Benjamini Value:
hsa04144:Endocytosis	61	Q99816, Q96QK1, P61204, P12931, Q9HAU4, P01892, Q15286, P61006, Q9H444, P63010, Q86VN1, Q9H4M9, P11142, Q96EY5, P30455, P59998, Q96J02, Q9BPX5, P02786, Q8WUM4, P50570, O15511, P62491, Q9H9H4, Q9BYG5, Q99961, P47755, P47756, Q96PU5, Q7LBR1, Q9BY43, P61586, Q9BRG1, P30466, O43633, Q9UQ16, P60953, P61026, P61020, Q9NZN4, O14964, Q9NZN3, Q8TEW0, Q9H223, P33176, A5D8V6, Q00610, Q9UK41, P53990, Q9NP79,…	1.12799e-13		hsa01130:Biosynthesis of antibiotics	84	P24752, Q06210, Q16222, P04406, P17174, P53597, P06733, Q99714, O95394, P48735, O43175, P29401, P17858, P14324, P07738, P00568, P53396, Q01433, P36957, P49419, Q9NR19, P40925, P40926, Q96C36, P18669, P10515, P06744, P09972, P27144, P36871, P49189, P00558, P08237, P11413, P52209, O15067, P49247, P14550, Q16836, P78330, Q15493, Q16851, Q9UIJ7, Q01813, P04075, Q03154, P00505, P04424, P11766, P09622,…	6.26601e-19		hsa03010:Ribosome	55	P36578, P62750, P62277, Q07020, P27635, P62753, P08865, P61353, P32969, P62280, P62899, P18621, P62424, P62269, P61247, P62266, P62829, P61313, P62263, P23396, P62851, P15880, Q02543, P49207, P39019, P61254, P62917, Q02878, P39023, P18124, P46776, P46777, P46778, P35268, P46779, P63173, P30050, P62249, P84098, P62906, P62241, P62244, P46782, P62701, P46781, P60866, P46783, P42766, P05388, P62081,…	1.53127e-25
hsa03050:Proteasome	25	P43686, P35998, P25788, O43242, Q13200, P25789, P25786, P25787, Q99460, Q99436, P62195, P28072, P28070, O14818, Q15008, P17980, P62333, P51665, P60900, P49721, O00231, P49720, P62191, P28066, O00232	1.69198e-13		hsa03010:Ribosome	63	P36578, P62750, P62277, Q07020, P62753, P27635, P08865, P32969, P62280, P18621, P62424, P62269, P62266, P61247, Q7Z2W9, P62829, P47914, P63220, P61313, P62263, P23396, P62851, P15880, Q02543, P39019, P62913, P61254, P62917, Q02878, P49406, P39023, P18124, P46776, P46777, P46778, P35268, P46779, P30050, P63173, P62249, Q9BYD6, P84098, P62906, P62241, P62244, P46782, P62701, P46781, P60866, P05387,…	4.64237e-18		hsa03050:Proteasome	22	P43686, P35998, P25788, Q13200, P25789, P25786, P25787, Q99460, O00487, P62195, Q99436, P28072, P28070, Q15008, P17980, P51665, P62333, O00231, P49721, P62191, O00232, P28066	2.39658e-11
hsa04810:Regulation of actin cytoskeleton	55	P46940, P12931, P62070, P55160, P48736, Q9Y6W5, P23528, P26006, P62136, P18084, P07737, P15311, P15153, P59998, O43707, Q9BPX5, P05556, P62140, Q9Y281, P26038, O15511, P05106, P63000, O14950, Q14344, P61586, P02751, P18206, P60953, Q9UQB8, Q02750, P35609, P12814, Q9UBI6, P17301, P06756, Q7L576, P28482, P60763, Q86VI3, O15145, O96013, O15143, P16144, P35241, P49023, Q05397, P63261, Q9Y2A7, P10301,…	3.19633e-13		hsa04144:Endocytosis	84	Q99816, Q96QK1, P61204, Q9NR46, P12931, O75351, Q15286, P61006, Q9H444, Q8N6H7, P61073, P84022, P63010, Q86VN1, Q9H4M9, P11142, Q96EY5, P30455, Q96B97, P59998, Q96J02, P25098, Q9BPX5, Q9UL26, P02786, Q8WUM4, P50570, O15511, Q9Y5X3, Q9H9H4, P62491, Q9UBC2, Q9BYG5, P40818, P08069, P47755, P47756, Q96PU5, Q7LBR1, Q9BY43, P61586, Q9BRG1, O95782, Q96CW1, Q92747, Q13596, P60953, Q9UQ16, O43633, P61026,…	2.21538e-15		hsa01130:Biosynthesis of antibiotics	47	Q16851, P24752, P04406, Q01813, P17174, P04075, P06733, P00505, P04424, P09622, O43175, P29401, P05091, P30566, P54819, P22392, O95336, P22102, P13929, Q9BWD1, Q96I99, P53396, P36957, P60174, P37837, P40926, Q9Y617, P00966, Q06203, P18669, P00338, P34897, P06744, P31939, P07195, P22234, P36871, P00558, P49189, O75874, P11413, O15067, P52209, P07954, O75390, P78330, P21399	2.12474e-10
hsa03010:Ribosome	43	P36578, P18124, P46776, P46777, P35268, P46778, P46779, Q07020, P62753, P27635, P61353, P08865, P30050, P62280, P62249, P62424, P62269, P84098, P61247, P62906, P62266, P62241, P62829, P61313, P62263, P23396, P62851, P62701, P46781, P15880, Q02543, P49207, P05388, P83731, P62913, P62917, Q02878, P50914, P40429, Q9Y3U8, P26373, P39023, P62847	3.24296e-13		hsa01200:Carbon metabolism	49	Q15493, P24752, P04406, Q01813, P53597, P17174, P04075, P06733, P00505, P48735, P09622, P11766, O43175, P29401, P17858, P31040, O95336, P13929, Q9BWD1, P36957, P11498, Q9NR19, P40925, P60174, P37837, P40926, Q9Y617, P18669, Q9NUB1, P10515, P34897, P06744, P09972, P08237, P60891, P00558, O75874, P11413, P52209, P30084, P40939, P49247, P14618, P07954, P50213, Q99798, O75390, P78330, P21399	1.61049e-12		hsa01200:Carbon metabolism	30	P24752, P04406, Q01813, P17174, P06733, P04075, P00505, O43175, P09622, P29401, O95336, P13929, Q9BWD1, Q96I99, P36957, P60174, P37837, P40926, Q9Y617, P18669, P34897, P06744, P00558, O75874, P52209, P11413, P07954, O75390, P78330, P21399	3.25615e-08
hsa05100:Bacterial invasion of epithelial cells	32	P02751, P18206, P12931, Q9UHD8, Q9UQ16, P60953, P08581, Q9NVA2, P48736, Q9Y6W5, P35221, Q9Y5K6, P35222, P12830, P84095, Q00610, P59998, Q9BPX5, P05556, O15145, O15143, P50570, Q15019, O15511, P63000, Q92556, Q05397, P49023, Q13418, P61586, P63261, Q92599	4.22995e-13		hsa03050:Proteasome	28	P35998, P43686, P25788, Q13200, O43242, P25789, P25786, P25787, Q14997, Q99460, O00487, P62195, Q99436, P20618, P17980, P28066, P28074, P28072, P28070, O14818, Q15008, P62333, P60900, O00231, P49721, P62191, P49720, O00232	9.76386e-12		hsa01230:Biosynthesis of amino acids	23	P60174, P04406, P37837, Q01813, P00966, Q9Y617, P18669, P31153, P17174, P06733, P04075, P34897, P00505, P04424, O43175, P29401, Q9NZL9, P13929, O75874, P00558, O75390, P78330, P21399	9.50072e-08
hsa04510:Focal adhesion	49	P17655, P49746, P12931, P48736, P26006, P62136, P18084, P15153, O43707, P05556, P62140, Q9Y490, P12111, P21333, O75369, P05106, P63000, O14950, O15230, P61586, Q13418, P02751, P18206, P60953, P08581, Q02750, P35222, P35609, Q9HBI1, P12814, P17301, P06756, P28482, P07942, P60763, P11047, P07996, P61224, P12110, O96013, P16144, Q14315, P50552, P12109, P49023, Q05397, P63261, P23229, P00533	2.99527e-10		hsa04520:Adherens junction	36	P46940, P19784, P18206, Q92692, P12931, P60953, P08581, P60709, P67870, Q9UQB8, Q9Y6W5, P35221, P84022, P68400, P35222, P35609, Q8TEW0, P12814, P55196, P10586, P12830, P15153, O60716, P28482, P06241, O43707, P07947, Q07157, Q12913, Q8WWI1, P63000, P08069, P61586, P63261, P00533, P26232	1.76775e-11		hsa04144:Endocytosis	44	Q99816, Q96QK1, Q9Y3E7, O75351, P60953, P61026, Q15286, P61006, Q9H444, P61020, P63010, Q86VN1, Q9H4M9, Q9H223, P33176, P52907, P11142, Q96EY5, O94973, Q00610, P59998, P25098, Q9UK41, P53990, Q9NP79, Q9BPX5, P02786, O15145, Q8WUM4, P51149, P62491, Q9UBC2, Q9UN37, P51148, P20339, P47756, P0DMV8, Q9BY43, P61586, P62330, Q9BRG1, O95782, P05534, Q96CW1	3.26164e-07
hsa01130:Biosynthesis of antibiotics	49	Q16222, Q06210, P09467, P04406, P17174, P06733, O95394, O43175, P29401, P17858, P07738, P53396, Q01433, P36957, Q53H96, P40925, P40926, Q9NPH2, P18669, P06744, P36871, P00558, P08237, P49189, O15067, P52209, P11413, P14550, Q16851, Q15493, Q01813, P04075, P04424, P30566, P22392, P22102, O95336, P13929, P37837, P60174, P00966, Q9Y617, P00338, P07195, P31939, O43252, P22234, O75874, P21399	7.72026e-10		hsa01230:Biosynthesis of amino acids	36	P04406, Q01813, P31153, P17174, P04075, P06733, Q03154, P00505, P48735, P04424, O43175, P29401, P17858, P13929, P11498, P60174, P37837, Q9Y617, P00966, P18669, Q96C36, P34897, P54886, P09972, Q9NZL9, P08237, P60891, P00558, O75874, P49247, P50213, P14618, Q99798, O75390, P78330, P21399	2.57246e-11		hsa04520:Adherens junction	22	P46940, P19784, P18206, P60953, Q8WWI1, Q9UQB8, P67870, Q9Y6W5, P68400, P35222, P63000, P12814, P55196, P29350, O60716, P61586, P28482, P63261, P06241, O43707, P07947, Q07157	3.57299e-07
hsa04520:Adherens junction	26	P46940, P18206, P12931, P60953, P08581, P67870, Q9UQB8, P35221, Q9Y6W5, P68400, P35222, P35609, P63000, Q8TEW0, P55196, P12814, P12830, P15153, O60716, P61586, P28482, P63261, P60763, O43707, P00533, Q07157	2.54803e-09		hsa04810:Regulation of actin cytoskeleton	69	P46940, Q9NYB9, O60610, P12931, P62070, P60709, Q9Y6W5, P10398, P23528, P62136, P26006, P18084, P07737, P27986, P15311, P18564, P15153, P59998, O43707, P36507, Q9BPX5, P05556, P62140, Q8WUW1, P26038, O15511, P05106, P63000, O14950, Q14344, P56199, P61586, Q92747, P02751, Q92888, P18206, P60953, P36873, Q9UQB8, Q02750, P35609, P12814, Q9UBI6, P06756, P17301, Q7L576, P28482, Q9NRY4, Q86VI3, O15144,…	2.86878e-11		hsa05130:Pathogenic Escherichia coli infection	17	P07437, Q9BPX5, Q92974, P60953, Q71U36, P05556, O15145, P35222, P68371, P15311, P68366, P61586, P63261, P06241, P59998, P19338, Q14247	6.57756e-06
hsa05130:Pathogenic Escherichia coli infection	20	Q13509, P04350, P07437, Q9BPX5, P60953, Q71U36, P05556, O15145, O15143, O15511, P35222, P68371, P12830, P15311, P68366, P61586, P63261, P59998, Q13885, Q9BUF5	1.47755e-07		hsa05100:Bacterial invasion of epithelial cells	37	Q92747, P02751, P18206, P12931, P60953, Q9UHD8, Q9UQ16, P08581, Q9NVA2, P60709, Q9Y6W5, P35221, Q9Y5K6, P35222, Q05193, P27986, P12830, P84095, Q00610, P59998, Q9BPX5, O15144, P05556, O15145, O15143, P50570, Q15019, O15511, P63000, Q05397, P49023, Q13418, P61586, P63261, Q92599, P26232, Q14247	6.67513e-11		hsa04810:Regulation of actin cytoskeleton	36	P46940, P18206, O60610, P60953, P36873, P62070, Q9UQB8, Q9Y6W5, Q02750, P10398, P23528, P62136, P12814, P07737, P15311, Q7L576, P28482, P59998, O43707, Q9BPX5, Q86VI3, P05556, O15145, P26038, P16144, P63000, O14950, Q14344, P35241, P49023, P61586, P63261, Q9Y2A7, P01116, P23229, P01111	3.48495e-05
hsa05205:Proteoglycans in cancer	42	P46940, P02751, P12931, P60953, P62070, P08581, P48736, P35052, P62753, Q02750, P35222, P62136, P18084, P15311, P17301, P06756, P16885, Q06124, P28482, P08962, P07996, P98160, P62140, P05556, P26038, P21333, O75369, P05106, P63000, Q14315, P35241, Q05397, P49023, P61586, P63261, P10301, P00749, P01116, P16070, P00533, P40763, Q13557	3.79718e-07		hsa04510:Focal adhesion	60	P17655, O60610, P12931, P60709, P62136, P26006, P18084, P27986, P62993, O15530, P18564, P15153, O43707, P12111, P05556, P62140, Q9Y490, P21333, O75369, P05106, P63000, O14950, P08069, O15230, P56199, Q13418, P61586, P35443, P02751, P18206, P60953, P36873, P08581, Q02750, P35222, P35609, Q9HBI1, P12814, P17301, P06756, P28482, P06241, P07942, P11047, Q9NRY4, P07996, P61224, P12110, O96013, P16144,…	1.71191e-07		hsa05100:Bacterial invasion of epithelial cells	19	Q9BPX5, P18206, P60953, Q9UHD8, P05556, O15145, Q15019, Q9Y6W5, Q9Y5K6, P35222, P63000, P49023, P61586, Q13418, P63261, Q00610, P59998, Q92599, Q14247	0.000137188
hsa04670:Leukocyte transendothelial migration	29	P18206, P60953, P48736, P35221, P35222, P35609, P04899, P12814, P55196, O15551, P15311, P15153, P16885, O60716, Q06124, O43707, P63096, P61224, P08754, P05556, P26038, P63000, O14950, P50552, Q05397, P49023, P61586, P63261, Q9Y624	1.50292e-06		hsa05130:Pathogenic Escherichia coli infection	24	Q92747, P07437, Q9BPX5, Q92974, P60953, O15144, Q71U36, P05556, O15145, O15143, P60709, O15511, P35222, P68371, P12830, P15311, P68366, P61586, O75116, P63261, P06241, P59998, Q9BUF5, Q14247	9.40828e-07		hsa03040:Spliceosome	23	P84103, P52272, P26368, O75643, Q13247, P17844, Q15029, Q13838, Q07955, P11142, P07910, O43143, Q16629, P62318, P0DMV8, Q15393, Q6P2Q9, P38919, Q00839, P61978, P09651, Q15365, Q01130	0.00308271
hsa04145:Phagosome	34	P07437, P04350, Q9Y6G9, P49746, O15400, Q71U36, P01892, P61020, P68371, O14964, Q8WTV0, P05164, P18084, Q9Y5K8, P06756, P17301, P38606, P68366, P30455, P07996, Q9BUF5, Q13509, P31146, P05556, P02786, P51149, P05106, P21281, P51148, P63000, P20339, Q14204, P63261, Q13885, P30466, P30485	1.57689e-06		hsa00010:Glycolysis / Gluconeogenesis	27	P04406, Q01813, P06733, P04075, P11766, P09622, P17858, P05091, P07738, P13929, P49419, Q9NR19, P60174, P51648, Q9NUB1, P18669, P00338, P10515, P06744, P07195, P09972, P36871, P49189, P00558, P08237, P14550, P14618	4.66601e-06		hsa00970:Aminoacyl-tRNA biosynthesis	15	P26640, P56192, O43776, Q15046, P07814, P49588, P14868, Q9NSD9, P26639, P47897, P41252, P41250, P54577, P54136, P23381	0.0033259
hsa01230:Biosynthesis of amino acids	21	P60174, P04406, Q53H96, P37837, P00966, Q9Y617, Q01813, P18669, P17174, P31153, P06733, P04075, P04424, O43175, P29401, P17858, P13929, O75874, P00558, P08237, P21399	1.10154e-05		hsa05205:Proteoglycans in cancer	55	P46940, P12931, P62070, P60709, P62753, P10398, P62136, P18084, P27986, P15311, P62993, O15530, P16885, P08962, P36507, P98160, P22694, P18827, P05556, P62140, P26038, P21333, P17844, O75369, P05106, P63000, P04637, P08069, P61586, P02751, Q92888, P36873, P60953, P08581, Q02750, P35222, P23588, P17301, P06756, Q06124, P28482, P42345, P07996, P35241, P49023, Q05397, O75116, P63261, P10301, P01116,…	5.09995e-06		hsa00010:Glycolysis / Gluconeogenesis	15	P60174, P04406, Q01813, P18669, P00338, P04075, P06733, P06744, P07195, P09622, P05091, P36871, P13929, P00558, P49189	0.00363465
hsa00030:Pentose phosphate pathway	13	Q15493, P09467, P37837, Q01813, P04075, P06744, P29401, P17858, P36871, O95336, P08237, P52209, P11413	1.77544e-05		hsa05131:Shigellosis	25	Q92747, Q9BPX5, P18206, P12931, O60610, P60953, O15144, P05556, O15145, O15143, P60709, O15511, Q9Y6W5, Q01081, P63000, P07737, P84095, P28482, O75116, P63261, Q04206, P59998, P35080, P16070, Q14247	2.28719e-05		hsa00270:Cysteine and methionine metabolism	11	O43865, P40926, Q9NZL9, P19623, P17174, P52788, P31153, P00338, P00505, P07195, P23526	0.00385608
hsa01200:Carbon metabolism	26	Q15493, P04406, P09467, Q01813, P17174, P06733, P04075, O43175, P29401, P17858, O95336, P13929, P36957, P40925, P37837, P60174, P40926, Q9Y617, P18669, P06744, O75874, P00558, P08237, P52209, P11413, P21399	4.12956e-05		hsa00620:Pyruvate metabolism	19	P11498, P24752, Q9NR19, P40925, P51648, P40926, Q9NUB1, P10515, P00338, Q04760, P07195, P09622, P05091, Q13085, P49189, Q9BWD1, P07954, P14618, P49419	2.37189e-05		hsa05205:Proteoglycans in cancer	29	P46940, P36873, P60953, P62070, P62753, Q02750, P10398, P35222, P62136, P23588, P15311, P29350, P62993, Q06124, P28482, P98160, P05556, P26038, P21333, P17844, O75369, P63000, P35241, P49023, P61586, P63261, P01116, P01111, Q14247	0.00533667
hsa04015:Rap1 signaling pathway	38	P29317, P12931, P60953, P08581, P48736, Q01970, Q02750, P35222, P04899, Q8TEW0, P62158, P55196, P07737, P11233, P11234, P12830, P15153, O60716, P28482, P60763, Q7LDG7, P63096, P07996, P61224, P08754, Q9Y490, P05556, P05106, P63000, Q9BYG5, P50552, P61586, P63261, Q9BZL6, P10301, P35080, P01116, P00533	6.16298e-05		hsa00020:Citrate cycle (TCA cycle)	16	P11498, P31040, P40925, P40926, O75874, P53597, P10515, P53396, P48735, P50213, P07954, Q99798, P36957, P09622, O75390, P21399	2.92871e-05		hsa04530:Tight junction	17	P63151, P60953, Q6P1M3, P51153, P30153, Q9UDY2, P35579, O14950, P55196, P12814, P35580, P61586, P63261, O43707, Q9Y624, Q07157, Q14247	0.00535868
hsa05131:Shigellosis	18	Q9BPX5, P18206, P60953, P12931, P05556, O15145, O15143, O15511, Q9Y6W5, P63000, Q92556, P07737, P84095, P63261, P28482, P59998, P35080, P16070	0.000116223		hsa04670:Leukocyte transendothelial migration	36	P18206, P60953, P60709, P35221, P61073, P35222, P04899, P35609, P12814, P55196, O15551, P27986, P15311, P15153, P16885, O60716, O95832, Q06124, Q9NRY4, O43707, P63096, Q96AP7, P61224, P08754, P05556, P26038, P63000, O14950, P50552, Q05397, P49023, P61586, P63261, O75116, Q9Y624, P26232	2.95096e-05		hsa04670:Leukocyte transendothelial migration	20	P08754, P18206, P60953, P05556, P26038, P35222, P63000, O14950, P12814, P55196, P50552, P15311, P49023, O60716, P61586, Q06124, P63261, O43707, Q9Y624, P61224	0.00570844
hsa04512:ECM-receptor interaction	21	P02751, P49746, P12110, P12111, P05556, O00468, P16144, P05106, P26006, P18084, P06756, P17301, O15230, P12109, P07942, P11047, P23229, P07996, P16070, P98160, Q08722	0.000191475		hsa04530:Tight junction	29	P63151, P62714, P60953, P12931, P51153, O95049, P60709, P30153, Q9UDY2, P35609, Q8TEW0, P12814, P55196, O15551, P41743, Q15334, O95832, O43707, Q07157, Q6P1M3, P35579, O14950, Q9BYG5, P35580, Q7Z406, P61586, P63261, Q9Y624, Q14247	8.64118e-05		hsa00030:Pentose phosphate pathway	9	P37837, Q01813, P36871, O95336, P11413, P52209, P04075, P06744, P29401	0.00908612
hsa00010:Glycolysis / Gluconeogenesis	18	P60174, P04406, P09467, Q01813, P18669, P06733, P00338, P04075, P06744, P07195, P17858, P07738, P36871, P13929, P00558, P08237, P49189, P14550	0.000202159		hsa00030:Pentose phosphate pathway	15	Q15493, P37837, Q01813, P04075, P06744, P29401, P17858, P09972, P36871, O95336, P60891, P08237, P52209, P11413, P49247	9.88377e-05		hsa00020:Citrate cycle (TCA cycle)	9	P40926, O75874, Q96I99, P53396, P07954, P36957, P09622, O75390, P21399	0.0110146
hsa05132:Salmonella infection	20	Q9Y6G9, Q9BPX5, P60953, O15145, O15143, P21333, O15511, Q9Y6W5, P51149, O75369, P63000, Q14315, P07737, P84095, Q14204, P63261, P28482, P59998, P35080, Q07157	0.000286729		hsa04141:Protein processing in endoplasmic reticulum	45	P17655, Q07065, P31689, Q12907, P39656, P27797, P25685, Q9UMX0, P13667, P07900, P11142, P14625, O95757, Q99683, Q13616, P04843, P51572, P11021, P55072, P51571, P04844, P30101, Q9H3Z4, P27824, Q8NBS9, Q99442, O60884, P07384, P30040, P61619, P46977, P54727, Q15436, Q15084, Q9NYU2, P14314, P08238, Q14697, Q07812, P0DMV8, Q13724, P07237, P05198, Q9Y4L1, Q92598	0.000122353		hsa05203:Viral carcinogenesis	28	P60953, Q14160, O00571, P31946, P06493, P61981, P12814, Q7KZF4, P62993, P28482, Q00534, O43707, P61978, P63104, P07948, P62805, Q5T4S7, P63000, P62258, P49023, P61586, Q04917, P05534, P01116, P62191, P01111, Q9Y277, Q12959	0.0140728
hsa00051:Fructose and mannose metabolism	12	P60174, Q9Y5P6, P09467, Q01813, P08237, P04075, Q00796, P15121, O60218, O15305, Q8N0W3, P17858	0.000291609		hsa03040:Spliceosome	37	P84103, Q12874, Q7L014, Q9UMS4, O75533, P62306, Q15029, Q01081, P14678, P11142, Q16629, P62995, Q6P2Q9, P38919, Q00839, P61978, P09651, P52272, O94906, P26368, O75643, Q13247, P17844, Q07955, P07910, P62314, P62316, O43143, P62318, P0DMV8, Q8NI27, Q15393, Q15365, O43447, Q01130, P09661, P38159	0.000305942		hsa04510:Focal adhesion	28	P18206, P36873, P60953, O60610, Q02750, P35222, P62136, P12814, P62993, P28482, P06241, O43707, P61224, Q9Y490, P05556, P21333, P16144, Q15942, O75369, P63000, O14950, P50552, P12109, P49023, P61586, Q13418, P63261, P23229	0.0144277
hsa04666:Fc gamma R-mediated phagocytosis	20	Q92608, Q9BPX5, P60953, Q9Y281, O15145, O15143, P48736, O15511, Q9Y6W5, Q02750, P49006, P23528, P63000, P50552, P15153, P16885, P28482, P62330, P59998, P07948	0.000327644		hsa04145:Phagosome	40	P35443, P07437, Q9Y6G9, O15400, Q71U36, Q15836, P27797, P60709, P61020, O14964, P68371, Q93050, Q8WTV0, P05164, P18084, P06756, P17301, P38606, P68366, P30455, P07996, Q9BUF5, P31146, P27824, P05556, P02786, Q9UI12, P11279, P51149, P05106, P21281, P61619, P15313, P51148, P63000, P20339, O75396, Q14204, P63261, P16671, P05534	0.000369866		hsa00620:Pyruvate metabolism	10	P24752, P40926, P49189, Q9BWD1, P00338, Q04760, P07954, P07195, P09622, P05091	0.0163792
hsa04530:Tight junction	20	P60953, P62714, P12931, Q6P1M3, P51153, P30153, P35609, P35579, Q8TEW0, O14950, Q9BYG5, P55196, P12814, O15551, P35580, P61586, P63261, O43707, Q9Y624, Q07157	0.000526912		hsa00071:Fatty acid degradation	17	P24752, P49748, P51648, P42126, P42765, O95573, P11766, P05091, Q9ULC5, P49189, P30084, Q9BWD1, P40939, P55084, Q16836, O60488, P49419	0.00071354		hsa05131:Shigellosis	13	Q9BPX5, P18206, P60953, O60610, P05556, O15145, Q9Y6W5, P63000, P07737, P63261, P28482, P59998, Q14247	0.0166798
hsa04360:Axon guidance	24	P08754, P29317, P60953, P05556, Q99985, Q9Y281, O96013, P08581, O15031, P23528, P04899, P63000, O75044, Q16555, P15153, Q05397, P61586, P28482, P60763, P01116, P63096, P29323, Q13275, P98172	0.00184531		hsa05132:Salmonella infection	26	Q92747, Q9Y6G9, P60953, P60709, Q9Y6W5, P07737, P84095, P28482, P59998, Q07157, Q9BPX5, O15144, O15145, O15143, P21333, O15511, Q9NSK0, P51149, O75369, P63000, Q14204, Q04206, P63261, O75116, P35080, Q16513	0.000714271		hsa04141:Protein processing in endoplasmic reticulum	24	P30101, P27824, Q12907, P39656, P25685, O60884, P07384, P30040, O94979, P13667, Q15084, P07900, P11142, Q14697, P14625, P08238, P0DMV8, P07237, P04843, P11021, P05198, Q9Y4L1, P55072, Q92598	0.0172425
hsa04540:Gap junction	19	P08754, Q13509, P04350, P07437, P12931, Q71U36, Q01970, Q02750, P68371, P04899, P68366, P28482, Q13885, P01116, P00533, P63096, Q9BUF5, P29992, Q07157	0.00186008		hsa04611:Platelet activation	35	Q92888, P12931, P36873, P60709, Q01970, P04899, P62136, P27986, P41743, P17301, P16885, P43405, P28482, P06241, Q9NRY4, Q7LDG7, P63096, P22694, P61224, P07948, P08754, Q5JWF2, O00161, Q9Y490, P62140, P05556, P50148, P05106, O14950, Q14344, P50552, P61586, P63261, O75116, Q86UX7	0.000917199		hsa05132:Salmonella infection	15	Q9Y6G9, Q9BPX5, P60953, O15145, P21333, Q9Y6W5, P51149, O75369, P63000, P07737, Q14204, P63261, P28482, P59998, Q07157	0.0178723
hsa05230:Central carbon metabolism in cancer	15	O15427, Q01813, P18669, P08581, P48736, Q02750, Q01650, P17858, P11166, Q15758, P08237, P11413, P28482, P01116, P00533	0.00447185		hsa04360:Axon guidance	34	P29317, Q99985, P60953, P08581, Q08209, P61073, O15031, P23528, P04899, Q16555, P54753, P15153, O43157, P28482, Q00535, P06241, P63096, P08754, P20936, P05556, O96013, Q13177, P63000, O75044, Q9UIW2, O75051, Q05397, P54760, P61586, O75116, P52799, P01116, P98172, P01111	0.00127971		hsa05211:Renal cell carcinoma	12	P11166, P60953, P62993, Q06124, P28482, P07954, Q02750, P01116, P10398, P01111, P61224, P63000	0.055528
hsa04611:Platelet activation	23	P08754, Q9Y490, P05556, P12931, P62140, P48736, Q01970, P05106, P04899, P62136, O14950, Q14344, P50552, P17301, P16885, P61586, P28482, P63261, Q7LDG7, P63096, Q86UX7, P07948, P61224	0.00600812		hsa00051:Fructose and mannose metabolism	14	Q9Y5P6, P60174, Q01813, P04075, Q00796, O60218, O60547, Q8N0W3, Q96IJ6, P17858, P09972, P08237, P15121, O15305	0.00139127		hsa00250:Alanine, aspartate and glutamate metabolism	8	P00966, Q06203, P08243, P27708, P17174, P00505, P04424, P30566	0.0790199
hsa05169:Epstein-Barr virus infection	21	P43686, P35998, O43242, Q13200, P01892, P48736, Q99460, P62195, P52333, P16885, P17980, Q15008, P30455, P51665, P62333, P30466, O00231, P16070, P30485, P62191, P40763, O00232, P07948	0.0149951		hsa00280:Valine, leucine and isoleucine degradation	17	P24752, Q86V21, P51648, P42765, P26440, Q99714, P09622, P05091, Q9HCC0, P31937, P49189, P30084, Q9BWD1, P40939, P55084, Q16836, P49419	0.00272828		hsa04145:Phagosome	20	P31146, P07437, Q9Y6G9, P27824, P05556, Q71U36, P02786, P51149, P61020, P68371, P21281, P51148, P63000, Q8WTV0, P20339, P38606, Q14204, P68366, P63261, P05534	0.0792405
hsa05203:Viral carcinogenesis	30	P60953, P12931, P01892, Q14160, P48736, O00571, P31946, P61981, P35609, P12814, P52333, P27348, Q7KZF4, P28482, P30455, O43707, P63104, P07948, P62805, Q5T4S7, Q16778, P63000, P62258, P49023, P61586, Q04917, P30466, P01116, P30485, P62191, P40763, Q12959	0.0163321		hsa04512:ECM-receptor interaction	25	P35443, P02751, O00468, P26006, P18084, P06756, P17301, P18564, P07942, P11047, P07996, P98160, P18827, P12110, P05556, P12111, P16144, P05106, P12109, O15230, P56199, P16671, P16070, P23229, Q08722	0.00364716		hsa03013:RNA transport	22	P60228, P68104, O14744, Q14974, Q8IYB3, P46060, Q14152, Q04637, P55884, Q13838, P60842, P23588, Q13347, P11940, Q7L576, O15371, P05198, P62826, O00303, P38919, Q92900, P41091	0.0797018
hsa04062:Chemokine signaling pathway	28	Q92608, P42224, P60953, P12931, P50151, P48736, Q01970, Q02750, P04899, Q8TEW0, Q9UBI6, P52333, P62873, P15153, P28482, Q7LDG7, P63096, P61224, P07948, P08754, P63000, Q92556, Q05397, P63218, P49023, P61586, P01116, P40763	0.0163728		hsa05230:Central carbon metabolism in cancer	20	O15427, Q01813, P18669, P08581, Q02750, Q01650, P17858, P04637, P11166, P27986, Q15758, P08237, P11413, P28482, P14618, P42345, P01116, P36507, P00533, P01111	0.0051955		hsa00630:Glyoxylate and dicarboxylate metabolism	7	P24752, P40926, Q9BWD1, P34897, P09622, O75390, P21399	0.0813764
hsa05120:Epithelial cell signaling in Helicobacter pylori infection	14	P60953, P12931, P08581, O14672, P21281, P63000, Q9Y5K8, P38606, P16885, Q06124, P00533, Q9Y624, P07948, Q07157	0.0183601		hsa01210:2-Oxocarboxylic acid metabolism	9	O75874, P17174, Q03154, P00505, P48735, P50213, Q99798, O75390, P21399	0.00762104		hsa04962:Vasopressin-regulated water reabsorption	9	Q96FJ2, P20339, Q9Y6G9, Q14204, Q14203, P52565, P61020, P62491, P51148	0.0827801
hsa04014:Ras signaling pathway	32	P29317, P60953, P62070, P50151, P08581, P48736, Q02750, P61020, P62158, Q14644, P55196, Q9UBI6, P11233, P11234, P62873, P15153, P16885, Q06124, P28482, P60763, Q7LDG7, P61224, O96013, P51148, P63000, P20339, P63218, P61586, P10301, P62330, P01116, P00533	0.0184072		hsa00270:Cysteine and methionine metabolism	14	P25325, P40925, P40926, P19623, P17174, P31153, P00338, P00505, P07195, P23526, O43865, Q9NZL9, P52788, Q13126	0.00833943		hsa05230:Central carbon metabolism in cancer	11	O15427, P11166, Q01813, Q15758, P18669, P11413, P28482, Q02750, Q01650, P01116, P01111	0.0992225
hsa04151:PI3K-Akt signaling pathway	44	P02751, P29317, P49746, P62714, P08581, P50151, P30153, P48736, Q02750, P62753, P31946, P61981, P26006, P52333, Q9UBI6, P18084, P07900, P27348, P62873, P14625, P06756, P17301, P28482, P07942, P11047, P07996, P63104, Q16543, P12110, P05556, P12111, P16144, P05106, P63000, O15230, P08238, P12109, Q05397, P62258, P63218, Q04917, P01116, P23229, P00533	0.0189039		hsa05412:Arrhythmogenic right ventricular cardiomyopathy (ARVC)	20	P15924, P05556, P60709, P16144, P35221, P14923, P35222, P05106, P26006, P18084, P02545, P06756, P18564, P17301, P56199, Q14126, P63261, P23229, Q99959, P26232	0.00851413		hsa04666:Fc gamma R-mediated phagocytosis	13	Q9BPX5, P50552, P60953, O15145, P28482, P29966, P62330, P59998, Q9Y6W5, Q02750, P23528, P63000, P07948	0.102105
hsa00270:Cysteine and methionine metabolism	10	P25325, P40925, P40926, P19623, P17174, P31153, P00338, P07195, P23526, Q13126	0.0195906		hsa05203:Viral carcinogenesis	45	Q16531, P12931, P60953, Q14160, O00571, P06493, P31946, P61981, P35609, Q13547, P12814, Q7KZF4, P27348, P27986, P62993, P43405, P28482, P30455, O43707, P61978, P22694, P62805, P63104, P07948, P23458, Q14790, Q5T4S7, Q14839, Q16778, Q93009, P63000, P04637, Q07812, P62258, P49023, P61586, Q04206, Q04917, P14618, P05534, P01116, P62191, P40763, P01111, Q12959, Q9Y277	0.00868529		hsa04540:Gap junction	13	P08754, P07437, Q71U36, Q02750, P06493, P68371, P62993, P68366, P28482, P01116, P01111, P29992, Q07157	0.137352
hsa04370:VEGF signaling pathway	13	P60953, P12931, P48736, Q02750, P63000, P49023, Q05397, P15153, P16885, P28482, P60763, P01116, P04792	0.0216361		hsa04919:Thyroid hormone signaling pathway	29	P42224, P12931, P60709, Q02750, Q01970, P35222, P11166, Q13547, P46531, P27986, Q04721, O15530, P06756, P16885, Q15382, P28482, P42345, P36507, P05023, P12644, Q9UM47, P22694, P05026, Q8N3E9, P05106, P04637, P63261, P01116, P01111	0.00897087		hsa00051:Fructose and mannose metabolism	7	P60174, Q01813, P04075, Q00796, P15121, Q8N0W3, Q96IJ6	0.148518
hsa05200:Pathways in cancer	48	P02751, P42224, P60953, P50151, P08581, P48736, Q01970, Q02750, P35221, P35222, P04899, P26006, P11166, Q9UBI6, P07900, P11233, P62873, P11234, Q13363, P12830, P14625, P06756, P17301, P15153, P16885, Q15370, P28482, P60763, P07942, P11047, Q7LDG7, P63096, P29992, P08754, P05556, P14923, P63000, Q14344, O15230, P08238, P06753, Q05397, P63218, P61586, P01116, P23229, P00533, P40763	0.02517		hsa04540:Gap junction	24	Q5JWF2, P08754, P07437, Q71U36, P12931, P50148, Q01970, Q02750, P06493, P68371, P04899, P48730, P62993, P68366, P28482, P01116, P36507, P00533, P63096, P22694, Q9BUF5, P01111, P29992, Q07157	0.00897272		hsa05169:Epstein-Barr virus infection	16	P43686, P35998, Q13200, Q99460, P62195, O00487, P08670, Q15008, P17980, P51665, P62333, P05534, O00231, P62191, O00232, P07948	0.15132
hsa00520:Amino sugar and nucleotide sugar metabolism	11	Q16851, Q16222, Q06210, Q9Y5P6, P36871, O60701, O95394, P06744, O15305, Q8N0W3, P00387	0.02891		hsa04666:Fc gamma R-mediated phagocytosis	23	Q92747, Q9BPX5, P60953, O15144, P08575, O15145, O15143, O15511, Q9Y6W5, Q02750, P49006, P23528, P63000, P27986, P50552, P15153, P16885, P43405, P28482, P29966, P62330, P59998, P07948	0.0104606		hsa04730:Long-term depression	10	P08754, Q14344, P28482, P30153, Q02750, P01116, P10398, P01111, P29992, P07948	0.152027
hsa05146:Amoebiasis	18	P02751, P18206, P48736, Q01970, P35237, P51149, P61020, P35609, P51148, P12814, P20339, O15230, Q05397, P07942, P11047, O43707, P04792, P29992	0.0300408		hsa04961:Endocrine and other factor-regulated calcium reabsorption	15	Q5JWF2, Q9UQ16, P50570, P50148, Q01970, P63010, P62491, Q05193, O94973, Q00610, O95782, P05023, P22694, Q96CW1, P05026	0.012944		hsa00480:Glutathione metabolism	9	P48637, P23921, O75874, P19623, P52788, P11413, P52209, P78417, P28838	0.152819
hsa05212:Pancreatic cancer	13	P11233, P11234, P42224, P60953, P15153, P28482, P60763, P48736, Q02750, P01116, P00533, P40763, P63000	0.033246		hsa04730:Long-term depression	18	Q5JWF2, P08754, P62714, P30153, P50148, Q01970, Q02750, P10398, P04899, P08069, Q14344, P28482, P01116, P63096, P36507, P01111, P29992, P07948	0.0135037		hsa01210:2-Oxocarboxylic acid metabolism	5	O75874, P17174, P00505, O75390, P21399	0.163994
hsa04730:Long-term depression	12	P08754, Q14344, P62714, P28482, P30153, Q01970, Q02750, P01116, P63096, P04899, P29992, P07948	0.0478785		hsa01100:Metabolic pathways	198	O75964, P07741, P43034, O43175, Q8N0W3, O95395, P23526, P07738, P14324, Q11201, P38606, Q11206, P16885, P52788, P00568, Q6XQN6, Q01433, P22695, P00352, P10515, O60701, O60218, P20839, P27144, P23921, P36871, P00558, P27338, Q7Z4W1, Q16836, P78330, Q10471, Q15493, Q16851, Q01813, P11766, P16152, P00492, P00491, P22307, P11216, Q9BZX2, P37837, O75489, P42765, P00338, Q92685, Q13085, P06576, P07814,…	0.0152177		hsa05216:Thyroid cancer	6	P06753, P28482, Q02750, P01116, P35222, P01111	0.270642
hsa04721:Synaptic vesicle cycle	12	Q9Y5K8, Q9UQ16, P61764, P38606, P21579, P46459, P32856, P50570, Q00610, P63010, P21281, P54920	0.06686		hsa00480:Glutathione metabolism	16	P19623, P78417, P22352, P48735, Q9Y2Q3, O75223, P48637, P23921, O75874, O95881, P52788, P52209, P11413, P18283, P28838, P48506	0.0155665		hsa00330:Arginine and proline metabolism	8	Q96KP4, P49189, P19623, P17174, P52788, P00505, P28838, P05091	0.310192
hsa04915:Estrogen signaling pathway	16	P08754, P12931, P48736, Q01970, Q02750, P04899, P62158, P11142, P07900, P14625, P08238, P0DMV8, P28482, P01116, P00533, P63096	0.0731495		hsa05120:Epithelial cell signaling in Helicobacter pylori infection	19	P60953, P12931, P08581, P41240, Q9UI12, O14672, P15313, P21281, P63000, Q93050, P78536, P38606, P16885, Q06124, Q04206, P00533, Q9Y624, P07948, Q07157	0.0178897		hsa04910:Insulin signaling pathway	16	O75955, Q13131, Q14254, P36873, P49327, Q02750, P62753, P10398, P06737, P13861, P62136, P62993, P28482, P11216, P01116, P01111	0.312191
hsa05211:Renal cell carcinoma	12	P11166, P60953, Q15370, O96013, P08581, Q06124, P28482, P48736, Q02750, P01116, P61224, P63000	0.0885322		hsa05213:Endometrial cancer	16	P35221, Q02750, P10398, P35222, P04637, P27986, P12830, O15530, P62993, Q13418, P28482, P01116, P36507, P00533, P01111, P26232	0.018285		hsa05213:Endometrial cancer	8	P62993, Q13418, P28482, Q02750, P01116, P10398, P35222, P01111	0.345274
hsa00970:Aminoacyl-tRNA biosynthesis	12	P26640, P07814, P14868, P49588, P26639, P47897, Q9NSD9, P41252, P41250, P49591, P54136, P23381	0.0885322		hsa01212:Fatty acid metabolism	15	P24752, P49748, Q9NZ01, P42765, P49327, O95573, Q13085, Q9ULC5, Q9BWD1, P30084, P40939, P55084, Q16836, O60488, Q53GQ0	0.0217891		hsa04915:Estrogen signaling pathway	12	P08754, P07900, P11142, P08238, P14625, P62993, Q02790, P0DMV8, P28482, Q02750, P01116, P01111	0.405324
hsa04141:Protein processing in endoplasmic reticulum	23	P17655, P30101, P31689, O60884, P07384, Q9UMX0, O94979, P61077, P07900, P11142, Q99683, Q14697, P14625, P08238, P0DMV8, P07237, P51572, P11021, P05198, Q9Y4L1, P55072, P33908, Q92598	0.092484		hsa00520:Amino sugar and nucleotide sugar metabolism	15	Q16851, Q06210, Q16222, Q9Y5P6, O60701, P06744, O60547, O95394, Q8N0W3, Q96IJ6, P36871, Q9UJ70, O15305, P00387, P51570	0.0217891		hsa04720:Long-term potentiation	9	P36873, P51812, P28482, Q02750, P01116, P10398, P01111, P61224, P62136	0.409457
hsa05412:Arrhythmogenic right ventricular cardiomyopathy (ARVC)	12	P18084, P06756, P05556, P17301, P63261, P16144, P14923, P35221, P23229, P35222, P05106, P26006	0.093924		hsa00250:Alanine, aspartate and glutamate metabolism	12	Q06210, P00966, Q06203, P08243, Q9NQR4, P27708, P17174, P30520, P30038, P00505, P04424, P30566	0.0301394		hsa05120:Epithelial cell signaling in Helicobacter pylori infection	9	P60953, P38606, Q06124, O14672, Q9Y624, P21281, Q07157, P63000, P07948	0.411369
hsa04962:Vasopressin-regulated water reabsorption	9	Q96FJ2, P20339, Q9Y6G9, Q14204, P46459, P52565, P61020, P62491, P51148	0.118885		hsa04015:Rap1 signaling pathway	43	P29317, P12931, P60953, P08581, P60709, Q01970, Q02750, P35222, P04899, Q8TEW0, P62158, P55196, P07737, P41743, P27986, P11234, P12830, P15153, O60716, P28482, Q7LDG7, P63096, P36507, P07996, P46734, P61224, P08754, Q5JWF2, Q9Y490, P05556, P50148, P05106, P63000, Q9BYG5, P08069, P50552, P61586, P63261, P10301, P35080, P01116, P00533, P01111	0.0307635		hsa04961:Endocrine and other factor-regulated calcium reabsorption	7	O94973, Q00610, O95782, P62491, P63010, P05023, Q96CW1	0.412827
hsa00052:Galactose metabolism	7	Q16851, Q01813, P36871, P08237, P15121, O60218, P17858	0.152068		hsa00330:Arginine and proline metabolism	15	P51648, Q96C36, P19623, P17174, P00505, P54886, P05091, P27338, Q96KP4, P49189, P13674, P52788, P30038, P28838, P49419	0.0311393		hsa05223:Non-small cell lung cancer	8	P62993, P28482, Q00534, Q02750, Q9HC35, P01116, P10398, P01111	0.415837
hsa04071:Sphingolipid signaling pathway	17	P08754, P62714, P30153, P48736, Q02750, Q01970, P04899, P63000, Q14344, Q99683, P15153, P33527, P61586, P28482, P60763, P01116, P63096	0.153325		hsa00970:Aminoacyl-tRNA biosynthesis	18	P56192, P49589, P49588, P14868, P47897, P26639, P41252, P54577, P41250, P54136, P26640, Q15046, O43776, P07814, Q9P2J5, Q9NSD9, P49591, P23381	0.0321701
hsa04390:Hippo signaling pathway	20	P62714, P62140, Q14160, Q6P1M3, P30153, P35221, P31946, P35222, P61981, Q9BYG5, Q8TEW0, P62136, P27348, P12830, P62258, P63261, Q04917, Q9H8S9, P63104, Q12959	0.164387		hsa05211:Renal cell carcinoma	18	P60953, O96013, P08581, Q02750, Q13177, P10398, P63000, P11166, P27986, P62993, Q15370, Q06124, P28482, P07954, P01116, P36507, P01111, P61224	0.0321701
hsa04066:HIF-1 signaling pathway	14	P04406, P02786, P06733, P48736, Q02750, P62753, P11166, P13929, Q15370, P16885, P28482, P00533, P40763, Q13557	0.203332		hsa00410:beta-Alanine metabolism	11	Q12882, P51648, Q96KP4, P49189, P19623, P52788, P30084, P40939, Q14117, P49419, P05091	0.0330329
hsa00040:Pentose and glucuronate interconversions	7	Q16851, Q00796, O60701, P15121, Q7Z4W1, P14550, O60218	0.208033		hsa05110:Vibrio cholerae infection	15	P13667, Q5JWF2, P38606, P16885, P55011, P63261, P60709, Q9UI12, Q9UDY2, P22694, P21281, P15313, P61619, Q93050, Q07157	0.0415344
hsa00480:Glutathione metabolism	9	P23921, O75874, P19623, P11413, P52209, P78417, P22352, P19440, P28838	0.22093		hsa04721:Synaptic vesicle cycle	17	Q9UQ16, P46459, P50570, Q9UI12, P63010, P15313, P21281, Q93050, Q05193, P61764, O94973, P38606, Q00610, O95782, P54920, Q96CW1, Q13277	0.0439639
hsa05213:Endometrial cancer	9	P12830, Q13418, P28482, P48736, P35221, Q02750, P01116, P00533, P35222	0.237161		hsa04071:Sphingolipid signaling pathway	27	P63151, P62714, P30153, Q02750, Q01970, P04899, P27986, Q99683, O15530, P15153, P28482, P06241, Q14738, P36507, P63096, P08754, P50148, P63000, P04637, Q14344, Q07812, P33527, P61586, O75116, Q04206, P01116, P01111	0.0467732
hsa00250:Alanine, aspartate and glutamate metabolism	7	Q06210, P00966, P08243, P27708, P17174, P04424, P30566	0.243324		hsa04910:Insulin signaling pathway	30	P36873, P62753, Q02750, P10398, P06737, Q9UPT5, P13861, P62136, P62158, P27986, P10586, P41743, O15530, P62993, P54619, P28482, Q15382, P11216, P42345, P36507, P22694, Q13131, O75955, Q14254, P62140, P49327, Q13085, P01116, P46019, P01111	0.0476123
hsa04722:Neurotrophin signaling pathway	16	P60953, P51812, P52565, P48736, Q02750, P63000, P62158, Q99683, P62258, P16885, P61586, Q06124, P28482, P01116, Q13557, P61224	0.245461		hsa00640:Propanoate metabolism	10	P24752, Q9NR19, Q13085, Q9NUB1, P30084, Q9BWD1, P53597, P40939, P00338, P07195	0.0476177
hsa04114:Oocyte meiosis	15	P62714, P62140, P51812, P30153, Q02750, P31946, P61981, P62158, P62136, P27348, P62258, P28482, Q04917, Q13557, P63104	0.251113		hsa04915:Estrogen signaling pathway	23	P08754, Q5JWF2, P12931, Q02790, P50148, Q01970, Q02750, P04899, P62158, P07900, P11142, P27986, P62993, P14625, P08238, P0DMV8, P28482, P01116, P36507, P00533, P63096, P22694, P01111	0.0575541
hsa04919:Thyroid hormone signaling pathway	15	P42224, P12931, Q8N3E9, P48736, Q01970, Q02750, P35222, P05106, P11166, P06756, P16885, P63261, P28482, P01116, P05023	0.299817		hsa04114:Oocyte meiosis	25	P62714, P36873, Q08209, P30153, Q02750, P31946, P06493, P61981, P62136, P62158, P53350, P27348, P28482, Q13616, Q14738, P22694, P63104, P62140, P51812, Q9H2G2, Q15418, P08069, P62258, Q14683, Q04917	0.059109
hsa05216:Thyroid cancer	6	P12830, P06753, P28482, Q02750, P01116, P35222	0.30001		hsa04720:Long-term potentiation	17	P62140, P36873, P51812, P50148, Q08209, Q01970, Q02750, P10398, P62158, P62136, Q15418, P28482, P01116, P36507, P22694, P01111, P61224	0.0617341
hsa05034:Alcoholism	21	P08754, O75367, P62140, P50151, Q02750, Q16778, Q8IUE6, P04899, Q16777, P62158, P62136, P84243, Q9UBI6, P62873, P63218, P28482, Q7L7L0, P01116, P63096, Q9P0M6, P62805	0.300189		hsa03013:RNA transport	35	P60228, O14744, Q96EE3, Q14974, B5ME19, Q14240, P23588, P47813, Q7L576, Q8N1F7, P62826, O00303, P38919, Q92900, P68104, O75822, Q8IYB3, Q9UHI6, P46060, Q04637, Q14152, P57678, Q9UI10, P55884, P60842, Q5SRE5, Q13347, P11940, O60841, O14980, O15371, Q8NI27, P05198, P78344, P41091	0.0628936
hsa04720:Long-term potentiation	10	P62140, P51812, P28482, Q01970, Q02750, P01116, Q13557, P61224, P62136, P62158	0.302482		hsa05200:Pathways in cancer	69	P42224, Q13043, P50151, P35221, Q01970, P61073, P10398, P84022, P26006, P11166, P27986, P11234, P12830, P62993, P15153, Q15370, P16885, Q7LDG7, P63096, P36507, P22694, P29992, P05556, Q14790, P63000, P04637, P08069, Q14344, P08238, O15230, P06753, Q07812, P61586, Q04206, P02751, Q92888, P60953, P08581, Q02750, P35222, P04899, Q13547, Q9UBI6, P07900, P62873, Q13363, P14625, P17301, P06756, P62879,…	0.078458
hsa04960:Aldosterone-regulated sodium reabsorption	7	Q15599, Q96PU5, P28482, P31947, P48736, P01116, P05023	0.320746		hsa04390:Hippo signaling pathway	31	P63151, P62714, P36873, Q14160, Q92796, P60709, P30153, P35221, P31946, P84022, P35222, P61981, P48730, P62136, Q8TEW0, P27348, P41743, P12830, Q15334, Q9H8S9, P12644, P63104, P62140, Q6P1M3, Q9BYG5, P35240, P62258, P63261, Q04917, P26232, Q12959	0.0814913
hsa00020:Citrate cycle (TCA cycle)	6	P40925, P40926, O75874, P53396, P36957, P21399	0.322928		hsa05169:Epstein-Barr virus infection	26	P35998, P43686, Q13200, O43242, Q99460, P62195, O00487, Q13547, P27986, P16885, P43405, P17980, P30455, P46734, P07948, P23458, Q93009, P04637, Q04206, Q15008, P62333, P05534, P16070, O00231, P62191, P40763, O00232	0.0901898
hsa05410:Hypertrophic cardiomyopathy (HCM)	11	P18084, P06756, P05556, P17301, P06753, P63261, P68032, P16144, P23229, P05106, P26006	0.332273		hsa00630:Glyoxylate and dicarboxylate metabolism	9	P24752, P40925, P40926, Q9BWD1, P34897, Q99798, P09622, O75390, P21399	0.097214
					hsa05212:Pancreatic cancer	16	P42224, P23458, P60953, Q02750, P10398, P84022, P63000, P04637, P27986, P11234, P15153, Q04206, P28482, P01116, P00533, P40763	0.103438
					hsa05146:Amoebiasis	23	Q5JWF2, P02751, P30740, P18206, P50148, Q01970, P35237, P51149, P61020, P35609, P51148, P12814, P27986, P20339, O15230, Q05397, Q04206, P07942, P11047, O43707, P04792, P22694, P29992	0.1039
					hsa05410:Hypertrophic cardiomyopathy (HCM)	18	Q13131, P05556, P60709, P16144, P05106, P26006, P18084, P09493, P02545, P06756, P17301, P18564, P06753, P56199, P54619, P63261, P67936, P23229	0.118118
					hsa04962:Vasopressin-regulated water reabsorption	12	Q5JWF2, Q12846, P20339, Q9Y6G9, Q14204, P46459, P52565, P52566, P61020, P62491, P22694, P51148	0.118492
					hsa04370:VEGF signaling pathway	15	P60953, P12931, Q08209, Q02750, P63000, P27986, P15153, P49023, Q05397, P16885, P28482, P01116, P36507, P04792, P01111	0.12023
					hsa04151:PI3K-Akt signaling pathway	60	P63151, P62714, P50151, P30153, P62753, P31946, P26006, P18084, P27986, P62993, P18564, O15530, Q15382, P36507, P05556, P12111, P05106, P63000, P04637, P08069, P08238, O15230, P62258, P56199, Q04206, P35443, P02751, P29317, P08581, Q02750, P61981, P23588, Q9UBI6, P27348, P07900, P62873, P14625, P17301, P06756, P62879, P43405, P28482, Q14738, P07942, P11047, P42345, P07996, P63104, Q13131, P23458,…	0.121848
					hsa05223:Non-small cell lung cancer	14	P04637, P27986, Q13043, O15530, P62993, P16885, P28482, Q02750, Q9HC35, P01116, P10398, P36507, P00533, P01111	0.125449
					hsa05020:Prion diseases	10	P46531, Q07812, P28482, P06241, P31948, P11021, P11047, Q02750, P36507, P22694	0.125587
					hsa05216:Thyroid cancer	9	P04637, P12830, P06753, P28482, Q02750, P01116, P36507, P35222, P01111	0.127206
					hsa00062:Fatty acid elongation	8	Q9NZ01, P42765, P30084, P40939, P55084, Q16836, O00154, Q53GQ0	0.151907
					hsa04014:Ras signaling pathway	41	P29317, Q13043, P60953, P62070, P50151, P08581, Q02750, P61020, Q14644, P62158, P55196, Q9UBI6, P27986, P11234, P62873, P62993, P15153, P62879, P16885, Q9UJF2, Q06124, P28482, Q7LDG7, P36507, P22694, P61224, P20936, O96013, Q13177, P51148, P63000, P08069, P20339, P61586, Q04206, P62330, P10301, P21359, P01116, P00533, P01111	0.153222
					hsa05219:Bladder cancer	11	P04637, P12830, P12931, P28482, Q02750, P01116, P10398, P07996, P36507, P00533, P01111	0.154828
					hsa01220:Degradation of aromatic compounds	3	Q15493, P14550, P11766	0.171631
					hsa04722:Neurotrophin signaling pathway	24	P60953, P51812, P52565, P52566, Q02750, P62158, P63000, P04637, Q15418, P27986, Q99683, O15530, P62993, Q07812, P62258, P16885, P61586, Q06124, Q04206, P28482, P01116, P36507, P01111, P61224	0.173484
					hsa05414:Dilated cardiomyopathy	18	Q5JWF2, P05556, P60709, P16144, P05106, P26006, P18084, P09493, P02545, P06756, P17301, P18564, P06753, P56199, P63261, P67936, P23229, P22694	0.18543
					hsa04320:Dorso-ventral axis formation	8	P46531, Q04721, P62993, P28482, Q02750, P01116, P00533, Q9UM47	0.205368
					hsa04664:Fc epsilon RI signaling pathway	15	P27986, O15530, P62993, P15153, P16885, P43405, P28482, P06241, Q02750, P01116, P36507, P46734, P01111, P63000, P07948	0.22045
					hsa05215:Prostate cancer	18	Q02750, P10398, P35222, P04637, P08069, P27986, P07900, O15530, P62993, P14625, P08238, Q04206, P28482, P42345, P01116, P36507, P00533, P01111	0.249744
					hsa00380:Tryptophan metabolism	10	P24752, P51648, P49189, P27338, P30084, Q9BWD1, P40939, Q16836, P49419, P05091	0.254406
					hsa00310:Lysine degradation	12	P24752, P51648, P49189, P30084, Q9BWD1, P40939, P36957, Q16836, Q8NBJ5, P49419, O60568, P05091	0.258506
					hsa00061:Fatty acid biosynthesis	5	Q13085, Q9ULC5, O95573, P49327, O60488	0.262046
					hsa05214:Glioma	14	P04637, P08069, P27986, P62993, P16885, P28482, Q02750, P01116, P10398, P42345, P36507, P00533, P01111, P62158	0.275287

## Sheet: Whole cells & small-EVs
Figure 3 Whole cell and Small-EV KEGG analysis
Benjamini-Hochberg corrected p-values
HCT116 Shared Proteins 676					HT29 Shared Proteins 1323					SW620 Shared Proteins 720
Term:	Gene Count:	Gene Uniprot ID	Benjamini Value:		Term:	Gene Count:	Gene Uniprot ID	Benjamini Value:		Term:	Gene Count:	Gene Uniprot ID	Benjamini Value:
hsa03010:Ribosome	43	P36578, P18124, P46776, P46777, P35268, P46778, P46779, Q07020, P62753, P27635, P61353, P08865, P30050, P62280, P62249, P62424, P62269, P84098, P61247, P62906, P62266, P62241, P62829, P61313, P62263, P23396, P62851, P62701, P46781, P15880, Q02543, P49207, P05388, P83731, P62913, P62917, Q02878, P50914, P40429, Q9Y3U8, P26373, P39023, P62847	1.81799e-15		hsa01130:Biosynthesis of antibiotics	81	P24752, Q06210, Q16222, P04406, P17174, P53597, P06733, Q99714, O95394, P48735, O43175, P29401, P17858, P14324, P00568, P53396, Q01433, P36957, P49419, P40925, P40926, Q96C36, P18669, P10515, P06744, P09972, P27144, P36871, P49189, P00558, P08237, P11413, P52209, O15067, P49247, P14550, Q16836, P78330, Q16851, Q9UIJ7, Q01813, P04075, Q03154, P00505, P04424, P11766, P09622, P05091, P30566, P31040,…	1.63442e-20		hsa03010:Ribosome	56	P36578, P62750, P62277, Q07020, P62753, P27635, P08865, P61353, P32969, P62280, P62899, P18621, P62424, P62269, P61247, P62266, P62829, P61313, P62263, P23396, P62851, P15880, Q02543, P49207, P39019, P61254, P62917, Q02878, P39023, P18124, P46776, P46777, P46778, P35268, P46779, P63173, P30050, P62249, P84098, P62906, P62241, P62244, P46782, P62701, P46781, P60866, P46783, P05387, P42766, P05388,…	3.68322e-26
hsa03050:Proteasome	25	P43686, P35998, P25788, O43242, Q13200, P25789, P25786, P25787, Q99460, Q99436, P62195, P28072, P28070, O14818, Q15008, P17980, P62333, P51665, P60900, P49721, O00231, P49720, P62191, P28066, O00232	2.82222e-15		hsa03010:Ribosome	63	P36578, P62750, P62277, Q07020, P62753, P27635, P08865, P32969, P62280, P18621, P62424, P62269, P62266, P61247, Q7Z2W9, P62829, P47914, P63220, P61313, P62263, P23396, P62851, P15880, Q02543, P39019, P62913, P61254, P62917, Q02878, P49406, P39023, P18124, P46776, P46777, P46778, P35268, P46779, P30050, P63173, P62249, Q9BYD6, P84098, P62906, P62241, P62244, P46782, P62701, P46781, P60866, P05387,…	2.13062e-20		hsa03050:Proteasome	22	P43686, P35998, P25788, Q13200, P25789, P25786, P25787, Q99460, O00487, P62195, Q99436, P28072, P28070, Q15008, P17980, P51665, P62333, O00231, P49721, P62191, O00232, P28066	3.33706e-11
hsa04810:Regulation of actin cytoskeleton	48	P46940, P18206, P12931, P60953, P62070, Q9UQB8, Q9Y6W5, Q02750, P23528, P26006, P62136, P12814, Q9UBI6, P07737, P18084, P15311, P17301, P06756, P15153, Q7L576, P28482, P60763, P59998, O43707, Q86VI3, P62140, P05556, Q9Y281, O15145, O96013, P26038, O15143, P16144, P63000, O14950, Q14344, P35241, Q05397, P49023, P61586, P63261, Q9Y2A7, P10301, P35080, P01116, P23229, P00533, Q8N8S7	7.47102e-12		hsa01200:Carbon metabolism	47	P24752, P04406, Q01813, P17174, P53597, P04075, P06733, P00505, P48735, P09622, P11766, O43175, P29401, P17858, P31040, O95336, P13929, Q9BWD1, P36957, P11498, P40925, P60174, P37837, P40926, Q9Y617, P18669, Q9NUB1, P10515, P34897, P06744, P09972, P08237, P60891, P00558, O75874, P11413, P52209, P30084, P40939, P49247, P14618, P07954, P50213, Q99798, O75390, P78330, P21399	6.7446e-13		hsa01130:Biosynthesis of antibiotics	47	Q16851, P24752, P04406, Q01813, P17174, P04075, P06733, P00505, P04424, P09622, O43175, P29401, P05091, P30566, P54819, P22392, O95336, P22102, P13929, Q9BWD1, Q96I99, P53396, P36957, P60174, P37837, P40926, Q9Y617, P00966, Q06203, P18669, P00338, P34897, P06744, P31939, P07195, P22234, P36871, P00558, P49189, O75874, P11413, O15067, P52209, P07954, O75390, P78330, P21399	3.83955e-10
hsa01130:Biosynthesis of antibiotics	46	Q16851, Q16222, Q06210, P04406, Q01813, P17174, P04075, P06733, O95394, P04424, O43175, P29401, P17858, P30566, P22392, P22102, O95336, P13929, P53396, Q01433, P36957, P40925, P60174, Q53H96, P37837, P40926, Q9Y617, P00966, Q9NPH2, P18669, P00338, P06744, P31939, P07195, O43252, P22234, P36871, P08237, P00558, P49189, O75874, P11413, O15067, P52209, P14550, P21399	1.43047e-10		hsa03050:Proteasome	28	P35998, P43686, P25788, Q13200, O43242, P25789, P25786, P25787, Q14997, Q99460, O00487, P62195, Q99436, P20618, P17980, P28066, P28074, P28072, P28070, O14818, Q15008, P62333, P60900, O00231, P49721, P62191, P49720, O00232	6.99218e-13		hsa04520:Adherens junction	25	P46940, P19784, P18206, P60953, P60709, Q9UQB8, P67870, Q9Y6W5, P35221, P68400, P35222, P12814, P55196, P29350, P12830, O60716, P28482, P06241, O43707, P07947, Q07157, Q8WWI1, P63000, P61586, P63261	2.79286e-09
hsa05100:Bacterial invasion of epithelial cells	26	P18206, Q9UHD8, P60953, P12931, P08581, Q9NVA2, Q9Y6W5, P35221, Q9Y5K6, P35222, P12830, P84095, Q00610, P59998, P05556, O15145, O15143, P50570, Q15019, P63000, P49023, Q05397, P61586, Q13418, P63261, Q92599	9.06107e-10		hsa01230:Biosynthesis of amino acids	36	P04406, Q01813, P31153, P17174, P04075, P06733, Q03154, P00505, P48735, P04424, O43175, P29401, P17858, P13929, P11498, P60174, P37837, Q9Y617, P00966, P18669, Q96C36, P34897, P54886, P09972, Q9NZL9, P08237, P60891, P00558, O75874, P49247, P50213, P14618, Q99798, O75390, P78330, P21399	1.10689e-12		hsa01200:Carbon metabolism	30	P24752, P04406, Q01813, P17174, P06733, P04075, P00505, O43175, P09622, P29401, O95336, P13929, Q9BWD1, Q96I99, P36957, P60174, P37837, P40926, Q9Y617, P18669, P34897, P06744, P00558, O75874, P52209, P11413, P07954, O75390, P78330, P21399	3.86456e-08
hsa04144:Endocytosis	47	Q99816, Q96QK1, P61204, P12931, Q9HAU4, P60953, P61026, Q15286, P61006, Q9H444, P63010, Q9NZN4, Q86VN1, Q9H4M9, O14964, Q9H223, P33176, P11142, Q96EY5, Q00610, P59998, Q96J02, Q9UK41, P53990, Q9NP79, P02786, O15145, O15143, P50570, Q9H9H4, P51149, P62491, Q9UN37, P51148, Q99961, P20339, P20338, P47755, P47756, Q96PU5, P0DMV8, Q9BY43, P61586, P62330, Q9BRG1, Q96H20, P00533	2.65517e-09		hsa04144:Endocytosis	70	Q99816, Q96QK1, P61204, Q9NR46, P12931, O75351, Q15286, P61006, Q9H444, Q8N6H7, P63010, Q86VN1, Q9H4M9, P11142, Q96B97, P59998, Q96J02, P25098, Q9BPX5, P02786, P50570, Q9Y5X3, Q9H9H4, P62491, Q9UBC2, Q9BYG5, P40818, P08069, P47755, P47756, Q96PU5, Q9BY43, P61586, Q9BRG1, O95782, Q96CW1, Q92747, Q13596, P60953, P61026, Q9NZN4, P61020, O75436, O14964, Q9H223, P33176, P52907, Q05193, P41743, O94973,…	6.83895e-11		hsa01230:Biosynthesis of amino acids	23	P60174, P04406, P37837, Q01813, P00966, Q9Y617, P18669, P31153, P17174, P06733, P04075, P34897, P00505, P04424, O43175, P29401, Q9NZL9, P13929, O75874, P00558, O75390, P78330, P21399	1.08572e-07
hsa04520:Adherens junction	24	P46940, P18206, P60953, P12931, P08581, Q9UQB8, P67870, P35221, Q9Y6W5, P68400, P35222, P63000, P12814, P55196, P12830, P15153, O60716, P61586, P28482, P63261, P60763, O43707, P00533, Q07157	3.31452e-09		hsa04810:Regulation of actin cytoskeleton	63	P46940, Q9NYB9, O60610, P12931, P62070, P60709, Q9Y6W5, P10398, P23528, P62136, P26006, P18084, P07737, P27986, P15311, P18564, P15153, P59998, O43707, P36507, Q9BPX5, P05556, P62140, P26038, P63000, O14950, Q14344, P61586, Q92747, Q92888, P18206, P60953, P36873, Q9UQB8, Q02750, P12814, Q9UBI6, P06756, P17301, Q7L576, P28482, Q9NRY4, Q86VI3, O15144, O15145, O96013, O15143, P16144, Q13177, P35241,…	1.96857e-10		hsa05130:Pathogenic Escherichia coli infection	19	P07437, Q9BPX5, Q92974, P60953, Q71U36, P05556, O15145, P60709, P35222, P68371, P12830, P15311, P68366, P61586, P63261, P06241, P59998, P19338, Q14247	2.0275e-07
hsa04510:Focal adhesion	40	P17655, P18206, P12931, P60953, P08581, Q02750, P35222, P26006, P62136, P12814, P18084, P17301, P06756, P15153, P28482, P60763, P07942, P11047, O43707, P61224, Q9Y490, P62140, P05556, O96013, P21333, P16144, O75369, P63000, O14950, Q14315, P50552, O15230, P12109, Q05397, P49023, Q13418, P61586, P63261, P23229, P00533	7.88091e-08		hsa05100:Bacterial invasion of epithelial cells	34	Q92747, P18206, P12931, Q9UHD8, P60953, P08581, Q9NVA2, P60709, Q9Y6W5, P35221, Q9Y5K6, P35222, Q05193, P27986, P12830, P84095, Q00610, P59998, Q9BPX5, O15144, P05556, O15145, O15143, P50570, Q15019, P63000, Q05397, P49023, Q13418, P61586, P63261, Q92599, P26232, Q14247	4.91908e-10		hsa04144:Endocytosis	44	Q99816, Q96QK1, Q9Y3E7, O75351, P60953, P61026, Q15286, P61006, Q9H444, P61020, P63010, Q86VN1, Q9H4M9, Q9H223, P33176, P52907, P11142, Q96EY5, O94973, Q00610, P59998, P25098, Q9UK41, P53990, Q9NP79, Q9BPX5, P02786, O15145, Q8WUM4, P51149, P62491, Q9UBC2, Q9UN37, P51148, P20339, P47756, P0DMV8, Q9BY43, P61586, P62330, Q9BRG1, O95782, P05534, Q96CW1	4.70141e-07
hsa05130:Pathogenic Escherichia coli infection	18	Q13509, P04350, P07437, P60953, Q71U36, P05556, O15145, O15143, P35222, P68371, P12830, P15311, P68366, P61586, P63261, P59998, Q13885, Q9BUF5	4.66327e-07		hsa04520:Adherens junction	31	P46940, P19784, P18206, Q92692, P12931, P60953, P08581, P60709, Q9UQB8, P67870, Q9Y6W5, P35221, P68400, P35222, P12814, P55196, P10586, P12830, P15153, O60716, P28482, O43707, P07947, Q07157, Q8WWI1, P63000, P08069, P61586, P63261, P00533, P26232	3.88967e-09		hsa05100:Bacterial invasion of epithelial cells	22	Q9BPX5, P18206, P60953, P05556, Q9UHD8, O15145, P60709, Q15019, P35221, Q9Y6W5, Q9Y5K6, P35222, P63000, P12830, P49023, P61586, Q13418, P63261, Q00610, P59998, Q92599, Q14247	1.99426e-06
hsa01230:Biosynthesis of amino acids	21	P60174, Q53H96, P04406, P37837, P00966, Q9Y617, Q01813, P18669, P17174, P31153, P06733, P04075, P04424, O43175, P29401, P17858, P13929, O75874, P00558, P08237, P21399	7.76899e-07		hsa00020:Citrate cycle (TCA cycle)	16	P11498, P31040, P40925, P40926, O75874, P53597, P10515, P53396, P48735, P50213, P07954, Q99798, P36957, P09622, O75390, P21399	9.98416e-06		hsa04810:Regulation of actin cytoskeleton	38	P46940, P18206, O60610, P60953, P36873, P62070, P60709, Q9UQB8, Q9Y6W5, Q02750, P10398, P23528, P62136, P12814, P07737, P15311, P17301, Q7L576, P28482, P59998, O43707, Q9BPX5, Q86VI3, P05556, O15145, P26038, P16144, P63000, O14950, Q14344, P35241, P49023, P61586, P63261, Q9Y2A7, P01116, P23229, P01111	5.55997e-06
hsa04670:Leukocyte transendothelial migration	26	P18206, P60953, P35221, P35222, P04899, P55196, P12814, P15311, P15153, P16885, O60716, Q06124, O43707, P63096, P61224, P08754, P05556, P26038, O14950, P63000, P50552, P49023, Q05397, P61586, P63261, Q9Y624	2.87099e-06		hsa00010:Glycolysis / Gluconeogenesis	25	P04406, Q01813, P06733, P04075, P11766, P09622, P17858, P05091, P13929, P49419, P51648, P60174, Q9NUB1, P18669, P00338, P10515, P06744, P07195, P09972, P36871, P49189, P00558, P08237, P14550, P14618	1.07853e-05		hsa04670:Leukocyte transendothelial migration	22	P08754, P18206, P60953, P05556, P26038, P60709, P35221, P35222, P63000, O14950, P12814, P55196, P15311, P50552, P49023, O60716, P61586, Q06124, P63261, O43707, Q9Y624, P61224	0.00127566
hsa05205:Proteoglycans in cancer	34	P46940, P12931, P60953, P62070, P08581, P62753, Q02750, P35222, P62136, P18084, P15311, P06756, P17301, P16885, Q06124, P28482, P62140, P05556, P26038, P21333, O75369, P63000, Q14315, P35241, Q05397, P49023, P61586, P63261, P10301, P01116, P16070, P00533, Q13557, P40763	2.60983e-05		hsa05131:Shigellosis	24	Q92747, Q9BPX5, P18206, P60953, P05556, O60610, O15144, P12931, O15145, O15143, P60709, Q9Y6W5, Q01081, P63000, P07737, P84095, O75116, P63261, Q04206, P28482, P59998, P35080, P16070, Q14247	1.46684e-05		hsa05205:Proteoglycans in cancer	31	P46940, P36873, P60953, P62070, P60709, P62753, Q02750, P10398, P35222, P62136, P23588, P15311, P29350, P62993, P17301, Q06124, P28482, P98160, P05556, P26038, P21333, P17844, O75369, P63000, P35241, P49023, P61586, P63261, P01116, P01111, Q14247	0.00168062
hsa01200:Carbon metabolism	24	P40925, P60174, P04406, P37837, P40926, Q01813, Q9Y617, P18669, P17174, P06733, P04075, P06744, O43175, P29401, P17858, O95336, P13929, O75874, P00558, P08237, P52209, P11413, P36957, P21399	2.67008e-05		hsa00620:Pyruvate metabolism	18	P11498, P24752, P40925, P51648, P40926, Q9NUB1, P10515, P00338, Q04760, P07195, P09622, P05091, Q13085, P49189, Q9BWD1, P07954, P14618, P49419	2.62527e-05		hsa04530:Tight junction	18	P63151, P60953, Q6P1M3, P51153, P60709, P30153, Q9UDY2, P35579, O14950, P55196, P12814, P35580, P61586, P63261, O43707, Q9Y624, Q07157, Q14247	0.00230204
hsa00030:Pentose phosphate pathway	11	P37837, Q01813, P36871, O95336, P08237, P11413, P52209, P04075, P06744, P29401, P17858	0.000200594		hsa04141:Protein processing in endoplasmic reticulum	43	P17655, Q07065, P31689, Q12907, P39656, P27797, P25685, Q9UMX0, P13667, P07900, P11142, P14625, O95757, Q13616, P04843, P51572, P11021, P55072, P51571, P04844, P30101, P27824, Q8NBS9, Q99442, O60884, P07384, P30040, P61619, P46977, P54727, Q15436, Q15084, Q9NYU2, P14314, P08238, Q14697, Q07812, P0DMV8, Q13724, P07237, P05198, Q9Y4L1, Q92598	5.30635e-05		hsa03040:Spliceosome	23	P84103, P52272, P26368, O75643, Q13247, P17844, Q15029, Q13838, Q07955, P11142, P07910, O43143, Q16629, P62318, P0DMV8, Q15393, Q6P2Q9, P38919, Q00839, P61978, P09651, Q15365, Q01130	0.00309326
hsa04540:Gap junction	19	P08754, Q13509, P04350, P07437, P12931, Q71U36, Q01970, Q02750, P68371, P04899, P68366, P28482, Q13885, P01116, P00533, P63096, Q9BUF5, P29992, Q07157	0.000302945		hsa05130:Pathogenic Escherichia coli infection	20	Q92747, P07437, Q9BPX5, Q92974, P60953, O15144, P05556, O15145, O15143, P60709, P35222, P68371, P12830, P15311, P68366, P61586, O75116, P63261, P59998, Q14247	5.93902e-05		hsa00970:Aminoacyl-tRNA biosynthesis	15	P26640, P56192, O43776, Q15046, P07814, P49588, P14868, Q9NSD9, P26639, P47897, P41252, P41250, P54577, P54136, P23381	0.00318678
hsa04145:Phagosome	26	P07437, P31146, P04350, Q13509, Q9Y6G9, O15400, Q71U36, P05556, P02786, P51149, P21281, O14964, P68371, P51148, P63000, Q8WTV0, P18084, P20339, P17301, P06756, P38606, Q14204, P68366, P63261, Q13885, Q9BUF5	0.000324742		hsa04510:Focal adhesion	49	P17655, O60610, P12931, P60709, P26006, P62136, P18084, P27986, P18564, O15530, P62993, P15153, O43707, P05556, P62140, Q9Y490, P21333, O75369, P63000, O14950, P08069, O15230, P61586, Q13418, P18206, P36873, P60953, P08581, Q02750, P35222, P12814, P17301, P06756, P28482, P07942, P11047, Q9NRY4, P61224, O96013, P16144, Q13177, Q15942, P50552, P49023, Q05397, O75116, P63261, P23229, P00533	6.13726e-05		hsa00010:Glycolysis / Gluconeogenesis	15	P60174, P04406, Q01813, P18669, P00338, P04075, P06733, P06744, P07195, P09622, P05091, P36871, P13929, P00558, P49189	0.00353303
hsa05132:Salmonella infection	18	Q9Y6G9, P60953, O15145, O15143, P21333, Q9Y6W5, P51149, O75369, P63000, Q14315, P07737, P84095, Q14204, P63261, P28482, P59998, P35080, Q07157	0.00042235		hsa05205:Proteoglycans in cancer	48	P46940, Q92888, P12931, P60953, P36873, P62070, P08581, P60709, P62753, Q02750, P10398, P35222, P62136, P23588, P18084, P27986, P15311, P62993, P17301, P06756, O15530, Q06124, P28482, P42345, P36507, P98160, P62140, P05556, P26038, P21333, P17844, O75369, P63000, P04637, P08069, P35241, Q05397, P49023, P61586, O75116, P63261, P10301, P01116, P16070, P00533, P40763, P01111, Q14247	6.41801e-05		hsa00270:Cysteine and methionine metabolism	11	O43865, P40926, Q9NZL9, P19623, P17174, P52788, P31153, P00338, P00505, P07195, P23526	0.00365964
hsa00010:Glycolysis / Gluconeogenesis	16	P60174, P04406, Q01813, P18669, P00338, P04075, P06733, P06744, P07195, P17858, P36871, P13929, P00558, P08237, P49189, P14550	0.000434737		hsa03040:Spliceosome	36	P84103, Q12874, Q7L014, Q9UMS4, O75533, P62306, Q15029, Q01081, P14678, P11142, Q16629, P62995, Q6P2Q9, P38919, Q00839, P61978, P09651, P52272, O94906, P26368, O75643, Q13247, P17844, Q07955, P62314, P62316, O43143, P62318, P0DMV8, Q8NI27, Q15393, Q15365, O43447, Q01130, P09661, P38159	7.12182e-05		hsa04510:Focal adhesion	30	P18206, P36873, P60953, O60610, P60709, Q02750, P35222, P62136, P12814, P17301, P62993, P28482, P06241, O43707, P61224, Q9Y490, P05556, P21333, P16144, Q15942, O75369, P63000, O14950, P50552, P12109, P49023, P61586, Q13418, P63261, P23229	0.00450688
hsa05131:Shigellosis	15	P18206, P60953, P12931, P05556, O15145, O15143, Q9Y6W5, P63000, P07737, P84095, P63261, P28482, P35080, P59998, P16070	0.000890746		hsa00030:Pentose phosphate pathway	14	P37837, Q01813, P04075, P06744, P29401, P17858, P09972, P36871, O95336, P60891, P08237, P52209, P11413, P49247	0.000160926		hsa05131:Shigellosis	14	Q9BPX5, P18206, P60953, O60610, P05556, O15145, P60709, Q9Y6W5, P63000, P07737, P63261, P28482, P59998, Q14247	0.00660975
hsa04015:Rap1 signaling pathway	31	P29317, P60953, P12931, P08581, Q01970, Q02750, P35222, P04899, P62158, P55196, P07737, P11233, P12830, P15153, O60716, P28482, P60763, P63096, P61224, P08754, Q9Y490, P05556, P63000, P50552, P61586, P63261, Q9BZL6, P10301, P35080, P01116, P00533	0.000899343		hsa00071:Fatty acid degradation	17	P24752, P49748, P51648, P42126, P42765, O95573, P11766, P05091, Q9ULC5, P49189, P30084, Q9BWD1, P40939, P55084, Q16836, O60488, P49419	0.000190909		hsa00030:Pentose phosphate pathway	9	P37837, Q01813, P36871, O95336, P11413, P52209, P04075, P06744, P29401	0.00875568
hsa00051:Fructose and mannose metabolism	10	P60174, Q9Y5P6, Q01813, P08237, P04075, Q00796, P15121, O15305, Q8N0W3, P17858	0.00222807		hsa05132:Salmonella infection	25	Q92747, Q9Y6G9, P60953, P60709, Q9Y6W5, P07737, P84095, P28482, P59998, Q07157, Q9BPX5, O15144, O15145, O15143, P21333, Q9NSK0, P51149, O75369, P63000, Q14204, Q04206, P63261, O75116, P35080, Q16513	0.000342678		hsa05132:Salmonella infection	16	Q9Y6G9, Q9BPX5, P60953, O15145, P60709, P21333, Q9Y6W5, P51149, O75369, P63000, P07737, Q14204, P63261, P28482, P59998, Q07157	0.00888244
hsa05230:Central carbon metabolism in cancer	14	O15427, Q01813, P18669, P08581, Q02750, Q01650, P17858, P11166, Q15758, P08237, P11413, P28482, P01116, P00533	0.00320702		hsa04670:Leukocyte transendothelial migration	31	P18206, P60953, P60709, P35221, P35222, P04899, P12814, P55196, P27986, P15311, P15153, O60716, Q06124, Q9NRY4, O43707, P63096, Q96AP7, P61224, P08754, P05556, P26038, P63000, O14950, P50552, Q05397, P49023, P61586, P63261, O75116, Q9Y624, P26232	0.000347079		hsa00020:Citrate cycle (TCA cycle)	9	P40926, O75874, Q96I99, P53396, P07954, P36957, P09622, O75390, P21399	0.0106832
hsa04360:Axon guidance	21	P08754, P29317, P60953, P05556, Q9Y281, O96013, P08581, O15031, P23528, P04899, P63000, Q16555, O75044, P15153, Q05397, P61586, P28482, P60763, P01116, P63096, P29323	0.00329728		hsa00280:Valine, leucine and isoleucine degradation	17	P24752, Q86V21, P51648, P42765, P26440, Q99714, P09622, P05091, Q9HCC0, P31937, P49189, P30084, Q9BWD1, P40939, P55084, Q16836, P49419	0.000833454		hsa05203:Viral carcinogenesis	28	P60953, Q14160, O00571, P31946, P06493, P61981, P12814, Q7KZF4, P62993, P28482, Q00534, O43707, P61978, P63104, P07948, P62805, Q5T4S7, P63000, P62258, P49023, P61586, Q04917, P05534, P01116, P62191, P01111, Q9Y277, Q12959	0.0157016
hsa00270:Cysteine and methionine metabolism	10	P25325, P40925, P40926, P19623, P17174, P31153, P00338, P07195, P23526, Q13126	0.00784885		hsa05230:Central carbon metabolism in cancer	20	O15427, Q01813, P18669, P08581, Q02750, Q01650, P17858, P04637, P11166, P27986, Q15758, P08237, P11413, P28482, P14618, P42345, P01116, P36507, P00533, P01111	0.00143637		hsa00620:Pyruvate metabolism	10	P24752, P40926, P49189, Q9BWD1, P00338, Q04760, P07954, P07195, P09622, P05091	0.0177298
hsa00520:Amino sugar and nucleotide sugar metabolism	11	Q16851, Q16222, Q06210, Q9Y5P6, P36871, O60701, O95394, P06744, O15305, Q8N0W3, P00387	0.0113703		hsa01100:Metabolic pathways	187	P24752, P04406, O75964, P19623, P31153, P53597, P12268, P07741, Q99714, P49915, Q15102, P43034, O43175, Q8N0W3, O95395, P23526, P17858, Q11201, P14324, P38606, P09417, P52788, Q6XQN6, P00568, P53396, Q01433, P49419, P22695, P04183, P00352, P18669, P10515, O60701, O60218, P20839, P23921, P27144, O00764, P36871, P08237, P27338, P00558, Q7Z4W1, Q16836, O60488, P78330, Q10471, Q16851, P51659, Q01813,…	0.00171404		hsa04141:Protein processing in endoplasmic reticulum	24	P30101, P27824, Q12907, P39656, P25685, O60884, P07384, P30040, O94979, P13667, Q15084, P07900, P11142, Q14697, P14625, P08238, P0DMV8, P07237, P04843, P11021, P05198, Q9Y4L1, P55072, Q92598	0.0206168
hsa04666:Fc gamma R-mediated phagocytosis	15	P50552, P60953, P15153, Q9Y281, O15145, P16885, O15143, P28482, P62330, P59998, Q02750, Q9Y6W5, P23528, P63000, P07948	0.012951		hsa00051:Fructose and mannose metabolism	13	Q9Y5P6, P60174, Q01813, P04075, Q00796, O60218, O60547, Q8N0W3, Q96IJ6, P17858, P09972, P08237, O15305	0.00208798		hsa04145:Phagosome	22	P31146, P07437, Q9Y6G9, P27824, P05556, Q71U36, P02786, P60709, P51149, P61020, P68371, P21281, P51148, P63000, Q8WTV0, P20339, P17301, P68366, P38606, Q14204, P63261, P05534	0.0215073
hsa05120:Epithelial cell signaling in Helicobacter pylori infection	13	P60953, P12931, P08581, O14672, P21281, P63000, P38606, P16885, Q06124, P00533, Q9Y624, P07948, Q07157	0.0142805		hsa00270:Cysteine and methionine metabolism	14	P25325, P40925, P40926, P19623, P17174, P31153, P00338, P00505, P07195, P23526, O43865, Q9NZL9, P52788, Q13126	0.00318022		hsa05211:Renal cell carcinoma	12	P11166, P60953, P62993, Q06124, P28482, P07954, Q02750, P01116, P10398, P01111, P61224, P63000	0.060682
hsa04530:Tight junction	15	P60953, P12931, Q6P1M3, P51153, P30153, P35579, O14950, P55196, P12814, P35580, P61586, P63261, O43707, Q9Y624, Q07157	0.016975		hsa01210:2-Oxocarboxylic acid metabolism	9	O75874, P17174, Q03154, P00505, P48735, P50213, Q99798, O75390, P21399	0.0037671		hsa03013:RNA transport	22	P60228, P68104, O14744, Q14974, Q8IYB3, P46060, Q14152, Q04637, P55884, Q13838, P60842, P23588, Q13347, P11940, Q7L576, O15371, P05198, P62826, O00303, P38919, Q92900, P41091	0.086255
hsa04370:VEGF signaling pathway	12	P60953, P12931, P15153, Q05397, P49023, P16885, P28482, P60763, Q02750, P01116, P04792, P63000	0.0194381		hsa04530:Tight junction	23	P63151, P60953, P12931, Q6P1M3, P51153, O95049, P60709, P30153, Q9UDY2, P35579, O14950, Q9BYG5, P12814, P55196, P35580, P41743, Q7Z406, P61586, P63261, O43707, Q9Y624, Q07157, Q14247	0.00463882		hsa00250:Alanine, aspartate and glutamate metabolism	8	P00966, Q06203, P08243, P27708, P17174, P00505, P04424, P30566	0.0864744
hsa04611:Platelet activation	19	P08754, Q9Y490, P05556, P62140, P12931, Q01970, P04899, P62136, O14950, Q14344, P50552, P17301, P16885, P61586, P28482, P63261, P63096, P07948, P61224	0.0223617		hsa05213:Endometrial cancer	16	P35221, Q02750, P10398, P35222, P04637, P27986, P12830, O15530, P62993, Q13418, P28482, P01116, P36507, P00533, P01111, P26232	0.00806027		hsa04962:Vasopressin-regulated water reabsorption	9	Q96FJ2, P20339, Q9Y6G9, Q14204, Q14203, P52565, P61020, P62491, P51148	0.0885173
hsa05200:Pathways in cancer	42	P42224, P60953, P08581, Q01970, Q02750, P35221, P35222, P04899, P26006, P11166, Q9UBI6, P07900, P11233, P12830, Q13363, P62873, P06756, P17301, P14625, P15153, P16885, Q15370, P28482, P60763, P07942, P11047, P63096, P29992, P08754, P05556, P14923, P63000, Q14344, O15230, P08238, P06753, Q05397, P61586, P01116, P23229, P00533, P40763	0.0257557		hsa01212:Fatty acid metabolism	15	P24752, P49748, Q9NZ01, P42765, P49327, O95573, Q13085, Q9ULC5, Q9BWD1, P30084, P40939, P55084, Q16836, O60488, Q53GQ0	0.0101753		hsa05213:Endometrial cancer	10	P12830, P62993, Q13418, P28482, P35221, Q02750, P01116, P10398, P35222, P01111	0.0887578
hsa00970:Aminoacyl-tRNA biosynthesis	12	P26640, P07814, P14868, P49588, P26639, P47897, Q9NSD9, P41252, P41250, P49591, P54136, P23381	0.0331339		hsa00520:Amino sugar and nucleotide sugar metabolism	15	Q16851, Q06210, Q16222, Q9Y5P6, O60701, P06744, O60547, O95394, Q8N0W3, Q96IJ6, P36871, Q9UJ70, O15305, P00387, P51570	0.0101753		hsa00630:Glyoxylate and dicarboxylate metabolism	7	P24752, P40926, Q9BWD1, P34897, P09622, O75390, P21399	0.0913022
hsa04915:Estrogen signaling pathway	15	P08754, P12931, Q01970, Q02750, P04899, P62158, P11142, P07900, P08238, P14625, P0DMV8, P28482, P01116, P00533, P63096	0.0460737		hsa05203:Viral carcinogenesis	41	Q16531, P12931, P60953, Q14160, O00571, P06493, P31946, P61981, Q13547, P12814, Q7KZF4, P27986, P27348, P62993, P43405, P28482, O43707, P61978, P63104, P62805, P23458, Q14790, Q5T4S7, Q14839, Q93009, P63000, P04637, Q07812, P62258, P49023, P61586, Q04206, Q04917, P14618, P05534, P01116, P62191, P40763, P01111, Q12959, Q9Y277	0.0109103		hsa05216:Thyroid cancer	7	P12830, P06753, P28482, Q02750, P01116, P35222, P01111	0.106217
hsa04730:Long-term depression	11	P08754, Q14344, P28482, P30153, Q01970, Q02750, P01116, P63096, P04899, P29992, P07948	0.0471427		hsa04145:Phagosome	32	P07437, Q9Y6G9, O15400, P27797, P60709, P61020, P68371, O14964, Q93050, Q8WTV0, P18084, P06756, P17301, P38606, P68366, P31146, P27824, P05556, P02786, Q9UI12, P11279, P51149, P61619, P15313, P21281, P51148, P63000, O75396, P20339, Q14204, P63261, P05534	0.0136111		hsa05230:Central carbon metabolism in cancer	11	O15427, P11166, Q01813, Q15758, P18669, P11413, P28482, Q02750, Q01650, P01116, P01111	0.107449
hsa05169:Epstein-Barr virus infection	17	P43686, P35998, O43242, Q13200, Q99460, P62195, P16885, Q15008, P17980, P51665, P62333, O00231, P16070, P62191, P40763, O00232, P07948	0.0538821		hsa00970:Aminoacyl-tRNA biosynthesis	18	P56192, P49589, P49588, P14868, P47897, P26639, P41252, P54577, P41250, P54136, P26640, Q15046, O43776, P07814, Q9P2J5, Q9NSD9, P49591, P23381	0.0137889		hsa04666:Fc gamma R-mediated phagocytosis	13	Q9BPX5, P50552, P60953, O15145, P28482, P29966, P62330, P59998, Q9Y6W5, Q02750, P23528, P63000, P07948	0.108962
hsa04141:Protein processing in endoplasmic reticulum	21	P30101, P17655, P31689, O60884, P07384, Q9UMX0, O94979, P61077, P07900, P11142, Q14697, P08238, P14625, P0DMV8, P07237, P51572, P11021, P05198, Q9Y4L1, P55072, Q92598	0.0660194		hsa05211:Renal cell carcinoma	18	P60953, O96013, P08581, Q02750, Q13177, P10398, P63000, P11166, P27986, P62993, Q15370, Q06124, P28482, P07954, P01116, P36507, P01111, P61224	0.0137889		hsa05412:Arrhythmogenic right ventricular cardiomyopathy (ARVC)	11	P02545, P15924, P05556, P17301, P63261, P60709, P16144, P35221, P23229, Q99959, P35222	0.131723
hsa05212:Pancreatic cancer	11	P11233, P42224, P60953, P15153, P28482, P60763, Q02750, P01116, P00533, P40763, P63000	0.071149		hsa00330:Arginine and proline metabolism	15	P51648, Q96C36, P19623, P17174, P00505, P54886, P05091, P27338, Q96KP4, P49189, P13674, P52788, P30038, P28838, P49419	0.0138917		hsa04540:Gap junction	13	P08754, P07437, Q71U36, Q02750, P06493, P68371, P62993, P68366, P28482, P01116, P01111, P29992, Q07157	0.142436
hsa05203:Viral carcinogenesis	24	P60953, P12931, Q5T4S7, Q14160, O00571, P31946, P61981, P63000, P12814, P27348, Q7KZF4, P49023, P62258, P61586, P28482, Q04917, O43707, P01116, P62191, P40763, P07948, P62805, P63104, Q12959	0.0717753		hsa05412:Arrhythmogenic right ventricular cardiomyopathy (ARVC)	18	P15924, P05556, P60709, P16144, P35221, P14923, P35222, P26006, P18084, P02545, P06756, P18564, P17301, Q14126, P63261, P23229, Q99959, P26232	0.014664		hsa00051:Fructose and mannose metabolism	7	P60174, Q01813, P04075, Q00796, P15121, Q8N0W3, Q96IJ6	0.148335
hsa05211:Renal cell carcinoma	11	P11166, P60953, Q15370, O96013, P08581, Q06124, P28482, Q02750, P01116, P61224, P63000	0.0767472		hsa00250:Alanine, aspartate and glutamate metabolism	12	Q06210, P00966, Q06203, P08243, Q9NQR4, P27708, P17174, P30520, P30038, P00505, P04424, P30566	0.0149735		hsa04730:Long-term depression	10	P08754, Q14344, P28482, P30153, Q02750, P01116, P10398, P01111, P29992, P07948	0.155254
hsa05412:Arrhythmogenic right ventricular cardiomyopathy (ARVC)	11	P18084, P06756, P05556, P17301, P63261, P16144, P14923, P35221, P23229, P35222, P26006	0.0826154		hsa00480:Glutathione metabolism	15	P19623, P78417, P48735, Q9Y2Q3, O75223, P48637, P23921, O75874, O95881, P52788, P52209, P11413, P18283, P28838, P48506	0.0153063		hsa05169:Epstein-Barr virus infection	16	P43686, P35998, Q13200, Q99460, P62195, O00487, P08670, Q15008, P17980, P51665, P62333, P05534, O00231, P62191, O00232, P07948	0.156371
hsa04014:Ras signaling pathway	25	P29317, P60953, P62070, O96013, P08581, Q02750, P51148, P63000, P62158, P55196, Q9UBI6, P20339, P11233, P62873, P15153, P16885, Q06124, P61586, P28482, P60763, P62330, P10301, P01116, P00533, P61224	0.103839		hsa04360:Axon guidance	28	P29317, P60953, P08581, Q08209, O15031, P23528, P04899, Q16555, P15153, P28482, Q00535, P63096, P08754, P20936, P05556, O96013, Q13177, O75044, P63000, Q9UIW2, O75051, Q05397, P54760, P61586, O75116, P01116, P01111, P98172	0.0153877		hsa00480:Glutathione metabolism	9	P48637, P23921, O75874, P19623, P52788, P11413, P52209, P78417, P28838	0.159138
hsa05146:Amoebiasis	14	P12814, P20339, P18206, O15230, Q05397, P07942, Q01970, P11047, P35237, O43707, P51149, P04792, P29992, P51148	0.143392		hsa04611:Platelet activation	28	Q92888, P36873, P12931, P60709, Q01970, P04899, P62136, P27986, P41743, P17301, P43405, P28482, Q9NRY4, P63096, P61224, Q5JWF2, O00161, P08754, Q9Y490, P05556, P62140, P50148, O14950, Q14344, P50552, P61586, P63261, O75116	0.0206813		hsa01210:2-Oxocarboxylic acid metabolism	5	O75874, P17174, P00505, O75390, P21399	0.162189
hsa04962:Vasopressin-regulated water reabsorption	8	Q96FJ2, P20339, Q9Y6G9, Q14204, P46459, P52565, P62491, P51148	0.144397		hsa04540:Gap junction	21	Q5JWF2, P08754, P07437, P12931, P50148, Q01970, Q02750, P06493, P68371, P04899, P48730, P62993, P68366, P28482, P01116, P36507, P00533, P63096, P01111, P29992, Q07157	0.0229368		hsa04910:Insulin signaling pathway	17	O75955, Q13131, Q14254, P36873, P49327, Q02750, P62753, P10398, P06737, P13861, P62158, P62136, P62993, P28482, P11216, P01116, P01111	0.200106
hsa00250:Alanine, aspartate and glutamate metabolism	7	Q06210, P00966, P08243, P27708, P17174, P04424, P30566	0.144814		hsa04730:Long-term depression	16	Q5JWF2, P08754, P30153, P50148, Q02750, Q01970, P10398, P04899, P08069, Q14344, P28482, P01116, P63096, P36507, P01111, P29992	0.0268813		hsa04961:Endocrine and other factor-regulated calcium reabsorption	8	O94973, Q00610, O95782, P62491, P63010, P05023, Q96CW1, P05026	0.204026
hsa04066:HIF-1 signaling pathway	13	P04406, P02786, P06733, P62753, Q02750, P11166, P13929, Q15370, P16885, P28482, P00533, P40763, Q13557	0.146197		hsa03013:RNA transport	34	P60228, O14744, Q96EE3, Q14974, Q14240, P23588, P47813, Q7L576, Q8N1F7, P62826, O00303, P38919, Q92900, P68104, O75822, Q8IYB3, Q9UHI6, P46060, Q04637, Q14152, P57678, Q9UI10, P55884, P60842, Q5SRE5, Q13347, P11940, O60841, O14980, O15371, Q8NI27, P05198, P78344, P41091	0.0271555		hsa04611:Platelet activation	16	P08754, Q9Y490, P36873, P05556, P60709, P62136, O14950, Q14344, P50552, P17301, P61586, P63261, P28482, P06241, P07948, P61224	0.220587
hsa04720:Long-term potentiation	10	P62140, P51812, P28482, Q01970, Q02750, P01116, Q13557, P61224, P62136, P62158	0.159293		hsa04961:Endocrine and other factor-regulated calcium reabsorption	13	Q5JWF2, P50570, P50148, Q01970, P63010, P62491, Q05193, O94973, Q00610, O95782, P05023, Q96CW1, P05026	0.0350787		hsa04720:Long-term potentiation	10	P36873, P51812, P28482, Q02750, P01116, P10398, P01111, P61224, P62136, P62158	0.224037
hsa04512:ECM-receptor interaction	12	P18084, P06756, O15230, P05556, P12109, P17301, P07942, P16144, P11047, P23229, P16070, P26006	0.159349		hsa04915:Estrogen signaling pathway	22	P08754, Q5JWF2, P12931, Q02790, P50148, Q01970, Q02750, P04899, P62158, P07900, P11142, P27986, P62993, P14625, P08238, P0DMV8, P28482, P01116, P36507, P00533, P63096, P01111	0.0390876		hsa04915:Estrogen signaling pathway	13	P08754, P07900, P11142, P14625, P08238, P62993, P0DMV8, Q02790, P28482, Q02750, P01116, P01111, P62158	0.238395
hsa04114:Oocyte meiosis	14	P62140, P51812, P30153, Q02750, P31946, P61981, P62158, P62136, P27348, P62258, P28482, Q04917, Q13557, P63104	0.172641		hsa04910:Insulin signaling pathway	28	P36873, Q02750, P62753, P10398, P06737, Q9UPT5, P13861, P62136, P62158, P27986, P10586, P41743, O15530, P62993, P54619, P28482, Q15382, P11216, P42345, P36507, Q13131, O75955, Q14254, P62140, P49327, Q13085, P01116, P01111	0.0416076		hsa00330:Arginine and proline metabolism	8	Q96KP4, P49189, P19623, P17174, P52788, P00505, P28838, P05091	0.291128
hsa04151:PI3K-Akt signaling pathway	33	P29317, P08581, P30153, Q02750, P62753, P31946, P61981, P26006, Q9UBI6, P18084, P07900, P27348, P62873, P06756, P17301, P14625, P28482, P07942, P11047, P63104, Q16543, P05556, P16144, P63000, O15230, P12109, P08238, Q05397, P62258, Q04917, P01116, P23229, P00533	0.190017		hsa04720:Long-term potentiation	16	P62140, P36873, P51812, P50148, Q08209, Q01970, Q02750, P10398, P62158, P62136, Q15418, P28482, P01116, P36507, P01111, P61224	0.059963		hsa04390:Hippo signaling pathway	17	P63151, P36873, Q14160, Q6P1M3, P60709, P30153, P35221, P31946, P61981, P35222, P62136, P12830, P62258, P63261, Q04917, P63104, Q12959	0.324151
hsa05216:Thyroid cancer	6	P12830, P06753, P28482, Q02750, P01116, P35222	0.193588		hsa04015:Rap1 signaling pathway	38	P29317, P12931, P60953, P08581, P60709, Q01970, Q02750, P35222, P04899, P62158, P55196, P07737, P41743, P27986, P12830, P15153, O60716, P28482, P63096, P36507, P46734, P61224, P08754, Q5JWF2, Q9Y490, P05556, P50148, P63000, Q9BYG5, P08069, P50552, P61586, P63261, P10301, P35080, P01116, P00533, P01111	0.0604184		hsa05110:Vibrio cholerae infection	8	P13667, P38606, P55011, P63261, P60709, Q9UDY2, P21281, Q07157	0.326008
hsa04062:Chemokine signaling pathway	20	P08754, P42224, P60953, P12931, Q01970, Q02750, P04899, P63000, Q9UBI6, P62873, P15153, Q05397, P49023, P61586, P28482, P01116, P63096, P40763, P07948, P61224	0.201105		hsa00630:Glyoxylate and dicarboxylate metabolism	9	P24752, P40925, P40926, Q9BWD1, P34897, Q99798, P09622, O75390, P21399	0.0636953		hsa04722:Neurotrophin signaling pathway	14	P60953, P51812, P52565, Q02750, P63000, P62158, P62993, P62258, P61586, Q06124, P28482, P01116, P01111, P61224	0.362192
hsa04921:Oxytocin signaling pathway	17	P08754, P62140, P12931, P60660, Q01970, Q02750, P04899, P62158, P62136, P13639, P61586, P63261, P28482, P01116, P00533, P63096, Q13557	0.204154		hsa05120:Epithelial cell signaling in Helicobacter pylori infection	16	P60953, P12931, P08581, P41240, O14672, Q9UI12, P15313, P21281, P63000, Q93050, P38606, Q06124, Q04206, P00533, Q9Y624, Q07157	0.0646543
hsa00020:Citrate cycle (TCA cycle)	6	P40925, P40926, O75874, P53396, P36957, P21399	0.206468		hsa00640:Propanoate metabolism	9	P24752, Q13085, Q9NUB1, P30084, Q9BWD1, P53597, P40939, P00338, P07195	0.0764305
hsa00052:Galactose metabolism	6	Q16851, Q01813, P36871, P08237, P15121, P17858	0.206468		hsa04071:Sphingolipid signaling pathway	24	P08754, P63151, P30153, P50148, Q01970, Q02750, P04899, P63000, P04637, Q14344, P27986, O15530, P15153, P33527, Q07812, P61586, O75116, Q04206, P28482, Q14738, P01116, P36507, P63096, P01111	0.0797927
hsa04722:Neurotrophin signaling pathway	14	P60953, P51812, P62258, P16885, P61586, P52565, Q06124, P28482, Q02750, P01116, Q13557, P61224, P62158, P63000	0.242921		hsa04721:Synaptic vesicle cycle	15	P46459, P50570, Q9UI12, P63010, P15313, P21281, Q93050, Q05193, P61764, O94973, P38606, Q00610, O95782, P54920, Q96CW1	0.080271
hsa04071:Sphingolipid signaling pathway	14	P08754, P30153, Q02750, Q01970, P04899, P63000, Q14344, P15153, P33527, P61586, P28482, P60763, P01116, P63096	0.242921		hsa05169:Epstein-Barr virus infection	24	P43686, P35998, O43242, Q13200, P23458, Q99460, Q93009, O00487, P62195, P04637, Q13547, P27986, P43405, P17980, Q15008, Q04206, P62333, P05534, O00231, P16070, P46734, P62191, P40763, O00232	0.0889631
hsa05213:Endometrial cancer	8	P12830, Q13418, P28482, P35221, Q02750, P01116, P00533, P35222	0.243075		hsa05216:Thyroid cancer	9	P04637, P12830, P06753, P28482, Q02750, P01116, P36507, P35222, P01111	0.0889736
hsa04721:Synaptic vesicle cycle	9	P61764, P38606, P21579, P46459, P50570, Q00610, P63010, P21281, P54920	0.244406		hsa05110:Vibrio cholerae infection	13	P13667, Q5JWF2, P38606, P55011, P63261, P60709, Q9UI12, Q9UDY2, P21281, P15313, P61619, Q93050, Q07157	0.0893402
hsa05145:Toxoplasmosis	13	P08754, P42224, P05556, P04899, P11142, O15230, P0DMV8, P28482, P07942, P11047, P23229, P63096, P40763	0.2604		hsa04666:Fc gamma R-mediated phagocytosis	18	Q92747, Q9BPX5, P60953, O15144, O15145, O15143, Q9Y6W5, Q02750, P23528, P63000, P27986, P50552, P15153, P43405, P28482, P29966, P62330, P59998	0.0976101
hsa00040:Pentose and glucuronate interconversions	6	Q16851, Q00796, O60701, P15121, Q7Z4W1, P14550	0.260588		hsa04114:Oocyte meiosis	22	P62140, P36873, P51812, P30153, Q9H2G2, Q08209, Q02750, P06493, P31946, P61981, P62158, P62136, P08069, Q15418, P27348, P62258, Q14683, Q13616, P28482, Q14738, Q04917, P63104	0.10506
hsa00500:Starch and sucrose metabolism	6	Q16851, P36871, P35573, P11216, P06744, P06737	0.260588		hsa00062:Fatty acid elongation	8	Q9NZ01, P42765, P30084, P40939, P55084, Q16836, O00154, Q53GQ0	0.108659
hsa04024:cAMP signaling pathway	20	P08754, P62140, P23634, P62070, Q02750, P20020, P04899, P62158, P63000, P62136, P55196, P15153, P61586, P28482, P60763, P10301, P05023, P63096, Q13557, P61224	0.283523		hsa00410:beta-Alanine metabolism	9	P51648, Q96KP4, P49189, P19623, P52788, P30084, P40939, P49419, P05091	0.117212
hsa04390:Hippo signaling pathway	16	P62140, Q14160, Q6P1M3, P30153, P35221, P31946, P61981, P35222, P62136, P27348, P12830, P62258, P63261, Q04917, P63104, Q12959	0.30756		hsa04370:VEGF signaling pathway	14	P60953, P12931, Q08209, Q02750, P63000, P27986, P15153, P49023, Q05397, P28482, P01116, P36507, P04792, P01111	0.117978
hsa04919:Thyroid hormone signaling pathway	13	P42224, P12931, Q8N3E9, Q02750, Q01970, P35222, P11166, P06756, P16885, P63261, P28482, P01116, P05023	0.30959		hsa05223:Non-small cell lung cancer	13	P04637, P27986, Q13043, O15530, P62993, P28482, Q02750, Q9HC35, P01116, P10398, P00533, P36507, P01111	0.132521
					hsa05215:Prostate cancer	18	Q02750, P10398, P35222, P04637, P08069, P27986, P07900, O15530, P62993, P14625, P08238, Q04206, P28482, P42345, P01116, P36507, P00533, P01111	0.134183
					hsa04919:Thyroid hormone signaling pathway	22	P42224, P12931, Q8N3E9, P60709, Q01970, Q02750, P35222, P04637, P11166, Q13547, P27986, P06756, O15530, Q15382, P63261, P28482, P42345, P01116, P36507, P05023, P01111, P05026	0.134286
					hsa00310:Lysine degradation	12	P24752, P51648, P49189, P30084, Q9BWD1, P40939, P36957, Q16836, Q8NBJ5, P49419, O60568, P05091	0.165535
					hsa05212:Pancreatic cancer	14	P04637, P27986, P23458, P42224, P60953, P15153, P28482, Q04206, Q02750, P01116, P10398, P00533, P40763, P63000	0.165774
					hsa00380:Tryptophan metabolism	10	P24752, P51648, P49189, P27338, P30084, Q9BWD1, P40939, Q16836, P49419, P05091	0.166308
					hsa05200:Pathways in cancer	60	Q13043, P42224, P35221, Q01970, P10398, P26006, P11166, P27986, P12830, P62993, P15153, Q15370, P63096, P36507, P29992, P05556, Q14790, P63000, P04637, P08069, Q14344, O15230, P08238, P06753, Q07812, P61586, Q04206, Q92888, P60953, P08581, Q02750, P35222, P04899, Q13547, Q9UBI6, P07900, Q13363, P62873, P14625, P17301, P06756, P62879, P28482, P07942, P11047, P42345, P08754, Q5JWF2, P23458, P50148,…	0.166572
					hsa05410:Hypertrophic cardiomyopathy (HCM)	16	Q13131, P05556, P60709, P16144, P26006, P18084, P02545, P09493, P06756, P17301, P18564, P06753, P54619, P63261, P67936, P23229	0.1673
					hsa05146:Amoebiasis	20	Q5JWF2, P30740, P18206, P50148, Q01970, P35237, P51149, P61020, P51148, P12814, P27986, P20339, O15230, Q05397, Q04206, P07942, P11047, O43707, P04792, P29992	0.176957
					hsa04722:Neurotrophin signaling pathway	22	P60953, P51812, P52565, P52566, Q02750, P62158, P63000, P04637, Q15418, P27986, O15530, P62993, Q07812, P62258, P61586, Q06124, Q04206, P28482, P01116, P36507, P01111, P61224	0.178085
					hsa05219:Bladder cancer	10	P04637, P12830, P12931, P28482, Q02750, P01116, P10398, P36507, P00533, P01111	0.182164
					hsa04921:Oxytocin signaling pathway	26	P36873, P12931, P60709, Q08209, Q01970, Q02750, P04899, P62158, P62136, P54619, P28482, P36507, P63096, Q13131, Q5JWF2, P08754, P62140, P60660, P50148, P13639, P61586, P63261, O75116, P01116, P00533, P01111	0.19787
					hsa04390:Hippo signaling pathway	26	P63151, P36873, Q14160, Q92796, P60709, P30153, P35221, P31946, P35222, P61981, P62136, P48730, P27348, P41743, P12830, Q9H8S9, P63104, P62140, Q6P1M3, Q9BYG5, P35240, P62258, P63261, Q04917, P26232, Q12959	0.205053
					hsa00061:Fatty acid biosynthesis	5	Q13085, Q9ULC5, O95573, P49327, O60488	0.207401
					hsa05221:Acute myeloid leukemia	12	P27986, P62993, P28482, Q04206, P14923, Q02750, P01116, P10398, P42345, P36507, P01111, P40763	0.223242
					hsa04962:Vasopressin-regulated water reabsorption	10	Q5JWF2, P20339, Q9Y6G9, Q14204, P46459, P52565, P52566, P61020, P62491, P51148	0.237931
					hsa00230:Purine metabolism	29	Q9UIJ7, P21589, P30520, P07741, P12268, P49915, P30566, P00492, P00491, P22392, Q16774, P22102, Q8TCS8, P00568, P55263, Q01433, Q06203, P31939, P24928, P23921, P27144, P20839, P22234, P36871, P60891, O15067, O95340, P14618, Q9UKK9	0.239363
					hsa03018:RNA degradation	15	Q15477, P26196, Q01813, Q9Y2L1, P06733, P38646, P17858, Q6P2E9, A5YKK6, P11940, Q8TCS8, P13929, P10809, P08237, Q96C86	0.240476
					hsa04150:mTOR signaling pathway	12	Q13131, Q15418, P27986, Q9Y376, O15530, P51812, P28482, Q15382, Q6R327, P62753, P42345, P23588	0.254394
					hsa00920:Sulfur metabolism	4	P25325, Q9Y6N5, O95340, O95571	0.256672
					hsa05214:Glioma	13	P04637, P08069, P27986, P62993, P28482, Q02750, P01116, P10398, P42345, P00533, P36507, P01111, P62158	0.25811
					hsa04960:Aldosterone-regulated sodium reabsorption	9	P27986, Q15599, O15530, Q96PU5, P28482, P31947, P01116, P05023, P05026	0.265594
					hsa04022:cGMP-PKG signaling pathway	26	P36873, P45880, Q08209, Q02750, Q01970, P16615, P04899, P62158, P62136, P05141, P28482, P36507, P05023, P63096, P05026, P29992, P08754, P62140, P50148, P20020, Q14344, P50552, P61586, O75116, P78347, Q9Y277	0.272264

## Sheet: Small-EV only
Figure 3 Small-Evs only KEGG analysis
Benjamini-Hochberg corrected p-values
HCT116 Small-EV only Proteins 159					HT29 Small-EV only Proteins 201					SW620 Small-EV only Proteins 104
Term:	Gene Count:	Gene Uniprot ID	Benjamini Value:		Term:	Gene Count:	Gene Uniprot ID	Benjamini Value:		Term:	Gene Count:	Gene Uniprot ID	Benjamini Value:
hsa04512:ECM-receptor interaction	9	P02751, P49746, P12110, P12111, O00468, P07996, P98160, P05106, Q08722	0.00109283		hsa04512:ECM-receptor interaction	11	P35443, P02751, P12110, P18827, P12111, P12109, P56199, P16671, P07996, P05106, Q08722	7.40782e-05		hsa04512:ECM-receptor interaction	8	P02751, P24821, P12110, P06756, P12111, P16671, P07996, P05106	0.000425939
hsa04144:Endocytosis	14	Q9BPX5, O43633, Q9UQ16, P01892, Q8WUM4, O15511, P61020, Q8TEW0, Q9BYG5, Q9NZN3, Q9H7P6, A5D8V6, Q7LBR1, P30455, P30466, P30485	0.00164344		hsa04144:Endocytosis	15	O43633, Q9UQ16, Q9UL26, Q8WUM4, O15511, P61073, Q96CF2, P84022, Q8TEW0, Q9NZN3, Q9HCE7, A5D8V6, Q96EY5, Q7LBR1, P30455	0.000756838		hsa04144:Endocytosis	10	Q9H7P6, O43633, Q9HAU4, Q9UL26, Q96PU5, Q9UQN3, Q7LBR1, O15511, Q9NZN4, Q9H9H4	0.00439277
hsa05100:Bacterial invasion of epithelial cells	6	Q92556, P02751, Q9BPX5, Q9UQ16, P48736, O15511	0.119495		hsa04510:Focal adhesion	11	Q9HBI1, P35443, P02751, P12110, P12111, P12109, P56199, P06241, P07996, P05106, P35609	0.0439376		hsa04510:Focal adhesion	7	P02751, P24821, P12110, P06756, P12111, P07996, P05106	0.154407
hsa04510:Focal adhesion	9	Q9HBI1, P02751, P49746, P12110, P12111, P48736, P07996, P05106, P35609	0.141938		hsa04145:Phagosome	9	P35443, P05164, Q71U36, Q15836, P30455, P16671, P07996, Q9BUF5, P05106	0.0614854		hsa05205:Proteoglycans in cancer	6	P02751, P06756, P35052, P07996, P08962, P05106	0.31783
hsa04145:Phagosome	8	P05164, P49746, Q9Y5K8, P01892, P30455, P30466, P61020, P07996, P30485, P05106	0.149501		hsa04919:Thyroid hormone signaling pathway	7	P46531, Q04721, P16885, P12644, P22694, Q9UM47, P05106	0.170325		hsa04151:PI3K-Akt signaling pathway	8	P02751, P24821, P12110, P06756, P12111, P63218, P07996, P05106	0.344394
hsa04062:Chemokine signaling pathway	8	Q92556, Q92608, P52333, P63218, P50151, P48736, Q7LDG7, Q8TEW0	0.229207		hsa05144:Malaria	5	P35443, Q07954, P18827, P16671, P07996	0.172584		hsa04145:Phagosome	5	P05164, P06756, P16671, P07996, P05106	0.38152
hsa05205:Proteoglycans in cancer	8	P02751, P48736, P35052, P00749, P07996, P08962, P98160, P05106	0.247343		hsa04530:Tight junction	6	O15551, P62714, Q15334, O95832, P35609, Q8TEW0	0.191592		hsa05144:Malaria	3	Q07954, P16671, P07996	0.548034
hsa04151:PI3K-Akt signaling pathway	11	P02751, P52333, P49746, P12110, P62714, P12111, P63218, P50151, P48736, P07996, P05106	0.250342		hsa04611:Platelet activation	7	P16885, P06241, Q7LDG7, P22694, Q86UX7, P05106, P07948	0.221318
hsa04666:Fc gamma R-mediated phagocytosis	5	Q92608, Q9BPX5, P48736, O15511, P49006	0.335967		hsa04514:Cell adhesion molecules (CAMs)	7	O95297, O15551, P18827, P08575, O95832, P30455, Q5ZPR3	0.283319
hsa04530:Tight junction	5	O15551, P62714, P35609, Q9BYG5, Q8TEW0	0.338761		hsa04520:Adherens junction	5	Q12913, P06241, P84022, P35609, Q8TEW0	0.290738
hsa00534:Glycosaminoglycan biosynthesis - heparan sulfate / heparin	3	O14792, Q16394, Q96MM7	0.404491		hsa05130:Pathogenic Escherichia coli infection	4	Q71U36, P06241, O15511, Q9BUF5	0.380243
hsa04514:Cell adhesion molecules (CAMs)	6	O95297, O15551, P01892, P30455, P30466, P30485, P22223, P13611	0.411421		hsa04666:Fc gamma R-mediated phagocytosis	5	P08575, P16885, O15511, P49006, P07948	0.391607
hsa04015:Rap1 signaling pathway	7	P11234, P48736, Q7LDG7, P07996, P05106, Q9BYG5, Q8TEW0	0.487731		hsa04350:TGF-beta signaling pathway	5	Q9HCE7, P62714, P07996, P84022, P12644	0.391607
hsa04810:Regulation of actin cytoskeleton	7	P02751, Q9BPX5, P55160, P48736, O15511, P05106, P35609	0.487731		hsa04360:Axon guidance	6	P54753, Q99985, O43157, P52799, P06241, P61073	0.399109
hsa04014:Ras signaling pathway	7	P11234, P63218, P50151, P48736, Q7LDG7, P61020, Q14644	0.566037		hsa04330:Notch signaling pathway	4	P46531, Q04721, Q9UM47, P78536	0.405587
					hsa04320:Dorso-ventral axis formation	3	P46531, Q04721, Q9UM47	0.502191
					hsa04151:PI3K-Akt signaling pathway	10	P35443, P02751, P12110, P62714, P12111, P12109, P56199, P50151, P07996, P05106	0.507171
					hsa05205:Proteoglycans in cancer	7	P02751, P18827, P16885, P07996, P08962, P22694, P05106	0.52888
					hsa04130:SNARE interactions in vesicular transport	3	Q12846, Q15836, Q13277	0.567345
					hsa05020:Prion diseases	3	P46531, P06241, P22694	0.567345
					hsa04670:Leukocyte transendothelial migration	5	O15551, P16885, O95832, P61073, P35609	0.582516
