# Supplementary material for: Characterisation of Colorectal Cancer Cell Lines through Proteomic Profiling of Their Extracellular Vesicles
Source: Proteomes. 2023 Jan 11;11(1):3. doi: 10.3390/proteomes11010003 (PMC9844407; doi:10.3390/proteomes11010003)
Supplement: Supplementary file 1 [file proteomes-11-00003-s001.zip › Table S5.xlsx]

## Sheet: Sheet 1
cell_line	genelist	rank	term.ID	term.description	observed.gene.count	background.gene.count	strength	false.discovery.rate	matching.proteins.in.your.network..IDs.	matching.proteins.in.your.network..labels.
HCT116	cell&exo	1	hsa03010	Ribosome	42	130	0.97	3.84e-22	9606.ENSP00000222247,9606.ENSP00000225430,9606.ENSP00000251453,9606.ENSP00000262584,9606.ENSP00000270625,9606.ENSP00000296674,9606.ENSP00000302896,9606.ENSP00000307889,9606.ENSP00000309334,9606.ENSP00000311430,9606.ENSP00000339795,9606.ENSP00000341885,9606.ENSP00000346001,9606.ENSP00000346015,9606.ENSP00000346027,9606.ENSP00000346050,9606.ENSP00000346067,9606.ENSP00000346088,9606.ENSP00000354739,…	RPL18A,RPL19,RPS16,RPL8,RPS11,RPS23,RPS9,RPL13,RPL15,RPL4,RPL7,RPS2,RPL3,RPL27A,RPL21,RPS3A,RPSA,RPL22,RPL12,RPL5,RPL7A,RPS4X,RPL10A,RPL11,RPS6,RPL13A,RPL24,RPL34,RPL14,RPS8,RPS14,RPS18,RPL6,RPL10,RPS24,RPL23,RPS25,RPL18,RPLP0,RPL28,RPL36,RPL27
HCT116	cell&exo	2	hsa04810	Regulation of actin cytoskeleton	47	209	0.81	1.41e-19	9606.ENSP00000007722,9606.ENSP00000200181,9606.ENSP00000211998,9606.ENSP00000215832,9606.ENSP00000216181,9606.ENSP00000225655,9606.ENSP00000228825,9606.ENSP00000246792,9606.ENSP00000249071,9606.ENSP00000252699,9606.ENSP00000256078,9606.ENSP00000256196,9606.ENSP00000261023,9606.ENSP00000268182,9606.ENSP00000275493,9606.ENSP00000296181,9606.ENSP00000296585,9606.ENSP00000298159,9606.ENSP00000302486,…	ITGA3,ITGB4,VCL,MAPK1,MYH9,PFN1,ARPC3,RRAS,RAC2,ACTN4,KRAS,RRAS2,ITGAV,IQGAP1,EGFR,ITGB5,ITGA2,CFL2,MAP2K1,RAC3,BAIAP2,PPP1CA,PTK2,MSN,MYH10,NCKAP1,IQGAP3,ENAH,EZR,GNG12,SRC,ACTN1,PPP1CB,ITGB1,CDC42,RDX,ITGA6,ARPC4,ARPC1B,RHOA,GNA13,CFL1,ACTG1,MYL12B,PAK4,CYFIP1,WASF2
HCT116	cell&exo	3	hsa03050	Proteasome	25	43	1.23	6.14e-18	9606.ENSP00000044462,9606.ENSP00000157812,9606.ENSP00000216455,9606.ENSP00000219313,9606.ENSP00000223321,9606.ENSP00000259457,9606.ENSP00000261303,9606.ENSP00000261479,9606.ENSP00000261712,9606.ENSP00000264639,9606.ENSP00000270586,9606.ENSP00000271308,9606.ENSP00000290541,9606.ENSP00000309474,9606.ENSP00000310129,9606.ENSP00000310572,9606.ENSP00000348442,9606.ENSP00000359910,9606.ENSP00000362334,…	PSMA4,PSMC4,PSMA3,PSMD7,PSMA2,PSMB7,PSMC1,PSMA6,PSMD11,PSMD3,PSMB6,PSMA5,PSMB4,PSMD1,PSMD2,PSMC5,PSMD12,PSMA7,PSMB2,PSMC2,PSMC6,PSMA1,ADRM1,PSMC3,PSMB3
HCT116	cell&exo	4	hsa04144	Endocytosis	47	241	0.75	1.12e-17	9606.ENSP00000217402,9606.ENSP00000220325,9606.ENSP00000228825,9606.ENSP00000229340,9606.ENSP00000251968,9606.ENSP00000253794,9606.ENSP00000254950,9606.ENSP00000256682,9606.ENSP00000261890,9606.ENSP00000262435,9606.ENSP00000263277,9606.ENSP00000264710,9606.ENSP00000265062,9606.ENSP00000267202,9606.ENSP00000269886,9606.ENSP00000273047,9606.ENSP00000275493,9606.ENSP00000298316,9606.ENSP00000299138,…	CHMP4B,EHD4,ARPC3,RAB35,TSG101,VPS25,VPS4A,ARF3,RAB11A,SMURF2,EHD2,RAB10,RAB7A,VPS37B,SH3GL1,RAB5A,EGFR,ARF6,VPS35,RAB8A,ARF4,KIF5B,CHMP4A,MVB12A,HGS,TFRC,CAPZA2,RAB4A,VTA1,SRC,HSPA1B,VPS28,VPS36,DNM2,CDC42,NEDD4L,ARPC4,ARPC1B,RHOA,SNF8,HSPA8,IST1,RAB5C,EHD1,CLTC,ITCH,AP2B1
HCT116	cell&exo	5	hsa05012	Parkinson disease	46	240	0.74	4.02e-17	9606.ENSP00000044462,9606.ENSP00000157812,9606.ENSP00000216455,9606.ENSP00000219313,9606.ENSP00000223321,9606.ENSP00000246957,9606.ENSP00000248437,9606.ENSP00000256383,9606.ENSP00000259457,9606.ENSP00000261303,9606.ENSP00000261479,9606.ENSP00000261712,9606.ENSP00000262030,9606.ENSP00000264071,9606.ENSP00000264639,9606.ENSP00000270586,9606.ENSP00000271308,9606.ENSP00000272298,9606.ENSP00000290541,…	PSMA4,PSMC4,PSMA3,PSMD7,PSMA2,TRAP1,TUBA4A,EIF2S1,PSMB7,PSMC1,PSMA6,PSMD11,ATP5B,TUBB4A,PSMD3,PSMB6,PSMA5,CALM2,PSMB4,TUBA1A,KIF5B,PSMD1,PSMD2,PSMC5,GNAI2,TUBB6,TUBB3,HSPA5,UBA1,TUBB,CAMK2D,TUBB4B,GNAI1,PSMD12,GNAI3,PSMA7,PSMB2,TUBB2A,ATP5A1,PSMC2,PSMC6,PSMA1,PARK7,ADRM1,PSMC3,PSMB3
HCT116	cell&exo	6	hsa05020	Prion disease	45	265	0.69	4.71e-15	9606.ENSP00000044462,9606.ENSP00000157812,9606.ENSP00000215832,9606.ENSP00000216455,9606.ENSP00000217244,9606.ENSP00000219313,9606.ENSP00000223321,9606.ENSP00000248437,9606.ENSP00000249071,9606.ENSP00000256383,9606.ENSP00000258341,9606.ENSP00000259457,9606.ENSP00000261303,9606.ENSP00000261479,9606.ENSP00000261712,9606.ENSP00000262030,9606.ENSP00000264071,9606.ENSP00000264639,9606.ENSP00000270586,…	PSMA4,PSMC4,MAPK1,PSMA3,CSNK2A1,PSMD7,PSMA2,TUBA4A,RAC2,EIF2S1,LAMC1,PSMB7,PSMC1,PSMA6,PSMD11,ATP5B,TUBB4A,PSMD3,PSMB6,PSMA5,PSMB4,TUBA1A,KIF5B,PSMD1,PSMD2,PSMC5,TUBB6,TUBB3,HSPA5,TUBB,TUBB4B,PSMD12,PSMA7,PSMB2,HSPA1B,CSNK2B,TUBB2A,ATP5A1,PSMC2,PSMC6,PSMA1,HSPA8,ADRM1,PSMC3,PSMB3
HCT116	cell&exo	7	hsa04510	Focal adhesion	38	198	0.74	3.36e-14	9606.ENSP00000007722,9606.ENSP00000200181,9606.ENSP00000211998,9606.ENSP00000215832,9606.ENSP00000222399,9606.ENSP00000245932,9606.ENSP00000249071,9606.ENSP00000250559,9606.ENSP00000252699,9606.ENSP00000252999,9606.ENSP00000258341,9606.ENSP00000261023,9606.ENSP00000275493,9606.ENSP00000295006,9606.ENSP00000296181,9606.ENSP00000296585,9606.ENSP00000302486,9606.ENSP00000304283,9606.ENSP00000316029,…	ITGA3,ITGB4,VCL,MAPK1,LAMB1,VASP,RAC2,RAP1B,ACTN4,LAMA5,LAMC1,ITGAV,EGFR,CAPN2,ITGB5,ITGA2,MAP2K1,RAC3,TLN1,MET,PPP1CA,FLNC,PTK2,CTNNB1,COL6A1,FLNA,SRC,ACTN1,PPP1CB,ITGB1,ILK,CDC42,ITGA6,RHOA,FLNB,ACTG1,MYL12B,PAK4
HCT116	cell&exo	8	hsa05010	Alzheimer disease	50	355	0.61	5.73e-14	9606.ENSP00000044462,9606.ENSP00000157812,9606.ENSP00000215832,9606.ENSP00000216455,9606.ENSP00000217244,9606.ENSP00000219313,9606.ENSP00000223321,9606.ENSP00000229239,9606.ENSP00000248437,9606.ENSP00000256078,9606.ENSP00000256383,9606.ENSP00000259457,9606.ENSP00000260408,9606.ENSP00000261303,9606.ENSP00000261479,9606.ENSP00000261712,9606.ENSP00000262030,9606.ENSP00000264071,9606.ENSP00000264639,…	PSMA4,PSMC4,MAPK1,PSMA3,CSNK2A1,PSMD7,PSMA2,GAPDH,TUBA4A,KRAS,EIF2S1,PSMB7,ADAM10,PSMC1,PSMA6,PSMD11,ATP5B,TUBB4A,PSMD3,PSMB6,PSMA5,CALM2,PSMB4,NCSTN,CAPN2,TUBA1A,MAP2K1,KIF5B,PSMD1,PSMD2,PSMC5,TUBB6,TUBB3,TUBB,TUBB4B,CTNNB1,PSMD12,PSMA7,PSMB2,CSNK2B,TUBB2A,ATP5A1,PSMC2,PSMC6,PSMA1,CAPN1,PLCB3,ADRM1,PSMC3,PSMB3
HCT116	cell&exo	9	hsa05100	Bacterial invasion of epithelial cells	24	70	1	1.5e-13	9606.ENSP00000211998,9606.ENSP00000228825,9606.ENSP00000261769,9606.ENSP00000264893,9606.ENSP00000304669,9606.ENSP00000317272,9606.ENSP00000339467,9606.ENSP00000341189,9606.ENSP00000344456,9606.ENSP00000352264,9606.ENSP00000362680,9606.ENSP00000367991,9606.ENSP00000373905,9606.ENSP00000379350,9606.ENSP00000379975,9606.ENSP00000383118,9606.ENSP00000388169,9606.ENSP00000389631,9606.ENSP00000391249,…	VCL,ARPC3,CDH1,SEPT11,CTNNA1,MET,RHOG,PTK2,CTNNB1,CD2AP,SRC,SEPT8,DNM2,ITGB1,ILK,CDC42,ARPC4,ARPC1B,SEPT9,RHOA,ACTG1,CLTC,SEPT2,WASF2
HCT116	cell&exo	10	hsa05014	Amyotrophic lateral sclerosis	48	352	0.6	5.21e-13	9606.ENSP00000044462,9606.ENSP00000157812,9606.ENSP00000216455,9606.ENSP00000219313,9606.ENSP00000223321,9606.ENSP00000225655,9606.ENSP00000248437,9606.ENSP00000256383,9606.ENSP00000259457,9606.ENSP00000261303,9606.ENSP00000261479,9606.ENSP00000261712,9606.ENSP00000262030,9606.ENSP00000264071,9606.ENSP00000264639,9606.ENSP00000270586,9606.ENSP00000271308,9606.ENSP00000273047,9606.ENSP00000290541,…	PSMA4,PSMC4,PSMA3,PSMD7,PSMA2,PFN1,TUBA4A,EIF2S1,PSMB7,PSMC1,PSMA6,PSMD11,ATP5B,TUBB4A,PSMD3,PSMB6,PSMA5,RAB5A,PSMB4,RAB8A,TUBA1A,KIF5B,PSMD1,PSMD2,PSMC5,TUBB6,TUBB3,HSPA5,SRSF7,TUBB,TUBB4B,HNRNPA2B1,PSMD12,VCP,PSMA7,ANXA7,PSMB2,UBQLN1,TUBB2A,ATP5A1,PSMC2,ANXA11,PSMC6,PSMA1,ACTG1,ADRM1,PSMC3,PSMB3
HCT116	cell&exo	11	hsa05132	Salmonella infection	36	209	0.7	2.27e-12	9606.ENSP00000005257,9606.ENSP00000215832,9606.ENSP00000225655,9606.ENSP00000228825,9606.ENSP00000229239,9606.ENSP00000246792,9606.ENSP00000265062,9606.ENSP00000273047,9606.ENSP00000273130,9606.ENSP00000298316,9606.ENSP00000299767,9606.ENSP00000302486,9606.ENSP00000317332,9606.ENSP00000327145,9606.ENSP00000335153,9606.ENSP00000339467,9606.ENSP00000344456,9606.ENSP00000346032,9606.ENSP00000348965,…	RALA,MAPK1,PFN1,ARPC3,GAPDH,RRAS,RAB7A,RAB5A,DYNC1LI1,ARF6,HSP90B1,MAP2K1,SNX18,FLNC,HSP90AA1,RHOG,CTNNB1,ANXA2,DYNC1H1,NCKAP1,FLNA,HSP90AB1,ABI1,AHNAK,DNM2,SNX9,CDC42,ARPC4,ARPC1B,RHOA,FLNB,RAB5C,ACTG1,MYL12B,DYNLL2,CYFIP1
HCT116	cell&exo	12	hsa04520	Adherens junction	22	67	0.98	3.27e-12	9606.ENSP00000211998,9606.ENSP00000215832,9606.ENSP00000217244,9606.ENSP00000249071,9606.ENSP00000252699,9606.ENSP00000261769,9606.ENSP00000268182,9606.ENSP00000275493,9606.ENSP00000281537,9606.ENSP00000304283,9606.ENSP00000304669,9606.ENSP00000316338,9606.ENSP00000317272,9606.ENSP00000344456,9606.ENSP00000362680,9606.ENSP00000365042,9606.ENSP00000377941,9606.ENSP00000382004,9606.ENSP00000383118,…	VCL,MAPK1,CSNK2A1,RAC2,ACTN4,CDH1,IQGAP1,EGFR,TJP1,RAC3,CTNNA1,BAIAP2,MET,CTNNB1,SRC,CSNK2B,ACTN1,CTNND1,CDC42,RHOA,ACTG1,WASF2
HCT116	cell&exo	13	hsa04530	Tight junction	31	156	0.76	3.91e-12	9606.ENSP00000216181,9606.ENSP00000245932,9606.ENSP00000248437,9606.ENSP00000252699,9606.ENSP00000262613,9606.ENSP00000281537,9606.ENSP00000300935,9606.ENSP00000301071,9606.ENSP00000302961,9606.ENSP00000312734,9606.ENSP00000324804,9606.ENSP00000345731,9606.ENSP00000349486,9606.ENSP00000353408,9606.ENSP00000353590,9606.ENSP00000356042,9606.ENSP00000357005,9606.ENSP00000357564,9606.ENSP00000362680,…	MYH9,VASP,TUBA4A,ACTN4,SLC9A3R1,TJP1,RAB8A,TUBA1A,HSPA4,RAB8B,PPP2R1A,DLG1,SCRIB,MSN,MYH10,EZR,F11R,RAB13,SRC,ACTR2,PCNA,LLGL2,ACTN1,ITGB1,CDC42,NEDD4L,RDX,RHOA,MYL6,ACTG1,MYL12B
HCT116	cell&exo	14	hsa05130	Pathogenic Escherichia coli infection	33	187	0.71	1.1e-11	9606.ENSP00000215832,9606.ENSP00000216181,9606.ENSP00000228825,9606.ENSP00000229239,9606.ENSP00000248437,9606.ENSP00000262613,9606.ENSP00000264071,9606.ENSP00000281537,9606.ENSP00000298316,9606.ENSP00000301071,9606.ENSP00000316338,9606.ENSP00000318697,9606.ENSP00000320295,9606.ENSP00000324527,9606.ENSP00000339001,9606.ENSP00000340944,9606.ENSP00000341289,9606.ENSP00000353590,9606.ENSP00000354251,…	MAPK1,MYH9,ARPC3,GAPDH,TUBA4A,SLC9A3R1,TUBB4A,TJP1,ARF6,TUBA1A,BAIAP2,TUBB6,TUBB3,MYO1D,TUBB,PTPN11,TUBB4B,MYH10,NCKAP1,EZR,SRC,ABI1,TUBB2A,MYO1B,ITGB1,CDC42,ARPC4,ARPC1B,RHOA,GNA13,ACTG1,CYFIP1,WASF2
HCT116	cell&exo	15	hsa01230	Biosynthesis of amino acids	22	73	0.94	1.11e-11	9606.ENSP00000175506,9606.ENSP00000220966,9606.ENSP00000229239,9606.ENSP00000229270,9606.ENSP00000234590,9606.ENSP00000269848,9606.ENSP00000303147,9606.ENSP00000307188,9606.ENSP00000309477,9606.ENSP00000321259,9606.ENSP00000324105,9606.ENSP00000345771,9606.ENSP00000358417,9606.ENSP00000359539,9606.ENSP00000359991,9606.ENSP00000361471,9606.ENSP00000362413,9606.ENSP00000365773,9606.ENSP00000370517,…	ASNS,PYCRL,GAPDH,TPI1,ENO1,PFKL,MAT2A,ASL,ACO1,TALDO1,ENO3,PFKM,PHGDH,GOT1,PGAM1,ASS1,PGK1,PSAT1,PFKP,ALDOA,IDH1,TKT
HCT116	cell&exo	16	hsa05131	Shigellosis	34	218	0.65	9.21e-11	9606.ENSP00000211998,9606.ENSP00000215832,9606.ENSP00000225655,9606.ENSP00000228825,9606.ENSP00000246533,9606.ENSP00000252699,9606.ENSP00000254810,9606.ENSP00000264893,9606.ENSP00000275493,9606.ENSP00000295006,9606.ENSP00000298316,9606.ENSP00000316029,9606.ENSP00000316176,9606.ENSP00000341189,9606.ENSP00000362680,9606.ENSP00000367991,9606.ENSP00000377941,9606.ENSP00000379350,9606.ENSP00000379975,…	VCL,MAPK1,PFN1,ARPC3,CAPNS1,ACTN4,H3F3B,SEPT11,EGFR,CAPN2,ARF6,TLN1,UBE2N,PTK2,SRC,SEPT8,ACTN1,ITGB1,ILK,CDC42,ARPC4,ARPC1B,SEPT9,CD44,RHOA,UBE2V2,CAPN1,PLCB3,ACTG1,MYL12B,PLCD3,SEPT2,PLCG2,WASF2
HCT116	cell&exo	17	hsa05017	Spinocerebellar ataxia	27	135	0.76	9.85e-11	9606.ENSP00000044462,9606.ENSP00000157812,9606.ENSP00000216455,9606.ENSP00000219313,9606.ENSP00000223321,9606.ENSP00000259457,9606.ENSP00000261303,9606.ENSP00000261479,9606.ENSP00000261712,9606.ENSP00000264639,9606.ENSP00000270586,9606.ENSP00000271308,9606.ENSP00000290541,9606.ENSP00000309474,9606.ENSP00000310129,9606.ENSP00000310572,9606.ENSP00000348442,9606.ENSP00000359910,9606.ENSP00000362334,…	PSMA4,PSMC4,PSMA3,PSMD7,PSMA2,PSMB7,PSMC1,PSMA6,PSMD11,PSMD3,PSMB6,PSMA5,PSMB4,PSMD1,PSMD2,PSMC5,PSMD12,PSMA7,PSMB2,NOP56,PSMC2,PSMC6,PSMA1,PLCB3,ADRM1,PSMC3,PSMB3
HCT116	cell&exo	18	hsa05205	Proteoglycans in cancer	32	196	0.67	1.21e-10	9606.ENSP00000215832,9606.ENSP00000246792,9606.ENSP00000256078,9606.ENSP00000256196,9606.ENSP00000261023,9606.ENSP00000264657,9606.ENSP00000268182,9606.ENSP00000275493,9606.ENSP00000296181,9606.ENSP00000296585,9606.ENSP00000302486,9606.ENSP00000317272,9606.ENSP00000326031,9606.ENSP00000327145,9606.ENSP00000339740,9606.ENSP00000340944,9606.ENSP00000341189,9606.ENSP00000344456,9606.ENSP00000353408,…	MAPK1,RRAS,KRAS,RRAS2,ITGAV,STAT3,IQGAP1,EGFR,ITGB5,ITGA2,MAP2K1,MET,PPP1CA,FLNC,CAMK2D,PTPN11,PTK2,CTNNB1,MSN,EZR,FLNA,SRC,RPS6,PPP1CB,ITGB1,CDC42,RDX,CD44,RHOA,FLNB,ACTG1,PLCG2
HCT116	cell&exo	19	hsa05016	Huntington disease	39	298	0.58	2.63e-10	9606.ENSP00000044462,9606.ENSP00000157812,9606.ENSP00000216455,9606.ENSP00000219313,9606.ENSP00000223321,9606.ENSP00000248437,9606.ENSP00000259457,9606.ENSP00000261303,9606.ENSP00000261479,9606.ENSP00000261712,9606.ENSP00000262030,9606.ENSP00000264071,9606.ENSP00000264639,9606.ENSP00000270586,9606.ENSP00000271308,9606.ENSP00000290541,9606.ENSP00000301071,9606.ENSP00000307078,9606.ENSP00000309474,…	PSMA4,PSMC4,PSMA3,PSMD7,PSMA2,TUBA4A,PSMB7,PSMC1,PSMA6,PSMD11,ATP5B,TUBB4A,PSMD3,PSMB6,PSMA5,PSMB4,TUBA1A,KIF5B,PSMD1,PSMD2,PSMC5,TUBB6,TUBB3,TUBB,TUBB4B,PSMD12,PSMA7,PSMB2,TUBB2A,ATP5A1,PSMC2,PSMC6,PSMA1,PLCB3,ADRM1,CLTC,PSMC3,AP2B1,PSMB3
HCT116	cell&exo	20	hsa01200	Carbon metabolism	24	117	0.77	8.13e-10	9606.ENSP00000229239,9606.ENSP00000229270,9606.ENSP00000234590,9606.ENSP00000252603,9606.ENSP00000269848,9606.ENSP00000270776,9606.ENSP00000309477,9606.ENSP00000321259,9606.ENSP00000324105,9606.ENSP00000327070,9606.ENSP00000335304,9606.ENSP00000345771,9606.ENSP00000358417,9606.ENSP00000359539,9606.ENSP00000359991,9606.ENSP00000362413,9606.ENSP00000365773,9606.ENSP00000370517,9606.ENSP00000377192,…	GAPDH,TPI1,ENO1,PGLS,PFKL,PGD,ACO1,TALDO1,ENO3,MDH2,DLST,PFKM,PHGDH,GOT1,PGAM1,PGK1,PSAT1,PFKP,G6PD,ALDOA,IDH1,TKT,GPI,MDH1
HCT116	cell&exo	21	hsa04670	Leukocyte transendothelial migration	23	109	0.79	1.2e-09	9606.ENSP00000211998,9606.ENSP00000245932,9606.ENSP00000249071,9606.ENSP00000250559,9606.ENSP00000252699,9606.ENSP00000304669,9606.ENSP00000312999,9606.ENSP00000340944,9606.ENSP00000341189,9606.ENSP00000343027,9606.ENSP00000344456,9606.ENSP00000353408,9606.ENSP00000356042,9606.ENSP00000357005,9606.ENSP00000358867,9606.ENSP00000377941,9606.ENSP00000379350,9606.ENSP00000382004,9606.ENSP00000383118,…	VCL,VASP,RAC2,RAP1B,ACTN4,CTNNA1,GNAI2,PTPN11,PTK2,GNAI1,CTNNB1,MSN,EZR,F11R,GNAI3,ACTN1,ITGB1,CTNND1,CDC42,RHOA,ACTG1,MYL12B,PLCG2
HCT116	cell&exo	22	hsa04360	Axon guidance	28	177	0.66	3.96e-09	9606.ENSP00000215832,9606.ENSP00000246792,9606.ENSP00000249071,9606.ENSP00000256078,9606.ENSP00000298159,9606.ENSP00000304283,9606.ENSP00000309539,9606.ENSP00000312999,9606.ENSP00000317272,9606.ENSP00000339740,9606.ENSP00000340944,9606.ENSP00000341189,9606.ENSP00000343027,9606.ENSP00000351209,9606.ENSP00000355809,9606.ENSP00000358867,9606.ENSP00000362680,9606.ENSP00000363763,9606.ENSP00000379350,…	MAPK1,RRAS,RAC2,KRAS,CFL2,RAC3,DPYSL2,GNAI2,MET,CAMK2D,PTPN11,PTK2,GNAI1,EPHA2,ENAH,GNAI3,SRC,EPHB2,ITGB1,ILK,CDC42,RHOA,PLXNB2,CFL1,SRGAP2,MYL12B,PAK4,PLCG2
HCT116	cell&exo	23	hsa04145	Phagosome	25	142	0.71	4.85e-09	9606.ENSP00000219150,9606.ENSP00000248437,9606.ENSP00000261023,9606.ENSP00000261693,9606.ENSP00000264071,9606.ENSP00000265062,9606.ENSP00000273047,9606.ENSP00000273130,9606.ENSP00000273398,9606.ENSP00000276390,9606.ENSP00000296181,9606.ENSP00000296585,9606.ENSP00000301071,9606.ENSP00000318697,9606.ENSP00000320295,9606.ENSP00000331201,9606.ENSP00000339001,9606.ENSP00000341289,9606.ENSP00000348965,…	CORO1A,TUBA4A,ITGAV,SCARB1,TUBB4A,RAB7A,RAB5A,DYNC1LI1,ATP6V1A,ATP6V1B2,ITGB5,ITGA2,TUBA1A,TUBB6,TUBB3,HGS,TUBB,TUBB4B,DYNC1H1,TFRC,STX7,TUBB2A,ITGB1,RAB5C,ACTG1
HCT116	cell&exo	24	hsa04015	Rap1 signaling pathway	29	202	0.62	1.32e-08	9606.ENSP00000005257,9606.ENSP00000215832,9606.ENSP00000225655,9606.ENSP00000245932,9606.ENSP00000246792,9606.ENSP00000249071,9606.ENSP00000250559,9606.ENSP00000256078,9606.ENSP00000261769,9606.ENSP00000272298,9606.ENSP00000275493,9606.ENSP00000302486,9606.ENSP00000304283,9606.ENSP00000312999,9606.ENSP00000316029,9606.ENSP00000317272,9606.ENSP00000343027,9606.ENSP00000344456,9606.ENSP00000351209,…	RALA,MAPK1,PFN1,VASP,RRAS,RAC2,RAP1B,KRAS,CDH1,CALM2,EGFR,MAP2K1,RAC3,GNAI2,TLN1,MET,GNAI1,CTNNB1,EPHA2,ENAH,GNAI3,SRC,ITGB1,CTNND1,CDC42,PRKD2,RHOA,PLCB3,ACTG1
HCT116	cell&exo	25	hsa04540	Gap junction	19	87	0.8	2.75e-08	9606.ENSP00000078429,9606.ENSP00000215832,9606.ENSP00000248437,9606.ENSP00000256078,9606.ENSP00000264071,9606.ENSP00000275493,9606.ENSP00000281537,9606.ENSP00000301071,9606.ENSP00000302486,9606.ENSP00000312999,9606.ENSP00000318697,9606.ENSP00000320295,9606.ENSP00000339001,9606.ENSP00000341289,9606.ENSP00000343027,9606.ENSP00000358867,9606.ENSP00000362680,9606.ENSP00000369703,9606.ENSP00000443631	GNA11,MAPK1,TUBA4A,KRAS,TUBB4A,EGFR,TJP1,TUBA1A,MAP2K1,GNAI2,TUBB6,TUBB3,TUBB,TUBB4B,GNAI1,GNAI3,SRC,TUBB2A,PLCB3
HCT116	cell&exo	26	hsa05230	Central carbon metabolism in cancer	17	69	0.85	3.93e-08	9606.ENSP00000215832,9606.ENSP00000256078,9606.ENSP00000261622,9606.ENSP00000269848,9606.ENSP00000275493,9606.ENSP00000302486,9606.ENSP00000317272,9606.ENSP00000345771,9606.ENSP00000359991,9606.ENSP00000370517,9606.ENSP00000377192,9606.ENSP00000379386,9606.ENSP00000390265,9606.ENSP00000416293,9606.ENSP00000444408,9606.ENSP00000445175,9606.ENSP00000463978	MAPK1,KRAS,SLC7A5,PFKL,EGFR,MAP2K1,MET,PFKM,PGAM1,PFKP,G6PD,LDHB,IDH1,SLC2A1,SLC1A5,LDHA,SLC16A3
HCT116	cell&exo	27	hsa04066	HIF-1 signaling pathway	20	106	0.74	8.65e-08	9606.ENSP00000215832,9606.ENSP00000229239,9606.ENSP00000234590,9606.ENSP00000262306,9606.ENSP00000264657,9606.ENSP00000269848,9606.ENSP00000275493,9606.ENSP00000302486,9606.ENSP00000324105,9606.ENSP00000339740,9606.ENSP00000345771,9606.ENSP00000353224,9606.ENSP00000362413,9606.ENSP00000369757,9606.ENSP00000370517,9606.ENSP00000378669,9606.ENSP00000379386,9606.ENSP00000416293,9606.ENSP00000445175,…	MAPK1,GAPDH,ENO1,TCEB2,STAT3,PFKL,EGFR,MAP2K1,ENO3,CAMK2D,PFKM,TFRC,PGK1,RPS6,PFKP,ALDOA,LDHB,SLC2A1,LDHA,PLCG2
HCT116	cell&exo	28	hsa01100	Metabolic pathways	92	1447	0.26	3.65e-07	9606.ENSP00000175506,9606.ENSP00000196061,9606.ENSP00000216392,9606.ENSP00000216605,9606.ENSP00000216962,9606.ENSP00000217426,9606.ENSP00000220966,9606.ENSP00000222553,9606.ENSP00000226299,9606.ENSP00000229239,9606.ENSP00000229270,9606.ENSP00000232607,9606.ENSP00000234590,9606.ENSP00000236959,9606.ENSP00000252603,9606.ENSP00000253792,9606.ENSP00000255882,9606.ENSP00000256578,9606.ENSP00000257770,…	ASNS,PLOD1,PYGL,MTHFD1,PYGB,AHCY,PYCRL,NAMPT,LAP3,GAPDH,TPI1,UMPS,ENO1,ATIC,PGLS,ACLY,PI4KA,AMPD2,NT5E,ATP5B,P4HA1,CAD,PAPSS1,SORD,PMM2,PFKL,PGD,ATP6V1A,ATP6V1B2,AKR1B1,FUK,AGL,RRM1,MAT2A,DCXR,FASN,ASL,QARS,ACO1,PFAS,UGDH,TALDO1,IMPDH2,ENO3,CNDP2,MDH2,DLST,ISYNA1,UGP2,ACSL4,GANAB,PRDX6,PFKM,ALDH9A1,GFPT1,EPRS,UAP1,PHGDH,GSTO1,GOT1,PGAM1,AKR1A1,ASS1,PGK1,PSAT1,SRM,APRT,MTAP,PFKP,GART,NME1-NME2,G6P…
HCT116	cell&exo	29	hsa00010	Glycolysis / Gluconeogenesis	15	65	0.82	6.3e-07	9606.ENSP00000229239,9606.ENSP00000229270,9606.ENSP00000234590,9606.ENSP00000269848,9606.ENSP00000324105,9606.ENSP00000345771,9606.ENSP00000346827,9606.ENSP00000359991,9606.ENSP00000361140,9606.ENSP00000362413,9606.ENSP00000370517,9606.ENSP00000378669,9606.ENSP00000379386,9606.ENSP00000405573,9606.ENSP00000445175	GAPDH,TPI1,ENO1,PFKL,ENO3,PFKM,ALDH9A1,PGAM1,AKR1A1,PGK1,PFKP,ALDOA,LDHB,GPI,LDHA
HCT116	cell&exo	30	hsa05200	Pathways in cancer	44	517	0.39	1.74e-06	9606.ENSP00000005257,9606.ENSP00000007722,9606.ENSP00000078429,9606.ENSP00000215832,9606.ENSP00000222399,9606.ENSP00000249071,9606.ENSP00000252999,9606.ENSP00000256078,9606.ENSP00000258341,9606.ENSP00000261023,9606.ENSP00000261769,9606.ENSP00000262306,9606.ENSP00000264657,9606.ENSP00000272298,9606.ENSP00000275493,9606.ENSP00000290921,9606.ENSP00000296585,9606.ENSP00000299767,9606.ENSP00000302486,…	RALA,ITGA3,GNA11,MAPK1,LAMB1,RAC2,LAMA5,KRAS,LAMC1,ITGAV,CDH1,TCEB2,STAT3,CALM2,EGFR,CTBP1,ITGA2,HSP90B1,MAP2K1,RAC3,CTNNA1,GNAI2,MET,HSP90AA1,CAMK2D,PTK2,GNAI1,CTNNB1,STAT1,TPM3,GSTO1,GNAI3,GNG12,HSP90AB1,JUP,ITGB1,CDC42,ITGA6,RHOA,GNA13,SLC2A1,PLCB3,GNB1,PLCG2
HCT116	cell&exo	31	hsa04611	Platelet activation	19	122	0.65	2.63e-06	9606.ENSP00000215832,9606.ENSP00000245932,9606.ENSP00000250559,9606.ENSP00000296585,9606.ENSP00000312999,9606.ENSP00000316029,9606.ENSP00000326031,9606.ENSP00000343027,9606.ENSP00000358867,9606.ENSP00000362680,9606.ENSP00000378769,9606.ENSP00000379350,9606.ENSP00000400175,9606.ENSP00000400717,9606.ENSP00000428924,9606.ENSP00000443631,9606.ENSP00000458162,9606.ENSP00000463559,9606.ENSP00000482457	MAPK1,VASP,RAP1B,ITGA2,GNAI2,TLN1,PPP1CA,GNAI1,GNAI3,SRC,PPP1CB,ITGB1,RHOA,GNA13,LYN,PLCB3,ACTG1,MYL12B,PLCG2
HCT116	cell&exo	32	hsa00970	Aminoacyl-tRNA biosynthesis	12	44	0.9	2.66e-06	9606.ENSP00000231572,9606.ENSP00000234677,9606.ENSP00000261772,9606.ENSP00000264161,9606.ENSP00000281828,9606.ENSP00000307567,9606.ENSP00000347495,9606.ENSP00000355890,9606.ENSP00000364794,9606.ENSP00000364815,9606.ENSP00000373918,9606.ENSP00000387710	RARS,SARS,AARS,DARS,FARSB,QARS,WARS,EPRS,IARS,VARS,GARS,TARS
HCT116	cell&exo	33	hsa00030	Pentose phosphate pathway	10	29	1	4.35e-06	9606.ENSP00000252603,9606.ENSP00000269848,9606.ENSP00000270776,9606.ENSP00000321259,9606.ENSP00000345771,9606.ENSP00000370517,9606.ENSP00000377192,9606.ENSP00000378669,9606.ENSP00000391481,9606.ENSP00000405573	PGLS,PFKL,PGD,TALDO1,PFKM,PFKP,G6PD,ALDOA,TKT,GPI
HCT116	cell&exo	34	hsa00270	Cysteine and methionine metabolism	12	49	0.85	6.71e-06	9606.ENSP00000217426,9606.ENSP00000303147,9606.ENSP00000327070,9606.ENSP00000358417,9606.ENSP00000359539,9606.ENSP00000365773,9606.ENSP00000366156,9606.ENSP00000369519,9606.ENSP00000379386,9606.ENSP00000380402,9606.ENSP00000438144,9606.ENSP00000445175	AHCY,MAT2A,MDH2,PHGDH,GOT1,PSAT1,SRM,MTAP,LDHB,MPST,MDH1,LDHA
HCT116	cell&exo	35	hsa05203	Viral carcinogenesis	22	182	0.54	1.35e-05	9606.ENSP00000215832,9606.ENSP00000244537,9606.ENSP00000248975,9606.ENSP00000252699,9606.ENSP00000256078,9606.ENSP00000261303,9606.ENSP00000264335,9606.ENSP00000264657,9606.ENSP00000306330,9606.ENSP00000345731,9606.ENSP00000346762,9606.ENSP00000349486,9606.ENSP00000361930,9606.ENSP00000362680,9606.ENSP00000364403,9606.ENSP00000371267,9606.ENSP00000377941,9606.ENSP00000379287,9606.ENSP00000382840,…	MAPK1,HIST1H4F,YWHAH,ACTN4,KRAS,PSMC1,YWHAE,STAT3,YWHAG,DLG1,SND1,SCRIB,YWHAB,SRC,UBR4,YWHAQ,ACTN1,YWHAZ,DDX3X,CDC42,RHOA,LYN
HCT116	cell&exo	36	hsa04151	PI3K-Akt signaling pathway	32	350	0.42	1.83e-05	9606.ENSP00000007722,9606.ENSP00000200181,9606.ENSP00000215832,9606.ENSP00000222005,9606.ENSP00000222399,9606.ENSP00000248975,9606.ENSP00000252999,9606.ENSP00000256078,9606.ENSP00000258341,9606.ENSP00000261023,9606.ENSP00000264335,9606.ENSP00000275493,9606.ENSP00000296181,9606.ENSP00000296585,9606.ENSP00000299767,9606.ENSP00000302486,9606.ENSP00000306330,9606.ENSP00000317272,9606.ENSP00000324804,…	ITGA3,ITGB4,MAPK1,CDC37,LAMB1,YWHAH,LAMA5,KRAS,LAMC1,ITGAV,YWHAE,EGFR,ITGB5,ITGA2,HSP90B1,MAP2K1,YWHAG,MET,PPP2R1A,HSP90AA1,PTK2,EPHA2,COL6A1,GNG12,HSP90AB1,YWHAB,RPS6,YWHAQ,YWHAZ,ITGB1,ITGA6,GNB1
HCT116	cell&exo	37	hsa04666	Fc gamma R-mediated phagocytosis	15	90	0.68	1.92e-05	9606.ENSP00000215832,9606.ENSP00000228825,9606.ENSP00000245932,9606.ENSP00000249071,9606.ENSP00000298159,9606.ENSP00000298316,9606.ENSP00000302486,9606.ENSP00000373905,9606.ENSP00000383118,9606.ENSP00000388169,9606.ENSP00000389631,9606.ENSP00000428924,9606.ENSP00000432660,9606.ENSP00000482457,9606.ENSP00000483313	MAPK1,ARPC3,VASP,RAC2,CFL2,ARF6,MAP2K1,DNM2,CDC42,ARPC4,ARPC1B,LYN,CFL1,PLCG2,WASF2
HCT116	cell&exo	38	hsa05165	Human papillomavirus infection	30	325	0.43	3.02e-05	9606.ENSP00000007722,9606.ENSP00000200181,9606.ENSP00000215832,9606.ENSP00000222399,9606.ENSP00000251413,9606.ENSP00000252999,9606.ENSP00000256078,9606.ENSP00000258341,9606.ENSP00000261023,9606.ENSP00000261303,9606.ENSP00000262613,9606.ENSP00000273398,9606.ENSP00000275493,9606.ENSP00000276390,9606.ENSP00000296181,9606.ENSP00000296585,9606.ENSP00000302486,9606.ENSP00000324804,9606.ENSP00000341189,…	ITGA3,ITGB4,MAPK1,LAMB1,TUBG1,LAMA5,KRAS,LAMC1,ITGAV,PSMC1,SLC9A3R1,ATP6V1A,EGFR,ATP6V1B2,ITGB5,ITGA2,MAP2K1,PPP2R1A,PTK2,CTNNB1,DLG1,SCRIB,STAT1,COL6A1,UBR4,LLGL2,ITGB1,CDC42,ITGA6,BCAP31
HCT116	cell&exo	39	hsa04141	Protein processing in endoplasmic reticulum	20	165	0.55	3.49e-05	9606.ENSP00000256383,9606.ENSP00000295006,9606.ENSP00000299767,9606.ENSP00000300289,9606.ENSP00000314030,9606.ENSP00000318687,9606.ENSP00000324173,9606.ENSP00000327801,9606.ENSP00000335153,9606.ENSP00000340466,9606.ENSP00000351777,9606.ENSP00000360609,9606.ENSP00000364801,9606.ENSP00000365576,9606.ENSP00000369127,9606.ENSP00000378721,9606.ENSP00000392330,9606.ENSP00000431984,9606.ENSP00000432083,…	EIF2S1,CAPN2,HSP90B1,PDIA3,DNAJA2,HSPH1,HSPA5,P4HB,HSP90AA1,GANAB,VCP,HSP90AB1,HSPA1B,UBQLN1,DNAJA1,SEC31A,BCAP31,CAPN1,HSPA8,HYOU1
HCT116	cell&exo	40	hsa00051	Fructose and mannose metabolism	9	32	0.91	5.53e-05	9606.ENSP00000229270,9606.ENSP00000267814,9606.ENSP00000268261,9606.ENSP00000269848,9606.ENSP00000285930,9606.ENSP00000288078,9606.ENSP00000345771,9606.ENSP00000370517,9606.ENSP00000378669	TPI1,SORD,PMM2,PFKL,AKR1B1,FUK,PFKM,PFKP,ALDOA
HCT116	cell&exo	41	hsa05034	Alcoholism	18	144	0.56	6.81e-05	9606.ENSP00000215832,9606.ENSP00000244537,9606.ENSP00000254810,9606.ENSP00000256078,9606.ENSP00000272298,9606.ENSP00000302486,9606.ENSP00000312999,9606.ENSP00000326031,9606.ENSP00000332194,9606.ENSP00000343027,9606.ENSP00000355656,9606.ENSP00000358867,9606.ENSP00000360021,9606.ENSP00000362352,9606.ENSP00000377424,9606.ENSP00000378769,9606.ENSP00000423563,9606.ENSP00000481878	MAPK1,HIST1H4F,H3F3B,KRAS,CALM2,MAP2K1,GNAI2,PPP1CA,HIST2H2AC,GNAI1,HIST3H2A,GNAI3,GNG12,H2AFY2,SLC29A1,PPP1CB,H2AFY,GNB1
HCT116	cell&exo	42	hsa04014	Ras signaling pathway	23	226	0.47	9.03e-05	9606.ENSP00000005257,9606.ENSP00000215832,9606.ENSP00000246792,9606.ENSP00000249071,9606.ENSP00000250559,9606.ENSP00000256078,9606.ENSP00000256196,9606.ENSP00000272298,9606.ENSP00000273047,9606.ENSP00000275493,9606.ENSP00000298316,9606.ENSP00000302486,9606.ENSP00000304283,9606.ENSP00000317272,9606.ENSP00000340944,9606.ENSP00000351209,9606.ENSP00000360021,9606.ENSP00000383118,9606.ENSP00000400175,…	RALA,MAPK1,RRAS,RAC2,RAP1B,KRAS,RRAS2,CALM2,RAB5A,EGFR,ARF6,MAP2K1,RAC3,MET,PTPN11,EPHA2,GNG12,CDC42,RHOA,RAB5C,PAK4,GNB1,PLCG2
HCT116	cell&exo	43	hsa04919	Thyroid hormone signaling pathway	16	119	0.59	9.03e-05	9606.ENSP00000215832,9606.ENSP00000256078,9606.ENSP00000261023,9606.ENSP00000269848,9606.ENSP00000302486,9606.ENSP00000344456,9606.ENSP00000345771,9606.ENSP00000354394,9606.ENSP00000362680,9606.ENSP00000370517,9606.ENSP00000416293,9606.ENSP00000443631,9606.ENSP00000445306,9606.ENSP00000458162,9606.ENSP00000479636,9606.ENSP00000482457	MAPK1,KRAS,ITGAV,PFKL,MAP2K1,CTNNB1,PFKM,STAT1,SRC,PFKP,SLC2A1,PLCB3,ATP1A1,ACTG1,PLCD3,PLCG2
HCT116	cell&exo	44	hsa05120	Epithelial cell signaling in Helicobacter pylori infection	12	67	0.71	9.03e-05	9606.ENSP00000260408,9606.ENSP00000273398,9606.ENSP00000275493,9606.ENSP00000276390,9606.ENSP00000281537,9606.ENSP00000317272,9606.ENSP00000340944,9606.ENSP00000357005,9606.ENSP00000362680,9606.ENSP00000383118,9606.ENSP00000428924,9606.ENSP00000482457	ADAM10,ATP6V1A,EGFR,ATP6V1B2,TJP1,MET,PTPN11,F11R,SRC,CDC42,LYN,PLCG2
HCT116	cell&exo	45	hsa04217	Necroptosis	18	149	0.54	9.47e-05	9606.ENSP00000216392,9606.ENSP00000216962,9606.ENSP00000217402,9606.ENSP00000254950,9606.ENSP00000264657,9606.ENSP00000273550,9606.ENSP00000295006,9606.ENSP00000324205,9606.ENSP00000332194,9606.ENSP00000335153,9606.ENSP00000339740,9606.ENSP00000354394,9606.ENSP00000355656,9606.ENSP00000360609,9606.ENSP00000362352,9606.ENSP00000423563,9606.ENSP00000431984,9606.ENSP00000449089	PYGL,PYGB,CHMP4B,VPS4A,STAT3,FTH1,CAPN2,CHMP4A,HIST2H2AC,HSP90AA1,CAMK2D,STAT1,HIST3H2A,HSP90AB1,H2AFY2,H2AFY,CAPN1,DNM1L
HCT116	cell&exo	46	hsa04062	Chemokine signaling pathway	20	186	0.49	0.00014	9606.ENSP00000215832,9606.ENSP00000249071,9606.ENSP00000250559,9606.ENSP00000256078,9606.ENSP00000264657,9606.ENSP00000302486,9606.ENSP00000304283,9606.ENSP00000312999,9606.ENSP00000341189,9606.ENSP00000343027,9606.ENSP00000354394,9606.ENSP00000358867,9606.ENSP00000360021,9606.ENSP00000362680,9606.ENSP00000383118,9606.ENSP00000400175,9606.ENSP00000428924,9606.ENSP00000443631,9606.ENSP00000481878,…	MAPK1,RAC2,RAP1B,KRAS,STAT3,MAP2K1,RAC3,GNAI2,PTK2,GNAI1,STAT1,GNAI3,GNG12,SRC,CDC42,RHOA,LYN,PLCB3,GNB1,PLCG2
HCT116	cell&exo	47	hsa04730	Long-term depression	11	59	0.73	0.00014	9606.ENSP00000078429,9606.ENSP00000215832,9606.ENSP00000256078,9606.ENSP00000302486,9606.ENSP00000312999,9606.ENSP00000324804,9606.ENSP00000343027,9606.ENSP00000358867,9606.ENSP00000400717,9606.ENSP00000428924,9606.ENSP00000443631	GNA11,MAPK1,KRAS,MAP2K1,GNAI2,PPP2R1A,GNAI1,GNAI3,GNA13,LYN,PLCB3
HCT116	cell&exo	48	hsa05135	Yersinia infection	16	125	0.57	0.00014	9606.ENSP00000215832,9606.ENSP00000249071,9606.ENSP00000298316,9606.ENSP00000302486,9606.ENSP00000304283,9606.ENSP00000316338,9606.ENSP00000339467,9606.ENSP00000341189,9606.ENSP00000362680,9606.ENSP00000367220,9606.ENSP00000368884,9606.ENSP00000379350,9606.ENSP00000383118,9606.ENSP00000400175,9606.ENSP00000458162,9606.ENSP00000483313	MAPK1,RAC2,ARF6,MAP2K1,RAC3,BAIAP2,RHOG,PTK2,SRC,ACTR2,RPS6KA3,ITGB1,CDC42,RHOA,ACTG1,WASF2
HCT116	cell&exo	49	hsa05163	Human cytomegalovirus infection	22	218	0.47	0.00014	9606.ENSP00000078429,9606.ENSP00000215832,9606.ENSP00000249071,9606.ENSP00000256078,9606.ENSP00000261023,9606.ENSP00000264657,9606.ENSP00000272298,9606.ENSP00000275493,9606.ENSP00000300289,9606.ENSP00000302486,9606.ENSP00000304283,9606.ENSP00000312999,9606.ENSP00000341189,9606.ENSP00000343027,9606.ENSP00000344456,9606.ENSP00000358867,9606.ENSP00000360021,9606.ENSP00000362680,9606.ENSP00000400175,…	GNA11,MAPK1,RAC2,KRAS,ITGAV,STAT3,CALM2,EGFR,PDIA3,MAP2K1,RAC3,GNAI2,PTK2,GNAI1,CTNNB1,GNAI3,GNG12,SRC,RHOA,GNA13,PLCB3,GNB1
HCT116	cell&exo	50	hsa05170	Human immunodeficiency virus 1 infection	21	204	0.47	0.00015	9606.ENSP00000078429,9606.ENSP00000215832,9606.ENSP00000249071,9606.ENSP00000250244,9606.ENSP00000256078,9606.ENSP00000262306,9606.ENSP00000262878,9606.ENSP00000272298,9606.ENSP00000298159,9606.ENSP00000300289,9606.ENSP00000302486,9606.ENSP00000304283,9606.ENSP00000312999,9606.ENSP00000341189,9606.ENSP00000343027,9606.ENSP00000358867,9606.ENSP00000360021,9606.ENSP00000432660,9606.ENSP00000469413,…	GNA11,MAPK1,RAC2,AP1M2,KRAS,TCEB2,SAMHD1,CALM2,CFL2,PDIA3,MAP2K1,RAC3,GNAI2,PTK2,GNAI1,GNAI3,GNG12,CFL1,PAK4,GNB1,PLCG2
HCT116	cell&exo	51	hsa05146	Amoebiasis	14	100	0.61	0.00018	9606.ENSP00000078429,9606.ENSP00000211998,9606.ENSP00000222399,9606.ENSP00000248553,9606.ENSP00000252699,9606.ENSP00000252999,9606.ENSP00000258341,9606.ENSP00000265062,9606.ENSP00000273047,9606.ENSP00000341189,9606.ENSP00000377941,9606.ENSP00000443631,9606.ENSP00000447053,9606.ENSP00000484343	GNA11,VCL,LAMB1,HSPB1,ACTN4,LAMA5,LAMC1,RAB7A,RAB5A,PTK2,ACTN1,PLCB3,RAB5C,SERPINB6
HCT116	cell&exo	52	hsa04921	Oxytocin signaling pathway	17	149	0.52	0.00027	9606.ENSP00000215832,9606.ENSP00000256078,9606.ENSP00000272298,9606.ENSP00000275493,9606.ENSP00000302486,9606.ENSP00000307940,9606.ENSP00000312999,9606.ENSP00000326031,9606.ENSP00000339740,9606.ENSP00000343027,9606.ENSP00000358867,9606.ENSP00000362680,9606.ENSP00000378769,9606.ENSP00000400175,9606.ENSP00000443631,9606.ENSP00000446955,9606.ENSP00000458162	MAPK1,KRAS,CALM2,EGFR,MAP2K1,EEF2,GNAI2,PPP1CA,CAMK2D,GNAI1,GNAI3,SRC,PPP1CB,RHOA,PLCB3,MYL6,ACTG1
HCT116	cell&exo	53	hsa04370	VEGF signaling pathway	10	57	0.71	0.00045	9606.ENSP00000215832,9606.ENSP00000248553,9606.ENSP00000249071,9606.ENSP00000256078,9606.ENSP00000302486,9606.ENSP00000304283,9606.ENSP00000341189,9606.ENSP00000362680,9606.ENSP00000383118,9606.ENSP00000482457	MAPK1,HSPB1,RAC2,KRAS,MAP2K1,RAC3,PTK2,SRC,CDC42,PLCG2
HCT116	cell&exo	54	hsa05160	Hepatitis C	17	156	0.5	0.00045	9606.ENSP00000215832,9606.ENSP00000220849,9606.ENSP00000248975,9606.ENSP00000256078,9606.ENSP00000256383,9606.ENSP00000261693,9606.ENSP00000264335,9606.ENSP00000264657,9606.ENSP00000275493,9606.ENSP00000302486,9606.ENSP00000306330,9606.ENSP00000324804,9606.ENSP00000344456,9606.ENSP00000354394,9606.ENSP00000361930,9606.ENSP00000371267,9606.ENSP00000379287	MAPK1,EIF3E,YWHAH,KRAS,EIF2S1,SCARB1,YWHAE,STAT3,EGFR,MAP2K1,YWHAG,PPP2R1A,CTNNB1,STAT1,YWHAB,YWHAQ,YWHAZ
HCT116	cell&exo	55	hsa00520	Amino sugar and nucleotide sugar metabolism	9	46	0.75	0.00048	9606.ENSP00000268261,9606.ENSP00000288078,9606.ENSP00000319501,9606.ENSP00000338703,9606.ENSP00000349860,9606.ENSP00000354468,9606.ENSP00000356903,9606.ENSP00000405573,9606.ENSP00000425809	PMM2,FUK,UGDH,UGP2,GFPT1,CYB5R3,UAP1,GPI,PGM3
HCT116	cell&exo	56	hsa03013	RNA transport	17	160	0.49	0.00057	9606.ENSP00000216190,9606.ENSP00000220849,9606.ENSP00000253039,9606.ENSP00000256383,9606.ENSP00000269349,9606.ENSP00000290158,9606.ENSP00000293831,9606.ENSP00000313007,9606.ENSP00000319169,9606.ENSP00000354125,9606.ENSP00000358140,9606.ENSP00000362688,9606.ENSP00000416255,9606.ENSP00000431800,9606.ENSP00000446215,9606.ENSP00000470142,9606.ENSP00000481038	EIF3D,EIF3E,EIF2S3,EIF2S1,EIF4A3,KPNB1,EIF4A1,PABPC1,PRMT5,EIF3B,EIF3A,EIF3I,EIF4G1,EIF3F,RAN,UPF1,CYFIP1
HCT116	cell&exo	57	hsa05169	Epstein-Barr virus infection	19	193	0.45	0.00057	9606.ENSP00000157812,9606.ENSP00000219313,9606.ENSP00000261303,9606.ENSP00000261712,9606.ENSP00000264639,9606.ENSP00000264657,9606.ENSP00000300289,9606.ENSP00000309474,9606.ENSP00000310129,9606.ENSP00000310572,9606.ENSP00000348442,9606.ENSP00000354394,9606.ENSP00000391211,9606.ENSP00000398632,9606.ENSP00000401802,9606.ENSP00000428924,9606.ENSP00000478877,9606.ENSP00000481029,9606.ENSP00000482457	PSMC4,PSMD7,PSMC1,PSMD11,PSMD3,STAT3,PDIA3,PSMD1,PSMD2,PSMC5,PSMD12,STAT1,PSMC2,CD44,PSMC6,LYN,ADRM1,PSMC3,PLCG2
HCT116	cell&exo	58	hsa04371	Apelin signaling pathway	15	131	0.52	0.00065	9606.ENSP00000215832,9606.ENSP00000246792,9606.ENSP00000256078,9606.ENSP00000256196,9606.ENSP00000261769,9606.ENSP00000272298,9606.ENSP00000302486,9606.ENSP00000312999,9606.ENSP00000343027,9606.ENSP00000358867,9606.ENSP00000360021,9606.ENSP00000369757,9606.ENSP00000400717,9606.ENSP00000443631,9606.ENSP00000481878	MAPK1,RRAS,KRAS,RRAS2,CDH1,CALM2,MAP2K1,GNAI2,GNAI1,GNAI3,GNG12,RPS6,GNA13,PLCB3,GNB1
HCT116	cell&exo	59	hsa04922	Glucagon signaling pathway	13	101	0.57	0.00065	9606.ENSP00000216392,9606.ENSP00000216962,9606.ENSP00000269848,9606.ENSP00000272298,9606.ENSP00000339740,9606.ENSP00000345771,9606.ENSP00000359991,9606.ENSP00000370517,9606.ENSP00000379386,9606.ENSP00000406162,9606.ENSP00000416293,9606.ENSP00000443631,9606.ENSP00000445175	PYGL,PYGB,PFKL,CALM2,CAMK2D,PFKM,PGAM1,PFKP,LDHB,PRMT1,SLC2A1,PLCB3,LDHA
HCT116	cell&exo	60	hsa04512	ECM-receptor interaction	12	88	0.6	0.0007	9606.ENSP00000007722,9606.ENSP00000200181,9606.ENSP00000222399,9606.ENSP00000252999,9606.ENSP00000258341,9606.ENSP00000261023,9606.ENSP00000296181,9606.ENSP00000296585,9606.ENSP00000355180,9606.ENSP00000379350,9606.ENSP00000386896,9606.ENSP00000398632	ITGA3,ITGB4,LAMB1,LAMA5,LAMC1,ITGAV,ITGB5,ITGA2,COL6A1,ITGB1,ITGA6,CD44
HCT116	cell&exo	61	hsa04915	Estrogen signaling pathway	15	133	0.51	0.00073	9606.ENSP00000215832,9606.ENSP00000256078,9606.ENSP00000272298,9606.ENSP00000275493,9606.ENSP00000299767,9606.ENSP00000302486,9606.ENSP00000312999,9606.ENSP00000335153,9606.ENSP00000343027,9606.ENSP00000358867,9606.ENSP00000360609,9606.ENSP00000362680,9606.ENSP00000364801,9606.ENSP00000432083,9606.ENSP00000443631	MAPK1,KRAS,CALM2,EGFR,HSP90B1,MAP2K1,GNAI2,HSP90AA1,GNAI1,GNAI3,HSP90AB1,SRC,HSPA1B,HSPA8,PLCB3
HCT116	cell&exo	62	hsa05412	Arrhythmogenic right ventricular cardiomyopathy	11	76	0.62	0.0008	9606.ENSP00000007722,9606.ENSP00000200181,9606.ENSP00000261023,9606.ENSP00000296181,9606.ENSP00000296585,9606.ENSP00000304669,9606.ENSP00000344456,9606.ENSP00000377508,9606.ENSP00000379350,9606.ENSP00000386896,9606.ENSP00000458162	ITGA3,ITGB4,ITGAV,ITGB5,ITGA2,CTNNA1,CTNNB1,JUP,ITGB1,ITGA6,ACTG1
HCT116	cell&exo	63	hsa04114	Oocyte meiosis	14	120	0.53	0.00085	9606.ENSP00000215832,9606.ENSP00000248975,9606.ENSP00000264335,9606.ENSP00000272298,9606.ENSP00000302486,9606.ENSP00000306330,9606.ENSP00000324804,9606.ENSP00000326031,9606.ENSP00000339740,9606.ENSP00000361930,9606.ENSP00000368884,9606.ENSP00000371267,9606.ENSP00000378769,9606.ENSP00000379287	MAPK1,YWHAH,YWHAE,CALM2,MAP2K1,YWHAG,PPP2R1A,PPP1CA,CAMK2D,YWHAB,RPS6KA3,YWHAQ,PPP1CB,YWHAZ
HCT116	cell&exo	64	hsa05145	Toxoplasmosis	13	105	0.55	0.00085	9606.ENSP00000215832,9606.ENSP00000222399,9606.ENSP00000252999,9606.ENSP00000258341,9606.ENSP00000264657,9606.ENSP00000312999,9606.ENSP00000343027,9606.ENSP00000354394,9606.ENSP00000358867,9606.ENSP00000364801,9606.ENSP00000379350,9606.ENSP00000386896,9606.ENSP00000432083	MAPK1,LAMB1,LAMA5,LAMC1,STAT3,GNAI2,GNAI1,STAT1,GNAI3,HSPA1B,ITGB1,ITGA6,HSPA8
HCT116	cell&exo	65	hsa04720	Long-term potentiation	10	64	0.66	0.00087	9606.ENSP00000215832,9606.ENSP00000250559,9606.ENSP00000256078,9606.ENSP00000272298,9606.ENSP00000302486,9606.ENSP00000326031,9606.ENSP00000339740,9606.ENSP00000368884,9606.ENSP00000378769,9606.ENSP00000443631	MAPK1,RAP1B,KRAS,CALM2,MAP2K1,PPP1CA,CAMK2D,RPS6KA3,PPP1CB,PLCB3
HCT116	cell&exo	66	hsa04390	Hippo signaling pathway	16	153	0.48	0.00091	9606.ENSP00000248975,9606.ENSP00000261769,9606.ENSP00000264335,9606.ENSP00000304669,9606.ENSP00000306330,9606.ENSP00000324804,9606.ENSP00000326031,9606.ENSP00000344456,9606.ENSP00000345731,9606.ENSP00000349486,9606.ENSP00000361930,9606.ENSP00000371267,9606.ENSP00000376333,9606.ENSP00000378769,9606.ENSP00000379287,9606.ENSP00000458162	YWHAH,CDH1,YWHAE,CTNNA1,YWHAG,PPP2R1A,PPP1CA,CTNNB1,DLG1,SCRIB,YWHAB,YWHAQ,LLGL2,PPP1CB,YWHAZ,ACTG1
HCT116	cell&exo	67	hsa05211	Renal cell carcinoma	10	66	0.64	0.0011	9606.ENSP00000215832,9606.ENSP00000250559,9606.ENSP00000256078,9606.ENSP00000262306,9606.ENSP00000302486,9606.ENSP00000317272,9606.ENSP00000340944,9606.ENSP00000383118,9606.ENSP00000416293,9606.ENSP00000469413	MAPK1,RAP1B,KRAS,TCEB2,MAP2K1,MET,PTPN11,CDC42,SLC2A1,PAK4
HCT116	cell&exo	68	hsa05206	MicroRNAs in cancer	16	160	0.46	0.0014	9606.ENSP00000215832,9606.ENSP00000256078,9606.ENSP00000260363,9606.ENSP00000264657,9606.ENSP00000275493,9606.ENSP00000278742,9606.ENSP00000302486,9606.ENSP00000317272,9606.ENSP00000356042,9606.ENSP00000371798,9606.ENSP00000382342,9606.ENSP00000384136,9606.ENSP00000398632,9606.ENSP00000400175,9606.ENSP00000469413,9606.ENSP00000482457	MAPK1,KRAS,KIF23,STAT3,EGFR,ST14,MAP2K1,MET,EZR,FSCN1,ABCC1,RDX,CD44,RHOA,PAK4,PLCG2
HCT116	cell&exo	69	hsa04962	Vasopressin-regulated water reabsorption	8	44	0.72	0.0015	9606.ENSP00000261890,9606.ENSP00000269321,9606.ENSP00000273047,9606.ENSP00000273130,9606.ENSP00000348965,9606.ENSP00000381293,9606.ENSP00000447053,9606.ENSP00000477310	RAB11A,ARHGDIA,RAB5A,DYNC1LI1,DYNC1H1,NSF,RAB5C,DYNLL2
HCT116	cell&exo	70	hsa04022	cGMP-PKG signaling pathway	16	162	0.46	0.0016	9606.ENSP00000078429,9606.ENSP00000215832,9606.ENSP00000245932,9606.ENSP00000272298,9606.ENSP00000302486,9606.ENSP00000312999,9606.ENSP00000326031,9606.ENSP00000343027,9606.ENSP00000350310,9606.ENSP00000358867,9606.ENSP00000378769,9606.ENSP00000392043,9606.ENSP00000400175,9606.ENSP00000400717,9606.ENSP00000443631,9606.ENSP00000445306	GNA11,MAPK1,VASP,CALM2,MAP2K1,GNAI2,PPP1CA,GNAI1,ATP2B4,GNAI3,PPP1CB,ATP2B1,RHOA,GNA13,PLCB3,ATP1A1
HCT116	cell&exo	71	hsa04722	Neurotrophin signaling pathway	13	114	0.52	0.0016	9606.ENSP00000215832,9606.ENSP00000250559,9606.ENSP00000256078,9606.ENSP00000264335,9606.ENSP00000269321,9606.ENSP00000272298,9606.ENSP00000302486,9606.ENSP00000339740,9606.ENSP00000340944,9606.ENSP00000368884,9606.ENSP00000383118,9606.ENSP00000400175,9606.ENSP00000482457	MAPK1,RAP1B,KRAS,YWHAE,ARHGDIA,CALM2,MAP2K1,CAMK2D,PTPN11,RPS6KA3,CDC42,RHOA,PLCG2
HCT116	cell&exo	72	hsa05418	Fluid shear stress and atherosclerosis	14	130	0.49	0.0016	9606.ENSP00000249071,9606.ENSP00000261023,9606.ENSP00000272298,9606.ENSP00000299767,9606.ENSP00000304283,9606.ENSP00000335153,9606.ENSP00000341189,9606.ENSP00000344456,9606.ENSP00000358727,9606.ENSP00000360609,9606.ENSP00000361471,9606.ENSP00000362680,9606.ENSP00000400175,9606.ENSP00000458162	RAC2,ITGAV,CALM2,HSP90B1,RAC3,HSP90AA1,PTK2,CTNNB1,GSTO1,HSP90AB1,ASS1,SRC,RHOA,ACTG1
HCT116	cell&exo	73	hsa03040	Spliceosome	14	132	0.49	0.0018	9606.ENSP00000215829,9606.ENSP00000244020,9606.ENSP00000258962,9606.ENSP00000269349,9606.ENSP00000283179,9606.ENSP00000305556,9606.ENSP00000325376,9606.ENSP00000325905,9606.ENSP00000336741,9606.ENSP00000364801,9606.ENSP00000392094,9606.ENSP00000432083,9606.ENSP00000451291,9606.ENSP00000460348	SNRPD3,SRSF6,SRSF1,EIF4A3,HNRNPU,PCBP1,HNRNPM,SRSF7,DHX15,HSPA1B,EFTUD2,HSPA8,HNRNPC,PRPF8
HCT116	cell&exo	74	hsa04071	Sphingolipid signaling pathway	13	116	0.51	0.0018	9606.ENSP00000215832,9606.ENSP00000249071,9606.ENSP00000256078,9606.ENSP00000302486,9606.ENSP00000304283,9606.ENSP00000312999,9606.ENSP00000324804,9606.ENSP00000343027,9606.ENSP00000358867,9606.ENSP00000382342,9606.ENSP00000400175,9606.ENSP00000400717,9606.ENSP00000443631	MAPK1,RAC2,KRAS,MAP2K1,RAC3,GNAI2,PPP2R1A,GNAI1,GNAI3,ABCC1,RHOA,GNA13,PLCB3
HCT116	cell&exo	75	hsa05212	Pancreatic cancer	10	73	0.6	0.002	9606.ENSP00000005257,9606.ENSP00000215832,9606.ENSP00000249071,9606.ENSP00000256078,9606.ENSP00000264657,9606.ENSP00000275493,9606.ENSP00000302486,9606.ENSP00000304283,9606.ENSP00000354394,9606.ENSP00000383118	RALA,MAPK1,RAC2,KRAS,STAT3,EGFR,MAP2K1,RAC3,STAT1,CDC42
HCT116	cell&exo	76	hsa00250	Alanine, aspartate and glutamate metabolism	7	36	0.75	0.0022	9606.ENSP00000175506,9606.ENSP00000264705,9606.ENSP00000307188,9606.ENSP00000349860,9606.ENSP00000359539,9606.ENSP00000361471,9606.ENSP00000485525	ASNS,CAD,ASL,GFPT1,GOT1,ASS1,ADSL
HCT116	cell&exo	77	hsa04024	cAMP signaling pathway	18	208	0.4	0.0027	9606.ENSP00000215832,9606.ENSP00000246792,9606.ENSP00000249071,9606.ENSP00000250559,9606.ENSP00000256196,9606.ENSP00000272298,9606.ENSP00000302486,9606.ENSP00000304283,9606.ENSP00000312999,9606.ENSP00000326031,9606.ENSP00000339740,9606.ENSP00000343027,9606.ENSP00000350310,9606.ENSP00000358867,9606.ENSP00000378769,9606.ENSP00000392043,9606.ENSP00000400175,9606.ENSP00000445306	MAPK1,RRAS,RAC2,RAP1B,RRAS2,CALM2,MAP2K1,RAC3,GNAI2,PPP1CA,CAMK2D,GNAI1,ATP2B4,GNAI3,PPP1CB,ATP2B1,RHOA,ATP1A1
HCT116	cell&exo	78	hsa00230	Purine metabolism	13	127	0.47	0.0036	9606.ENSP00000236959,9606.ENSP00000256578,9606.ENSP00000257770,9606.ENSP00000265174,9606.ENSP00000300738,9606.ENSP00000313490,9606.ENSP00000321584,9606.ENSP00000367615,9606.ENSP00000371253,9606.ENSP00000376886,9606.ENSP00000382595,9606.ENSP00000419851,9606.ENSP00000485525	ATIC,AMPD2,NT5E,PAPSS1,RRM1,PFAS,IMPDH2,APRT,GART,NME1-NME2,PAICS,GMPS,ADSL
HCT116	cell&exo	79	hsa00480	Glutathione metabolism	8	53	0.64	0.0039	9606.ENSP00000226299,9606.ENSP00000270776,9606.ENSP00000300738,9606.ENSP00000342026,9606.ENSP00000358727,9606.ENSP00000366156,9606.ENSP00000377192,9606.ENSP00000390265	LAP3,PGD,RRM1,PRDX6,GSTO1,SRM,G6PD,IDH1
HCT116	cell&exo	80	hsa04961	Endocrine and other factor-regulated calcium reabsorption	8	53	0.64	0.0039	9606.ENSP00000261890,9606.ENSP00000350310,9606.ENSP00000373905,9606.ENSP00000392043,9606.ENSP00000443631,9606.ENSP00000445306,9606.ENSP00000479606,9606.ENSP00000482835	RAB11A,ATP2B4,DNM2,ATP2B1,PLCB3,ATP1A1,CLTC,AP2B1
HCT116	cell&exo	81	hsa00020	Citrate cycle (TCA cycle)	6	29	0.78	0.004	9606.ENSP00000253792,9606.ENSP00000309477,9606.ENSP00000327070,9606.ENSP00000335304,9606.ENSP00000390265,9606.ENSP00000438144	ACLY,ACO1,MDH2,DLST,IDH1,MDH1
HCT116	cell&exo	82	hsa04072	Phospholipase D signaling pathway	14	147	0.44	0.0042	9606.ENSP00000005257,9606.ENSP00000215832,9606.ENSP00000246792,9606.ENSP00000256078,9606.ENSP00000256196,9606.ENSP00000275493,9606.ENSP00000298316,9606.ENSP00000302486,9606.ENSP00000340944,9606.ENSP00000373905,9606.ENSP00000400175,9606.ENSP00000400717,9606.ENSP00000443631,9606.ENSP00000482457	RALA,MAPK1,RRAS,KRAS,RRAS2,EGFR,ARF6,MAP2K1,PTPN11,DNM2,RHOA,GNA13,PLCB3,PLCG2
HCT116	cell&exo	83	hsa04261	Adrenergic signaling in cardiomyocytes	14	147	0.44	0.0042	9606.ENSP00000215832,9606.ENSP00000272298,9606.ENSP00000312999,9606.ENSP00000324804,9606.ENSP00000326031,9606.ENSP00000339740,9606.ENSP00000343027,9606.ENSP00000350310,9606.ENSP00000357516,9606.ENSP00000358867,9606.ENSP00000378769,9606.ENSP00000392043,9606.ENSP00000443631,9606.ENSP00000445306	MAPK1,CALM2,GNAI2,PPP2R1A,PPP1CA,CAMK2D,GNAI1,ATP2B4,TPM3,GNAI3,PPP1CB,ATP2B1,PLCB3,ATP1A1
HCT116	cell&exo	84	hsa04935	Growth hormone synthesis, secretion and action	12	118	0.47	0.0056	9606.ENSP00000078429,9606.ENSP00000215832,9606.ENSP00000256078,9606.ENSP00000264657,9606.ENSP00000302486,9606.ENSP00000312999,9606.ENSP00000341189,9606.ENSP00000343027,9606.ENSP00000354394,9606.ENSP00000358867,9606.ENSP00000443631,9606.ENSP00000482457	GNA11,MAPK1,KRAS,STAT3,MAP2K1,GNAI2,PTK2,GNAI1,STAT1,GNAI3,PLCB3,PLCG2
HCT116	cell&exo	85	hsa05213	Endometrial cancer	8	57	0.61	0.0056	9606.ENSP00000215832,9606.ENSP00000256078,9606.ENSP00000261769,9606.ENSP00000275493,9606.ENSP00000302486,9606.ENSP00000304669,9606.ENSP00000344456,9606.ENSP00000379975	MAPK1,KRAS,CDH1,EGFR,MAP2K1,CTNNA1,CTNNB1,ILK
HCT116	cell&exo	86	hsa04928	Parathyroid hormone synthesis, secretion and action	11	103	0.49	0.0059	9606.ENSP00000078429,9606.ENSP00000215832,9606.ENSP00000262613,9606.ENSP00000275493,9606.ENSP00000302486,9606.ENSP00000312999,9606.ENSP00000343027,9606.ENSP00000358867,9606.ENSP00000400175,9606.ENSP00000400717,9606.ENSP00000443631	GNA11,MAPK1,SLC9A3R1,EGFR,MAP2K1,GNAI2,GNAI1,GNAI3,RHOA,GNA13,PLCB3
HCT116	cell&exo	87	hsa04971	Gastric acid secretion	9	73	0.55	0.0063	9606.ENSP00000272298,9606.ENSP00000312999,9606.ENSP00000339740,9606.ENSP00000343027,9606.ENSP00000356042,9606.ENSP00000358867,9606.ENSP00000443631,9606.ENSP00000445306,9606.ENSP00000458162	CALM2,GNAI2,CAMK2D,GNAI1,EZR,GNAI3,PLCB3,ATP1A1,ACTG1
HCT116	cell&exo	88	hsa00040	Pentose and glucuronate interconversions	6	33	0.72	0.0066	9606.ENSP00000267814,9606.ENSP00000285930,9606.ENSP00000303356,9606.ENSP00000319501,9606.ENSP00000338703,9606.ENSP00000361140	SORD,AKR1B1,DCXR,UGDH,UGP2,AKR1A1
HCT116	cell&exo	89	hsa04010	MAPK signaling pathway	21	288	0.32	0.0066	9606.ENSP00000215832,9606.ENSP00000246792,9606.ENSP00000248553,9606.ENSP00000249071,9606.ENSP00000250559,9606.ENSP00000256078,9606.ENSP00000256196,9606.ENSP00000261716,9606.ENSP00000275493,9606.ENSP00000302486,9606.ENSP00000304283,9606.ENSP00000317272,9606.ENSP00000327145,9606.ENSP00000351209,9606.ENSP00000358866,9606.ENSP00000360021,9606.ENSP00000364801,9606.ENSP00000368884,9606.ENSP00000383118,…	MAPK1,RRAS,HSPB1,RAC2,RAP1B,KRAS,RRAS2,TAOK1,EGFR,MAP2K1,RAC3,MET,FLNC,EPHA2,FLNA,GNG12,HSPA1B,RPS6KA3,CDC42,FLNB,HSPA8
HCT116	cell&exo	90	hsa04721	Synaptic vesicle cycle	9	74	0.55	0.0066	9606.ENSP00000261205,9606.ENSP00000263354,9606.ENSP00000273398,9606.ENSP00000276390,9606.ENSP00000362399,9606.ENSP00000373905,9606.ENSP00000381293,9606.ENSP00000479606,9606.ENSP00000482835	SYT1,NAPA,ATP6V1A,ATP6V1B2,STXBP1,DNM2,NSF,CLTC,AP2B1
HCT116	cell&exo	91	hsa04912	GnRH signaling pathway	10	89	0.51	0.0066	9606.ENSP00000078429,9606.ENSP00000215832,9606.ENSP00000256078,9606.ENSP00000272298,9606.ENSP00000275493,9606.ENSP00000302486,9606.ENSP00000339740,9606.ENSP00000362680,9606.ENSP00000383118,9606.ENSP00000443631	GNA11,MAPK1,KRAS,CALM2,EGFR,MAP2K1,CAMK2D,SRC,CDC42,PLCB3
HCT116	cell&exo	92	hsa05133	Pertussis	9	74	0.55	0.0066	9606.ENSP00000215832,9606.ENSP00000272298,9606.ENSP00000298159,9606.ENSP00000312999,9606.ENSP00000343027,9606.ENSP00000358867,9606.ENSP00000379350,9606.ENSP00000400175,9606.ENSP00000432660	MAPK1,CALM2,CFL2,GNAI2,GNAI1,GNAI3,ITGB1,RHOA,CFL1
HCT116	cell&exo	93	hsa00330	Arginine and proline metabolism	7	48	0.63	0.0082	9606.ENSP00000220966,9606.ENSP00000226299,9606.ENSP00000263556,9606.ENSP00000325548,9606.ENSP00000346827,9606.ENSP00000359539,9606.ENSP00000366156	PYCRL,LAP3,P4HA1,CNDP2,ALDH9A1,GOT1,SRM
HCT116	cell&exo	94	hsa01521	EGFR tyrosine kinase inhibitor resistance	9	78	0.52	0.0087	9606.ENSP00000215832,9606.ENSP00000256078,9606.ENSP00000264657,9606.ENSP00000275493,9606.ENSP00000302486,9606.ENSP00000317272,9606.ENSP00000362680,9606.ENSP00000369757,9606.ENSP00000482457	MAPK1,KRAS,STAT3,EGFR,MAP2K1,MET,SRC,RPS6,PLCG2
HCT116	cell&exo	95	hsa04725	Cholinergic synapse	11	110	0.46	0.0087	9606.ENSP00000078429,9606.ENSP00000215832,9606.ENSP00000256078,9606.ENSP00000302486,9606.ENSP00000312999,9606.ENSP00000339740,9606.ENSP00000343027,9606.ENSP00000358867,9606.ENSP00000360021,9606.ENSP00000443631,9606.ENSP00000481878	GNA11,MAPK1,KRAS,MAP2K1,GNAI2,CAMK2D,GNAI1,GNAI3,GNG12,PLCB3,GNB1
HCT116	cell&exo	96	hsa05216	Thyroid cancer	6	36	0.68	0.0089	9606.ENSP00000215832,9606.ENSP00000256078,9606.ENSP00000261769,9606.ENSP00000302486,9606.ENSP00000344456,9606.ENSP00000357516	MAPK1,KRAS,CDH1,MAP2K1,CTNNB1,TPM3
HCT116	cell&exo	97	hsa04728	Dopaminergic synapse	12	128	0.43	0.009	9606.ENSP00000272298,9606.ENSP00000307078,9606.ENSP00000312999,9606.ENSP00000324804,9606.ENSP00000326031,9606.ENSP00000339740,9606.ENSP00000343027,9606.ENSP00000358867,9606.ENSP00000360021,9606.ENSP00000378769,9606.ENSP00000443631,9606.ENSP00000481878	CALM2,KIF5B,GNAI2,PPP2R1A,PPP1CA,CAMK2D,GNAI1,GNAI3,GNG12,PPP1CB,PLCB3,GNB1
HCT116	cell&exo	98	hsa04916	Melanogenesis	10	95	0.48	0.0092	9606.ENSP00000215832,9606.ENSP00000256078,9606.ENSP00000272298,9606.ENSP00000302486,9606.ENSP00000312999,9606.ENSP00000339740,9606.ENSP00000343027,9606.ENSP00000344456,9606.ENSP00000358867,9606.ENSP00000443631	MAPK1,KRAS,CALM2,MAP2K1,GNAI2,CAMK2D,GNAI1,CTNNB1,GNAI3,PLCB3
HCT116	cell&exo	99	hsa05210	Colorectal cancer	9	82	0.5	0.0114	9606.ENSP00000005257,9606.ENSP00000215832,9606.ENSP00000249071,9606.ENSP00000256078,9606.ENSP00000275493,9606.ENSP00000302486,9606.ENSP00000304283,9606.ENSP00000344456,9606.ENSP00000400175	RALA,MAPK1,RAC2,KRAS,EGFR,MAP2K1,RAC3,CTNNB1,RHOA
HCT116	cell&exo	100	hsa04270	Vascular smooth muscle contraction	12	133	0.42	0.0117	9606.ENSP00000078429,9606.ENSP00000215832,9606.ENSP00000216181,9606.ENSP00000272298,9606.ENSP00000302486,9606.ENSP00000326031,9606.ENSP00000353590,9606.ENSP00000378769,9606.ENSP00000400175,9606.ENSP00000400717,9606.ENSP00000443631,9606.ENSP00000446955	GNA11,MAPK1,MYH9,CALM2,MAP2K1,PPP1CA,MYH10,PPP1CB,RHOA,GNA13,PLCB3,MYL6
HCT116	cell&exo	101	hsa04012	ErbB signaling pathway	9	83	0.5	0.012	9606.ENSP00000215832,9606.ENSP00000256078,9606.ENSP00000275493,9606.ENSP00000302486,9606.ENSP00000339740,9606.ENSP00000341189,9606.ENSP00000362680,9606.ENSP00000469413,9606.ENSP00000482457	MAPK1,KRAS,EGFR,MAP2K1,CAMK2D,PTK2,SRC,PAK4,PLCG2
HCT116	cell&exo	102	hsa04625	C-type lectin receptor signaling pathway	10	102	0.45	0.0142	9606.ENSP00000215832,9606.ENSP00000246792,9606.ENSP00000256078,9606.ENSP00000256196,9606.ENSP00000272298,9606.ENSP00000340944,9606.ENSP00000354394,9606.ENSP00000362680,9606.ENSP00000400175,9606.ENSP00000482457	MAPK1,RRAS,KRAS,RRAS2,CALM2,PTPN11,STAT1,SRC,RHOA,PLCG2
HCT116	cell&exo	103	hsa04110	Cell cycle	11	120	0.42	0.0147	9606.ENSP00000248975,9606.ENSP00000264335,9606.ENSP00000306330,9606.ENSP00000307288,9606.ENSP00000313420,9606.ENSP00000340989,9606.ENSP00000357858,9606.ENSP00000361930,9606.ENSP00000368458,9606.ENSP00000371267,9606.ENSP00000379287	YWHAH,YWHAE,YWHAG,MCM7,PRKDC,SFN,BUB3,YWHAB,PCNA,YWHAQ,YWHAZ
HCT116	cell&exo	104	hsa04152	AMPK signaling pathway	11	120	0.42	0.0147	9606.ENSP00000258418,9606.ENSP00000262646,9606.ENSP00000264710,9606.ENSP00000269848,9606.ENSP00000300935,9606.ENSP00000304592,9606.ENSP00000307940,9606.ENSP00000324804,9606.ENSP00000345771,9606.ENSP00000362946,9606.ENSP00000370517	CAB39,RAB2A,RAB10,PFKL,RAB8A,FASN,EEF2,PPP2R1A,PFKM,RAB14,PFKP
HCT116	cell&exo	105	hsa05219	Bladder cancer	6	41	0.63	0.0147	9606.ENSP00000215832,9606.ENSP00000256078,9606.ENSP00000261769,9606.ENSP00000275493,9606.ENSP00000302486,9606.ENSP00000362680	MAPK1,KRAS,CDH1,EGFR,MAP2K1,SRC
HCT116	cell&exo	106	hsa05235	PD-L1 expression and PD-1 checkpoint pathway in cancer	9	88	0.47	0.0163	9606.ENSP00000215832,9606.ENSP00000217244,9606.ENSP00000256078,9606.ENSP00000264657,9606.ENSP00000275493,9606.ENSP00000302486,9606.ENSP00000340944,9606.ENSP00000354394,9606.ENSP00000365042	MAPK1,CSNK2A1,KRAS,STAT3,EGFR,MAP2K1,PTPN11,STAT1,CSNK2B
HCT116	cell&exo	107	hsa05410	Hypertrophic cardiomyopathy	9	89	0.47	0.0172	9606.ENSP00000007722,9606.ENSP00000200181,9606.ENSP00000261023,9606.ENSP00000296181,9606.ENSP00000296585,9606.ENSP00000357516,9606.ENSP00000379350,9606.ENSP00000386896,9606.ENSP00000458162	ITGA3,ITGB4,ITGAV,ITGB5,ITGA2,TPM3,ITGB1,ITGA6,ACTG1
HCT116	cell&exo	108	hsa00052	Galactose metabolism	5	30	0.68	0.018	9606.ENSP00000269848,9606.ENSP00000285930,9606.ENSP00000338703,9606.ENSP00000345771,9606.ENSP00000370517	PFKL,AKR1B1,UGP2,PFKM,PFKP
HCT116	cell&exo	109	hsa03018	RNA degradation	8	75	0.49	0.02	9606.ENSP00000234590,9606.ENSP00000269848,9606.ENSP00000313007,9606.ENSP00000320949,9606.ENSP00000324105,9606.ENSP00000345771,9606.ENSP00000370517,9606.ENSP00000373620	ENO1,PFKL,PABPC1,CNOT1,ENO3,PFKM,PFKP,HSPD1
HCT116	cell&exo	110	hsa04713	Circadian entrainment	9	92	0.45	0.0204	9606.ENSP00000215832,9606.ENSP00000272298,9606.ENSP00000312999,9606.ENSP00000339740,9606.ENSP00000343027,9606.ENSP00000358867,9606.ENSP00000360021,9606.ENSP00000443631,9606.ENSP00000481878	MAPK1,CALM2,GNAI2,CAMK2D,GNAI1,GNAI3,GNG12,PLCB3,GNB1
HCT116	cell&exo	111	hsa05222	Small cell lung cancer	9	92	0.45	0.0204	9606.ENSP00000007722,9606.ENSP00000222399,9606.ENSP00000252999,9606.ENSP00000258341,9606.ENSP00000261023,9606.ENSP00000296585,9606.ENSP00000341189,9606.ENSP00000379350,9606.ENSP00000386896	ITGA3,LAMB1,LAMA5,LAMC1,ITGAV,ITGA2,PTK2,ITGB1,ITGA6
HCT116	cell&exo	112	hsa04926	Relaxin signaling pathway	11	128	0.4	0.021	9606.ENSP00000215832,9606.ENSP00000256078,9606.ENSP00000275493,9606.ENSP00000302486,9606.ENSP00000312999,9606.ENSP00000343027,9606.ENSP00000358867,9606.ENSP00000360021,9606.ENSP00000362680,9606.ENSP00000443631,9606.ENSP00000481878	MAPK1,KRAS,EGFR,MAP2K1,GNAI2,GNAI1,GNAI3,GNG12,SRC,PLCB3,GNB1
HCT116	cell&exo	113	hsa05322	Systemic lupus erythematosus	9	93	0.45	0.0212	9606.ENSP00000215829,9606.ENSP00000244537,9606.ENSP00000252699,9606.ENSP00000254810,9606.ENSP00000332194,9606.ENSP00000355656,9606.ENSP00000362352,9606.ENSP00000377941,9606.ENSP00000423563	SNRPD3,HIST1H4F,ACTN4,H3F3B,HIST2H2AC,HIST3H2A,H2AFY2,ACTN1,H2AFY
HCT116	cell&exo	114	hsa00500	Starch and sucrose metabolism	5	32	0.66	0.0217	9606.ENSP00000216392,9606.ENSP00000216962,9606.ENSP00000294724,9606.ENSP00000338703,9606.ENSP00000405573	PYGL,PYGB,AGL,UGP2,GPI
HCT116	cell&exo	115	hsa04914	Progesterone-mediated oocyte maturation	9	94	0.44	0.0221	9606.ENSP00000215832,9606.ENSP00000256078,9606.ENSP00000302486,9606.ENSP00000312999,9606.ENSP00000335153,9606.ENSP00000343027,9606.ENSP00000358867,9606.ENSP00000360609,9606.ENSP00000368884	MAPK1,KRAS,MAP2K1,GNAI2,HSP90AA1,GNAI1,GNAI3,HSP90AB1,RPS6KA3
HCT116	cell&exo	116	hsa04925	Aldosterone synthesis and secretion	9	95	0.44	0.0233	9606.ENSP00000078429,9606.ENSP00000261693,9606.ENSP00000272298,9606.ENSP00000339740,9606.ENSP00000350310,9606.ENSP00000392043,9606.ENSP00000393978,9606.ENSP00000443631,9606.ENSP00000445306	GNA11,SCARB1,CALM2,CAMK2D,ATP2B4,ATP2B1,PRKD2,PLCB3,ATP1A1
HCT116	cell&exo	117	hsa05414	Dilated cardiomyopathy	9	95	0.44	0.0233	9606.ENSP00000007722,9606.ENSP00000200181,9606.ENSP00000261023,9606.ENSP00000296181,9606.ENSP00000296585,9606.ENSP00000357516,9606.ENSP00000379350,9606.ENSP00000386896,9606.ENSP00000458162	ITGA3,ITGB4,ITGAV,ITGB5,ITGA2,TPM3,ITGB1,ITGA6,ACTG1
HCT116	cell&exo	118	hsa04137	Mitophagy - animal	7	63	0.51	0.0248	9606.ENSP00000217244,9606.ENSP00000246792,9606.ENSP00000256078,9606.ENSP00000256196,9606.ENSP00000265062,9606.ENSP00000362680,9606.ENSP00000365042	CSNK2A1,RRAS,KRAS,RRAS2,RAB7A,SRC,CSNK2B
HCT116	cell&exo	119	hsa04612	Antigen processing and presentation	7	63	0.51	0.0248	9606.ENSP00000300289,9606.ENSP00000302961,9606.ENSP00000324173,9606.ENSP00000335153,9606.ENSP00000360609,9606.ENSP00000364801,9606.ENSP00000432083	PDIA3,HSPA4,HSPA5,HSP90AA1,HSP90AB1,HSPA1B,HSPA8
HCT116	cell&exo	120	hsa05110	Vibrio cholerae infection	6	48	0.56	0.0252	9606.ENSP00000262461,9606.ENSP00000273398,9606.ENSP00000276390,9606.ENSP00000281537,9606.ENSP00000458162,9606.ENSP00000482457	SLC12A2,ATP6V1A,ATP6V1B2,TJP1,ACTG1,PLCG2
HCT116	cell&exo	121	hsa04934	Cushing syndrome	12	153	0.36	0.0265	9606.ENSP00000078429,9606.ENSP00000215832,9606.ENSP00000250559,9606.ENSP00000261693,9606.ENSP00000275493,9606.ENSP00000302486,9606.ENSP00000312999,9606.ENSP00000339740,9606.ENSP00000343027,9606.ENSP00000344456,9606.ENSP00000358867,9606.ENSP00000443631	GNA11,MAPK1,RAP1B,SCARB1,EGFR,MAP2K1,GNAI2,CAMK2D,GNAI1,CTNNB1,GNAI3,PLCB3
HCT116	cell&exo	122	hsa04972	Pancreatic secretion	9	98	0.42	0.0265	9606.ENSP00000250559,9606.ENSP00000261890,9606.ENSP00000262461,9606.ENSP00000300935,9606.ENSP00000350310,9606.ENSP00000392043,9606.ENSP00000400175,9606.ENSP00000443631,9606.ENSP00000445306	RAP1B,RAB11A,SLC12A2,RAB8A,ATP2B4,ATP2B1,RHOA,PLCB3,ATP1A1
HCT116	cell&exo	123	hsa04664	Fc epsilon RI signaling pathway	7	66	0.49	0.0297	9606.ENSP00000215832,9606.ENSP00000249071,9606.ENSP00000256078,9606.ENSP00000302486,9606.ENSP00000304283,9606.ENSP00000428924,9606.ENSP00000482457	MAPK1,RAC2,KRAS,MAP2K1,RAC3,LYN,PLCG2
HCT116	cell&exo	124	hsa03450	Non-homologous end-joining	3	12	0.86	0.0339	9606.ENSP00000313420,9606.ENSP00000352257,9606.ENSP00000375978	PRKDC,XRCC6,XRCC5
HCT116	cell&exo	125	hsa04960	Aldosterone-regulated sodium reabsorption	5	37	0.59	0.0339	9606.ENSP00000215832,9606.ENSP00000256078,9606.ENSP00000340989,9606.ENSP00000383199,9606.ENSP00000445306	MAPK1,KRAS,SFN,NEDD4L,ATP1A1
HCT116	cell&exo	126	hsa05223	Non-small cell lung cancer	7	68	0.47	0.0339	9606.ENSP00000215832,9606.ENSP00000256078,9606.ENSP00000264657,9606.ENSP00000275493,9606.ENSP00000302486,9606.ENSP00000317272,9606.ENSP00000482457	MAPK1,KRAS,STAT3,EGFR,MAP2K1,MET,PLCG2
HCT116	cell&exo	127	hsa00620	Pyruvate metabolism	5	38	0.58	0.0366	9606.ENSP00000327070,9606.ENSP00000346827,9606.ENSP00000379386,9606.ENSP00000438144,9606.ENSP00000445175	MDH2,ALDH9A1,LDHB,MDH1,LDHA
HCT116	cell&exo	128	hsa04931	Insulin resistance	9	107	0.39	0.0414	9606.ENSP00000216392,9606.ENSP00000216962,9606.ENSP00000264657,9606.ENSP00000326031,9606.ENSP00000340944,9606.ENSP00000349860,9606.ENSP00000368884,9606.ENSP00000378769,9606.ENSP00000416293	PYGL,PYGB,STAT3,PPP1CA,PTPN11,GFPT1,RPS6KA3,PPP1CB,SLC2A1
HCT116	cell&exo	129	hsa05214	Glioma	7	72	0.45	0.0426	9606.ENSP00000215832,9606.ENSP00000256078,9606.ENSP00000272298,9606.ENSP00000275493,9606.ENSP00000302486,9606.ENSP00000339740,9606.ENSP00000482457	MAPK1,KRAS,CALM2,EGFR,MAP2K1,CAMK2D,PLCG2
HCT116	cell&exo	130	hsa04726	Serotonergic synapse	9	108	0.38	0.0429	9606.ENSP00000215832,9606.ENSP00000256078,9606.ENSP00000302486,9606.ENSP00000312999,9606.ENSP00000343027,9606.ENSP00000358867,9606.ENSP00000360021,9606.ENSP00000443631,9606.ENSP00000481878	MAPK1,KRAS,MAP2K1,GNAI2,GNAI1,GNAI3,GNG12,PLCB3,GNB1
HCT116	cell&exo	131	hsa04216	Ferroptosis	5	41	0.55	0.0465	9606.ENSP00000273550,9606.ENSP00000305556,9606.ENSP00000339787,9606.ENSP00000353224,9606.ENSP00000367123	FTH1,PCBP1,ACSL4,TFRC,SLC3A2
HCT116	onlyexo	1	hsa04144	Endocytosis	15	241	0.89	7.2e-07	9606.ENSP00000294742,9606.ENSP00000301765,9606.ENSP00000327116,9606.ENSP00000345361,9606.ENSP00000353444,9606.ENSP00000354772,9606.ENSP00000356705,9606.ENSP00000360672,9606.ENSP00000363921,9606.ENSP00000379873,9606.ENSP00000380998,9606.ENSP00000399168,9606.ENSP00000411825,9606.ENSP00000432279,9606.ENSP00000469240	ARPC5,VPS37C,EHD3,ARPC5L,RAB5B,MVB12B,DNM3,PARD6B,PARD3,HLA-A,CHMP1A,HLA-B,PDCD6IP,CHMP1B,CHMP2A
HCT116	onlyexo	2	hsa04512	ECM-receptor interaction	9	88	1.11	1.35e-05	9606.ENSP00000260356,9606.ENSP00000295550,9606.ENSP00000300527,9606.ENSP00000346839,9606.ENSP00000355361,9606.ENSP00000357362,9606.ENSP00000363827,9606.ENSP00000368678,9606.ENSP00000452786	THBS1,COL6A3,COL6A2,FN1,CD47,THBS3,HSPG2,AGRN,ITGB3
HCT116	onlyexo	3	hsa05165	Human papillomavirus infection	12	325	0.66	0.0019	9606.ENSP00000216442,9606.ENSP00000221138,9606.ENSP00000260356,9606.ENSP00000295550,9606.ENSP00000300527,9606.ENSP00000346839,9606.ENSP00000357362,9606.ENSP00000360672,9606.ENSP00000363921,9606.ENSP00000379873,9606.ENSP00000399168,9606.ENSP00000452786	ATP6V1D,PPP2CB,THBS1,COL6A3,COL6A2,FN1,THBS3,PARD6B,PARD3,HLA-A,HLA-B,ITGB3
HCT116	onlyexo	4	hsa04145	Phagosome	8	142	0.85	0.0023	9606.ENSP00000216442,9606.ENSP00000225275,9606.ENSP00000260356,9606.ENSP00000353444,9606.ENSP00000357362,9606.ENSP00000379873,9606.ENSP00000399168,9606.ENSP00000452786	ATP6V1D,MPO,THBS1,RAB5B,THBS3,HLA-A,HLA-B,ITGB3
HCT116	onlyexo	5	hsa04062	Chemokine signaling pathway	8	186	0.73	0.0103	9606.ENSP00000256935,9606.ENSP00000312185,9606.ENSP00000338864,9606.ENSP00000352121,9606.ENSP00000359675,9606.ENSP00000363411,9606.ENSP00000363921,9606.ENSP00000391676	DOCK2,ELMO1,RASGRP2,PIK3CG,GNG5,GNG10,PARD3,JAK3
HCT116	onlyexo	6	hsa04151	PI3K-Akt signaling pathway	11	350	0.59	0.0103	9606.ENSP00000221138,9606.ENSP00000260356,9606.ENSP00000295550,9606.ENSP00000300527,9606.ENSP00000346839,9606.ENSP00000352121,9606.ENSP00000357362,9606.ENSP00000359675,9606.ENSP00000363411,9606.ENSP00000391676,9606.ENSP00000452786	PPP2CB,THBS1,COL6A3,COL6A2,FN1,PIK3CG,THBS3,GNG5,GNG10,JAK3,ITGB3
HCT116	onlyexo	7	hsa05100	Bacterial invasion of epithelial cells	5	70	0.95	0.0159	9606.ENSP00000294742,9606.ENSP00000312185,9606.ENSP00000345361,9606.ENSP00000346839,9606.ENSP00000356705	ARPC5,ELMO1,ARPC5L,FN1,DNM3
HCT116	onlyexo	8	hsa04514	Cell adhesion molecules	6	137	0.74	0.0423	9606.ENSP00000264012,9606.ENSP00000265077,9606.ENSP00000352513,9606.ENSP00000378577,9606.ENSP00000379873,9606.ENSP00000399168	CDH3,VCAN,MPZL1,CLDN3,HLA-A,HLA-B
HCT116	onlyexo	9	hsa04510	Focal adhesion	7	198	0.64	0.0457	9606.ENSP00000260356,9606.ENSP00000295550,9606.ENSP00000300527,9606.ENSP00000346839,9606.ENSP00000357362,9606.ENSP00000384515,9606.ENSP00000452786	THBS1,COL6A3,COL6A2,FN1,THBS3,PARVB,ITGB3
HCT116	onlyexo	10	hsa05205	Proteoglycans in cancer	7	196	0.65	0.0457	9606.ENSP00000260356,9606.ENSP00000264039,9606.ENSP00000346839,9606.ENSP00000361850,9606.ENSP00000363827,9606.ENSP00000447730,9606.ENSP00000452786	THBS1,GPC1,FN1,PLAU,HSPG2,CD63,ITGB3
HT29	cell&exo	1	hsa03010	Ribosome	62	130	0.85	2.53e-25	9606.ENSP00000222247,9606.ENSP00000225430,9606.ENSP00000251453,9606.ENSP00000259469,9606.ENSP00000262584,9606.ENSP00000270625,9606.ENSP00000296674,9606.ENSP00000302896,9606.ENSP00000307889,9606.ENSP00000309334,9606.ENSP00000309830,9606.ENSP00000311430,9606.ENSP00000315017,9606.ENSP00000318646,9606.ENSP00000322419,9606.ENSP00000339095,9606.ENSP00000339795,9606.ENSP00000341885,9606.ENSP00000345957,…	RPL18A,RPL19,RPS16,RPL35,RPL8,RPS11,RPS23,RPS9,RPL13,RPL15,RPL38,RPL4,MRPL1,RPS15A,RPLP2,RPS7,RPL7,RPS2,RPS21,RPL3,RPL27A,RPL21,RPS17,RPS3A,RPSA,RPL22,MRPL21,RPL12,RPL5,RPL7A,RPS4X,RPL10A,RPL11,RPS6,RPL13A,MRPL19,RPL24,RPL14,RPS8,RPS14,RPL23A,RPS18,RPL17,RPL9,RPL6,RPL10,RPS24,RPL29,RPL35A,RPL23,RPL30,RPS20,RPS25,RPS13,RPL18,RPLP0,RPL28,RPL26,RPL36,RPS15,RPS19,RPS5
HT29	cell&exo	2	hsa01100	Metabolic pathways	202	1447	0.31	1.83e-18	9606.ENSP00000168216,9606.ENSP00000175506,9606.ENSP00000178638,9606.ENSP00000205402,9606.ENSP00000215567,9606.ENSP00000216254,9606.ENSP00000216392,9606.ENSP00000216605,9606.ENSP00000216951,9606.ENSP00000216962,9606.ENSP00000217426,9606.ENSP00000222553,9606.ENSP00000223127,9606.ENSP00000226253,9606.ENSP00000226299,9606.ENSP00000227868,9606.ENSP00000229239,9606.ENSP00000229270,9606.ENSP00000229416,…	HSD17B10,ASNS,CA12,DLD,TECR,ACO2,PYGL,MTHFD1,GSS,PYGB,AHCY,NAMPT,PLOD3,ALDOC,LAP3,PDHX,GAPDH,TPI1,GCLC,UMPS,MOGS,ATP6V1B1,SPR,ENO1,ATIC,RPN2,GOT2,COLGALT1,PGLS,ACLY,PI4KA,AMPD2,NT5E,SQRDL,ALDH2,MARS,ATP5B,BLVRB,P4HA1,NDUFS3,PPAT,ATP6V0A1,NNT,CAD,SDHA,HIBADH,ACAT1,SORD,PMM2,UQCRC2,PFKL,PGD,ATP6V1A,GGCT,ATP6V1B2,HSD17B12,DLAT,QDPR,RPIA,ACAA2,ADK,FUK,ATP5O,CBR1,PDXK,ETHE1,AGL,RPN1,ADH5,ALDH1A1,HPRT1…
HT29	cell&exo	3	hsa04144	Endocytosis	69	241	0.63	2.03e-18	9606.ENSP00000217402,9606.ENSP00000220325,9606.ENSP00000228825,9606.ENSP00000229340,9606.ENSP00000238497,9606.ENSP00000251968,9606.ENSP00000253794,9606.ENSP00000254950,9606.ENSP00000256682,9606.ENSP00000261889,9606.ENSP00000261890,9606.ENSP00000262942,9606.ENSP00000263168,9606.ENSP00000263277,9606.ENSP00000264710,9606.ENSP00000265062,9606.ENSP00000267202,9606.ENSP00000268035,9606.ENSP00000273047,…	CHMP4B,EHD4,ARPC3,RAB35,VPS4B,TSG101,VPS25,VPS4A,ARF3,SNX1,RAB11A,ARPC1A,CAPZA1,EHD2,RAB10,RAB7A,VPS37B,IGF1R,RAB5A,EGFR,AP2M1,ARPC2,PRKCI,ARF6,VPS35,RAB8A,ARF4,KIF5B,ADRBK1,CHMP4A,AP2A2,HGS,ARPC5L,AP2A1,TFRC,RAB5B,CAPZA2,RAB4A,VTA1,PARD6B,SH3GLB2,DNM1,VPS26A,SRC,HSPA1B,VPS28,SNX5,VPS36,DNM2,USP8,HLA-A,SH3KBP1,CDC42,NEDD4L,ARPC4,ARPC1B,EPS15L1,RHOA,SNF8,HSPA8,ARFGAP2,IST1,RAB5C,EHD1,CLTC,ITCH,VPS…
HT29	cell&exo	4	hsa04810	Regulation of actin cytoskeleton	63	209	0.65	8.27e-18	9606.ENSP00000007722,9606.ENSP00000200181,9606.ENSP00000211998,9606.ENSP00000215832,9606.ENSP00000216181,9606.ENSP00000225655,9606.ENSP00000228825,9606.ENSP00000246792,9606.ENSP00000249071,9606.ENSP00000252699,9606.ENSP00000256078,9606.ENSP00000256196,9606.ENSP00000261023,9606.ENSP00000262942,9606.ENSP00000262948,9606.ENSP00000268182,9606.ENSP00000274364,9606.ENSP00000275493,9606.ENSP00000283249,…	ITGA3,ITGB4,VCL,MAPK1,MYH9,PFN1,ARPC3,RRAS,RAC2,ACTN4,KRAS,RRAS2,ITGAV,ARPC1A,MAP2K2,IQGAP1,IQGAP2,EGFR,ITGB6,ARAF,ARPC2,ABI2,ITGB5,ITGA2,MAP2K1,PAK2,BAIAP2,ROCK2,PPP1CA,ARHGEF1,PTK2,PPP1CC,ARPC5L,ACTB,MSN,MYH10,NCKAP1,IQGAP3,ENAH,EZR,NRAS,GNG12,SRC,ACTN1,PPP1CB,ITGB1,DIAPH1,CDC42,RDX,ARHGAP35,ITGA6,ARPC4,ARPC1B,RHOA,GNA13,PIK3R1,CFL1,ACTG1,MYL12B,PAK4,MYH14,CYFIP1,WASF2
HT29	cell&exo	5	hsa01200	Carbon metabolism	47	117	0.77	3.38e-17	9606.ENSP00000205402,9606.ENSP00000216254,9606.ENSP00000226253,9606.ENSP00000229239,9606.ENSP00000229270,9606.ENSP00000234590,9606.ENSP00000245206,9606.ENSP00000252603,9606.ENSP00000264932,9606.ENSP00000265838,9606.ENSP00000269848,9606.ENSP00000270776,9606.ENSP00000280346,9606.ENSP00000283646,9606.ENSP00000296412,9606.ENSP00000299518,9606.ENSP00000309477,9606.ENSP00000316924,9606.ENSP00000320171,…	DLD,ACO2,ALDOC,GAPDH,TPI1,ENO1,GOT2,PGLS,SDHA,ACAT1,PFKL,PGD,DLAT,RPIA,ADH5,IDH3A,ACO1,ACSS1,PKM,TALDO1,ENO3,MDH2,IDH2,SHMT2,DLST,CS,PFKM,FH,ACAT2,ECHS1,PHGDH,GOT1,PGAM1,PRPS1,PGK1,PSAT1,HADHA,PFKP,G6PD,SUCLG1,PC,ALDOA,PSPH,IDH1,TKT,GPI,MDH1
HT29	cell&exo	6	hsa01230	Biosynthesis of amino acids	37	73	0.87	4.47e-16	9606.ENSP00000175506,9606.ENSP00000216254,9606.ENSP00000226253,9606.ENSP00000229239,9606.ENSP00000229270,9606.ENSP00000234590,9606.ENSP00000245206,9606.ENSP00000269848,9606.ENSP00000283646,9606.ENSP00000299518,9606.ENSP00000303147,9606.ENSP00000307188,9606.ENSP00000309477,9606.ENSP00000320171,9606.ENSP00000321259,9606.ENSP00000324105,9606.ENSP00000325425,9606.ENSP00000331897,9606.ENSP00000333667,…	ASNS,ACO2,ALDOC,GAPDH,TPI1,ENO1,GOT2,PFKL,RPIA,IDH3A,MAT2A,ASL,ACO1,PKM,TALDO1,ENO3,MAT2B,IDH2,SHMT2,CS,PYCR2,PFKM,PHGDH,GOT1,PGAM1,ALDH18A1,ASS1,PRPS1,PGK1,PSAT1,PFKP,PC,ALDOA,PSPH,ACY1,IDH1,TKT
HT29	cell&exo	7	hsa03050	Proteasome	28	43	0.98	3.32e-14	9606.ENSP00000044462,9606.ENSP00000157812,9606.ENSP00000216455,9606.ENSP00000223321,9606.ENSP00000259457,9606.ENSP00000261303,9606.ENSP00000261479,9606.ENSP00000261712,9606.ENSP00000262193,9606.ENSP00000264639,9606.ENSP00000270586,9606.ENSP00000271308,9606.ENSP00000290541,9606.ENSP00000309474,9606.ENSP00000310129,9606.ENSP00000310572,9606.ENSP00000348442,9606.ENSP00000355325,9606.ENSP00000359910,…	PSMA4,PSMC4,PSMA3,PSMA2,PSMB7,PSMC1,PSMA6,PSMD11,PSMB1,PSMD3,PSMB6,PSMA5,PSMB4,PSMD1,PSMD2,PSMC5,PSMD12,PSMB5,PSMA7,PSMB2,PSME4,PSMD14,PSMC2,PSMC6,PSMA1,ADRM1,PSMC3,PSMB3
HT29	cell&exo	8	hsa05010	Alzheimer disease	74	355	0.49	1.02e-13	9606.ENSP00000044462,9606.ENSP00000157812,9606.ENSP00000168216,9606.ENSP00000215832,9606.ENSP00000216455,9606.ENSP00000217244,9606.ENSP00000223321,9606.ENSP00000229239,9606.ENSP00000248437,9606.ENSP00000256078,9606.ENSP00000256383,9606.ENSP00000259457,9606.ENSP00000259708,9606.ENSP00000260408,9606.ENSP00000261303,9606.ENSP00000261479,9606.ENSP00000261712,9606.ENSP00000262030,9606.ENSP00000262193,…	PSMA4,PSMC4,HSD17B10,MAPK1,PSMA3,CSNK2A1,PSMA2,GAPDH,TUBA4A,KRAS,EIF2S1,PSMB7,KLC4,ADAM10,PSMC1,PSMA6,PSMD11,ATP5B,PSMB1,CSNK2A2,MAP2K2,NDUFS3,PSMD3,SDHA,UQCRC2,PSMB6,PSMA5,CALM2,GNAQ,ARAF,ATP5O,PSMB4,NCSTN,CAPN2,MAP2K1,KIF5B,PSMD1,PSMD2,PSMC5,RTN4,TUBB,TUBB4B,CTNNB1,PSMD12,ATP5C1,CASP8,MTOR,MT-CO2,PSMB5,NRAS,ATP5F1,PSMA7,SLC25A5,VDAC2,PSMB2,CSNK2B,RTN3,PPP3CA,ATP5A1,RELA,PSMD14,PSMC2,NDUFS1,PSMC…
HT29	cell&exo	9	hsa05012	Parkinson disease	58	240	0.55	4.65e-13	9606.ENSP00000044462,9606.ENSP00000157812,9606.ENSP00000216455,9606.ENSP00000223321,9606.ENSP00000246957,9606.ENSP00000248437,9606.ENSP00000256383,9606.ENSP00000259457,9606.ENSP00000259708,9606.ENSP00000261303,9606.ENSP00000261479,9606.ENSP00000261712,9606.ENSP00000262030,9606.ENSP00000262193,9606.ENSP00000263774,9606.ENSP00000264639,9606.ENSP00000264932,9606.ENSP00000268379,9606.ENSP00000269305,…	PSMA4,PSMC4,PSMA3,PSMA2,TRAP1,TUBA4A,EIF2S1,PSMB7,KLC4,PSMC1,PSMA6,PSMD11,ATP5B,PSMB1,NDUFS3,PSMD3,SDHA,UQCRC2,TP53,PSMB6,PSMA5,CALM2,ATP5O,PSMB4,BAX,KIF5B,PSMD1,PSMD2,PSMC5,GNAI2,HSPA5,UBA1,TUBB,TUBB4B,GNAI1,PSMD12,ATP5C1,MT-CO2,PSMB5,ATP5F1,GNAI3,PSMA7,GNAS,SLC25A5,VDAC2,PSMB2,MAOB,ATP5A1,PSMD14,PSMC2,NDUFS1,PSMC6,PSMA1,PARK7,VDAC3,ADRM1,PSMC3,PSMB3
HT29	cell&exo	10	hsa05014	Amyotrophic lateral sclerosis	71	352	0.47	1.25e-12	9606.ENSP00000044462,9606.ENSP00000157812,9606.ENSP00000216455,9606.ENSP00000223321,9606.ENSP00000225655,9606.ENSP00000240185,9606.ENSP00000248437,9606.ENSP00000256383,9606.ENSP00000259457,9606.ENSP00000259708,9606.ENSP00000261303,9606.ENSP00000261479,9606.ENSP00000261712,9606.ENSP00000262030,9606.ENSP00000262193,9606.ENSP00000263774,9606.ENSP00000264639,9606.ENSP00000264932,9606.ENSP00000268379,…	PSMA4,PSMC4,PSMA3,PSMA2,PFN1,TARDBP,TUBA4A,EIF2S1,PSMB7,KLC4,PSMC1,PSMA6,PSMD11,ATP5B,PSMB1,NDUFS3,PSMD3,SDHA,UQCRC2,TP53,PSMB6,PSMA5,RAB5A,ATP5O,PSMB4,BAX,RAB8A,KIF5B,PSMD1,PSMD2,PSMC5,NUP93,HSPA5,SRSF7,TUBB,TUBB4B,HNRNPA1,MAP2K3,HNRNPA2B1,PSMD12,ATP5C1,ACTB,VCP,MATR3,MTOR,MT-CO2,PSMB5,ATP5F1,ACTR1A,PSMA7,NUP188,ANXA7,PSMB2,SRSF3,UBQLN1,GPX2,SQSTM1,PPP3CA,ATP5A1,SEH1L,PSMD14,PSMC2,NDUFS1,ANXA11,…
HT29	cell&exo	11	hsa05100	Bacterial invasion of epithelial cells	31	70	0.82	1.96e-12	9606.ENSP00000211998,9606.ENSP00000228825,9606.ENSP00000261769,9606.ENSP00000262942,9606.ENSP00000264893,9606.ENSP00000295685,9606.ENSP00000304669,9606.ENSP00000317272,9606.ENSP00000339467,9606.ENSP00000341189,9606.ENSP00000344456,9606.ENSP00000345361,9606.ENSP00000349960,9606.ENSP00000352264,9606.ENSP00000362014,9606.ENSP00000362680,9606.ENSP00000367991,9606.ENSP00000373905,9606.ENSP00000379350,…	VCL,ARPC3,CDH1,ARPC1A,SEPT11,ARPC2,CTNNA1,MET,RHOG,PTK2,CTNNB1,ARPC5L,ACTB,CD2AP,DNM1,SRC,SEPT8,DNM2,ITGB1,ILK,CDC42,CTNNA2,ARPC4,ARPC1B,SEPT9,RHOA,PIK3R1,ACTG1,CLTC,SEPT2,WASF2
HT29	cell&exo	12	hsa05132	Salmonella infection	52	209	0.57	3.14e-12	9606.ENSP00000215832,9606.ENSP00000225655,9606.ENSP00000228825,9606.ENSP00000229239,9606.ENSP00000246792,9606.ENSP00000253861,9606.ENSP00000259708,9606.ENSP00000261667,9606.ENSP00000262942,9606.ENSP00000262948,9606.ENSP00000262982,9606.ENSP00000265062,9606.ENSP00000273047,9606.ENSP00000273130,9606.ENSP00000293288,9606.ENSP00000295685,9606.ENSP00000298316,9606.ENSP00000299767,9606.ENSP00000302486,…	MAPK1,PFN1,ARPC3,GAPDH,RRAS,EXOC4,KLC4,KPNA3,ARPC1A,MAP2K2,CSE1L,RAB7A,RAB5A,DYNC1LI1,BAX,ARPC2,ARF6,HSP90B1,MAP2K1,SNX18,ROCK2,EXOC7,HSP90AA1,RHOG,KPNA1,CTNNB1,MAP2K3,ARPC5L,ANXA2,DYNC1H1,DYNLRB1,ACTB,CASP8,RAB5B,NCKAP1,S100A10,FLNA,MYO6,HSP90AB1,ABI1,AHNAK,DNM2,CDC42,RELA,ARPC4,ARPC1B,RHOA,FLNB,RAB5C,ACTG1,MYL12B,CYFIP1
HT29	cell&exo	13	hsa05020	Prion disease	59	265	0.52	4.02e-12	9606.ENSP00000044462,9606.ENSP00000157812,9606.ENSP00000215832,9606.ENSP00000216455,9606.ENSP00000217244,9606.ENSP00000223321,9606.ENSP00000248437,9606.ENSP00000249071,9606.ENSP00000256383,9606.ENSP00000258341,9606.ENSP00000259457,9606.ENSP00000259708,9606.ENSP00000261303,9606.ENSP00000261479,9606.ENSP00000261712,9606.ENSP00000262030,9606.ENSP00000262193,9606.ENSP00000262506,9606.ENSP00000263774,…	PSMA4,PSMC4,MAPK1,PSMA3,CSNK2A1,PSMA2,TUBA4A,RAC2,EIF2S1,LAMC1,PSMB7,KLC4,PSMC1,PSMA6,PSMD11,ATP5B,PSMB1,CSNK2A2,NDUFS3,PSMD3,SDHA,UQCRC2,PSMB6,PSMA5,ATP5O,PSMB4,BAX,KIF5B,PSMD1,PSMD2,PSMC5,HSPA5,TUBB,TUBB4B,PSMD12,ATP5C1,STIP1,MT-CO2,PSMB5,ATP5F1,PSMA7,SLC25A5,VDAC2,PSMB2,HSPA1B,CSNK2B,PPP3CA,ATP5A1,PSMD14,PSMC2,NDUFS1,PSMC6,PSMA1,PIK3R1,VDAC3,HSPA8,ADRM1,PSMC3,PSMB3
HT29	cell&exo	14	hsa04530	Tight junction	44	156	0.62	5.78e-12	9606.ENSP00000216181,9606.ENSP00000245932,9606.ENSP00000248437,9606.ENSP00000252699,9606.ENSP00000262613,9606.ENSP00000263238,9606.ENSP00000281537,9606.ENSP00000295797,9606.ENSP00000300935,9606.ENSP00000302961,9606.ENSP00000317985,9606.ENSP00000323867,9606.ENSP00000324804,9606.ENSP00000325074,9606.ENSP00000340274,9606.ENSP00000344666,9606.ENSP00000345731,9606.ENSP00000346148,9606.ENSP00000349486,…	MYH9,VASP,TUBA4A,ACTN4,SLC9A3R1,ACTR3,TJP1,PRKCI,RAB8A,HSPA4,ROCK2,PRKAG1,PPP2R1A,PPP2R2A,RAP2C,NF2,DLG1,PRKAA1,SCRIB,ACTB,MSN,MYH10,ARHGEF2,EZR,F11R,RAB13,PARD6B,SRC,DLG3,ACTR2,PCNA,LLGL2,ACTN1,ITGB1,CDC42,NEDD4L,RDX,RHOA,TJP2,MYL6,ACTG1,MYL12B,TJP3,MYH14
HT29	cell&exo	15	hsa04520	Adherens junction	29	67	0.81	1.45e-11	9606.ENSP00000211998,9606.ENSP00000215832,9606.ENSP00000217244,9606.ENSP00000249071,9606.ENSP00000252483,9606.ENSP00000252699,9606.ENSP00000261769,9606.ENSP00000262506,9606.ENSP00000268035,9606.ENSP00000268182,9606.ENSP00000275493,9606.ENSP00000281537,9606.ENSP00000304669,9606.ENSP00000316338,9606.ENSP00000317272,9606.ENSP00000344456,9606.ENSP00000349960,9606.ENSP00000353030,9606.ENSP00000362680,…	VCL,MAPK1,CSNK2A1,RAC2,PVRL2,ACTN4,CDH1,CSNK2A2,IGF1R,IQGAP1,EGFR,TJP1,CTNNA1,BAIAP2,MET,CTNNB1,ACTB,PTPRF,SRC,CSNK2B,ACTN1,CTNND1,CDC42,CTNNA2,RHOA,LMO7,ACTG1,YES1,WASF2
HT29	cell&exo	16	hsa05016	Huntington disease	61	298	0.48	2.94e-11	9606.ENSP00000044462,9606.ENSP00000157812,9606.ENSP00000216455,9606.ENSP00000223321,9606.ENSP00000248437,9606.ENSP00000259457,9606.ENSP00000259708,9606.ENSP00000261303,9606.ENSP00000261479,9606.ENSP00000261712,9606.ENSP00000262030,9606.ENSP00000262193,9606.ENSP00000263774,9606.ENSP00000264639,9606.ENSP00000264932,9606.ENSP00000268379,9606.ENSP00000269305,9606.ENSP00000270586,9606.ENSP00000271308,…	PSMA4,PSMC4,PSMA3,PSMA2,TUBA4A,PSMB7,KLC4,PSMC1,PSMA6,PSMD11,ATP5B,PSMB1,NDUFS3,PSMD3,SDHA,UQCRC2,TP53,PSMB6,PSMA5,GNAQ,ATP5O,PSMB4,AP2M1,BAX,KIF5B,PSMD1,PSMD2,PSMC5,AP2A2,TUBB,TUBB4B,PSMD12,ATP5C1,CASP8,AP2A1,MTOR,MT-CO2,PSMB5,TGM2,ATP5F1,ACTR1A,PSMA7,SLC25A5,VDAC2,PSMB2,HDAC1,GPX2,ATP5A1,PSMD14,PSMC2,NDUFS1,PSMC6,PSMA1,VDAC3,PLCB3,ADRM1,CLTC,POLR2A,PSMC3,AP2B1,PSMB3
HT29	cell&exo	17	hsa04141	Protein processing in endoplasmic reticulum	43	165	0.59	8.22e-11	9606.ENSP00000233616,9606.ENSP00000237530,9606.ENSP00000243253,9606.ENSP00000247461,9606.ENSP00000254322,9606.ENSP00000256383,9606.ENSP00000259253,9606.ENSP00000261735,9606.ENSP00000286091,9606.ENSP00000293288,9606.ENSP00000295006,9606.ENSP00000296255,9606.ENSP00000296464,9606.ENSP00000299767,9606.ENSP00000300289,9606.ENSP00000303366,9606.ENSP00000306881,9606.ENSP00000314030,9606.ENSP00000317331,…	MOGS,RPN2,SEC61A1,CANX,DNAJB1,EIF2S1,UGGT1,ERP29,PDIA4,BAX,CAPN2,RPN1,HSPA4L,HSP90B1,PDIA3,LMAN2,SEC23A,DNAJA2,SSR4,HSPH1,CALR,HSPA5,CUL1,P4HB,HSP90AA1,SEC62,GANAB,RAD23B,VCP,HSP90AB1,HSPA1B,UBQLN1,CKAP4,TXNDC5,DNAJA1,STT3A,PDIA6,BCAP31,DDOST,CAPN1,HSPA8,PRKCSH,HYOU1
HT29	cell&exo	18	hsa04510	Focal adhesion	47	198	0.55	1.31e-10	9606.ENSP00000007722,9606.ENSP00000200181,9606.ENSP00000211998,9606.ENSP00000215832,9606.ENSP00000222399,9606.ENSP00000245932,9606.ENSP00000249071,9606.ENSP00000250559,9606.ENSP00000252699,9606.ENSP00000252999,9606.ENSP00000258341,9606.ENSP00000261023,9606.ENSP00000268035,9606.ENSP00000275493,9606.ENSP00000283249,9606.ENSP00000295006,9606.ENSP00000296181,9606.ENSP00000296585,9606.ENSP00000302486,…	ITGA3,ITGB4,VCL,MAPK1,LAMB1,VASP,RAC2,RAP1B,ACTN4,LAMA5,LAMC1,ITGAV,IGF1R,EGFR,ITGB6,CAPN2,ITGB5,ITGA2,MAP2K1,PAK2,TLN1,MET,ROCK2,ZYX,PPP1CA,PTK2,PPP1CC,PDPK1,CTNNB1,ACTB,FLNA,SRC,GRB2,ACTN1,PPP1CB,ITGB1,ILK,DIAPH1,CDC42,ARHGAP35,ITGA6,RHOA,FLNB,PIK3R1,ACTG1,MYL12B,PAK4
HT29	cell&exo	19	hsa05130	Pathogenic Escherichia coli infection	45	187	0.55	2.34e-10	9606.ENSP00000005260,9606.ENSP00000215832,9606.ENSP00000216181,9606.ENSP00000228825,9606.ENSP00000229239,9606.ENSP00000248437,9606.ENSP00000262613,9606.ENSP00000262942,9606.ENSP00000281537,9606.ENSP00000288235,9606.ENSP00000293288,9606.ENSP00000295685,9606.ENSP00000298316,9606.ENSP00000303145,9606.ENSP00000314067,9606.ENSP00000316338,9606.ENSP00000317985,9606.ENSP00000324527,9606.ENSP00000337261,…	BAIAP2L1,MAPK1,MYH9,ARPC3,GAPDH,TUBA4A,SLC9A3R1,ARPC1A,TJP1,MYO1E,BAX,ARPC2,ARF6,TMED10,PAK2,BAIAP2,ROCK2,MYO1D,ARHGEF1,TUBB,PTPN11,TUBB4B,ARPC5L,ACTB,CASP8,MYO1C,MYH10,NCKAP1,ARHGEF2,EZR,MYO6,SRC,ABI1,MYO1B,ITGB1,CDC42,RELA,ARPC4,ARPC1B,RHOA,GNA13,ACTG1,MYH14,CYFIP1,WASF2
HT29	cell&exo	20	hsa05017	Spinocerebellar ataxia	37	135	0.61	6.46e-10	9606.ENSP00000044462,9606.ENSP00000157812,9606.ENSP00000216455,9606.ENSP00000223321,9606.ENSP00000259457,9606.ENSP00000261303,9606.ENSP00000261479,9606.ENSP00000261712,9606.ENSP00000262193,9606.ENSP00000264639,9606.ENSP00000269143,9606.ENSP00000270586,9606.ENSP00000271308,9606.ENSP00000286548,9606.ENSP00000290541,9606.ENSP00000309474,9606.ENSP00000310129,9606.ENSP00000310572,9606.ENSP00000348442,…	PSMA4,PSMC4,PSMA3,PSMA2,PSMB7,PSMC1,PSMA6,PSMD11,PSMB1,PSMD3,AFG3L2,PSMB6,PSMA5,GNAQ,PSMB4,PSMD1,PSMD2,PSMC5,PSMD12,MTOR,PSMB5,PSMA7,SLC25A5,VDAC2,PSMB2,NOP56,PSMD14,PSMC2,PSMC6,PSMA1,PIK3R1,VDAC3,ATP2A2,PLCB3,ADRM1,PSMC3,PSMB3
HT29	cell&exo	21	hsa05131	Shigellosis	48	218	0.51	6.46e-10	9606.ENSP00000211998,9606.ENSP00000215832,9606.ENSP00000225655,9606.ENSP00000228825,9606.ENSP00000246533,9606.ENSP00000252699,9606.ENSP00000254810,9606.ENSP00000262942,9606.ENSP00000264893,9606.ENSP00000269305,9606.ENSP00000275493,9606.ENSP00000291552,9606.ENSP00000293288,9606.ENSP00000295006,9606.ENSP00000295685,9606.ENSP00000298316,9606.ENSP00000316029,9606.ENSP00000316176,9606.ENSP00000317985,…	VCL,MAPK1,PFN1,ARPC3,CAPNS1,ACTN4,H3F3B,ARPC1A,SEPT11,TP53,EGFR,U2AFBP,BAX,CAPN2,ARPC2,ARF6,TLN1,UBE2N,ROCK2,CUL1,PTK2,ARPC5L,ACTB,MTOR,ARHGEF2,SRC,SEPT8,SQSTM1,ACTN1,ITGB1,ILK,DIAPH1,CDC42,RELA,ARPC4,ARPC1B,SEPT9,CD44,RHOA,PIK3R1,UBE2V2,CAPN1,PLCB3,ACTG1,MYL12B,PLCD3,SEPT2,WASF2
HT29	cell&exo	22	hsa05205	Proteoglycans in cancer	45	196	0.53	7.71e-10	9606.ENSP00000215832,9606.ENSP00000225792,9606.ENSP00000246792,9606.ENSP00000256078,9606.ENSP00000256196,9606.ENSP00000261023,9606.ENSP00000262948,9606.ENSP00000264657,9606.ENSP00000268035,9606.ENSP00000268182,9606.ENSP00000269305,9606.ENSP00000275493,9606.ENSP00000290277,9606.ENSP00000296181,9606.ENSP00000296585,9606.ENSP00000302486,9606.ENSP00000317272,9606.ENSP00000317985,9606.ENSP00000326031,…	MAPK1,DDX5,RRAS,KRAS,RRAS2,ITGAV,MAP2K2,STAT3,IGF1R,IQGAP1,TP53,EGFR,ARAF,ITGB5,ITGA2,MAP2K1,MET,ROCK2,PPP1CA,ARHGEF1,PTPN11,PTK2,PPP1CC,PDPK1,CTNNB1,ACTB,MSN,MTOR,EZR,NRAS,FLNA,SRC,HSPG2,RPS6,GRB2,PPP1CB,ITGB1,CDC42,RDX,EIF4B,CD44,RHOA,FLNB,PIK3R1,ACTG1
HT29	cell&exo	23	hsa03040	Spliceosome	36	132	0.61	1.16e-09	9606.ENSP00000215829,9606.ENSP00000225792,9606.ENSP00000227524,9606.ENSP00000244020,9606.ENSP00000245838,9606.ENSP00000254193,9606.ENSP00000258962,9606.ENSP00000266079,9606.ENSP00000266735,9606.ENSP00000269349,9606.ENSP00000283179,9606.ENSP00000291552,9606.ENSP00000300413,9606.ENSP00000305556,9606.ENSP00000305790,9606.ENSP00000306614,9606.ENSP00000307863,9606.ENSP00000317123,9606.ENSP00000325376,…	SNRPD3,DDX5,PRPF19,SRSF6,THOC2,SNRPA1,SRSF1,PRPF6,SNRPF,EIF4A3,HNRNPU,U2AFBP,SNRPD1,PCBP1,SF3B3,PPIH,U2AF2,SNRNP200,HNRNPM,SRSF7,SF3B1,DHX15,HNRNPA1,SNRPD2,RBMX,SF3A3,SRSF3,HSPA1B,HNRNPK,SRSF2,EFTUD2,SNRPB,DDX46,TRA2B,HSPA8,PRPF8
HT29	cell&exo	24	hsa00010	Glycolysis / Gluconeogenesis	24	65	0.74	1.18e-08	9606.ENSP00000205402,9606.ENSP00000226253,9606.ENSP00000229239,9606.ENSP00000229270,9606.ENSP00000234590,9606.ENSP00000261733,9606.ENSP00000269848,9606.ENSP00000280346,9606.ENSP00000296412,9606.ENSP00000316924,9606.ENSP00000320171,9606.ENSP00000324105,9606.ENSP00000345771,9606.ENSP00000345774,9606.ENSP00000346827,9606.ENSP00000359991,9606.ENSP00000361140,9606.ENSP00000362413,9606.ENSP00000370517,…	DLD,ALDOC,GAPDH,TPI1,ENO1,ALDH2,PFKL,DLAT,ADH5,ACSS1,PKM,ENO3,PFKM,ALDH3A2,ALDH9A1,PGAM1,AKR1A1,PGK1,PFKP,ALDOA,LDHB,ALDH7A1,GPI,LDHA
HT29	cell&exo	25	hsa05230	Central carbon metabolism in cancer	24	69	0.71	3e-08	9606.ENSP00000215832,9606.ENSP00000256078,9606.ENSP00000261622,9606.ENSP00000262948,9606.ENSP00000269305,9606.ENSP00000269848,9606.ENSP00000275493,9606.ENSP00000302486,9606.ENSP00000317272,9606.ENSP00000320171,9606.ENSP00000331897,9606.ENSP00000345771,9606.ENSP00000354558,9606.ENSP00000358548,9606.ENSP00000359991,9606.ENSP00000370517,9606.ENSP00000377192,9606.ENSP00000379386,9606.ENSP00000390265,…	MAPK1,KRAS,SLC7A5,MAP2K2,TP53,PFKL,EGFR,MAP2K1,MET,PKM,IDH2,PFKM,MTOR,NRAS,PGAM1,PFKP,G6PD,LDHB,IDH1,SLC2A1,PIK3R1,SLC1A5,LDHA,SLC16A3
HT29	cell&exo	26	hsa00620	Pyruvate metabolism	18	38	0.85	6.54e-08	9606.ENSP00000205402,9606.ENSP00000261733,9606.ENSP00000265838,9606.ENSP00000280346,9606.ENSP00000316924,9606.ENSP00000320171,9606.ENSP00000327070,9606.ENSP00000345774,9606.ENSP00000346827,9606.ENSP00000355518,9606.ENSP00000356015,9606.ENSP00000362463,9606.ENSP00000377532,9606.ENSP00000379386,9606.ENSP00000387123,9606.ENSP00000438144,9606.ENSP00000445175,9606.ENSP00000483300	DLD,ALDH2,ACAT1,DLAT,ACSS1,PKM,MDH2,ALDH3A2,ALDH9A1,FH,ACAT2,GLO1,PC,LDHB,ALDH7A1,MDH1,LDHA,ACACA
HT29	cell&exo	27	hsa05203	Viral carcinogenesis	39	182	0.5	6.54e-08	9606.ENSP00000215832,9606.ENSP00000244537,9606.ENSP00000248975,9606.ENSP00000252699,9606.ENSP00000256078,9606.ENSP00000261303,9606.ENSP00000264335,9606.ENSP00000264657,9606.ENSP00000269305,9606.ENSP00000293288,9606.ENSP00000301764,9606.ENSP00000306330,9606.ENSP00000320171,9606.ENSP00000343204,9606.ENSP00000343535,9606.ENSP00000345731,9606.ENSP00000346762,9606.ENSP00000349486,9606.ENSP00000349508,…	MAPK1,HIST1H4F,YWHAH,ACTN4,KRAS,PSMC1,YWHAE,STAT3,TP53,BAX,DDB1,YWHAG,PKM,JAK1,USP7,DLG1,SND1,SCRIB,CHD4,CASP8,NRAS,YWHAB,HDAC1,SRC,UBR4,SYK,HNRNPK,YWHAQ,GRB2,ACTN1,CDK1,YWHAZ,HLA-A,DDX3X,CDC42,RELA,RHOA,PIK3R1,VDAC3
HT29	cell&exo	28	hsa00020	Citrate cycle (TCA cycle)	16	29	0.91	8.04e-08	9606.ENSP00000205402,9606.ENSP00000216254,9606.ENSP00000253792,9606.ENSP00000264932,9606.ENSP00000280346,9606.ENSP00000299518,9606.ENSP00000309477,9606.ENSP00000327070,9606.ENSP00000331897,9606.ENSP00000335304,9606.ENSP00000342056,9606.ENSP00000355518,9606.ENSP00000377446,9606.ENSP00000377532,9606.ENSP00000390265,9606.ENSP00000438144	DLD,ACO2,ACLY,SDHA,DLAT,IDH3A,ACO1,MDH2,IDH2,DLST,CS,FH,SUCLG1,PC,IDH1,MDH1
HT29	cell&exo	29	hsa03013	RNA transport	36	160	0.52	8.04e-08	9606.ENSP00000216190,9606.ENSP00000220849,9606.ENSP00000240185,9606.ENSP00000245838,9606.ENSP00000253039,9606.ENSP00000256383,9606.ENSP00000261868,9606.ENSP00000269349,9606.ENSP00000289371,9606.ENSP00000290158,9606.ENSP00000293831,9606.ENSP00000306117,9606.ENSP00000310668,9606.ENSP00000313007,9606.ENSP00000319169,9606.ENSP00000321706,9606.ENSP00000326261,9606.ENSP00000326381,9606.ENSP00000339063,…	EIF3D,EIF3E,TARDBP,THOC2,EIF2S3,EIF2S1,EIF3J,EIF4A3,EIF5B,KPNB1,EIF4A1,DDX19A,NUP93,PABPC1,PRMT5,GEMIN4,SRRM1,EIF4A2,EEF1A1,EIF3B,EIF3A,DDX20,NUP188,EIF3I,EIF1AX,SEH1L,XPO1,EIF4B,EIF2B4,RANGAP1,EIF4G1,EIF3F,EIF4G2,RAN,UPF1,CYFIP1
HT29	cell&exo	30	hsa05165	Human papillomavirus infection	55	325	0.4	8.85e-08	9606.ENSP00000007722,9606.ENSP00000200181,9606.ENSP00000215832,9606.ENSP00000222399,9606.ENSP00000234396,9606.ENSP00000251413,9606.ENSP00000252999,9606.ENSP00000256078,9606.ENSP00000258341,9606.ENSP00000261023,9606.ENSP00000261303,9606.ENSP00000262187,9606.ENSP00000262613,9606.ENSP00000262948,9606.ENSP00000264649,9606.ENSP00000269305,9606.ENSP00000273398,9606.ENSP00000275493,9606.ENSP00000276390,…	ITGA3,ITGB4,MAPK1,LAMB1,ATP6V1B1,TUBG1,LAMA5,KRAS,LAMC1,ITGAV,PSMC1,RHEB,SLC9A3R1,MAP2K2,ATP6V0A1,TP53,ATP6V1A,EGFR,ATP6V1B2,ITGB6,BAX,PRKCI,ITGB5,ITGA2,MAP2K1,PKM,PPP2R1A,PPP2R2A,PTK2,JAK1,CTNNB1,DLG1,SCRIB,CHD4,CASP8,ATP6V1H,STAT1,MTOR,NRAS,GNAS,PARD6B,HDAC1,DLG3,UBR4,ISG15,LLGL2,GRB2,ITGB1,HLA-A,CDC42,RELA,ITGA6,BCAP31,PPP2R5D,PIK3R1
HT29	cell&exo	31	hsa04670	Leukocyte transendothelial migration	28	109	0.58	3.17e-07	9606.ENSP00000211998,9606.ENSP00000245932,9606.ENSP00000249071,9606.ENSP00000250559,9606.ENSP00000252699,9606.ENSP00000278927,9606.ENSP00000304669,9606.ENSP00000312999,9606.ENSP00000317985,9606.ENSP00000340944,9606.ENSP00000341189,9606.ENSP00000343027,9606.ENSP00000344456,9606.ENSP00000349960,9606.ENSP00000353408,9606.ENSP00000356042,9606.ENSP00000357005,9606.ENSP00000358867,9606.ENSP00000377941,…	VCL,VASP,RAC2,RAP1B,ACTN4,ESAM,CTNNA1,GNAI2,ROCK2,PTPN11,PTK2,GNAI1,CTNNB1,ACTB,MSN,EZR,F11R,GNAI3,ACTN1,ITGB1,CTNND1,CDC42,CTNNA2,ARHGAP35,RHOA,PIK3R1,ACTG1,MYL12B
HT29	cell&exo	32	hsa00970	Aminoacyl-tRNA biosynthesis	18	44	0.78	3.22e-07	9606.ENSP00000231572,9606.ENSP00000234677,9606.ENSP00000256854,9606.ENSP00000261772,9606.ENSP00000262027,9606.ENSP00000264161,9606.ENSP00000281828,9606.ENSP00000307567,9606.ENSP00000325448,9606.ENSP00000347495,9606.ENSP00000355890,9606.ENSP00000362576,9606.ENSP00000364794,9606.ENSP00000364815,9606.ENSP00000369897,9606.ENSP00000373918,9606.ENSP00000377954,9606.ENSP00000387710	RARS,SARS,NARS,AARS,MARS,DARS,FARSB,QARS,KARS,WARS,EPRS,YARS,IARS,VARS,CARS,GARS,LARS,TARS
HT29	cell&exo	33	hsa00270	Cysteine and methionine metabolism	18	49	0.74	1.17e-06	9606.ENSP00000216951,9606.ENSP00000217426,9606.ENSP00000229416,9606.ENSP00000245206,9606.ENSP00000303147,9606.ENSP00000325425,9606.ENSP00000327070,9606.ENSP00000358417,9606.ENSP00000358814,9606.ENSP00000359539,9606.ENSP00000365773,9606.ENSP00000366156,9606.ENSP00000369519,9606.ENSP00000379386,9606.ENSP00000380402,9606.ENSP00000385746,9606.ENSP00000438144,9606.ENSP00000445175	GSS,AHCY,GCLC,GOT2,MAT2A,MAT2B,MDH2,PHGDH,AHCYL1,GOT1,PSAT1,SRM,MTAP,LDHB,MPST,SMS,MDH1,LDHA
HT29	cell&exo	34	hsa04145	Phagosome	31	142	0.51	1.3e-06	9606.ENSP00000219150,9606.ENSP00000234396,9606.ENSP00000243253,9606.ENSP00000247461,9606.ENSP00000248437,9606.ENSP00000261023,9606.ENSP00000261693,9606.ENSP00000264649,9606.ENSP00000265062,9606.ENSP00000273047,9606.ENSP00000273130,9606.ENSP00000273398,9606.ENSP00000276390,9606.ENSP00000296181,9606.ENSP00000296585,9606.ENSP00000320866,9606.ENSP00000331201,9606.ENSP00000333298,9606.ENSP00000339001,…	CORO1A,ATP6V1B1,SEC61A1,CANX,TUBA4A,ITGAV,SCARB1,ATP6V0A1,RAB7A,RAB5A,DYNC1LI1,ATP6V1A,ATP6V1B2,ITGB5,ITGA2,CALR,HGS,LAMP1,TUBB,TUBB4B,DYNC1H1,ACTB,ATP6V1H,TFRC,RAB5B,STX7,ITGB1,HLA-A,RAB5C,ACTG1,SEC22B
HT29	cell&exo	35	hsa05163	Human cytomegalovirus infection	40	218	0.43	1.3e-06	9606.ENSP00000078429,9606.ENSP00000215832,9606.ENSP00000249071,9606.ENSP00000256078,9606.ENSP00000261023,9606.ENSP00000262187,9606.ENSP00000262948,9606.ENSP00000264657,9606.ENSP00000269305,9606.ENSP00000272298,9606.ENSP00000275493,9606.ENSP00000286548,9606.ENSP00000293288,9606.ENSP00000300289,9606.ENSP00000302486,9606.ENSP00000305260,9606.ENSP00000312999,9606.ENSP00000317985,9606.ENSP00000320866,…	GNA11,MAPK1,RAC2,KRAS,ITGAV,RHEB,MAP2K2,STAT3,TP53,CALM2,EGFR,GNAQ,BAX,PDIA3,MAP2K1,GNB2,GNAI2,ROCK2,CALR,ARHGEF1,PTK2,GNAI1,JAK1,CTNNB1,CASP8,MTOR,NRAS,GNAI3,GNG12,GNAS,SRC,GRB2,PPP3CA,HLA-A,RELA,RHOA,GNA13,PIK3R1,PLCB3,GNB1
HT29	cell&exo	36	hsa04360	Axon guidance	35	177	0.47	1.61e-06	9606.ENSP00000204961,9606.ENSP00000215832,9606.ENSP00000246792,9606.ENSP00000249071,9606.ENSP00000256078,9606.ENSP00000274376,9606.ENSP00000309539,9606.ENSP00000312999,9606.ENSP00000314067,9606.ENSP00000317272,9606.ENSP00000317985,9606.ENSP00000340944,9606.ENSP00000341189,9606.ENSP00000343027,9606.ENSP00000350896,9606.ENSP00000351209,9606.ENSP00000355809,9606.ENSP00000356000,9606.ENSP00000358548,…	EFNB1,MAPK1,RRAS,RAC2,KRAS,RASA1,DPYSL2,GNAI2,PAK2,MET,ROCK2,PTPN11,PTK2,GNAI1,EPHB4,EPHA2,ENAH,PLXNA2,NRAS,GNAI3,PARD6B,SRC,PLXNA1,PPP3CA,ITGB1,ILK,CDC42,RHOA,PLXNB2,CDK5,PIK3R1,CFL1,SRGAP2,MYL12B,PAK4
HT29	cell&exo	37	hsa04611	Platelet activation	28	122	0.53	1.99e-06	9606.ENSP00000215832,9606.ENSP00000245932,9606.ENSP00000249647,9606.ENSP00000250559,9606.ENSP00000286548,9606.ENSP00000295797,9606.ENSP00000296585,9606.ENSP00000312999,9606.ENSP00000316029,9606.ENSP00000317985,9606.ENSP00000326031,9606.ENSP00000337261,9606.ENSP00000341779,9606.ENSP00000343027,9606.ENSP00000349960,9606.ENSP00000358867,9606.ENSP00000360141,9606.ENSP00000362680,9606.ENSP00000364907,…	MAPK1,VASP,SNAP23,RAP1B,GNAQ,PRKCI,ITGA2,GNAI2,TLN1,ROCK2,PPP1CA,ARHGEF1,PPP1CC,GNAI1,ACTB,GNAI3,GNAS,SRC,SYK,PPP1CB,ITGB1,ARHGAP35,RHOA,GNA13,PIK3R1,PLCB3,ACTG1,MYL12B
HT29	cell&exo	38	hsa00071	Fatty acid degradation	16	42	0.75	3.43e-06	9606.ENSP00000261733,9606.ENSP00000265838,9606.ENSP00000285093,9606.ENSP00000296412,9606.ENSP00000301729,9606.ENSP00000325136,9606.ENSP00000339787,9606.ENSP00000345774,9606.ENSP00000346827,9606.ENSP00000348429,9606.ENSP00000350012,9606.ENSP00000356015,9606.ENSP00000357535,9606.ENSP00000370023,9606.ENSP00000387123,9606.ENSP00000438689	ALDH2,ACAT1,ACAA2,ADH5,ECI1,HADHB,ACSL4,ALDH3A2,ALDH9A1,ACSL5,ACSL3,ACAT2,ECHS1,HADHA,ALDH7A1,ACADVL
HT29	cell&exo	39	hsa05170	Human immunodeficiency virus 1 infection	37	204	0.43	4.35e-06	9606.ENSP00000078429,9606.ENSP00000215832,9606.ENSP00000249071,9606.ENSP00000250244,9606.ENSP00000256078,9606.ENSP00000262306,9606.ENSP00000262878,9606.ENSP00000262948,9606.ENSP00000272298,9606.ENSP00000286548,9606.ENSP00000293288,9606.ENSP00000300289,9606.ENSP00000301764,9606.ENSP00000302486,9606.ENSP00000305260,9606.ENSP00000312999,9606.ENSP00000314067,9606.ENSP00000320866,9606.ENSP00000326804,…	GNA11,MAPK1,RAC2,AP1M2,KRAS,TCEB2,SAMHD1,MAP2K2,CALM2,GNAQ,BAX,PDIA3,DDB1,MAP2K1,GNB2,GNAI2,PAK2,CALR,CUL1,AP1S1,PTK2,GNAI1,MAP2K3,AP1B1,CASP8,MTOR,NRAS,GNAI3,GNG12,PPP3CA,CDK1,HLA-A,RELA,PIK3R1,CFL1,PAK4,GNB1
HT29	cell&exo	40	hsa04910	Insulin signaling pathway	28	133	0.49	8.28e-06	9606.ENSP00000215832,9606.ENSP00000216392,9606.ENSP00000216962,9606.ENSP00000256078,9606.ENSP00000262187,9606.ENSP00000262948,9606.ENSP00000265563,9606.ENSP00000272298,9606.ENSP00000290277,9606.ENSP00000295797,9606.ENSP00000302486,9606.ENSP00000304592,9606.ENSP00000323867,9606.ENSP00000326031,9606.ENSP00000334100,9606.ENSP00000341779,9606.ENSP00000344220,9606.ENSP00000346148,9606.ENSP00000353030,…	MAPK1,PYGL,PYGB,KRAS,RHEB,MAP2K2,PRKAR2A,CALM2,ARAF,PRKCI,MAP2K1,FASN,PRKAG1,PPP1CA,EXOC7,PPP1CC,PDPK1,PRKAA1,PTPRF,MTOR,NRAS,FLOT1,RPS6,GRB2,FLOT2,PPP1CB,PIK3R1,ACACA
HT29	cell&exo	41	hsa00280	Valine, leucine and isoleucine degradation	16	46	0.71	8.45e-06	9606.ENSP00000168216,9606.ENSP00000205402,9606.ENSP00000261733,9606.ENSP00000265395,9606.ENSP00000265838,9606.ENSP00000285093,9606.ENSP00000324842,9606.ENSP00000325136,9606.ENSP00000343657,9606.ENSP00000345774,9606.ENSP00000346827,9606.ENSP00000356015,9606.ENSP00000357535,9606.ENSP00000370023,9606.ENSP00000387123,9606.ENSP00000418397	HSD17B10,DLD,ALDH2,HIBADH,ACAT1,ACAA2,AACS,HADHB,MCCC2,ALDH3A2,ALDH9A1,ACAT2,ECHS1,HADHA,ALDH7A1,IVD
HT29	cell&exo	42	hsa04015	Rap1 signaling pathway	36	202	0.42	8.45e-06	9606.ENSP00000215832,9606.ENSP00000225655,9606.ENSP00000245932,9606.ENSP00000246792,9606.ENSP00000249071,9606.ENSP00000250559,9606.ENSP00000256078,9606.ENSP00000261769,9606.ENSP00000262948,9606.ENSP00000268035,9606.ENSP00000272298,9606.ENSP00000275493,9606.ENSP00000286548,9606.ENSP00000295797,9606.ENSP00000302486,9606.ENSP00000312999,9606.ENSP00000316029,9606.ENSP00000317272,9606.ENSP00000343027,…	MAPK1,PFN1,VASP,RRAS,RAC2,RAP1B,KRAS,CDH1,MAP2K2,IGF1R,CALM2,EGFR,GNAQ,PRKCI,MAP2K1,GNAI2,TLN1,MET,GNAI1,CTNNB1,MAP2K3,ACTB,EPHA2,ENAH,NRAS,GNAI3,GNAS,PARD6B,SRC,ITGB1,CTNND1,CDC42,RHOA,PIK3R1,PLCB3,ACTG1
HT29	cell&exo	43	hsa00030	Pentose phosphate pathway	13	29	0.82	8.79e-06	9606.ENSP00000226253,9606.ENSP00000252603,9606.ENSP00000269848,9606.ENSP00000270776,9606.ENSP00000283646,9606.ENSP00000321259,9606.ENSP00000345771,9606.ENSP00000361512,9606.ENSP00000370517,9606.ENSP00000377192,9606.ENSP00000378669,9606.ENSP00000391481,9606.ENSP00000405573	ALDOC,PGLS,PFKL,PGD,RPIA,TALDO1,PFKM,PRPS1,PFKP,G6PD,ALDOA,TKT,GPI
HT29	cell&exo	44	hsa04919	Thyroid hormone signaling pathway	26	119	0.51	1e-05	9606.ENSP00000215832,9606.ENSP00000256078,9606.ENSP00000261023,9606.ENSP00000262187,9606.ENSP00000262948,9606.ENSP00000269305,9606.ENSP00000269848,9606.ENSP00000302486,9606.ENSP00000344220,9606.ENSP00000344456,9606.ENSP00000345771,9606.ENSP00000349960,9606.ENSP00000354394,9606.ENSP00000354558,9606.ENSP00000356790,9606.ENSP00000358548,9606.ENSP00000362649,9606.ENSP00000362680,9606.ENSP00000370517,…	MAPK1,KRAS,ITGAV,RHEB,MAP2K2,TP53,PFKL,MAP2K1,PDPK1,CTNNB1,PFKM,ACTB,STAT1,MTOR,ATP1B1,NRAS,HDAC1,SRC,PFKP,SLC2A1,PIK3R1,ATP2A2,PLCB3,ATP1A1,ACTG1,PLCD3
HT29	cell&exo	45	hsa04066	HIF-1 signaling pathway	24	106	0.52	1.45e-05	9606.ENSP00000215832,9606.ENSP00000226253,9606.ENSP00000229239,9606.ENSP00000234590,9606.ENSP00000262306,9606.ENSP00000262948,9606.ENSP00000264657,9606.ENSP00000268035,9606.ENSP00000269848,9606.ENSP00000275493,9606.ENSP00000302486,9606.ENSP00000324105,9606.ENSP00000345771,9606.ENSP00000353224,9606.ENSP00000354558,9606.ENSP00000362413,9606.ENSP00000369757,9606.ENSP00000370517,9606.ENSP00000378669,…	MAPK1,ALDOC,GAPDH,ENO1,TCEB2,MAP2K2,STAT3,IGF1R,PFKL,EGFR,MAP2K1,ENO3,PFKM,TFRC,MTOR,PGK1,RPS6,PFKP,ALDOA,LDHB,RELA,SLC2A1,PIK3R1,LDHA
HT29	cell&exo	46	hsa04217	Necroptosis	29	149	0.46	1.84e-05	9606.ENSP00000216392,9606.ENSP00000216962,9606.ENSP00000217402,9606.ENSP00000238497,9606.ENSP00000254950,9606.ENSP00000264657,9606.ENSP00000273550,9606.ENSP00000287295,9606.ENSP00000293288,9606.ENSP00000295006,9606.ENSP00000308405,9606.ENSP00000324205,9606.ENSP00000332194,9606.ENSP00000335153,9606.ENSP00000343204,9606.ENSP00000345347,9606.ENSP00000351273,9606.ENSP00000354394,9606.ENSP00000355759,…	PYGL,PYGB,CHMP4B,VPS4B,VPS4A,STAT3,FTH1,AIFM1,BAX,CAPN2,H2AFV,CHMP4A,HIST2H2AC,HSP90AA1,JAK1,HMGB1,CASP8,STAT1,PARP1,HSP90AB1,SLC25A5,VDAC2,SQSTM1,PPIA,H2AFY,VDAC3,CAPN1,PGAM5,DNM1L
HT29	cell&exo	47	hsa05213	Endometrial cancer	17	57	0.64	2e-05	9606.ENSP00000215832,9606.ENSP00000256078,9606.ENSP00000261769,9606.ENSP00000262948,9606.ENSP00000269305,9606.ENSP00000275493,9606.ENSP00000290277,9606.ENSP00000293288,9606.ENSP00000302486,9606.ENSP00000304669,9606.ENSP00000344220,9606.ENSP00000344456,9606.ENSP00000358548,9606.ENSP00000376345,9606.ENSP00000379975,9606.ENSP00000384638,9606.ENSP00000428056	MAPK1,KRAS,CDH1,MAP2K2,TP53,EGFR,ARAF,BAX,MAP2K1,CTNNA1,PDPK1,CTNNB1,NRAS,GRB2,ILK,CTNNA2,PIK3R1
HT29	cell&exo	48	hsa05135	Yersinia infection	26	125	0.49	2.02e-05	9606.ENSP00000215832,9606.ENSP00000249071,9606.ENSP00000262948,9606.ENSP00000263238,9606.ENSP00000286548,9606.ENSP00000298316,9606.ENSP00000302486,9606.ENSP00000316338,9606.ENSP00000317985,9606.ENSP00000337261,9606.ENSP00000339467,9606.ENSP00000341189,9606.ENSP00000345083,9606.ENSP00000349960,9606.ENSP00000359552,9606.ENSP00000362680,9606.ENSP00000367220,9606.ENSP00000368884,9606.ENSP00000379350,…	MAPK1,RAC2,MAP2K2,ACTR3,GNAQ,ARF6,MAP2K1,BAIAP2,ROCK2,ARHGEF1,RHOG,PTK2,MAP2K3,ACTB,PKN2,SRC,ACTR2,RPS6KA3,ITGB1,CDC42,RELA,RHOA,PIK3R1,RPS6KA1,ACTG1,WASF2
HT29	cell&exo	49	hsa04540	Gap junction	21	87	0.55	2.44e-05	9606.ENSP00000078429,9606.ENSP00000215832,9606.ENSP00000248437,9606.ENSP00000256078,9606.ENSP00000262948,9606.ENSP00000275493,9606.ENSP00000281537,9606.ENSP00000286548,9606.ENSP00000302486,9606.ENSP00000312999,9606.ENSP00000324464,9606.ENSP00000339001,9606.ENSP00000341289,9606.ENSP00000343027,9606.ENSP00000358548,9606.ENSP00000358867,9606.ENSP00000360141,9606.ENSP00000362680,9606.ENSP00000376345,…	GNA11,MAPK1,TUBA4A,KRAS,MAP2K2,EGFR,TJP1,GNAQ,MAP2K1,GNAI2,CSNK1D,TUBB,TUBB4B,GNAI1,NRAS,GNAI3,GNAS,SRC,GRB2,CDK1,PLCB3
HT29	cell&exo	50	hsa00230	Purine metabolism	26	127	0.48	2.49e-05	9606.ENSP00000236959,9606.ENSP00000256578,9606.ENSP00000257770,9606.ENSP00000264220,9606.ENSP00000286621,9606.ENSP00000298556,9606.ENSP00000300738,9606.ENSP00000313490,9606.ENSP00000320171,9606.ENSP00000321584,9606.ENSP00000345096,9606.ENSP00000354532,9606.ENSP00000355493,9606.ENSP00000355689,9606.ENSP00000361512,9606.ENSP00000362271,9606.ENSP00000367615,9606.ENSP00000371230,9606.ENSP00000371253,…	ATIC,AMPD2,NT5E,PPAT,ADK,HPRT1,RRM1,PFAS,PKM,IMPDH2,IMPDH1,PNP,ADSS,GUK1,PRPS1,AK1,APRT,AK3,GART,NME1-NME2,AK4,PAICS,PAPSS2,NUDT5,GMPS,ADSL
HT29	cell&exo	51	hsa01212	Fatty acid metabolism	16	54	0.64	3.85e-05	9606.ENSP00000215567,9606.ENSP00000265838,9606.ENSP00000278353,9606.ENSP00000285093,9606.ENSP00000304592,9606.ENSP00000325136,9606.ENSP00000339787,9606.ENSP00000348429,9606.ENSP00000350012,9606.ENSP00000356015,9606.ENSP00000357535,9606.ENSP00000360569,9606.ENSP00000370023,9606.ENSP00000420914,9606.ENSP00000438689,9606.ENSP00000483300	TECR,ACAT1,HSD17B12,ACAA2,FASN,HADHB,ACSL4,ACSL5,ACSL3,ACAT2,ECHS1,SCP2,HADHA,HSD17B4,ACADVL,ACACA
HT29	cell&exo	52	hsa00330	Arginine and proline metabolism	15	48	0.66	4.3e-05	9606.ENSP00000226299,9606.ENSP00000245206,9606.ENSP00000261733,9606.ENSP00000263556,9606.ENSP00000325548,9606.ENSP00000342502,9606.ENSP00000345774,9606.ENSP00000346827,9606.ENSP00000359539,9606.ENSP00000360268,9606.ENSP00000364490,9606.ENSP00000366156,9606.ENSP00000367309,9606.ENSP00000385746,9606.ENSP00000387123	LAP3,GOT2,ALDH2,P4HA1,CNDP2,PYCR2,ALDH3A2,ALDH9A1,GOT1,ALDH18A1,ALDH4A1,SRM,MAOB,SMS,ALDH7A1
HT29	cell&exo	53	hsa04151	PI3K-Akt signaling pathway	49	350	0.32	4.3e-05	9606.ENSP00000007722,9606.ENSP00000200181,9606.ENSP00000215832,9606.ENSP00000222399,9606.ENSP00000248975,9606.ENSP00000252999,9606.ENSP00000256078,9606.ENSP00000258341,9606.ENSP00000261023,9606.ENSP00000262187,9606.ENSP00000262948,9606.ENSP00000264335,9606.ENSP00000268035,9606.ENSP00000269305,9606.ENSP00000275493,9606.ENSP00000283249,9606.ENSP00000296181,9606.ENSP00000296585,9606.ENSP00000299767,…	ITGA3,ITGB4,MAPK1,LAMB1,YWHAH,LAMA5,KRAS,LAMC1,ITGAV,RHEB,MAP2K2,YWHAE,IGF1R,TP53,EGFR,ITGB6,ITGB5,ITGA2,HSP90B1,MAP2K1,GNB2,YWHAG,MET,PPP2R1A,PPP2R2A,HSP90AA1,PTK2,JAK1,PDPK1,PRKAA1,EPHA2,MTOR,NRAS,PKN2,GNG12,HSP90AB1,YWHAB,SYK,RPS6,YWHAQ,GRB2,YWHAZ,ITGB1,RELA,ITGA6,EIF4B,PPP2R5D,PIK3R1,GNB1
HT29	cell&exo	54	hsa05412	Arrhythmogenic right ventricular cardiomyopathy	19	76	0.57	4.3e-05	9606.ENSP00000007722,9606.ENSP00000070846,9606.ENSP00000200181,9606.ENSP00000261023,9606.ENSP00000261590,9606.ENSP00000283249,9606.ENSP00000296181,9606.ENSP00000296585,9606.ENSP00000304669,9606.ENSP00000344456,9606.ENSP00000349960,9606.ENSP00000357283,9606.ENSP00000369129,9606.ENSP00000377508,9606.ENSP00000379350,9606.ENSP00000384638,9606.ENSP00000386896,9606.ENSP00000440045,9606.ENSP00000458162	ITGA3,PKP2,ITGB4,ITGAV,DSG2,ITGB6,ITGB5,ITGA2,CTNNA1,CTNNB1,ACTB,LMNA,DSP,JUP,ITGB1,CTNNA2,ITGA6,ATP2A2,ACTG1
HT29	cell&exo	55	hsa05200	Pathways in cancer	64	517	0.26	6.77e-05	9606.ENSP00000007722,9606.ENSP00000078429,9606.ENSP00000215832,9606.ENSP00000222399,9606.ENSP00000249071,9606.ENSP00000252999,9606.ENSP00000256078,9606.ENSP00000258341,9606.ENSP00000261023,9606.ENSP00000261769,9606.ENSP00000262306,9606.ENSP00000262948,9606.ENSP00000264657,9606.ENSP00000268035,9606.ENSP00000269305,9606.ENSP00000272298,9606.ENSP00000275493,9606.ENSP00000286548,9606.ENSP00000290277,…	ITGA3,GNA11,MAPK1,LAMB1,RAC2,LAMA5,KRAS,LAMC1,ITGAV,CDH1,TCEB2,MAP2K2,STAT3,IGF1R,TP53,CALM2,EGFR,GNAQ,ARAF,CTBP1,BAX,ITGA2,HSP90B1,MAP2K1,CTNNA1,GNB2,GNAI2,MET,ROCK2,EML4,CUL1,HSP90AA1,ARHGEF1,PTK2,GNAI1,JAK1,CTNNB1,CASP8,STAT1,MTOR,FH,TPM3,NRAS,GSTO1,GNAI3,GNG12,GNAS,HSP90AB1,STK4,HDAC1,GRB2,JUP,ITGB1,CDC42,RELA,CTNNA2,ITGA6,RHOA,GNA13,SLC2A1,PIK3R1,TXNRD1,PLCB3,GNB1
HT29	cell&exo	56	hsa00051	Fructose and mannose metabolism	12	32	0.74	7.52e-05	9606.ENSP00000226253,9606.ENSP00000229270,9606.ENSP00000267814,9606.ENSP00000268261,9606.ENSP00000269848,9606.ENSP00000288078,9606.ENSP00000345771,9606.ENSP00000350949,9606.ENSP00000352584,9606.ENSP00000370194,9606.ENSP00000370517,9606.ENSP00000378669	ALDOC,TPI1,SORD,PMM2,PFKL,FUK,PFKM,GMPPA,AKR1B10,GMDS,PFKP,ALDOA
HT29	cell&exo	57	hsa05160	Hepatitis C	28	156	0.42	8.3e-05	9606.ENSP00000215832,9606.ENSP00000220849,9606.ENSP00000248975,9606.ENSP00000256078,9606.ENSP00000256383,9606.ENSP00000261693,9606.ENSP00000262948,9606.ENSP00000264335,9606.ENSP00000264657,9606.ENSP00000269305,9606.ENSP00000275493,9606.ENSP00000290277,9606.ENSP00000293288,9606.ENSP00000302486,9606.ENSP00000306330,9606.ENSP00000324804,9606.ENSP00000325074,9606.ENSP00000343204,9606.ENSP00000344456,…	MAPK1,EIF3E,YWHAH,KRAS,EIF2S1,SCARB1,MAP2K2,YWHAE,STAT3,TP53,EGFR,ARAF,BAX,MAP2K1,YWHAG,PPP2R1A,PPP2R2A,JAK1,CTNNB1,CASP8,STAT1,NRAS,YWHAB,YWHAQ,GRB2,YWHAZ,RELA,PIK3R1
HT29	cell&exo	58	hsa05211	Renal cell carcinoma	17	66	0.58	8.36e-05	9606.ENSP00000215832,9606.ENSP00000250559,9606.ENSP00000256078,9606.ENSP00000262306,9606.ENSP00000262948,9606.ENSP00000290277,9606.ENSP00000302486,9606.ENSP00000314067,9606.ENSP00000317272,9606.ENSP00000340944,9606.ENSP00000355518,9606.ENSP00000358548,9606.ENSP00000376345,9606.ENSP00000383118,9606.ENSP00000416293,9606.ENSP00000428056,9606.ENSP00000469413	MAPK1,RAP1B,KRAS,TCEB2,MAP2K2,ARAF,MAP2K1,PAK2,MET,PTPN11,FH,NRAS,GRB2,CDC42,SLC2A1,PIK3R1,PAK4
HT29	cell&exo	59	hsa04730	Long-term depression	16	59	0.6	8.51e-05	9606.ENSP00000078429,9606.ENSP00000215832,9606.ENSP00000256078,9606.ENSP00000262948,9606.ENSP00000268035,9606.ENSP00000286548,9606.ENSP00000290277,9606.ENSP00000302486,9606.ENSP00000312999,9606.ENSP00000324804,9606.ENSP00000343027,9606.ENSP00000358548,9606.ENSP00000358867,9606.ENSP00000360141,9606.ENSP00000400717,9606.ENSP00000443631	GNA11,MAPK1,KRAS,MAP2K2,IGF1R,GNAQ,ARAF,MAP2K1,GNAI2,PPP2R1A,GNAI1,NRAS,GNAI3,GNAS,GNA13,PLCB3
HT29	cell&exo	60	hsa00480	Glutathione metabolism	15	53	0.62	0.0001	9606.ENSP00000216951,9606.ENSP00000226299,9606.ENSP00000229416,9606.ENSP00000270776,9606.ENSP00000275428,9606.ENSP00000300738,9606.ENSP00000331897,9606.ENSP00000342026,9606.ENSP00000358727,9606.ENSP00000360688,9606.ENSP00000366156,9606.ENSP00000374265,9606.ENSP00000377192,9606.ENSP00000385746,9606.ENSP00000390265	GSS,LAP3,GCLC,PGD,GGCT,RRM1,IDH2,PRDX6,GSTO1,TXNDC12,SRM,GPX2,G6PD,SMS,IDH1
HT29	cell&exo	61	hsa04071	Sphingolipid signaling pathway	23	116	0.47	0.00011	9606.ENSP00000215832,9606.ENSP00000249071,9606.ENSP00000256078,9606.ENSP00000262948,9606.ENSP00000269305,9606.ENSP00000286548,9606.ENSP00000293288,9606.ENSP00000302486,9606.ENSP00000312999,9606.ENSP00000317985,9606.ENSP00000324804,9606.ENSP00000325074,9606.ENSP00000343027,9606.ENSP00000344220,9606.ENSP00000358548,9606.ENSP00000358867,9606.ENSP00000382342,9606.ENSP00000384273,9606.ENSP00000400175,…	MAPK1,RAC2,KRAS,MAP2K2,TP53,GNAQ,BAX,MAP2K1,GNAI2,ROCK2,PPP2R1A,PPP2R2A,GNAI1,PDPK1,NRAS,GNAI3,ABCC1,RELA,RHOA,GNA13,PPP2R5D,PIK3R1,PLCB3
HT29	cell&exo	62	hsa01210	2-Oxocarboxylic acid metabolism	9	18	0.87	0.00014	9606.ENSP00000216254,9606.ENSP00000245206,9606.ENSP00000299518,9606.ENSP00000309477,9606.ENSP00000331897,9606.ENSP00000342056,9606.ENSP00000359539,9606.ENSP00000384296,9606.ENSP00000390265	ACO2,GOT2,IDH3A,ACO1,IDH2,CS,GOT1,ACY1,IDH1
HT29	cell&exo	63	hsa01521	EGFR tyrosine kinase inhibitor resistance	18	78	0.53	0.00015	9606.ENSP00000215832,9606.ENSP00000256078,9606.ENSP00000262948,9606.ENSP00000264657,9606.ENSP00000268035,9606.ENSP00000275493,9606.ENSP00000290277,9606.ENSP00000293288,9606.ENSP00000302486,9606.ENSP00000317272,9606.ENSP00000343204,9606.ENSP00000351015,9606.ENSP00000354558,9606.ENSP00000358548,9606.ENSP00000362680,9606.ENSP00000369757,9606.ENSP00000376345,9606.ENSP00000428056	MAPK1,KRAS,MAP2K2,STAT3,IGF1R,EGFR,ARAF,BAX,MAP2K1,MET,JAK1,NF1,MTOR,NRAS,SRC,RPS6,GRB2,PIK3R1
HT29	cell&exo	64	hsa00250	Alanine, aspartate and glutamate metabolism	12	36	0.69	0.00017	9606.ENSP00000175506,9606.ENSP00000245206,9606.ENSP00000264220,9606.ENSP00000264705,9606.ENSP00000307188,9606.ENSP00000349860,9606.ENSP00000355493,9606.ENSP00000359539,9606.ENSP00000361471,9606.ENSP00000364490,9606.ENSP00000377696,9606.ENSP00000485525	ASNS,GOT2,PPAT,CAD,ASL,GFPT1,ADSS,GOT1,ASS1,ALDH4A1,NIT2,ADSL
HT29	cell&exo	65	hsa04720	Long-term potentiation	16	64	0.57	0.00018	9606.ENSP00000215832,9606.ENSP00000250559,9606.ENSP00000256078,9606.ENSP00000262948,9606.ENSP00000272298,9606.ENSP00000286548,9606.ENSP00000290277,9606.ENSP00000302486,9606.ENSP00000326031,9606.ENSP00000341779,9606.ENSP00000358548,9606.ENSP00000368884,9606.ENSP00000378323,9606.ENSP00000378769,9606.ENSP00000435412,9606.ENSP00000443631	MAPK1,RAP1B,KRAS,MAP2K2,CALM2,GNAQ,ARAF,MAP2K1,PPP1CA,PPP1CC,NRAS,RPS6KA3,PPP3CA,PPP1CB,RPS6KA1,PLCB3
HT29	cell&exo	66	hsa05235	PD-L1 expression and PD-1 checkpoint pathway in cancer	19	88	0.5	0.0002	9606.ENSP00000215832,9606.ENSP00000217244,9606.ENSP00000256078,9606.ENSP00000262506,9606.ENSP00000262948,9606.ENSP00000264657,9606.ENSP00000275493,9606.ENSP00000302486,9606.ENSP00000320663,9606.ENSP00000340944,9606.ENSP00000343204,9606.ENSP00000345083,9606.ENSP00000354394,9606.ENSP00000354558,9606.ENSP00000358548,9606.ENSP00000365042,9606.ENSP00000378323,9606.ENSP00000384273,9606.ENSP00000428056	MAPK1,CSNK2A1,KRAS,CSNK2A2,MAP2K2,STAT3,EGFR,MAP2K1,EML4,PTPN11,JAK1,MAP2K3,STAT1,MTOR,NRAS,CSNK2B,PPP3CA,RELA,PIK3R1
HT29	cell&exo	67	hsa04921	Oxytocin signaling pathway	26	149	0.41	0.00021	9606.ENSP00000215832,9606.ENSP00000256078,9606.ENSP00000262948,9606.ENSP00000272298,9606.ENSP00000275493,9606.ENSP00000286548,9606.ENSP00000302486,9606.ENSP00000307940,9606.ENSP00000312999,9606.ENSP00000317985,9606.ENSP00000323867,9606.ENSP00000326031,9606.ENSP00000341779,9606.ENSP00000343027,9606.ENSP00000346148,9606.ENSP00000349960,9606.ENSP00000358548,9606.ENSP00000358867,9606.ENSP00000360141,…	MAPK1,KRAS,MAP2K2,CALM2,EGFR,GNAQ,MAP2K1,EEF2,GNAI2,ROCK2,PRKAG1,PPP1CA,PPP1CC,GNAI1,PRKAA1,ACTB,NRAS,GNAI3,GNAS,SRC,PPP3CA,PPP1CB,RHOA,PLCB3,MYL6,ACTG1
HT29	cell&exo	68	hsa04218	Cellular senescence	26	150	0.41	0.00023	9606.ENSP00000215832,9606.ENSP00000246792,9606.ENSP00000256078,9606.ENSP00000256196,9606.ENSP00000262187,9606.ENSP00000262948,9606.ENSP00000269305,9606.ENSP00000272298,9606.ENSP00000295006,9606.ENSP00000302486,9606.ENSP00000326031,9606.ENSP00000341779,9606.ENSP00000345083,9606.ENSP00000354558,9606.ENSP00000358548,9606.ENSP00000360671,9606.ENSP00000361635,9606.ENSP00000374455,9606.ENSP00000378323,…	MAPK1,RRAS,KRAS,RRAS2,RHEB,MAP2K2,TP53,CALM2,CAPN2,MAP2K1,PPP1CA,PPP1CC,MAP2K3,MTOR,NRAS,SLC25A5,VDAC2,SQSTM1,PPP3CA,CDK1,PPP1CB,HLA-A,RELA,PIK3R1,VDAC3,CAPN1
HT29	cell&exo	69	hsa04150	mTOR signaling pathway	26	151	0.41	0.00025	9606.ENSP00000215832,9606.ENSP00000234396,9606.ENSP00000256078,9606.ENSP00000258418,9606.ENSP00000261622,9606.ENSP00000262187,9606.ENSP00000262948,9606.ENSP00000268035,9606.ENSP00000273398,9606.ENSP00000276390,9606.ENSP00000296782,9606.ENSP00000302486,9606.ENSP00000344220,9606.ENSP00000346148,9606.ENSP00000352522,9606.ENSP00000354558,9606.ENSP00000358548,9606.ENSP00000367123,9606.ENSP00000368884,…	MAPK1,ATP6V1B1,KRAS,CAB39,SLC7A5,RHEB,MAP2K2,IGF1R,ATP6V1A,ATP6V1B2,RICTOR,MAP2K1,PDPK1,PRKAA1,ATP6V1H,MTOR,NRAS,SLC3A2,RPS6KA3,RPS6,GRB2,SEH1L,EIF4B,RHOA,PIK3R1,RPS6KA1
HT29	cell&exo	70	hsa00520	Amino sugar and nucleotide sugar metabolism	13	46	0.62	0.0003	9606.ENSP00000268261,9606.ENSP00000288078,9606.ENSP00000319501,9606.ENSP00000338703,9606.ENSP00000349860,9606.ENSP00000350949,9606.ENSP00000354468,9606.ENSP00000356903,9606.ENSP00000370194,9606.ENSP00000405573,9606.ENSP00000425809,9606.ENSP00000465930,9606.ENSP00000477639	PMM2,FUK,UGDH,UGP2,GFPT1,GMPPA,CYB5R3,UAP1,GMDS,GPI,PGM3,GALK1,NAGK
HT29	cell&exo	71	hsa04390	Hippo signaling pathway	26	153	0.4	0.0003	9606.ENSP00000248975,9606.ENSP00000261769,9606.ENSP00000264335,9606.ENSP00000295797,9606.ENSP00000304669,9606.ENSP00000306330,9606.ENSP00000324464,9606.ENSP00000324804,9606.ENSP00000325074,9606.ENSP00000326031,9606.ENSP00000341779,9606.ENSP00000344456,9606.ENSP00000344666,9606.ENSP00000345731,9606.ENSP00000349486,9606.ENSP00000349960,9606.ENSP00000360672,9606.ENSP00000361930,9606.ENSP00000363480,…	YWHAH,CDH1,YWHAE,PRKCI,CTNNA1,YWHAG,CSNK1D,PPP2R1A,PPP2R2A,PPP1CA,PPP1CC,CTNNB1,NF2,DLG1,SCRIB,ACTB,PARD6B,YWHAB,DLG3,YWHAQ,LLGL2,PPP1CB,YWHAZ,MOB1A,CTNNA2,ACTG1
HT29	cell&exo	72	hsa04961	Endocrine and other factor-regulated calcium reabsorption	14	53	0.59	0.0003	9606.ENSP00000261890,9606.ENSP00000286548,9606.ENSP00000292807,9606.ENSP00000327694,9606.ENSP00000351926,9606.ENSP00000356790,9606.ENSP00000360141,9606.ENSP00000362014,9606.ENSP00000373905,9606.ENSP00000392043,9606.ENSP00000443631,9606.ENSP00000445306,9606.ENSP00000479606,9606.ENSP00000482835	RAB11A,GNAQ,AP2M1,AP2A2,AP2A1,ATP1B1,GNAS,DNM1,DNM2,ATP2B1,PLCB3,ATP1A1,CLTC,AP2B1
HT29	cell&exo	73	hsa05034	Alcoholism	25	144	0.41	0.0003	9606.ENSP00000215832,9606.ENSP00000244537,9606.ENSP00000254810,9606.ENSP00000256078,9606.ENSP00000272298,9606.ENSP00000290277,9606.ENSP00000302486,9606.ENSP00000305260,9606.ENSP00000308405,9606.ENSP00000312999,9606.ENSP00000326031,9606.ENSP00000332194,9606.ENSP00000341779,9606.ENSP00000343027,9606.ENSP00000358548,9606.ENSP00000358867,9606.ENSP00000360021,9606.ENSP00000360141,9606.ENSP00000362649,…	MAPK1,HIST1H4F,H3F3B,KRAS,CALM2,ARAF,MAP2K1,GNB2,H2AFV,GNAI2,PPP1CA,HIST2H2AC,PPP1CC,GNAI1,NRAS,GNAI3,GNG12,GNAS,HDAC1,MAOB,GRB2,SLC29A1,PPP1CB,H2AFY,GNB1
HT29	cell&exo	74	hsa05223	Non-small cell lung cancer	16	68	0.54	0.0003	9606.ENSP00000215832,9606.ENSP00000256078,9606.ENSP00000262948,9606.ENSP00000264657,9606.ENSP00000269305,9606.ENSP00000275493,9606.ENSP00000290277,9606.ENSP00000293288,9606.ENSP00000302486,9606.ENSP00000317272,9606.ENSP00000320663,9606.ENSP00000344220,9606.ENSP00000358548,9606.ENSP00000361892,9606.ENSP00000376345,9606.ENSP00000428056	MAPK1,KRAS,MAP2K2,STAT3,TP53,EGFR,ARAF,BAX,MAP2K1,MET,EML4,PDPK1,NRAS,STK4,GRB2,PIK3R1
HT29	cell&exo	75	hsa05169	Epstein-Barr virus infection	30	193	0.36	0.00035	9606.ENSP00000157812,9606.ENSP00000261303,9606.ENSP00000261712,9606.ENSP00000264639,9606.ENSP00000264657,9606.ENSP00000269305,9606.ENSP00000293288,9606.ENSP00000300289,9606.ENSP00000309474,9606.ENSP00000310129,9606.ENSP00000310572,9606.ENSP00000320866,9606.ENSP00000343204,9606.ENSP00000343535,9606.ENSP00000345083,9606.ENSP00000348442,9606.ENSP00000351273,9606.ENSP00000354394,9606.ENSP00000362649,…	PSMC4,PSMC1,PSMD11,PSMD3,STAT3,TP53,BAX,PDIA3,PSMD1,PSMD2,PSMC5,CALR,JAK1,USP7,MAP2K3,PSMD12,CASP8,STAT1,HDAC1,SYK,ISG15,HLA-A,RELA,PSMD14,PSMC2,CD44,PSMC6,PIK3R1,ADRM1,PSMC3
HT29	cell&exo	76	hsa04114	Oocyte meiosis	22	120	0.43	0.00038	9606.ENSP00000215832,9606.ENSP00000248975,9606.ENSP00000264335,9606.ENSP00000268035,9606.ENSP00000272298,9606.ENSP00000302486,9606.ENSP00000306330,9606.ENSP00000323421,9606.ENSP00000324804,9606.ENSP00000326031,9606.ENSP00000326804,9606.ENSP00000341779,9606.ENSP00000358770,9606.ENSP00000361930,9606.ENSP00000368884,9606.ENSP00000371267,9606.ENSP00000378323,9606.ENSP00000378699,9606.ENSP00000378769,…	MAPK1,YWHAH,YWHAE,IGF1R,CALM2,MAP2K1,YWHAG,SMC1A,PPP2R1A,PPP1CA,CUL1,PPP1CC,SLK,YWHAB,RPS6KA3,YWHAQ,PPP3CA,CDK1,PPP1CB,YWHAZ,PPP2R5D,RPS6KA1
HT29	cell&exo	77	hsa04216	Ferroptosis	12	41	0.64	0.00041	9606.ENSP00000216951,9606.ENSP00000229416,9606.ENSP00000269305,9606.ENSP00000273550,9606.ENSP00000305556,9606.ENSP00000339787,9606.ENSP00000348429,9606.ENSP00000350012,9606.ENSP00000353224,9606.ENSP00000361635,9606.ENSP00000367123,9606.ENSP00000428845	GSS,GCLC,TP53,FTH1,PCBP1,ACSL4,ACSL5,ACSL3,TFRC,VDAC2,SLC3A2,VDAC3
HT29	cell&exo	78	hsa05110	Vibrio cholerae infection	13	48	0.6	0.00041	9606.ENSP00000234396,9606.ENSP00000243253,9606.ENSP00000262461,9606.ENSP00000264649,9606.ENSP00000273398,9606.ENSP00000276390,9606.ENSP00000281537,9606.ENSP00000286091,9606.ENSP00000349960,9606.ENSP00000352522,9606.ENSP00000360141,9606.ENSP00000438262,9606.ENSP00000458162	ATP6V1B1,SEC61A1,SLC12A2,ATP6V0A1,ATP6V1A,ATP6V1B2,TJP1,PDIA4,ACTB,ATP6V1H,GNAS,TJP2,ACTG1
HT29	cell&exo	79	hsa04014	Ras signaling pathway	33	226	0.33	0.00044	9606.ENSP00000215832,9606.ENSP00000246792,9606.ENSP00000249071,9606.ENSP00000250559,9606.ENSP00000256078,9606.ENSP00000256196,9606.ENSP00000262948,9606.ENSP00000268035,9606.ENSP00000272298,9606.ENSP00000273047,9606.ENSP00000274376,9606.ENSP00000275493,9606.ENSP00000298316,9606.ENSP00000302486,9606.ENSP00000305260,9606.ENSP00000314067,9606.ENSP00000317272,9606.ENSP00000335029,9606.ENSP00000340944,…	MAPK1,RRAS,RAC2,RAP1B,KRAS,RRAS2,MAP2K2,IGF1R,CALM2,RAB5A,RASA1,EGFR,ARF6,MAP2K1,GNB2,PAK2,MET,RASA3,PTPN11,NF1,EPHA2,RAB5B,NRAS,GNG12,STK4,GRB2,CDC42,RELA,RHOA,PIK3R1,RAB5C,PAK4,GNB1
HT29	cell&exo	80	hsa04210	Apoptosis	23	132	0.41	0.00049	9606.ENSP00000215832,9606.ENSP00000248437,9606.ENSP00000256078,9606.ENSP00000256383,9606.ENSP00000261366,9606.ENSP00000262948,9606.ENSP00000269305,9606.ENSP00000287295,9606.ENSP00000293288,9606.ENSP00000295006,9606.ENSP00000302486,9606.ENSP00000344220,9606.ENSP00000349960,9606.ENSP00000351273,9606.ENSP00000355759,9606.ENSP00000357283,9606.ENSP00000358548,9606.ENSP00000361824,9606.ENSP00000371419,…	MAPK1,TUBA4A,KRAS,EIF2S1,LMNB1,MAP2K2,TP53,AIFM1,BAX,CAPN2,MAP2K1,PDPK1,ACTB,CASP8,PARP1,LMNA,NRAS,SPTAN1,PARP4,RELA,PIK3R1,CAPN1,ACTG1
HT29	cell&exo	81	hsa04722	Neurotrophin signaling pathway	21	114	0.44	0.00049	9606.ENSP00000215832,9606.ENSP00000228945,9606.ENSP00000250559,9606.ENSP00000256078,9606.ENSP00000262948,9606.ENSP00000264335,9606.ENSP00000269305,9606.ENSP00000269321,9606.ENSP00000272298,9606.ENSP00000293288,9606.ENSP00000302486,9606.ENSP00000340944,9606.ENSP00000344220,9606.ENSP00000358548,9606.ENSP00000368884,9606.ENSP00000376345,9606.ENSP00000383118,9606.ENSP00000384273,9606.ENSP00000400175,…	MAPK1,ARHGDIB,RAP1B,KRAS,MAP2K2,YWHAE,TP53,ARHGDIA,CALM2,BAX,MAP2K1,PTPN11,PDPK1,NRAS,RPS6KA3,GRB2,CDC42,RELA,RHOA,PIK3R1,RPS6KA1
HT29	cell&exo	82	hsa05206	MicroRNAs in cancer	26	160	0.38	0.00049	9606.ENSP00000215832,9606.ENSP00000256078,9606.ENSP00000260363,9606.ENSP00000262948,9606.ENSP00000264657,9606.ENSP00000269305,9606.ENSP00000275493,9606.ENSP00000278742,9606.ENSP00000302486,9606.ENSP00000317272,9606.ENSP00000351022,9606.ENSP00000354558,9606.ENSP00000356042,9606.ENSP00000358548,9606.ENSP00000362649,9606.ENSP00000365439,9606.ENSP00000370128,9606.ENSP00000376345,9606.ENSP00000382342,…	MAPK1,KRAS,KIF23,MAP2K2,STAT3,TP53,EGFR,ST14,MAP2K1,MET,TPM1,MTOR,EZR,NRAS,HDAC1,HNRNPK,SLC7A1,GRB2,ABCC1,RDX,CD44,RHOA,STMN1,PIK3R1,PAK4,MARCKS
HT29	cell&exo	83	hsa04915	Estrogen signaling pathway	23	133	0.41	0.00053	9606.ENSP00000001008,9606.ENSP00000215832,9606.ENSP00000256078,9606.ENSP00000262948,9606.ENSP00000272298,9606.ENSP00000275493,9606.ENSP00000286548,9606.ENSP00000299767,9606.ENSP00000302486,9606.ENSP00000312999,9606.ENSP00000335153,9606.ENSP00000343027,9606.ENSP00000358548,9606.ENSP00000358867,9606.ENSP00000360141,9606.ENSP00000360609,9606.ENSP00000362680,9606.ENSP00000364801,9606.ENSP00000373487,…	FKBP4,MAPK1,KRAS,MAP2K2,CALM2,EGFR,GNAQ,HSP90B1,MAP2K1,GNAI2,HSP90AA1,GNAI1,NRAS,GNAI3,GNAS,HSP90AB1,SRC,HSPA1B,KRT18,GRB2,PIK3R1,HSPA8,PLCB3
HT29	cell&exo	84	hsa04022	cGMP-PKG signaling pathway	26	162	0.38	0.00057	9606.ENSP00000078429,9606.ENSP00000215832,9606.ENSP00000245932,9606.ENSP00000262948,9606.ENSP00000272298,9606.ENSP00000286548,9606.ENSP00000302486,9606.ENSP00000312999,9606.ENSP00000317985,9606.ENSP00000326031,9606.ENSP00000341779,9606.ENSP00000343027,9606.ENSP00000356790,9606.ENSP00000358867,9606.ENSP00000360671,9606.ENSP00000361635,9606.ENSP00000378323,9606.ENSP00000378769,9606.ENSP00000392043,…	GNA11,MAPK1,VASP,MAP2K2,CALM2,GNAQ,MAP2K1,GNAI2,ROCK2,PPP1CA,PPP1CC,GNAI1,ATP1B1,GNAI3,SLC25A5,VDAC2,PPP3CA,PPP1CB,ATP2B1,RHOA,GNA13,VDAC3,ATP2A2,PLCB3,ATP1A1,GTF2I
HT29	cell&exo	85	hsa04666	Fc gamma R-mediated phagocytosis	18	90	0.47	0.00057	9606.ENSP00000215832,9606.ENSP00000228825,9606.ENSP00000245932,9606.ENSP00000249071,9606.ENSP00000262942,9606.ENSP00000295685,9606.ENSP00000298316,9606.ENSP00000302486,9606.ENSP00000345361,9606.ENSP00000364907,9606.ENSP00000373905,9606.ENSP00000383118,9606.ENSP00000388169,9606.ENSP00000389631,9606.ENSP00000428056,9606.ENSP00000432660,9606.ENSP00000478061,9606.ENSP00000483313	MAPK1,ARPC3,VASP,RAC2,ARPC1A,ARPC2,ARF6,MAP2K1,ARPC5L,SYK,DNM2,CDC42,ARPC4,ARPC1B,PIK3R1,CFL1,MARCKS,WASF2
HT29	cell&exo	86	hsa00630	Glyoxylate and dicarboxylate metabolism	10	30	0.69	0.00058	9606.ENSP00000205402,9606.ENSP00000216254,9606.ENSP00000265838,9606.ENSP00000309477,9606.ENSP00000316924,9606.ENSP00000327070,9606.ENSP00000333667,9606.ENSP00000342056,9606.ENSP00000356015,9606.ENSP00000438144	DLD,ACO2,ACAT1,ACO1,ACSS1,MDH2,SHMT2,CS,ACAT2,MDH1
HT29	cell&exo	87	hsa05146	Amoebiasis	19	100	0.45	0.00066	9606.ENSP00000078429,9606.ENSP00000211998,9606.ENSP00000222399,9606.ENSP00000248553,9606.ENSP00000252699,9606.ENSP00000252999,9606.ENSP00000258341,9606.ENSP00000265062,9606.ENSP00000273047,9606.ENSP00000286548,9606.ENSP00000341189,9606.ENSP00000353444,9606.ENSP00000360141,9606.ENSP00000377941,9606.ENSP00000384273,9606.ENSP00000428056,9606.ENSP00000443631,9606.ENSP00000447053,9606.ENSP00000484343	GNA11,VCL,LAMB1,HSPB1,ACTN4,LAMA5,LAMC1,RAB7A,RAB5A,GNAQ,PTK2,RAB5B,GNAS,ACTN1,RELA,PIK3R1,PLCB3,RAB5C,SERPINB6
HT29	cell&exo	88	hsa05120	Epithelial cell signaling in Helicobacter pylori infection	15	67	0.52	0.00067	9606.ENSP00000220003,9606.ENSP00000234396,9606.ENSP00000260408,9606.ENSP00000264649,9606.ENSP00000273398,9606.ENSP00000275493,9606.ENSP00000276390,9606.ENSP00000281537,9606.ENSP00000317272,9606.ENSP00000340944,9606.ENSP00000352522,9606.ENSP00000357005,9606.ENSP00000362680,9606.ENSP00000383118,9606.ENSP00000384273	CSK,ATP6V1B1,ADAM10,ATP6V0A1,ATP6V1A,EGFR,ATP6V1B2,TJP1,MET,PTPN11,ATP6V1H,F11R,SRC,CDC42,RELA
HT29	cell&exo	89	hsa04922	Glucagon signaling pathway	19	101	0.44	0.00072	9606.ENSP00000216392,9606.ENSP00000216962,9606.ENSP00000269848,9606.ENSP00000272298,9606.ENSP00000286548,9606.ENSP00000320171,9606.ENSP00000323867,9606.ENSP00000345771,9606.ENSP00000346148,9606.ENSP00000359991,9606.ENSP00000360141,9606.ENSP00000370517,9606.ENSP00000378323,9606.ENSP00000379386,9606.ENSP00000406162,9606.ENSP00000416293,9606.ENSP00000443631,9606.ENSP00000445175,9606.ENSP00000483300	PYGL,PYGB,PFKL,CALM2,GNAQ,PKM,PRKAG1,PFKM,PRKAA1,PGAM1,GNAS,PFKP,PPP3CA,LDHB,PRMT1,SLC2A1,PLCB3,LDHA,ACACA
HT29	cell&exo	90	hsa04110	Cell cycle	21	120	0.41	0.00081	9606.ENSP00000216122,9606.ENSP00000248975,9606.ENSP00000262105,9606.ENSP00000264156,9606.ENSP00000264335,9606.ENSP00000265056,9606.ENSP00000269305,9606.ENSP00000306330,9606.ENSP00000307288,9606.ENSP00000313420,9606.ENSP00000323421,9606.ENSP00000326804,9606.ENSP00000340989,9606.ENSP00000357858,9606.ENSP00000361930,9606.ENSP00000362649,9606.ENSP00000368458,9606.ENSP00000371267,9606.ENSP00000378699,…	MCM5,YWHAH,MCM4,MCM6,YWHAE,MCM2,TP53,YWHAG,MCM7,PRKDC,SMC1A,CUL1,SFN,BUB3,YWHAB,HDAC1,PCNA,YWHAQ,CDK1,YWHAZ,MCM3
HT29	cell&exo	91	hsa04152	AMPK signaling pathway	21	120	0.41	0.00081	9606.ENSP00000258418,9606.ENSP00000262187,9606.ENSP00000262646,9606.ENSP00000264710,9606.ENSP00000268035,9606.ENSP00000269848,9606.ENSP00000300935,9606.ENSP00000304592,9606.ENSP00000307940,9606.ENSP00000323867,9606.ENSP00000324804,9606.ENSP00000325074,9606.ENSP00000344220,9606.ENSP00000345771,9606.ENSP00000346148,9606.ENSP00000354558,9606.ENSP00000362946,9606.ENSP00000370517,9606.ENSP00000417963,…	CAB39,RHEB,RAB2A,RAB10,IGF1R,PFKL,RAB8A,FASN,EEF2,PRKAG1,PPP2R1A,PPP2R2A,PDPK1,PFKM,PRKAA1,MTOR,RAB14,PFKP,PPP2R5D,PIK3R1,ACACA
HT29	cell&exo	92	hsa05161	Hepatitis B	25	159	0.37	0.00093	9606.ENSP00000215832,9606.ENSP00000256078,9606.ENSP00000262948,9606.ENSP00000264657,9606.ENSP00000269305,9606.ENSP00000290277,9606.ENSP00000293288,9606.ENSP00000301764,9606.ENSP00000302486,9606.ENSP00000343204,9606.ENSP00000345083,9606.ENSP00000351273,9606.ENSP00000354394,9606.ENSP00000358548,9606.ENSP00000361930,9606.ENSP00000362680,9606.ENSP00000363827,9606.ENSP00000368458,9606.ENSP00000371267,…	MAPK1,KRAS,MAP2K2,STAT3,TP53,ARAF,BAX,DDB1,MAP2K1,JAK1,MAP2K3,CASP8,STAT1,NRAS,YWHAB,SRC,HSPG2,PCNA,YWHAQ,GRB2,YWHAZ,DDX3X,RELA,PIK3R1,VDAC3
HT29	cell&exo	93	hsa04371	Apelin signaling pathway	22	131	0.4	0.00094	9606.ENSP00000215832,9606.ENSP00000246792,9606.ENSP00000256078,9606.ENSP00000256196,9606.ENSP00000261769,9606.ENSP00000262948,9606.ENSP00000272298,9606.ENSP00000286548,9606.ENSP00000302486,9606.ENSP00000305260,9606.ENSP00000312999,9606.ENSP00000323867,9606.ENSP00000343027,9606.ENSP00000346148,9606.ENSP00000354558,9606.ENSP00000358548,9606.ENSP00000358867,9606.ENSP00000360021,9606.ENSP00000369757,…	MAPK1,RRAS,KRAS,RRAS2,CDH1,MAP2K2,CALM2,GNAQ,MAP2K1,GNB2,GNAI2,PRKAG1,GNAI1,PRKAA1,MTOR,NRAS,GNAI3,GNG12,RPS6,GNA13,PLCB3,GNB1
HT29	cell&exo	94	hsa05215	Prostate cancer	18	96	0.44	0.001	9606.ENSP00000215832,9606.ENSP00000256078,9606.ENSP00000262948,9606.ENSP00000268035,9606.ENSP00000269305,9606.ENSP00000275493,9606.ENSP00000290277,9606.ENSP00000299767,9606.ENSP00000302486,9606.ENSP00000335153,9606.ENSP00000344220,9606.ENSP00000344456,9606.ENSP00000354558,9606.ENSP00000358548,9606.ENSP00000360609,9606.ENSP00000376345,9606.ENSP00000384273,9606.ENSP00000428056	MAPK1,KRAS,MAP2K2,IGF1R,TP53,EGFR,ARAF,HSP90B1,MAP2K1,HSP90AA1,PDPK1,CTNNB1,MTOR,NRAS,HSP90AB1,GRB2,RELA,PIK3R1
HT29	cell&exo	95	hsa04137	Mitophagy - animal	14	63	0.52	0.0011	9606.ENSP00000217244,9606.ENSP00000246792,9606.ENSP00000256078,9606.ENSP00000256196,9606.ENSP00000262506,9606.ENSP00000265062,9606.ENSP00000269305,9606.ENSP00000358548,9606.ENSP00000362680,9606.ENSP00000365042,9606.ENSP00000374455,9606.ENSP00000379721,9606.ENSP00000384273,9606.ENSP00000438465	CSNK2A1,RRAS,KRAS,RRAS2,CSNK2A2,RAB7A,TP53,NRAS,SRC,CSNK2B,SQSTM1,USP8,RELA,PGAM5
HT29	cell&exo	96	hsa00380	Tryptophan metabolism	11	41	0.6	0.0012	9606.ENSP00000205402,9606.ENSP00000261733,9606.ENSP00000265838,9606.ENSP00000335304,9606.ENSP00000345774,9606.ENSP00000346827,9606.ENSP00000356015,9606.ENSP00000357535,9606.ENSP00000367309,9606.ENSP00000370023,9606.ENSP00000387123	DLD,ALDH2,ACAT1,DLST,ALDH3A2,ALDH9A1,ACAT2,ECHS1,MAOB,HADHA,ALDH7A1
HT29	cell&exo	97	hsa00640	Propanoate metabolism	10	34	0.64	0.0012	9606.ENSP00000205402,9606.ENSP00000265838,9606.ENSP00000316924,9606.ENSP00000356015,9606.ENSP00000357535,9606.ENSP00000370023,9606.ENSP00000377446,9606.ENSP00000379386,9606.ENSP00000445175,9606.ENSP00000483300	DLD,ACAT1,ACSS1,ACAT2,ECHS1,HADHA,SUCLG1,LDHB,LDHA,ACACA
HT29	cell&exo	98	hsa05410	Hypertrophic cardiomyopathy	17	89	0.45	0.0012	9606.ENSP00000007722,9606.ENSP00000200181,9606.ENSP00000261023,9606.ENSP00000283249,9606.ENSP00000296181,9606.ENSP00000296585,9606.ENSP00000323867,9606.ENSP00000345230,9606.ENSP00000346148,9606.ENSP00000349960,9606.ENSP00000351022,9606.ENSP00000357283,9606.ENSP00000357516,9606.ENSP00000379350,9606.ENSP00000386896,9606.ENSP00000440045,9606.ENSP00000458162	ITGA3,ITGB4,ITGAV,ITGB6,ITGB5,ITGA2,PRKAG1,TPM4,PRKAA1,ACTB,TPM1,LMNA,TPM3,ITGB1,ITGA6,ATP2A2,ACTG1
HT29	cell&exo	99	hsa05212	Pancreatic cancer	15	73	0.48	0.0013	9606.ENSP00000215832,9606.ENSP00000249071,9606.ENSP00000256078,9606.ENSP00000264657,9606.ENSP00000269305,9606.ENSP00000275493,9606.ENSP00000290277,9606.ENSP00000293288,9606.ENSP00000302486,9606.ENSP00000343204,9606.ENSP00000354394,9606.ENSP00000354558,9606.ENSP00000383118,9606.ENSP00000384273,9606.ENSP00000428056	MAPK1,RAC2,KRAS,STAT3,TP53,EGFR,ARAF,BAX,MAP2K1,JAK1,STAT1,MTOR,CDC42,RELA,PIK3R1
HT29	cell&exo	100	hsa04721	Synaptic vesicle cycle	15	74	0.48	0.0015	9606.ENSP00000234396,9606.ENSP00000263354,9606.ENSP00000264649,9606.ENSP00000273398,9606.ENSP00000276390,9606.ENSP00000292807,9606.ENSP00000327694,9606.ENSP00000351926,9606.ENSP00000352522,9606.ENSP00000362014,9606.ENSP00000362399,9606.ENSP00000373905,9606.ENSP00000381293,9606.ENSP00000479606,9606.ENSP00000482835	ATP6V1B1,NAPA,ATP6V0A1,ATP6V1A,ATP6V1B2,AP2M1,AP2A2,AP2A1,ATP6V1H,DNM1,STXBP1,DNM2,NSF,CLTC,AP2B1
HT29	cell&exo	101	hsa03018	RNA degradation	15	75	0.47	0.0017	9606.ENSP00000234590,9606.ENSP00000263579,9606.ENSP00000269848,9606.ENSP00000297185,9606.ENSP00000313007,9606.ENSP00000320949,9606.ENSP00000324105,9606.ENSP00000345771,9606.ENSP00000351811,9606.ENSP00000364543,9606.ENSP00000366997,9606.ENSP00000370517,9606.ENSP00000373620,9606.ENSP00000400646,9606.ENSP00000478754	ENO1,DCPS,PFKL,HSPA9,PABPC1,CNOT1,ENO3,PFKM,EDC4,SKIV2L,DIS3,PFKP,HSPD1,PNPT1,DDX6
HT29	cell&exo	102	hsa05216	Thyroid cancer	10	36	0.61	0.0017	9606.ENSP00000215832,9606.ENSP00000256078,9606.ENSP00000261769,9606.ENSP00000262948,9606.ENSP00000269305,9606.ENSP00000293288,9606.ENSP00000302486,9606.ENSP00000344456,9606.ENSP00000357516,9606.ENSP00000358548	MAPK1,KRAS,CDH1,MAP2K2,TP53,BAX,MAP2K1,CTNNB1,TPM3,NRAS
HT29	cell&exo	103	hsa03008	Ribosome biogenesis in eukaryotes	15	77	0.46	0.0021	9606.ENSP00000217244,9606.ENSP00000221801,9606.ENSP00000246868,9606.ENSP00000257829,9606.ENSP00000262506,9606.ENSP00000268802,9606.ENSP00000354040,9606.ENSP00000355541,9606.ENSP00000358400,9606.ENSP00000363574,9606.ENSP00000365042,9606.ENSP00000370589,9606.ENSP00000384863,9606.ENSP00000395772,9606.ENSP00000446215	CSNK2A1,FBL,SBDS,NAT10,CSNK2A2,NOB1,GTPBP4,HEATR1,MDN1,EIF6,CSNK2B,NOP56,XPO1,GNL3,RAN
HT29	cell&exo	104	hsa01522	Endocrine resistance	17	95	0.42	0.0022	9606.ENSP00000215832,9606.ENSP00000256078,9606.ENSP00000262948,9606.ENSP00000268035,9606.ENSP00000269305,9606.ENSP00000275493,9606.ENSP00000290277,9606.ENSP00000293288,9606.ENSP00000302486,9606.ENSP00000325690,9606.ENSP00000341189,9606.ENSP00000354558,9606.ENSP00000358548,9606.ENSP00000360141,9606.ENSP00000362680,9606.ENSP00000376345,9606.ENSP00000428056	MAPK1,KRAS,MAP2K2,IGF1R,TP53,EGFR,ARAF,BAX,MAP2K1,CARM1,PTK2,MTOR,NRAS,GNAS,SRC,GRB2,PIK3R1
HT29	cell&exo	105	hsa05145	Toxoplasmosis	18	105	0.4	0.0024	9606.ENSP00000215832,9606.ENSP00000222399,9606.ENSP00000252999,9606.ENSP00000258341,9606.ENSP00000264657,9606.ENSP00000312999,9606.ENSP00000343027,9606.ENSP00000343204,9606.ENSP00000344220,9606.ENSP00000345083,9606.ENSP00000351273,9606.ENSP00000354394,9606.ENSP00000358867,9606.ENSP00000364801,9606.ENSP00000379350,9606.ENSP00000384273,9606.ENSP00000386896,9606.ENSP00000432083	MAPK1,LAMB1,LAMA5,LAMC1,STAT3,GNAI2,GNAI1,JAK1,PDPK1,MAP2K3,CASP8,STAT1,GNAI3,HSPA1B,ITGB1,RELA,ITGA6,HSPA8
HT29	cell&exo	106	hsa04931	Insulin resistance	18	107	0.4	0.0028	9606.ENSP00000216392,9606.ENSP00000216962,9606.ENSP00000264657,9606.ENSP00000323867,9606.ENSP00000326031,9606.ENSP00000340944,9606.ENSP00000341779,9606.ENSP00000344220,9606.ENSP00000346148,9606.ENSP00000349860,9606.ENSP00000353030,9606.ENSP00000354558,9606.ENSP00000368884,9606.ENSP00000378769,9606.ENSP00000384273,9606.ENSP00000416293,9606.ENSP00000428056,9606.ENSP00000435412	PYGL,PYGB,STAT3,PRKAG1,PPP1CA,PTPN11,PPP1CC,PDPK1,PRKAA1,GFPT1,PTPRF,MTOR,RPS6KA3,PPP1CB,RELA,SLC2A1,PIK3R1,RPS6KA1
HT29	cell&exo	107	hsa05214	Glioma	14	72	0.46	0.003	9606.ENSP00000215832,9606.ENSP00000256078,9606.ENSP00000262948,9606.ENSP00000268035,9606.ENSP00000269305,9606.ENSP00000272298,9606.ENSP00000275493,9606.ENSP00000290277,9606.ENSP00000293288,9606.ENSP00000302486,9606.ENSP00000354558,9606.ENSP00000358548,9606.ENSP00000376345,9606.ENSP00000428056	MAPK1,KRAS,MAP2K2,IGF1R,TP53,CALM2,EGFR,ARAF,BAX,MAP2K1,MTOR,NRAS,GRB2,PIK3R1
HT29	cell&exo	108	hsa04935	Growth hormone synthesis, secretion and action	19	118	0.38	0.0032	9606.ENSP00000078429,9606.ENSP00000215832,9606.ENSP00000256078,9606.ENSP00000262948,9606.ENSP00000264657,9606.ENSP00000286548,9606.ENSP00000302486,9606.ENSP00000312999,9606.ENSP00000341189,9606.ENSP00000343027,9606.ENSP00000345083,9606.ENSP00000354394,9606.ENSP00000354558,9606.ENSP00000358548,9606.ENSP00000358867,9606.ENSP00000360141,9606.ENSP00000376345,9606.ENSP00000428056,9606.ENSP00000443631	GNA11,MAPK1,KRAS,MAP2K2,STAT3,GNAQ,MAP2K1,GNAI2,PTK2,GNAI1,MAP2K3,STAT1,MTOR,NRAS,GNAI3,GNAS,GRB2,PIK3R1,PLCB3
HT29	cell&exo	109	hsa05210	Colorectal cancer	15	82	0.43	0.0034	9606.ENSP00000215832,9606.ENSP00000249071,9606.ENSP00000256078,9606.ENSP00000262948,9606.ENSP00000269305,9606.ENSP00000275493,9606.ENSP00000290277,9606.ENSP00000293288,9606.ENSP00000302486,9606.ENSP00000344456,9606.ENSP00000354558,9606.ENSP00000358548,9606.ENSP00000376345,9606.ENSP00000400175,9606.ENSP00000428056	MAPK1,RAC2,KRAS,MAP2K2,TP53,EGFR,ARAF,BAX,MAP2K1,CTNNB1,MTOR,NRAS,GRB2,RHOA,PIK3R1
HT29	cell&exo	110	hsa05219	Bladder cancer	10	41	0.56	0.0036	9606.ENSP00000215832,9606.ENSP00000256078,9606.ENSP00000261769,9606.ENSP00000262948,9606.ENSP00000269305,9606.ENSP00000275493,9606.ENSP00000290277,9606.ENSP00000302486,9606.ENSP00000358548,9606.ENSP00000362680	MAPK1,KRAS,CDH1,MAP2K2,TP53,EGFR,ARAF,MAP2K1,NRAS,SRC
HT29	cell&exo	111	hsa04370	VEGF signaling pathway	12	57	0.49	0.0037	9606.ENSP00000215832,9606.ENSP00000248553,9606.ENSP00000249071,9606.ENSP00000256078,9606.ENSP00000262948,9606.ENSP00000302486,9606.ENSP00000341189,9606.ENSP00000358548,9606.ENSP00000362680,9606.ENSP00000378323,9606.ENSP00000383118,9606.ENSP00000428056	MAPK1,HSPB1,RAC2,KRAS,MAP2K2,MAP2K1,PTK2,NRAS,SRC,PPP3CA,CDC42,PIK3R1
HT29	cell&exo	112	hsa05418	Fluid shear stress and atherosclerosis	20	130	0.36	0.0038	9606.ENSP00000249071,9606.ENSP00000261023,9606.ENSP00000269305,9606.ENSP00000272298,9606.ENSP00000299767,9606.ENSP00000335153,9606.ENSP00000341189,9606.ENSP00000344456,9606.ENSP00000346148,9606.ENSP00000349960,9606.ENSP00000354837,9606.ENSP00000358727,9606.ENSP00000360609,9606.ENSP00000361471,9606.ENSP00000362680,9606.ENSP00000374455,9606.ENSP00000384273,9606.ENSP00000400175,9606.ENSP00000428056,…	RAC2,ITGAV,TP53,CALM2,HSP90B1,HSP90AA1,PTK2,CTNNB1,PRKAA1,ACTB,ARHGEF2,GSTO1,HSP90AB1,ASS1,SRC,SQSTM1,RELA,RHOA,PIK3R1,ACTG1
HT29	cell&exo	113	hsa05220	Chronic myeloid leukemia	14	75	0.44	0.0041	9606.ENSP00000215832,9606.ENSP00000256078,9606.ENSP00000262948,9606.ENSP00000269305,9606.ENSP00000290277,9606.ENSP00000290921,9606.ENSP00000293288,9606.ENSP00000302486,9606.ENSP00000340944,9606.ENSP00000358548,9606.ENSP00000362649,9606.ENSP00000376345,9606.ENSP00000384273,9606.ENSP00000428056	MAPK1,KRAS,MAP2K2,TP53,ARAF,CTBP1,BAX,MAP2K1,PTPN11,NRAS,HDAC1,GRB2,RELA,PIK3R1
HT29	cell&exo	114	hsa04270	Vascular smooth muscle contraction	20	133	0.35	0.0048	9606.ENSP00000078429,9606.ENSP00000215832,9606.ENSP00000216181,9606.ENSP00000262948,9606.ENSP00000272298,9606.ENSP00000286548,9606.ENSP00000290277,9606.ENSP00000302486,9606.ENSP00000317985,9606.ENSP00000326031,9606.ENSP00000337261,9606.ENSP00000341779,9606.ENSP00000353590,9606.ENSP00000360141,9606.ENSP00000378769,9606.ENSP00000400175,9606.ENSP00000400717,9606.ENSP00000443631,9606.ENSP00000446955,…	GNA11,MAPK1,MYH9,MAP2K2,CALM2,GNAQ,ARAF,MAP2K1,ROCK2,PPP1CA,ARHGEF1,PPP1CC,MYH10,GNAS,PPP1CB,RHOA,GNA13,PLCB3,MYL6,MYH14
HT29	cell&exo	115	hsa05414	Dilated cardiomyopathy	16	95	0.4	0.0049	9606.ENSP00000007722,9606.ENSP00000200181,9606.ENSP00000261023,9606.ENSP00000283249,9606.ENSP00000296181,9606.ENSP00000296585,9606.ENSP00000345230,9606.ENSP00000349960,9606.ENSP00000351022,9606.ENSP00000357283,9606.ENSP00000357516,9606.ENSP00000360141,9606.ENSP00000379350,9606.ENSP00000386896,9606.ENSP00000440045,9606.ENSP00000458162	ITGA3,ITGB4,ITGAV,ITGB6,ITGB5,ITGA2,TPM4,ACTB,TPM1,LMNA,TPM3,GNAS,ITGB1,ITGA6,ATP2A2,ACTG1
HT29	cell&exo	116	hsa00310	Lysine degradation	12	60	0.47	0.0051	9606.ENSP00000205402,9606.ENSP00000223127,9606.ENSP00000252599,9606.ENSP00000261733,9606.ENSP00000265838,9606.ENSP00000335304,9606.ENSP00000345774,9606.ENSP00000346827,9606.ENSP00000356015,9606.ENSP00000357535,9606.ENSP00000370023,9606.ENSP00000387123	DLD,PLOD3,COLGALT1,ALDH2,ACAT1,DLST,ALDH3A2,ALDH9A1,ACAT2,ECHS1,HADHA,ALDH7A1
HT29	cell&exo	117	hsa04962	Vasopressin-regulated water reabsorption	10	44	0.53	0.0053	9606.ENSP00000228945,9606.ENSP00000261890,9606.ENSP00000269321,9606.ENSP00000273047,9606.ENSP00000273130,9606.ENSP00000348965,9606.ENSP00000353444,9606.ENSP00000360141,9606.ENSP00000381293,9606.ENSP00000447053	ARHGDIB,RAB11A,ARHGDIA,RAB5A,DYNC1LI1,DYNC1H1,RAB5B,GNAS,NSF,RAB5C
HT29	cell&exo	118	hsa04062	Chemokine signaling pathway	25	186	0.3	0.0054	9606.ENSP00000215832,9606.ENSP00000249071,9606.ENSP00000250559,9606.ENSP00000256078,9606.ENSP00000264657,9606.ENSP00000286548,9606.ENSP00000302486,9606.ENSP00000305260,9606.ENSP00000312262,9606.ENSP00000312999,9606.ENSP00000317985,9606.ENSP00000341189,9606.ENSP00000343027,9606.ENSP00000354394,9606.ENSP00000358548,9606.ENSP00000358867,9606.ENSP00000360021,9606.ENSP00000362680,9606.ENSP00000376345,…	MAPK1,RAC2,RAP1B,KRAS,STAT3,GNAQ,MAP2K1,GNB2,ADRBK1,GNAI2,ROCK2,PTK2,GNAI1,STAT1,NRAS,GNAI3,GNG12,SRC,GRB2,CDC42,RELA,RHOA,PIK3R1,PLCB3,GNB1
HT29	cell&exo	119	hsa04714	Thermogenesis	29	229	0.27	0.0055	9606.ENSP00000256078,9606.ENSP00000262030,9606.ENSP00000262187,9606.ENSP00000263774,9606.ENSP00000264932,9606.ENSP00000268379,9606.ENSP00000290299,9606.ENSP00000300688,9606.ENSP00000323867,9606.ENSP00000339787,9606.ENSP00000345083,9606.ENSP00000346148,9606.ENSP00000348429,9606.ENSP00000349142,9606.ENSP00000349960,9606.ENSP00000350012,9606.ENSP00000354558,9606.ENSP00000354876,9606.ENSP00000358548,…	KRAS,ATP5B,RHEB,NDUFS3,SDHA,UQCRC2,ATP5O,ATP5L,PRKAG1,ACSL4,MAP2K3,PRKAA1,ACSL5,ATP5C1,ACTB,ACSL3,MTOR,MT-CO2,NRAS,ATP5F1,GNAS,RPS6KA3,RPS6,GRB2,ATP5A1,NDUFS1,ACTL6A,RPS6KA1,ACTG1
HT29	cell&exo	120	hsa04960	Aldosterone-regulated sodium reabsorption	9	37	0.56	0.0058	9606.ENSP00000215832,9606.ENSP00000256078,9606.ENSP00000340989,9606.ENSP00000344220,9606.ENSP00000356790,9606.ENSP00000383199,9606.ENSP00000408005,9606.ENSP00000428056,9606.ENSP00000445306	MAPK1,KRAS,SFN,PDPK1,ATP1B1,NEDD4L,SLC9A3R2,PIK3R1,ATP1A1
HT29	cell&exo	121	hsa04072	Phospholipase D signaling pathway	21	147	0.32	0.0061	9606.ENSP00000215832,9606.ENSP00000246792,9606.ENSP00000256078,9606.ENSP00000256196,9606.ENSP00000262187,9606.ENSP00000262948,9606.ENSP00000275493,9606.ENSP00000298316,9606.ENSP00000302486,9606.ENSP00000340944,9606.ENSP00000354558,9606.ENSP00000358548,9606.ENSP00000360141,9606.ENSP00000362014,9606.ENSP00000364907,9606.ENSP00000373905,9606.ENSP00000376345,9606.ENSP00000400175,9606.ENSP00000400717,…	MAPK1,RRAS,KRAS,RRAS2,RHEB,MAP2K2,EGFR,ARF6,MAP2K1,PTPN11,MTOR,NRAS,GNAS,DNM1,SYK,DNM2,GRB2,RHOA,GNA13,PIK3R1,PLCB3
HT29	cell&exo	122	hsa04261	Adrenergic signaling in cardiomyocytes	21	147	0.32	0.0061	9606.ENSP00000215832,9606.ENSP00000272298,9606.ENSP00000286548,9606.ENSP00000312999,9606.ENSP00000324804,9606.ENSP00000325074,9606.ENSP00000326031,9606.ENSP00000341779,9606.ENSP00000343027,9606.ENSP00000345230,9606.ENSP00000351022,9606.ENSP00000356790,9606.ENSP00000357516,9606.ENSP00000358867,9606.ENSP00000360141,9606.ENSP00000378769,9606.ENSP00000392043,9606.ENSP00000417963,9606.ENSP00000440045,…	MAPK1,CALM2,GNAQ,GNAI2,PPP2R1A,PPP2R2A,PPP1CA,PPP1CC,GNAI1,TPM4,TPM1,ATP1B1,TPM3,GNAI3,GNAS,PPP1CB,ATP2B1,PPP2R5D,ATP2A2,PLCB3,ATP1A1
HT29	cell&exo	123	hsa04912	GnRH signaling pathway	15	89	0.4	0.0062	9606.ENSP00000078429,9606.ENSP00000215832,9606.ENSP00000256078,9606.ENSP00000262948,9606.ENSP00000272298,9606.ENSP00000275493,9606.ENSP00000286548,9606.ENSP00000302486,9606.ENSP00000345083,9606.ENSP00000358548,9606.ENSP00000360141,9606.ENSP00000362680,9606.ENSP00000376345,9606.ENSP00000383118,9606.ENSP00000443631	GNA11,MAPK1,KRAS,MAP2K2,CALM2,EGFR,GNAQ,MAP2K1,MAP2K3,NRAS,GNAS,SRC,GRB2,CDC42,PLCB3
HT29	cell&exo	124	hsa04728	Dopaminergic synapse	19	128	0.34	0.0065	9606.ENSP00000272298,9606.ENSP00000286548,9606.ENSP00000305260,9606.ENSP00000307078,9606.ENSP00000312999,9606.ENSP00000324804,9606.ENSP00000325074,9606.ENSP00000326031,9606.ENSP00000341779,9606.ENSP00000343027,9606.ENSP00000358867,9606.ENSP00000360021,9606.ENSP00000360141,9606.ENSP00000367309,9606.ENSP00000378323,9606.ENSP00000378769,9606.ENSP00000417963,9606.ENSP00000443631,9606.ENSP00000481878	CALM2,GNAQ,GNB2,KIF5B,GNAI2,PPP2R1A,PPP2R2A,PPP1CA,PPP1CC,GNAI1,GNAI3,GNG12,GNAS,MAOB,PPP3CA,PPP1CB,PPP2R5D,PLCB3,GNB1
HT29	cell&exo	125	hsa04010	MAPK signaling pathway	34	288	0.24	0.0066	9606.ENSP00000215832,9606.ENSP00000246792,9606.ENSP00000248553,9606.ENSP00000249071,9606.ENSP00000250559,9606.ENSP00000256078,9606.ENSP00000256196,9606.ENSP00000262948,9606.ENSP00000268035,9606.ENSP00000269305,9606.ENSP00000274376,9606.ENSP00000275493,9606.ENSP00000282412,9606.ENSP00000290277,9606.ENSP00000302486,9606.ENSP00000314067,9606.ENSP00000317272,9606.ENSP00000345083,9606.ENSP00000351015,…	MAPK1,RRAS,HSPB1,RAC2,RAP1B,KRAS,RRAS2,MAP2K2,IGF1R,TP53,RASA1,EGFR,PPM1B,ARAF,MAP2K1,PAK2,MET,MAP2K3,NF1,EPHA2,NRAS,FLNA,GNG12,STK4,HSPA1B,RPS6KA3,GRB2,PPP3CA,CDC42,RELA,STMN1,FLNB,HSPA8,RPS6KA1
HT29	cell&exo	126	hsa05218	Melanoma	13	72	0.43	0.0069	9606.ENSP00000215832,9606.ENSP00000256078,9606.ENSP00000261769,9606.ENSP00000262948,9606.ENSP00000268035,9606.ENSP00000269305,9606.ENSP00000275493,9606.ENSP00000290277,9606.ENSP00000293288,9606.ENSP00000302486,9606.ENSP00000317272,9606.ENSP00000358548,9606.ENSP00000428056	MAPK1,KRAS,CDH1,MAP2K2,IGF1R,TP53,EGFR,ARAF,BAX,MAP2K1,MET,NRAS,PIK3R1
HT29	cell&exo	127	hsa01523	Antifolate resistance	8	31	0.58	0.0071	9606.ENSP00000236959,9606.ENSP00000260118,9606.ENSP00000285238,9606.ENSP00000333667,9606.ENSP00000366084,9606.ENSP00000371253,9606.ENSP00000382342,9606.ENSP00000384273	ATIC,GGH,ABCC3,SHMT2,ABCC4,GART,ABCC1,RELA
HT29	cell&exo	128	hsa04140	Autophagy - animal	19	130	0.33	0.0073	9606.ENSP00000215832,9606.ENSP00000246792,9606.ENSP00000256078,9606.ENSP00000256196,9606.ENSP00000256383,9606.ENSP00000262187,9606.ENSP00000262948,9606.ENSP00000265062,9606.ENSP00000268035,9606.ENSP00000300935,9606.ENSP00000302486,9606.ENSP00000333298,9606.ENSP00000344220,9606.ENSP00000345347,9606.ENSP00000346148,9606.ENSP00000354558,9606.ENSP00000358548,9606.ENSP00000374455,9606.ENSP00000428056	MAPK1,RRAS,KRAS,RRAS2,EIF2S1,RHEB,MAP2K2,RAB7A,IGF1R,RAB8A,MAP2K1,LAMP1,PDPK1,HMGB1,PRKAA1,MTOR,NRAS,SQSTM1,PIK3R1
HT29	cell&exo	129	hsa04971	Gastric acid secretion	13	73	0.42	0.0075	9606.ENSP00000272298,9606.ENSP00000286548,9606.ENSP00000312999,9606.ENSP00000343027,9606.ENSP00000349960,9606.ENSP00000356042,9606.ENSP00000356790,9606.ENSP00000358867,9606.ENSP00000360141,9606.ENSP00000419412,9606.ENSP00000443631,9606.ENSP00000445306,9606.ENSP00000458162	CALM2,GNAQ,GNAI2,GNAI1,ACTB,EZR,ATP1B1,GNAI3,GNAS,SLC4A2,PLCB3,ATP1A1,ACTG1
HT29	cell&exo	130	hsa04012	ErbB signaling pathway	14	83	0.4	0.0081	9606.ENSP00000215832,9606.ENSP00000256078,9606.ENSP00000262948,9606.ENSP00000275493,9606.ENSP00000290277,9606.ENSP00000302486,9606.ENSP00000314067,9606.ENSP00000341189,9606.ENSP00000354558,9606.ENSP00000358548,9606.ENSP00000362680,9606.ENSP00000376345,9606.ENSP00000428056,9606.ENSP00000469413	MAPK1,KRAS,MAP2K2,EGFR,ARAF,MAP2K1,PAK2,PTK2,MTOR,NRAS,SRC,GRB2,PIK3R1,PAK4
HT29	cell&exo	131	hsa00062	Fatty acid elongation	7	25	0.62	0.0085	9606.ENSP00000215567,9606.ENSP00000278353,9606.ENSP00000285093,9606.ENSP00000325136,9606.ENSP00000357535,9606.ENSP00000367086,9606.ENSP00000370023	TECR,HSD17B12,ACAA2,HADHB,ECHS1,ACOT7,HADHA
HT29	cell&exo	132	hsa03015	mRNA surveillance pathway	15	93	0.38	0.0085	9606.ENSP00000240185,9606.ENSP00000269349,9606.ENSP00000274311,9606.ENSP00000306117,9606.ENSP00000313007,9606.ENSP00000324804,9606.ENSP00000325074,9606.ENSP00000326031,9606.ENSP00000326261,9606.ENSP00000341779,9606.ENSP00000353741,9606.ENSP00000378769,9606.ENSP00000398131,9606.ENSP00000417963,9606.ENSP00000470142	TARDBP,EIF4A3,PELO,DDX19A,PABPC1,PPP2R1A,PPP2R2A,PPP1CA,SRRM1,PPP1CC,ETF1,PPP1CB,GSPT1,PPP2R5D,UPF1
HT29	cell&exo	133	hsa05221	Acute myeloid leukemia	12	66	0.43	0.0089	9606.ENSP00000215832,9606.ENSP00000256078,9606.ENSP00000262948,9606.ENSP00000264657,9606.ENSP00000290277,9606.ENSP00000302486,9606.ENSP00000354558,9606.ENSP00000358548,9606.ENSP00000376345,9606.ENSP00000377508,9606.ENSP00000384273,9606.ENSP00000428056	MAPK1,KRAS,MAP2K2,STAT3,ARAF,MAP2K1,MTOR,NRAS,GRB2,JUP,RELA,PIK3R1
HT29	cell&exo	134	hsa04914	Progesterone-mediated oocyte maturation	15	94	0.37	0.0091	9606.ENSP00000176763,9606.ENSP00000215832,9606.ENSP00000256078,9606.ENSP00000268035,9606.ENSP00000290277,9606.ENSP00000302486,9606.ENSP00000312999,9606.ENSP00000335153,9606.ENSP00000343027,9606.ENSP00000358867,9606.ENSP00000360609,9606.ENSP00000368884,9606.ENSP00000378699,9606.ENSP00000428056,9606.ENSP00000435412	STK10,MAPK1,KRAS,IGF1R,ARAF,MAP2K1,GNAI2,HSP90AA1,GNAI1,GNAI3,HSP90AB1,RPS6KA3,CDK1,PIK3R1,RPS6KA1
HT29	cell&exo	135	hsa04512	ECM-receptor interaction	14	88	0.37	0.0123	9606.ENSP00000007722,9606.ENSP00000200181,9606.ENSP00000222399,9606.ENSP00000252999,9606.ENSP00000258341,9606.ENSP00000261023,9606.ENSP00000283249,9606.ENSP00000296181,9606.ENSP00000296585,9606.ENSP00000363827,9606.ENSP00000368678,9606.ENSP00000379350,9606.ENSP00000386896,9606.ENSP00000398632	ITGA3,ITGB4,LAMB1,LAMA5,LAMC1,ITGAV,ITGB6,ITGB5,ITGA2,HSPG2,AGRN,ITGB1,ITGA6,CD44
HT29	cell&exo	136	hsa04926	Relaxin signaling pathway	18	128	0.32	0.0126	9606.ENSP00000215832,9606.ENSP00000256078,9606.ENSP00000262948,9606.ENSP00000275493,9606.ENSP00000302486,9606.ENSP00000305260,9606.ENSP00000312999,9606.ENSP00000343027,9606.ENSP00000358548,9606.ENSP00000358867,9606.ENSP00000360021,9606.ENSP00000360141,9606.ENSP00000362680,9606.ENSP00000376345,9606.ENSP00000384273,9606.ENSP00000428056,9606.ENSP00000443631,9606.ENSP00000481878	MAPK1,KRAS,MAP2K2,EGFR,MAP2K1,GNB2,GNAI2,GNAI1,NRAS,GNAI3,GNG12,GNAS,SRC,GRB2,RELA,PIK3R1,PLCB3,GNB1
HT29	cell&exo	137	hsa04972	Pancreatic secretion	15	98	0.35	0.0126	9606.ENSP00000222120,9606.ENSP00000250559,9606.ENSP00000261890,9606.ENSP00000262094,9606.ENSP00000262461,9606.ENSP00000286548,9606.ENSP00000300935,9606.ENSP00000356790,9606.ENSP00000360141,9606.ENSP00000392043,9606.ENSP00000400175,9606.ENSP00000419412,9606.ENSP00000440045,9606.ENSP00000443631,9606.ENSP00000445306	RAB3D,RAP1B,RAB11A,RAB27B,SLC12A2,GNAQ,RAB8A,ATP1B1,GNAS,ATP2B1,RHOA,SLC4A2,ATP2A2,PLCB3,ATP1A1
HT29	cell&exo	138	hsa03030	DNA replication	8	36	0.52	0.0142	9606.ENSP00000216122,9606.ENSP00000262105,9606.ENSP00000264156,9606.ENSP00000265056,9606.ENSP00000307288,9606.ENSP00000368458,9606.ENSP00000419665,9606.ENSP00000480987	MCM5,MCM4,MCM6,MCM2,MCM7,PCNA,SSBP1,MCM3
HT29	cell&exo	139	hsa00340	Histidine metabolism	6	21	0.63	0.0144	9606.ENSP00000261733,9606.ENSP00000325548,9606.ENSP00000345774,9606.ENSP00000346827,9606.ENSP00000367309,9606.ENSP00000387123	ALDH2,CNDP2,ALDH3A2,ALDH9A1,MAOB,ALDH7A1
HT29	cell&exo	140	hsa04660	T cell receptor signaling pathway	15	101	0.34	0.0156	9606.ENSP00000215832,9606.ENSP00000256078,9606.ENSP00000262948,9606.ENSP00000302486,9606.ENSP00000314067,9606.ENSP00000344220,9606.ENSP00000345731,9606.ENSP00000358548,9606.ENSP00000376345,9606.ENSP00000378323,9606.ENSP00000383118,9606.ENSP00000384273,9606.ENSP00000400175,9606.ENSP00000428056,9606.ENSP00000469413	MAPK1,KRAS,MAP2K2,MAP2K1,PAK2,PDPK1,DLG1,NRAS,GRB2,PPP3CA,CDC42,RELA,RHOA,PIK3R1,PAK4
HT29	cell&exo	141	hsa00410	beta-Alanine metabolism	7	29	0.55	0.0158	9606.ENSP00000261733,9606.ENSP00000325548,9606.ENSP00000345774,9606.ENSP00000346827,9606.ENSP00000357535,9606.ENSP00000370023,9606.ENSP00000387123	ALDH2,CNDP2,ALDH3A2,ALDH9A1,ECHS1,HADHA,ALDH7A1
HT29	cell&exo	142	hsa04625	C-type lectin receptor signaling pathway	15	102	0.34	0.0166	9606.ENSP00000215832,9606.ENSP00000246792,9606.ENSP00000256078,9606.ENSP00000256196,9606.ENSP00000272298,9606.ENSP00000340944,9606.ENSP00000351273,9606.ENSP00000354394,9606.ENSP00000358548,9606.ENSP00000362680,9606.ENSP00000364907,9606.ENSP00000378323,9606.ENSP00000384273,9606.ENSP00000400175,9606.ENSP00000428056	MAPK1,RRAS,KRAS,RRAS2,CALM2,PTPN11,CASP8,STAT1,NRAS,SRC,SYK,PPP3CA,RELA,RHOA,PIK3R1
HT29	cell&exo	143	hsa05134	Legionellosis	10	55	0.43	0.0174	9606.ENSP00000310226,9606.ENSP00000331901,9606.ENSP00000339063,9606.ENSP00000351273,9606.ENSP00000351777,9606.ENSP00000364801,9606.ENSP00000373620,9606.ENSP00000384273,9606.ENSP00000432083,9606.ENSP00000463393	RAB1B,EEF1G,EEF1A1,CASP8,VCP,HSPA1B,HSPD1,RELA,HSPA8,SEC22B
HT29	cell&exo	144	hsa05167	Kaposi sarcoma-associated herpesvirus infection	23	187	0.26	0.0174	9606.ENSP00000215832,9606.ENSP00000256078,9606.ENSP00000262948,9606.ENSP00000264657,9606.ENSP00000269305,9606.ENSP00000272298,9606.ENSP00000293288,9606.ENSP00000302486,9606.ENSP00000305260,9606.ENSP00000343204,9606.ENSP00000344456,9606.ENSP00000351273,9606.ENSP00000354394,9606.ENSP00000354558,9606.ENSP00000358548,9606.ENSP00000360021,9606.ENSP00000362680,9606.ENSP00000364907,9606.ENSP00000378323,…	MAPK1,KRAS,MAP2K2,STAT3,TP53,CALM2,BAX,MAP2K1,GNB2,JAK1,CTNNB1,CASP8,STAT1,MTOR,NRAS,GNG12,SRC,SYK,PPP3CA,HLA-A,RELA,PIK3R1,GNB1
HT29	cell&exo	145	hsa00260	Glycine, serine and threonine metabolism	8	38	0.49	0.0176	9606.ENSP00000205402,9606.ENSP00000333667,9606.ENSP00000358417,9606.ENSP00000359991,9606.ENSP00000365773,9606.ENSP00000367309,9606.ENSP00000378854,9606.ENSP00000387123	DLD,SHMT2,PHGDH,PGAM1,PSAT1,MAOB,PSPH,ALDH7A1
HT29	cell&exo	146	hsa04928	Parathyroid hormone synthesis, secretion and action	15	103	0.33	0.0176	9606.ENSP00000078429,9606.ENSP00000215832,9606.ENSP00000262613,9606.ENSP00000275493,9606.ENSP00000286548,9606.ENSP00000290277,9606.ENSP00000302486,9606.ENSP00000312999,9606.ENSP00000337261,9606.ENSP00000343027,9606.ENSP00000358867,9606.ENSP00000360141,9606.ENSP00000400175,9606.ENSP00000400717,9606.ENSP00000443631	GNA11,MAPK1,SLC9A3R1,EGFR,GNAQ,ARAF,MAP2K1,GNAI2,ARHGEF1,GNAI1,GNAI3,GNAS,RHOA,GNA13,PLCB3
HT29	cell&exo	147	hsa03060	Protein export	6	23	0.59	0.0197	9606.ENSP00000243253,9606.ENSP00000267884,9606.ENSP00000324173,9606.ENSP00000328023,9606.ENSP00000337688,9606.ENSP00000418401	SEC61A1,SRP14,HSPA5,SRPR,SEC62,SRPRB
HT29	cell&exo	148	hsa05152	Tuberculosis	21	168	0.27	0.0197	9606.ENSP00000215832,9606.ENSP00000219150,9606.ENSP00000264649,9606.ENSP00000265062,9606.ENSP00000272298,9606.ENSP00000273047,9606.ENSP00000293288,9606.ENSP00000297185,9606.ENSP00000333298,9606.ENSP00000343204,9606.ENSP00000351273,9606.ENSP00000352522,9606.ENSP00000353444,9606.ENSP00000354394,9606.ENSP00000362680,9606.ENSP00000364907,9606.ENSP00000373620,9606.ENSP00000378323,9606.ENSP00000384273,…	MAPK1,CORO1A,ATP6V0A1,RAB7A,CALM2,RAB5A,BAX,HSPA9,LAMP1,JAK1,CASP8,ATP6V1H,RAB5B,STAT1,SRC,SYK,HSPD1,PPP3CA,RELA,RHOA,RAB5C
HT29	cell&exo	149	hsa04664	Fc epsilon RI signaling pathway	11	66	0.39	0.0202	9606.ENSP00000215832,9606.ENSP00000249071,9606.ENSP00000256078,9606.ENSP00000262948,9606.ENSP00000302486,9606.ENSP00000344220,9606.ENSP00000345083,9606.ENSP00000358548,9606.ENSP00000364907,9606.ENSP00000376345,9606.ENSP00000428056	MAPK1,RAC2,KRAS,MAP2K2,MAP2K1,PDPK1,MAP2K3,NRAS,SYK,GRB2,PIK3R1
HT29	cell&exo	150	hsa00920	Sulfur metabolism	4	10	0.77	0.0215	9606.ENSP00000260324,9606.ENSP00000292147,9606.ENSP00000380402,9606.ENSP00000406157	SQRDL,ETHE1,MPST,PAPSS2
HT29	cell&exo	151	hsa04068	FoxO signaling pathway	17	127	0.3	0.0215	9606.ENSP00000215832,9606.ENSP00000256078,9606.ENSP00000262948,9606.ENSP00000264657,9606.ENSP00000268035,9606.ENSP00000275493,9606.ENSP00000290277,9606.ENSP00000302486,9606.ENSP00000323867,9606.ENSP00000343535,9606.ENSP00000344220,9606.ENSP00000346148,9606.ENSP00000358548,9606.ENSP00000361892,9606.ENSP00000376345,9606.ENSP00000406162,9606.ENSP00000428056	MAPK1,KRAS,MAP2K2,STAT3,IGF1R,EGFR,ARAF,MAP2K1,PRKAG1,USP7,PDPK1,PRKAA1,NRAS,STK4,GRB2,PRMT1,PIK3R1
HT29	cell&exo	152	hsa05231	Choline metabolism in cancer	14	96	0.33	0.0215	9606.ENSP00000215832,9606.ENSP00000249071,9606.ENSP00000256078,9606.ENSP00000262187,9606.ENSP00000262948,9606.ENSP00000275493,9606.ENSP00000302486,9606.ENSP00000344220,9606.ENSP00000354558,9606.ENSP00000358548,9606.ENSP00000363852,9606.ENSP00000376345,9606.ENSP00000428056,9606.ENSP00000483313	MAPK1,RAC2,KRAS,RHEB,MAP2K2,EGFR,MAP2K1,PDPK1,MTOR,NRAS,SLC44A1,GRB2,PIK3R1,WASF2
HT29	cell&exo	153	hsa05225	Hepatocellular carcinoma	20	160	0.27	0.0226	9606.ENSP00000215832,9606.ENSP00000256078,9606.ENSP00000262948,9606.ENSP00000268035,9606.ENSP00000269305,9606.ENSP00000275493,9606.ENSP00000290277,9606.ENSP00000293288,9606.ENSP00000302486,9606.ENSP00000317272,9606.ENSP00000344456,9606.ENSP00000349960,9606.ENSP00000354558,9606.ENSP00000358548,9606.ENSP00000358727,9606.ENSP00000376345,9606.ENSP00000397552,9606.ENSP00000428056,9606.ENSP00000434516,…	MAPK1,KRAS,MAP2K2,IGF1R,TP53,EGFR,ARAF,BAX,MAP2K1,MET,CTNNB1,ACTB,MTOR,NRAS,GSTO1,GRB2,ACTL6A,PIK3R1,TXNRD1,ACTG1
HT29	cell&exo	154	hsa00061	Fatty acid biosynthesis	5	17	0.64	0.0235	9606.ENSP00000304592,9606.ENSP00000339787,9606.ENSP00000348429,9606.ENSP00000350012,9606.ENSP00000483300	FASN,ACSL4,ACSL5,ACSL3,ACACA
HT29	cell&exo	155	hsa04726	Serotonergic synapse	15	108	0.31	0.0238	9606.ENSP00000215832,9606.ENSP00000256078,9606.ENSP00000286548,9606.ENSP00000290277,9606.ENSP00000302486,9606.ENSP00000305260,9606.ENSP00000312999,9606.ENSP00000343027,9606.ENSP00000358548,9606.ENSP00000358867,9606.ENSP00000360021,9606.ENSP00000360141,9606.ENSP00000367309,9606.ENSP00000443631,9606.ENSP00000481878	MAPK1,KRAS,GNAQ,ARAF,MAP2K1,GNB2,GNAI2,GNAI1,NRAS,GNAI3,GNG12,GNAS,MAOB,PLCB3,GNB1
HT29	cell&exo	156	hsa00040	Pentose and glucuronate interconversions	7	33	0.5	0.0254	9606.ENSP00000267814,9606.ENSP00000303356,9606.ENSP00000319501,9606.ENSP00000338703,9606.ENSP00000343838,9606.ENSP00000352584,9606.ENSP00000361140	SORD,DCXR,UGDH,UGP2,UGT1A10,AKR1B10,AKR1A1
HT29	cell&exo	157	hsa00190	Oxidative phosphorylation	17	130	0.29	0.0254	9606.ENSP00000234396,9606.ENSP00000262030,9606.ENSP00000263774,9606.ENSP00000264649,9606.ENSP00000264932,9606.ENSP00000268379,9606.ENSP00000273398,9606.ENSP00000276390,9606.ENSP00000290299,9606.ENSP00000300688,9606.ENSP00000349142,9606.ENSP00000352522,9606.ENSP00000354876,9606.ENSP00000358737,9606.ENSP00000362329,9606.ENSP00000381736,9606.ENSP00000392709	ATP6V1B1,ATP5B,NDUFS3,ATP6V0A1,SDHA,UQCRC2,ATP6V1A,ATP6V1B2,ATP5O,ATP5L,ATP5C1,ATP6V1H,MT-CO2,ATP5F1,PPA1,ATP5A1,NDUFS1
HT29	cell&exo	158	hsa00790	Folate biosynthesis	6	25	0.55	0.0254	9606.ENSP00000234454,9606.ENSP00000260118,9606.ENSP00000281243,9606.ENSP00000290349,9606.ENSP00000352584,9606.ENSP00000369927	SPR,GGH,QDPR,CBR1,AKR1B10,AKR1C3
HT29	cell&exo	159	hsa04917	Prolactin signaling pathway	11	69	0.37	0.0254	9606.ENSP00000215832,9606.ENSP00000256078,9606.ENSP00000262948,9606.ENSP00000264657,9606.ENSP00000302486,9606.ENSP00000354394,9606.ENSP00000358548,9606.ENSP00000362680,9606.ENSP00000376345,9606.ENSP00000384273,9606.ENSP00000428056	MAPK1,KRAS,MAP2K2,STAT3,MAP2K1,STAT1,NRAS,SRC,GRB2,RELA,PIK3R1
HT29	cell&exo	160	hsa05142	Chagas disease	14	99	0.32	0.0254	9606.ENSP00000078429,9606.ENSP00000215832,9606.ENSP00000286548,9606.ENSP00000312999,9606.ENSP00000320866,9606.ENSP00000324804,9606.ENSP00000325074,9606.ENSP00000343027,9606.ENSP00000351273,9606.ENSP00000358867,9606.ENSP00000360141,9606.ENSP00000384273,9606.ENSP00000428056,9606.ENSP00000443631	GNA11,MAPK1,GNAQ,GNAI2,CALR,PPP2R1A,PPP2R2A,GNAI1,CASP8,GNAI3,GNAS,RELA,PIK3R1,PLCB3
HT29	cell&exo	161	hsa04024	cAMP signaling pathway	24	208	0.23	0.0259	9606.ENSP00000215832,9606.ENSP00000246792,9606.ENSP00000249071,9606.ENSP00000250559,9606.ENSP00000256196,9606.ENSP00000262948,9606.ENSP00000272298,9606.ENSP00000302486,9606.ENSP00000312999,9606.ENSP00000317985,9606.ENSP00000326031,9606.ENSP00000341779,9606.ENSP00000343027,9606.ENSP00000356790,9606.ENSP00000358867,9606.ENSP00000360141,9606.ENSP00000366084,9606.ENSP00000378769,9606.ENSP00000384273,…	MAPK1,RRAS,RAC2,RAP1B,RRAS2,MAP2K2,CALM2,MAP2K1,GNAI2,ROCK2,PPP1CA,PPP1CC,GNAI1,ATP1B1,GNAI3,GNAS,ABCC4,PPP1CB,RELA,ATP2B1,RHOA,PIK3R1,ATP2A2,ATP1A1
HT29	cell&exo	162	hsa04213	Longevity regulating pathway - multiple species	10	61	0.38	0.0283	9606.ENSP00000256078,9606.ENSP00000268035,9606.ENSP00000323867,9606.ENSP00000346148,9606.ENSP00000354558,9606.ENSP00000358548,9606.ENSP00000362649,9606.ENSP00000364801,9606.ENSP00000428056,9606.ENSP00000432083	KRAS,IGF1R,PRKAG1,PRKAA1,MTOR,NRAS,HDAC1,HSPA1B,PIK3R1,HSPA8
HT29	cell&exo	163	hsa00053	Ascorbate and aldarate metabolism	6	26	0.53	0.0288	9606.ENSP00000261733,9606.ENSP00000319501,9606.ENSP00000343838,9606.ENSP00000345774,9606.ENSP00000346827,9606.ENSP00000387123	ALDH2,UGDH,UGT1A10,ALDH3A2,ALDH9A1,ALDH7A1
HT29	cell&exo	164	hsa05166	Human T-cell leukemia virus 1 infection	24	211	0.23	0.0294	9606.ENSP00000215832,9606.ENSP00000247461,9606.ENSP00000256078,9606.ENSP00000262948,9606.ENSP00000269305,9606.ENSP00000293288,9606.ENSP00000302486,9606.ENSP00000316029,9606.ENSP00000320866,9606.ENSP00000343204,9606.ENSP00000345731,9606.ENSP00000349078,9606.ENSP00000357858,9606.ENSP00000358548,9606.ENSP00000360671,9606.ENSP00000361635,9606.ENSP00000378323,9606.ENSP00000379873,9606.ENSP00000384273,…	MAPK1,CANX,KRAS,MAP2K2,TP53,BAX,MAP2K1,TLN1,CALR,JAK1,DLG1,FDPS,BUB3,NRAS,SLC25A5,VDAC2,PPP3CA,HLA-A,RELA,XPO1,SLC2A1,PIK3R1,VDAC3,RAN
HT29	cell&exo	165	hsa05226	Gastric cancer	18	144	0.27	0.0294	9606.ENSP00000215832,9606.ENSP00000256078,9606.ENSP00000261769,9606.ENSP00000262948,9606.ENSP00000269305,9606.ENSP00000275493,9606.ENSP00000290277,9606.ENSP00000293288,9606.ENSP00000302486,9606.ENSP00000304669,9606.ENSP00000317272,9606.ENSP00000344456,9606.ENSP00000354558,9606.ENSP00000358548,9606.ENSP00000376345,9606.ENSP00000377508,9606.ENSP00000384638,9606.ENSP00000428056	MAPK1,KRAS,CDH1,MAP2K2,TP53,EGFR,ARAF,BAX,MAP2K1,CTNNA1,MET,CTNNB1,MTOR,NRAS,GRB2,JUP,CTNNA2,PIK3R1
HT29	cell&exo	166	hsa05222	Small cell lung cancer	13	92	0.32	0.0309	9606.ENSP00000007722,9606.ENSP00000222399,9606.ENSP00000252999,9606.ENSP00000258341,9606.ENSP00000261023,9606.ENSP00000269305,9606.ENSP00000293288,9606.ENSP00000296585,9606.ENSP00000341189,9606.ENSP00000379350,9606.ENSP00000384273,9606.ENSP00000386896,9606.ENSP00000428056	ITGA3,LAMB1,LAMA5,LAMC1,ITGAV,TP53,BAX,ITGA2,PTK2,ITGB1,RELA,ITGA6,PIK3R1
HT29	cell&exo	167	hsa04612	Antigen processing and presentation	10	63	0.37	0.0329	9606.ENSP00000247461,9606.ENSP00000300289,9606.ENSP00000302961,9606.ENSP00000320866,9606.ENSP00000324173,9606.ENSP00000335153,9606.ENSP00000360609,9606.ENSP00000364801,9606.ENSP00000379873,9606.ENSP00000432083	CANX,PDIA3,HSPA4,CALR,HSPA5,HSP90AA1,HSP90AB1,HSPA1B,HLA-A,HSPA8
HT29	cell&exo	168	hsa04916	Melanogenesis	13	95	0.31	0.0379	9606.ENSP00000215832,9606.ENSP00000256078,9606.ENSP00000262948,9606.ENSP00000272298,9606.ENSP00000286548,9606.ENSP00000302486,9606.ENSP00000312999,9606.ENSP00000343027,9606.ENSP00000344456,9606.ENSP00000358548,9606.ENSP00000358867,9606.ENSP00000360141,9606.ENSP00000443631	MAPK1,KRAS,MAP2K2,CALM2,GNAQ,MAP2K1,GNAI2,GNAI1,CTNNB1,NRAS,GNAI3,GNAS,PLCB3
HT29	cell&exo	169	hsa00983	Drug metabolism - other enzymes	11	75	0.34	0.039	9606.ENSP00000232607,9606.ENSP00000298556,9606.ENSP00000300738,9606.ENSP00000301634,9606.ENSP00000321584,9606.ENSP00000343838,9606.ENSP00000345096,9606.ENSP00000356853,9606.ENSP00000358727,9606.ENSP00000376886,9606.ENSP00000419851	UMPS,HPRT1,RRM1,TK1,IMPDH2,UGT1A10,IMPDH1,UCK2,GSTO1,NME1-NME2,GMPS
HT29	cell&exo	170	hsa00240	Pyrimidine metabolism	9	56	0.38	0.0411	9606.ENSP00000232607,9606.ENSP00000257770,9606.ENSP00000264705,9606.ENSP00000300738,9606.ENSP00000301634,9606.ENSP00000304802,9606.ENSP00000354532,9606.ENSP00000356853,9606.ENSP00000376886	UMPS,NT5E,CAD,RRM1,TK1,DTYMK,PNP,UCK2,NME1-NME2
HT29	cell&exo	171	hsa00220	Arginine biosynthesis	5	21	0.55	0.0429	9606.ENSP00000245206,9606.ENSP00000307188,9606.ENSP00000359539,9606.ENSP00000361471,9606.ENSP00000384296	GOT2,ASL,GOT1,ASS1,ACY1
HT29	cell&exo	172	hsa04934	Cushing syndrome	18	153	0.24	0.0462	9606.ENSP00000078429,9606.ENSP00000215832,9606.ENSP00000250559,9606.ENSP00000261693,9606.ENSP00000262948,9606.ENSP00000275493,9606.ENSP00000279146,9606.ENSP00000286548,9606.ENSP00000302486,9606.ENSP00000312999,9606.ENSP00000343027,9606.ENSP00000344456,9606.ENSP00000355518,9606.ENSP00000358867,9606.ENSP00000360141,9606.ENSP00000379721,9606.ENSP00000442464,9606.ENSP00000443631	GNA11,MAPK1,RAP1B,SCARB1,MAP2K2,EGFR,AIP,GNAQ,MAP2K1,GNAI2,GNAI1,CTNNB1,FH,GNAI3,GNAS,USP8,NCEH1,PLCB3
HT29	cell&exo	173	hsa00052	Galactose metabolism	6	30	0.47	0.0471	9606.ENSP00000269848,9606.ENSP00000338703,9606.ENSP00000345771,9606.ENSP00000352584,9606.ENSP00000370517,9606.ENSP00000465930	PFKL,UGP2,PFKM,AKR1B10,PFKP,GALK1
HT29	cell&exo	174	hsa05164	Influenza A	19	165	0.23	0.0473	9606.ENSP00000215832,9606.ENSP00000254322,9606.ENSP00000256383,9606.ENSP00000261890,9606.ENSP00000262948,9606.ENSP00000293288,9606.ENSP00000302486,9606.ENSP00000343204,9606.ENSP00000343701,9606.ENSP00000349078,9606.ENSP00000349960,9606.ENSP00000351273,9606.ENSP00000354394,9606.ENSP00000360671,9606.ENSP00000384273,9606.ENSP00000384863,9606.ENSP00000428056,9606.ENSP00000438483,9606.ENSP00000458162	MAPK1,DNAJB1,EIF2S1,RAB11A,MAP2K2,BAX,MAP2K1,JAK1,KPNA1,FDPS,ACTB,CASP8,STAT1,SLC25A5,RELA,XPO1,PIK3R1,KPNA2,ACTG1
HT29	cell&exo	175	hsa04662	B cell receptor signaling pathway	11	78	0.32	0.0474	9606.ENSP00000215832,9606.ENSP00000249071,9606.ENSP00000256078,9606.ENSP00000262948,9606.ENSP00000302486,9606.ENSP00000358548,9606.ENSP00000364907,9606.ENSP00000376345,9606.ENSP00000378323,9606.ENSP00000384273,9606.ENSP00000428056	MAPK1,RAC2,KRAS,MAP2K2,MAP2K1,NRAS,SYK,GRB2,PPP3CA,RELA,PIK3R1
HT29	cell&exo	176	hsa04725	Cholinergic synapse	14	110	0.27	0.0482	9606.ENSP00000078429,9606.ENSP00000215832,9606.ENSP00000256078,9606.ENSP00000286548,9606.ENSP00000302486,9606.ENSP00000305260,9606.ENSP00000312999,9606.ENSP00000343027,9606.ENSP00000358548,9606.ENSP00000358867,9606.ENSP00000360021,9606.ENSP00000428056,9606.ENSP00000443631,9606.ENSP00000481878	GNA11,MAPK1,KRAS,GNAQ,MAP2K1,GNB2,GNAI2,GNAI1,NRAS,GNAI3,GNG12,PIK3R1,PLCB3,GNB1
HT29	onlyexo	1	hsa04144	Endocytosis	16	241	0.81	1.77e-06	9606.ENSP00000244040,9606.ENSP00000294742,9606.ENSP00000297265,9606.ENSP00000301765,9606.ENSP00000324810,9606.ENSP00000327116,9606.ENSP00000332973,9606.ENSP00000354621,9606.ENSP00000356705,9606.ENSP00000363921,9606.ENSP00000379873,9606.ENSP00000380998,9606.ENSP00000386884,9606.ENSP00000411825,9606.ENSP00000432279,9606.ENSP00000469240	RAB22A,ARPC5,CHMP4C,VPS37C,MVB12A,EHD3,SMAD3,SMURF1,DNM3,PARD3,HLA-A,CHMP1A,CXCR4,PDCD6IP,CHMP1B,CHMP2A
HT29	onlyexo	2	hsa04512	ECM-receptor interaction	11	88	1.09	1.77e-06	9606.ENSP00000260356,9606.ENSP00000282588,9606.ENSP00000295550,9606.ENSP00000300527,9606.ENSP00000339730,9606.ENSP00000346839,9606.ENSP00000355180,9606.ENSP00000355361,9606.ENSP00000370542,9606.ENSP00000399421,9606.ENSP00000452786	THBS1,ITGA1,COL6A3,COL6A2,THBS4,FN1,COL6A1,CD47,SDC1,CD36,ITGB3
HT29	onlyexo	3	hsa05165	Human papillomavirus infection	16	325	0.68	4.98e-05	9606.ENSP00000221138,9606.ENSP00000256646,9606.ENSP00000260356,9606.ENSP00000263388,9606.ENSP00000277541,9606.ENSP00000282588,9606.ENSP00000295550,9606.ENSP00000300527,9606.ENSP00000321537,9606.ENSP00000339730,9606.ENSP00000346839,9606.ENSP00000355180,9606.ENSP00000359719,9606.ENSP00000363921,9606.ENSP00000379873,9606.ENSP00000452786	PPP2CB,NOTCH2,THBS1,NOTCH3,NOTCH1,ITGA1,COL6A3,COL6A2,LLGL1,THBS4,FN1,COL6A1,PRKACB,PARD3,HLA-A,ITGB3
HT29	onlyexo	4	hsa04530	Tight junction	10	156	0.8	0.00067	9606.ENSP00000221138,9606.ENSP00000256001,9606.ENSP00000295522,9606.ENSP00000301071,9606.ENSP00000312734,9606.ENSP00000321537,9606.ENSP00000351908,9606.ENSP00000359719,9606.ENSP00000363921,9606.ENSP00000378577	PPP2CB,ACTR3B,CLDN1,TUBA1A,RAB8B,LLGL1,MAP3K5,PRKACB,PARD3,CLDN3
HT29	onlyexo	5	hsa04145	Phagosome	9	142	0.79	0.0017	9606.ENSP00000054666,9606.ENSP00000225275,9606.ENSP00000260356,9606.ENSP00000301071,9606.ENSP00000318697,9606.ENSP00000339730,9606.ENSP00000379873,9606.ENSP00000399421,9606.ENSP00000452786	VAMP3,MPO,THBS1,TUBA1A,TUBB6,THBS4,HLA-A,CD36,ITGB3
HT29	onlyexo	6	hsa04510	Focal adhesion	10	198	0.69	0.0031	9606.ENSP00000260356,9606.ENSP00000282588,9606.ENSP00000295550,9606.ENSP00000300527,9606.ENSP00000339730,9606.ENSP00000346671,9606.ENSP00000346839,9606.ENSP00000355180,9606.ENSP00000384515,9606.ENSP00000452786	THBS1,ITGA1,COL6A3,COL6A2,THBS4,FYN,FN1,COL6A1,PARVB,ITGB3
HT29	onlyexo	7	hsa05144	Malaria	5	46	1.02	0.008	9606.ENSP00000243077,9606.ENSP00000260356,9606.ENSP00000339730,9606.ENSP00000370542,9606.ENSP00000399421	LRP1,THBS1,THBS4,SDC1,CD36
HT29	onlyexo	8	hsa04919	Thyroid hormone signaling pathway	7	119	0.76	0.0129	9606.ENSP00000245451,9606.ENSP00000256646,9606.ENSP00000263388,9606.ENSP00000277541,9606.ENSP00000359719,9606.ENSP00000452786,9606.ENSP00000482457	BMP4,NOTCH2,NOTCH3,NOTCH1,PRKACB,ITGB3,PLCG2
HT29	onlyexo	9	hsa04611	Platelet activation	7	122	0.75	0.0133	9606.ENSP00000279227,9606.ENSP00000338864,9606.ENSP00000346671,9606.ENSP00000359719,9606.ENSP00000428924,9606.ENSP00000452786,9606.ENSP00000482457	FERMT3,RASGRP2,FYN,PRKACB,LYN,ITGB3,PLCG2
HT29	onlyexo	10	hsa04360	Axon guidance	8	177	0.64	0.021	9606.ENSP00000245323,9606.ENSP00000265361,9606.ENSP00000332118,9606.ENSP00000346671,9606.ENSP00000351338,9606.ENSP00000363921,9606.ENSP00000386884,9606.ENSP00000482457	EFNB2,SEMA3C,EPHB3,FYN,PLXNB1,PARD3,CXCR4,PLCG2
HT29	onlyexo	11	hsa04514	Cell adhesion molecules	7	137	0.7	0.021	9606.ENSP00000295522,9606.ENSP00000320084,9606.ENSP00000352513,9606.ENSP00000370542,9606.ENSP00000378577,9606.ENSP00000379873,9606.ENSP00000411355	CLDN1,CD276,MPZL1,SDC1,CLDN3,HLA-A,PTPRC
HT29	onlyexo	12	hsa04520	Adherens junction	5	67	0.86	0.0233	9606.ENSP00000281092,9606.ENSP00000332973,9606.ENSP00000346671,9606.ENSP00000363921,9606.ENSP00000400010	FER,SMAD3,FYN,PARD3,PTPRJ
HT29	onlyexo	13	hsa05206	MicroRNAs in cancer	7	160	0.63	0.0421	9606.ENSP00000256646,9606.ENSP00000260356,9606.ENSP00000263388,9606.ENSP00000277541,9606.ENSP00000371798,9606.ENSP00000452786,9606.ENSP00000482457	NOTCH2,THBS1,NOTCH3,NOTCH1,FSCN1,ITGB3,PLCG2
SW620	cell&exo	1	hsa03010	Ribosome	55	130	1.06	5.49e-33	9606.ENSP00000222247,9606.ENSP00000225430,9606.ENSP00000251453,9606.ENSP00000259469,9606.ENSP00000262584,9606.ENSP00000270625,9606.ENSP00000296674,9606.ENSP00000302896,9606.ENSP00000307889,9606.ENSP00000309334,9606.ENSP00000309830,9606.ENSP00000311430,9606.ENSP00000318646,9606.ENSP00000322419,9606.ENSP00000339095,9606.ENSP00000339795,9606.ENSP00000341885,9606.ENSP00000346001,9606.ENSP00000346015,…	RPL18A,RPL19,RPS16,RPL35,RPL8,RPS11,RPS23,RPS9,RPL13,RPL15,RPL38,RPL4,RPS15A,RPLP2,RPS7,RPL7,RPS2,RPL3,RPL27A,RPL21,RPS3A,RPSA,RPL22,RPL12,RPL5,RPL7A,RPS4X,RPL10A,RPS6,RPL34,RPL14,RPS8,RPS14,RPL31,RPL23A,RPS18,RPL17,RPL9,RPL6,RPL10,RPS24,RPL23,RPL30,RPS20,RPS25,RPS13,RPL18,RPLP0,RPL28,RPL26,RPL36,RPL27,RPS19,RPS5,RPS10
SW620	cell&exo	2	hsa03050	Proteasome	22	43	1.14	4.48e-14	9606.ENSP00000044462,9606.ENSP00000157812,9606.ENSP00000216455,9606.ENSP00000219313,9606.ENSP00000223321,9606.ENSP00000259457,9606.ENSP00000261303,9606.ENSP00000261712,9606.ENSP00000270586,9606.ENSP00000271308,9606.ENSP00000290541,9606.ENSP00000309474,9606.ENSP00000310129,9606.ENSP00000310572,9606.ENSP00000348442,9606.ENSP00000362334,9606.ENSP00000386541,9606.ENSP00000391211,9606.ENSP00000401802,…	PSMA4,PSMC4,PSMA3,PSMD7,PSMA2,PSMB7,PSMC1,PSMD11,PSMB6,PSMA5,PSMB4,PSMD1,PSMD2,PSMC5,PSMD12,PSMB2,PSMD14,PSMC2,PSMC6,PSMA1,ADRM1,PSMC3
SW620	cell&exo	3	hsa04144	Endocytosis	43	241	0.69	8.61e-14	9606.ENSP00000217402,9606.ENSP00000220325,9606.ENSP00000228825,9606.ENSP00000229340,9606.ENSP00000238497,9606.ENSP00000251968,9606.ENSP00000253794,9606.ENSP00000254950,9606.ENSP00000261890,9606.ENSP00000263168,9606.ENSP00000264710,9606.ENSP00000265062,9606.ENSP00000273047,9606.ENSP00000292807,9606.ENSP00000298316,9606.ENSP00000299138,9606.ENSP00000300935,9606.ENSP00000307078,9606.ENSP00000312262,…	CHMP4B,EHD4,ARPC3,RAB35,VPS4B,TSG101,VPS25,VPS4A,RAB11A,CAPZA1,RAB10,RAB7A,RAB5A,AP2M1,ARF6,VPS35,RAB8A,KIF5B,ADRBK1,CHMP4A,MVB12A,AP2A2,ARPC5L,AP2A1,TFRC,RAB5B,VTA1,HSPA1B,VPS28,VPS36,HLA-A,CDC42,ARPC4,EPS15L1,RHOA,CHMP3,PDCD6IP,HSPA8,IST1,RAB5C,EHD1,CLTC,AP2B1
SW620	cell&exo	4	hsa05020	Prion disease	44	265	0.65	2.95e-13	9606.ENSP00000044462,9606.ENSP00000157812,9606.ENSP00000215832,9606.ENSP00000216455,9606.ENSP00000217244,9606.ENSP00000219313,9606.ENSP00000223321,9606.ENSP00000248437,9606.ENSP00000256383,9606.ENSP00000259457,9606.ENSP00000261303,9606.ENSP00000261712,9606.ENSP00000262030,9606.ENSP00000262506,9606.ENSP00000270586,9606.ENSP00000271308,9606.ENSP00000290541,9606.ENSP00000301071,9606.ENSP00000307078,…	PSMA4,PSMC4,MAPK1,PSMA3,CSNK2A1,PSMD7,PSMA2,TUBA4A,EIF2S1,PSMB7,PSMC1,PSMD11,ATP5B,CSNK2A2,PSMB6,PSMA5,PSMB4,TUBA1A,KIF5B,PSMD1,PSMD2,PSMC5,HSPA5,TUBB,TUBB4B,FYN,PSMD12,STIP1,MT-CO2,SLC25A5,VDAC2,PSMB2,HSPA1B,CSNK2B,SLC25A6,ATP5A1,PSMD14,PSMC2,PSMC6,PSMA1,VDAC3,HSPA8,ADRM1,PSMC3
SW620	cell&exo	5	hsa01200	Carbon metabolism	30	117	0.84	3.74e-13	9606.ENSP00000205402,9606.ENSP00000229239,9606.ENSP00000229270,9606.ENSP00000234590,9606.ENSP00000245206,9606.ENSP00000252603,9606.ENSP00000265838,9606.ENSP00000270776,9606.ENSP00000309477,9606.ENSP00000321259,9606.ENSP00000324105,9606.ENSP00000327070,9606.ENSP00000333667,9606.ENSP00000335304,9606.ENSP00000342056,9606.ENSP00000355518,9606.ENSP00000356015,9606.ENSP00000358417,9606.ENSP00000359539,…	DLD,GAPDH,TPI1,ENO1,GOT2,PGLS,ACAT1,PGD,ACO1,TALDO1,ENO3,MDH2,SHMT2,DLST,CS,FH,ACAT2,PHGDH,GOT1,PGAM1,PGK1,PSAT1,PFKP,G6PD,ALDOA,PSPH,IDH1,TKT,GPI,SUCLG2
SW620	cell&exo	6	hsa04530	Tight junction	34	156	0.77	3.74e-13	9606.ENSP00000216181,9606.ENSP00000245932,9606.ENSP00000248437,9606.ENSP00000252699,9606.ENSP00000262613,9606.ENSP00000263238,9606.ENSP00000281537,9606.ENSP00000300935,9606.ENSP00000301071,9606.ENSP00000302961,9606.ENSP00000324804,9606.ENSP00000325074,9606.ENSP00000340274,9606.ENSP00000345731,9606.ENSP00000346148,9606.ENSP00000349486,9606.ENSP00000349960,9606.ENSP00000353408,9606.ENSP00000353590,…	MYH9,VASP,TUBA4A,ACTN4,SLC9A3R1,ACTR3,TJP1,RAB8A,TUBA1A,HSPA4,PPP2R1A,PPP2R2A,RAP2C,DLG1,PRKAA1,SCRIB,ACTB,MSN,MYH10,ARHGEF2,EZR,F11R,RAB13,PCNA,LLGL2,ACTN1,ITGB1,CDC42,RDX,RHOA,TJP2,MYL6,ACTG1,MYL12B
SW620	cell&exo	7	hsa05010	Alzheimer disease	50	355	0.58	6.44e-13	9606.ENSP00000044462,9606.ENSP00000157812,9606.ENSP00000215832,9606.ENSP00000216455,9606.ENSP00000217244,9606.ENSP00000219313,9606.ENSP00000223321,9606.ENSP00000229239,9606.ENSP00000248437,9606.ENSP00000256078,9606.ENSP00000256383,9606.ENSP00000259457,9606.ENSP00000260408,9606.ENSP00000261303,9606.ENSP00000261712,9606.ENSP00000262030,9606.ENSP00000262506,9606.ENSP00000270586,9606.ENSP00000271308,…	PSMA4,PSMC4,MAPK1,PSMA3,CSNK2A1,PSMD7,PSMA2,GAPDH,TUBA4A,KRAS,EIF2S1,PSMB7,ADAM10,PSMC1,PSMD11,ATP5B,CSNK2A2,PSMB6,PSMA5,CALM2,ARAF,PSMB4,TUBA1A,MAP2K1,KIF5B,PSMD1,PSMD2,PSMC5,RTN4,TUBB,TUBB4B,CTNNB1,PSMD12,MT-CO2,NRAS,SLC25A5,VDAC2,PSMB2,CSNK2B,SLC25A6,ATP5A1,PSMD14,PSMC2,PSMC6,PSMA1,MME,VDAC3,CAPN1,ADRM1,PSMC3
SW620	cell&exo	8	hsa05012	Parkinson disease	41	240	0.67	6.44e-13	9606.ENSP00000044462,9606.ENSP00000157812,9606.ENSP00000216455,9606.ENSP00000219313,9606.ENSP00000223321,9606.ENSP00000246957,9606.ENSP00000248437,9606.ENSP00000256383,9606.ENSP00000259457,9606.ENSP00000261303,9606.ENSP00000261712,9606.ENSP00000262030,9606.ENSP00000270586,9606.ENSP00000271308,9606.ENSP00000272298,9606.ENSP00000290541,9606.ENSP00000301071,9606.ENSP00000307078,9606.ENSP00000309474,…	PSMA4,PSMC4,PSMA3,PSMD7,PSMA2,TRAP1,TUBA4A,EIF2S1,PSMB7,PSMC1,PSMD11,ATP5B,PSMB6,PSMA5,CALM2,PSMB4,TUBA1A,KIF5B,PSMD1,PSMD2,PSMC5,HSPA5,UBA1,TUBB,TUBB4B,PSMD12,MT-CO2,GNAI3,SLC25A5,VDAC2,PSMB2,SLC25A6,ATP5A1,PSMD14,PSMC2,PSMC6,PSMA1,PARK7,VDAC3,ADRM1,PSMC3
SW620	cell&exo	9	hsa04810	Regulation of actin cytoskeleton	38	209	0.69	8.41e-13	9606.ENSP00000200181,9606.ENSP00000211998,9606.ENSP00000215832,9606.ENSP00000216181,9606.ENSP00000225655,9606.ENSP00000228825,9606.ENSP00000252699,9606.ENSP00000256078,9606.ENSP00000256196,9606.ENSP00000268182,9606.ENSP00000290277,9606.ENSP00000296585,9606.ENSP00000302486,9606.ENSP00000316338,9606.ENSP00000326031,9606.ENSP00000341779,9606.ENSP00000345361,9606.ENSP00000349960,9606.ENSP00000353408,…	ITGB4,VCL,MAPK1,MYH9,PFN1,ARPC3,ACTN4,KRAS,RRAS2,IQGAP1,ARAF,ITGA2,MAP2K1,BAIAP2,PPP1CA,PPP1CC,ARPC5L,ACTB,MSN,MYH10,NCKAP1,IQGAP3,EZR,NRAS,ACTN1,ITGB1,DIAPH1,CDC42,RDX,ITGA6,ARPC4,RHOA,GNA13,CFL1,ACTG1,MYL12B,CYFIP1,WASF2
SW620	cell&exo	10	hsa01230	Biosynthesis of amino acids	24	73	0.95	1.11e-12	9606.ENSP00000175506,9606.ENSP00000229239,9606.ENSP00000229270,9606.ENSP00000234590,9606.ENSP00000245206,9606.ENSP00000303147,9606.ENSP00000307188,9606.ENSP00000309477,9606.ENSP00000321259,9606.ENSP00000324105,9606.ENSP00000325425,9606.ENSP00000333667,9606.ENSP00000342056,9606.ENSP00000358417,9606.ENSP00000359539,9606.ENSP00000359991,9606.ENSP00000361471,9606.ENSP00000362413,9606.ENSP00000365773,…	ASNS,GAPDH,TPI1,ENO1,GOT2,MAT2A,ASL,ACO1,TALDO1,ENO3,MAT2B,SHMT2,CS,PHGDH,GOT1,PGAM1,ASS1,PGK1,PSAT1,PFKP,ALDOA,PSPH,IDH1,TKT
SW620	cell&exo	11	hsa04520	Adherens junction	23	67	0.97	1.63e-12	9606.ENSP00000211998,9606.ENSP00000215832,9606.ENSP00000217244,9606.ENSP00000252699,9606.ENSP00000261769,9606.ENSP00000262506,9606.ENSP00000268182,9606.ENSP00000281537,9606.ENSP00000304669,9606.ENSP00000316338,9606.ENSP00000344456,9606.ENSP00000346671,9606.ENSP00000349960,9606.ENSP00000365042,9606.ENSP00000377941,9606.ENSP00000382004,9606.ENSP00000383118,9606.ENSP00000391592,9606.ENSP00000400175,…	VCL,MAPK1,CSNK2A1,ACTN4,CDH1,CSNK2A2,IQGAP1,TJP1,CTNNA1,BAIAP2,CTNNB1,FYN,ACTB,CSNK2B,ACTN1,CTNND1,CDC42,PTPN6,RHOA,LMO7,ACTG1,YES1,WASF2
SW620	cell&exo	12	hsa05130	Pathogenic Escherichia coli infection	35	187	0.71	3.22e-12	9606.ENSP00000215832,9606.ENSP00000216181,9606.ENSP00000228825,9606.ENSP00000229239,9606.ENSP00000248437,9606.ENSP00000262613,9606.ENSP00000281537,9606.ENSP00000288235,9606.ENSP00000298316,9606.ENSP00000301071,9606.ENSP00000303145,9606.ENSP00000316338,9606.ENSP00000318195,9606.ENSP00000324527,9606.ENSP00000339001,9606.ENSP00000340944,9606.ENSP00000341289,9606.ENSP00000345361,9606.ENSP00000346671,…	MAPK1,MYH9,ARPC3,GAPDH,TUBA4A,SLC9A3R1,TJP1,MYO1E,ARF6,TUBA1A,TMED10,BAIAP2,NCL,MYO1D,TUBB,PTPN11,TUBB4B,ARPC5L,FYN,ACTB,MYH10,NCKAP1,ARHGEF2,EZR,ABI1,MYO1B,ITGB1,CDC42,ARPC4,PTPN6,RHOA,GNA13,ACTG1,CYFIP1,WASF2
SW620	cell&exo	13	hsa05014	Amyotrophic lateral sclerosis	45	352	0.54	1.68e-10	9606.ENSP00000044462,9606.ENSP00000157812,9606.ENSP00000216455,9606.ENSP00000219313,9606.ENSP00000223321,9606.ENSP00000225655,9606.ENSP00000248437,9606.ENSP00000256383,9606.ENSP00000259457,9606.ENSP00000261303,9606.ENSP00000261712,9606.ENSP00000262030,9606.ENSP00000270586,9606.ENSP00000271308,9606.ENSP00000273047,9606.ENSP00000290541,9606.ENSP00000300935,9606.ENSP00000301071,9606.ENSP00000307078,…	PSMA4,PSMC4,PSMA3,PSMD7,PSMA2,PFN1,TUBA4A,EIF2S1,PSMB7,PSMC1,PSMD11,ATP5B,PSMB6,PSMA5,RAB5A,PSMB4,RAB8A,TUBA1A,KIF5B,PSMD1,PSMD2,PSMC5,HSPA5,SRSF7,TUBB,TUBB4B,HNRNPA1,HNRNPA2B1,PSMD12,ACTB,VCP,DCTN1,MT-CO2,ANXA7,PSMB2,SRSF3,ATP5A1,PSMD14,PSMC2,ANXA11,PSMC6,PSMA1,ACTG1,ADRM1,PSMC3
SW620	cell&exo	14	hsa05017	Spinocerebellar ataxia	27	135	0.74	4.83e-10	9606.ENSP00000044462,9606.ENSP00000157812,9606.ENSP00000216455,9606.ENSP00000219313,9606.ENSP00000223321,9606.ENSP00000259457,9606.ENSP00000261303,9606.ENSP00000261712,9606.ENSP00000270586,9606.ENSP00000271308,9606.ENSP00000290541,9606.ENSP00000309474,9606.ENSP00000310129,9606.ENSP00000310572,9606.ENSP00000348442,9606.ENSP00000360671,9606.ENSP00000361635,9606.ENSP00000362334,9606.ENSP00000370589,…	PSMA4,PSMC4,PSMA3,PSMD7,PSMA2,PSMB7,PSMC1,PSMD11,PSMB6,PSMA5,PSMB4,PSMD1,PSMD2,PSMC5,PSMD12,SLC25A5,VDAC2,PSMB2,NOP56,SLC25A6,PSMD14,PSMC2,PSMC6,PSMA1,VDAC3,ADRM1,PSMC3
SW620	cell&exo	15	hsa05016	Huntington disease	40	298	0.56	5.85e-10	9606.ENSP00000044462,9606.ENSP00000157812,9606.ENSP00000216455,9606.ENSP00000219313,9606.ENSP00000223321,9606.ENSP00000248437,9606.ENSP00000259457,9606.ENSP00000261303,9606.ENSP00000261712,9606.ENSP00000262030,9606.ENSP00000270586,9606.ENSP00000271308,9606.ENSP00000290541,9606.ENSP00000292807,9606.ENSP00000301071,9606.ENSP00000307078,9606.ENSP00000309474,9606.ENSP00000310129,9606.ENSP00000310572,…	PSMA4,PSMC4,PSMA3,PSMD7,PSMA2,TUBA4A,PSMB7,PSMC1,PSMD11,ATP5B,PSMB6,PSMA5,PSMB4,AP2M1,TUBA1A,KIF5B,PSMD1,PSMD2,PSMC5,AP2A2,TUBB,TUBB4B,PSMD12,AP2A1,DCTN1,MT-CO2,SLC25A5,VDAC2,PSMB2,SLC25A6,ATP5A1,PSMD14,PSMC2,PSMC6,PSMA1,VDAC3,ADRM1,CLTC,PSMC3,AP2B1
SW620	cell&exo	16	hsa05132	Salmonella infection	33	209	0.63	7.17e-10	9606.ENSP00000215832,9606.ENSP00000225655,9606.ENSP00000228825,9606.ENSP00000229239,9606.ENSP00000261667,9606.ENSP00000265062,9606.ENSP00000273047,9606.ENSP00000273130,9606.ENSP00000298316,9606.ENSP00000299767,9606.ENSP00000302486,9606.ENSP00000334373,9606.ENSP00000335153,9606.ENSP00000344456,9606.ENSP00000345361,9606.ENSP00000346032,9606.ENSP00000348965,9606.ENSP00000349960,9606.ENSP00000353444,…	MAPK1,PFN1,ARPC3,GAPDH,KPNA3,RAB7A,RAB5A,DYNC1LI1,ARF6,HSP90B1,MAP2K1,KPNA4,HSP90AA1,CTNNB1,ARPC5L,ANXA2,DYNC1H1,ACTB,RAB5B,NCKAP1,FLNA,HSP90AB1,ABI1,AHNAK,CDC42,ARPC4,RHOA,FLNB,RAB5C,ACTG1,MYL12B,DYNLL2,CYFIP1
SW620	cell&exo	17	hsa05100	Bacterial invasion of epithelial cells	19	70	0.87	4.88e-09	9606.ENSP00000211998,9606.ENSP00000228825,9606.ENSP00000261769,9606.ENSP00000304669,9606.ENSP00000344456,9606.ENSP00000345361,9606.ENSP00000349960,9606.ENSP00000352264,9606.ENSP00000367991,9606.ENSP00000379350,9606.ENSP00000379975,9606.ENSP00000383118,9606.ENSP00000388169,9606.ENSP00000391249,9606.ENSP00000400175,9606.ENSP00000458162,9606.ENSP00000479606,9606.ENSP00000479861,9606.ENSP00000483313	VCL,ARPC3,CDH1,CTNNA1,CTNNB1,ARPC5L,ACTB,CD2AP,SEPT8,ITGB1,ILK,CDC42,ARPC4,SEPT9,RHOA,ACTG1,CLTC,SEPT2,WASF2
SW620	cell&exo	18	hsa00970	Aminoacyl-tRNA biosynthesis	15	44	0.97	2.69e-08	9606.ENSP00000231572,9606.ENSP00000256854,9606.ENSP00000261772,9606.ENSP00000262027,9606.ENSP00000264161,9606.ENSP00000281828,9606.ENSP00000307567,9606.ENSP00000325448,9606.ENSP00000347495,9606.ENSP00000355890,9606.ENSP00000362576,9606.ENSP00000364794,9606.ENSP00000364815,9606.ENSP00000373918,9606.ENSP00000387710	RARS,NARS,AARS,MARS,DARS,FARSB,QARS,KARS,WARS,EPRS,YARS,IARS,VARS,GARS,TARS
SW620	cell&exo	19	hsa03040	Spliceosome	23	132	0.68	1.13e-07	9606.ENSP00000215829,9606.ENSP00000225792,9606.ENSP00000244020,9606.ENSP00000258962,9606.ENSP00000269349,9606.ENSP00000283179,9606.ENSP00000305556,9606.ENSP00000305790,9606.ENSP00000307863,9606.ENSP00000317123,9606.ENSP00000325376,9606.ENSP00000325905,9606.ENSP00000336741,9606.ENSP00000341826,9606.ENSP00000362820,9606.ENSP00000364801,9606.ENSP00000365439,9606.ENSP00000376276,9606.ENSP00000379475,…	SNRPD3,DDX5,SRSF6,SRSF1,EIF4A3,HNRNPU,PCBP1,SF3B3,U2AF2,SNRNP200,HNRNPM,SRSF7,DHX15,HNRNPA1,SRSF3,HSPA1B,HNRNPK,SRSF2,DDX39B,EFTUD2,HSPA8,HNRNPC,PRPF8
SW620	cell&exo	20	hsa05205	Proteoglycans in cancer	28	196	0.59	1.29e-07	9606.ENSP00000215832,9606.ENSP00000225792,9606.ENSP00000256078,9606.ENSP00000256196,9606.ENSP00000268182,9606.ENSP00000290277,9606.ENSP00000296585,9606.ENSP00000302486,9606.ENSP00000326031,9606.ENSP00000340944,9606.ENSP00000341779,9606.ENSP00000344456,9606.ENSP00000349960,9606.ENSP00000353408,9606.ENSP00000356042,9606.ENSP00000358548,9606.ENSP00000358866,9606.ENSP00000363827,9606.ENSP00000369757,…	MAPK1,DDX5,KRAS,RRAS2,IQGAP1,ARAF,ITGA2,MAP2K1,PPP1CA,PTPN11,PPP1CC,CTNNB1,ACTB,MSN,EZR,NRAS,FLNA,HSPG2,RPS6,GRB2,ITGB1,CDC42,RDX,EIF4B,PTPN6,RHOA,FLNB,ACTG1
SW620	cell&exo	21	hsa04510	Focal adhesion	28	198	0.58	1.49e-07	9606.ENSP00000200181,9606.ENSP00000211998,9606.ENSP00000215832,9606.ENSP00000245932,9606.ENSP00000250559,9606.ENSP00000252699,9606.ENSP00000296585,9606.ENSP00000302486,9606.ENSP00000316029,9606.ENSP00000324422,9606.ENSP00000326031,9606.ENSP00000341779,9606.ENSP00000344456,9606.ENSP00000346671,9606.ENSP00000349960,9606.ENSP00000355180,9606.ENSP00000358866,9606.ENSP00000376345,9606.ENSP00000377941,…	ITGB4,VCL,MAPK1,VASP,RAP1B,ACTN4,ITGA2,MAP2K1,TLN1,ZYX,PPP1CA,PPP1CC,CTNNB1,FYN,ACTB,COL6A1,FLNA,GRB2,ACTN1,ITGB1,ILK,DIAPH1,CDC42,ITGA6,RHOA,FLNB,ACTG1,MYL12B
SW620	cell&exo	22	hsa01100	Metabolic pathways	97	1447	0.26	3.41e-07	9606.ENSP00000175506,9606.ENSP00000205402,9606.ENSP00000216392,9606.ENSP00000216605,9606.ENSP00000216951,9606.ENSP00000216962,9606.ENSP00000217426,9606.ENSP00000222553,9606.ENSP00000226299,9606.ENSP00000229239,9606.ENSP00000229270,9606.ENSP00000234590,9606.ENSP00000236959,9606.ENSP00000245206,9606.ENSP00000252603,9606.ENSP00000253792,9606.ENSP00000261733,9606.ENSP00000262027,9606.ENSP00000262030,…	ASNS,DLD,PYGL,MTHFD1,GSS,PYGB,AHCY,NAMPT,LAP3,GAPDH,TPI1,ENO1,ATIC,GOT2,PGLS,ACLY,ALDH2,MARS,ATP5B,PPAT,CAD,ACAT1,SORD,PGD,ATP6V1A,ATP6V1B2,AKR1B1,ADK,FUK,CBR1,RPN1,HPRT1,RRM1,MAT2A,DCXR,FASN,ASL,QARS,ACO1,PFAS,UGDH,TALDO1,IMPDH2,ENO3,MAT2B,CNDP2,MDH2,SHMT2,DLST,UGP2,GANAB,PRDX6,CS,MCCC2,ALDH9A1,AK2,GMPPA,MT-CO2,FH,EPRS,ACAT2,PHGDH,GSTO1,AHCYL1,GOT1,PGAM1,ASS1,CTPS1,PGK1,GLO1,PSAT1,SRM,APRT,DUT,P…
SW620	cell&exo	23	hsa05203	Viral carcinogenesis	26	182	0.59	3.83e-07	9606.ENSP00000215832,9606.ENSP00000244537,9606.ENSP00000248975,9606.ENSP00000252699,9606.ENSP00000256078,9606.ENSP00000261303,9606.ENSP00000264335,9606.ENSP00000265734,9606.ENSP00000306330,9606.ENSP00000345731,9606.ENSP00000346762,9606.ENSP00000349486,9606.ENSP00000358548,9606.ENSP00000361930,9606.ENSP00000364403,9606.ENSP00000365439,9606.ENSP00000376345,9606.ENSP00000377941,9606.ENSP00000378699,…	MAPK1,HIST1H4F,YWHAH,ACTN4,KRAS,PSMC1,YWHAE,CDK6,YWHAG,DLG1,SND1,SCRIB,NRAS,YWHAB,UBR4,HNRNPK,GRB2,ACTN1,CDK1,YWHAZ,HLA-A,DDX3X,CDC42,RHOA,VDAC3,LYN
SW620	cell&exo	24	hsa00270	Cysteine and methionine metabolism	14	49	0.89	4.64e-07	9606.ENSP00000216951,9606.ENSP00000217426,9606.ENSP00000245206,9606.ENSP00000303147,9606.ENSP00000325425,9606.ENSP00000327070,9606.ENSP00000358417,9606.ENSP00000358814,9606.ENSP00000359539,9606.ENSP00000365773,9606.ENSP00000366156,9606.ENSP00000379386,9606.ENSP00000385746,9606.ENSP00000445175	GSS,AHCY,GOT2,MAT2A,MAT2B,MDH2,PHGDH,AHCYL1,GOT1,PSAT1,SRM,LDHB,SMS,LDHA
SW620	cell&exo	25	hsa04141	Protein processing in endoplasmic reticulum	24	165	0.6	8.91e-07	9606.ENSP00000247461,9606.ENSP00000254322,9606.ENSP00000256383,9606.ENSP00000261735,9606.ENSP00000286091,9606.ENSP00000296255,9606.ENSP00000299767,9606.ENSP00000300289,9606.ENSP00000303366,9606.ENSP00000314030,9606.ENSP00000318687,9606.ENSP00000324173,9606.ENSP00000327801,9606.ENSP00000335153,9606.ENSP00000340466,9606.ENSP00000351777,9606.ENSP00000360609,9606.ENSP00000364801,9606.ENSP00000378721,…	CANX,DNAJB1,EIF2S1,ERP29,PDIA4,RPN1,HSP90B1,PDIA3,LMAN2,DNAJA2,HSPH1,HSPA5,P4HB,HSP90AA1,GANAB,VCP,HSP90AB1,HSPA1B,SEC31A,PDIA6,DDOST,CAPN1,HSPA8,HYOU1
SW620	cell&exo	26	hsa04670	Leukocyte transendothelial migration	19	109	0.68	1.69e-06	9606.ENSP00000211998,9606.ENSP00000245932,9606.ENSP00000250559,9606.ENSP00000252699,9606.ENSP00000304669,9606.ENSP00000340944,9606.ENSP00000344456,9606.ENSP00000349960,9606.ENSP00000353408,9606.ENSP00000356042,9606.ENSP00000357005,9606.ENSP00000358867,9606.ENSP00000377941,9606.ENSP00000379350,9606.ENSP00000382004,9606.ENSP00000383118,9606.ENSP00000400175,9606.ENSP00000458162,9606.ENSP00000463559	VCL,VASP,RAP1B,ACTN4,CTNNA1,PTPN11,CTNNB1,ACTB,MSN,EZR,F11R,GNAI3,ACTN1,ITGB1,CTNND1,CDC42,RHOA,ACTG1,MYL12B
SW620	cell&exo	27	hsa03013	RNA transport	23	160	0.59	1.87e-06	9606.ENSP00000216190,9606.ENSP00000220849,9606.ENSP00000253039,9606.ENSP00000256383,9606.ENSP00000269349,9606.ENSP00000290158,9606.ENSP00000293831,9606.ENSP00000306117,9606.ENSP00000313007,9606.ENSP00000319169,9606.ENSP00000326261,9606.ENSP00000339063,9606.ENSP00000354125,9606.ENSP00000358140,9606.ENSP00000362688,9606.ENSP00000379475,9606.ENSP00000388806,9606.ENSP00000401470,9606.ENSP00000416255,…	EIF3D,EIF3E,EIF2S3,EIF2S1,EIF4A3,KPNB1,EIF4A1,DDX19A,PABPC1,PRMT5,SRRM1,EEF1A1,EIF3B,EIF3A,EIF3I,DDX39B,EIF4B,RANGAP1,EIF4G1,EIF3F,RAN,UPF1,CYFIP1
SW620	cell&exo	28	hsa05131	Shigellosis	27	218	0.53	2.38e-06	9606.ENSP00000211998,9606.ENSP00000215832,9606.ENSP00000225655,9606.ENSP00000228825,9606.ENSP00000252699,9606.ENSP00000254810,9606.ENSP00000298316,9606.ENSP00000316029,9606.ENSP00000316176,9606.ENSP00000345361,9606.ENSP00000349960,9606.ENSP00000354837,9606.ENSP00000367991,9606.ENSP00000377941,9606.ENSP00000379350,9606.ENSP00000379975,9606.ENSP00000381565,9606.ENSP00000383118,9606.ENSP00000388169,…	VCL,MAPK1,PFN1,ARPC3,ACTN4,H3F3B,ARF6,TLN1,UBE2N,ARPC5L,ACTB,ARHGEF2,SEPT8,ACTN1,ITGB1,ILK,DIAPH1,CDC42,ARPC4,SEPT9,RHOA,CAPN1,ACTG1,MYL12B,PLCD3,SEPT2,WASF2
SW620	cell&exo	29	hsa04145	Phagosome	21	142	0.6	3.95e-06	9606.ENSP00000219150,9606.ENSP00000247461,9606.ENSP00000248437,9606.ENSP00000261693,9606.ENSP00000265062,9606.ENSP00000273047,9606.ENSP00000273130,9606.ENSP00000273398,9606.ENSP00000276390,9606.ENSP00000296585,9606.ENSP00000301071,9606.ENSP00000339001,9606.ENSP00000341289,9606.ENSP00000348965,9606.ENSP00000349960,9606.ENSP00000353224,9606.ENSP00000353444,9606.ENSP00000379350,9606.ENSP00000379873,…	CORO1A,CANX,TUBA4A,SCARB1,RAB7A,RAB5A,DYNC1LI1,ATP6V1A,ATP6V1B2,ITGA2,TUBA1A,TUBB,TUBB4B,DYNC1H1,ACTB,TFRC,RAB5B,ITGB1,HLA-A,RAB5C,ACTG1
SW620	cell&exo	30	hsa00010	Glycolysis / Gluconeogenesis	14	65	0.77	7.3e-06	9606.ENSP00000205402,9606.ENSP00000229239,9606.ENSP00000229270,9606.ENSP00000234590,9606.ENSP00000261733,9606.ENSP00000324105,9606.ENSP00000346827,9606.ENSP00000359991,9606.ENSP00000362413,9606.ENSP00000370517,9606.ENSP00000378669,9606.ENSP00000379386,9606.ENSP00000405573,9606.ENSP00000445175	DLD,GAPDH,TPI1,ENO1,ALDH2,ENO3,ALDH9A1,PGAM1,PGK1,PFKP,ALDOA,LDHB,GPI,LDHA
SW620	cell&exo	31	hsa04217	Necroptosis	21	149	0.58	7.51e-06	9606.ENSP00000216392,9606.ENSP00000216962,9606.ENSP00000217402,9606.ENSP00000238497,9606.ENSP00000254950,9606.ENSP00000273550,9606.ENSP00000308405,9606.ENSP00000324205,9606.ENSP00000332194,9606.ENSP00000335153,9606.ENSP00000345347,9606.ENSP00000355759,9606.ENSP00000360609,9606.ENSP00000360671,9606.ENSP00000361635,9606.ENSP00000370808,9606.ENSP00000405575,9606.ENSP00000423563,9606.ENSP00000428845,…	PYGL,PYGB,CHMP4B,VPS4B,VPS4A,FTH1,H2AFV,CHMP4A,HIST2H2AC,HSP90AA1,HMGB1,PARP1,HSP90AB1,SLC25A5,VDAC2,SLC25A6,CHMP3,H2AFY,VDAC3,CAPN1,DNM1L
SW620	cell&exo	32	hsa05230	Central carbon metabolism in cancer	14	69	0.74	1.28e-05	9606.ENSP00000215832,9606.ENSP00000256078,9606.ENSP00000261622,9606.ENSP00000302486,9606.ENSP00000358548,9606.ENSP00000359991,9606.ENSP00000370517,9606.ENSP00000377192,9606.ENSP00000379386,9606.ENSP00000390265,9606.ENSP00000416293,9606.ENSP00000444408,9606.ENSP00000445175,9606.ENSP00000463978	MAPK1,KRAS,SLC7A5,MAP2K1,NRAS,PGAM1,PFKP,G6PD,LDHB,IDH1,SLC2A1,SLC1A5,LDHA,SLC16A3
SW620	cell&exo	33	hsa00020	Citrate cycle (TCA cycle)	9	29	0.93	5.6e-05	9606.ENSP00000205402,9606.ENSP00000253792,9606.ENSP00000309477,9606.ENSP00000327070,9606.ENSP00000335304,9606.ENSP00000342056,9606.ENSP00000355518,9606.ENSP00000390265,9606.ENSP00000419325	DLD,ACLY,ACO1,MDH2,DLST,CS,FH,IDH1,SUCLG2
SW620	cell&exo	34	hsa00620	Pyruvate metabolism	10	38	0.85	5.68e-05	9606.ENSP00000205402,9606.ENSP00000261733,9606.ENSP00000265838,9606.ENSP00000327070,9606.ENSP00000346827,9606.ENSP00000355518,9606.ENSP00000356015,9606.ENSP00000362463,9606.ENSP00000379386,9606.ENSP00000445175	DLD,ALDH2,ACAT1,MDH2,ALDH9A1,FH,ACAT2,GLO1,LDHB,LDHA
SW620	cell&exo	35	hsa04910	Insulin signaling pathway	17	133	0.54	0.00024	9606.ENSP00000215832,9606.ENSP00000216392,9606.ENSP00000216962,9606.ENSP00000256078,9606.ENSP00000265563,9606.ENSP00000272298,9606.ENSP00000290277,9606.ENSP00000302486,9606.ENSP00000304592,9606.ENSP00000326031,9606.ENSP00000341779,9606.ENSP00000346148,9606.ENSP00000358548,9606.ENSP00000365569,9606.ENSP00000369757,9606.ENSP00000376345,9606.ENSP00000378368	MAPK1,PYGL,PYGB,KRAS,PRKAR2A,CALM2,ARAF,MAP2K1,FASN,PPP1CA,PPP1CC,PRKAA1,NRAS,FLOT1,RPS6,GRB2,FLOT2
SW620	cell&exo	36	hsa04611	Platelet activation	16	122	0.55	0.0003	9606.ENSP00000215832,9606.ENSP00000245932,9606.ENSP00000250559,9606.ENSP00000296585,9606.ENSP00000316029,9606.ENSP00000326031,9606.ENSP00000341779,9606.ENSP00000346671,9606.ENSP00000349960,9606.ENSP00000358867,9606.ENSP00000379350,9606.ENSP00000400175,9606.ENSP00000400717,9606.ENSP00000428924,9606.ENSP00000458162,9606.ENSP00000463559	MAPK1,VASP,RAP1B,ITGA2,TLN1,PPP1CA,PPP1CC,FYN,ACTB,GNAI3,ITGB1,RHOA,GNA13,LYN,ACTG1,MYL12B
SW620	cell&exo	37	hsa00030	Pentose phosphate pathway	8	29	0.87	0.00034	9606.ENSP00000252603,9606.ENSP00000270776,9606.ENSP00000321259,9606.ENSP00000370517,9606.ENSP00000377192,9606.ENSP00000378669,9606.ENSP00000391481,9606.ENSP00000405573	PGLS,PGD,TALDO1,PFKP,G6PD,ALDOA,TKT,GPI
SW620	cell&exo	38	hsa04390	Hippo signaling pathway	18	153	0.5	0.00035	9606.ENSP00000248975,9606.ENSP00000261769,9606.ENSP00000264335,9606.ENSP00000268459,9606.ENSP00000304669,9606.ENSP00000306330,9606.ENSP00000324804,9606.ENSP00000325074,9606.ENSP00000326031,9606.ENSP00000341779,9606.ENSP00000344456,9606.ENSP00000345731,9606.ENSP00000349486,9606.ENSP00000349960,9606.ENSP00000361930,9606.ENSP00000376333,9606.ENSP00000379287,9606.ENSP00000458162	YWHAH,CDH1,YWHAE,NKD1,CTNNA1,YWHAG,PPP2R1A,PPP2R2A,PPP1CA,PPP1CC,CTNNB1,DLG1,SCRIB,ACTB,YWHAB,LLGL2,YWHAZ,ACTG1
SW620	cell&exo	39	hsa05160	Hepatitis C	18	156	0.5	0.00042	9606.ENSP00000215832,9606.ENSP00000220849,9606.ENSP00000248975,9606.ENSP00000256078,9606.ENSP00000256383,9606.ENSP00000261693,9606.ENSP00000264335,9606.ENSP00000265734,9606.ENSP00000290277,9606.ENSP00000302486,9606.ENSP00000306330,9606.ENSP00000324804,9606.ENSP00000325074,9606.ENSP00000344456,9606.ENSP00000358548,9606.ENSP00000361930,9606.ENSP00000376345,9606.ENSP00000379287	MAPK1,EIF3E,YWHAH,KRAS,EIF2S1,SCARB1,YWHAE,CDK6,ARAF,MAP2K1,YWHAG,PPP2R1A,PPP2R2A,CTNNB1,NRAS,YWHAB,GRB2,YWHAZ
SW620	cell&exo	40	hsa04540	Gap junction	13	87	0.61	0.00044	9606.ENSP00000078429,9606.ENSP00000215832,9606.ENSP00000248437,9606.ENSP00000256078,9606.ENSP00000281537,9606.ENSP00000301071,9606.ENSP00000302486,9606.ENSP00000339001,9606.ENSP00000341289,9606.ENSP00000358548,9606.ENSP00000358867,9606.ENSP00000376345,9606.ENSP00000378699	GNA11,MAPK1,TUBA4A,KRAS,TJP1,TUBA1A,MAP2K1,TUBB,TUBB4B,NRAS,GNAI3,GRB2,CDK1
SW620	cell&exo	41	hsa00480	Glutathione metabolism	10	53	0.71	0.00057	9606.ENSP00000216951,9606.ENSP00000226299,9606.ENSP00000270776,9606.ENSP00000300738,9606.ENSP00000342026,9606.ENSP00000358727,9606.ENSP00000366156,9606.ENSP00000377192,9606.ENSP00000385746,9606.ENSP00000390265	GSS,LAP3,PGD,RRM1,PRDX6,GSTO1,SRM,G6PD,SMS,IDH1
SW620	cell&exo	42	hsa05211	Renal cell carcinoma	11	66	0.66	0.00066	9606.ENSP00000215832,9606.ENSP00000250559,9606.ENSP00000256078,9606.ENSP00000290277,9606.ENSP00000302486,9606.ENSP00000340944,9606.ENSP00000355518,9606.ENSP00000358548,9606.ENSP00000376345,9606.ENSP00000383118,9606.ENSP00000416293	MAPK1,RAP1B,KRAS,ARAF,MAP2K1,PTPN11,FH,NRAS,GRB2,CDC42,SLC2A1
SW620	cell&exo	43	hsa04962	Vasopressin-regulated water reabsorption	9	44	0.74	0.00073	9606.ENSP00000261890,9606.ENSP00000269321,9606.ENSP00000273047,9606.ENSP00000273130,9606.ENSP00000348965,9606.ENSP00000353444,9606.ENSP00000354791,9606.ENSP00000447053,9606.ENSP00000477310	RAB11A,ARHGDIA,RAB5A,DYNC1LI1,DYNC1H1,RAB5B,DCTN1,RAB5C,DYNLL2
SW620	cell&exo	44	hsa05213	Endometrial cancer	10	57	0.68	0.00091	9606.ENSP00000215832,9606.ENSP00000256078,9606.ENSP00000261769,9606.ENSP00000290277,9606.ENSP00000302486,9606.ENSP00000304669,9606.ENSP00000344456,9606.ENSP00000358548,9606.ENSP00000376345,9606.ENSP00000379975	MAPK1,KRAS,CDH1,ARAF,MAP2K1,CTNNA1,CTNNB1,NRAS,GRB2,ILK
SW620	cell&exo	45	hsa00250	Alanine, aspartate and glutamate metabolism	8	36	0.78	0.001	9606.ENSP00000175506,9606.ENSP00000245206,9606.ENSP00000264220,9606.ENSP00000264705,9606.ENSP00000307188,9606.ENSP00000359539,9606.ENSP00000361471,9606.ENSP00000485525	ASNS,GOT2,PPAT,CAD,ASL,GOT1,ASS1,ADSL
SW620	cell&exo	46	hsa04730	Long-term depression	10	59	0.66	0.0011	9606.ENSP00000078429,9606.ENSP00000215832,9606.ENSP00000256078,9606.ENSP00000290277,9606.ENSP00000302486,9606.ENSP00000324804,9606.ENSP00000358548,9606.ENSP00000358867,9606.ENSP00000400717,9606.ENSP00000428924	GNA11,MAPK1,KRAS,ARAF,MAP2K1,PPP2R1A,NRAS,GNAI3,GNA13,LYN
SW620	cell&exo	47	hsa00230	Purine metabolism	15	127	0.51	0.0012	9606.ENSP00000236959,9606.ENSP00000264220,9606.ENSP00000286621,9606.ENSP00000298556,9606.ENSP00000300738,9606.ENSP00000313490,9606.ENSP00000321584,9606.ENSP00000346921,9606.ENSP00000367615,9606.ENSP00000371253,9606.ENSP00000376886,9606.ENSP00000382595,9606.ENSP00000419628,9606.ENSP00000419851,9606.ENSP00000485525	ATIC,PPAT,ADK,HPRT1,RRM1,PFAS,IMPDH2,AK2,APRT,GART,NME1-NME2,PAICS,NUDT5,GMPS,ADSL
SW620	cell&exo	48	hsa05034	Alcoholism	16	144	0.48	0.0013	9606.ENSP00000215832,9606.ENSP00000244537,9606.ENSP00000254810,9606.ENSP00000256078,9606.ENSP00000272298,9606.ENSP00000290277,9606.ENSP00000302486,9606.ENSP00000308405,9606.ENSP00000326031,9606.ENSP00000332194,9606.ENSP00000341779,9606.ENSP00000358548,9606.ENSP00000358867,9606.ENSP00000376345,9606.ENSP00000423563,9606.ENSP00000481878	MAPK1,HIST1H4F,H3F3B,KRAS,CALM2,ARAF,MAP2K1,H2AFV,PPP1CA,HIST2H2AC,PPP1CC,NRAS,GNAI3,GRB2,H2AFY,GNB1
SW620	cell&exo	49	hsa05206	MicroRNAs in cancer	17	160	0.46	0.0013	9606.ENSP00000215832,9606.ENSP00000256078,9606.ENSP00000260363,9606.ENSP00000265734,9606.ENSP00000290341,9606.ENSP00000302486,9606.ENSP00000356042,9606.ENSP00000358548,9606.ENSP00000365439,9606.ENSP00000370128,9606.ENSP00000371798,9606.ENSP00000376345,9606.ENSP00000384136,9606.ENSP00000400175,9606.ENSP00000410452,9606.ENSP00000446007,9606.ENSP00000478061	MAPK1,KRAS,KIF23,CDK6,IGF2BP1,MAP2K1,EZR,NRAS,HNRNPK,SLC7A1,FSCN1,GRB2,RDX,RHOA,STMN1,VIM,MARCKS
SW620	cell&exo	50	hsa04022	cGMP-PKG signaling pathway	17	162	0.46	0.0015	9606.ENSP00000078429,9606.ENSP00000215832,9606.ENSP00000245932,9606.ENSP00000272298,9606.ENSP00000302486,9606.ENSP00000326031,9606.ENSP00000341779,9606.ENSP00000356790,9606.ENSP00000358867,9606.ENSP00000360671,9606.ENSP00000361635,9606.ENSP00000370808,9606.ENSP00000392043,9606.ENSP00000400175,9606.ENSP00000400717,9606.ENSP00000428845,9606.ENSP00000445306	GNA11,MAPK1,VASP,CALM2,MAP2K1,PPP1CA,PPP1CC,ATP1B1,GNAI3,SLC25A5,VDAC2,SLC25A6,ATP2B1,RHOA,GNA13,VDAC3,ATP1A1
SW620	cell&exo	51	hsa00630	Glyoxylate and dicarboxylate metabolism	7	30	0.8	0.0017	9606.ENSP00000205402,9606.ENSP00000265838,9606.ENSP00000309477,9606.ENSP00000327070,9606.ENSP00000333667,9606.ENSP00000342056,9606.ENSP00000356015	DLD,ACAT1,ACO1,MDH2,SHMT2,CS,ACAT2
SW620	cell&exo	52	hsa04666	Fc gamma R-mediated phagocytosis	12	90	0.56	0.0017	9606.ENSP00000215832,9606.ENSP00000228825,9606.ENSP00000245932,9606.ENSP00000298316,9606.ENSP00000302486,9606.ENSP00000345361,9606.ENSP00000383118,9606.ENSP00000388169,9606.ENSP00000428924,9606.ENSP00000432660,9606.ENSP00000478061,9606.ENSP00000483313	MAPK1,ARPC3,VASP,ARF6,MAP2K1,ARPC5L,CDC42,ARPC4,LYN,CFL1,MARCKS,WASF2
SW620	cell&exo	53	hsa04720	Long-term potentiation	10	64	0.63	0.0017	9606.ENSP00000215832,9606.ENSP00000250559,9606.ENSP00000256078,9606.ENSP00000272298,9606.ENSP00000290277,9606.ENSP00000302486,9606.ENSP00000326031,9606.ENSP00000341779,9606.ENSP00000358548,9606.ENSP00000368884	MAPK1,RAP1B,KRAS,CALM2,ARAF,MAP2K1,PPP1CA,PPP1CC,NRAS,RPS6KA3
SW620	cell&exo	54	hsa05412	Arrhythmogenic right ventricular cardiomyopathy	11	76	0.59	0.0017	9606.ENSP00000070846,9606.ENSP00000200181,9606.ENSP00000296585,9606.ENSP00000304669,9606.ENSP00000344456,9606.ENSP00000349960,9606.ENSP00000357283,9606.ENSP00000369129,9606.ENSP00000379350,9606.ENSP00000386896,9606.ENSP00000458162	PKP2,ITGB4,ITGA2,CTNNA1,CTNNB1,ACTB,LMNA,DSP,ITGB1,ITGA6,ACTG1
SW620	cell&exo	55	hsa04218	Cellular senescence	16	150	0.46	0.0018	9606.ENSP00000215832,9606.ENSP00000256078,9606.ENSP00000256196,9606.ENSP00000265734,9606.ENSP00000272298,9606.ENSP00000302486,9606.ENSP00000326031,9606.ENSP00000341779,9606.ENSP00000358548,9606.ENSP00000360671,9606.ENSP00000361635,9606.ENSP00000370808,9606.ENSP00000378699,9606.ENSP00000379873,9606.ENSP00000428845,9606.ENSP00000431984	MAPK1,KRAS,RRAS2,CDK6,CALM2,MAP2K1,PPP1CA,PPP1CC,NRAS,SLC25A5,VDAC2,SLC25A6,CDK1,HLA-A,VDAC3,CAPN1
SW620	cell&exo	56	hsa04066	HIF-1 signaling pathway	13	106	0.52	0.0019	9606.ENSP00000215832,9606.ENSP00000229239,9606.ENSP00000234590,9606.ENSP00000302486,9606.ENSP00000324105,9606.ENSP00000353224,9606.ENSP00000362413,9606.ENSP00000369757,9606.ENSP00000370517,9606.ENSP00000378669,9606.ENSP00000379386,9606.ENSP00000416293,9606.ENSP00000445175	MAPK1,GAPDH,ENO1,MAP2K1,ENO3,TFRC,PGK1,RPS6,PFKP,ALDOA,LDHB,SLC2A1,LDHA
SW620	cell&exo	57	hsa04961	Endocrine and other factor-regulated calcium reabsorption	9	53	0.66	0.0019	9606.ENSP00000261890,9606.ENSP00000292807,9606.ENSP00000327694,9606.ENSP00000351926,9606.ENSP00000356790,9606.ENSP00000392043,9606.ENSP00000445306,9606.ENSP00000479606,9606.ENSP00000482835	RAB11A,AP2M1,AP2A2,AP2A1,ATP1B1,ATP2B1,ATP1A1,CLTC,AP2B1
SW620	cell&exo	58	hsa03015	mRNA surveillance pathway	12	93	0.54	0.002	9606.ENSP00000269349,9606.ENSP00000306117,9606.ENSP00000313007,9606.ENSP00000324804,9606.ENSP00000325074,9606.ENSP00000326031,9606.ENSP00000326261,9606.ENSP00000341779,9606.ENSP00000353741,9606.ENSP00000379475,9606.ENSP00000398131,9606.ENSP00000470142	EIF4A3,DDX19A,PABPC1,PPP2R1A,PPP2R2A,PPP1CA,SRRM1,PPP1CC,ETF1,DDX39B,GSPT1,UPF1
SW620	cell&exo	59	hsa04015	Rap1 signaling pathway	19	202	0.41	0.002	9606.ENSP00000215832,9606.ENSP00000225655,9606.ENSP00000245932,9606.ENSP00000250559,9606.ENSP00000256078,9606.ENSP00000261769,9606.ENSP00000272298,9606.ENSP00000302486,9606.ENSP00000316029,9606.ENSP00000344456,9606.ENSP00000349960,9606.ENSP00000351209,9606.ENSP00000358548,9606.ENSP00000358867,9606.ENSP00000379350,9606.ENSP00000382004,9606.ENSP00000383118,9606.ENSP00000400175,9606.ENSP00000458162	MAPK1,PFN1,VASP,RAP1B,KRAS,CDH1,CALM2,MAP2K1,TLN1,CTNNB1,ACTB,EPHA2,NRAS,GNAI3,ITGB1,CTNND1,CDC42,RHOA,ACTG1
SW620	cell&exo	60	hsa00051	Fructose and mannose metabolism	7	32	0.77	0.0022	9606.ENSP00000229270,9606.ENSP00000267814,9606.ENSP00000285930,9606.ENSP00000288078,9606.ENSP00000350949,9606.ENSP00000370517,9606.ENSP00000378669	TPI1,SORD,AKR1B1,FUK,GMPPA,PFKP,ALDOA
SW620	cell&exo	61	hsa05169	Epstein-Barr virus infection	18	193	0.4	0.003	9606.ENSP00000157812,9606.ENSP00000219313,9606.ENSP00000261303,9606.ENSP00000261712,9606.ENSP00000265734,9606.ENSP00000300289,9606.ENSP00000309474,9606.ENSP00000310129,9606.ENSP00000310572,9606.ENSP00000348442,9606.ENSP00000379873,9606.ENSP00000386541,9606.ENSP00000391211,9606.ENSP00000401802,9606.ENSP00000428924,9606.ENSP00000446007,9606.ENSP00000478877,9606.ENSP00000481029	PSMC4,PSMD7,PSMC1,PSMD11,CDK6,PDIA3,PSMD1,PSMD2,PSMC5,PSMD12,HLA-A,PSMD14,PSMC2,PSMC6,LYN,VIM,ADRM1,PSMC3
SW620	cell&exo	62	hsa04722	Neurotrophin signaling pathway	13	114	0.49	0.0032	9606.ENSP00000215832,9606.ENSP00000250559,9606.ENSP00000256078,9606.ENSP00000264335,9606.ENSP00000269321,9606.ENSP00000272298,9606.ENSP00000302486,9606.ENSP00000340944,9606.ENSP00000358548,9606.ENSP00000368884,9606.ENSP00000376345,9606.ENSP00000383118,9606.ENSP00000400175	MAPK1,RAP1B,KRAS,YWHAE,ARHGDIA,CALM2,MAP2K1,PTPN11,NRAS,RPS6KA3,GRB2,CDC42,RHOA
SW620	cell&exo	63	hsa05216	Thyroid cancer	7	36	0.72	0.0039	9606.ENSP00000215832,9606.ENSP00000256078,9606.ENSP00000261769,9606.ENSP00000302486,9606.ENSP00000344456,9606.ENSP00000357516,9606.ENSP00000358548	MAPK1,KRAS,CDH1,MAP2K1,CTNNB1,TPM3,NRAS
SW620	cell&exo	64	hsa00330	Arginine and proline metabolism	8	48	0.66	0.004	9606.ENSP00000226299,9606.ENSP00000245206,9606.ENSP00000261733,9606.ENSP00000325548,9606.ENSP00000346827,9606.ENSP00000359539,9606.ENSP00000366156,9606.ENSP00000385746	LAP3,GOT2,ALDH2,CNDP2,ALDH9A1,GOT1,SRM,SMS
SW620	cell&exo	65	hsa04915	Estrogen signaling pathway	14	133	0.46	0.004	9606.ENSP00000001008,9606.ENSP00000215832,9606.ENSP00000256078,9606.ENSP00000272298,9606.ENSP00000299767,9606.ENSP00000302486,9606.ENSP00000335153,9606.ENSP00000358548,9606.ENSP00000358867,9606.ENSP00000360609,9606.ENSP00000364801,9606.ENSP00000373487,9606.ENSP00000376345,9606.ENSP00000432083	FKBP4,MAPK1,KRAS,CALM2,HSP90B1,MAP2K1,HSP90AA1,NRAS,GNAI3,HSP90AB1,HSPA1B,KRT18,GRB2,HSPA8
SW620	cell&exo	66	hsa05110	Vibrio cholerae infection	8	48	0.66	0.004	9606.ENSP00000262461,9606.ENSP00000273398,9606.ENSP00000276390,9606.ENSP00000281537,9606.ENSP00000286091,9606.ENSP00000349960,9606.ENSP00000438262,9606.ENSP00000458162	SLC12A2,ATP6V1A,ATP6V1B2,TJP1,PDIA4,ACTB,TJP2,ACTG1
SW620	cell&exo	67	hsa05165	Human papillomavirus infection	25	325	0.32	0.004	9606.ENSP00000200181,9606.ENSP00000215832,9606.ENSP00000251413,9606.ENSP00000256078,9606.ENSP00000261303,9606.ENSP00000262613,9606.ENSP00000265734,9606.ENSP00000273398,9606.ENSP00000276390,9606.ENSP00000296585,9606.ENSP00000302486,9606.ENSP00000324804,9606.ENSP00000325074,9606.ENSP00000344456,9606.ENSP00000345731,9606.ENSP00000349486,9606.ENSP00000355180,9606.ENSP00000358548,9606.ENSP00000364403,…	ITGB4,MAPK1,TUBG1,KRAS,PSMC1,SLC9A3R1,CDK6,ATP6V1A,ATP6V1B2,ITGA2,MAP2K1,PPP2R1A,PPP2R2A,CTNNB1,DLG1,SCRIB,COL6A1,NRAS,UBR4,LLGL2,GRB2,ITGB1,HLA-A,CDC42,ITGA6
SW620	cell&exo	68	hsa05235	PD-L1 expression and PD-1 checkpoint pathway in cancer	11	88	0.53	0.004	9606.ENSP00000215832,9606.ENSP00000217244,9606.ENSP00000256078,9606.ENSP00000262506,9606.ENSP00000302486,9606.ENSP00000320663,9606.ENSP00000337825,9606.ENSP00000340944,9606.ENSP00000358548,9606.ENSP00000365042,9606.ENSP00000391592	MAPK1,CSNK2A1,KRAS,CSNK2A2,MAP2K1,EML4,LCK,PTPN11,NRAS,CSNK2B,PTPN6
SW620	cell&exo	69	hsa04114	Oocyte meiosis	13	120	0.47	0.0044	9606.ENSP00000215832,9606.ENSP00000248975,9606.ENSP00000264335,9606.ENSP00000272298,9606.ENSP00000302486,9606.ENSP00000306330,9606.ENSP00000324804,9606.ENSP00000326031,9606.ENSP00000341779,9606.ENSP00000361930,9606.ENSP00000368884,9606.ENSP00000378699,9606.ENSP00000379287	MAPK1,YWHAH,YWHAE,CALM2,MAP2K1,YWHAG,PPP2R1A,PPP1CA,PPP1CC,YWHAB,RPS6KA3,CDK1,YWHAZ
SW620	cell&exo	70	hsa04151	PI3K-Akt signaling pathway	26	350	0.31	0.0047	9606.ENSP00000200181,9606.ENSP00000215832,9606.ENSP00000248975,9606.ENSP00000256078,9606.ENSP00000264335,9606.ENSP00000265734,9606.ENSP00000296585,9606.ENSP00000299767,9606.ENSP00000302486,9606.ENSP00000306330,9606.ENSP00000324804,9606.ENSP00000325074,9606.ENSP00000335153,9606.ENSP00000346148,9606.ENSP00000351209,9606.ENSP00000355180,9606.ENSP00000358548,9606.ENSP00000360609,9606.ENSP00000361930,…	ITGB4,MAPK1,YWHAH,KRAS,YWHAE,CDK6,ITGA2,HSP90B1,MAP2K1,YWHAG,PPP2R1A,PPP2R2A,HSP90AA1,PRKAA1,EPHA2,COL6A1,NRAS,HSP90AB1,YWHAB,RPS6,GRB2,YWHAZ,ITGB1,ITGA6,EIF4B,GNB1
SW620	cell&exo	71	hsa04612	Antigen processing and presentation	9	63	0.59	0.0047	9606.ENSP00000247461,9606.ENSP00000300289,9606.ENSP00000302961,9606.ENSP00000324173,9606.ENSP00000335153,9606.ENSP00000360609,9606.ENSP00000364801,9606.ENSP00000379873,9606.ENSP00000432083	CANX,PDIA3,HSPA4,HSPA5,HSP90AA1,HSP90AB1,HSPA1B,HLA-A,HSPA8
SW620	cell&exo	72	hsa01210	2-Oxocarboxylic acid metabolism	5	18	0.88	0.0051	9606.ENSP00000245206,9606.ENSP00000309477,9606.ENSP00000342056,9606.ENSP00000359539,9606.ENSP00000390265	GOT2,ACO1,CS,GOT1,IDH1
SW620	cell&exo	73	hsa04014	Ras signaling pathway	19	226	0.36	0.0057	9606.ENSP00000215832,9606.ENSP00000250559,9606.ENSP00000256078,9606.ENSP00000256196,9606.ENSP00000272298,9606.ENSP00000273047,9606.ENSP00000298316,9606.ENSP00000302486,9606.ENSP00000335029,9606.ENSP00000340944,9606.ENSP00000351015,9606.ENSP00000351209,9606.ENSP00000353444,9606.ENSP00000358548,9606.ENSP00000376345,9606.ENSP00000383118,9606.ENSP00000400175,9606.ENSP00000447053,9606.ENSP00000481878	MAPK1,RAP1B,KRAS,RRAS2,CALM2,RAB5A,ARF6,MAP2K1,RASA3,PTPN11,NF1,EPHA2,RAB5B,NRAS,GRB2,CDC42,RHOA,RAB5C,GNB1
SW620	cell&exo	74	hsa05135	Yersinia infection	13	125	0.45	0.0058	9606.ENSP00000215832,9606.ENSP00000263238,9606.ENSP00000298316,9606.ENSP00000302486,9606.ENSP00000316338,9606.ENSP00000337825,9606.ENSP00000349960,9606.ENSP00000368884,9606.ENSP00000379350,9606.ENSP00000383118,9606.ENSP00000400175,9606.ENSP00000458162,9606.ENSP00000483313	MAPK1,ACTR3,ARF6,MAP2K1,BAIAP2,LCK,ACTB,RPS6KA3,ITGB1,CDC42,RHOA,ACTG1,WASF2
SW620	cell&exo	75	hsa04216	Ferroptosis	7	41	0.67	0.0064	9606.ENSP00000216951,9606.ENSP00000273550,9606.ENSP00000305556,9606.ENSP00000353224,9606.ENSP00000361635,9606.ENSP00000367123,9606.ENSP00000428845	GSS,FTH1,PCBP1,TFRC,VDAC2,SLC3A2,VDAC3
SW620	cell&exo	76	hsa04210	Apoptosis	13	132	0.43	0.0089	9606.ENSP00000215832,9606.ENSP00000248437,9606.ENSP00000256078,9606.ENSP00000256383,9606.ENSP00000301071,9606.ENSP00000302486,9606.ENSP00000349960,9606.ENSP00000355759,9606.ENSP00000357283,9606.ENSP00000358548,9606.ENSP00000361824,9606.ENSP00000431984,9606.ENSP00000458162	MAPK1,TUBA4A,KRAS,EIF2S1,TUBA1A,MAP2K1,ACTB,PARP1,LMNA,NRAS,SPTAN1,CAPN1,ACTG1
SW620	cell&exo	77	hsa04921	Oxytocin signaling pathway	14	149	0.41	0.009	9606.ENSP00000215832,9606.ENSP00000256078,9606.ENSP00000272298,9606.ENSP00000302486,9606.ENSP00000307940,9606.ENSP00000326031,9606.ENSP00000341779,9606.ENSP00000346148,9606.ENSP00000349960,9606.ENSP00000358548,9606.ENSP00000358867,9606.ENSP00000400175,9606.ENSP00000446955,9606.ENSP00000458162	MAPK1,KRAS,CALM2,MAP2K1,EEF2,PPP1CA,PPP1CC,PRKAA1,ACTB,NRAS,GNAI3,RHOA,MYL6,ACTG1
SW620	cell&exo	78	hsa04660	T cell receptor signaling pathway	11	101	0.47	0.0091	9606.ENSP00000215832,9606.ENSP00000256078,9606.ENSP00000302486,9606.ENSP00000337825,9606.ENSP00000345731,9606.ENSP00000346671,9606.ENSP00000358548,9606.ENSP00000376345,9606.ENSP00000383118,9606.ENSP00000391592,9606.ENSP00000400175	MAPK1,KRAS,MAP2K1,LCK,DLG1,FYN,NRAS,GRB2,CDC42,PTPN6,RHOA
SW620	cell&exo	79	hsa04150	mTOR signaling pathway	14	151	0.4	0.0098	9606.ENSP00000215832,9606.ENSP00000256078,9606.ENSP00000261622,9606.ENSP00000273398,9606.ENSP00000276390,9606.ENSP00000302486,9606.ENSP00000346148,9606.ENSP00000358548,9606.ENSP00000367123,9606.ENSP00000368884,9606.ENSP00000369757,9606.ENSP00000376345,9606.ENSP00000388806,9606.ENSP00000400175	MAPK1,KRAS,SLC7A5,ATP6V1A,ATP6V1B2,MAP2K1,PRKAA1,NRAS,SLC3A2,RPS6KA3,RPS6,GRB2,EIF4B,RHOA
SW620	cell&exo	80	hsa04919	Thyroid hormone signaling pathway	12	119	0.44	0.0103	9606.ENSP00000215832,9606.ENSP00000256078,9606.ENSP00000302486,9606.ENSP00000344456,9606.ENSP00000349960,9606.ENSP00000356790,9606.ENSP00000358548,9606.ENSP00000370517,9606.ENSP00000416293,9606.ENSP00000445306,9606.ENSP00000458162,9606.ENSP00000479636	MAPK1,KRAS,MAP2K1,CTNNB1,ACTB,ATP1B1,NRAS,PFKP,SLC2A1,ATP1A1,ACTG1,PLCD3
SW620	cell&exo	81	hsa00640	Propanoate metabolism	6	34	0.68	0.0111	9606.ENSP00000205402,9606.ENSP00000265838,9606.ENSP00000356015,9606.ENSP00000379386,9606.ENSP00000419325,9606.ENSP00000445175	DLD,ACAT1,ACAT2,LDHB,SUCLG2,LDHA
SW620	cell&exo	82	hsa05410	Hypertrophic cardiomyopathy	10	89	0.48	0.0111	9606.ENSP00000200181,9606.ENSP00000296585,9606.ENSP00000345230,9606.ENSP00000346148,9606.ENSP00000349960,9606.ENSP00000357283,9606.ENSP00000357516,9606.ENSP00000379350,9606.ENSP00000386896,9606.ENSP00000458162	ITGB4,ITGA2,TPM4,PRKAA1,ACTB,LMNA,TPM3,ITGB1,ITGA6,ACTG1
SW620	cell&exo	83	hsa03008	Ribosome biogenesis in eukaryotes	9	77	0.5	0.0138	9606.ENSP00000217244,9606.ENSP00000221801,9606.ENSP00000246868,9606.ENSP00000262506,9606.ENSP00000268802,9606.ENSP00000358400,9606.ENSP00000365042,9606.ENSP00000370589,9606.ENSP00000446215	CSNK2A1,FBL,SBDS,CSNK2A2,NOB1,MDN1,CSNK2B,NOP56,RAN
SW620	cell&exo	84	hsa04360	Axon guidance	15	177	0.36	0.0145	9606.ENSP00000215832,9606.ENSP00000256078,9606.ENSP00000309539,9606.ENSP00000340944,9606.ENSP00000346671,9606.ENSP00000351209,9606.ENSP00000358548,9606.ENSP00000358867,9606.ENSP00000379350,9606.ENSP00000379975,9606.ENSP00000383118,9606.ENSP00000400175,9606.ENSP00000420321,9606.ENSP00000432660,9606.ENSP00000463559	MAPK1,KRAS,DPYSL2,PTPN11,FYN,EPHA2,NRAS,GNAI3,ITGB1,ILK,CDC42,RHOA,ROBO1,CFL1,MYL12B
SW620	cell&exo	85	hsa00260	Glycine, serine and threonine metabolism	6	38	0.63	0.0173	9606.ENSP00000205402,9606.ENSP00000333667,9606.ENSP00000358417,9606.ENSP00000359991,9606.ENSP00000365773,9606.ENSP00000378854	DLD,SHMT2,PHGDH,PGAM1,PSAT1,PSPH
SW620	cell&exo	86	hsa05215	Prostate cancer	10	96	0.45	0.0173	9606.ENSP00000215832,9606.ENSP00000256078,9606.ENSP00000290277,9606.ENSP00000299767,9606.ENSP00000302486,9606.ENSP00000335153,9606.ENSP00000344456,9606.ENSP00000358548,9606.ENSP00000360609,9606.ENSP00000376345	MAPK1,KRAS,ARAF,HSP90B1,MAP2K1,HSP90AA1,CTNNB1,NRAS,HSP90AB1,GRB2
SW620	cell&exo	87	hsa05418	Fluid shear stress and atherosclerosis	12	130	0.4	0.0183	9606.ENSP00000272298,9606.ENSP00000299767,9606.ENSP00000335153,9606.ENSP00000344456,9606.ENSP00000346148,9606.ENSP00000349960,9606.ENSP00000354837,9606.ENSP00000358727,9606.ENSP00000360609,9606.ENSP00000361471,9606.ENSP00000400175,9606.ENSP00000458162	CALM2,HSP90B1,HSP90AA1,CTNNB1,PRKAA1,ACTB,ARHGEF2,GSTO1,HSP90AB1,ASS1,RHOA,ACTG1
SW620	cell&exo	88	hsa04371	Apelin signaling pathway	12	131	0.4	0.0192	9606.ENSP00000215832,9606.ENSP00000256078,9606.ENSP00000256196,9606.ENSP00000261769,9606.ENSP00000272298,9606.ENSP00000302486,9606.ENSP00000346148,9606.ENSP00000358548,9606.ENSP00000358867,9606.ENSP00000369757,9606.ENSP00000400717,9606.ENSP00000481878	MAPK1,KRAS,RRAS2,CDH1,CALM2,MAP2K1,PRKAA1,NRAS,GNAI3,RPS6,GNA13,GNB1
SW620	cell&exo	89	hsa05120	Epithelial cell signaling in Helicobacter pylori infection	8	67	0.51	0.0192	9606.ENSP00000260408,9606.ENSP00000273398,9606.ENSP00000276390,9606.ENSP00000281537,9606.ENSP00000340944,9606.ENSP00000357005,9606.ENSP00000383118,9606.ENSP00000428924	ADAM10,ATP6V1A,ATP6V1B2,TJP1,PTPN11,F11R,CDC42,LYN
SW620	cell&exo	90	hsa05223	Non-small cell lung cancer	8	68	0.5	0.0204	9606.ENSP00000215832,9606.ENSP00000256078,9606.ENSP00000265734,9606.ENSP00000290277,9606.ENSP00000302486,9606.ENSP00000320663,9606.ENSP00000358548,9606.ENSP00000376345	MAPK1,KRAS,CDK6,ARAF,MAP2K1,EML4,NRAS,GRB2
SW620	cell&exo	91	hsa04270	Vascular smooth muscle contraction	12	133	0.39	0.0207	9606.ENSP00000078429,9606.ENSP00000215832,9606.ENSP00000216181,9606.ENSP00000272298,9606.ENSP00000290277,9606.ENSP00000302486,9606.ENSP00000326031,9606.ENSP00000341779,9606.ENSP00000353590,9606.ENSP00000400175,9606.ENSP00000400717,9606.ENSP00000446955	GNA11,MAPK1,MYH9,CALM2,ARAF,MAP2K1,PPP1CA,PPP1CC,MYH10,RHOA,GNA13,MYL6
SW620	cell&exo	92	hsa05146	Amoebiasis	10	100	0.43	0.0211	9606.ENSP00000078429,9606.ENSP00000211998,9606.ENSP00000248553,9606.ENSP00000252699,9606.ENSP00000265062,9606.ENSP00000273047,9606.ENSP00000353444,9606.ENSP00000377941,9606.ENSP00000447053,9606.ENSP00000484343	GNA11,VCL,HSPB1,ACTN4,RAB7A,RAB5A,RAB5B,ACTN1,RAB5C,SERPINB6
SW620	cell&exo	93	hsa00380	Tryptophan metabolism	6	41	0.6	0.022	9606.ENSP00000205402,9606.ENSP00000261733,9606.ENSP00000265838,9606.ENSP00000335304,9606.ENSP00000346827,9606.ENSP00000356015	DLD,ALDH2,ACAT1,DLST,ALDH9A1,ACAT2
SW620	cell&exo	94	hsa05219	Bladder cancer	6	41	0.6	0.022	9606.ENSP00000215832,9606.ENSP00000256078,9606.ENSP00000261769,9606.ENSP00000290277,9606.ENSP00000302486,9606.ENSP00000358548	MAPK1,KRAS,CDH1,ARAF,MAP2K1,NRAS
SW620	cell&exo	95	hsa04010	MAPK signaling pathway	20	288	0.28	0.0254	9606.ENSP00000215832,9606.ENSP00000248553,9606.ENSP00000250559,9606.ENSP00000256078,9606.ENSP00000256196,9606.ENSP00000261716,9606.ENSP00000282412,9606.ENSP00000290277,9606.ENSP00000302486,9606.ENSP00000351015,9606.ENSP00000351209,9606.ENSP00000358548,9606.ENSP00000358866,9606.ENSP00000364801,9606.ENSP00000368884,9606.ENSP00000376345,9606.ENSP00000383118,9606.ENSP00000410452,9606.ENSP00000420213,…	MAPK1,HSPB1,RAP1B,KRAS,RRAS2,TAOK1,PPM1B,ARAF,MAP2K1,NF1,EPHA2,NRAS,FLNA,HSPA1B,RPS6KA3,GRB2,CDC42,STMN1,FLNB,HSPA8
SW620	cell&exo	96	hsa04650	Natural killer cell mediated cytotoxicity	11	121	0.39	0.026	9606.ENSP00000215832,9606.ENSP00000256078,9606.ENSP00000290277,9606.ENSP00000302486,9606.ENSP00000337825,9606.ENSP00000340944,9606.ENSP00000346671,9606.ENSP00000358548,9606.ENSP00000376345,9606.ENSP00000379873,9606.ENSP00000391592	MAPK1,KRAS,ARAF,MAP2K1,LCK,PTPN11,FYN,NRAS,GRB2,HLA-A,PTPN6
SW620	cell&exo	97	hsa05214	Glioma	8	72	0.48	0.026	9606.ENSP00000215832,9606.ENSP00000256078,9606.ENSP00000265734,9606.ENSP00000272298,9606.ENSP00000290277,9606.ENSP00000302486,9606.ENSP00000358548,9606.ENSP00000376345	MAPK1,KRAS,CDK6,CALM2,ARAF,MAP2K1,NRAS,GRB2
SW620	cell&exo	98	hsa01523	Antifolate resistance	5	31	0.64	0.0289	9606.ENSP00000236959,9606.ENSP00000260118,9606.ENSP00000333667,9606.ENSP00000366084,9606.ENSP00000371253	ATIC,GGH,SHMT2,ABCC4,GART
SW620	cell&exo	99	hsa04721	Synaptic vesicle cycle	8	74	0.47	0.0291	9606.ENSP00000261205,9606.ENSP00000273398,9606.ENSP00000276390,9606.ENSP00000292807,9606.ENSP00000327694,9606.ENSP00000351926,9606.ENSP00000479606,9606.ENSP00000482835	SYT1,ATP6V1A,ATP6V1B2,AP2M1,AP2A2,AP2A1,CLTC,AP2B1
SW620	cell&exo	100	hsa05220	Chronic myeloid leukemia	8	75	0.46	0.0309	9606.ENSP00000215832,9606.ENSP00000256078,9606.ENSP00000265734,9606.ENSP00000290277,9606.ENSP00000302486,9606.ENSP00000340944,9606.ENSP00000358548,9606.ENSP00000376345	MAPK1,KRAS,CDK6,ARAF,MAP2K1,PTPN11,NRAS,GRB2
SW620	cell&exo	101	hsa00670	One carbon pool by folate	4	20	0.74	0.0316	9606.ENSP00000216605,9606.ENSP00000236959,9606.ENSP00000333667,9606.ENSP00000371253	MTHFD1,ATIC,SHMT2,GART
SW620	cell&exo	102	hsa00280	Valine, leucine and isoleucine degradation	6	46	0.55	0.0328	9606.ENSP00000205402,9606.ENSP00000261733,9606.ENSP00000265838,9606.ENSP00000343657,9606.ENSP00000346827,9606.ENSP00000356015	DLD,ALDH2,ACAT1,MCCC2,ALDH9A1,ACAT2
SW620	cell&exo	103	hsa00520	Amino sugar and nucleotide sugar metabolism	6	46	0.55	0.0328	9606.ENSP00000288078,9606.ENSP00000319501,9606.ENSP00000338703,9606.ENSP00000350949,9606.ENSP00000405573,9606.ENSP00000465930	FUK,UGDH,UGP2,GMPPA,GPI,GALK1
SW620	cell&exo	104	hsa00040	Pentose and glucuronate interconversions	5	33	0.61	0.0342	9606.ENSP00000267814,9606.ENSP00000285930,9606.ENSP00000303356,9606.ENSP00000319501,9606.ENSP00000338703	SORD,AKR1B1,DCXR,UGDH,UGP2
SW620	cell&exo	105	hsa00220	Arginine biosynthesis	4	21	0.71	0.0352	9606.ENSP00000245206,9606.ENSP00000307188,9606.ENSP00000359539,9606.ENSP00000361471	GOT2,ASL,GOT1,ASS1
SW620	cell&exo	106	hsa04914	Progesterone-mediated oocyte maturation	9	94	0.42	0.0352	9606.ENSP00000215832,9606.ENSP00000256078,9606.ENSP00000290277,9606.ENSP00000302486,9606.ENSP00000335153,9606.ENSP00000358867,9606.ENSP00000360609,9606.ENSP00000368884,9606.ENSP00000378699	MAPK1,KRAS,ARAF,MAP2K1,HSP90AA1,GNAI3,HSP90AB1,RPS6KA3,CDK1
SW620	cell&exo	107	hsa01521	EGFR tyrosine kinase inhibitor resistance	8	78	0.45	0.0355	9606.ENSP00000215832,9606.ENSP00000256078,9606.ENSP00000290277,9606.ENSP00000302486,9606.ENSP00000351015,9606.ENSP00000358548,9606.ENSP00000369757,9606.ENSP00000376345	MAPK1,KRAS,ARAF,MAP2K1,NF1,NRAS,RPS6,GRB2
SW620	cell&exo	108	hsa04261	Adrenergic signaling in cardiomyocytes	12	147	0.35	0.0355	9606.ENSP00000215832,9606.ENSP00000272298,9606.ENSP00000324804,9606.ENSP00000325074,9606.ENSP00000326031,9606.ENSP00000341779,9606.ENSP00000345230,9606.ENSP00000356790,9606.ENSP00000357516,9606.ENSP00000358867,9606.ENSP00000392043,9606.ENSP00000445306	MAPK1,CALM2,PPP2R1A,PPP2R2A,PPP1CA,PPP1CC,TPM4,ATP1B1,TPM3,GNAI3,ATP2B1,ATP1A1
SW620	cell&exo	109	hsa05414	Dilated cardiomyopathy	9	95	0.41	0.036	9606.ENSP00000200181,9606.ENSP00000296585,9606.ENSP00000345230,9606.ENSP00000349960,9606.ENSP00000357283,9606.ENSP00000357516,9606.ENSP00000379350,9606.ENSP00000386896,9606.ENSP00000458162	ITGB4,ITGA2,TPM4,ACTB,LMNA,TPM3,ITGB1,ITGA6,ACTG1
SW620	cell&exo	110	hsa04137	Mitophagy - animal	7	63	0.48	0.0364	9606.ENSP00000217244,9606.ENSP00000256078,9606.ENSP00000256196,9606.ENSP00000262506,9606.ENSP00000265062,9606.ENSP00000358548,9606.ENSP00000365042	CSNK2A1,KRAS,RRAS2,CSNK2A2,RAB7A,NRAS,CSNK2B
SW620	cell&exo	111	hsa04071	Sphingolipid signaling pathway	10	116	0.37	0.0435	9606.ENSP00000215832,9606.ENSP00000256078,9606.ENSP00000302486,9606.ENSP00000324804,9606.ENSP00000325074,9606.ENSP00000346671,9606.ENSP00000358548,9606.ENSP00000358867,9606.ENSP00000400175,9606.ENSP00000400717	MAPK1,KRAS,MAP2K1,PPP2R1A,PPP2R2A,FYN,NRAS,GNAI3,RHOA,GNA13
SW620	cell&exo	112	hsa05210	Colorectal cancer	8	82	0.42	0.0438	9606.ENSP00000215832,9606.ENSP00000256078,9606.ENSP00000290277,9606.ENSP00000302486,9606.ENSP00000344456,9606.ENSP00000358548,9606.ENSP00000376345,9606.ENSP00000400175	MAPK1,KRAS,ARAF,MAP2K1,CTNNB1,NRAS,GRB2,RHOA
SW620	cell&exo	113	hsa04664	Fc epsilon RI signaling pathway	7	66	0.46	0.044	9606.ENSP00000215832,9606.ENSP00000256078,9606.ENSP00000302486,9606.ENSP00000346671,9606.ENSP00000358548,9606.ENSP00000376345,9606.ENSP00000428924	MAPK1,KRAS,MAP2K1,FYN,NRAS,GRB2,LYN
SW620	cell&exo	114	hsa05166	Human T-cell leukemia virus 1 infection	15	211	0.29	0.045	9606.ENSP00000215832,9606.ENSP00000247461,9606.ENSP00000256078,9606.ENSP00000302486,9606.ENSP00000316029,9606.ENSP00000337825,9606.ENSP00000345731,9606.ENSP00000358548,9606.ENSP00000360671,9606.ENSP00000361635,9606.ENSP00000370808,9606.ENSP00000379873,9606.ENSP00000416293,9606.ENSP00000428845,9606.ENSP00000446215	MAPK1,CANX,KRAS,MAP2K1,TLN1,LCK,DLG1,NRAS,SLC25A5,VDAC2,SLC25A6,HLA-A,SLC2A1,VDAC3,RAN
SW620	cell&exo	115	hsa04960	Aldosterone-regulated sodium reabsorption	5	37	0.56	0.0467	9606.ENSP00000215832,9606.ENSP00000256078,9606.ENSP00000340989,9606.ENSP00000356790,9606.ENSP00000445306	MAPK1,KRAS,SFN,ATP1B1,ATP1A1
SW620	cell&exo	116	hsa04922	Glucagon signaling pathway	9	101	0.38	0.0476	9606.ENSP00000216392,9606.ENSP00000216962,9606.ENSP00000272298,9606.ENSP00000346148,9606.ENSP00000359991,9606.ENSP00000370517,9606.ENSP00000379386,9606.ENSP00000416293,9606.ENSP00000445175	PYGL,PYGB,CALM2,PRKAA1,PGAM1,PFKP,LDHB,SLC2A1,LDHA
SW620	onlyexo	1	hsa04512	ECM-receptor interaction	8	88	1.23	1.41e-05	9606.ENSP00000260356,9606.ENSP00000261023,9606.ENSP00000265131,9606.ENSP00000295550,9606.ENSP00000300527,9606.ENSP00000346839,9606.ENSP00000399421,9606.ENSP00000452786	THBS1,ITGAV,TNC,COL6A3,COL6A2,FN1,CD36,ITGB3
SW620	onlyexo	2	hsa04144	Endocytosis	11	241	0.93	1.61e-05	9606.ENSP00000244040,9606.ENSP00000262435,9606.ENSP00000263277,9606.ENSP00000263780,9606.ENSP00000267202,9606.ENSP00000294742,9606.ENSP00000354772,9606.ENSP00000380998,9606.ENSP00000383199,9606.ENSP00000432279,9606.ENSP00000469240	RAB22A,SMURF2,EHD2,CHMP2B,VPS37B,ARPC5,MVB12B,CHMP1A,NEDD4L,CHMP1B,CHMP2A
SW620	onlyexo	3	hsa05165	Human papillomavirus infection	9	325	0.72	0.0079	9606.ENSP00000260356,9606.ENSP00000261023,9606.ENSP00000265131,9606.ENSP00000277541,9606.ENSP00000295550,9606.ENSP00000300527,9606.ENSP00000321537,9606.ENSP00000346839,9606.ENSP00000452786	THBS1,ITGAV,TNC,NOTCH1,COL6A3,COL6A2,LLGL1,FN1,ITGB3
SW620	onlyexo	4	hsa04510	Focal adhesion	7	198	0.82	0.0092	9606.ENSP00000260356,9606.ENSP00000261023,9606.ENSP00000265131,9606.ENSP00000295550,9606.ENSP00000300527,9606.ENSP00000346839,9606.ENSP00000452786	THBS1,ITGAV,TNC,COL6A3,COL6A2,FN1,ITGB3
SW620	onlyexo	5	hsa04217	Necroptosis	6	149	0.88	0.0117	9606.ENSP00000263780,9606.ENSP00000332790,9606.ENSP00000362352,9606.ENSP00000380998,9606.ENSP00000432279,9606.ENSP00000469240	CHMP2B,HIST2H2AB,H2AFY2,CHMP1A,CHMP1B,CHMP2A
SW620	onlyexo	6	hsa04151	PI3K-Akt signaling pathway	8	350	0.63	0.0352	9606.ENSP00000260356,9606.ENSP00000261023,9606.ENSP00000265131,9606.ENSP00000295550,9606.ENSP00000300527,9606.ENSP00000346839,9606.ENSP00000359675,9606.ENSP00000452786	THBS1,ITGAV,TNC,COL6A3,COL6A2,FN1,GNG5,ITGB3
SW620	onlyexo	7	hsa05205	Proteoglycans in cancer	6	196	0.76	0.0352	9606.ENSP00000260356,9606.ENSP00000261023,9606.ENSP00000264039,9606.ENSP00000346839,9606.ENSP00000447730,9606.ENSP00000452786	THBS1,ITGAV,GPC1,FN1,CD63,ITGB3
SW620	onlyexo	8	hsa04145	Phagosome	5	142	0.82	0.0465	9606.ENSP00000225275,9606.ENSP00000260356,9606.ENSP00000261023,9606.ENSP00000399421,9606.ENSP00000452786	MPO,THBS1,ITGAV,CD36,ITGB3
