# Supplementary material for: Characterisation of Colorectal Cancer Cell Lines through Proteomic Profiling of Their Extracellular Vesicles
Source: Proteomes. 2023 Jan 11;11(1):3. doi: 10.3390/proteomes11010003 (PMC9844407; doi:10.3390/proteomes11010003)
Supplement: Supplementary file 1 [file proteomes-11-00003-s001.zip › Table S6.xlsx]

## Sheet: Sheet1
uniprotID	Sequence in Protein	Positions in Proteins	Modifications in Proteins	Annotated Sequence	Modifications	Quan Usage	# Missed Cleavages	Theo. MH+ [Da]	sample_HCT116 R1	sample_HCT116 R2	sample_HCT116 R3	sample_HT29 R1	sample_HT29 R2	sample_HT29 R3	sample_SW620 R1	sample_SW620 R2	sample_SW620 R3	Quan Info	HCT116 R1	HCT116 R2	HCT116 R3	HT29 R1	HT29 R2	HT29 R3	SW620 R1	SW620 R2	SW620 R3
A0FGR8-1	R.SSSSLLASPGHISVK.E	[736-750]	A0FGR8-6 1xPhospho [S]; A0FGR8-5 1xPhospho [S]; A0FGR8-1 1xPhospho [S]; A0FGR8-2 1xPhospho [S]	[R].SSSSLLASPGHISVK.[E]	1xPhospho [S]	Used	0	1549.76	63.1	110.8	76.1	129.2	107.1	77.5	88.7	125.1	122.2		High	Peak Found	Peak Found	Peak Found	Peak Found	Peak Found	Peak Found	Peak Found	Peak Found
A0JLT2	K.NRHSPDHPGMGSSQASSSSSLR.-	[223-244]	A0JLT2 1xPhospho [S235]	[K].NRHSPDHPGMGSSQASSSSSLR.[-]	1xPhospho [S13]; 1xOxidation [M10]	Used	1	2377.99		220.3	250	43.9	52.1	52.1		94	187.7		Not Found	Peak Found	High	Peak Found	Peak Found	Peak Found	Not Found	Peak Found	High
A0JNW5-1	K.SGSGEIGSETSDKK.D	[987-1000]	A0JNW5-1 1xPhospho [S]	[K].SGSGEIGSETSDKK.[D]	1xPhospho [S]	Used	1	1461.61	181.1	161.7	104.9	108.2	110	92.4	44.8	49.4	47.4		High	Peak Found	High	Peak Found	Peak Found	Peak Found	High	High	High
A0MZ66	R.KVTAEADSSSPTGILATSESK.S	[485-505]	A0MZ66-4 1xPhospho [T496]; A0MZ66-6 1xPhospho [T466]; A0MZ66-3 1xPhospho [T496]; A0MZ66 1xPhospho [T496]; A0MZ66-5 1xPhospho [T436]; A0MZ66-7 1xPhospho [T84]; A0MZ66-8 1xPhospho [T436]	[R].KVTAEADSSSPTGILATSESK.[S]	1xPhospho [T12]	Used	1	2159.01	133.8	152.7	157.5	79.3	57.5	61.2	88.5	81.6	87.7		High	High	Peak Found	Peak Found	Peak Found	Peak Found	High	Peak Found	Peak Found
A0MZ66	K.VTAEADSSSPTGILATSESK.S	[486-505]	A0MZ66-4 1xPhospho [S/T]; A0MZ66-6 1xPhospho [S/T]; A0MZ66-3 1xPhospho [S/T]; A0MZ66 1xPhospho [S/T]; A0MZ66-5 1xPhospho [S/T]; A0MZ66-7 1xPhospho [S/T]; A0MZ66-8 1xPhospho [S/T]	[K].VTAEADSSSPTGILATSESK.[S]	1xPhospho [S/T]	Used	0	2030.92	120.3	187.6	131.5	91.3	68.1	55.3	88	82.6	75.4		High	High	High	High	High	High	High	High	Peak Found
A1A4S6	R.TPPDTTFPEPTCLSASPPNAPPR.Q	[576-598]	A1A4S6 1xPhospho [S]	[R].TPPDTTFPEPTCLSASPPNAPPR.[Q]	1xCarbamidomethyl [C12]; 1xPhospho [S]	Used	0	2530.13		271.5	239.6	52.9	37.6	52	67.1	83.5	95.8		Not Found	High	High	Peak Found	Peak Found	Peak Found	Peak Found	Peak Found	Peak Found
A1L170	R.ASSPSLIER.N	[221-229]	A1L170-2 1xPhospho [S266]; A1L170 1xPhospho [S223]	[R].ASSPSLIER.[N]	1xPhospho [S3]	Used	0	1039.48	225.7	129.5	143.7		91.3	94.2	99.6	52.8	63.3		High	Peak Found	Peak Found	Not Found	Peak Found	Peak Found	Peak Found	Peak Found	Peak Found
A1L390	K.SSGFGSPR.L	[626-633]	A1L390-2 1xPhospho [S164]; A1L390-3 1xPhospho [S575]; A1L390 1xPhospho [S631]	[K].SSGFGSPR.[L]	1xPhospho [S6]	Used	0	874.345		63	51.9	213.9	186.9	200.9	17.3	97.5	68.7		Not Found	Peak Found	High	High	Peak Found	High	Peak Found	Peak Found	High
A1L390	K.GPLSPFNSR.A	[73-81]	A1L390-3 1xPhospho [S76]; A1L390 1xPhospho [S76]	[K].GPLSPFNSR.[A]	1xPhospho [S4]	Used	0	1054.47	71.3	72.1	68.6	123.7	114.8	143.2	100	118.5	87.9		High	High	Peak Found	High	High	Peak Found	High	Peak Found	High
A1L390	R.SHSVPENMVEPPLSGR.V	[1079-1094]	A1L390-2 1xPhospho [S614]; A1L390-3 1xPhospho [S1025]; A1L390 1xPhospho [S1081]	[R].SHSVPENMVEPPLSGR.[V]	1xPhospho [S3]	Used	0	1815.81	45.8	197.6	152.5	106.6	89.8	44.8		130	132.8		Peak Found	Peak Found	High	Peak Found	Peak Found	Peak Found	Not Found	Peak Found	High
A1L390	R.SPLSPTETFSWPDVR.E	[1037-1051]	A1L390-2 1xPhospho [S570]; A1L390-3 1xPhospho [S981]; A1L390 1xPhospho [S1037]	[R].SPLSPTETFSWPDVR.[E]	1xPhospho [S1]	Used	0	1798.8		123.9		82.8	404.5		204.3		84.4		Not Found	Peak Found	Not Found	Peak Found	High	Not Found	Peak Found	Not Found	Peak Found
A1L390	R.SSSVLSLEGSEK.G	[638-649]	A1L390-2 1xPhospho [S]; A1L390-3 1xPhospho [S]; A1L390 1xPhospho [S]	[R].SSSVLSLEGSEK.[G]	1xPhospho [S]	Used	0	1302.58	18.6	88.9	68.7	100.2	111.2	130.1	114.5	149.8	118		Peak Found	High	Peak Found	High	High	High	Peak Found	High	Peak Found
A1L390	R.DGKSPTVPCLQEEAGEPLGGK.G	[959-979]	A1L390-2 1xPhospho [T/S]; A1L390-3 1xPhospho [T/S]; A1L390 1xPhospho [T/S]	[R].DGKSPTVPCLQEEAGEPLGGK.[G]	1xCarbamidomethyl [C9]; 1xPhospho [T/S]	Used	1	2249.02	117.5	142.4	86		61.5	47.8	122.4	148.5	173.8		Peak Found	Peak Found	Peak Found	Not Found	Peak Found	Peak Found	Peak Found	High	High
A1X283	K.NSGEPLPPKPGPGSPSHPGALDLDGVSR.Q	[278-305]	A1X283 1xPhospho [S]	[K].NSGEPLPPKPGPGSPSHPGALDLDGVSR.[Q]	1xPhospho [S]	Used	0	2815.34	177	302.7	224.2				62.5	64	69.5		High	High	High	Not Found	Not Found	Not Found	Peak Found	Peak Found	Peak Found
A2AJT9-1	R.SPSPNIR.N	[78-84]	A2AJT9-1 1xPhospho [S80]; A2AJT9-3 1xPhospho [S80]; A2AJT9-2 1xPhospho [S80]	[R].SPSPNIR.[N]	1xPhospho [S3]	Used	0	850.382	34.9	49.1	38.1	124	143.7	176.6	103.7	119.4	110.5		Peak Found	Peak Found	Peak Found	High	High	High	High	Peak Found	High
A2AJT9-1	R.RGSEDFETR.S	[190-198]	A2AJT9-1 1xPhospho [S192]; A2AJT9-3 1xPhospho [S192]; A2AJT9-2 1xPhospho [S192]	[R].RGSEDFETR.[S]	1xPhospho [S3]	Used	1	1176.47	72.2	74.1	63	141.7	100	121.4	70.1	125.4	132.2		High	Peak Found	Peak Found	Peak Found	Peak Found	High	Peak Found	High	Peak Found
A2AJT9-1	R.SLSPVPR.N	[15-21]	A2AJT9-1 1xPhospho [S17]; A2AJT9-3 1xPhospho [S17]; A2AJT9-2 1xPhospho [S17]	[R].SLSPVPR.[N]	1xPhospho [S3]	Used	0	835.407		48.1	44.5	134.1	119.9	178.2	104.6	142.2	128.3		Not Found	Peak Found	High	High	High	High	High	High	High
A5YM69	R.YYSPCEEHPAETNQNEGAESGTIR.Q	[182-205]	A5YM69 1xPhospho [S184]	[R].YYSPCEEHPAETNQNEGAESGTIR.[Q]	1xCarbamidomethyl [C5]; 1xPhospho [S3]	Used	0	2819.13	36	16.2	46.2	180	217.6	210.7	55.3	60.2	77.8		Peak Found	Peak Found	Peak Found	High	Peak Found	High	Peak Found	Peak Found	Peak Found
A6ND36-1	R.RQLSAPHITR.G	[647-656]	A6ND36-2 1xPhospho [S402]; A6ND36-1 1xPhospho [S650]	[R].RQLSAPHITR.[G]	1xPhospho [S4]	Used	1	1258.64	161.8	87	150.4	106.5	113.5	91.7	29.4	67.2	92.7		High	High	High	Peak Found	High	High	Peak Found	Peak Found	High
A6ND36-1	K.AKSVDEIAK.I	[354-362]	A6ND36-2 1xPhospho [S108]; A6ND36-1 1xPhospho [S356]	[K].AKSVDEIAK.[I]	1xPhospho [S3]	Used	1	1040.5	102	156.3	81	148.9	121.1	105.2		100.7	84.7		High	High	High	Peak Found	Peak Found	Peak Found	Not Found	High	Peak Found
A6ND36-1	R.QLSAPHITR.G	[648-656]	A6ND36-2 1xPhospho [S402]; A6ND36-1 1xPhospho [S650]	[R].QLSAPHITR.[G]	1xPhospho [S3]	Used	0	1102.54		169.5	141.8	135	125.8	98.2	74.1	62.9	92.8		Not Found	Peak Found	High	Peak Found	High	Peak Found	Peak Found	Peak Found	Peak Found
A6NDB9	R.ERGDESPLGAEGAK.T	[370-383]	A6NDB9 1xPhospho [S375]	[R].ERGDESPLGAEGAK.[T]	1xPhospho [S6]	Used	1	1495.64	352.7	282.9	234.4	29.9							High	High	Peak Found	Peak Found	Not Found	Not Found	Not Found	Not Found	Not Found
A6NFI3	R.GGDAKSPVLQEK.G	[107-118]	A6NFI3 1xPhospho [S112]	[R].GGDAKSPVLQEK.[G]	1xPhospho [S6]	Used	1	1308.62	95.5	97.2	124.2	131.4		140.7	89.9	115.7	105.4		High	High	High	High	Not Found	High	High	Peak Found	High
A6NGE4	R.NNDTIKCVNFYGPR.S	[436-449]	A6NGE4 1xPhospho [T439]	[R].NNDTIKCVNFYGPR.[S]	1xCarbamidomethyl [C7]; 1xDeamidated [N2]; 1xPhospho [T4]	Not Used	1	1778.76										No Quan Values	Not Found	Not Found	Not Found	Not Found	Not Found	High	Not Found	Not Found	Not Found
A6NKD9	R.SLDDLSAPPHHR.S	[246-257]	A6NKD9 1xPhospho [S246]	[R].SLDDLSAPPHHR.[S]	1xPhospho [S1]	Used	0	1424.63	304.2		200.1	183.2	141.5			71			High	Not Found	Peak Found	Peak Found	Peak Found	Not Found	Not Found	Peak Found	Not Found
A6NKT7	K.SALSLSKSPAK.L	[1298-1308]	P0DJD0 1xPhospho [S1289]; Q99666 1xPhospho [S1304]; P0DJD1 1xPhospho [S1297]; O14715 1xPhospho [S1304]; A6NKT7 1xPhospho [S1305]	[K].SALSLSKSPAK.[L]	1xPhospho [S8]	Used	1	1168.6	100.5	92.4	131	68.8	74.8	67.8	102.7	140.4	121.7		High	Peak Found	High	Peak Found	Peak Found	Peak Found	Peak Found	High	High
A6NNE9	R.LPEAAAAKGGPGESEAGAGGER.E	[109-130]	A6NNE9 1xPhospho [S122]	[R].LPEAAAAKGGPGESEAGAGGER.[E]	1xPhospho [S14]	Not Used	1	2061.92										No Quan Values	Not Found	Not Found	Not Found	Not Found	High	Not Found	Not Found	Not Found	Not Found
A6QL64-1	K.FTSLNKSAGVSPQKQSAQK.V	[1242-1260]	A6QL64-1 1xPhospho [S]	[K].FTSLNKSAGVSPQKQSAQK.[V]	2xDeamidated [Q15; Q18]; 1xPhospho [S]	Used	2	2088	463.8		436.2								High	Not Found	High	Not Found	Not Found	Not Found	Not Found	Not Found	Not Found
A7E2V4	R.KQSAGPNSPTGGGGGGGSGGTR.M	[46-67]	A7E2V4-2 1xPhospho [S/T]; A7E2V4-5 1xPhospho [S/T]; A7E2V4 1xPhospho [S/T]; A7E2V4-4 1xPhospho [S/T]; A7E2V4-3 1xPhospho [S/T]	[R].KQSAGPNSPTGGGGGGGSGGTR.[M]	1xPhospho [S/T]	Used	1	1923.83	86	148.2	88.7	83.5	88.9	101.3	101	73.8	128.7		Peak Found	High	High	High	Peak Found	Peak Found	High	High	High
A7KAX9	R.DATNRSPTQIVK.M	[947-958]	A7KAX9-2 1xPhospho [S603]; A7KAX9 1xPhospho [S952]	[R].DATNRSPTQIVK.[M]	1xPhospho [S6]	Used	1	1409.68		77	66.2	135.7	150.6	156	98.5	111	104.9		Not Found	Peak Found	Peak Found	High	Peak Found	Peak Found	High	High	Peak Found
A7KAX9	R.SAKSEESLTSLHAVDGDSK.L	[703-721]	A7KAX9-2 1xPhospho [S/T]; A7KAX9 1xPhospho [S/T]	[R].SAKSEESLTSLHAVDGDSK.[L]	1xPhospho [S/T]	Used	1	2040.91	69.1	46.9	55.2	119.5	173.6	144.7	73.7	104	113.2		Peak Found	High	Peak Found	High	High	High	High	High	High
A7KAX9	K.DAETGSSQCQTPGSTASSEPVSPLQEK.L	[835-861]	A7KAX9-2 1xPhospho [S507]; A7KAX9 1xPhospho [S856]	[K].DAETGSSQCQTPGSTASSEPVSPLQEK.[L]	1xCarbamidomethyl [C9]; 1xPhospho [S22]	Used	0	2858.2		59.7	72.6	141.3	160.9	179.5	102	90.9	93.1		Not Found	High	Peak Found	High	High	Peak Found	Peak Found	Peak Found	Peak Found
A8CG34-1	R.GLNSQSSDDHLNKR.S	[352-365]	A8CG34-2 1xPhospho [S116]; Q96HA1-2 1xPhospho [S116]; A8CG34-1 1xPhospho [S358]; Q96HA1-3 1xPhospho [S116]; Q96HA1-1 1xPhospho [S381]	[R].GLNSQSSDDHLNKR.[S]	1xPhospho [S7]	Used	1	1650.72	706.1		28.3	50.8	69.6	12.6		17.6	15		High	Not Found	Peak Found	Peak Found	Peak Found	Peak Found	Not Found	Peak Found	Peak Found
A8CG34-1	R.SSSMSSLTGAYTSGIPSSSR.N	[368-387]	A8CG34-2 1xPhospho [S126]; A8CG34-1 1xPhospho [S368]	[R].SSSMSSLTGAYTSGIPSSSR.[N]	1xPhospho [S1]	Used	0	2042.87	51.8	136.5	94	120.4	94.2	75.5	60.5	133.2	133.8		Peak Found	High	Peak Found	High	Peak Found	Peak Found	Peak Found	Peak Found	Peak Found
A8MT19	K.SASTLCLPSVGAARPQVK.K	[549-566]	A8MT19 1xPhospho [S551]; Q8IUC4-2 1xPhospho [S503]; Q8IUC4 1xPhospho [S654]	[K].SASTLCLPSVGAARPQVK.[K]	1xCarbamidomethyl [C6]; 1xPhospho [S3]	Used	0	1921.96	88.5	84.6	72.7	234.8	189.7	229.6					Peak Found	Peak Found	Peak Found	High	Peak Found	Peak Found	Not Found	Not Found	Not Found
B4DS77	K.AVGSSDGDWAVSTLKSPK.A	[281-298]	B4DS77-2 2xPhospho [S205; S212]; B4DS77 2xPhospho [S285; S292]	[K].AVGSSDGDWAVSTLKSPK.[A]	2xPhospho [S5; S12]	Used	1	1964.84	174.3	281.9	241				37.9	120.1	44.8		Peak Found	High	Peak Found	Not Found	Not Found	Not Found	Peak Found	Peak Found	Peak Found
B5ME19	K.QPLLLSEDEEDTKR.V	[34-47]	Q99613-2 1xPhospho [S39]; B5ME19 1xPhospho [S39]; Q99613 1xPhospho [S39]	[K].QPLLLSEDEEDTKR.[V]	1xPhospho [S6]	Used	1	1752.81	121.2	121.2	109.2	61.9	73.7	69	99.2	128.6	116		High	High	High	High	High	High	High	High	High
C9JLW8	R.SPPSSSEIFTPAHEENVR.F	[21-38]	C9JLW8 1xPhospho [S21]	[R].SPPSSSEIFTPAHEENVR.[F]	1xPhospho [S1]	Used	0	2063.91	117.8	150.5	110	87.5	83.6	53.4	102.8	94	100.4		High	High	High	High	High	Peak Found	High	Peak Found	High
C9JLW8	R.TSSPRSPPSSSEIFTPAHEENVR.F	[16-38]	C9JLW8 1xPhospho [S/T]	[R].TSSPRSPPSSSEIFTPAHEENVR.[F]	1xPhospho [S/T]	Used	1	2592.17	119.5	109	168.6	58.4	86.8	78	67.6	85.6	126.5		High	High	High	Peak Found	High	High	High	High	High
O00159-1	K.DVESPSWR.S	[405-412]	O00159-1 1xPhospho [S408]; O00159-3 1xPhospho [S389]; O00159-2 1xPhospho [S373]	[K].DVESPSWR.[S]	1xPhospho [S4]	Used	0	1055.42	159.8	124.8	58.5	145.8	148	162.9	25.8	44	30.5		High	High	Peak Found	High	High	Peak Found	Peak Found	Peak Found	High
O00161	K.TTWGDGGENSPCNVVSK.Q	[101-117]	O00161 1xPhospho [S/T]	[K].TTWGDGGENSPCNVVSK.[Q]	1xCarbamidomethyl [C12]; 1xPhospho [S/T]	Used	0	1887.76	85.7	104.7	46.9	162.9	165.5	168.1	30.2	72.7	63.2		High	High	Peak Found	Peak Found	High	Peak Found	Peak Found	Peak Found	Peak Found
O00178	R.SAMDSPVPASMFAPEPSSPGAAR.A	[8-30]	O00178 1xPhospho [S24]	[R].SAMDSPVPASMFAPEPSSPGAAR.[A]	1xPhospho [S17]	Used	0	2340	73.2	160.2	178.4	86	39.9	117.2	87.1	79.2	78.8		Peak Found	Peak Found	Peak Found	High	Peak Found	Peak Found	Peak Found	Peak Found	Peak Found
O00192	R.GASSAGEASEKEPLKLDPSR.K	[913-932]	O00192-2 1xPhospho [S853]; O00192 1xPhospho [S916]	[R].GASSAGEASEKEPLKLDPSR.[K]	1xPhospho [S4]	Used	2	2108.99				426.5	305.8	167.7					Not Found	Not Found	Not Found	High	Peak Found	Peak Found	Not Found	Not Found	Not Found
O00193	K.RSASPDDDLGSSNWEAADLGNEER.K	[14-37]	O00193 1xPhospho [S]	[K].RSASPDDDLGSSNWEAADLGNEER.[K]	1xDeamidated [N13]; 1xPhospho [S]	Not Used	1	2672.07										No Quan Values	Not Found	High	High	Not Found	High	High	Not Found	Not Found	Not Found
O00193	R.SASPDDDLGSSNWEAADLGNEERK.Q	[15-38]	O00193 1xPhospho [S]	[R].SASPDDDLGSSNWEAADLGNEERK.[Q]	1xDeamidated [N12]; 1xPhospho [S]	Not Used	1	2644.07										No Quan Values	High	Not Found	Not Found	Not Found	High	Not Found	Not Found	Not Found	Not Found
O00193	K.RSASPDDDLGSSNWEAADLGNEER.K	[14-37]	O00193 1xPhospho [S]	[K].RSASPDDDLGSSNWEAADLGNEER.[K]	1xPhospho [S]	Used	1	2671.09	83.1	74.5	51.3	95.9	164.3	117.2	121.7	85.6	106.4		High	High	High	High	High	High	High	High	High
O00193	R.SASPDDDLGSSNWEAADLGNEERK.Q	[15-38]	O00193 1xPhospho [S]	[R].SASPDDDLGSSNWEAADLGNEERK.[Q]	1xPhospho [S]	Used	1	2643.08		124.4	59.9	124.6	117.8	92.6	129.5	106	145.3		Not Found	Peak Found	High	High	Peak Found	High	High	High	High
O00193	R.SASPDDDLGSSNWEAADLGNEER.K	[15-37]	O00193 1xPhospho [S]	[R].SASPDDDLGSSNWEAADLGNEER.[K]	1xPhospho [S]	Used	0	2514.99	74.5	112.1	55.2	126.5	89.5	88.8	126.2	112.1	115.1		High	High	High	High	High	High	High	High	High
O00193	K.RSASPDDDLGSSNWEAADLGNEERK.Q	[14-38]	O00193 1xPhospho [S]	[K].RSASPDDDLGSSNWEAADLGNEERK.[Q]	1xPhospho [S]	Used	2	2799.19	66.3	70.9	63.6	78.6	210.4	113.7	100.8	71.9	123.9		Peak Found	Peak Found	High	Peak Found	High	High	Peak Found	High	Peak Found
O00193	R.SASPDDDLGSSNWEAADLGNEER.K	[15-37]	O00193 1xPhospho [S]	[R].SASPDDDLGSSNWEAADLGNEER.[K]	1xDeamidated [N12]; 1xPhospho [S]	Used	0	2515.97			123.8	376.3	159.8		240.1				Not Found	Not Found	Peak Found	High	Peak Found	Not Found	High	Not Found	Not Found
O00204	R.EPRPNSSPSPSPGQASETPHPRPS.-	[342-365]	O00204-2 1xPhospho [S]; O00204 1xPhospho [S]	[R].EPRPNSSPSPSPGQASETPHPRPS.[-]	1xPhospho [S]	Used	0	2576.15				287.4	402.2	210.4					Not Found	Not Found	Not Found	High	High	High	Not Found	Not Found	Not Found
O00257-1	K.SGEVAEGEARSPSHK.K	[281-295]	O00257-1 1xPhospho [S291]	[K].SGEVAEGEARSPSHK.[K]	1xPhospho [S11]	Used	1	1620.7	127.6	92.8	89.6	60.6	32.5	34.8	117.2	183.9	161.1		High	Peak Found	High	Peak Found	Peak Found	Peak Found	High	Peak Found	Peak Found
O00264	K.EGEEPTVYSDEEEPKDESARK.N	[173-193]	O00264-2 1xPhospho [S/Y]; O00264 1xPhospho [S/Y]	[K].EGEEPTVYSDEEEPKDESARK.[N]	1xPhospho [T/Y/S]	Used	2	2504.03	90.2	57.1	63.4	119.4	164.6	117	68.8	98.8	120.6		Peak Found	Peak Found	High	Peak Found	Peak Found	Peak Found	High	Peak Found	High
O00264	K.IVRGDQPAASGDSDDDEPPPLPR.L	[45-67]	O00264-2 1xPhospho [S57]; O00264 1xPhospho [S57]	[K].IVRGDQPAASGDSDDDEPPPLPR.[L]	1xPhospho [S13]	Used	1	2484.1	90.1	16.8	20.2	125.9	273.5	191	84.2	70.2	28.1		High	High	High	High	High	High	High	High	High
O00264	R.GDQPAASGDSDDDEPPPLPR.L	[48-67]	O00264-2 1xPhospho [S]; O00264 1xPhospho [S]	[R].GDQPAASGDSDDDEPPPLPR.[L]	1xPhospho [S]	Used	0	2115.85	138.2	48.7	61	133.4	182.4	127.5	101.6	58.9	48.3		High	High	Peak Found	High	High	High	High	High	Peak Found
O00264	K.EGEEPTVYSDEEEPKDESAR.K	[173-192]	O00264-2 1xPhospho [S/Y/T]; O00264 1xPhospho [S/Y/T]	[K].EGEEPTVYSDEEEPKDESAR.[K]	1xPhospho [S/Y/T]	Used	1	2375.94	77	68.6	63.7	130.7	133.3	117.6	105.8	102.5	100.7		High	High	High	High	High	High	High	High	High
O00264	K.LLKEGEEPTVYSDEEEPKDESAR.K	[170-192]	O00264-2 1xPhospho [S/T/Y]; O00264 1xPhospho [S/T/Y]	[K].LLKEGEEPTVYSDEEEPKDESAR.[K]	1xPhospho [S/T/Y]	Used	2	2730.2	87.9	47.5	86.8	118.7	165.4	115.6	65.3	87.6	125.1		High	High	High	High	High	High	High	High	High
O00264	K.IVRGDQPAASGDSDDDEPPPLPR.L	[45-67]	O00264-2 1xPhospho [S57]; O00264 1xPhospho [S57]	[K].IVRGDQPAASGDSDDDEPPPLPR.[L]	1xDeamidated [Q6]; 1xPhospho [S13]	Used	1	2485.09		24.3			230	336.2	145.9	95.3	68.2		Not Found	Peak Found	Not Found	Not Found	High	High	Peak Found	Peak Found	High
O00267	K.VVSISSEHLEPITPTK.N	[1022-1037]	O00267 1xPhospho [T1034]; O00267-2 1xPhospho [T1030]	[K].VVSISSEHLEPITPTK.[N]	1xPhospho [T13]	Used	0	1816.91	47.2	85.3	62.3	45.5	82.3	49.3	159	212.1	157		Peak Found	Peak Found	Peak Found	Peak Found	Peak Found	Peak Found	Peak Found	High	Peak Found
O00268	R.ARPGGGGPQRPGPPSPR.R	[95-111]	O00268 1xPhospho [S109]	[R].ARPGGGGPQRPGPPSPR.[R]	1xPhospho [S15]	Used	0	1720.84		64.1	108.3	119.8	147.1	133	72.5	116.2	139		Not Found	Peak Found	Peak Found	High	Peak Found	Peak Found	Peak Found	Peak Found	Peak Found
O00273-1	R.SISASKASPPGDLQNPK.R	[308-324]	O00273-1 1xPhospho [S]	[R].SISASKASPPGDLQNPK.[R]	1xPhospho [S]	Used	1	1776.85	156.8	153.1	144.1	73.1	32.7	48.2	70.3	127.2	94.6		High	High	High	Peak Found	High	Peak Found	High	High	Peak Found
O00303	K.TCFSPNRVIGLSSDLQQVGGASAR.I	[255-278]	O00303 1xPhospho [S]	[K].TCFSPNRVIGLSSDLQQVGGASAR.[I]	1xCarbamidomethyl [C2]; 1xPhospho [S]	Used	1	2600.23	42.9	115.7	137.4	29.6	41.8	50.7	310.1	97.2	74.7		High	Peak Found	High	Peak Found	High	Peak Found	Peak Found	High	High
O00308	R.TTPATGEQSPGAR.S	[203-215]	O00308 1xPhospho [S211]; O00308-4 1xPhospho [S211]; O00308-2 1xPhospho [S95]	[R].TTPATGEQSPGAR.[S]	1xPhospho [S9]	Used	0	1352.58	44.3	43.1	48.5	83.2	87	85.6	160.1	186.3	161.9		Peak Found	Peak Found	Peak Found	High	Peak Found	High	High	High	High
O00401	K.VIYDFIEK.T	[254-261]	O00401 1xPhospho [Y256]	[K].VIYDFIEK.[T]	1xPhospho [Y3]	Used	0	1106.52		34.5	59.4	303.3	240.8	210.6		26.6	24.7		Not Found	Peak Found	Peak Found	Peak Found	High	Peak Found	Not Found	Peak Found	Peak Found
O00418	R.LEGVDGGQSPR.A	[10-20]	O00418 1xPhospho [S18]	[R].LEGVDGGQSPR.[A]	1xPhospho [S9]	Used	0	1194.52	122.1	152.7	122.8	89.3	73.2	83.3	87.4	92.9	76.2		Peak Found	High	High	High	High	High	High	High	High
O00418	R.KYESDEDSLGSSGR.V	[467-480]	O00418 1xPhospho [S]	[R].KYESDEDSLGSSGR.[V]	1xPhospho [S]	Used	1	1609.64	136.1	145.6	65.6	112	134.9	106	56.8	67.6	75.5		Peak Found	High	Peak Found	High	High	Peak Found	Peak Found	High	Peak Found
O00429	K.SKPIPIMPASPQKGHAVNLLDVPVPVAR.K	[607-634]	O00429-4 1xPhospho [S579]; O00429 1xPhospho [S616]; O00429-6 1xPhospho [S629]; O00429-8 1xPhospho [S618]; O00429-7 1xPhospho [S413]; O00429-3 1xPhospho [S590]; O00429-5 1xPhospho [S590]; O00429-2 1xPhospho [S605]	[K].SKPIPIMPASPQKGHAVNLLDVPVPVAR.[K]	1xPhospho [S10]; 1xOxidation [M7]	Used	1	3027.62		269.6	189.6		54.7		127.4		258.6		Not Found	Peak Found	Peak Found	Not Found	Peak Found	Not Found	Peak Found	Not Found	High
O00429	K.SKPIPIMPASPQK.G	[607-619]	O00429-4 1xPhospho [S579]; O00429 1xPhospho [S616]; O00429-6 1xPhospho [S629]; O00429-8 1xPhospho [S618]; O00429-7 1xPhospho [S413]; O00429-3 1xPhospho [S590]; O00429-5 1xPhospho [S590]; O00429-2 1xPhospho [S605]	[K].SKPIPIMPASPQK.[G]	1xPhospho [S10]	Used	0	1473.75	95.9	134.9	105.1	55.1	64.1	36.1	122.4	139.2	147.2		Peak Found	High	High	Peak Found	High	Peak Found	High	Peak Found	High
O00429	K.SKPIPIMPASPQKGHAVNLLDVPVPVAR.K	[607-634]	O00429-4 1xPhospho [S579]; O00429 1xPhospho [S616]; O00429-6 1xPhospho [S629]; O00429-8 1xPhospho [S618]; O00429-7 1xPhospho [S413]; O00429-3 1xPhospho [S590]; O00429-5 1xPhospho [S590]; O00429-2 1xPhospho [S605]	[K].SKPIPIMPASPQKGHAVNLLDVPVPVAR.[K]	1xPhospho [S10]	Used	1	3011.63	63.9	144.7	211.2	35.5	25.3	24.5	230.3	71.1	93.5		Peak Found	High	High	Peak Found	Peak Found	Peak Found	Peak Found	High	High
O00443	R.SADAGSFSPTPGQIGGAVK.L	[1546-1564]	O00443 1xPhospho [T1555]	[R].SADAGSFSPTPGQIGGAVK.[L]	1xPhospho [T10]	Not Used	0	1826.83										No Quan Values	Not Found	High	Not Found	Not Found	Not Found	Not Found	Not Found	Not Found	Not Found
O00443	K.VSNLQVSPK.S	[253-261]	O00443 1xPhospho [S259]; O00443-2 1xPhospho [S259]	[K].VSNLQVSPK.[S]	1xPhospho [S7]	Used	0	1051.52		161.3	140.2	83.3	59.4	69.7	132.9	129.9	123.3		Not Found	High	High	High	High	High	High	High	High
O00443	R.SQSLNIR.T	[336-342]	O00443 1xPhospho [S338]; O00443-2 1xPhospho [S338]	[R].SQSLNIR.[T]	1xPhospho [S3]	Used	0	897.419	86.2	69.5	53.9	196.1	141.7	194.7	44.1	61.5	52.1		High	High	Peak Found	High	High	High	Peak Found	High	Peak Found
O00459	R.APPPPSSPPPGGAPDGSEPSPDFPALLVEK.L	[257-286]	O00459 1xPhospho [S]	[R].APPPPSSPPPGGAPDGSEPSPDFPALLVEK.[L]	1xPhospho [S]	Used	0	2987.41	135.3	325.9	263.1			8.7	96.3	22.6	48.1		High	High	High	Not Found	Not Found	Peak Found	High	Peak Found	High
O00499	K.GNKSPSPPDGSPAATPEIR.V	[293-311]	O00499-4 2xPhospho [S267; S]; O00499-3 2xPhospho [S298; S]; O00499-7 2xPhospho [S267; S]; O00499-9 2xPhospho [S267; S]; O00499-11 2xPhospho [S282; S]; O00499-10 2xPhospho [S282; S]; O00499 2xPhospho [S298; S]; O00499-6 2xPhospho [S267; S]; O00499-5 2xPhospho [S298; S]; O00499-8 2xPhospho [S282; S]; O00499-2 2xPhospho [S267; S]	[K].GNKSPSPPDGSPAATPEIR.[V]	2xPhospho [S6; S]	Used	1	2037.87	35.2	48.4	49.1	66.4	126.9	111.4	162.9	142.2	157.5		Peak Found	Peak Found	Peak Found	High	High	High	High	High	High
O00499	K.SPSPPDGSPAATPEIR.V	[296-311]	O00499-4 2xPhospho [S267; S]; O00499-3 2xPhospho [S298; S]; O00499-7 2xPhospho [S267; S]; O00499-9 2xPhospho [S267; S]; O00499-11 2xPhospho [S282; S]; O00499-10 2xPhospho [S282; S]; O00499 2xPhospho [S298; S]; O00499-6 2xPhospho [S267; S]; O00499-5 2xPhospho [S298; S]; O00499-8 2xPhospho [S282; S]; O00499-2 2xPhospho [S267; S]	[K].SPSPPDGSPAATPEIR.[V]	2xPhospho [S/T]	Used	0	1738.71		59.4	93.1	27	90.9	51.2	149.7	178.5	250.1		Not Found	Peak Found	Peak Found	Peak Found	High	Peak Found	High	High	High
O00499	K.GNKSPSPPDGSPAATPEIR.V	[293-311]	O00499-4 1xPhospho [S]; O00499-3 1xPhospho [S]; O00499-7 1xPhospho [S]; O00499-9 1xPhospho [S]; O00499-11 1xPhospho [S]; O00499-10 1xPhospho [S]; O00499 1xPhospho [S]; O00499-6 1xPhospho [S]; O00499-5 1xPhospho [S]; O00499-8 1xPhospho [S]; O00499-2 1xPhospho [S]	[K].GNKSPSPPDGSPAATPEIR.[V]	1xPhospho [S]	Used	1	1957.9	49.1	47.3	48.5	98.8	109.4	108.2	132.5	140.4	165.8		High	High	High	High	High	High	High	High	High
O00499	K.SPSPPDGSPAATPEIR.V	[296-311]	O00499-4 1xPhospho [S]; O00499-3 1xPhospho [S]; O00499-7 1xPhospho [S]; O00499-9 1xPhospho [S]; O00499-11 1xPhospho [S]; O00499-10 1xPhospho [S]; O00499 1xPhospho [S]; O00499-6 1xPhospho [S]; O00499-5 1xPhospho [S]; O00499-8 1xPhospho [S]; O00499-2 1xPhospho [S]	[K].SPSPPDGSPAATPEIR.[V]	1xPhospho [S]	Used	0	1658.74	52.4	63.6	50.2	79.1	75	75.7	166.3	162.4	175.3		High	High	High	High	High	High	High	High	High
O00505	R.NVPQEESLEDSDVDADFK.A	[50-67]	O00505 1xPhospho [S60]	[R].NVPQEESLEDSDVDADFK.[A]	1xPhospho [S11]	Used	0	2116.86	123.3	137.7	70.8	112	123.8	64.1	143.1	69.3	55.9		High	High	High	High	High	Peak Found	High	High	High
O00512	R.AVTPVSQGSNSSSADPK.A	[313-329]	O00512 1xPhospho [T315]	[R].AVTPVSQGSNSSSADPK.[A]	1xPhospho [T3]	Used	0	1711.75		175.2	127.8	80.1	74.7	86	103.2	131.5	121.5		Not Found	Peak Found	Peak Found	Peak Found	Peak Found	Peak Found	Peak Found	Peak Found	High
O00512	R.IPVEGPLSPSR.G	[680-690]	O00512 1xPhospho [S687]	[R].IPVEGPLSPSR.[G]	1xPhospho [S8]	Used	0	1231.61	118.7	139	84.5	74.2	58.4	83.4	129.4	116.5	96		High	Peak Found	Peak Found	Peak Found	Peak Found	Peak Found	Peak Found	High	High
O00515	K.VLASEKTSLSEK.I	[206-217]	O00515 1xPhospho [S213]	[K].VLASEKTSLSEK.[I]	1xPhospho [S8]	Used	1	1371.68	47.3	37.1		248	249	309			9.6		Peak Found	Peak Found	Not Found	Peak Found	High	Peak Found	Not Found	Not Found	Peak Found
O00515	R.HRNLSSTTDDEAPR.L	[34-47]	O00515 1xPhospho [S39]	[R].HRNLSSTTDDEAPR.[L]	1xPhospho [S6]	Used	1	1678.72	127.5		175.6	43.8	78.4	31.4	21.2	99.6	322.6		Peak Found	Not Found	Peak Found	Peak Found	Peak Found	Peak Found	Peak Found	Peak Found	High
O00515	K.GVPEKSPVLEK.S	[172-182]	O00515 1xPhospho [S177]	[K].GVPEKSPVLEK.[S]	1xPhospho [S6]	Used	1	1262.64	20.9	26.1	30.8	153.3	98	111.7	130.3	179.2	149.8		High	High	High	High	High	High	High	High	High
O00515	R.TQESGDQDPQEAQK.A	[482-495]	O00515 1xPhospho [S485]	[R].TQESGDQDPQEAQK.[A]	1xPhospho [S4]	Used	0	1640.64		62.2		420.2	244.3	134.6		18	20.8		Not Found	Peak Found	Not Found	Peak Found	High	Peak Found	Not Found	Peak Found	Peak Found
O00515	R.NLSSTTDDEAPR.L	[36-47]	O00515 1xPhospho [S38]	[R].NLSSTTDDEAPR.[L]	1xPhospho [S3]	Used	0	1385.56	57.5	127.4	69.2	67.4	51	45.8	109.5	180.7	191.6		High	High	Peak Found	High	High	High	High	High	High
O00515	R.SASMKLPDNTVK.L	[392-403]	O00515 1xPhospho [S394]	[R].SASMKLPDNTVK.[L]	1xPhospho [S3]	Used	1	1370.64	20.3	61.5	43.8	332.9	180.1	117.5	36.5	53.8	53.7		High	High	High	High	High	High	Peak Found	High	High
O00515	R.SASMKLPDNTVK.L	[392-403]	O00515 1xPhospho [S]	[R].SASMKLPDNTVK.[L]	1xPhospho [S]; 1xOxidation [M4]	Used	1	1386.63	27.2	80.5	38.5	230.5	178.3	178.1	31.9	62.2	72.9		Peak Found	Peak Found	Peak Found	High	High	High	Peak Found	Peak Found	Peak Found
O00515	K.IPSKEEEADMSSPTQR.T	[345-360]	O00515 1xPhospho [S]	[K].IPSKEEEADMSSPTQR.[T]	1xPhospho [S]; 1xOxidation [M10]	Used	1	1900.8	32.7	76.9	64.2	82.4	111	77.4	111.3	123.1	221		Peak Found	High	High	Peak Found	Peak Found	Peak Found	Peak Found	Peak Found	High
O00515	K.IPSKEEEADMSSPTQR.T	[345-360]	O00515 1xPhospho [S]	[K].IPSKEEEADMSSPTQR.[T]	1xPhospho [S]	Used	1	1884.8	31.5	92.8	102.2	151.3	124.6	76.6	65.6	121.3	133.9		Peak Found	High	High	High	High	High	High	High	High
O00515	K.ALASEKSPTADAKPAPK.R	[266-282]	O00515 1xPhospho [S/T]	[K].ALASEKSPTADAKPAPK.[R]	1xPhospho [S/T]	Used	1	1761.88	55.2	29.9	51.9	146.1	192.2	186	53.7	91.4	93.6		High	High	High	High	High	High	High	High	High
O00515	R.NSLSPVQATQKPLVSK.K	[120-135]	O00515 1xPhospho [S/T]	[R].NSLSPVQATQKPLVSK.[K]	1xPhospho [S/T]	Used	0	1776.93	134.1			227.1		126.3	126.9	149.3	136.4		High	Not Found	Not Found	Peak Found	Not Found	Peak Found	High	Peak Found	Peak Found
O00559	R.KLSGDQITLPTTVDYSSVPK.Q	[34-53]	O00559 1xPhospho [S36]; O00559-2 1xPhospho [S36]	[R].KLSGDQITLPTTVDYSSVPK.[Q]	1xPhospho [S3]	Used	1	2229.11	105.5	139.6	139	88.9	87.7	88.2	77.7	86.3	87		High	High	High	High	High	High	High	High	Peak Found
O00567	K.FSKEEPVSSGPEEAVGK.S	[562-578]	O00567 1xPhospho [S570]	[K].FSKEEPVSSGPEEAVGK.[S]	1xPhospho [S9]	Used	1	1856.83	119.9	84.3	98.4	27.2	58.7	43.4	151.9	159.5	156.7		High	Peak Found	High	Peak Found	Peak Found	Peak Found	Peak Found	Peak Found	High
O00567	R.KFSKEEPVSSGPEEAVGK.S	[561-578]	O00567 1xPhospho [S]	[R].KFSKEEPVSSGPEEAVGK.[S]	1xPhospho [S]	Used	2	1984.93	182.6	92.4	85.1	35.8	44.1	63.5	58.9	104.3	233.4		High	Peak Found	Peak Found	Peak Found	Peak Found	Peak Found	Peak Found	High	High
O00567	K.EEPVSSGPEEAVGK.S	[565-578]	O00567 1xPhospho [S]	[K].EEPVSSGPEEAVGK.[S]	1xPhospho [S]	Used	0	1494.64	285.2	106.9	51.7	36.9	21.2	39	179.7	179.4			High	Peak Found	Peak Found	Peak Found	Peak Found	Peak Found	Peak Found	High	Not Found
O00567	R.LAALALASSENSSSTPEECEEMSEKPK.K	[454-480]	O00567 1xPhospho [T468]	[R].LAALALASSENSSSTPEECEEMSEKPK.[K]	1xCarbamidomethyl [C19]; 1xPhospho [T15]	Used	0	2975.29								464.6	435.4		Not Found	Not Found	Not Found	Not Found	Not Found	Not Found	Not Found	Peak Found	High
O00567	R.LAALALASSENSSSTPEECEEMSEKPK.K	[454-480]	O00567 1xPhospho [S]	[R].LAALALASSENSSSTPEECEEMSEKPK.[K]	1xCarbamidomethyl [C19]; 1xPhospho [S]; 1xOxidation [M22]	Used	0	2991.28								419.7	480.3		Not Found	Not Found	Not Found	Not Found	Not Found	Not Found	Not Found	High	High
O00567	R.LAALALASSENSSSTPEECEEMSEKPK.K	[454-480]	O00567 1xPhospho [S466]	[R].LAALALASSENSSSTPEECEEMSEKPK.[K]	1xCarbamidomethyl [C19]; 1xDeamidated [N11]; 1xPhospho [S13]	Used	0	2976.27		331.5	223.3				128.2	217			Not Found	High	Peak Found	Not Found	Not Found	Not Found	Peak Found	Peak Found	Not Found
O00712-1	R.SLSSPPSSK.R	[262-270]	O00712-1 1xPhospho [S264]; O00712-6 1xPhospho [S12]; O00712-4 1xPhospho [S315]; O00712-5 1xPhospho [S264]	[R].SLSSPPSSK.[R]	1xPhospho [S3]	Used	0	969.429	126.2	69.3	53.1	153.2	141.6	177.4	61	71.2	46.9		Peak Found	Peak Found	Peak Found	High	Peak Found	Peak Found	Peak Found	Peak Found	Peak Found
O00712-1	K.KPEKPLFSSASPQDSSPR.L	[318-335]	O00712-1 1xPhospho [S328]; O00712-6 1xPhospho [S76]; O00712-4 1xPhospho [S379]; O00712-5 1xPhospho [S328]	[K].KPEKPLFSSASPQDSSPR.[L]	1xPhospho [S11]	Used	0	2037.96		30.6		244.9	373	251.5					Not Found	Peak Found	Not Found	Peak Found	High	Peak Found	Not Found	Not Found	Not Found
O00750	K.KLSPPPLPPR.A	[153-162]	O00750 1xPhospho [S155]	[K].KLSPPPLPPR.[A]	1xPhospho [S3]	Used	1	1181.64	30.3	49.2	48	180.8	105.8	221.7	88.8	21.7	153.8		Peak Found	Peak Found	Peak Found	High	High	High	Peak Found	High	High
O00767	K.EKGSTLDLSDLEAEK.L	[195-209]	O00767 1xPhospho [S198]	[K].EKGSTLDLSDLEAEK.[L]	1xPhospho [S4]	Not Used	1	1714.78										No Quan Values	High	Not Found	Not Found	Not Found	Not Found	Not Found	Not Found	Not Found	Not Found
O14497	R.SHHAPMSPGSSGGGGQPLAR.T	[357-376]	O14497 1xPhospho [S]; O14497-2 1xPhospho [S]	[R].SHHAPMSPGSSGGGGQPLAR.[T]	1xPhospho [S]; 1xOxidation [M6]	Used	0	1983.85	91.3	118	114.6	45.6	103.5	57.2	34.8	115.5	219.5		High	High	Peak Found	Peak Found	Peak Found	Peak Found	Peak Found	High	High
O14497	R.GPSPSPVGSPASVAQSR.S	[694-710]	O14497 1xPhospho [S]; O14497-3 1xPhospho [S]; O14497-2 1xPhospho [S]	[R].GPSPSPVGSPASVAQSR.[S]	1xPhospho [S]	Used	0	1660.77	69.8	98	79.7	91.7	71	97.2	149.5	132.2	111		High	High	High	High	High	High	High	High	High
O14497	R.SHHAPMSPGSSGGGGQPLAR.T	[357-376]	O14497 1xPhospho [S]; O14497-2 1xPhospho [S]	[R].SHHAPMSPGSSGGGGQPLAR.[T]	1xPhospho [S]	Used	0	1967.85		91.4	138	109.7	112.9	57	65.8	135.1	190		Not Found	Peak Found	High	Peak Found	High	High	High	High	High
O14497	R.NPQMPQYSSPQPGSALSPR.Q	[756-774]	O14497 1xPhospho [S]; O14497-3 1xPhospho [S]; O14497-2 1xPhospho [S]	[R].NPQMPQYSSPQPGSALSPR.[Q]	1xPhospho [S]	Used	0	2121.94		101.5	75.7	102.2	99.3	68.5	116.7	147.7	188.3		Not Found	Peak Found	Peak Found	High	High	Peak Found	Peak Found	Peak Found	High
O14523	K.EAGLSQSHDDLSNATATPSVR.K	[656-676]	O14523 1xPhospho [S]; O14523-2 1xPhospho [S]	[K].EAGLSQSHDDLSNATATPSVR.[K]	1xPhospho [S]	Used	0	2235.99	126.7	128.2	109.6	149.4	87.9	102.5	56.3	68.1	71.2		Peak Found	Peak Found	Peak Found	High	High	Peak Found	Peak Found	Peak Found	Peak Found
O14545	R.ALPSLNTGSSSPR.G	[317-329]	O14545 1xPhospho [S]	[R].ALPSLNTGSSSPR.[G]	1xPhospho [S]	Used	0	1366.64	104.4	134.9	112.6	43.8	42.1	50.5	135	144.9	131.9		High	High	High	Peak Found	High	High	High	High	High
O14545	R.LDSQPQETSPELPRR.R	[407-421]	O14545 1xPhospho [S]	[R].LDSQPQETSPELPRR.[R]	1xPhospho [S]	Used	1	1832.85	123.2	96	107	42.7	74.7	76.1	114.6	125.4	140.3		Peak Found	High	High	Peak Found	High	Peak Found	High	Peak Found	High
O14545	R.LDSQPQETSPELPR.R	[407-420]	O14545 1xPhospho [S/T]	[R].LDSQPQETSPELPR.[R]	1xPhospho [S/T]	Used	0	1676.75	90.7	144.7	117.6	56.8	37.2	51.4	164.3	120	117.5		High	High	High	High	High	Peak Found	High	High	High
O14617-5	R.NTETSKSPEKDVPMVEK.K	[823-839]	O14617-1 1xPhospho [S]; O14617-3 1xPhospho [S]; O14617-2 1xPhospho [S]; O14617-5 1xPhospho [S]	[R].NTETSKSPEKDVPMVEK.[K]	1xPhospho [T/S]	Used	2	1998.91	167.6	125.5	158.7	77.7	39.2	36.7	69	103.7	122		High	Peak Found	High	Peak Found	Peak Found	Peak Found	Peak Found	Peak Found	Peak Found
O14617-5	K.HRPSEADEEELAR.R	[655-667]	O14617-1 1xPhospho [S658]; O14617-3 1xPhospho [S489]; O14617-2 1xPhospho [S567]; O14617-4 1xPhospho [S658]; O14617-5 1xPhospho [S658]	[K].HRPSEADEEELAR.[R]	1xPhospho [S4]	Used	0	1618.69	235	124.7	148.7	51.5			37.5	125.7	176.9		High	Peak Found	Peak Found	Peak Found	Not Found	Not Found	Peak Found	Peak Found	Peak Found
O14617-5	K.TEAQGEEDDAEGQDQDKKSPKPK.K	[913-935]	O14617-2 1xPhospho [S828]; O14617-5 1xPhospho [S931]	[K].TEAQGEEDDAEGQDQDKKSPKPK.[K]	1xPhospho [S19]	Used	2	2610.12	212.4	119.1	98.1	100.3	90.2	52.9	57.9	70.3	98.8		High	Peak Found	Peak Found	Peak Found	Peak Found	Peak Found	Peak Found	Peak Found	High
O14639-1	R.TLSPTPSAEGYQDVR.D	[429-443]	O14639-3 1xPhospho [T/S]; O14639-4 1xPhospho [T/S]; O14639-5 1xPhospho [T/S]; O14639-6 1xPhospho [T/S]; O14639-2 1xPhospho [T/S]; O14639-1 1xPhospho [T/S]	[R].TLSPTPSAEGYQDVR.[D]	1xPhospho [T/Y/S]	Used	0	1700.75	84	113.3	83.2	175.7	174	197.5	28	28	16.3		High	High	High	High	High	High	Peak Found	Peak Found	Peak Found
O14639-1	R.GVSMPNMLEPK.I	[704-714]	O14639-3 1xPhospho [S355]; O14639-4 1xPhospho [S329]; O14639-5 1xPhospho [S383]; O14639-6 1xPhospho [S676]; O14639-2 1xPhospho [S646]; O14639-1 1xPhospho [S706]	[R].GVSMPNMLEPK.[I]	1xPhospho [S3]; 1xOxidation [M]	Used	0	1298.55	17.3	158.5	100	149.4	156.5	166.5	32.3	67.1	52.5		Peak Found	Peak Found	Peak Found	Peak Found	High	High	Peak Found	Peak Found	Peak Found
O14639-1	K.TASLPGYGR.N	[653-661]	O14639-3 1xPhospho [S304]; O14639-4 1xPhospho [S278]; O14639-5 1xPhospho [S332]; O14639-6 1xPhospho [S625]; O14639-2 1xPhospho [S595]; O14639-1 1xPhospho [S655]	[K].TASLPGYGR.[N]	1xPhospho [S3]	Used	0	1001.45	67.9	80	73.2	183.9	155	212.2	41.7	48.8	37.5		High	Peak Found	High	High	High	High	High	High	High
O14639-1	R.GVSMPNMLEPK.I	[704-714]	O14639-3 1xPhospho [S355]; O14639-4 1xPhospho [S329]; O14639-5 1xPhospho [S383]; O14639-6 1xPhospho [S676]; O14639-2 1xPhospho [S646]; O14639-1 1xPhospho [S706]	[R].GVSMPNMLEPK.[I]	1xPhospho [S3]	Used	0	1282.56	28.6	158.2	128.1	215.2	158.3	89.3	33.1	42.5	46.9		Peak Found	Peak Found	High	Peak Found	High	High	Peak Found	Peak Found	Peak Found
O14639-1	K.SSEDIIK.F	[540-546]	O14639-3 1xPhospho [S189]; O14639-4 1xPhospho [S163]; O14639-5 1xPhospho [S217]; O14639-6 1xPhospho [S510]; O14639-2 1xPhospho [S480]; O14639-1 1xPhospho [S540]	[K].SSEDIIK.[F]	1xPhospho [S1]	Used	0	871.381	43.2	31.4	32.1	291.6	179.9	271.9	49.9				Peak Found	Peak Found	Peak Found	High	Peak Found	High	Peak Found	Not Found	Not Found
O14639-1	R.STSQGSINSPVYSR.H	[450-463]	O14639-3 1xPhospho [S]; O14639-4 1xPhospho [S]; O14639-5 1xPhospho [S]; O14639-6 1xPhospho [S]; O14639-2 1xPhospho [S]; O14639-1 1xPhospho [S]	[R].STSQGSINSPVYSR.[H]	1xPhospho [S]	Used	0	1562.68	80.8	79.1	61.5	169.8	161.4	250.7	28.9	36.2	31.5		High	High	High	High	High	High	High	High	High
O14639-1	R.RSSGREEDDEELLR.R	[585-598]	O14639-3 1xPhospho [S]; O14639-4 1xPhospho [S]; O14639-5 1xPhospho [S]; O14639-6 1xPhospho [S]; O14639-2 1xPhospho [S]; O14639-1 1xPhospho [S]	[R].RSSGREEDDEELLR.[R]	1xPhospho [S]	Used	2	1770.77	255.4	121	159.9	104	120.4	68.6	18	25	27.7		High	High	High	Peak Found	Peak Found	Peak Found	Peak Found	Peak Found	High
O14639-1	R.SSGREEDDEELLR.R	[586-598]	O14639-3 1xPhospho [S]; O14639-4 1xPhospho [S]; O14639-5 1xPhospho [S]; O14639-6 1xPhospho [S]; O14639-2 1xPhospho [S]; O14639-1 1xPhospho [S]	[R].SSGREEDDEELLR.[R]	1xPhospho [S]	Used	1	1614.66	133.3	117.7	66.2	198.3	189.7	143.1	12.7	32.8	6.1		Peak Found	Peak Found	High	High	High	Peak Found	Peak Found	Peak Found	Peak Found
O14646	R.ASSSGPRSPLDQR.S	[1670-1682]	O14646-2 1xPhospho [S]; O14646 1xPhospho [S]	[R].ASSSGPRSPLDQR.[S]	1xPhospho [S]	Used	1	1437.65	95.7	98.9	104.1	83.8	90.2	87.6	77	134.9	127.7		High	High	High	Peak Found	High	High	High	High	High
O14654	R.SSPLGQNDNSEYVPMLPGK.F	[817-835]	O14654 1xPhospho [S]	[R].SSPLGQNDNSEYVPMLPGK.[F]	1xPhospho [S]; 1xOxidation [M15]	Not Used	0	2128.93										No Quan Values	Not Found	High	Not Found	High	High	Not Found	Not Found	Not Found	Not Found
O14683	K.HSQTDLVSR.L	[13-21]	O14683 1xPhospho [S14]	[K].HSQTDLVSR.[L]	1xPhospho [S2]	Used	0	1122.49	31.5	40	41.7	190.5	297.8	298.4					Peak Found	Peak Found	Peak Found	Peak Found	High	High	Not Found	Not Found	Not Found
O14683	K.KHSQTDLVSR.L	[12-21]	O14683 1xPhospho [S/T]	[K].KHSQTDLVSR.[L]	1xPhospho [S/T]	Used	1	1250.59	67.3	50.1	55.8	181.7	289.7	255.5					High	High	High	High	High	High	Not Found	Not Found	Not Found
O14686-1	R.HQPSTPDPFLKPR.C	[2236-2248]	O14686-1 1xPhospho [T2240]; O14686-3 1xPhospho [T2243]	[R].HQPSTPDPFLKPR.[C]	1xPhospho [T5]	Used	0	1599.77		55.6	75.2	164.1	175.4	120	52.1	121.6	136.1		Not Found	Peak Found	Peak Found	Peak Found	High	Peak Found	Peak Found	Peak Found	Peak Found
O14686-1	K.ASEPLLSPPPFGESR.K	[2268-2282]	O14686-1 1xPhospho [S2274]; O14686-3 1xPhospho [S2277]	[K].ASEPLLSPPPFGESR.[K]	1xPhospho [S7]	Used	0	1663.77	59.2	101.5		88.9	87.4	71.4	137.6	193.3	160.8		High	High	Not Found	High	Peak Found	Peak Found	High	High	Peak Found
O14686-1	K.GLEGKSPDTGPDWLK.Q	[4844-4858]	O14686-1 1xPhospho [S4849]; O14686-3 1xPhospho [S4852]	[K].GLEGKSPDTGPDWLK.[Q]	1xPhospho [S6]	Used	1	1679.77	101.5	29.5		87.3	44.2	38.4	184.8	247	167.3		Peak Found	Peak Found	Not Found	Peak Found	Peak Found	Peak Found	Peak Found	High	Peak Found
O14686-1	K.LEGPVSPDVEPGKEETEESK.K	[1666-1685]	O14686-1 1xPhospho [S1671]; O14686-3 1xPhospho [S1671]	[K].LEGPVSPDVEPGKEETEESK.[K]	1xPhospho [S6]	Used	1	2235.99	119.6	72.5	64.5	95.2	100.6	46.5	170.2	140.8	90.1		Peak Found	Peak Found	Peak Found	Peak Found	Peak Found	Peak Found	High	Peak Found	Peak Found
O14686-1	R.SGITSPVEKR.E	[2636-2645]	O14686-1 1xPhospho [S2640]; O14686-3 1xPhospho [S2643]	[R].SGITSPVEKR.[E]	1xPhospho [S5]	Used	1	1153.56	26.9	28.8	23.7	73.3	79.5	72	172.9	216.3	206.5		Peak Found	Peak Found	Peak Found	High	High	Peak Found	High	High	High
O14686-1	R.ALSPVIPLIPR.A	[4736-4746]	O14686-1 1xPhospho [S4738]; O14686-3 1xPhospho [S4741]	[R].ALSPVIPLIPR.[A]	1xPhospho [S3]	Used	0	1255.72	1.6	37.2	37.2	93.3	78	91.2	193.2	203.4	164.9		Peak Found	High	High	Peak Found	High	High	High	High	High
O14737	R.KVMDSDEDDDY.-	[115-125]	O14737 1xPhospho [S119]	[R].KVMDSDEDDDY.[-]	1xPhospho [S5]; 1xOxidation [M3]	Used	1	1427.46		70.8	64	103.7	76.7	97.2	135.3	150	202.2		Not Found	Peak Found	Peak Found	Peak Found	Peak Found	Peak Found	Peak Found	High	High
O14745	-.MSADAAAGAPLPR.L	[1-13]	O14745 1xPhospho [S2]; 1xMet-loss+Acetyl [N-Term]	[-].MSADAAAGAPLPR.[L]	1xPhospho [S2]; 1xMet-loss+Acetyl [N-Term]	Used	0	1218.55		90.5	72.7	170.7	165.8	210.2	74	57.7	58.4		Not Found	Peak Found	Peak Found	Peak Found	Peak Found	High	Peak Found	Peak Found	Peak Found
O14745	R.EALAEAALESPRPALVR.S	[271-287]	O14745 1xPhospho [S280]; O14745-2 1xPhospho [S124]	[R].EALAEAALESPRPALVR.[S]	1xPhospho [S10]	Used	0	1872.96	90.8	86	87.5	158.8	141.8	122	43.3	93.9	75.9		Peak Found	High	Peak Found	High	High	High	High	High	High
O14745	R.SASSDTSEELNSQDSPPK.Q	[288-305]	O14745 1xPhospho [S]; O14745-2 1xPhospho [S]	[R].SASSDTSEELNSQDSPPK.[Q]	1xPhospho [S]	Used	0	1958.79	71	80.8	44.4	221.8	165.1	156.9	55.9	54.9	49.2		High	High	High	High	High	High	High	Peak Found	Peak Found
O14757	K.HIQSNLDFSPVNSASSEENVK.Y	[293-313]	O14757-2 1xPhospho [S]; O14757 1xPhospho [S]; O14757-3 1xPhospho [S]	[K].HIQSNLDFSPVNSASSEENVK.[Y]	1xPhospho [S]	Used	0	2382.06	43.1	27.7	20.4	101.4	138.6	133	99.5	182.1	154.3		Peak Found	Peak Found	Peak Found	Peak Found	High	Peak Found	High	Peak Found	Peak Found
O14795	R.AISPTSSSR.Y	[252-260]	O14795-2 1xPhospho [S254]; O14795 1xPhospho [S254]	[R].AISPTSSSR.[Y]	1xPhospho [S3]	Used	0	985.435	69.7	151.5	71.9	130.7	135.3	115		153	72.9		Peak Found	High	Peak Found	Peak Found	High	Peak Found	Not Found	High	Peak Found
O14827	R.KLSLTSPLNSK.I	[744-754]	O14827 1xPhospho [T/S]	[R].KLSLTSPLNSK.[I]	1xPhospho [T/S]	Used	1	1267.67					334.5	276.1		122.1	167.3		Not Found	Not Found	Not Found	Not Found	High	High	Not Found	Peak Found	Peak Found
O14828	R.KLSPTEPK.N	[74-81]	O14828 1xPhospho [S76]; O14828-2 1xPhospho [S50]	[R].KLSPTEPK.[N]	1xPhospho [S3]	Used	1	979.486	128.4	136.4	124.5	78.9	60.4	68.7	87.9	117.5	97.3		High	High	High	High	Peak Found	High	High	High	High
O14867	R.ISESPEPGQR.T	[442-451]	O14867 1xPhospho [S445]	[R].ISESPEPGQR.[T]	1xPhospho [S4]	Used	0	1179.5	60.7	68.6	53.6	165.2	159.1	168.9	70.3	78.6	74.9		Peak Found	Peak Found	Peak Found	High	Peak Found	High	Peak Found	High	Peak Found
O14874	R.STSATDTHHVEMAR.E	[31-44]	O14874-3 1xPhospho [T32]; O14874 1xPhospho [T32]; O14874-2 1xPhospho [T32]	[R].STSATDTHHVEMAR.[E]	1xPhospho [T2]; 1xOxidation [M12]	Used	0	1638.66	141.3	171.7	137.4	62.7	99.1	85.2	41.5	75.1	86.1		Peak Found	High	High	Peak Found	Peak Found	Peak Found	Peak Found	Peak Found	Peak Found
O14874	R.STSATDTHHVEMAR.E	[31-44]	O14874-3 1xPhospho [T/S]; O14874 1xPhospho [T/S]; O14874-2 1xPhospho [T/S]	[R].STSATDTHHVEMAR.[E]	1xPhospho [T/S]	Used	0	1622.66	126.9	151.5	217.7	61.5	122.8	48.8	33	61.1	76.7		High	High	High	High	High	Peak Found	Peak Found	Peak Found	High
O14896	R.SFDSGSVR.L	[413-420]	O14896-2 1xPhospho [S318]; O14896 1xPhospho [S413]	[R].SFDSGSVR.[L]	1xPhospho [S1]	Used	0	934.367	553.4			346.6							High	Not Found	Not Found	Peak Found	Not Found	Not Found	Not Found	Not Found	Not Found
O14908-1	R.SAGGRPGSGPQLGTGR.G	[225-240]	O14908-2 1xPhospho [S135]; O14908-1 1xPhospho [S232]	[R].SAGGRPGSGPQLGTGR.[G]	1xPhospho [S8]	Used	0	1534.71	71.6	82.6	71.9	134.3	196.6	180.9	40.9	60.3	60.8		Peak Found	Peak Found	Peak Found	High	High	High	Peak Found	Peak Found	Peak Found
O14929	R.LISPYKK.K	[359-365]	O14929 1xPhospho [S361]; O14929-2 1xPhospho [S276]	[R].LISPYKK.[K]	1xPhospho [S3]	Used	1	928.49	4.7	121.7	101.8	53.7	43.4	44.8	161.9	199.8	168.2		Peak Found	High	Peak Found	Peak Found	Peak Found	Peak Found	High	Peak Found	Peak Found
O14936-4	R.TQSSSCEDLPSTTQPK.G	[573-588]	O14936-5 1xPhospho [S191]; O14936-4 1xPhospho [S576]; O14936-3 1xPhospho [S570]	[R].TQSSSCEDLPSTTQPK.[G]	1xCarbamidomethyl [C6]; 1xPhospho [S4]	Used	0	1845.76		130.1	104.6	92.5	114.6	115.3	110.9	111.2	120.9		Not Found	High	High	High	Peak Found	Peak Found	Peak Found	Peak Found	Peak Found
O14974	K.ISPKEEER.K	[421-428]	O14974 1xPhospho [S422]; O14974-2 1xPhospho [S422]; O14974-3 1xPhospho [S422]; O14974-4 1xPhospho [S422]; O14974-5 1xPhospho [S335]	[K].ISPKEEER.[K]	1xPhospho [S2]	Used	1	1067.48	116.8	114.4	78.4	110	97.3	107.9	91.6	104	79.7		Peak Found	Peak Found	Peak Found	High	High	High	Peak Found	High	Peak Found
O15013	K.SDLSSSSGSLSLSHGSSSLEHR.S	[1279-1300]	O15013-6 1xPhospho [S1281]; O15013-4 1xPhospho [S1253]; O15013-7 1xPhospho [S1219]; O15013 1xPhospho [S1282]; O15013-5 1xPhospho [S1257]	[K].SDLSSSSGSLSLSHGSSSLEHR.[S]	1xPhospho [S4]	Used	0	2297	900										High	Not Found	Not Found	Not Found	Not Found	Not Found	Not Found	Not Found	Not Found
O15014	R.TNSMGSATGPLPGTK.V	[465-479]	O15014 1xPhospho [T/S]	[R].TNSMGSATGPLPGTK.[V]	1xPhospho [T/S]	Not Used	0	1498.66										No Quan Values	Peak Found	Peak Found	Peak Found	High	Peak Found	Peak Found	High	High	Peak Found
O15014	R.LVEPHSPSPSSK.F	[571-582]	O15014 2xPhospho [S576; S578]	[R].LVEPHSPSPSSK.[F]	2xPhospho [S6; S8]	Used	0	1424.59		114.6	152.8	102.5	133.9	82.8	93	105.7	114.7		Not Found	Peak Found	Peak Found	High	High	Peak Found	Peak Found	High	High
O15014	R.LVEPHSPSPSSK.F	[571-582]	O15014 1xPhospho [S576]	[R].LVEPHSPSPSSK.[F]	1xPhospho [S6]	Used	0	1344.62	92.3	92.2	88.5	108	116.4	118.6	66.9	110.4	106.6		High	High	High	High	High	High	High	High	High
O15014	R.TNSMGSATGPLPGTK.V	[465-479]	O15014 1xPhospho [S/T]	[R].TNSMGSATGPLPGTK.[V]	1xPhospho [S/T]; 1xOxidation [M4]	Used	0	1514.66		160.3	94.3	94.3	86.7	118.3	82.2	111.6	152.3		Not Found	High	High	Peak Found	Peak Found	High	High	High	High
O15014	K.APSLTDLVK.S	[1053-1061]	O15014 1xPhospho [S/T]	[K].APSLTDLVK.[S]	1xPhospho [S/T]	Used	0	1023.51		53.9	40.3	173.2	139.8	155.6	126.1	106.1	105.1		Not Found	Peak Found	Peak Found	High	Peak Found	Peak Found	Peak Found	High	High
O15027-1	K.QIDSSPVGGETDETTVSQNYR.G	[387-407]	O15027-3 1xPhospho [S390]; O15027-2 1xPhospho [S390]; O15027-5 1xPhospho [S390]; O15027-4 1xPhospho [S390]; O15027-1 1xPhospho [S390]	[K].QIDSSPVGGETDETTVSQNYR.[G]	1xDeamidated [Q1]; 1xPhospho [S4]	Not Used	0	2363.99										No Quan Values	Not Found	High	Not Found	Not Found	Not Found	Not Found	Not Found	Not Found	Not Found
O15027-1	K.FANLTPSR.T	[1872-1879]	O15027-3 1xPhospho [T1876]; O15027-2 1xPhospho [T1876]; O15027-5 1xPhospho [T1876]; O15027-4 1xPhospho [T1876]; O15027-1 1xPhospho [T1876]	[K].FANLTPSR.[T]	1xPhospho [T5]	Used	0	985.45		132.7	82.3	108.5	90.1	93.2	96.9	161.2	135.1		Not Found	Peak Found	Peak Found	Peak Found	Peak Found	Peak Found	Peak Found	High	High
O15027-1	R.SSLSSHSHQSQIYR.S	[1190-1203]	O15027-3 1xPhospho [S1196]; O15027-2 1xPhospho [S1196]; O15027-5 1xPhospho [S1196]; O15027-4 1xPhospho [S1196]; O15027-1 1xPhospho [S1196]	[R].SSLSSHSHQSQIYR.[S]	1xPhospho [S7]	Used	0	1696.74		119.5	111.4		287.4	148	63.6	72.1	98		Not Found	Peak Found	Peak Found	Not Found	High	Peak Found	Peak Found	Peak Found	Peak Found
O15027-1	R.RSSLSSHSHQSQIYR.S	[1189-1203]	O15027-3 1xPhospho [S1191]; O15027-2 1xPhospho [S1191]; O15027-5 1xPhospho [S1191]; O15027-4 1xPhospho [S1191]; O15027-1 1xPhospho [S1191]	[R].RSSLSSHSHQSQIYR.[S]	1xPhospho [S3]	Used	1	1852.85	900										High	Not Found	Not Found	Not Found	Not Found	Not Found	Not Found	Not Found	Not Found
O15027-1	R.LLPSAPQTLPDGPLASPAR.V	[1771-1789]	O15027-3 1xPhospho [S1786]; O15027-2 1xPhospho [S1786]; O15027-5 1xPhospho [S1786]; O15027-4 1xPhospho [S1786]; O15027-1 1xPhospho [S1786]	[R].LLPSAPQTLPDGPLASPAR.[V]	1xPhospho [S16]	Used	0	1981.02	59.3	85.6	54.3	121.3	72.1	83.9	113.4	164.3	145.8		Peak Found	Peak Found	Peak Found	Peak Found	Peak Found	Peak Found	Peak Found	Peak Found	High
O15027-1	R.AQQELVPPQQQASPPQLPK.A	[879-897]	O15027-3 1xPhospho [S891]; O15027-2 1xPhospho [S891]; O15027-5 1xPhospho [S891]; O15027-4 1xPhospho [S891]; O15027-1 1xPhospho [S891]	[R].AQQELVPPQQQASPPQLPK.[A]	1xPhospho [S13]	Used	0	2164.08	57	97.4	85.1	150.5	34.4	92.1	127.9	123.2	132.4		High	High	High	High	High	High	High	High	High
O15027-1	R.SLHSAHSLASR.R	[1178-1188]	O15027-3 1xPhospho [S]; O15027-2 1xPhospho [S]; O15027-5 1xPhospho [S]; O15027-4 1xPhospho [S]; O15027-1 1xPhospho [S]	[R].SLHSAHSLASR.[R]	1xPhospho [S]	Used	0	1245.57	79.7	30	42.9	263	176.9	135.2	55.1	66.1	51.2		Peak Found	Peak Found	Peak Found	High	High	High	High	High	High
O15027-1	R.ADSGPTQPPLSLSPAPETK.R	[1893-1911]	O15027-3 1xPhospho [S/T]; O15027-2 1xPhospho [S/T]; O15027-5 1xPhospho [S/T]; O15027-4 1xPhospho [S/T]; O15027-1 1xPhospho [S/T]	[R].ADSGPTQPPLSLSPAPETK.[R]	1xPhospho [S/T]	Used	0	1972.93	63	92.1	61.1	116.9	95.4	105.3	124.2	125	117.1		High	High	High	High	High	High	High	High	High
O15027-1	K.QIDSSPVGGETDETTVSQNYR.G	[387-407]	O15027-3 1xPhospho [S]; O15027-2 1xPhospho [S]; O15027-5 1xPhospho [S]; O15027-4 1xPhospho [S]; O15027-1 1xPhospho [S]	[K].QIDSSPVGGETDETTVSQNYR.[G]	1xPhospho [S/T]	Used	0	2363		87.1	77.6	117.9	126.4	102	147.7	131.3	110		Not Found	High	Peak Found	High	High	Peak Found	Peak Found	High	Peak Found
O15047	R.SGSPAPETTNESVPFAQHSSLDSR.I	[468-491]	O15047 1xPhospho [S]	[R].SGSPAPETTNESVPFAQHSSLDSR.[I]	1xPhospho [S]	Used	0	2581.12	103	148.4	130.1	71.3	53.5	43.1	125.4	104.8	120.4		High	Peak Found	High	Peak Found	Peak Found	Peak Found	High	High	High
O15056	K.SASDASISSGTHGQYSILQTAR.L	[1122-1143]	O15056 1xPhospho [S1124]; O15056-3 1xPhospho [S1124]; O15056-2 1xPhospho [S1079]	[K].SASDASISSGTHGQYSILQTAR.[L]	1xPhospho [S3]	Used	0	2317.05	128.3	27.8		134.8	21.9		316.9	23.7	246.5		Peak Found	Peak Found	Not Found	Peak Found	Peak Found	Not Found	Peak Found	Peak Found	High
O15067	R.SPNRDFLTHVSAR.E	[569-581]	O15067 1xPhospho [S569]	[R].SPNRDFLTHVSAR.[E]	1xPhospho [S1]	Used	1	1579.74	161.5			30.6			190.8	239.9	277.3		High	Not Found	Not Found	Peak Found	Not Found	Not Found	Peak Found	High	Peak Found
O15068	R.ALEQSQSLPLPAPTSTSPSR.G	[959-978]	O15068-5 1xPhospho [T783]; O15068 1xPhospho [T972]; O15068-9 1xPhospho [T942]; O15068-8 1xPhospho [T948]; O15068-3 1xPhospho [T946]; O15068-2 1xPhospho [T975]; O15068-4 1xPhospho [T940]; O15068-6 1xPhospho [T942]; O15068-10 1xPhospho [T940]	[R].ALEQSQSLPLPAPTSTSPSR.[G]	1xPhospho [T14]	Used	0	2147.04	81.2	78.5	57.6	90.1	88.3	85.5	143.8	124.6	150.3		Peak Found	High	Peak Found	Peak Found	Peak Found	Peak Found	Peak Found	High	Peak Found
O15068	R.RGSENSSSEGGALR.R	[587-600]	O15068-5 1xPhospho [S400]; O15068 1xPhospho [S589]; O15068-9 1xPhospho [S559]; O15068-8 1xPhospho [S565]; O15068-3 1xPhospho [S563]; O15068-2 1xPhospho [S592]; O15068-4 1xPhospho [S557]; O15068-6 1xPhospho [S559]; O15068-10 1xPhospho [S557]	[R].RGSENSSSEGGALR.[R]	1xPhospho [S3]	Used	1	1486.63	84.8	122	82.2		85.9	102.6	102.5	170.4	149.5		High	Peak Found	Peak Found	Not Found	Peak Found	Peak Found	Peak Found	Peak Found	Peak Found
O15085-1	R.TRNSGIWESPELDR.N	[1292-1305]	O15085-1 1xPhospho [T1292]; O15085-2 1xPhospho [T1332]	[R].TRNSGIWESPELDR.[N]	1xPhospho [T1]	Used	1	1739.77	117.9	166.8	68.5	116.7	106.5	87.1	53.1	93.1	90.4		High	Peak Found	Peak Found	High	Peak Found	Peak Found	Peak Found	Peak Found	Peak Found
O15085-1	K.SLGGESSGGTTPVGSFHTEAAR.W	[1452-1473]	O15085-1 1xPhospho [T]; O15085-2 1xPhospho [T]	[K].SLGGESSGGTTPVGSFHTEAAR.[W]	1xPhospho [T]	Used	0	2184.96	137	105	144.9	60.7	77.4	76.4	107	87	104.5		High	Peak Found	Peak Found	Peak Found	Peak Found	High	Peak Found	Peak Found	High
O15085-1	R.SRSDVDMDAAAEATR.L	[633-647]	O15085-1 1xPhospho [S635]; O15085-2 1xPhospho [S675]	[R].SRSDVDMDAAAEATR.[L]	1xPhospho [S3]	Used	1	1674.68	110.3	187.5	142.6	115.3	82.6	62.4		95.5	103.8		Peak Found	High	Peak Found	Peak Found	Peak Found	Peak Found	Not Found	Peak Found	Peak Found
O15085-1	K.SSSQSTFHIPLSPVEVKPGNVR.N	[545-566]	O15085-1 1xPhospho [S556]; O15085-2 1xPhospho [S596]	[K].SSSQSTFHIPLSPVEVKPGNVR.[N]	1xPhospho [S12]	Used	0	2446.21		211.1	172.4	83.5	67.7	44.4	92.6	101.6	126.6		Not Found	Peak Found	Peak Found	Peak Found	High	Peak Found	High	Peak Found	High
O15131	-.MASPGKDNYR.M	[1-10]	O15131 1xPhospho [S3]; 1xMet-loss+Acetyl [N-Term]	[-].MASPGKDNYR.[M]	1xPhospho [S3]; 1xMet-loss+Acetyl [N-Term]	Used	1	1129.47	75.6	99	111.3	89.8	65.2	76	129.5	137.2	116.3		Peak Found	High	High	Peak Found	High	High	High	Peak Found	Peak Found
O15143	K.ASSEGGTAAGAGLDSLHK.N	[309-326]	O15143 1xPhospho [T315]	[K].ASSEGGTAAGAGLDSLHK.[N]	1xPhospho [T7]	Used	0	1708.75		113.3	60	283.2	249.9	193.6					Not Found	Peak Found	Peak Found	High	Peak Found	Peak Found	Not Found	Not Found	Not Found
O15143	K.KASSEGGTAAGAGLDSLHK.N	[308-326]	O15143 1xPhospho [S/T]	[K].KASSEGGTAAGAGLDSLHK.[N]	1xPhospho [S/T]	Used	1	1836.85	112.7	59.9	29.2	212.1	276.1	187.8	3.8	8.4	10		High	Peak Found	High	High	High	High	Peak Found	Peak Found	Peak Found
O15155	K.SLSIEIGHEVK.T	[48-58]	O15155-2 1xPhospho [S50]; O15155 1xPhospho [S50]	[K].SLSIEIGHEVK.[T]	1xPhospho [S3]	Used	0	1291.63	145.5	207.5	52.4	178.1	161.4	106.4	8.5	19.3	21		High	High	High	High	High	High	Peak Found	Peak Found	Peak Found
O15164	R.NESEDNKFSDDSDDDFVQPR.K	[1017-1036]	O15164-2 1xPhospho [S991]; O15164 1xPhospho [S1025]	[R].NESEDNKFSDDSDDDFVQPR.[K]	1xPhospho [S9]	Used	1	2438.93		194.3	179.5		208.7		202.7		114.8		Not Found	High	Peak Found	Not Found	Peak Found	Not Found	Peak Found	Not Found	Peak Found
O15164	K.SEWLDPSQKSPLHVGETR.K	[802-819]	O15164-2 1xPhospho [S777]; O15164 1xPhospho [S811]	[K].SEWLDPSQKSPLHVGETR.[K]	1xPhospho [S10]	Used	1	2146	54.4	75.7		168	61.4	114.8	110.7	165	150.1		Peak Found	Peak Found	Not Found	High	Peak Found	High	High	High	High
O15169	R.RSDLDLGYEPEGSASPTPPYLK.W	[63-84]	O15169 1xPhospho [Y/S]; O15169-2 1xPhospho [Y/S]	[R].RSDLDLGYEPEGSASPTPPYLK.[W]	1xPhospho [Y/S]	Used	1	2472.13		62.1	86.7	175.5	168.1	155.2	80.6	86.5	85.2		Not Found	High	High	High	Peak Found	Peak Found	Peak Found	Peak Found	Peak Found
O15169	R.TGSESPKVCSDQSSGSGTGK.G	[213-232]	O15169 1xPhospho [T213]; O15169-2 1xPhospho [T213]	[R].TGSESPKVCSDQSSGSGTGK.[G]	1xCarbamidomethyl [C9]; 1xPhospho [T1]	Used	1	2035.83		47.3		183.6	213.6	241.3	33.3	91.4	89.4		Not Found	Peak Found	Not Found	Peak Found	Peak Found	Peak Found	Peak Found	Peak Found	High
O15173	R.LLKPGEEPSEYTDEEDTKDHNKQD.-	[200-223]	O15173-2 1xPhospho [T/Y/S]; O15173 1xPhospho [T/Y/S]	[R].LLKPGEEPSEYTDEEDTKDHNKQD.[-]	1xPhospho [T/Y/S]	Used	2	2897.24	173.2	48.4	138.9	122.8	204.1	116.6	6.8	34.1	55.1		High	High	High	High	High	High	High	High	High
O15173	R.RGLGAGAGAGEESPATSLPR.M	[78-97]	O15173-2 1xPhospho [S114]; O15173 1xPhospho [S90]	[R].RGLGAGAGAGEESPATSLPR.[M]	1xPhospho [S13]	Used	1	1933.91	180.9			210.3	230.6	278.2					Peak Found	Not Found	Not Found	High	High	Peak Found	Not Found	Not Found	Not Found
O15173	R.GLGAGAGAGEESPATSLPR.M	[79-97]	O15173-2 1xPhospho [S114]; O15173 1xPhospho [S90]	[R].GLGAGAGAGEESPATSLPR.[M]	1xPhospho [S12]	Used	0	1777.81	44.2	67.9	61.6	158	226.8	235.4	41.9	37.1	27.1		High	High	Peak Found	High	High	High	Peak Found	Peak Found	Peak Found
O15231-3	R.RSSTSGDTEEEEEEEVVPFSSDEQK.R	[151-175]	O15231-5 1xPhospho [T23]; O15231-1 1xPhospho [T158]; O15231-2 1xPhospho [T18]; O15231-4 1xPhospho [T158]; O15231-7 1xPhospho [T158]; O15231-6 1xPhospho [T158]; O15231-3 1xPhospho [T158]; O15231-8 1xPhospho [T158]	[R].RSSTSGDTEEEEEEEVVPFSSDEQK.[R]	1xPhospho [T8]	Used	1	2910.17	118.3	168.7	159.8	141.5	169.4	142.4					Peak Found	Peak Found	High	Peak Found	High	Peak Found	Not Found	Not Found	Not Found
O15231-3	R.QSSPSGSEQLVR.R	[452-463]	O15231-5 1xPhospho [S232]; O15231-1 1xPhospho [S453]; O15231-2 1xPhospho [S216]; O15231-4 1xPhospho [S394]; O15231-7 1xPhospho [S424]; O15231-6 1xPhospho [S485]; O15231-9 1xPhospho [S91]; O15231-3 1xPhospho [S454]; O15231-8 1xPhospho [S456]	[R].QSSPSGSEQLVR.[R]	1xPhospho [S3]	Used	0	1354.6	193.3	176.7	166.1	122.8	119.7	106.6		7.7	7.1		Peak Found	High	High	High	High	Peak Found	Not Found	Peak Found	Peak Found
O15231-3	R.GGQGDPAVPAQQPADPSTPER.Q	[431-451]	O15231-5 1xPhospho [S225]; O15231-1 1xPhospho [S446]; O15231-2 1xPhospho [S209]; O15231-4 1xPhospho [S387]; O15231-7 1xPhospho [S417]; O15231-6 1xPhospho [S478]; O15231-9 1xPhospho [S84]; O15231-3 1xPhospho [S447]; O15231-8 1xPhospho [S449]	[R].GGQGDPAVPAQQPADPSTPER.[Q]	1xPhospho [S17]	Used	0	2154.95		173.9	160.4	189.5	173	203.2					Not Found	Peak Found	Peak Found	Peak Found	High	Peak Found	Not Found	Not Found	Not Found
O15231-3	R.GGQGDPAVPTQQPADPSTPEQQNSPSGSEQFVR.R	[497-529]	O15231-5 1xPhospho [S291]; O15231-1 1xPhospho [S512]; O15231-2 1xPhospho [S275]; O15231-4 1xPhospho [S453]; O15231-7 1xPhospho [S483]; O15231-6 1xPhospho [S544]; O15231-9 1xPhospho [S150]; O15231-3 1xPhospho [S513]; O15231-8 1xPhospho [S515]	[R].GGQGDPAVPTQQPADPSTPEQQNSPSGSEQFVR.[R]	1xPhospho [S17]	Used	0	3473.52	162.5	347	252.7		137.8						Peak Found	High	Peak Found	Not Found	Peak Found	Not Found	Not Found	Not Found	Not Found
O15231-3	K.STGSPTQETQAPFIAK.R	[203-218]	O15231-2 1xPhospho [S/T]; O15231-3 1xPhospho [S/T]	[K].STGSPTQETQAPFIAK.[R]	1xPhospho [S/T]	Used	0	1742.8	165.7	218.6	203.4	106.5	83.4	122.3					High	High	High	Peak Found	Peak Found	High	Not Found	Not Found	Not Found
O15231-3	R.RESCGSSVLTDFEGK.D	[464-478]	O15231-5 1xPhospho [S]; O15231-1 1xPhospho [S]; O15231-2 1xPhospho [S]; O15231-4 1xPhospho [S]; O15231-7 1xPhospho [S]; O15231-6 1xPhospho [S]; O15231-9 1xPhospho [S]; O15231-3 1xPhospho [S]; O15231-8 1xPhospho [S]	[R].RESCGSSVLTDFEGK.[D]	1xCarbamidomethyl [C4]; 1xPhospho [S]	Used	1	1751.73	276.9	228.8	113.5	159.2	28.6	93					High	Peak Found	High	Peak Found	Peak Found	Peak Found	Not Found	Not Found	Not Found
O15234	K.STVTGERQSGDGQESTEPVENK.V	[140-161]	O15234 1xPhospho [T/S]	[K].STVTGERQSGDGQESTEPVENK.[V]	1xPhospho [T/S]	Used	1	2415.03	63.5	74.4	77.3	98.9	143.3	117.3	100.9	111.2	113.2		High	High	High	High	High	High	High	High	High
O15234	K.SEANDAVNSSTKEEKGEEKPDTK.S	[117-139]	O15234 1xPhospho [S/T]	[K].SEANDAVNSSTKEEKGEEKPDTK.[S]	1xPhospho [T/S]	Used	2	2573.13	86.8	45.9	68.9	72.9	157.7	111.1	137.7	79	139.8		High	Peak Found	Peak Found	High	High	High	High	Peak Found	Peak Found
O15234	R.YGSPPQRDPNWNGER.L	[263-277]	O15234 1xPhospho [S265]	[R].YGSPPQRDPNWNGER.[L]	1xPhospho [S3]	Used	1	1852.78	72.8	78.4	65.9	109.7	120.1	119.1	91.9	114	128.1		High	High	High	High	High	Peak Found	High	Peak Found	High
O15234	R.YGSPPQR.D	[263-269]	O15234 1xPhospho [S265]	[R].YGSPPQR.[D]	1xPhospho [S3]	Used	0	884.366	87.6	96.4	73		111.5	124.2	137.1	147.5	122.8		Peak Found	Peak Found	High	Not Found	Peak Found	Peak Found	Peak Found	Peak Found	High
O15234	R.YGSPPQRDPNWNGER.L	[263-277]	O15234 1xPhospho [S265]	[R].YGSPPQRDPNWNGER.[L]	1xDeamidated [N12]; 1xPhospho [S3]	Used	1	1853.76		100.7	74.6	121.8	145.2	138.4	80.5	124.7	114		Not Found	High	Peak Found	Peak Found	High	Peak Found	High	Peak Found	Peak Found
O15258	K.VDPSLMEDSDDGPSLPTK.Q	[87-104]	O15258 1xPhospho [S90]	[K].VDPSLMEDSDDGPSLPTK.[Q]	1xPhospho [S4]	Not Used	0	1982.83										No Quan Values	Not Found	High	Not Found	Not Found	Not Found	Not Found	Not Found	Not Found	Not Found
O15258	-.MSEGDSVGESVHGKPSVVYR.F	[1-20]	O15258 1xPhospho [S2]; 1xMet-loss+Acetyl [N-Term]	[-].MSEGDSVGESVHGKPSVVYR.[F]	1xPhospho [S2]; 1xMet-loss+Acetyl [N-Term]	Used	0	2110.94	168.2	138.4	152.5	122	144.1	123.5	31.5		19.9		High	High	High	Peak Found	Peak Found	Peak Found	Peak Found	Not Found	Peak Found
O15320	R.APSDTGSLSPPWDQDRR.M	[588-604]	O15320-5 1xPhospho [S601]; O15320-7 1xPhospho [S524]; O15320-4 1xPhospho [S596]; O15320-9 1xPhospho [S558]; O15320-3 1xPhospho [S567]; O15320-8 1xPhospho [S516]; O15320-10 1xPhospho [S584]; O15320 1xPhospho [S596]; O15320-6 1xPhospho [S521]; O15320-2 1xPhospho [S553]; Q96PC5 1xPhospho [S1204]	[R].APSDTGSLSPPWDQDRR.[M]	1xPhospho [S9]	Used	1	1964.85	169.8	138	111.7	120.6		131.4	89.3	70.5	68.7		High	Peak Found	Peak Found	Peak Found	Not Found	High	Peak Found	Peak Found	Peak Found
O15320	K.LNRSNSELEDEILCLEK.E	[134-150]	O15320-5 1xPhospho [S144]; O15320-7 1xPhospho [S110]; P0CG41 1xPhospho [S140]; O15320-4 1xPhospho [S139]; A4D2H0 1xPhospho [S140]; O15320-9 1xPhospho [S101]; O15320-3 1xPhospho [S110]; Q8IX94 1xPhospho [S140]; O15320-8 1xPhospho [S59]; O15320-10 1xPhospho [S127]; O15320 1xPhospho [S139]; O15320-6 1xPhospho [S64]; O15320-2 1xPhospho [S139]; Q96PC5 1xPhospho [S747]; Q86UF2 1xPhospho [S140]	[K].LNRSNSELEDEILCLEK.[ED]	1xCarbamidomethyl [C14]; 1xPhospho [S6]	Used	1	2141.98	41.8	133	102.6	95.7	122	100.8	210.3		93.7		Peak Found	Peak Found	Peak Found	Peak Found	Peak Found	Peak Found	High	Not Found	Peak Found
O15320	R.SNSELEDEILCLEK.E	[137-150]	O15320-5 1xPhospho [S]; O15320-7 1xPhospho [S]; P0CG41 1xPhospho [S]; O15320-4 1xPhospho [S]; A4D2H0 1xPhospho [S]; O15320-9 1xPhospho [S]; O15320-3 1xPhospho [S]; A4FU28 1xPhospho [S]; Q8IX94 1xPhospho [S]; O15320-8 1xPhospho [S]; O15320-10 1xPhospho [S]; O15320 1xPhospho [S]; O15320-6 1xPhospho [S]; O15320-2 1xPhospho [S]; Q96PC5 1xPhospho [S]; Q86UF2 1xPhospho [S]	[R].SNSELEDEILCLEK.[ED]	1xCarbamidomethyl [C11]; 1xPhospho [S]	Used	0	1758.75		221	185		105.4		388.7				Not Found	High	Peak Found	Not Found	Peak Found	Not Found	High	Not Found	Not Found
O15344-1	K.ASVSGPNSPSETRR.E	[89-102]	O15344-2 1xPhospho [S96]; O15344-1 1xPhospho [S96]	[K].ASVSGPNSPSETRR.[E]	1xPhospho [S8]	Used	1	1524.68	115.8	107.7	106	11.5	14.1	16.3	114.7	200.4	213.5		Peak Found	Peak Found	Peak Found	Peak Found	Peak Found	Peak Found	Peak Found	Peak Found	High
O15400	K.EFGSLPTTPSEQR.Q	[72-84]	O15400 1xPhospho [T79]; O15400-2 1xPhospho [T79]	[K].EFGSLPTTPSEQR.[Q]	1xPhospho [T8]	Used	0	1528.67	73.8	111.6	94.3	49.9	51.3	59.7	138.8	163.5	157.1		High	Peak Found	Peak Found	Peak Found	Peak Found	Peak Found	Peak Found	High	High
O15400	R.ASSRVSGSFPEDSSK.E	[124-138]	O15400 1xPhospho [S]; O15400-2 1xPhospho [S]	[R].ASSRVSGSFPEDSSK.[E]	1xPhospho [S]	Used	1	1620.69	112.7	109.7	151.2	62.3	56.2	74	94.1	140.1	99.8		High	Peak Found	High	High	High	Peak Found	Peak Found	High	High
O15417-1	R.GGAVERPLTPAPR.S	[2138-2150]	O15417-1 1xPhospho [T2146]	[R].GGAVERPLTPAPR.[S]	1xPhospho [T9]	Used	0	1400.7	91.2	70	76.4	135.2	115.5	96.9	87.6	124.8	102.4		Peak Found	Peak Found	Peak Found	Peak Found	Peak Found	High	High	High	Peak Found
O15417-1	K.RTHAPSALSPPR.K	[1532-1543]	O15417-2 1xPhospho [S1540]; O15417-1 1xPhospho [S1540]	[K].RTHAPSALSPPR.[K]	1xPhospho [S9]	Used	1	1369.67		23.6	93		187.5	185.4	102.7	142	165.8		Not Found	Peak Found	Peak Found	Not Found	High	Peak Found	Peak Found	Peak Found	Peak Found
O15417-1	R.LPSVENRPK.I	[2769-2777]	O15417-1 1xPhospho [S2771]	[R].LPSVENRPK.[I]	1xPhospho [S3]	Used	0	1119.56		71.5	46.6	161.2	145.9	122.6	92.7	115.4	144.3		Not Found	Peak Found	Peak Found	High	Peak Found	High	Peak Found	Peak Found	Peak Found
O15417-1	R.ALSPGLEESGLGLLAR.F	[1855-1870]	O15417-2 1xPhospho [S1857]; O15417-1 1xPhospho [S1857]	[R].ALSPGLEESGLGLLAR.[F]	1xPhospho [S3]	Used	0	1662.85		218	143		175.3		323.7		40		Not Found	Peak Found	High	Not Found	High	Not Found	Peak Found	Not Found	Peak Found
O15427	K.NGEVVHTPETSV.-	[454-465]	O15427 1xPhospho [S464]	[K].NGEVVHTPETSV.[-]	1xDeamidated [N1]; 1xPhospho [S11]	Used	0	1349.56	204.8	227.5	164.3		16.6	27.3	94.6	91.6	73.3		High	High	High	Not Found	Peak Found	Peak Found	Peak Found	Peak Found	Peak Found
O15438-1	R.QLSALSSDGEGQGRPVPR.R	[906-923]	O15438-4 1xPhospho [S]; O15438-2 1xPhospho [S]; O15438-1 1xPhospho [S]	[R].QLSALSSDGEGQGRPVPR.[R]	1xPhospho [S]	Used	0	1933.91				377.4	290.8	231.8					Not Found	Not Found	Not Found	High	High	Peak Found	Not Found	Not Found	Not Found
O15439-1	K.DNEESEQPPVPGTPTLR.N	[634-650]	O15439-3 1xPhospho [T646]; O15439-4 1xPhospho [T571]; O15439-1 1xPhospho [T646]; O15439-2 1xPhospho [T646]	[K].DNEESEQPPVPGTPTLR.[N]	1xPhospho [T13]	Used	0	1945.85	85.7	137.2	56.8	146.2	162.1	152.8		84.4	74.8		High	High	Peak Found	High	High	High	Not Found	High	High
O15530-1	R.TQTESSTPPGIPGGSR.Q	[31-46]	O15530-1 1xPhospho [S36]; Q6A1A2 1xPhospho [S9]; O15530-5 1xPhospho [S36]; O15530-3 1xPhospho [S36]; O15530-4 1xPhospho [S36]	[R].TQTESSTPPGIPGGSR.[Q]	1xPhospho [S6]	Used	0	1651.73	76.2	99.2	72.5	53.6	107.4	118.3	112.1	135.3	125.4		Peak Found	Peak Found	Peak Found	Peak Found	Peak Found	Peak Found	Peak Found	High	Peak Found
O15530-1	R.ANSFVGTAQYVSPELLTEK.S	[239-257]	O15530-1 1xPhospho [S241]; Q6A1A2 1xPhospho [S214]; O15530-5 1xPhospho [S241]; O15530-2 1xPhospho [S191]; O15530-4 1xPhospho [S114]	[R].ANSFVGTAQYVSPELLTEK.[S]	1xPhospho [S3]	Used	0	2134.01	12	116.2	87.2	175.3	184.8	139.6	79.7	33.7	71.6		Peak Found	High	High	High	High	High	Peak Found	High	Peak Found
O15541	-.MAEQLSPGKAVDQVCTFLFK.K	[1-20]	O15541 1xPhospho [S6]; 1xMet-loss+Acetyl [N-Term]	[-].MAEQLSPGKAVDQVCTFLFK.[K]	1xCarbamidomethyl [C15]; 1xPhospho [S6]; 1xMet-loss+Acetyl [N-Term]	Used	1	2260.07		41	43.7	77	63.6	92.4	360.8	112.5	109		Not Found	Peak Found	Peak Found	Peak Found	Peak Found	Peak Found	High	Peak Found	Peak Found
O43149	K.LPSSSGLPAADVSPATAEEPLSPSTPTR.R	[1497-1524]	O43149 1xPhospho [S/T]	[K].LPSSSGLPAADVSPATAEEPLSPSTPTR.[R]	1xPhospho [S/T]	Used	0	2815.34		77.6	64	91.1	67.8	84.5	181.6	181.9	151.6		Not Found	High	Peak Found	High	High	Peak Found	Peak Found	Peak Found	Peak Found
O43150-1	R.SSSDPPAVHPPLPPLR.V	[820-835]	O43150-1 1xPhospho [S]	[R].SSSDPPAVHPPLPPLR.[V]	1xPhospho [S]	Used	0	1746.86	29.7	20.1	24	291.7	246.8	255.3		17.6	14.7		Peak Found	Peak Found	High	High	High	High	Not Found	Peak Found	Peak Found
O43151	R.SLGDTLYQELTDTLRKYGNPTSR.R	[799-821]	O43151-2 2xPhospho [T811; T819]; O43151 2xPhospho [T811; T819]	[R].SLGDTLYQELTDTLRKYGNPTSR.[R]	1xDeamidated [N19]; 2xPhospho [T13; T21]	Used	2	2789.24	256.1	34.3	101.4	77.7	88.3	75.2		96	171.1		Peak Found	Peak Found	Peak Found	Peak Found	Peak Found	Peak Found	Not Found	Peak Found	High
O43159	K.QSPGSTSPKPPHTLSR.K	[170-185]	O43159 1xPhospho [S]	[K].QSPGSTSPKPPHTLSR.[K]	1xPhospho [S]	Used	0	1756.84	93.2	53.9	53.9	97.8	142.4	95.2	90.9	137.6	135.3		Peak Found	Peak Found	Peak Found	Peak Found	Peak Found	Peak Found	Peak Found	High	High
O43159	K.QGPPCSDSEEEVER.K	[99-112]	O43159 1xPhospho [S104]	[K].QGPPCSDSEEEVER.[K]	1xCarbamidomethyl [C5]; 1xPhospho [S6]	Used	0	1698.63		75.8	72.7		153.9	156.9	148.1	149.5	143.1		Not Found	Peak Found	Peak Found	Not Found	Peak Found	Peak Found	Peak Found	Peak Found	High
O43166-1	R.DLRASPKPTSK.S	[1524-1534]	O43166-1 1xPhospho [S1528]; O43166-2 1xPhospho [S1507]; O43166-3 1xPhospho [S1507]	[R].DLRASPKPTSK.[S]	1xPhospho [S5]	Used	1	1279.64	142.7	144.8	3	115.4	142	130.4	46.9	94.2	80.6		High	Peak Found	Peak Found	High	High	High	Peak Found	High	High
O43166-1	R.HSASPVVFTSAR.S	[1430-1441]	O43166-1 1xPhospho [S1433]; O43166-2 1xPhospho [S1412]; O43166-3 1xPhospho [S1412]	[R].HSASPVVFTSAR.[S]	1xPhospho [S4]	Used	0	1338.62	227.9	161.8	186	109.6	112.2	102.6					Peak Found	High	High	Peak Found	Peak Found	High	Not Found	Not Found	Not Found
O43166-1	R.SKSETGDSSIFR.K	[286-297]	O43166-1 1xPhospho [S288]; O43166-2 1xPhospho [S288]; O43166-3 1xPhospho [S288]	[R].SKSETGDSSIFR.[K]	1xPhospho [S3]	Used	1	1393.6	113.1	112.3	72.4	89.3	88	70.7	103.9	104.8	145.4		Peak Found	Peak Found	High	High	Peak Found	High	Peak Found	Peak Found	High
O43166-1	R.TLSDESIYNSQR.E	[1583-1594]	O43166-1 1xPhospho [S]; O43166-2 1xPhospho [S]; O43166-3 1xPhospho [S]	[R].TLSDESIYNSQR.[E]	1xPhospho [S]	Used	0	1492.63	92.7	130.9	136.1	112.8	100.4	116	72.3	70.6	68.3		High	Peak Found	High	High	High	High	High	High	High
O43166-1	R.SSPKEELHPAAPSQLAPSFSSSSSSSSGPR.S	[1442-1471]	O43166-1 1xPhospho [S]; O43166-2 1xPhospho [S]; O43166-3 1xPhospho [S]	[R].SSPKEELHPAAPSQLAPSFSSSSSSSSGPR.[S]	1xPhospho [S]	Used	1	3079.4	83.5	150.9	296.7	75.8	119.5	84.3		42.2	47.2		High	Peak Found	High	Peak Found	High	Peak Found	Not Found	Peak Found	Peak Found
O43166-1	K.LIDLESPTPESQK.S	[1544-1556]	O43166-1 1xPhospho [S/T]; O43166-2 1xPhospho [S/T]; O43166-3 1xPhospho [S/T]	[K].LIDLESPTPESQK.[S]	1xPhospho [S/T]	Used	0	1536.72	88.8	139.5	124.2	118.8	88.5	90.7	77	87.5	85		Peak Found	High	High	Peak Found	High	High	High	High	Peak Found
O43237	R.GGPASVPSSSPGTSVK.K	[398-413]	O43237 1xPhospho [S/T]; O43237-2 1xPhospho [S/T]	[R].GGPASVPSSSPGTSVK.[K]	1xPhospho [S/T]	Used	0	1494.68	38.1	75.6	41.4	142.1	99.7	115.5	121.5	158.1	107.9		Peak Found	High	Peak Found	Peak Found	Peak Found	High	Peak Found	Peak Found	Peak Found
O43237	K.DFQDYMEPEEGCQGSPQR.R	[180-197]	O43237 1xPhospho [S194]; O43237-2 1xPhospho [S117]	[K].DFQDYMEPEEGCQGSPQR.[R]	1xCarbamidomethyl [C12]; 1xPhospho [S15]; 1xOxidation [M6]	Used	0	2268.82		118.7	55.1	59.6	82	92.6	192	138.6	161.4		Not Found	Peak Found	Peak Found	Peak Found	Peak Found	Peak Found	Peak Found	Peak Found	High
O43237	K.DFQDYMEPEEGCQGSPQR.R	[180-197]	O43237 1xPhospho [S194]; O43237-2 1xPhospho [S117]	[K].DFQDYMEPEEGCQGSPQR.[R]	1xCarbamidomethyl [C12]; 1xPhospho [S15]	Used	0	2252.83		102.6	77.8	93.1	94.5	71.7	191.3	128.6	140.3		Not Found	Peak Found	High	Peak Found	High	Peak Found	High	High	Peak Found
O43290	R.RVSEVEEEKEPVPQPLPSDDTR.V	[446-467]	O43290 1xPhospho [S448]	[R].RVSEVEEEKEPVPQPLPSDDTR.[V]	1xPhospho [S3]	Used	2	2616.22	174.9	86.1	96.8	78	103.4	65	96.1	105.2	94.3		High	High	High	Peak Found	High	High	Peak Found	High	Peak Found
O43306	R.DAEPPSPTPAGPPR.C	[49-62]	O43306 1xPhospho [S54]; O43306-2 1xPhospho [S54]	[R].DAEPPSPTPAGPPR.[C]	1xPhospho [S6]	Used	0	1468.65				182.4	181.9	201.5		170.6	163.7		Not Found	Not Found	Not Found	Peak Found	High	High	Not Found	Peak Found	High
O43318	R.RRSIQDLTVTGTEPGQVSSR.S	[437-456]	O43318-2 1xPhospho [S412]; O43318 1xPhospho [S439]; O43318-3 1xPhospho [S439]; O43318-4 1xPhospho [S412]	[R].RRSIQDLTVTGTEPGQVSSR.[S]	1xPhospho [S3]	Used	2	2267.11	900										High	Not Found	Not Found	Not Found	Not Found	Not Found	Not Found	Not Found	Not Found
O43318	R.GSSVESLPPTSEGKR.M	[373-387]	O43318-2 1xPhospho [S375]; O43318 1xPhospho [S375]; O43318-3 1xPhospho [S375]; O43318-4 1xPhospho [S375]	[R].GSSVESLPPTSEGKR.[M]	1xPhospho [S3]	Used	1	1610.74	271.9	378		250.1							Peak Found	High	Not Found	Peak Found	Not Found	Not Found	Not Found	Not Found	Not Found
O43318	R.SIQDLTVTGTEPGQVSSR.S	[439-456]	O43318-2 1xPhospho [S412]; O43318 1xPhospho [S439]; O43318-3 1xPhospho [S439]; O43318-4 1xPhospho [S412]	[R].SIQDLTVTGTEPGQVSSR.[S]	1xPhospho [S1]	Used	0	1954.91		202.2	120.5	122.5	56	57.7	142.8	95.7	102.5		Not Found	High	Peak Found	Peak Found	High	High	Peak Found	Peak Found	Peak Found
O43353-1	R.SPSLNLLQNK.S	[529-538]	O43353-1 1xPhospho [S531]; O43353-2 1xPhospho [S394]	[R].SPSLNLLQNK.[S]	1xPhospho [S3]	Used	0	1193.59	107.4	149	122.3	50.4	59.6	97.8	143	85.9	84.6		High	High	High	Peak Found	Peak Found	Peak Found	Peak Found	Peak Found	Peak Found
O43379-1	R.AGTGYASPDRTHVLAAGK.A	[1138-1155]	O43379-4 1xPhospho [T1145]; O43379-1 1xPhospho [T1140]	[R].AGTGYASPDRTHVLAAGK.[A]	1xPhospho [T3]	Used	1	1851.87	78.8	51.1	135.4	196.9	254.3		32.1	80.8	70.7		Peak Found	Peak Found	Peak Found	High	Peak Found	Not Found	Peak Found	Peak Found	Peak Found
O43379-1	R.TRLSTASEETVQNR.V	[46-59]	O43379-3 1xPhospho [T/S]; O43379-4 1xPhospho [T/S]; O43379-2 1xPhospho [T/S]; O43379-1 1xPhospho [T/S]	[R].TRLSTASEETVQNR.[V]	1xPhospho [T/S]	Used	1	1671.77	148.6	87.4	65.6	119.3	122	93.7		141	122.4		High	Peak Found	Peak Found	High	Peak Found	Peak Found	Not Found	Peak Found	Peak Found
O43379-1	R.RGQSSPPPAPPICLR.R	[29-43]	O43379-3 1xPhospho [S]; O43379-4 1xPhospho [S]; O43379-2 1xPhospho [S]; O43379-1 1xPhospho [S]	[R].RGQSSPPPAPPICLR.[R]	1xCarbamidomethyl [C13]; 1xPhospho [S]	Used	1	1712.83	47.2	59.1	70.1	142.1	189.3	199.2	68.2	58.4	66.3		High	Peak Found	High	High	High	High	High	High	High
O43379-1	R.GQSSPPPAPPICLR.R	[30-43]	O43379-3 1xPhospho [S]; O43379-4 1xPhospho [S]; O43379-2 1xPhospho [S]; O43379-1 1xPhospho [S]	[R].GQSSPPPAPPICLR.[R]	1xCarbamidomethyl [C12]; 1xPhospho [S]	Used	0	1556.73	48	62.8	46.4	327.7	134.3	109.5	74.2	55.6	41.6		Peak Found	Peak Found	Peak Found	High	Peak Found	Peak Found	Peak Found	Peak Found	Peak Found
O43395	K.GDDDEESDEEAVKK.T	[613-626]	O43395 1xPhospho [S619]	[K].GDDDEESDEEAVKK.[T]	1xPhospho [S7]	Used	1	1645.61	113	113.5	75.1	110.8	107.8	90.1	104.8	104	80.9		Peak Found	High	High	High	High	High	Peak Found	Peak Found	High
O43399	R.NSATFKSFEDR.V	[160-170]	O43399-6 1xPhospho [S123]; O43399 1xPhospho [S166]; O43399-3 1xPhospho [S169]; O43399-7 1xPhospho [S189]; O43399-5 1xPhospho [S180]; O43399-2 1xPhospho [S146]; O43399-4 1xPhospho [S160]	[R].NSATFKSFEDR.[V]	1xPhospho [S7]	Used	1	1381.58	61	83.8	25.8	62.9	47.1	40.5	17.2	306.4	255.3		High	High	Peak Found	High	High	High	Peak Found	High	High
O43399	K.GLLSDSMTDVPVDTGVAAR.T	[16-34]	O43399 1xPhospho [S19]; O43399-3 1xPhospho [S19]; O43399-7 1xPhospho [S19]; O43399-5 1xPhospho [S19]; O43399-2 1xPhospho [S19]; O43399-4 1xPhospho [S19]	[K].GLLSDSMTDVPVDTGVAAR.[T]	1xPhospho [S4]; 1xOxidation [M7]	Used	0	1999.9		499.9	173	94.1				62.6	70.4		Not Found	High	Peak Found	Peak Found	Not Found	Not Found	Not Found	Peak Found	Peak Found
O43399	K.GLLSDSMTDVPVDTGVAAR.T	[16-34]	O43399 1xPhospho [S19]; O43399-3 1xPhospho [S19]; O43399-7 1xPhospho [S19]; O43399-5 1xPhospho [S19]; O43399-2 1xPhospho [S19]; O43399-4 1xPhospho [S19]	[K].GLLSDSMTDVPVDTGVAAR.[T]	1xPhospho [S4]	Used	0	1983.91		460.2	195.4	140	57.5				46.9		Not Found	High	Peak Found	Peak Found	Peak Found	Not Found	Not Found	Not Found	Peak Found
O43399	R.SWHDVQVSSAYVK.T	[96-108]	O43399 1xPhospho [S96]; O43399-7 1xPhospho [S96]; O43399-5 1xPhospho [S96]	[R].SWHDVQVSSAYVK.[T]	1xPhospho [S1]	Used	0	1585.7	49.3	102.8	74	121.8	184	120.7	84.8	91.2	71.5		Peak Found	Peak Found	Peak Found	Peak Found	High	Peak Found	Peak Found	High	Peak Found
O43399	R.NSATFKSFEDR.V	[160-170]	O43399-6 1xPhospho [S123]; O43399 1xPhospho [S166]; O43399-3 1xPhospho [S169]; O43399-7 1xPhospho [S189]; O43399-5 1xPhospho [S180]; O43399-2 1xPhospho [S146]; O43399-4 1xPhospho [S160]	[R].NSATFKSFEDR.[V]	1xDeamidated [N1]; 1xPhospho [S7]	Used	1	1382.56	48.3	103.1	37.7	56.8	46.1	51.2	18.9	325.9	212		Peak Found	Peak Found	Peak Found	Peak Found	Peak Found	Peak Found	Peak Found	High	Peak Found
O43399	-.MDSAGQDINLNSPNKGLLSDSMTDVPVDTGVAAR.T	[1-34]	O43399 1xAcetyl [N-Term]; 1xPhospho [S3]; O43399-3 1xAcetyl [N-Term]; 1xPhospho [S3]; O43399-7 1xAcetyl [N-Term]; 1xPhospho [S3]; O43399-5 1xAcetyl [N-Term]; 1xPhospho [S3]; O43399-2 1xAcetyl [N-Term]; 1xPhospho [S3]; O43399-4 1xAcetyl [N-Term]; 1xPhospho [S3]	[-].MDSAGQDINLNSPNKGLLSDSMTDVPVDTGVAAR.[T]	1xAcetyl [N-Term]; 1xPhospho [S3]	Used	1	3610.64	38.9	118.7	228.7	63.9	63.8	44.5	193.8	93.9	53.8		Peak Found	High	High	Peak Found	Peak Found	Peak Found	High	Peak Found	Peak Found
O43399	-.MDSAGQDINLNSPNK.G	[1-15]	O43399 1xAcetyl [N-Term]; 1xPhospho [S3]; O43399-3 1xAcetyl [N-Term]; 1xPhospho [S3]; O43399-7 1xAcetyl [N-Term]; 1xPhospho [S3]; O43399-5 1xAcetyl [N-Term]; 1xPhospho [S3]; O43399-2 1xAcetyl [N-Term]; 1xPhospho [S3]; O43399-4 1xAcetyl [N-Term]; 1xPhospho [S3]	[-].MDSAGQDINLNSPNK.[G]	1xAcetyl [N-Term]; 1xPhospho [S3]	Used	0	1725.71		169.4	107.6	84.2	86	62	147.3	134.1	109.3		Not Found	High	Peak Found	High	Peak Found	Peak Found	Peak Found	Peak Found	Peak Found
O43432	K.SPSPVLR.L	[230-236]	O43432 1xPhospho [S232]; O43432-3 1xPhospho [S238]; O43432-2 1xPhospho [S243]	[K].SPSPVLR.[L]	1xPhospho [S3]	Used	0	835.407	28.1	88.6	87.2	155.3	108.6	121.3	101.7	101.9	107.3		High	High	Peak Found	High	High	High	High	High	High
O43432	R.RSPVPAQIAITVPK.T	[494-507]	O43432 1xPhospho [S495]; O43432-3 1xPhospho [S501]	[R].RSPVPAQIAITVPK.[T]	1xPhospho [S2]	Used	1	1556.86	61.3	65.6	53.7	155.1	160	162.3	83.5	85.8	72.8		High	High	High	High	High	High	High	High	High
O43432	R.SPVPAQIAITVPK.T	[495-507]	O43432 1xPhospho [S495]; O43432-3 1xPhospho [S501]	[R].SPVPAQIAITVPK.[T]	1xPhospho [S1]	Used	0	1400.75	64.1	64.5	41.6	190.1	120.4	148.2	86.9	104.7	79.7		High	Peak Found	Peak Found	High	Peak Found	High	Peak Found	High	Peak Found
O43432	K.LDFIESDSPCSSEALSK.K	[1402-1418]	O43432 1xPhospho [S]; O43432-3 1xPhospho [S]; O43432-4 1xPhospho [S]	[K].LDFIESDSPCSSEALSK.[K]	1xCarbamidomethyl [C10]; 1xPhospho [S]	Used	0	1964.82	165.2	82.6	59.2	189.3	154	119.5	31.8	59.7	38.7		Peak Found	Peak Found	Peak Found	High	High	Peak Found	Peak Found	Peak Found	Peak Found
O43491-1	R.SPTKAPHLQLIEGK.K	[598-611]	O43491-2 1xPhospho [T600]; O43491-4 1xPhospho [T600]; O43491-1 1xPhospho [T600]	[R].SPTKAPHLQLIEGK.[TSK]	1xPhospho [T3]	Used	1	1598.83	900										High	Not Found	Not Found	Not Found	Not Found	Not Found	Not Found	Not Found	Not Found
O43491-1	R.EVRSPTKAPHLQLIEGK.K	[595-611]	O43491-2 1xPhospho [S/T]; O43491-4 1xPhospho [S/T]; O43491-1 1xPhospho [S/T]	[R].EVRSPTKAPHLQLIEGK.[TSK]	1xPhospho [S/T]	Used	2	1983.04	241.6	51.9	390.1		6.5		52.9	69.3	87.7		High	High	High	Not Found	Peak Found	Not Found	Peak Found	Peak Found	High
O43493-1	K.TESGEETDLISPPQEEVK.S	[296-313]	O43493-2 1xPhospho [T296]; O43493-3 1xPhospho [T296]; O43493-1 1xPhospho [T296]; O43493-5 1xPhospho [T296]	[K].TESGEETDLISPPQEEVK.[S]	1xPhospho [T1]	Used	0	2067.9		900									Not Found	High	Not Found	Not Found	Not Found	Not Found	Not Found	Not Found	Not Found
O43561	R.EYVNVSQELHPGAAK.T	[219-233]	O43561-5 1xPhospho [S223]; O43561-2 1xPhospho [S195]; O43561 1xPhospho [S224]; O43561-3 1xPhospho [S231]; O43561-4 1xPhospho [S194]	[R].EYVNVSQELHPGAAK.[T]	1xPhospho [S6]	Used	0	1721.79				43.5	53.3	49.2	225.1	260	268.8		Not Found	Not Found	Not Found	Peak Found	Peak Found	Peak Found	Peak Found	High	High
O43561	R.SPQPLGGSHR.T	[84-93]	O43561-2 1xPhospho [S84]; O43561 1xPhospho [S84]; O43561-3 1xPhospho [S120]	[R].SPQPLGGSHR.[T]	1xPhospho [S1]	Used	0	1115.5				71.6	38.9	35.3	204.5	274	275.8		Not Found	Not Found	Not Found	Peak Found	Peak Found	Peak Found	High	High	High
O43566	R.LGSPDATR.K	[201-208]	O43566 1xPhospho [S203]; O43566-5 1xPhospho [S50]; O43566-4 1xPhospho [S50]	[R].LGSPDATR.[K]	1xPhospho [S3]	Used	0	896.387		10.3	5.3	108.7	94.4	118.1	120.3	242.2	200.6		Not Found	Peak Found	Peak Found	Peak Found	Peak Found	High	Peak Found	Peak Found	High
O43566	K.SLGSTEGESESRPGK.Y	[288-302]	O43566-6 1xPhospho [S68]; O43566 1xPhospho [S288]; O43566-5 1xPhospho [S135]; O43566-4 1xPhospho [S135]	[K].SLGSTEGESESRPGK.[Y]	1xPhospho [S1]	Used	0	1600.69				201.1	208.8	137.3	85.4	120.1	147.4		Not Found	Not Found	Not Found	High	High	Peak Found	High	High	High
O43572	K.QSSLAEPVSPSK.K	[179-190]	O43572 1xPhospho [S187]	[K].QSSLAEPVSPSK.[K]	1xPhospho [S9]	Used	0	1309.6	127.7	104.3	86.7	68.5			180	172	160.7		Peak Found	High	High	Peak Found	Not Found	Not Found	High	High	High
O43581-1	R.YKNSLETVGTPDSGR.G	[49-63]	O43581-1 1xPhospho [S52]; O43581-5 1xPhospho [S52]; O43581-3 1xPhospho [S52]; O43581-2 1xPhospho [S52]; O43581-4 1xPhospho [S52]; O43581-6 1xPhospho [S52]	[R].YKNSLETVGTPDSGR.[G]	1xPhospho [S4]	Used	1	1703.76	221.2	137.4	163.8	109.7	127.6	140.4					High	Peak Found	Peak Found	Peak Found	Peak Found	Peak Found	Not Found	Not Found	Not Found
O43583	K.LTVENSPKQEAGISEGQGTAGEEEEK.K	[68-93]	O43583 1xPhospho [T/S]	[K].LTVENSPKQEAGISEGQGTAGEEEEK.[K]	1xPhospho [T/S]	Used	1	2797.24	91.2	67.3	48.5	100.9	87.2	86.1	130.4	168.9	119.5		Peak Found	High	High	High	Peak Found	High	Peak Found	Peak Found	Peak Found
O43583	K.LTVENSPK.Q	[68-75]	O43583 1xPhospho [S73]	[K].LTVENSPK.[Q]	1xPhospho [S6]	Used	0	967.45	63.1		44.1	135.6	45.1		226.6	210.3	175.2		Peak Found	Not Found	Peak Found	Peak Found	Peak Found	Not Found	Peak Found	High	Peak Found
O43598-1	R.YFEADPPGQVAASPDPTT.-	[157-174]	O43598-1 1xPhospho [S169]	[R].YFEADPPGQVAASPDPTT.[-]	1xPhospho [S13]	Used	0	1942.81		237.7	211.4	90.1	69.2	61.5	93.9	81.5	54.6		Not Found	High	High	Peak Found	Peak Found	High	Peak Found	Peak Found	Peak Found
O43639	R.DASPTPSTDAEYPANGSGADR.I	[88-108]	O43639 1xPhospho [T92]	[R].DASPTPSTDAEYPANGSGADR.[I]	1xPhospho [T5]	Used	0	2158.86		156.6	119.6	167.7	106.9	80	105.1	78.3	85.7		Not Found	Peak Found	Peak Found	High	Peak Found	Peak Found	Peak Found	Peak Found	Peak Found
O43639	R.DASPTPSTDAEYPANGSGADR.I	[88-108]	O43639 1xPhospho [S90]	[R].DASPTPSTDAEYPANGSGADR.[I]	1xDeamidated [N15]; 1xPhospho [S3]	Used	0	2159.84	52.9	130.2	139.3	152.3	95.2	97.4	108.5	64.2	59.9		Peak Found	High	Peak Found	Peak Found	Peak Found	Peak Found	Peak Found	Peak Found	Peak Found
O43719	K.VFDDESDEKEDEEYADEKGLEAADK.K	[637-661]	O43719 1xPhospho [Y/S]	[K].VFDDESDEKEDEEYADEKGLEAADK.[K]	1xPhospho [Y/S]	Used	2	2956.18	98.9	110.9	98.6	85.3	137.4	66.3	114.5	84.9	103.3		Peak Found	Peak Found	Peak Found	Peak Found	Peak Found	Peak Found	Peak Found	High	High
O43719	K.VLDEEGSER.E	[610-618]	O43719 1xPhospho [S616]	[K].VLDEEGSER.[E]	1xPhospho [S7]	Used	0	1113.45	89.6	85.9		125.8	91.4	97.5	172.1	113.3	124.4		Peak Found	Peak Found	Not Found	Peak Found	Peak Found	Peak Found	Peak Found	Peak Found	High
O43719	K.VFDDESDEKEDEEYADEK.G	[637-654]	O43719 1xPhospho [S642]	[K].VFDDESDEKEDEEYADEK.[G]	1xPhospho [S6]	Used	1	2271.83	192.6	113.8	68	107.2	132.5	38.4	105.6	60.6	81.2		Peak Found	High	Peak Found	Peak Found	Peak Found	Peak Found	Peak Found	Peak Found	Peak Found
O43719	K.ESEEGNPVRGSEEDSPKK.E	[484-501]	O43719 1xPhospho [S]	[K].ESEEGNPVRGSEEDSPKK.[E]	1xPhospho [S]	Used	2	2053.87	114.9	83.6	90.1	89.1	112.3	87.5	87.7	115.5	119.4		Peak Found	Peak Found	Peak Found	High	Peak Found	High	Peak Found	Peak Found	High
O43719	K.ESSPEKEAEEGCPEKESEEGCPK.R	[451-473]	O43719 1xPhospho [S]	[K].ESSPEKEAEEGCPEKESEEGCPK.[R]	2xCarbamidomethyl [C12; C21]; 1xPhospho [S]	Used	2	2702.05	136.2	103.4	103.5	75	118.1	80.9	83.9	93.4	105.6		High	High	High	High	High	High	High	High	High
O43765	K.EMPQDLRSPARTPPSEEDSAEAER.L	[70-93]	O43765 2xPhospho [S77; S84]	[K].EMPQDLRSPARTPPSEEDSAEAER.[L]	2xPhospho [S8; S15]; 1xOxidation [M2]	Used	2	2874.16	20.7	210.8	197.2	55.3	81.7	69.7	68.5	81.2	115		Peak Found	High	High	Peak Found	Peak Found	Peak Found	Peak Found	High	High
O43765	K.EMPQDLRSPARTPPSEEDSAEAER.L	[70-93]	O43765 2xPhospho [S77; S84]	[K].EMPQDLRSPARTPPSEEDSAEAER.[L]	2xPhospho [S8; S15]	Used	2	2858.17	143.5	164.4	199	28.5	82.4	48.4	54.7	70.1	109		Peak Found	High	High	Peak Found	Peak Found	Peak Found	Peak Found	Peak Found	Peak Found
O43765	R.SPARTPPSEEDSAEAER.L	[77-93]	O43765 1xPhospho [T/S]	[R].SPARTPPSEEDSAEAER.[L]	1xPhospho [T/S]	Used	1	1908.8	83.5	132	118.5	55.4	73.5	63	107.8	133.4	132.9		High	High	High	High	High	High	High	High	High
O43765	R.SRTPSASNDDQQE.-	[301-313]	O43765 1xPhospho [S305]	[R].SRTPSASNDDQQE.[-]	1xPhospho [S5]	Used	1	1514.58	100.2	132.5	84.5	60.5	42.7	55.2	125.2	150.9	148.1		High	High	High	High	High	High	High	High	High
O43765	R.TPSASNDDQQE.-	[303-313]	O43765 1xPhospho [S305]	[R].TPSASNDDQQE.[-]	1xPhospho [S3]	Used	0	1271.44		194.1	73.2	68.5	44.9	67.1	96.8	190.1	165.3		Not Found	High	Peak Found	Peak Found	Peak Found	Peak Found	Peak Found	Peak Found	High
O43765	R.SRTPSASNDDQQE.-	[301-313]	O43765 1xPhospho [S305]	[R].SRTPSASNDDQQE.[-]	1xDeamidated [Q12]; 1xPhospho [S5]	Used	1	1515.56	109.5	143.1	103.7	20.6	57.7	67.4	126.7	153	118.3		High	Peak Found	Peak Found	Peak Found	Peak Found	Peak Found	Peak Found	Peak Found	Peak Found
O43768	-.MSQKQEEENPAEETGEEKQDTQEK.E	[1-24]	O43768-2 1xPhospho [S2]; 1xMet-loss+Acetyl [N-Term]; O43768-9 1xPhospho [S2]; 1xMet-loss+Acetyl [N-Term]; O43768-8 1xPhospho [S2]; 1xMet-loss+Acetyl [N-Term]; O43768-4 1xPhospho [S2]; 1xMet-loss+Acetyl [N-Term]; O43768-3 1xPhospho [S2]; 1xMet-loss+Acetyl [N-Term]; O43768 1xPhospho [S2]; 1xMet-loss+Acetyl [N-Term]	[-].MSQKQEEENPAEETGEEKQDTQEK.[E]	1xPhospho [S2]; 1xMet-loss+Acetyl [N-Term]	Used	2	2813.16	39.7	53	28.3	124.8	140.1	113	140.3	117	143.9		Peak Found	Peak Found	Peak Found	Peak Found	High	Peak Found	Peak Found	Peak Found	Peak Found
O43818	K.MNEEISSDSESESLAPR.K	[45-61]	O43818 1xPhospho [S]	[K].MNEEISSDSESESLAPR.[K]	1xPhospho [S]; 1xOxidation [M1]	Used	0	1976.78	197	201.7	287.9		60.8		70.8	41.2	40.6		High	High	High	Not Found	Peak Found	Not Found	Peak Found	Peak Found	Peak Found
O43818	K.MNEEISSDSESESLAPR.K	[45-61]	O43818 1xPhospho [S]	[K].MNEEISSDSESESLAPR.[K]	1xPhospho [S]	Used	0	1960.78		548.8	351.2								Not Found	High	High	Not Found	Not Found	Not Found	Not Found	Not Found	Not Found
O43822	R.ALSEGEEITAAPER.E	[134-147]	O43822-3 1xPhospho [S136]; O43822-4 1xPhospho [S136]; O43822-2 1xPhospho [S95]; O43822 1xPhospho [S136]	[R].ALSEGEEITAAPER.[E]	1xPhospho [S3]	Used	0	1552.69				152.7	113.6		190.5	266	177.2		Not Found	Not Found	Not Found	Peak Found	Peak Found	Not Found	Peak Found	High	Peak Found
O43823	R.VDSEGDFSENDDAAGDFR.S	[321-338]	O43823 1xPhospho [S323]	[R].VDSEGDFSENDDAAGDFR.[S]	1xDeamidated [N10]; 1xPhospho [S3]	Not Used	0	2026.72										No Quan Values	Not Found	Not Found	Not Found	High	Not Found	Not Found	Not Found	Not Found	Not Found
O43823	R.VDSEGDFSENDDAAGDFR.S	[321-338]	O43823 1xPhospho [S]	[R].VDSEGDFSENDDAAGDFR.[S]	1xPhospho [S]	Used	0	2025.73	70	97.2	102.5	118.5	70.2	59.9	162.6	101.6	117.6		Peak Found	Peak Found	Peak Found	Peak Found	Peak Found	Peak Found	High	High	High
O43847-1	R.LGADESEEEGRRGSLSNAGDPEIVK.S	[81-105]	O43847-2 1xPhospho [S]; O43847-1 1xPhospho [S]	[R].LGADESEEEGRRGSLSNAGDPEIVK.[S]	1xPhospho [S]	Used	2	2695.22	240.8	159.1	240.5	44.8	64	50.6	23	30.5	46.6		High	High	High	Peak Found	Peak Found	Peak Found	Peak Found	Peak Found	Peak Found
O43847-1	R.RGSLSNAGDPEIVK.S	[92-105]	O43847-2 1xPhospho [S]; O43847-1 1xPhospho [S]	[R].RGSLSNAGDPEIVK.[S]	1xPhospho [S]	Used	1	1522.73	285.5	202.2	147.1	53.8	53.8	43.3	39	37.3	38		High	High	High	High	High	High	High	High	High
O43896	R.MPSARPPSPPLSSWER.V	[908-923]	O43896 1xPhospho [S910]	[R].MPSARPPSPPLSSWER.[V]	1xPhospho [S3]; 1xOxidation [M1]	Used	0	1890.86	106.4	137.6	78	106.8	78.1	94	77.2	100.5	121.5		Peak Found	Peak Found	Peak Found	Peak Found	Peak Found	Peak Found	Peak Found	High	Peak Found
O43896	R.MPSARPPSPPLSSWER.V	[908-923]	O43896 1xPhospho [S910]	[R].MPSARPPSPPLSSWER.[V]	1xPhospho [S3]	Used	0	1874.86	114	177.1	112.2	129.1	87.5	71.3	53.3	101.2	54.3		High	Peak Found	Peak Found	Peak Found	Peak Found	Peak Found	Peak Found	Peak Found	Peak Found
O43896	R.LYADSDSGDDSDKR.S	[670-683]	O43896 1xPhospho [S]	[R].LYADSDSGDDSDKR.[S]	1xPhospho [S]	Used	1	1623.62	76.6	162.9	146	84.8	102.5	100.4	91	77	58.8		High	High	High	High	High	Peak Found	Peak Found	Peak Found	High
O43933	R.TASQEGCQELTQEQR.D	[1179-1193]	O43933-2 1xPhospho [S/T]; O43933 1xPhospho [S/T]	[R].TASQEGCQELTQEQR.[D]	1xCarbamidomethyl [C7]; 1xPhospho [S/T]	Used	0	1844.75	17.2	104.9		216.3		142.6	140.9	132.5	145.6		Peak Found	High	Not Found	High	Not Found	High	High	High	High
O60229-1	K.SESVANLQAQPSLNSIHSSPGPK.R	[1739-1761]	O60229-5 1xPhospho [S]; O60229-6 1xPhospho [S]; O60229-4 1xPhospho [S]; O60229-1 1xPhospho [S]	[K].SESVANLQAQPSLNSIHSSPGPK.[R]	1xPhospho [S]	Used	0	2428.15				297.2	253	185.9		82.9	81		Not Found	Not Found	Not Found	Peak Found	High	High	Not Found	Peak Found	Peak Found
O60231	K.QQTEKPESEDEWER.T	[153-166]	O60231 1xPhospho [T/S]	[K].QQTEKPESEDEWER.[T]	1xPhospho [T/S]	Used	0	1870.75	135.6	101.3	58.1	84.1	51	57.7	123.1	149.1	140.1		High	Peak Found	Peak Found	Peak Found	Peak Found	Peak Found	Peak Found	High	High
O60231	R.LLEDSEESSEETVSR.A	[99-113]	O60231 1xPhospho [S]	[R].LLEDSEESSEETVSR.[A]	1xPhospho [S/T]	Used	0	1789.74	109	97.2	89.4	90.3	84.2	91.8	121.3	122.9	94		High	High	High	Peak Found	High	High	High	High	High
O60244	R.KLSDDPCPVESK.K	[615-626]	O60244 1xPhospho [S617]	[R].KLSDDPCPVESK.[K]	1xCarbamidomethyl [C7]; 1xPhospho [S3]	Used	1	1454.62	156.1	112.7	148.5		82.9	74.2	98.6	116.6	110.6		Peak Found	High	High	Not Found	High	Peak Found	Peak Found	High	High
O60264	K.TPTSPLK.M	[113-119]	O60264 1xPhospho [S116]	[K].TPTSPLK.[M]	1xPhospho [S4]	Used	0	823.396	69.6	78.7	79.4	93	77.9	94	115.7	168.8	122.8		High	High	Peak Found	High	Peak Found	High	High	High	High
O60271	R.SASQSSLDKLDQELKEQQK.E	[728-746]	O60271-3 2xPhospho [S730; S732]; O60271-5 2xPhospho [S716; S718]; O60271-9 2xPhospho [S573; S575]; O60271 2xPhospho [S730; S732]; O60271-2 2xPhospho [S720; S722]; O60271-4 2xPhospho [S716; S718]	[R].SASQSSLDKLDQELKEQQK.[E]	1xDeamidated [Q12]; 2xPhospho [S3; S5]	Not Used	2	2323.01										No Quan Values	Not Found	High	Not Found	Not Found	Not Found	Not Found	Not Found	Not Found	Not Found
O60271	R.SASQSSLDKLDQELKEQQK.E	[728-746]	O60271-3 2xPhospho [S730; S732]; O60271-5 2xPhospho [S716; S718]; O60271-9 2xPhospho [S573; S575]; O60271 2xPhospho [S730; S732]; O60271-2 2xPhospho [S720; S722]; O60271-4 2xPhospho [S716; S718]	[R].SASQSSLDKLDQELKEQQK.[E]	2xPhospho [S3; S5]	Used	2	2322.03	119	144.5	162.8	61.8	113	60.2	92	60.7	85.9		High	High	High	Peak Found	High	High	Peak Found	Peak Found	Peak Found
O60271	K.GSSTPTKGIENK.A	[362-373]	O60271-3 1xPhospho [T/S]; O60271-5 1xPhospho [T/S]; O60271-9 1xPhospho [T/S]; O60271 1xPhospho [T/S]; O60271-2 1xPhospho [T/S]; O60271-4 1xPhospho [T/S]	[K].GSSTPTKGIENK.[A]	1xPhospho [T/S]	Used	1	1298.6	76.4	113.8	119.7	73.9	71	127.6	70.7	137.6	109.3		Peak Found	High	High	Peak Found	Peak Found	High	High	Peak Found	High
O60271	R.SASQSSLDKLDQELKEQQK.E	[728-746]	O60271-3 1xPhospho [S]; O60271-5 1xPhospho [S]; O60271-9 1xPhospho [S]; O60271 1xPhospho [S]; O60271-2 1xPhospho [S]; O60271-4 1xPhospho [S]	[R].SASQSSLDKLDQELKEQQK.[E]	1xPhospho [S]	Used	2	2242.06	100.4	97.1	145.1	81.5	153.8	99.9	34	78.8	109.4		Peak Found	Peak Found	Peak Found	Peak Found	High	Peak Found	Peak Found	Peak Found	High
O60271	R.SASQSSLDKLDQELK.E	[728-742]	O60271-3 1xPhospho [S]; O60271-5 1xPhospho [S]; O60271-9 1xPhospho [S]; O60271 1xPhospho [S]; O60271-2 1xPhospho [S]; O60271-4 1xPhospho [S]	[R].SASQSSLDKLDQELK.[E]	1xPhospho [S]	Used	1	1728.81	108.8	104.1	104.1	112.7	137.3	130.4	85.9	71	45.8		Peak Found	High	Peak Found	Peak Found	High	Peak Found	Peak Found	Peak Found	Peak Found
O60292	R.RREVSPAPAVAGQSK.G	[1360-1374]	O60292 1xPhospho [S1364]	[R].RREVSPAPAVAGQSK.[G]	1xPhospho [S5]	Used	2	1632.82	30.2	29.5	91	355.8	89.8	93.6	64	43	103.2		Peak Found	Peak Found	Peak Found	High	Peak Found	Peak Found	Peak Found	Peak Found	Peak Found
O60292	R.REVSPAPAVAGQSK.G	[1361-1374]	O60292 1xPhospho [S1364]	[R].REVSPAPAVAGQSK.[G]	1xPhospho [S4]	Used	1	1476.72				195.5	197.3	201.7	69.3	127.4	108.8		Not Found	Not Found	Not Found	High	Peak Found	Peak Found	Peak Found	Peak Found	Peak Found
O60292	R.EVSPAPAVAGQSK.G	[1362-1374]	O60292 1xPhospho [S1364]	[R].EVSPAPAVAGQSK.[G]	1xPhospho [S3]	Used	0	1320.62	20.3	35.8	35.5	182.1	166.4	184.3	89.1	101.9	84.6		Peak Found	Peak Found	High	Peak Found	High	High	High	High	High
O60292	R.SKDVEFQDGWPR.S	[146-157]	O60292 1xPhospho [S146]	[R].SKDVEFQDGWPR.[S]	1xPhospho [S1]	Used	1	1543.66	131.3	54.4	28.6	279.9	194.5	136.9	17.1	31.4	25.9		Peak Found	Peak Found	Peak Found	High	High	Peak Found	Peak Found	Peak Found	Peak Found
O60292	R.TLSDESLCSGR.R	[1542-1552]	O60292 1xPhospho [S1544]	[R].TLSDESLCSGR.[R]	1xCarbamidomethyl [C8]; 1xPhospho [S3]	Used	0	1304.52	39.4	40.8	35.6	183	180.5	185.7	83	79.3	72.8		High	Peak Found	Peak Found	High	High	High	Peak Found	Peak Found	Peak Found
O60292	R.SSSEITLSECDAEDAGEPR.G	[170-188]	O60292 1xPhospho [S]	[R].SSSEITLSECDAEDAGEPR.[G]	1xCarbamidomethyl [C10]; 1xPhospho [S]	Used	0	2132.83		37.6	32.8	217	216.2	225.6		80.3	90.6		Not Found	Peak Found	Peak Found	High	Peak Found	Peak Found	Not Found	Peak Found	High
O60293	R.RISTSDILSEK.K	[350-360]	O60293 1xPhospho [S352]; O60293-2 1xPhospho [S352]	[R].RISTSDILSEK.[K]	1xPhospho [S3]	Used	1	1328.65	87.7	93.2	76.2	67.3	80.1	72.1	109.7	140	173.7		High	High	Peak Found	High	Peak Found	Peak Found	Peak Found	Peak Found	Peak Found
O60293	R.SFLESNYFTKPNLK.H	[1046-1059]	O60293 1xPhospho [S1046]; O60293-2 1xPhospho [S1046]	[R].SFLESNYFTKPNLK.[H]	1xPhospho [S1]	Used	0	1767.84	75.4		97.7	104.2	73.1	78.5	199.1	122.4	149.6		Peak Found	Not Found	Peak Found	Peak Found	Peak Found	Peak Found	High	Peak Found	Peak Found
O60293	R.AFKPEETSSNSDPPSPPVLNNSHPVPR.S	[641-667]	O60293 1xPhospho [S/T]; O60293-2 1xPhospho [S/T]	[R].AFKPEETSSNSDPPSPPVLNNSHPVPR.[S]	1xPhospho [S/T]	Used	0	2980.38	80.1	36.9	71.4	37.8	124.9	33.3	131.5	145	239.1		Peak Found	High	Peak Found	Peak Found	High	Peak Found	High	High	High
O60303	R.VVSPTKEQVSDTEDKQR.M	[451-467]	O60303 1xPhospho [S453]	[R].VVSPTKEQVSDTEDKQR.[M]	1xPhospho [S3]	Used	2	2025.95	99.2	71.7	106	110	129	139.1	62.5	84.4	98		Peak Found	Peak Found	Peak Found	Peak Found	Peak Found	High	Peak Found	Peak Found	Peak Found
O60318	K.KPGDGEVSPSTEDAPFQHSPLGK.A	[520-542]	O60318 1xPhospho [S527]	[K].KPGDGEVSPSTEDAPFQHSPLGK.[A]	1xDeamidated [Q17]; 1xPhospho [S8]	Not Used	0	2461.09										No Quan Values	Not Found	Not Found	Not Found	Not Found	Not Found	Not Found	High	Not Found	Not Found
O60318	K.KPGDGEVSPSTEDAPFQHSPLGK.A	[520-542]	O60318 1xPhospho [S527]	[K].KPGDGEVSPSTEDAPFQHSPLGK.[A]	1xPhospho [S8]	Used	0	2460.11	79.7	97.1	120.9	62.5	84.6	55.6	128.1	117.6	154.1		Peak Found	Peak Found	High	High	High	Peak Found	Peak Found	High	High
O60333	R.SGLSLEELR.I	[1054-1062]	O60333-4 1xPhospho [S1057]; O60333 1xPhospho [S1057]; O60333-2 1xPhospho [S1011]	[R].SGLSLEELR.[I]	1xPhospho [S4]	Used	0	1083.51	70.7	102.7	74.8	166.6	138	151.5	85.4	64.6	45.9		Peak Found	High	High	High	High	High	High	Peak Found	Peak Found
O60333	R.SNSLDQKTPEANSR.A	[1643-1656]	O60333-4 1xPhospho [S1645]; O60333 1xPhospho [S1645]; O60333-2 1xPhospho [S1599]	[R].SNSLDQKTPEANSR.[A]	1xPhospho [S3]	Used	1	1626.71		105	41.2	266.3	250.5	149.2		52.7	35.2		Not Found	Peak Found	Peak Found	Peak Found	High	Peak Found	Not Found	Peak Found	Peak Found
O60341	K.LPPPPPQAPPEEENESEPEEPSGVEGAAFQSR.L	[151-182]	O60341 1xPhospho [S]	[K].LPPPPPQAPPEEENESEPEEPSGVEGAAFQSR.[L]	1xPhospho [S]	Used	0	3478.53		208.1	68.6	6.2	103.6	32.7	183.1	104	193.7		Not Found	High	High	Peak Found	High	Peak Found	High	Peak Found	High
O60341	K.KLPPPPPQAPPEEENESEPEEPSGVEGAAFQSR.L	[150-182]	O60341 1xPhospho [S]	[K].KLPPPPPQAPPEEENESEPEEPSGVEGAAFQSR.[L]	1xPhospho [S]	Used	1	3606.63	65.8	129.6	123.8	52.1	104.8	104.8	99.6	134.1	85.5		High	High	High	Peak Found	High	High	High	High	High
O60341	K.LPPPPPQAPPEEENESEPEEPSGVEGAAFQSR.L	[151-182]	O60341 1xPhospho [S]	[K].LPPPPPQAPPEEENESEPEEPSGVEGAAFQSR.[L]	1xDeamidated [Q/N]; 1xPhospho [S]	Used	0	3479.52			185.2		178.5	252.7			283.5		Not Found	Not Found	Peak Found	High	Peak Found	High	Not Found	Not Found	High
O60341	K.KLPPPPPQAPPEEENESEPEEPSGVEGAAFQSR.L	[150-182]	O60341 1xPhospho [S]	[K].KLPPPPPQAPPEEENESEPEEPSGVEGAAFQSR.[L]	1xDeamidated [N15]; 1xPhospho [S]	Used	1	3607.61		58.6	231.4	110.1		122	189.5	60.3	128.1		Not Found	High	High	High	Not Found	High	Peak Found	High	Peak Found
O60341	K.KLPPPPPQAPPEEENESEPEEPSGVEGAAFQSR.L	[150-182]	O60341 1xPhospho [S166]	[K].KLPPPPPQAPPEEENESEPEEPSGVEGAAFQSR.[L]	2xDeamidated [Q8; N15]; 1xPhospho [S17]	Used	1	3608.6		130.5	186.1		64.4	140	198.5		180.5		Not Found	Peak Found	Peak Found	High	Peak Found	Peak Found	High	Not Found	Peak Found
O60343-2	R.TSSTCSNESLSVGGTSVTPR.R	[686-705]	O60343-1 2xPhospho [S750; S751]; O60343-2 2xPhospho [S687; S688]; O60343-3 2xPhospho [S742; S743]	[R].TSSTCSNESLSVGGTSVTPR.[R]	1xCarbamidomethyl [C5]; 1xDeamidated [N7]; 2xPhospho [S2; S3]	Not Used	0	2187.85										No Quan Values	Not Found	Not Found	Not Found	Not Found	High	Not Found	Not Found	Not Found	Not Found
O60343-2	R.TSSTCSNESLSVGGTSVTPR.R	[686-705]	O60343-1 1xPhospho [T752]; O60343-2 1xPhospho [T689]; O60343-3 1xPhospho [T744]	[R].TSSTCSNESLSVGGTSVTPR.[R]	1xCarbamidomethyl [C5]; 1xDeamidated [N7]; 1xPhospho [T4]	Not Used	0	2107.88										No Quan Values	Not Found	Not Found	Not Found	Not Found	Not Found	High	Not Found	Not Found	Not Found
O60343-2	R.AQGVRSPLLR.Q	[661-670]	O60343-1 1xPhospho [S666]; O60343-2 1xPhospho [S666]; O60343-3 1xPhospho [S666]	[R].AQGVRSPLLR.[Q]	1xPhospho [S6]	Used	1	1176.62	162.2	103.7	107.6	210.6	165.2	146.2		2.3	2.1		High	High	High	High	High	High	Not Found	Peak Found	Peak Found
O60343-2	R.SLTSSLENIFSR.G	[566-577]	O60343-1 1xPhospho [S570]; O60343-2 1xPhospho [S570]; O60343-3 1xPhospho [S570]	[R].SLTSSLENIFSR.[G]	1xPhospho [S5]	Used	0	1433.67	46.6	303.5	179.9	94.3	217.2	58.6					High	High	Peak Found	High	High	Peak Found	Not Found	Not Found	Not Found
O60343-2	R.GRLGSVDSFER.S	[584-594]	O60343-1 1xPhospho [S588]; O60343-2 1xPhospho [S588]; O60343-3 1xPhospho [S588]	[R].GRLGSVDSFER.[S]	1xPhospho [S5]	Used	1	1302.58	213.6	166.5	119.2	120	157.5	123.2					High	High	Peak Found	Peak Found	Peak Found	Peak Found	Not Found	Not Found	Not Found
O60343-2	R.RHASAPSHVQPSDSEK.N	[338-353]	O60343-1 1xPhospho [S341]; O60343-2 1xPhospho [S341]; O60343-3 1xPhospho [S341]	[R].RHASAPSHVQPSDSEK.[N]	1xPhospho [S4]	Used	1	1812.8	900										High	Not Found	Not Found	Not Found	Not Found	Not Found	Not Found	Not Found	Not Found
O60343-2	R.HASAPSHVQPSDSEK.N	[339-353]	O60343-1 1xPhospho [S341]; O60343-2 1xPhospho [S341]; O60343-3 1xPhospho [S341]	[R].HASAPSHVQPSDSEK.[N]	1xPhospho [S3]	Used	0	1656.7	221.6	135.1	86.1	138.6	174.7	143.9					Peak Found	High	High	High	High	High	Not Found	Not Found	Not Found
O60343-2	R.LGSVDSFER.S	[586-594]	O60343-1 1xPhospho [S]; O60343-2 1xPhospho [S]; O60343-3 1xPhospho [S]	[R].LGSVDSFER.[S]	1xPhospho [S]	Used	0	1089.46	150	193.1	96	180	147.8	133.1					High	High	High	High	High	High	Not Found	Not Found	Not Found
O60343-2	R.TSSTCSNESLSVGGTSVTPR.R	[686-705]	O60343-1 2xPhospho [S751; S754]; O60343-2 2xPhospho [S688; S691]; O60343-3 2xPhospho [S743; S746]	[R].TSSTCSNESLSVGGTSVTPR.[R]	1xCarbamidomethyl [C5]; 2xPhospho [S3; S6]	Used	0	2186.87		269.1	178.5	113.5	219.2	119.7					Not Found	High	Peak Found	Peak Found	Peak Found	Peak Found	Not Found	Not Found	Not Found
O60343-2	R.TSSTCSNESLSVGGTSVTPR.R	[686-705]	O60343-1 1xPhospho [T/S]; O60343-2 1xPhospho [T/S]; O60343-3 1xPhospho [T/S]	[R].TSSTCSNESLSVGGTSVTPR.[R]	1xCarbamidomethyl [C5]; 1xPhospho [T/S]	Used	0	2106.9		186.7	148	128.2	222.7	214.4					Not Found	Peak Found	High	Peak Found	High	High	Not Found	Not Found	Not Found
O60343-2	R.SPLLRQSSSEQCSDGEGR.K	[666-683]	O60343-2 3xPhospho [S666; S672; S673]	[R].SPLLRQSSSEQCSDGEGR.[K]	1xCarbamidomethyl [C12]; 3xPhospho [S1; S7; S8]	Used	1	2232.8	900										High	Not Found	Not Found	Not Found	Not Found	Not Found	Not Found	Not Found	Not Found
O60437	K.GKYSPTVQTR.S	[11-20]	O60437 1xPhospho [S14]	[K].GKYSPTVQTR.[S]	1xPhospho [S4]	Used	1	1216.57	87.4	88.2	158.9	111.1	124.5	120.9	47.6	71.7	89.6		Peak Found	High	Peak Found	High	Peak Found	High	Peak Found	Peak Found	Peak Found
O60504-2	-.MADGGSPFLGR.R	[1-11]	O60504-2 1xPhospho [S6]; 1xMet-loss+Acetyl [N-Term]	[-].MADGGSPFLGR.[R]	1xPhospho [S6]; 1xMet-loss+Acetyl [N-Term]	Used	0	1098.46	900										High	Not Found	Not Found	Not Found	Not Found	Not Found	Not Found	Not Found	Not Found
O60504-2	R.HPSSPSALR.S	[200-208]	O60504-1 1xPhospho [S545]; O60504-2 1xPhospho [S203]	[R].HPSSPSALR.[S]	1xPhospho [S4]	Used	0	1031.47	167.9	226.5	201.8	25.3	14.4	12.8	62.3	97.1	91.8		High	High	High	Peak Found	Peak Found	Peak Found	Peak Found	Peak Found	Peak Found
O60504-2	R.GPSHPLDLGTSSPNTSQIHWTPYR.A	[253-276]	O60504-1 1xPhospho [S]; O60504-2 1xPhospho [S]	[R].GPSHPLDLGTSSPNTSQIHWTPYR.[A]	1xPhospho [S]	Used	0	2728.25	182.5	365.3	181.5					39.9	130.8		High	High	High	Not Found	Not Found	Not Found	Not Found	Peak Found	High
O60504-2	R.LRLCDDGPQLPTSPR.L	[176-190]	O60504-1 1xPhospho [T/S]; O60504-2 1xPhospho [T/S]	[R].LRLCDDGPQLPTSPR.[L]	1xCarbamidomethyl [C4]; 1xPhospho [T/S]	Used	1	1804.84	120.5	211.6	214.6	23.8	15.9	18.4	103.9	76.8	114.5		High	High	High	Peak Found	Peak Found	Peak Found	Peak Found	High	Peak Found
O60504-2	R.LCDDGPQLPTSPR.L	[178-190]	O60504-1 1xPhospho [S/T]; O60504-2 1xPhospho [S/T]	[R].LCDDGPQLPTSPR.[L]	1xCarbamidomethyl [C2]; 1xPhospho [S/T]	Used	0	1535.66	164.7	247	193.6	19.7	15.8	14.8	64.8	88.4	91.1		High	High	Peak Found	Peak Found	Peak Found	Peak Found	Peak Found	High	High
O60524	K.LASKEESSNSSDSK.S	[796-809]	O60524-5 1xPhospho [S773]; O60524-4 1xPhospho [S756]; O60524-3 1xPhospho [S777]; O60524 1xPhospho [S798]	[K].LASKEESSNSSDSK.[S]	1xPhospho [S3]	Used	1	1548.64	62.3	358.4	29.4	242	148.2			16	43.6		Peak Found	High	Peak Found	Peak Found	Peak Found	Not Found	Not Found	Peak Found	Peak Found
O60566	K.KNKSPPADPPR.V	[540-550]	O60566-3 1xPhospho [S557]; O60566-2 1xPhospho [S494]; O60566 1xPhospho [S543]	[K].KNKSPPADPPR.[V]	1xPhospho [S4]	Used	2	1286.63	3.4	151	105.9	72.9	83.2	71.1	101.9	169.7	140.9		Peak Found	High	Peak Found	Peak Found	Peak Found	Peak Found	Peak Found	High	High
O60583	K.QGQSQAASSSSVTSPIK.M	[467-483]	O60583-2 1xPhospho [S480]; O60583 1xPhospho [S480]	[K].QGQSQAASSSSVTSPIK.[M]	1xPhospho [S14]	Used	0	1742.8	105	162.1	129	88.3	77.1	63.8	97.9	90.8	86.2		Peak Found	High	High	Peak Found	Peak Found	Peak Found	Peak Found	High	Peak Found
O60658-1	R.RLSGNEYVLSTK.N	[455-466]	O60658-1 1xPhospho [S457]; O60658-6 1xPhospho [S385]; O60658-2 1xPhospho [S411]	[R].RLSGNEYVLSTK.[N]	1xPhospho [S3]	Used	1	1446.7	273.8	164.1	191.3	91.5	106.6		29.7		43		Peak Found	Peak Found	High	Peak Found	Peak Found	Not Found	Peak Found	Not Found	Peak Found
O60664-1	K.ELVSSKVSGAQEMVSSAK.D	[123-140]	O60664-3 1xPhospho [S]; O60664-1 1xPhospho [S]	[K].ELVSSKVSGAQEMVSSAK.[D]	1xPhospho [S]; 1xOxidation [M13]	Used	1	1932.9	747.1	152.9									High	Peak Found	Not Found	Not Found	Not Found	Not Found	Not Found	Not Found	Not Found
O60664-1	K.ELVSSKVSGAQEMVSSAK.D	[123-140]	O60664-3 1xPhospho [S]; O60664-1 1xPhospho [S]	[K].ELVSSKVSGAQEMVSSAK.[D]	1xPhospho [S]	Used	1	1916.9	260.8	335.6	130	56.5	65.1	52					High	Peak Found	High	Peak Found	Peak Found	Peak Found	Not Found	Not Found	Not Found
O60716-1	R.VGGSSVDLHR.F	[265-274]	O60716-10 1xPhospho [S215]; O60716-2 1xPhospho [S269]; O60716-12 1xPhospho [S215]; O60716-8 1xPhospho [S269]; O60716-17 1xPhospho [S168]; O60716-7 1xPhospho [S269]; O60716-13 1xPhospho [S215]; O60716-23 1xPhospho [S168]; O60716-1 1xPhospho [S269]; O60716-3 1xPhospho [S269]; O60716-15 1xPhospho [S215]; O60716-9 1xPhospho [S215]; O60716-4 1xPhospho [S269]; O60716-11 1xPhospho [S215]; O60716-18 1xPh…	[R].VGGSSVDLHR.[F]	1xPhospho [S5]	Used	0	1106.5	68.3	131.2	55.4	178.2	136.2	141.3	43.2	78.4	67.8		Peak Found	High	Peak Found	High	Peak Found	Peak Found	Peak Found	High	Peak Found
O60716-1	K.SLDNNYSTPNER.G	[899-910]	O60716-10 1xPhospho [S839]; O60716-2 1xPhospho [S893]; O60716-26 1xPhospho [S570]; O60716-17 1xPhospho [S798]; O60716-13 1xPhospho [S839]; O60716-1 1xPhospho [S899]; O60716-3 1xPhospho [S899]; O60716-9 1xPhospho [S845]; O60716-27 1xPhospho [S576]; O60716-11 1xPhospho [S845]; O60716-18 1xPhospho [S792]; O60716-19 1xPhospho [S798]; O60716-5 1xPhospho [S893]; O60716-29 1xPhospho [S570]; O60716-25 1x…	[K].SLDNNYSTPNER.[G]	1xPhospho [S1]	Used	0	1489.6			127.7	354.8	197.5	220					Not Found	Not Found	Peak Found	High	Peak Found	Peak Found	Not Found	Not Found	Not Found
O60716-1	R.SQSSHSYDDSTLPLIDR.N	[859-875]	O60716-10 1xPhospho [S]; O60716-2 1xPhospho [S]; O60716-12 1xPhospho [S]; O60716-26 1xPhospho [S]; O60716-8 1xPhospho [S]; O60716-17 1xPhospho [S]; O60716-7 1xPhospho [S]; O60716-13 1xPhospho [S]; O60716-31 1xPhospho [S]; O60716-23 1xPhospho [S]; O60716-1 1xPhospho [S]; O60716-3 1xPhospho [S]; O60716-15 1xPhospho [S]; O60716-30 1xPhospho [S]; O60716-9 1xPhospho [S]; O60716-4 1xPhospho [S]; O60716…	[R].SQSSHSYDDSTLPLIDR.[N]	1xPhospho [S]	Used	0	2000.86	61.7	85.5	92.4	269.5	179.7	175.2	8.4	10	17.6		High	Peak Found	High	High	High	High	Peak Found	Peak Found	Peak Found
O60716-1	R.GSLASLDSLR.K	[345-354]	O60716-10 1xPhospho [S]; O60716-2 1xPhospho [S]; O60716-12 1xPhospho [S]; O60716-26 1xPhospho [S]; O60716-8 1xPhospho [S]; O60716-17 1xPhospho [S]; O60716-7 1xPhospho [S]; O60716-13 1xPhospho [S]; O60716-31 1xPhospho [S]; O60716-23 1xPhospho [S]; O60716-1 1xPhospho [S]; O60716-3 1xPhospho [S]; O60716-15 1xPhospho [S]; O60716-30 1xPhospho [S]; O60716-9 1xPhospho [S]; O60716-4 1xPhospho [S]; O60716…	[R].GSLASLDSLR.[K]	1xPhospho [S]	Used	0	1098.52	53.8	60.8	19.4	225.6	209.1	242.8	12.3	39	37.2		High	High	High	High	High	High	Peak Found	High	High
O60716-1	R.GSLASLDSLRK.G	[345-355]	O60716-10 1xPhospho [S]; O60716-2 1xPhospho [S]; O60716-12 1xPhospho [S]; O60716-26 1xPhospho [S]; O60716-8 1xPhospho [S]; O60716-17 1xPhospho [S]; O60716-7 1xPhospho [S]; O60716-13 1xPhospho [S]; O60716-31 1xPhospho [S]; O60716-23 1xPhospho [S]; O60716-1 1xPhospho [S]; O60716-3 1xPhospho [S]; O60716-15 1xPhospho [S]; O60716-30 1xPhospho [S]; O60716-9 1xPhospho [S]; O60716-4 1xPhospho [S]; O60716…	[R].GSLASLDSLRK.[G]	1xPhospho [S]	Used	1	1226.61	14.5	60.4	24.6	209.5	236	262.3	14.3	37.3	41.1		Peak Found	High	Peak Found	High	High	High	Peak Found	High	High
O60749	K.SMSAPVIFDR.S	[117-126]	O60749 1xPhospho [S119]	[K].SMSAPVIFDR.[S]	1xPhospho [S3]	Used	0	1202.53		76.6	408.1		59.6	109.9	108.9	43.3	93.7		Not Found	Peak Found	High	Not Found	Peak Found	Peak Found	Peak Found	Peak Found	Peak Found
O60762	-.MASLEVSRSPR.R	[1-11]	O60762 1xPhospho [S]; 1xMet-loss+Acetyl [N-Term]	[-].MASLEVSRSPR.[R]	1xPhospho [S]; 1xMet-loss+Acetyl [N-Term]	Used	1	1223.58	96.4	94.3	62.3	152.1	114	124.8	86.7	93.9	75.5		High	High	High	High	High	High	High	High	High
O60762	-.MASLEVSRSPRR.S	[1-12]	O60762 1xPhospho [S]; 1xMet-loss+Acetyl [N-Term]	[-].MASLEVSRSPRR.[S]	1xPhospho [S]; 1xMet-loss+Acetyl [N-Term]	Used	2	1379.68	73.7	86.8	75.6	128.2	119.2	131.5	80.5	107.3	97.1		Peak Found	Peak Found	High	High	High	Peak Found	High	Peak Found	Peak Found
O60763-1	K.LKDLGHPVEEEDELESGDQEDEDDESEDPGKDLDHI.-	[927-962]	O60763-2 1xPhospho [S953]; O60763-1 1xPhospho [S942]	[K].LKDLGHPVEEEDELESGDQEDEDDESEDPGKDLDHI.[-]	1xPhospho [S16]	Used	2	4157.7		216.7	154.6	80.5	221		160.8		66.4		Not Found	Peak Found	Peak Found	Peak Found	Peak Found	Not Found	High	Not Found	Peak Found
O60784	K.AADRLPNLSSPSAEGPPGPPSGPAPR.K	[453-478]	O60784 1xPhospho [S]; O60784-4 1xPhospho [S]; O60784-3 1xPhospho [S]; O60784-2 1xPhospho [S]	[K].AADRLPNLSSPSAEGPPGPPSGPAPR.[K]	1xPhospho [S]	Used	1	2575.23	200	131	129.8	60	27.6	21.3	91.4	112.7	126.2		Peak Found	Peak Found	High	Peak Found	Peak Found	Peak Found	High	Peak Found	High
O60825-1	R.RNSFTPLSSSNTIR.R	[464-477]	O60825-1 1xPhospho [S466]	[R].RNSFTPLSSSNTIR.[R]	1xPhospho [S3]	Used	1	1659.79	66.5	89.2	69.9	126.7	154.6	129.4	52.5	100	111.1		Peak Found	High	High	High	High	High	High	High	High
O60825-1	R.NYSVGSRPLKPLSPLR.A	[481-496]	O60825-1 1xPhospho [S483]	[R].NYSVGSRPLKPLSPLR.[A]	1xPhospho [S3]	Used	0	1863.98	12.6	55.8	55.8	166.1	169.5	126.9	68.3	104.6	140.3		Peak Found	Peak Found	Peak Found	Peak Found	High	Peak Found	Peak Found	High	Peak Found
O60825-1	R.NSFTPLSSSNTIR.R	[465-477]	O60825-1 1xPhospho [S466]	[R].NSFTPLSSSNTIR.[R]	1xPhospho [S2]	Used	0	1503.68	82.2	94.8	55.4	178.4	115.5	140.4	61.8	82.9	88.6		Peak Found	High	High	High	High	High	Peak Found	High	High
O60832-1	R.ESESESDETPPAAPQLIKK.E	[450-468]	O60832-1 1xPhospho [T/S]	[R].ESESESDETPPAAPQLIKK.[E]	1xPhospho [T/S]	Used	1	2135.97	102.1	93.1	123.9	99.3	66.4	52.9	132.5	110.8	118.9		High	Peak Found	High	Peak Found	Peak Found	Peak Found	High	Peak Found	High
O60832-1	K.AGLESGAEPGDGDSDTTKK.K	[481-499]	O60832-1 1xPhospho [S/T]	[K].AGLESGAEPGDGDSDTTKK.[K]	1xPhospho [T/S]	Used	1	1914.8	116.2	84.9	76.2	91.4	107.7	95.8	117.5	110.6	99.7		Peak Found	High	Peak Found	High	High	High	High	High	High
O60832-1	K.AKEVELVSE.-	[506-514]	O60832-1 1xPhospho [S513]	[K].AKEVELVSE.[-]	1xPhospho [S8]	Used	1	1083.5	65.4	69.4	64	91.8	85.1	95.2	189.2	120.8	119		High	High	Peak Found	High	High	High	High	High	High
O60832-1	K.AGLESGAEPGDGDSDTTKKK.K	[481-500]	O60832-1 1xPhospho [S494]	[K].AGLESGAEPGDGDSDTTKKK.[K]	1xPhospho [S14]	Used	2	2042.89	120.2	79.5	99.5	93.2	113.8	102.5	82.7	92.9	115.6		High	Peak Found	High	Peak Found	High	High	Peak Found	High	High
O60832-1	R.ESESESDETPPAAPQLIK.K	[450-467]	O60832-1 1xPhospho [S/T]	[R].ESESESDETPPAAPQLIK.[K]	1xPhospho [S/T]	Used	0	2007.88	98.7	114.9	92.6	123.9	46.4	43.5	158.8	120	101.3		High	High	High	High	Peak Found	Peak Found	High	High	High
O60832-1	K.AGLESGAEPGDGDSDTTK.K	[481-498]	O60832-1 1xPhospho [S/T]	[K].AGLESGAEPGDGDSDTTK.[K]	1xPhospho [S/T]	Used	0	1786.7	167.2	93.7	63.3	40.9	117.3	100.6	135.4	90.8	90.8		High	High	High	High	High	High	High	High	High
O60841	K.NKPGPNIESGNEDDDASFK.I	[206-224]	O60841 1xPhospho [S214]	[K].NKPGPNIESGNEDDDASFK.[I]	1xPhospho [S9]	Used	0	2113.87	90.5	94.2	93.6	85.5	92.5	66.9	133.9	108.8	134		High	High	High	High	High	High	High	High	High
O60841	K.KQSFDDNDSEELEDKDSK.S	[105-122]	O60841 1xPhospho [S113]	[K].KQSFDDNDSEELEDKDSK.[S]	1xPhospho [S9]	Used	2	2208.88	153.1	64.5	95.5	66.3	172.6	71.7	55.8	80	140.4		Peak Found	Peak Found	Peak Found	Peak Found	High	Peak Found	Peak Found	High	High
O60841	K.IEPIPGESPK.M	[1161-1170]	O60841 1xPhospho [S1168]	[K].IEPIPGESPK.[M]	1xPhospho [S8]	Used	0	1146.54	123.1	115.1	100.8	77.5	70.4	81.5	126.2	115.3	90.2		High	High	High	Peak Found	Peak Found	High	High	High	High
O60841	K.KWDGSEEDEDNSKK.I	[160-173]	O60841 1xPhospho [S164]	[K].KWDGSEEDEDNSKK.[I]	1xPhospho [S5]	Used	2	1746.69	114.2	78.3	85.4	98.7	112.7	84.8	62.7	127.4	135.9		High	High	High	Peak Found	High	High	Peak Found	High	Peak Found
O60841	K.KWDGSEEDEDNSK.K	[160-172]	O60841 1xPhospho [S164]	[K].KWDGSEEDEDNSK.[K]	1xPhospho [S5]	Used	1	1618.59	87.4	79.9	64.9	118.7	95.2	86.6	97.5	148.7	121.2		Peak Found	High	High	Peak Found	High	Peak Found	Peak Found	Peak Found	Peak Found
O60841	R.INSSGESGDESDEFLQSR.K	[180-197]	O60841 1xPhospho [S]	[R].INSSGESGDESDEFLQSR.[K]	1xPhospho [S]	Used	0	2036.81	114.9	138.9	126.3	108.5	83.9	94.2	83.2	80	70.1		High	High	High	High	High	High	High	High	High
O60841	K.QSFDDNDSEELEDKDSK.S	[106-122]	O60841 1xPhospho [S]	[K].QSFDDNDSEELEDKDSK.[S]	1xPhospho [S]	Used	1	2080.79	120.9	91.6	115.5	74.6	92.3	70.4	111.7	103	120		High	High	High	Peak Found	High	High	High	High	High
O60885-1	K.MPDEPEEPVVAVSSPAVPPPTK.V	[457-478]	O60885-3 1xPhospho [S470]; O60885-1 1xPhospho [S470]; O60885-2 1xPhospho [S470]	[K].MPDEPEEPVVAVSSPAVPPPTK.[V]	1xPhospho [S14]	Used	0	2353.1		206.1	146	150.4	93.6	53.3		183.5	67.2		Not Found	High	Peak Found	Peak Found	High	Peak Found	Not Found	Peak Found	Peak Found
O60885-1	K.MPDEPEEPVVAVSSPAVPPPTK.V	[457-478]	O60885-3 1xPhospho [S]; O60885-1 1xPhospho [S]; O60885-2 1xPhospho [S]	[K].MPDEPEEPVVAVSSPAVPPPTK.[V]	1xPhospho [S]; 1xOxidation [M1]	Used	0	2369.1			115.7	66.6	30.7	75.9	109.9	287.2	213.9		Not Found	Not Found	Peak Found	Peak Found	Peak Found	Peak Found	High	High	High
O60930	R.KSASPEVSEGHENQHGQESEAK.A	[73-94]	O60930 1xPhospho [S76]	[R].KSASPEVSEGHENQHGQESEAK.[A]	1xPhospho [S4]	Used	1	2445.03	155.2	71	116.8	145.8	85.8	67.3	50.2	108.8	99.1		High	Peak Found	Peak Found	Peak Found	Peak Found	Peak Found	Peak Found	Peak Found	Peak Found
O60930	K.SASPEVSEGHENQHGQESEAK.A	[74-94]	O60930 1xPhospho [S76]	[K].SASPEVSEGHENQHGQESEAK.[A]	1xPhospho [S3]	Used	0	2316.94	175.7	89.5	69.9	81.9	86.6	77.1	99.9	120.7	98.7		High	Peak Found	Peak Found	Peak Found	Peak Found	Peak Found	Peak Found	Peak Found	Peak Found
O60934	R.IPNYQLSPTKLPSINK.S	[426-441]	O60934 1xPhospho [T/S/Y]	[R].IPNYQLSPTKLPSINK.[S]	1xPhospho [Y/T/S]	Used	1	1892.99	53.2	62.3	43	179.9	95.6	88.3	109.6	158.7	109.3		High	High	High	High	High	Peak Found	High	High	High
O75037	R.STDVGFTPPSSPPTRPR.N	[1231-1247]	O75037-2 2xPhospho [T1232; S1241]; O75037-3 2xPhospho [T1232; S1241]; O75037-4 2xPhospho [T1232; S1241]; O75037 2xPhospho [T1232; S1241]	[R].STDVGFTPPSSPPTRPR.[N]	2xPhospho [T2; S11]	Used	0	1958.84			83.8	69.3	56	76.5	186	200.9	227.4		Not Found	Not Found	Peak Found	Peak Found	Peak Found	Peak Found	Peak Found	High	High
O75037	R.ATETSPLTR.R	[1211-1219]	O75037-2 1xPhospho [S1215]; O75037-3 1xPhospho [S1215]; O75037-4 1xPhospho [S1215]; O75037 1xPhospho [S1215]	[R].ATETSPLTR.[R]	1xPhospho [S5]	Used	0	1055.48		68	58.1	90.2	73.2	120.4	123.4	204	162.8		Not Found	Peak Found	Peak Found	Peak Found	Peak Found	Peak Found	Peak Found	High	High
O75037	K.AVSAECLGPPLDISTK.N	[1147-1162]	O75037-2 1xPhospho [S1149]; O75037-3 1xPhospho [S1149]; O75037-4 1xPhospho [S1149]; O75037 1xPhospho [S1149]	[K].AVSAECLGPPLDISTK.[N]	1xCarbamidomethyl [C6]; 1xPhospho [S3]	Used	0	1737.81	84.5	80.3		121		94.7	106.2	196.1	217.1		Peak Found	Peak Found	Not Found	Peak Found	Not Found	Peak Found	Peak Found	High	High
O75069	R.NKFGSADNIAHLK.D	[434-446]	O75069-2 1xPhospho [S360]; O75069 1xPhospho [S438]; O75069-3 1xPhospho [S198]; O75069-5 1xPhospho [S213]; O75069-4 1xPhospho [S107]; Q9ULS5 1xPhospho [S216]	[R].NKFGSADNIAHLK.[DN]	1xPhospho [S5]	Used	1	1494.71	149.7	80.8	146.2	155.6	227.4	140.2					Peak Found	Peak Found	Peak Found	High	High	Peak Found	Not Found	Not Found	Not Found
O75113	R.NKAGTPVSELTK.Q	[238-249]	O75113 1xPhospho [T242]	[R].NKAGTPVSELTK.[Q]	1xPhospho [T5]	Used	1	1324.65	91.4	125.9	85.7	105	117.5	93.4	43.8	116.2	121.1		Peak Found	High	Peak Found	High	Peak Found	Peak Found	Peak Found	High	High
O75113	K.KQFSLENVQEGEILHDAK.T	[297-314]	O75113 1xPhospho [S300]	[K].KQFSLENVQEGEILHDAK.[T]	1xPhospho [S4]	Used	1	2165.03	108.3	124.1	77	109.2	137.4	113.6	77.2	89.2	64		Peak Found	High	Peak Found	High	Peak Found	Peak Found	Peak Found	High	High
O75113	K.RRFSDSEER.H	[285-293]	O75113 1xPhospho [S288]	[K].RRFSDSEER.[H]	1xPhospho [S4]	Used	2	1261.53		109.3	139.3	87.4	99.1	91.5	96.8	136.8	139.8		Not Found	High	High	Peak Found	High	Peak Found	Peak Found	Peak Found	Peak Found
O75113	R.RFSDSEER.H	[286-293]	O75113 1xPhospho [S288]	[R].RFSDSEER.[H]	1xPhospho [S3]	Used	1	1105.43	104.2	110	91.6	66.9	69.6	73.6	98.9	149	136.2		High	High	Peak Found	High	High	High	Peak Found	High	High
O75122	R.SSSSSQESLNRPFSSK.W	[323-338]	O75122-2 1xPhospho [S331]; O75122 1xPhospho [S325]; O75122-3 1xPhospho [S559]	[R].SSSSSQESLNRPFSSK.[W]	1xDeamidated [Q6]; 1xPhospho [S3]	Not Used	0	1808.77										No Quan Values	Not Found	Not Found	Not Found	Not Found	High	Not Found	High	Not Found	Not Found
O75122	K.ASSLPGSLQR.S	[358-367]	O75122-2 1xPhospho [S366]; O75122 1xPhospho [S360]; O75122-3 1xPhospho [S594]	[K].ASSLPGSLQR.[S]	1xPhospho [S3]	Used	0	1095.52	61.1	65.6	58.7	68.8	51.5	72	117	232.6	172.7		Peak Found	Peak Found	Peak Found	Peak Found	Peak Found	Peak Found	High	High	Peak Found
O75122	R.SSSSSQESLNRPFSSK.W	[323-338]	O75122-2 1xPhospho [S]; O75122 1xPhospho [S]; O75122-3 1xPhospho [S]	[R].SSSSSQESLNRPFSSK.[W]	1xPhospho [S]	Used	0	1807.79	66.1		75.8	59.6		64.9	196.3	198.8	238.4		Peak Found	Not Found	High	Peak Found	Not Found	Peak Found	High	High	High
O75122	R.SRSDIDVNAAAGAK.A	[368-381]	O75122-2 1xPhospho [S]; O75122 1xPhospho [S]; O75122-3 1xPhospho [S]	[R].SRSDIDVNAAAGAK.[A]	1xPhospho [S]	Used	1	1454.66	67.1	83.4	59.8	71.4	64.3	65.8	132.3	180.9	175		High	Peak Found	Peak Found	High	Peak Found	Peak Found	High	High	High
O75122	R.IPRPSVSQGCSR.E	[519-530]	O75122 1xPhospho [S]; O75122-3 1xPhospho [S]	[R].IPRPSVSQGCSR.[E]	1xCarbamidomethyl [C10]; 1xPhospho [S]	Used	0	1423.65	84.6	67.8	74.1	53.6	76.5	63.6	152.3	154.6	172.8		High	Peak Found	Peak Found	Peak Found	Peak Found	Peak Found	High	High	High
O75131	R.SSPVEFECINEK.K	[242-253]	O75131 1xPhospho [S243]	[R].SSPVEFECINEK.[K]	1xCarbamidomethyl [C8]; 1xPhospho [S2]	Used	0	1518.62	196.4	215.3	169.7	49.6	33.7	39	69.8	67.3	59.2		High	High	High	Peak Found	Peak Found	Peak Found	Peak Found	Peak Found	Peak Found
O75131	K.EASRSSPVEFECINEK.K	[238-253]	O75131 1xPhospho [S240]	[K].EASRSSPVEFECINEK.[K]	1xCarbamidomethyl [C12]; 1xPhospho [S3]	Used	1	1961.83	291.8	230.1	229.3					68.9	79.8		Peak Found	Peak Found	High	Not Found	Not Found	Not Found	Not Found	Peak Found	Peak Found
O75132	K.TEVSETARPSSPDTR.V	[614-628]	O75132 1xPhospho [T/S]	[K].TEVSETARPSSPDTR.[V]	1xPhospho [T/S]	Used	0	1712.75	103	92.9	91.1	54.5	73.6	60.4	102.2	161.4	160.8		High	Peak Found	Peak Found	Peak Found	Peak Found	Peak Found	Peak Found	High	High
O75145-1	R.GEGPAIPGDTPPPTPR.S	[705-720]	O75145-1 1xPhospho [T714]; O75145-2 1xPhospho [T714]	[R].GEGPAIPGDTPPPTPR.[S]	1xPhospho [T10]	Used	0	1638.75	117.1	161	163.8	90.2	42.1	46.3	103.4	78.4	97.8		High	Peak Found	Peak Found	Peak Found	Peak Found	Peak Found	Peak Found	Peak Found	Peak Found
O75145-1	R.RGSALGPDEAGGELER.L	[15-30]	O75145-1 1xPhospho [S17]; O75145-2 1xPhospho [S17]	[R].RGSALGPDEAGGELER.[L]	1xPhospho [S3]	Used	1	1693.75	268.6	271.5	200.2	60.4				40.2	59.1		High	High	High	Peak Found	Not Found	Not Found	Not Found	Peak Found	Peak Found
O75147	K.ASSGDQGSPPCFLR.F	[3-16]	O75147-4 1xPhospho [S]; O75147-2 1xPhospho [S]; O75147 1xPhospho [S]; O75147-1 1xPhospho [S]	[K].ASSGDQGSPPCFLR.[F]	1xCarbamidomethyl [C11]; 1xPhospho [S]	Used	0	1558.64							345.9	305.8	248.3		Not Found	Not Found	Not Found	Not Found	Not Found	Not Found	Peak Found	High	High
O75151	R.RPSASSPNNNTAAK.G	[1054-1067]	O75151 1xPhospho [S]	[R].RPSASSPNNNTAAK.[G]	1xPhospho [T/S]	Used	0	1494.67	53.7	134.6	53	148.4	105.9	102	70	95.9	136.6		Peak Found	High	Peak Found	Peak Found	Peak Found	Peak Found	Peak Found	Peak Found	High
O75151	K.LEKSPLAGNKDNK.F	[622-634]	O75151 1xPhospho [S625]	[K].LEKSPLAGNKDNK.[F]	1xPhospho [S4]	Used	2	1493.74	900										High	Not Found	Not Found	Not Found	Not Found	Not Found	Not Found	Not Found	Not Found
O75151	R.ESASPTIPNLDLLEAHTK.E	[536-553]	O75151 1xPhospho [S537]	[R].ESASPTIPNLDLLEAHTK.[E]	1xPhospho [S2]	Used	0	2015.97	91.1	109.1	105.5	95.3	74.7	91.1	115.1	108.2	109.8		Peak Found	Peak Found	Peak Found	Peak Found	Peak Found	Peak Found	Peak Found	High	Peak Found
O75151	K.SRESASPTIPNLDLLEAHTK.E	[534-553]	O75151 1xPhospho [S]	[K].SRESASPTIPNLDLLEAHTK.[E]	1xPhospho [S]	Used	1	2259.1	90.6	101.5	109.5	119.2	90.7	78.5	89.1	89.1	131.7		Peak Found	Peak Found	Peak Found	Peak Found	High	Peak Found	High	Peak Found	Peak Found
O75152	R.VQQSSESSTSSPSQHEATPGAR.R	[485-506]	O75152 1xPhospho [S488]	[R].VQQSSESSTSSPSQHEATPGAR.[R]	1xDeamidated [Q3]; 1xPhospho [S4]	Not Used	0	2338.98										No Quan Values	Not Found	Not Found	Not Found	Not Found	Not Found	Not Found	Not Found	High	Not Found
O75152	K.KVEAPETNIDKTPK.K	[310-323]	O75152 1xPhospho [T]	[K].KVEAPETNIDKTPK.[K]	1xPhospho [T]	Used	2	1649.81	122			111.9	194.6	170.4	88.8		212.4		Peak Found	High	Not Found	Peak Found	Peak Found	Peak Found	Peak Found	Not Found	High
O75152	K.TVLPTVPESPEEEVK.A	[100-114]	O75152 1xPhospho [S108]	[K].TVLPTVPESPEEEVK.[A]	1xPhospho [S9]	Used	0	1733.82		95.3	78.9		122.2	132.3		268.5	202.9		Not Found	Peak Found	Peak Found	Not Found	Peak Found	Peak Found	High	Peak Found	High
O75152	R.KFSAGGDSDPPLKR.S	[288-301]	O75152 1xPhospho [S]	[R].KFSAGGDSDPPLKR.[S]	1xPhospho [S]	Used	2	1554.73	163.2	84.9	114.4	93	94	89.5	45.8	91.5	123.7		High	High	High	High	High	High	High	High	High
O75152	R.RLSSASTGKPPLSVEDDFEK.L	[756-775]	O75152 1xPhospho [S]	[R].RLSSASTGKPPLSVEDDFEK.[L]	1xPhospho [S]	Used	1	2243.06	72.9	95.5	77.6	135.7	127.8	85.1	78.8	123.1	103.5		Peak Found	High	Peak Found	High	High	High	High	High	High
O75153	K.SEDPPGQEAGSEEEGSSASGLAK.V	[654-676]	O75153 1xPhospho [S664]	[K].SEDPPGQEAGSEEEGSSASGLAK.[V]	1xPhospho [S11]	Used	0	2298.92		95	87.2	87.6	88	78.9	168.7	157.8	136.7		Not Found	Peak Found	Peak Found	Peak Found	Peak Found	Peak Found	Peak Found	High	Peak Found
O75164-1	R.DSISSDSETSEPLSCR.A	[519-534]	O75164-1 1xPhospho [S]	[R].DSISSDSETSEPLSCR.[A]	1xCarbamidomethyl [C15]; 1xPhospho [S]	Used	0	1849.72		136.4	74.9	70.2	109.5	93.6	149.6	143.2	122.5		Not Found	Peak Found	High	Peak Found	Peak Found	Peak Found	High	Peak Found	Peak Found
O75167	K.ASIANSDGPTAGSQTPPFKR.K	[11-30]	O75167-2 1xPhospho [T/S]; O75167-4 1xPhospho [T/S]; O75167-5 1xPhospho [T/S]; O75167 1xPhospho [T/S]	[K].ASIANSDGPTAGSQTPPFKR.[K]	1xPhospho [T/S]	Used	1	2081.97	92	50.9	54.1	127.1	127.2	124.3	94.4	107.1	122.9		Peak Found	High	Peak Found	High	Peak Found	Peak Found	High	Peak Found	Peak Found
O75167	K.ASASPSTSSTSSRPK.A	[234-248]	O75167-2 1xPhospho [S166]; O75167-4 1xPhospho [S246]; O75167-5 1xPhospho [S155]; O75167 1xPhospho [S235]	[K].ASASPSTSSTSSRPK.[A]	1xPhospho [S2]	Used	0	1530.68	63.9	130.8	69.7		68.1		138.5	162.3	266.8		Peak Found	Peak Found	Peak Found	Not Found	Peak Found	Not Found	Peak Found	Peak Found	High
O75179-1	K.SGPSPLSSPNGK.L	[1693-1704]	O75179-1 1xPhospho [S1699]; O75179-4 1xPhospho [S1106]; O75179-7 1xPhospho [S1586]; O75179-6 1xPhospho [S1448]; O75179-2 1xPhospho [S1698]	[K].SGPSPLSSPNGK.[L]	1xPhospho [S7]	Used	0	1207.54	44.9	70.3	48.3	62.7	75.9	105.6	193.5	173.2	125.7		Peak Found	Peak Found	Peak Found	Peak Found	Peak Found	Peak Found	Peak Found	High	Peak Found
O75179-1	R.APSPAPSSVPLGSEKPSNVSQDR.K	[2399-2421]	O75179-1 1xPhospho [S2401]; O75179-4 1xPhospho [S1808]; O75179-7 1xPhospho [S2288]; O75179-6 1xPhospho [S2150]; O75179-2 1xPhospho [S2400]	[R].APSPAPSSVPLGSEKPSNVSQDR.[K]	1xPhospho [S3]	Used	0	2387.12	74.2	153.2	124	95.9	111.8	116.1	110.2	54.4	60.2		Peak Found	Peak Found	High	High	High	High	Peak Found	High	High
O75179-1	K.EHYPVSSPSSPSPPAQPGGVSR.N	[2036-2057]	O75179-1 1xPhospho [S]; O75179-4 1xPhospho [S]; O75179-7 1xPhospho [S]; O75179-6 1xPhospho [S]; O75179-2 1xPhospho [S]	[K].EHYPVSSPSSPSPPAQPGGVSR.[N]	1xPhospho [S]	Used	0	2300.03	38.6	84.7	94.3	106.1	100.2	103.3	129.6	112.5	130.6		High	High	Peak Found	Peak Found	High	High	High	Peak Found	Peak Found
O75182-1	R.KKPAPGPHSSPPEEK.G	[731-745]	O75182-2 1xPhospho [S707]; O75182-1 1xPhospho [S739]	[R].KKPAPGPHSSPPEEK.[G]	1xPhospho [S9]	Used	1	1665.8	809		40.8				50.2				High	Not Found	Peak Found	Not Found	Not Found	Not Found	Peak Found	Not Found	Not Found
O75190	R.HAPHCLSEEEGEQDRPR.A	[271-287]	O75190 1xPhospho [S277]; O75190-4 1xPhospho [S228]; O75190-3 1xPhospho [S277]	[R].HAPHCLSEEEGEQDRPR.[A]	1xCarbamidomethyl [C5]; 1xPhospho [S7]	Used	0	2126.87	218.8	71.8	182.4	53.7	83.3	27	31	46.3	185.6		High	Peak Found	Peak Found	Peak Found	Peak Found	Peak Found	Peak Found	Peak Found	High
O75351	K.EGQPSPADEKGNDSDGEGESDDPEK.K	[89-113]	O75351 1xPhospho [S102]	[K].EGQPSPADEKGNDSDGEGESDDPEK.[K]	1xPhospho [S14]	Used	1	2669	111	131.5	81.6	139.1	186.3	115.1	47.6	47.6	40.1		Peak Found	Peak Found	Peak Found	Peak Found	High	High	Peak Found	Peak Found	Peak Found
O75351	K.EGQPSPADEKGNDSDGEGESDDPEKK.K	[89-114]	O75351 1xPhospho [S102]	[K].EGQPSPADEKGNDSDGEGESDDPEKK.[K]	1xPhospho [S14]	Used	2	2797.1	128.6	71.8	131	109.9	173.9	145.9	37.8	48.8	52.4		Peak Found	Peak Found	Peak Found	Peak Found	Peak Found	High	Peak Found	Peak Found	Peak Found
O75351	K.GNDSDGEGESDDPEKKK.L	[99-115]	O75351 1xPhospho [S]	[K].GNDSDGEGESDDPEKKK.[L]	1xPhospho [S]	Used	2	1886.73	80.1	143.6	46.5	211.9	135.2	143.5	42.7	43	53.5		Peak Found	High	Peak Found	High	Peak Found	High	Peak Found	Peak Found	High
O75363	K.SVKEDSVPTGAEENVVCESPVEIIK.S	[381-405]	O75363 1xPhospho [S399]	[K].SVKEDSVPTGAEENVVCESPVEIIK.[S]	1xCarbamidomethyl [C17]; 1xDeamidated [N14]; 1xPhospho [S19]	Not Used	1	2796.29										No Quan Values	Not Found	Not Found	Not Found	Not Found	High	Not Found	Not Found	Not Found	Not Found
O75369-8	R.ADDTDSQSWRSPLK.A	[1464-1477]	O75369-8 1xPhospho [S1474]	[R].ADDTDSQSWRSPLK.[A]	1xPhospho [S11]	Used	1	1685.72	74.4	55.4		192.2	219.6	164.9		87.8	105.7		Peak Found	Peak Found	Not Found	Peak Found	High	Peak Found	Not Found	Peak Found	Peak Found
O75369-8	R.LVSPGSANETSSILVESVTR.S	[2507-2526]	O75369-9 1xPhospho [S]; O75369-2 1xPhospho [S]; O75369-8 1xPhospho [S]; O75369-7 1xPhospho [S]; O75369-6 1xPhospho [S]; O75369-1 1xPhospho [S]; O75369-3 1xPhospho [S]	[R].LVSPGSANETSSILVESVTR.[S]	1xPhospho [S]	Used	0	2126.04	77.9	146.9	105.4	183.8	175.3	183.8			26.9		Peak Found	High	Peak Found	Peak Found	High	Peak Found	Not Found	Not Found	Peak Found
O75369-8	R.APSVATVGSICDLNLK.I	[2136-2151]	O75369-9 1xPhospho [S2096]; O75369-5 1xPhospho [S2107]; O75369-2 1xPhospho [S2083]; O75369-8 1xPhospho [S2138]; O75369-7 1xPhospho [S1927]; O75369-4 1xPhospho [S2107]; O75369-1 1xPhospho [S2107]	[R].APSVATVGSICDLNLK.[I]	1xCarbamidomethyl [C11]; 1xPhospho [S3]	Used	0	1724.83	216	155.8	90.1	134.5	83.7	90.4	38.2	52.8	38.5		High	Peak Found	Peak Found	Peak Found	Peak Found	Peak Found	Peak Found	Peak Found	Peak Found
O75376-1	R.SHVSSEPYEPISPPQVPVVHEK.Q	[2140-2161]	O75376-1 1xPhospho [S2151]; O75376-2 1xPhospho [S2048]	[R].SHVSSEPYEPISPPQVPVVHEK.[Q]	1xDeamidated [Q15]; 1xPhospho [S12]	Not Used	0	2523.18										No Quan Values	Not Found	Not Found	Not Found	Not Found	Not Found	Not Found	Not Found	Not Found	High
O75376-1	K.AQLSPGIYDDTSAR.R	[1469-1482]	O75376-1 1xPhospho [S1472]; O75376-2 1xPhospho [S1488]	[K].AQLSPGIYDDTSAR.[R]	1xPhospho [S4]	Used	0	1573.69	6		5.6	103	82.1	128.8	194.6	200.5	179.5		Peak Found	Not Found	Peak Found	High	Peak Found	Peak Found	Peak Found	Peak Found	Peak Found
O75376-1	R.VSPENLVDK.S	[2119-2127]	O75376-1 1xPhospho [S2120]; O75376-2 1xPhospho [S2017]	[R].VSPENLVDK.[S]	1xPhospho [S2]	Used	0	1080.5		8.3		147.5	74.9	99.6	218.6	224.2	126.9		Not Found	Peak Found	Not Found	High	Peak Found	Peak Found	Peak Found	Peak Found	Peak Found
O75376-1	R.SPGSISYLPSFFTK.L	[2184-2197]	O75376-1 1xPhospho [S2184]; O75376-2 1xPhospho [S2081]	[R].SPGSISYLPSFFTK.[L]	1xPhospho [S1]	Used	0	1610.75				172.9	148.5	164.3		221.5	192.7		Not Found	Not Found	Not Found	Peak Found	High	Peak Found	Not Found	Peak Found	Peak Found
O75376-1	R.SHVSSEPYEPISPPQVPVVHEK.Q	[2140-2161]	O75376-1 1xPhospho [S/Y]; O75376-2 1xPhospho [S/Y]	[R].SHVSSEPYEPISPPQVPVVHEK.[Q]	1xPhospho [S/Y]	Used	0	2522.2				121.9	112.4	80.9	228.9	177.4	178.5		Not Found	Not Found	Not Found	High	Peak Found	Peak Found	High	High	High
O75376-1	K.HEAPSSPISGQPCGDDQNASPSK.L	[153-175]	O75376-1 1xPhospho [S]; O75376-2 1xPhospho [S]; O75376-3 1xPhospho [S]	[K].HEAPSSPISGQPCGDDQNASPSK.[L]	1xCarbamidomethyl [C13]; 1xPhospho [S]	Used	0	2446	22.5	12.7	13.9	120	192.6	146.9	112.4	135.9	143.1		Peak Found	Peak Found	Peak Found	Peak Found	Peak Found	Peak Found	Peak Found	High	High
O75382-1	K.REDSPGPEVQPMDK.Q	[4-17]	O75382-2 1xPhospho [S7]; O75382-3 1xPhospho [S7]; O75382-1 1xPhospho [S7]	[K].REDSPGPEVQPMDK.[Q]	1xPhospho [S4]	Used	1	1664.7	34.7	105.5	139	258.4	251.4	66.6	10.4	15.5	18.4		Peak Found	Peak Found	Peak Found	High	High	Peak Found	Peak Found	Peak Found	Peak Found
O75385	R.NLQSPTQFQTPR.S	[447-458]	O75385 1xPhospho [S450]	[R].NLQSPTQFQTPR.[S]	1xPhospho [S4]	Used	0	1496.69	134.1	140.5	160	91.3	120.2	128.4		71	54.4		Peak Found	High	Peak Found	Peak Found	Peak Found	Peak Found	Not Found	Peak Found	Peak Found
O75387	R.LSQKAPSLEDGSDAFMSPQDVR.G	[261-282]	O75387 1xPhospho [S272]; O75387-2 1xPhospho [S272]	[R].LSQKAPSLEDGSDAFMSPQDVR.[G]	1xDeamidated [Q3]; 1xPhospho [S12]	Not Used	1	2459.08										No Quan Values	Not Found	Not Found	Not Found	High	Not Found	Not Found	Not Found	Not Found	Not Found
O75387	K.APSLEDGSDAFMSPQDVR.G	[265-282]	O75387 1xPhospho [S267]; O75387-2 1xPhospho [S267]	[K].APSLEDGSDAFMSPQDVR.[G]	1xPhospho [S3]	Used	0	2001.83				365.1	300.7	234.2					Not Found	Not Found	Not Found	Peak Found	High	Peak Found	Not Found	Not Found	Not Found
O75396	R.RNLGSINTELQDVQR.I	[133-147]	O75396 1xPhospho [S137]	[R].RNLGSINTELQDVQR.[I]	1xPhospho [S5]	Used	1	1822.88	263.3	377.3	259.4								High	High	High	Not Found	Not Found	Not Found	Not Found	Not Found	Not Found
O75396	R.NLGSINTELQDVQR.I	[134-147]	O75396 1xPhospho [S/T]	[R].NLGSINTELQDVQR.[I]	1xPhospho [S/T]	Used	0	1666.78	286.5	330.8	142.3	48.4	40.3	3	7.3	17.8	23.6		High	High	Peak Found	Peak Found	Peak Found	Peak Found	Peak Found	Peak Found	Peak Found
O75398	K.GPAAPLTPGPQSPPTPLAPGQEK.G	[165-187]	O75398-3 1xPhospho [T157]; O75398-5 1xPhospho [T171]; O75398 1xPhospho [T171]; O75398-4 1xPhospho [T103]	[K].GPAAPLTPGPQSPPTPLAPGQEK.[G]	1xPhospho [T7]	Used	0	2288.13		104.7	86.5	55.7	120.7	39.7	190.6	148.9	153.3		Not Found	Peak Found	Peak Found	Peak Found	Peak Found	Peak Found	Peak Found	High	Peak Found
O75400	R.HKSDSPESDAEREK.D	[881-894]	O75400-2 2xPhospho [S858; S861]; O75400-3 2xPhospho [S867; S870]; O75400 2xPhospho [S885; S888]	[R].HKSDSPESDAEREK.[D]	2xPhospho [S5; S8]	Used	2	1774.67	125.9	124.9	110.9	79.8	109.9	65.8	89.5	122.8	70.6		High	High	High	High	High	High	High	High	High
O75400	K.SDSPESDAEREK.D	[883-894]	O75400-2 1xPhospho [S861]; O75400-3 1xPhospho [S870]; O75400 1xPhospho [S888]	[K].SDSPESDAEREK.[D]	1xPhospho [S6]	Used	1	1429.55	106.1	136.7	83.1	105.2	121.3	99.5	81.8	101.4	64.9		Peak Found	High	Peak Found	High	Peak Found	Peak Found	Peak Found	Peak Found	Peak Found
O75400	K.DSGNWDTSGSELSEGELEK.R	[926-944]	O75400-2 1xPhospho [S911]; O75400-3 1xPhospho [S920]; O75400 1xPhospho [S938]	[K].DSGNWDTSGSELSEGELEK.[R]	1xPhospho [S13]	Used	0	2119.83	900										High	Not Found	Not Found	Not Found	Not Found	Not Found	Not Found	Not Found	Not Found
O75400	R.HKSDSPESDAEREK.D	[881-894]	O75400-2 1xPhospho [S]; O75400-3 1xPhospho [S]; O75400 1xPhospho [S]	[R].HKSDSPESDAEREK.[D]	1xPhospho [S]	Used	2	1694.7	127.8	56.2	99.2	168	155.3	93.7	25.9	96.8	77.1		High	Peak Found	High	High	High	High	Peak Found	High	High
O75400	K.DSGNWDTSGSELSEGELEKR.R	[926-945]	O75400-2 1xPhospho [S]; O75400-3 1xPhospho [S]; O75400 1xPhospho [S]	[K].DSGNWDTSGSELSEGELEKR.[R]	1xPhospho [S]	Used	1	2275.94	137.2	119.1	99.7	124.8	125.3	123.3	43.1	77.6	50.1		High	High	High	High	High	Peak Found	High	High	High
O75420	R.SLSVPDSGR.L	[636-644]	O75420 1xPhospho [S638]	[R].SLSVPDSGR.[L]	1xPhospho [S3]	Used	0	997.435	3.8	87.1	38.8	212.3	100.7	141.3	79.3	139.6	97.1		Peak Found	High	High	High	High	High	High	High	High
O75427	-.MAAAVAAPLAAGGEEAAATTSVPGSPGLPGRR.S	[1-32]	O75427 1xPhospho [T/S]; 1xMet-loss+Acetyl [N-Term]	[-].MAAAVAAPLAAGGEEAAATTSVPGSPGLPGRR.[S]	1xPhospho [T/S]; 1xMet-loss+Acetyl [N-Term]	Used	1	2895.44				413		161.3		150.7	175		High	Not Found	Not Found	High	Not Found	Peak Found	Not Found	Peak Found	Peak Found
O75427	R.SSSQSGSGPSSPDSVLRPR.R	[511-529]	O75427 1xPhospho [S521]	[R].SSSQSGSGPSSPDSVLRPR.[R]	1xPhospho [S11]	Used	0	1967.88	113.4	115.5	110.8	141.6	117.3	124.8	72		104.5		Peak Found	High	Peak Found	Peak Found	Peak Found	Peak Found	Peak Found	Not Found	Peak Found
O75448	R.LLSSNEDDANILSSPTDR.S	[860-877]	O75448-2 1xPhospho [S849]; O75448 1xPhospho [S862]	[R].LLSSNEDDANILSSPTDR.[S]	1xDeamidated [N5]; 1xPhospho [S3]	Not Used	0	2027.88										No Quan Values	High	Not Found	Not Found	Not Found	Not Found	Not Found	Not Found	Not Found	Not Found
O75448	R.LLSSNEDDANILSSPTDR.S	[860-877]	O75448-2 1xPhospho [S]; O75448 1xPhospho [S]	[R].LLSSNEDDANILSSPTDR.[S]	1xPhospho [S]	Used	0	2026.9	98.1	132.6	74.2	95.6	78.5	78.2	119.4	121.3	102.1		Peak Found	High	High	High	High	High	High	High	High
O75475-1	K.TGVTSTSDSEEEGDDQEGEKKR.K	[267-288]	O75475-3 1xPhospho [S275]; O75475-2 1xPhospho [S275]; O75475-1 1xPhospho [S275]	[K].TGVTSTSDSEEEGDDQEGEKKR.[K]	1xDeamidated [Q16]; 1xPhospho [S9]	Not Used	2	2464.98										No Quan Values	Not Found	Not Found	Not Found	Not Found	Not Found	Not Found	Not Found	High	High
O75475-1	K.TGVTSTSDSEEEGDDQEGEKKR.K	[267-288]	O75475-3 2xPhospho [S/T]; O75475-2 2xPhospho [S/T]; O75475-1 2xPhospho [S/T]	[K].TGVTSTSDSEEEGDDQEGEKKR.[K]	2xPhospho [T/S]	Used	2	2543.97	103.7	105.2	156.4	129.6	129.8	79.2	52.2	81.1	62.8		High	High	High	Peak Found	High	Peak Found	Peak Found	Peak Found	High
O75475-1	K.QSNASSDVEVEEKETSVSKEDTDHEEK.A	[101-127]	O75475-3 1xPhospho [T115]; O75475-2 1xPhospho [T115]; O75475-1 1xPhospho [T115]	[K].QSNASSDVEVEEKETSVSKEDTDHEEK.[A]	1xPhospho [T15]	Used	2	3116.31	304.3	36.9		48.6	161	69.3	39.3	104	136.6		High	Peak Found	Not Found	Peak Found	Peak Found	Peak Found	Peak Found	Peak Found	Peak Found
O75475-1	K.TGVTSTSDSEEEGDDQEGEKK.R	[267-287]	O75475-3 1xPhospho [T/S]; O75475-2 1xPhospho [T/S]; O75475-1 1xPhospho [T/S]	[K].TGVTSTSDSEEEGDDQEGEKK.[R]	1xPhospho [T/S]	Used	1	2307.9	258.5	115.6	112.7	56.9	71.7	93.7	63.7	72.4	54.8		High	High	High	Peak Found	High	High	Peak Found	Peak Found	High
O75475-1	K.ETSVSKEDTDHEEKASNEDVTK.A	[114-135]	O75475-3 1xPhospho [S129]; O75475-2 1xPhospho [S129]; O75475-1 1xPhospho [S129]	[K].ETSVSKEDTDHEEKASNEDVTK.[A]	1xPhospho [S16]	Used	2	2558.08	256.1	135.6	127.4	96	104.8	91.4			88.9		High	Peak Found	Peak Found	Peak Found	Peak Found	Peak Found	Not Found	Not Found	Peak Found
O75475-1	K.QSNASSDVEVEEK.E	[101-113]	O75475-3 1xPhospho [S]; O75475-2 1xPhospho [S]; O75475-1 1xPhospho [S]	[K].QSNASSDVEVEEK.[E]	1xPhospho [S]	Used	0	1501.61	143.9	115.1	78.6	90.1	91.9	86.3	97.5	104.8	91.7		High	Peak Found	Peak Found	High	Peak Found	Peak Found	Peak Found	Peak Found	High
O75475-1	K.TGVTSTSDSEEEGDDQEGEKKR.K	[267-288]	O75475-3 1xPhospho [S/T]; O75475-2 1xPhospho [S/T]; O75475-1 1xPhospho [S/T]	[K].TGVTSTSDSEEEGDDQEGEKKR.[K]	1xPhospho [S/T]	Used	2	2464	154.6	129.8	161.4	58.1	97.8	84.4	61.1	75.2	77.6		High	High	High	High	High	High	High	High	Peak Found
O75475-1	K.TGVTSTSDSEEEGDDQEGEK.K	[267-286]	O75475-3 1xPhospho [S/T]; O75475-2 1xPhospho [S/T]; O75475-1 1xPhospho [S/T]	[K].TGVTSTSDSEEEGDDQEGEK.[K]	1xPhospho [S/T]	Used	0	2179.8		184.5	151.2	45.5	105.6	120.1	123.7	96.3	73.1		Not Found	High	High	Peak Found	Peak Found	High	Peak Found	Peak Found	High
O75494-1	R.SRSFDYNYR.R	[131-139]	O75494-4 1xPhospho [S133]; O75494-2 1xPhospho [S133]; O75494-5 1xPhospho [S133]; O75494-6 1xPhospho [S133]; O75494-1 1xPhospho [S133]; O75494-3 1xPhospho [S133]	[R].SRSFDYNYR.[R]	1xPhospho [S3]	Used	1	1287.52	183.3	104	117.1	83.1	85	58.2	102.4	80.4	86.4		Peak Found	High	High	Peak Found	Peak Found	Peak Found	Peak Found	Peak Found	High
O75494-1	R.SFDYNYR.R	[133-139]	O75494-4 1xPhospho [S133]; O75494-2 1xPhospho [S133]; O75494-5 1xPhospho [S133]; O75494-6 1xPhospho [S133]; O75494-1 1xPhospho [S133]; O75494-3 1xPhospho [S133]	[R].SFDYNYR.[R]	1xPhospho [S1]	Used	0	1044.38	125	124.5	87	75.7	81	65.7	134.4	118.3	88.4		High	High	Peak Found	High	High	Peak Found	High	High	High
O75508	R.FYYTAGSSSPTHAK.S	[190-203]	O75508 1xPhospho [S/T]	[R].FYYTAGSSSPTHAK.[S]	1xPhospho [S/T]	Used	0	1596.67							219.7	329.9	350.4		Not Found	Not Found	Not Found	Not Found	Not Found	Not Found	Peak Found	High	High
O75531	-.MTTSQKHRDFVAEPMGEKPVGSLAGIGEVLGK.K	[1-32]	O75531 2xPhospho [T2; T3]; 1xMet-loss+Acetyl [N-Term]	[-].MTTSQKHRDFVAEPMGEKPVGSLAGIGEVLGK.[K]	2xPhospho [T2; T3]; 1xMet-loss+Acetyl [N-Term]	Used	2	3440.63							900				Not Found	Not Found	Not Found	Not Found	Not Found	Not Found	High	Not Found	Not Found
O75533-1	K.LLVDVDESTLSPEEQKER.K	[478-495]	O75533-1 1xPhospho [S488]	[K].LLVDVDESTLSPEEQKER.[K]	1xPhospho [S11]	Used	1	2167.02	110	96.6	80.6	56.4	51.2	63.9	166.7	147.1	127.5		Peak Found	Peak Found	Peak Found	Peak Found	Peak Found	Peak Found	Peak Found	High	Peak Found
O75569-1	R.EDSGTFSLGK.M	[16-25]	O75569-1 1xPhospho [T/S]	[R].EDSGTFSLGK.[M]	1xPhospho [T/S]	Used	0	1120.46	159.7	126.2	76.9	119.9	91	95.4	65.7	87.6	77.7		High	High	Peak Found	High	High	High	High	High	High
O75569-1	R.AEAPPLEREDSGTFSLGK.M	[8-25]	O75569-1 1xPhospho [T/S]	[R].AEAPPLEREDSGTFSLGK.[M]	1xPhospho [S/T]	Used	1	1983.91	149.5	149.3	60	132.8	48.9	120.1	57.8	91.6	89.9		Peak Found	High	High	High	Peak Found	High	High	Peak Found	High
O75592-1	R.HEDEQALLDQNSQTPPPSPFSVQAFNK.G	[2632-2658]	O75592-1 1xPhospho [T2645]; O75592-2 1xPhospho [T2645]	[R].HEDEQALLDQNSQTPPPSPFSVQAFNK.[G]	2xDeamidated [Q10; Q13]; 1xPhospho [T14]	Not Used	0	3106.37										No Quan Values	Not Found	Not Found	High	Not Found	Not Found	Not Found	Not Found	Not Found	Not Found
O75592-1	R.HEDEQALLDQNSQTPPPSPFSVQAFNK.G	[2632-2658]	O75592-1 1xPhospho [T2645]; O75592-2 1xPhospho [T2645]	[R].HEDEQALLDQNSQTPPPSPFSVQAFNK.[G]	1xPhospho [T14]	Used	0	3104.4	35.4	70.2	121.2	31.2	108.4	37.7	319.4	85.8	90.6		High	Peak Found	Peak Found	Peak Found	Peak Found	Peak Found	High	High	High
O75592-1	R.SSSPHDKNLPQK.S	[2804-2815]	O75592-1 1xPhospho [S2806]; O75592-2 1xPhospho [S2806]	[R].SSSPHDKNLPQK.[S]	1xPhospho [S3]	Used	1	1417.65	52.3	80.3	69.6	107	48.4	63.5	108.6	211.3	158.9		Peak Found	High	Peak Found	High	Peak Found	Peak Found	Peak Found	Peak Found	High
O75592-1	K.QVSTENDSTLVHR.F	[1584-1596]	O75592-1 1xPhospho [S]; O75592-2 1xPhospho [S]	[K].QVSTENDSTLVHR.[F]	1xPhospho [S]	Used	0	1565.7	114.6	81.6	60.4	99.5	94	86.9	124.7	122.9	115.3		Peak Found	Peak Found	Peak Found	Peak Found	High	Peak Found	High	Peak Found	High
O75592-1	R.SKSDSYTLDPDTLR.K	[2831-2844]	O75592-1 1xPhospho [S/Y]; O75592-2 1xPhospho [S/Y]	[R].SKSDSYTLDPDTLR.[K]	1xPhospho [S/Y/T]	Used	1	1677.74	22.8	97.6	104.6	74.2	39.9	44.4	155.4	184.6	176.6		Peak Found	Peak Found	High	Peak Found	Peak Found	Peak Found	Peak Found	High	High
O75592-1	R.VNSGDTEVGSSLLR.H	[3465-3478]	O75592-1 1xPhospho [S/T]; O75592-2 1xPhospho [S/T]	[R].VNSGDTEVGSSLLR.[H]	1xPhospho [S/T]	Used	0	1513.69	67.7	90.4	59.5	70.9	40.2	42	189.7	178.3	161.2		High	High	High	High	High	High	High	Peak Found	High
O75592-1	R.RVNSGDTEVGSSLLR.H	[3464-3478]	O75592-1 1xPhospho [S/T]; O75592-2 1xPhospho [S/T]	[R].RVNSGDTEVGSSLLR.[H]	1xPhospho [S/T]	Used	1	1669.79	36.5	94.1	68.6	45.3	72.1	42.7	152.9	178.8	208.9		High	Peak Found	High	High	High	Peak Found	High	High	High
O75592-1	R.SLSPNHNTLQTLK.S	[2749-2761]	O75592-1 1xPhospho [S/T]; O75592-2 1xPhospho [S/T]	[R].SLSPNHNTLQTLK.[S]	1xPhospho [S/T]	Used	0	1532.75	74.4	79.7	72.1	83	41.8	55.2	158.7	165.9	169.3		High	High	High	Peak Found	Peak Found	Peak Found	High	High	High
O75592-1	R.VNSGDTEVGSSLLR.H	[3465-3478]	O75592-1 1xPhospho [T3470]; O75592-2 1xPhospho [T3470]	[R].VNSGDTEVGSSLLR.[H]	1xDeamidated [N2]; 1xPhospho [T6]	Used	0	1514.67			50				315.3	259.2	275.5		Not Found	Not Found	Peak Found	Not Found	Not Found	Not Found	High	Peak Found	Peak Found
O75643-1	R.EEASDDDMEGDEAVVR.C	[222-237]	O75643-2 1xPhospho [S225]; O75643-1 1xPhospho [S225]	[R].EEASDDDMEGDEAVVR.[C]	1xPhospho [S4]; 1xOxidation [M8]	Used	0	1862.66	79.2	92.1	71	39.3	72.1	60.5	211.1	126.1	148.5		High	High	High	High	High	Peak Found	High	High	High
O75643-1	R.EEASDDDMEGDEAVVR.C	[222-237]	O75643-2 1xPhospho [S225]; O75643-1 1xPhospho [S225]	[R].EEASDDDMEGDEAVVR.[C]	1xPhospho [S4]	Used	0	1846.67	137.6	223.2	109.2	91	100.3	37	82.4	69	50.2		High	High	High	High	High	Peak Found	High	High	High
O75674	K.EATNTTSEPSAPSQDLLDLSPSPR.M	[302-325]	O75674 1xPhospho [S]; O75674-2 1xPhospho [S]; O75674-3 1xPhospho [S]	[K].EATNTTSEPSAPSQDLLDLSPSPR.[M]	1xPhospho [S]	Used	0	2593.17	32.2	45.4	57.5	207.1	187.9	203.5	49.3	57.1	59.9		High	High	High	High	High	High	High	High	High
O75676	R.SSPPLRTPDVLESSGPAVR.S	[681-699]	O75676 2xPhospho [S681; S682]; O75676-2 2xPhospho [S675; S676]	[R].SSPPLRTPDVLESSGPAVR.[S]	2xPhospho [S1; S2]	Used	1	2124.97	45.9	71.1	61.4	154.7	172	144.6	81.6	76.7	91.9		Peak Found	High	Peak Found	High	High	High	Peak Found	Peak Found	High
O75676	R.SSPPLRTPDVLESSGPAVR.S	[681-699]	O75676 1xPhospho [T/S]; O75676-2 1xPhospho [T/S]	[R].SSPPLRTPDVLESSGPAVR.[S]	1xPhospho [T/S]	Used	1	2045.01	44	55.6	21.9	193.2	141.3	181	58.4	114.6	90.2		Peak Found	High	High	High	High	High	High	High	High
O75676	R.RGSPAPANPGR.A	[743-753]	O75676 1xPhospho [S745]; O75676-2 1xPhospho [S739]	[R].RGSPAPANPGR.[A]	1xPhospho [S3]	Used	1	1159.54				362.8	280.4	256.8					Not Found	Not Found	Not Found	High	Peak Found	Peak Found	Not Found	Not Found	Not Found
O75676	R.LEPVYSPPGSPPPGDPR.I	[338-354]	O75676 1xPhospho [S/Y]; O75676-2 1xPhospho [S/Y]	[R].LEPVYSPPGSPPPGDPR.[I]	1xPhospho [S/Y]	Used	0	1841.85	43.6	67	48.3	216.1	188.1	155.4	64.3	66.3	51		High	Peak Found	Peak Found	High	High	Peak Found	Peak Found	High	Peak Found
O75683	K.SLGEKSPAASGAR.R	[69-81]	O75683 1xPhospho [S74]	[K].SLGEKSPAASGAR.[R]	1xPhospho [S6]	Used	1	1310.61	73.4		133.9	144.4		121.8	102	227.7	96.6		Peak Found	Not Found	Peak Found	Peak Found	Not Found	Peak Found	Peak Found	High	Peak Found
O75683	K.ELSPAALEK.R	[136-144]	O75683 1xPhospho [S138]	[K].ELSPAALEK.[R]	1xPhospho [S3]	Used	0	1037.49	121.4	120.3	99.1	128.8	103.8	140.1	66.1	69.1	51.3		High	High	Peak Found	High	High	High	Peak Found	Peak Found	High
O75691	K.SLSDNGQPGTPDPADSGGTSAK.E	[1732-1753]	O75691 1xPhospho [T/S]	[K].SLSDNGQPGTPDPADSGGTSAK.[E]	1xPhospho [S/T]	Used	0	2138.89		117	95.9	90.5	98.5	90.2	131.7	137	139.3		Not Found	High	High	High	High	High	High	High	Peak Found
O75691	K.SLSDNGQPGTPDPADSGGTSAK.E	[1732-1753]	O75691 1xPhospho [T/S]	[K].SLSDNGQPGTPDPADSGGTSAK.[E]	1xDeamidated [Q/N]; 1xPhospho [T/S]	Used	0	2139.87	6.9	46.7	350.7	60	285.8	21.1	48.3	51.5	29.1		Peak Found	High	High	Peak Found	Peak Found	Peak Found	High	High	Peak Found
O75694	K.AAPQSPSVPK.K	[988-997]	O75694 1xPhospho [S992]; O75694-2 1xPhospho [S933]	[K].AAPQSPSVPK.[K]	1xPhospho [S5]	Not Used	0	1061.5										No Quan Values	High	High	High	High	High	High	High	High	High
O75815-1	R.TGSEPALSPAVVR.R	[368-380]	O75815-1 1xPhospho [S370]; O75815-2 1xPhospho [S46]; O75815-3 1xPhospho [S279]	[R].TGSEPALSPAVVR.[R]	1xPhospho [S3]	Used	0	1363.66		110.5	41.5	175.3	192.6	197.7	139.3		43.1		Not Found	Peak Found	Peak Found	High	High	Peak Found	Peak Found	Not Found	Peak Found
O75821	K.GIPLATGDTSPEPELLPGAPLPPPKEVINGNIK.T	[33-65]	O75821 1xPhospho [S/T]	[K].GIPLATGDTSPEPELLPGAPLPPPKEVINGNIK.[T]	1xPhospho [S/T]	Used	1	3411.78	53.5	170.4	162.6	88.1	34.6	132.6	113.1	71.8	73.4		High	High	High	High	High	High	High	High	High
O75821	K.GIPLATGDTSPEPELLPGAPLPPPK.E	[33-57]	O75821 1xPhospho [S/T]	[K].GIPLATGDTSPEPELLPGAPLPPPK.[E]	1xPhospho [S/T]	Used	0	2544.3	77.3	89	86.7	134.8	62.3	85.9	183.9	136.3	43.8		High	High	High	High	High	High	High	High	High
O75821	K.GIPLATGDTSPEPELLPGAPLPPPKEVINGNIK.T	[33-65]	O75821 1xPhospho [S/T]	[K].GIPLATGDTSPEPELLPGAPLPPPKEVINGNIK.[T]	1xDeamidated [N]; 1xPhospho [S/T]	Used	1	3412.77	91.3	146.2	166	80.6	139.2	117.4	93	27.8	38.6		High	High	High	High	High	High	High	High	High
O75822	-.MAAAAAAAGDSDSWDADAFSVEDPVRK.V	[1-27]	O75822-2 1xPhospho [S]; 1xMet-loss+Acetyl [N-Term]; O75822-3 1xPhospho [S]; 1xMet-loss+Acetyl [N-Term]; O75822 1xPhospho [S]; 1xMet-loss+Acetyl [N-Term]	[-].MAAAAAAAGDSDSWDADAFSVEDPVRK.[V]	1xPhospho [S]; 1xMet-loss+Acetyl [N-Term]	Used	1	2715.16	22.2	94.1	39.7	212.7	107.7	151.9	177.1	58.5	36		High	High	High	High	High	High	High	High	High
O75822	-.MAAAAAAAGDSDSWDADAFSVEDPVR.K	[1-26]	O75822-2 1xPhospho [S]; 1xMet-loss+Acetyl [N-Term]; O75822-3 1xPhospho [S]; 1xMet-loss+Acetyl [N-Term]; O75822 1xPhospho [S]; 1xMet-loss+Acetyl [N-Term]	[-].MAAAAAAAGDSDSWDADAFSVEDPVR.[K]	1xPhospho [S]; 1xMet-loss+Acetyl [N-Term]	Used	0	2587.06	32.1	149.4	27.6	222.6	158.1	92.2	105	55.1	58		High	High	Peak Found	High	High	Peak Found	High	High	Peak Found
O75864-1	R.ISVSSPGR.G	[557-564]	O75864-1 1xPhospho [S561]; O75864-2 1xPhospho [S88]	[R].ISVSSPGR.[G]	1xPhospho [S5]	Not Used	0	882.408										No Quan Values	Peak Found	High	High	High	High	High	High	High	High
O75909-1	K.RAVVVSPKEENK.A	[335-346]	O75909-1 1xPhospho [S340]; O75909 1xPhospho [S340]	[K].RAVVVSPKEENK.[A]	1xPhospho [S6]	Used	2	1435.73		111.8	108.5	59.6	100.9	78.6	144.3	161.1	135.2		Not Found	Peak Found	High	Peak Found	Peak Found	Peak Found	Peak Found	High	Peak Found
O75909-1	R.AVVVSPKEENK.A	[336-346]	O75909-1 1xPhospho [S340]; O75909 1xPhospho [S340]	[R].AVVVSPKEENK.[A]	1xPhospho [S5]	Used	1	1279.63	80	82.3	70.6	126.2	82.7	83.4	108.7	146.9	119.2		High	High	Peak Found	High	Peak Found	High	High	High	High
O75909-1	K.KPSPQPSSPR.Q	[322-331]	O75909-1 1xPhospho [S324]; O75909 1xPhospho [S324]; O75909-4 1xPhospho [S324]	[K].KPSPQPSSPR.[Q]	1xPhospho [S3]	Used	0	1160.55	36.2	139.6	96.9	141.6			129.8	197.2	158.7		Peak Found	Peak Found	High	Peak Found	Not Found	Not Found	Peak Found	Peak Found	Peak Found
O75925	K.GILSLPHQASPVSR.T	[494-507]	O75925 1xPhospho [S503]; O75925-2 1xPhospho [S505]	[K].GILSLPHQASPVSR.[T]	1xPhospho [S10]	Used	0	1541.78	62.2	95.9	66.8	119.8	84.6	85.5	123.7	137.8	123.7		Peak Found	Peak Found	High	Peak Found	Peak Found	Peak Found	Peak Found	Peak Found	Peak Found
O75925	R.TCPSLSPTSPLNNK.G	[480-493]	O75925 1xPhospho [S488]; O75925-2 1xPhospho [S490]	[R].TCPSLSPTSPLNNK.[G]	1xCarbamidomethyl [C2]; 1xPhospho [S9]	Used	0	1595.71		140.4		100.6	124.1	152.4	127.4	135.4	119.8		Not Found	Peak Found	Not Found	Peak Found	Peak Found	Peak Found	Peak Found	High	Peak Found
O75940	R.SIFASPESVTGK.V	[197-208]	O75940 1xPhospho [S201]	[R].SIFASPESVTGK.[V]	1xPhospho [S5]	Used	0	1302.6	73.6	116.7	68.5	49	55.3	68	154.2	179.4	135.3		Peak Found	High	Peak Found	Peak Found	Peak Found	Peak Found	High	High	Peak Found
O75962-1	R.RLSSGKADGHVK.K	[1783-1794]	O75962-4 2xPhospho [S1726; S1727]; O75962-5 2xPhospho [S1785; S1786]; O75962-2 2xPhospho [S1785; S1786]; O75962-1 2xPhospho [S1785; S1786]	[R].RLSSGKADGHVK.[K]	2xPhospho [S3; S4]	Used	2	1414.62	135.2	136.1	142.2	105.3	175.7	42.2	25.6		137.6		Peak Found	High	High	Peak Found	High	Peak Found	Peak Found	Not Found	Peak Found
O75962-1	K.STSWHTALR.L	[2629-2637]	O75962-3 1xPhospho [S128]; O75962-4 1xPhospho [S2570]; O75962-2 1xPhospho [S2453]; O75962-1 1xPhospho [S2629]	[K].STSWHTALR.[L]	1xPhospho [S1]	Used	0	1138.5	149.6	139.3	88.4	31	82.8	127.3	157.4	41.2	83.1		High	Peak Found	Peak Found	Peak Found	Peak Found	High	High	Peak Found	High
O76021	K.SPAKSPNPSTPR.G	[392-403]	O76021-2 2xPhospho [S172; S176]; O76021 2xPhospho [S392; S396]	[K].SPAKSPNPSTPR.[G]	2xPhospho [S1; S5]	Used	1	1398.58		46	23.6	117.9	89.5	77	232.2	200	113.8		Not Found	Peak Found	Peak Found	Peak Found	Peak Found	Peak Found	Peak Found	Peak Found	High
O76021	K.ATNESEDEIPQLVPIGKK.T	[357-374]	O76021-2 1xPhospho [T/S]; O76021 1xPhospho [T/S]	[K].ATNESEDEIPQLVPIGKK.[T]	1xPhospho [T/S]	Used	1	2047.99	78.6	110	98.5	130	91.2	91.2	124.6	79.7	96.3		High	High	High	High	High	High	High	High	High
O76021	K.AAESETPGKSPEK.K	[418-430]	O76021-2 1xPhospho [S207]; O76021 1xPhospho [S427]	[K].AAESETPGKSPEK.[K]	1xPhospho [S10]	Used	1	1410.61	97.5	121.3	41.6	118.8	83.9	75.1	118.5	117.8	125.5		High	High	High	Peak Found	Peak Found	Peak Found	High	High	High
O76021	K.KSPAKSPNPSTPR.G	[391-403]	O76021-2 1xPhospho [S]; O76021 1xPhospho [S]	[K].KSPAKSPNPSTPR.[G]	1xPhospho [S]	Used	2	1446.71	84.6				172.8	193.8		230.2	218.6		High	High	High	High	High	High	High	High	High
O76021	K.ATNESEDEIPQLVPIGK.K	[357-373]	O76021-2 1xPhospho [S/T]; O76021 1xPhospho [S/T]	[K].ATNESEDEIPQLVPIGK.[K]	1xPhospho [S/T]	Used	0	1919.9	101.3	117.2	111.1	136.1	84.5	88.7	121.3	73.5	66.1		High	High	High	High	High	High	High	High	High
O76021	K.AAESETPGKSPEKKPK.I	[418-433]	O76021-2 1xPhospho [S/T]; O76021 1xPhospho [S/T]	[K].AAESETPGKSPEKKPK.[I]	1xPhospho [S/T]	Used	2	1763.86	96.2	61.3	63.6	138	164.5	96.7	51.9	94.8	132.9		High	High	High	High	High	High	High	High	High
O76021	K.ATNESEDEIPQLVPIGK.K	[357-373]	O76021-2 1xPhospho [S/T]; O76021 1xPhospho [S/T]	[K].ATNESEDEIPQLVPIGK.[K]	1xDeamidated [N3]; 1xPhospho [S/T]	Used	0	1920.88	64.6	158.4	132.4	185.6	60.2	129.4	169.5				High	Peak Found	Peak Found	Peak Found	High	Peak Found	High	Not Found	Not Found
O76031	K.ESSEEEYDSGVEEEGWPR.Q	[609-626]	O76031 1xPhospho [S617]	[K].ESSEEEYDSGVEEEGWPR.[Q]	1xPhospho [S9]	Used	0	2193.81		223.3	50.6	69.2	75.4	46.8	152.6	164.5	117.5		Not Found	High	Peak Found	Peak Found	High	Peak Found	High	High	High
O76074	R.GHTESCSCPLQQSPR.A	[74-88]	O76074-2 1xPhospho [S]; O76074 1xPhospho [S]	[R].GHTESCSCPLQQSPR.[A]	2xCarbamidomethyl [C6; C8]; 1xPhospho [S]	Used	0	1823.72	78.4	162		143.7	335	181					Peak Found	High	Not Found	Peak Found	High	Peak Found	Not Found	Not Found	Not Found
O94761	R.GRRPSQDDVEAAPEETR.A	[23-39]	O94761 1xPhospho [S27]	[R].GRRPSQDDVEAAPEETR.[A]	1xPhospho [S5]	Used	1	1992.88	175.7	183.7	204	44.6	59	48	31.2	84.3	69.4		High	High	High	Peak Found	Peak Found	Peak Found	Peak Found	Peak Found	Peak Found
O94761	R.AATKSPQPTPGR.S	[85-96]	O94761 1xPhospho [S/T]	[R].AATKSPQPTPGR.[S]	1xPhospho [S/T]	Used	1	1290.62	59.2	188.9	36.6	126.4	155	111.4		136	86.5		Peak Found	Peak Found	Peak Found	Peak Found	High	Peak Found	Not Found	High	Peak Found
O94762-1	K.YTGEEDGAGGHSPAPPQTEECLR.E	[804-826]	O94762-1 1xPhospho [S815]; O94762-4 1xPhospho [S788]	[K].YTGEEDGAGGHSPAPPQTEECLR.[E]	1xCarbamidomethyl [C21]; 1xDeamidated [Q17]; 1xPhospho [S12]	Not Used	0	2539.01										No Quan Values	Not Found	Not Found	High	Not Found	Not Found	Not Found	Not Found	Not Found	Not Found
O94762-1	R.GEVPGGSAHYGGPSPEKK.A	[714-731]	O94762-1 1xPhospho [S727]; O94762-4 1xPhospho [S700]	[R].GEVPGGSAHYGGPSPEKK.[A]	1xPhospho [S14]	Used	1	1833.82	63.1	70.6	99.2	44.1	54.8	39.1	129.8	183.9	215.4		High	Peak Found	High	Peak Found	Peak Found	Peak Found	High	Peak Found	High
O94762-1	K.YTGEEDGAGGHSPAPPQTEECLR.E	[804-826]	O94762-1 1xPhospho [T/S]; O94762-4 1xPhospho [T/S]	[K].YTGEEDGAGGHSPAPPQTEECLR.[E]	1xCarbamidomethyl [C21]; 1xPhospho [T/S]	Used	0	2538.02	95	98.4	114.6	42.2	59.8	59	160.8	122.2	147.9		Peak Found	High	Peak Found	Peak Found	High	Peak Found	Peak Found	High	High
O94763-1	R.KNSTGSGHSAQELPTIR.T	[370-386]	O94763-3 1xPhospho [S/T]; O94763-4 1xPhospho [S/T]; O94763-1 1xPhospho [S/T]; O94763-2 1xPhospho [S/T]	[R].KNSTGSGHSAQELPTIR.[T]	1xPhospho [S/T]	Used	1	1862.88	207.2	122.1	157.3	51.9	56.7	44.1	27.5	81.1	152.2		High	High	High	High	High	Peak Found	High	High	High
O94776	R.GHLSRPEAQSLSPYTTSANR.A	[424-443]	O94776-2 1xPhospho [S254]; O94776 1xPhospho [S427]	[R].GHLSRPEAQSLSPYTTSANR.[A]	1xPhospho [S4]	Used	0	2252.05	92.1	46.6	70.9	92.5	174.6	70.1	26.3	136.5	190.5		Peak Found	Peak Found	Peak Found	Peak Found	Peak Found	Peak Found	Peak Found	Peak Found	High
O94776	R.DISSSLNSLADSNAR.E	[50-64]	O94776 1xPhospho [S]	[R].DISSSLNSLADSNAR.[E]	1xPhospho [S]	Used	0	1629.71		109.5		116.3	98.6	102.2	219.2	149	105.3		Not Found	High	Not Found	Peak Found	High	High	High	High	High
O94782	R.ASEIDQVVPAAQSSPINCEKR.E	[54-74]	O94782 1xPhospho [S66]	[R].ASEIDQVVPAAQSSPINCEKR.[E]	1xCarbamidomethyl [C18]; 1xPhospho [S13]	Used	1	2379.1		74.1	71.2	88	109.5	124.7	121.3	154.2	157		Not Found	Peak Found	Peak Found	Peak Found	Peak Found	Peak Found	Peak Found	High	Peak Found
O94804	K.QVAEQGGDLSPAANR.S	[429-443]	O94804 1xPhospho [S438]	[K].QVAEQGGDLSPAANR.[S]	1xPhospho [S10]	Used	0	1592.71	60.6	70.2	101.2	97.2	59.2	70.9	144.2	156.1	140.3		Peak Found	Peak Found	High	High	High	High	High	High	High
O94804	K.LSEEAECPNPSTPSK.A	[941-955]	O94804 1xPhospho [T952]	[K].LSEEAECPNPSTPSK.[A]	1xCarbamidomethyl [C7]; 1xPhospho [T12]	Used	0	1725.7	69.3	110.4	82.3	97.5	109	87.2	47.6	128.2	168.5		High	High	High	High	High	High	Peak Found	High	Peak Found
O94806	R.LSNGSFSAPSLTNSR.G	[40-54]	O94806 1xPhospho [S]; O94806-2 1xPhospho [S]	[R].LSNGSFSAPSLTNSR.[G]	1xPhospho [S]	Used	0	1617.73	54.5			100		88.7	279	198.3	179.5		Peak Found	Not Found	Not Found	Peak Found	Not Found	Peak Found	High	Peak Found	High
O94819	R.AGSRPQSPSGDADAR.G	[308-322]	O94819 2xPhospho [S310; S314]	[R].AGSRPQSPSGDADAR.[G]	2xPhospho [S3; S7]	Used	0	1631.62	118.9	88.2	62.4	211	228.7	190.7					High	Peak Found	Peak Found	Peak Found	High	Peak Found	Not Found	Not Found	Not Found
O94819	R.AGSRPQSPSGDADAR.G	[308-322]	O94819 1xPhospho [S314]	[R].AGSRPQSPSGDADAR.[G]	1xPhospho [S7]	Used	0	1551.65	144.2	128.3	96.2	195.3	185.4	150.7					High	High	High	High	High	High	Not Found	Not Found	Not Found
O94826	R.ASPAPGSGHPEGPGAHLDMNSLDR.A	[90-113]	O94826 1xPhospho [S91]	[R].ASPAPGSGHPEGPGAHLDMNSLDR.[A]	1xPhospho [S2]; 1xOxidation [M19]	Used	0	2466.05	131	115.1	117.2	90.9	146.3	110.2	33.8	57	98.5		High	High	High	High	High	High	High	Peak Found	High
O94826	R.ASPAPGSGHPEGPGAHLDMNSLDR.A	[90-113]	O94826 1xPhospho [S91]	[R].ASPAPGSGHPEGPGAHLDMNSLDR.[A]	1xPhospho [S2]	Used	0	2450.06	81.7	111.6	139.8	98.3	164.3	80.8	46.2	79.5	97.9		High	High	High	High	High	High	High	High	High
O94826	R.ASPAPGSGHPEGPGAHLDMNSLDR.A	[90-113]	O94826 1xPhospho [S91]	[R].ASPAPGSGHPEGPGAHLDMNSLDR.[A]	1xDeamidated [N20]; 1xPhospho [S2]	Used	0	2451.04	92.2	142.8	141.8	75	181.2	41.5	25.3	93.4	106.9		Peak Found	Peak Found	High	High	High	Peak Found	High	Peak Found	High
O94842	R.LSTTPSPTSSLHEDGVEDFRR.Q	[173-193]	O94842-3 2xPhospho [T150; T154]; O94842 2xPhospho [T176; T180]; O94842-2 2xPhospho [T153; T157]	[R].LSTTPSPTSSLHEDGVEDFRR.[Q]	2xPhospho [T4; T8]	Used	1	2491.05		130.2	136.1	93.1	131.2	68.6	101.7	99.6	139.4		Not Found	Peak Found	Peak Found	Peak Found	Peak Found	Peak Found	High	Peak Found	Peak Found
O94854	R.DTSTVSKEECEKVPFSPR.T	[427-444]	O94854 1xPhospho [S442]; O94854-2 1xPhospho [S442]	[R].DTSTVSKEECEKVPFSPR.[T]	1xCarbamidomethyl [C10]; 1xPhospho [S16]	Used	2	2175.96	157.7	107.9	139	57.8	63	50.3	47.7	105.7	170.8		Peak Found	High	Peak Found	Peak Found	Peak Found	Peak Found	Peak Found	Peak Found	Peak Found
O94875-1	K.SFTSSSPSSPSR.A	[294-305]	O94875-10 1xPhospho [S553]; O94875-5 1xPhospho [S420]; O94875-9 1xPhospho [S373]; O94875-2 1xPhospho [S395]; O94875-4 1xPhospho [S420]; O94875-1 1xPhospho [S302]; O94875-7 1xPhospho [S206]; O94875-3 1xPhospho [S374]; O94875-11 1xPhospho [S402]; O94875-12 1xPhospho [S460]; O94875-8 1xPhospho [S390]	[K].SFTSSSPSSPSR.[A]	1xPhospho [S9]	Used	0	1306.53				36.6	31.5	36.3	214.6	323.6	257.4		Not Found	Not Found	Not Found	Peak Found	Peak Found	Peak Found	High	High	High
O94875-1	R.TSPGRVDLPGSSTTLTK.S	[277-293]	O94875-10 1xPhospho [S529]; O94875-5 1xPhospho [S396]; O94875-9 1xPhospho [S349]; O94875-2 1xPhospho [S371]; O94875-4 1xPhospho [S396]; O94875-1 1xPhospho [S278]; O94875-7 1xPhospho [S182]; O94875-3 1xPhospho [S350]; O94875-11 1xPhospho [S378]; O94875-12 1xPhospho [S436]; O94875-8 1xPhospho [S366]	[R].TSPGRVDLPGSSTTLTK.[S]	1xPhospho [S2]	Used	1	1796.88				24.8	24.7	29.2	283.2	278.4	259.7		Not Found	Not Found	Not Found	Peak Found	Peak Found	Peak Found	High	High	High
O94876	K.ALGVISNFQSSPK.Y	[404-416]	O94876-2 1xPhospho [S]; O94876 1xPhospho [S]	[K].ALGVISNFQSSPK.[Y]	1xPhospho [S]	Used	0	1427.69	251.2	89.8	20.8	136.8	89.4	114.7	48.7	85.6	63		Peak Found	High	Peak Found	High	High	High	Peak Found	Peak Found	Peak Found
O94885	K.EVIKSPTASR.I	[438-447]	O94885 1xPhospho [S442]	[K].EVIKSPTASR.[I]	1xPhospho [S5]	Used	1	1167.58				9	255	214.4		210.4	211.1		Not Found	Not Found	Not Found	Peak Found	High	High	Not Found	Peak Found	High
O94885	R.RVSQDLEVEKPDASPTSLQLR.S	[88-108]	O94885 1xPhospho [S90]	[R].RVSQDLEVEKPDASPTSLQLR.[S]	1xPhospho [S3]	Used	1	2448.21	97.8	134.3	97.6	93.3	60.7	40	79.6	112.8	183.9		Peak Found	High	High	Peak Found	Peak Found	Peak Found	Peak Found	High	High
O94885	R.EQSDDETEESVK.F	[246-257]	O94885 1xPhospho [S248]	[R].EQSDDETEESVK.[F]	1xPhospho [S3]	Used	0	1475.54	56	92	61.5	86.8	85	101.8	146.5	153.3	116.9		Peak Found	Peak Found	Peak Found	High	Peak Found	High	Peak Found	Peak Found	High
O94885	K.SNSEDSSVGKGDWK.K	[135-148]	O94885 1xPhospho [S137]	[K].SNSEDSSVGKGDWK.[K]	1xPhospho [S3]	Used	1	1575.63	95.8	139.5		160.2	208.8	191.6		54.5	49.7		Peak Found	Peak Found	Not Found	Peak Found	High	Peak Found	Not Found	Peak Found	Peak Found
O94885	R.SLPVSICR.S	[813-820]	O94885 1xPhospho [S813]	[R].SLPVSICR.[S]	1xCarbamidomethyl [C7]; 1xPhospho [S1]	Used	0	1011.47		144.5	105.3	156	143	144.4	78.8	69.1	58.8		Not Found	High	Peak Found	High	High	High	Peak Found	Peak Found	High
O94885	R.TCSFGGFDLTNR.S	[405-416]	O94885 1xPhospho [S407]	[R].TCSFGGFDLTNR.[S]	1xCarbamidomethyl [C2]; 1xPhospho [S3]	Used	0	1454.58	66.3	112.3	78.7	135.4	105.4	155.1	67.8	98.8	80.2		Peak Found	Peak Found	High	High	Peak Found	Peak Found	Peak Found	High	Peak Found
O94885	K.LLVDSQGLSGCSPR.D	[710-723]	O94885 1xPhospho [S718]	[K].LLVDSQGLSGCSPR.[D]	1xCarbamidomethyl [C11]; 1xPhospho [S9]	Used	0	1568.71				181.4	177.2	216.1	126	98.9	100.4		Not Found	Not Found	Not Found	High	High	Peak Found	Peak Found	Peak Found	Peak Found
O94887-1	K.DSSSSLTDPQVSYVKSPAAER.R	[424-444]	O94887-1 1xPhospho [S439]; O94887-2 1xPhospho [S439]; O94887-3 1xPhospho [S439]	[K].DSSSSLTDPQVSYVKSPAAER.[R]	1xPhospho [S16]	Used	1	2304.04	58	50.9	50.7	152.4	157.4	148.9	85.5	105	91.2		Peak Found	Peak Found	Peak Found	Peak Found	High	High	High	High	Peak Found
O94888	R.SESLIDASEDSQLEAAIR.A	[278-295]	O94888 1xPhospho [S278]	[R].SESLIDASEDSQLEAAIR.[A]	1xPhospho [S1]	Used	0	2013.9		363.7					271.7		264.6		Not Found	High	Not Found	Not Found	Not Found	Not Found	Peak Found	Not Found	High
O94913	K.SRSPIIHSPK.R	[487-496]	O94913 2xPhospho [S489; S494]	[K].SRSPIIHSPK.[R]	2xPhospho [S3; S8]	Used	1	1281.58	85.7	86	80	111.2	110	99.9	82.1	116.1	129		High	High	High	High	High	High	High	High	High
O94913	K.SRSPIIHSPKR.R	[487-497]	O94913 2xPhospho [S489; S494]	[K].SRSPIIHSPKR.[R]	2xPhospho [S3; S8]	Used	2	1437.68		98.8	101.4	40.7	211.7	130.9	70.4	109.5	136.5		Not Found	High	Peak Found	Peak Found	Peak Found	Peak Found	Peak Found	Peak Found	Peak Found
O94913	R.SPIIHSPK.R	[489-496]	O94913 1xPhospho [S494]	[R].SPIIHSPK.[R]	1xPhospho [S6]	Used	0	958.476	98.8	82.3	70.3	130	69.6	78.7	103.7	152.9	113.7		High	High	High	Peak Found	High	Peak Found	High	High	High
O94913	K.SRSPIIHSPK.R	[487-496]	O94913 1xPhospho [S489]	[K].SRSPIIHSPK.[R]	1xPhospho [S3]	Used	1	1201.61		74	82.7	116.2	141.1	137.4	114.1	101.2	133.3		Not Found	Peak Found	Peak Found	Peak Found	Peak Found	High	Peak Found	Peak Found	Peak Found
O94915-1	K.TYGGDTGSPEISFTK.I	[2265-2279]	O94915-1 1xPhospho [T/S]	[K].TYGGDTGSPEISFTK.[I]	1xPhospho [T/S]	Used	0	1639.69	66.4	105.6	95.8	100.9	70.9	108.3	114.8	128.4	109		Peak Found	Peak Found	Peak Found	Peak Found	Peak Found	Peak Found	High	High	Peak Found
O94915-1	R.STSSTSSGSNSNALVPVSWK.R	[2330-2349]	O94915-1 1xPhospho [S2340]	[R].STSSTSSGSNSNALVPVSWK.[R]	1xPhospho [S11]	Used	0	2075.93	65.7	80.7		221.5	174.2	216.4		85.4	56.2		Peak Found	Peak Found	Not Found	Peak Found	Peak Found	Peak Found	Not Found	Peak Found	High
O94929-1	R.TSETSISPPGSSIGSPNR.V	[276-293]	O94929-2 1xPhospho [S282]; O94929-3 1xPhospho [S282]; O94929-1 1xPhospho [S282]	[R].TSETSISPPGSSIGSPNR.[V]	1xPhospho [S7]	Used	0	1853.83				220.8	214.8	339.2	84.4		40.8		Not Found	Not Found	Not Found	Peak Found	High	High	Peak Found	Not Found	Peak Found
O94929-1	R.RFSSGGEEDDFDR.S	[501-513]	O94929-2 1xPhospho [S392]; O94929-3 1xPhospho [S408]; O94929-1 1xPhospho [S503]	[R].RFSSGGEEDDFDR.[S]	1xPhospho [S3]	Used	1	1596.6	92.9	88.6	88.1	178.3	223.1	165.3	30.7		32.9		High	Peak Found	Peak Found	High	Peak Found	Peak Found	Peak Found	Not Found	Peak Found
O94929-1	R.ASSPGYIDSPTYSR.Q	[371-384]	O94929-2 1xPhospho [S310]; O94929-3 1xPhospho [S310]; O94929-1 1xPhospho [S372]	[R].ASSPGYIDSPTYSR.[Q]	1xPhospho [S2]	Used	0	1580.66		46.3		284	264.6	261.2		43.9			Not Found	Peak Found	Not Found	Peak Found	Peak Found	High	Not Found	Peak Found	Not Found
O94964-2	R.TGQPAQPAPSAQQPPRPPASPDEPSVAASSVGSSR.L	[156-190]	O94964-2 1xPhospho [S165]	[R].TGQPAQPAPSAQQPPRPPASPDEPSVAASSVGSSR.[L]	1xDeamidated [Q13]; 1xPhospho [S10]	Not Used	0	3490.62										No Quan Values	Not Found	Not Found	Not Found	Not Found	Not Found	Not Found	Not Found	Not Found	High
O94979	R.EQTLSPTITSGLHNIAR.S	[1159-1175]	O94979-4 1xPhospho [T1122]; O94979-6 1xPhospho [T1008]; O94979-10 1xPhospho [T1107]; O94979-8 1xPhospho [T1174]; O94979-3 1xPhospho [T1047]; O94979-7 1xPhospho [T910]; O94979-2 1xPhospho [T1146]; O94979 1xPhospho [T1161]; O94979-9 1xPhospho [T1141]	[R].EQTLSPTITSGLHNIAR.[S]	1xDeamidated [Q2]; 1xPhospho [T3]	Not Used	0	1918.93										No Quan Values	High	Not Found	Not Found	Not Found	Not Found	Not Found	Not Found	Not Found	Not Found
O94979	R.EQTLSPTITSGLHNIAR.S	[1159-1175]	O94979-4 1xPhospho [T]; O94979-6 1xPhospho [T]; O94979-10 1xPhospho [T]; O94979-8 1xPhospho [T]; O94979-3 1xPhospho [T]; O94979-7 1xPhospho [T]; O94979-2 1xPhospho [T]; O94979 1xPhospho [T]; O94979-9 1xPhospho [T]	[R].EQTLSPTITSGLHNIAR.[S]	1xPhospho [T]	Used	0	1917.94	82.3	83.2	83.2	98.3	111.2	103.3	84.8	121.3	132.5		Peak Found	Peak Found	High	High	High	High	High	Peak Found	High
O94979	R.AQGEPVAGHESPKIPYEK.Q	[789-806]	O94979-4 1xPhospho [S760]; O94979-6 1xPhospho [S760]; O94979-10 1xPhospho [S760]; O94979-8 1xPhospho [S799]; O94979-3 1xPhospho [S799]; O94979-7 1xPhospho [S532]; O94979-2 1xPhospho [S799]; O94979 1xPhospho [S799]; O94979-9 1xPhospho [S794]	[R].AQGEPVAGHESPKIPYEK.[Q]	1xPhospho [S11]	Used	1	2016.94	99.7	71.9	111.5	125.7	183.2	144	25.1	58.4	80.5		High	High	High	High	High	High	High	High	High
O95049-1	R.RSPGGGSEANGLALVSGFK.R	[163-181]	O95049-4 1xPhospho [S173]; O95049-3 1xPhospho [S183]; O95049-5 1xPhospho [S128]; O95049-1 1xPhospho [S164]	[R].RSPGGGSEANGLALVSGFK.[R]	1xDeamidated [N10]; 1xPhospho [S2]	Not Used	1	1884.89										No Quan Values	Peak Found	High	High	High	High	Peak Found	Peak Found	Peak Found	Peak Found
O95049-1	R.HAQRSPEASQTDSPVESPR.L	[315-333]	O95049-4 2xPhospho [S332; S336]; O95049-3 2xPhospho [S342; S346]; O95049-5 2xPhospho [S287; S291]; O95049-1 2xPhospho [S323; S327]	[R].HAQRSPEASQTDSPVESPR.[L]	2xPhospho [S9; S13]	Used	1	2238.92	169.5	146.3	173	125.2	170.4	115.6					High	Peak Found	Peak Found	Peak Found	Peak Found	Peak Found	Not Found	Not Found	Not Found
O95049-1	R.TISEPDEQR.S	[344-352]	O95049-4 1xPhospho [S355]; O95049-3 1xPhospho [S365]; O95049-5 1xPhospho [S310]; O95049-1 1xPhospho [S346]	[R].TISEPDEQR.[S]	1xPhospho [S3]	Used	0	1154.47	146.9	147.8	74.2	183.6	147.7	156.3	16.4	12.9	14.3		Peak Found	High	High	High	High	High	Peak Found	Peak Found	Peak Found
O95049-1	R.TISEPDEQRSELPR.E	[344-357]	O95049-4 1xPhospho [S355]; O95049-3 1xPhospho [S365]; O95049-5 1xPhospho [S310]; O95049-1 1xPhospho [S346]	[R].TISEPDEQRSELPR.[E]	1xPhospho [S3]	Used	1	1736.79	131.3	149	95.6	166.7	163.6	156.1	8.5	13.8	15.4		Peak Found	Peak Found	Peak Found	High	Peak Found	Peak Found	Peak Found	Peak Found	Peak Found
O95049-1	R.SPGGGSEANGLALVSGFKR.L	[164-182]	O95049-4 1xPhospho [S173]; O95049-3 1xPhospho [S183]; O95049-5 1xPhospho [S128]; O95049-1 1xPhospho [S164]	[R].SPGGGSEANGLALVSGFKR.[L]	1xPhospho [S1]	Used	1	1883.9	176.9	131.8	108.1	144.4	159.4	166.7			12.6		High	High	High	High	High	High	Not Found	Not Found	Peak Found
O95049-1	R.SREDLSALTR.Q	[591-600]	O95049-4 1xPhospho [S600]; O95049-3 1xPhospho [S610]; O95049-5 1xPhospho [S555]; O95049-1 1xPhospho [S591]	[R].SREDLSALTR.[Q]	1xPhospho [S1]	Used	1	1227.57	101.5	67.4	76.6	226.8	223	188.2	8	3.8	4.7		Peak Found	High	Peak Found	High	High	High	Peak Found	Peak Found	Peak Found
O95049-1	R.SPGGGSEANGLALVSGFK.R	[164-181]	O95049-4 1xPhospho [S]; O95049-3 1xPhospho [S]; O95049-5 1xPhospho [S]; O95049-1 1xPhospho [S]	[R].SPGGGSEANGLALVSGFK.[R]	1xPhospho [S]	Used	0	1727.8	108.1	164.8	130	158.9	143.9	145.7	31.7	8.4	8.5		High	High	High	High	High	High	Peak Found	Peak Found	Peak Found
O95049-1	R.RSPGGGSEANGLALVSGFK.R	[163-181]	O95049-4 1xPhospho [S]; O95049-3 1xPhospho [S]; O95049-5 1xPhospho [S]; O95049-1 1xPhospho [S]	[R].RSPGGGSEANGLALVSGFK.[R]	1xPhospho [S]	Used	1	1883.9	11.6	173.3	130.6	172.7	191.6	204.5			15.5		Peak Found	Peak Found	High	Peak Found	High	High	Not Found	Not Found	Peak Found
O95049-1	R.SPGGGSEANGLALVSGFKR.L	[164-182]	O95049-4 1xPhospho [S173]; O95049-3 1xPhospho [S183]; O95049-5 1xPhospho [S128]; O95049-1 1xPhospho [S164]	[R].SPGGGSEANGLALVSGFKR.[L]	1xDeamidated [N9]; 1xPhospho [S1]	Used	1	1884.89		176	172.1	180.6	170.7	200.5					High	High	High	Peak Found	High	High	Peak Found	Peak Found	Peak Found
O95049-1	R.SPGGGSEANGLALVSGFK.R	[164-181]	O95049-4 1xPhospho [S173]; O95049-3 1xPhospho [S183]; O95049-5 1xPhospho [S128]; O95049-1 1xPhospho [S164]	[R].SPGGGSEANGLALVSGFK.[R]	1xDeamidated [N9]; 1xPhospho [S1]	Used	0	1728.78	126	165.1	128.6	170.6	141	144.7	9.8	6.7	7.5		High	High	High	High	High	High	Peak Found	Peak Found	Peak Found
O95071	R.RISQSQPVR.G	[1547-1555]	O95071-2 1xPhospho [S1549]; O95071 1xPhospho [S1549]	[R].RISQSQPVR.[G]	1xPhospho [S3]	Used	1	1150.57	116.9	93	97.3	94.8	94.3	82.9	89.5	121.6	109.6		High	High	High	High	High	High	High	High	High
O95071	R.STPAPKEEEKVNEEQWSLR.E	[636-654]	O95071-2 1xPhospho [S636]; O95071 1xPhospho [S636]	[R].STPAPKEEEKVNEEQWSLR.[E]	1xPhospho [S1]	Used	2	2337.08	126.4	87.6	71.5	70.2	127.2	95.4	51.1	113.4	157.1		Peak Found	Peak Found	Peak Found	Peak Found	Peak Found	Peak Found	Peak Found	Peak Found	High
O95104	K.IEIIQPLLDMAAGTSNAAPVAENVTNNEGSPPPPVK.V	[125-160]	O95104-3 1xPhospho [T/S]; O95104-2 1xPhospho [T/S]; O95104 1xPhospho [T/S]	[K].IEIIQPLLDMAAGTSNAAPVAENVTNNEGSPPPPVK.[V]	1xPhospho [T/S]	Used	0	3734.83	9	94.2	25.7	68.2	89.8	25.4	394.2	92.8	100.8		Peak Found	Peak Found	Peak Found	Peak Found	High	Peak Found	High	High	High
O95104	K.IEIIQPLLDMAAGTSNAAPVAENVTNNEGSPPPPVK.V	[125-160]	O95104-3 1xPhospho [T]; O95104-2 1xPhospho [T]; O95104 1xPhospho [T]	[K].IEIIQPLLDMAAGTSNAAPVAENVTNNEGSPPPPVK.[V]	1xDeamidated [N/Q]; 1xPhospho [T/S]	Used	0	3735.82		302.8	103.6	129.3	16.1	126.9		112.6	108.6		Not Found	High	Peak Found	High	Peak Found	Peak Found	Not Found	Peak Found	Peak Found
O95155	R.SQSMDIDGVSCEK.S	[103-115]	O95155-4 1xPhospho [S105]; O95155-2 1xPhospho [S105]; O95155 1xPhospho [S105]	[R].SQSMDIDGVSCEK.[S]	1xCarbamidomethyl [C11]; 1xPhospho [S3]	Used	0	1535.58		195.4	138.3	120.8	80.8	75.1	75.6	111.5	102.5		Not Found	High	High	Peak Found	Peak Found	Peak Found	Peak Found	Peak Found	Peak Found
O95163	K.LGAVGGSGFK.V	[465-474]	O95163 1xPhospho [S471]	[K].LGAVGGSGFK.[V]	1xPhospho [S7]	Used	0	972.455	280.2	284.7	240.8				29.7	33.4	31.2		Peak Found	High	Peak Found	Not Found	Not Found	Not Found	Peak Found	Peak Found	Peak Found
O95171	R.YSSDDTLDR.I	[89-97]	O95171-3 1xPhospho [S91]; O95171 1xPhospho [S91]; O95171-2 1xPhospho [S91]	[R].YSSDDTLDR.[I]	1xPhospho [S3]	Used	0	1151.43				249.6	276.9	334.9	15.1	13.2	10.3		Not Found	Not Found	Not Found	Peak Found	High	High	Peak Found	Peak Found	Peak Found
O95197-5	-.MAEPSAATQSHSISSSSFGAEPSAPGGGGSPGACPALGTK.S	[1-40]	O95197-4 1xPhospho [S]; 1xMet-loss+Acetyl [N-Term]; O95197-3 1xPhospho [S]; 1xMet-loss+Acetyl [N-Term]; O95197-5 1xPhospho [S]; 1xMet-loss+Acetyl [N-Term]; O95197 1xPhospho [S]; 1xMet-loss+Acetyl [N-Term]; O95197-6 1xPhospho [S]; 1xMet-loss+Acetyl [N-Term]; O95197-7 1xPhospho [S]; 1xMet-loss+Acetyl [N-Term]; O95197-2 1xPhospho [S]; 1xMet-loss+Acetyl [N-Term]	[-].MAEPSAATQSHSISSSSFGAEPSAPGGGGSPGACPALGTK.[S]	1xCarbamidomethyl [C34]; 1xDeamidated [Q9]; 1xPhospho [S]; 1xMet-loss+Acetyl [N-Term]	Used	0	3693.6				537	363						Not Found	Not Found	Not Found	High	High	Not Found	Not Found	Not Found	Not Found
O95201	-.MSADGGGIQDTQDKETPPEVPDR.G	[1-23]	O95201 2xPhospho [T11; T16]; 1xMet-loss+Acetyl [N-Term]	[-].MSADGGGIQDTQDKETPPEVPDR.[G]	2xPhospho [T11; T16]; 1xMet-loss+Acetyl [N-Term]	Not Used	1	2514.01										No Quan Values	Not Found	High	Not Found	Not Found	Not Found	Not Found	Not Found	Not Found	Not Found
O95208-2	R.GSSQPNLSTSHSEQEYGK.A	[171-188]	O95208-2 1xPhospho [S173]; O95208-1 1xPhospho [S173]; O95208-3 1xPhospho [S134]	[R].GSSQPNLSTSHSEQEYGK.[A]	1xPhospho [S3]	Used	0	2015.83	131.7	226.1	139.1	26.2	66.9	68.3	62.7	79	100.1		Peak Found	High	High	Peak Found	Peak Found	Peak Found	Peak Found	Peak Found	High
O95208-2	K.AGGSPASYHGSTSPR.V	[189-203]	O95208-2 1xPhospho [S/Y]; O95208-3 1xPhospho [S/Y]	[K].AGGSPASYHGSTSPR.[V]	1xPhospho [S/Y]	Used	0	1511.63	207.6	200.7	201.9	39.5	35.5	36.1	47.6	59.5	71.6		High	High	High	Peak Found	High	Peak Found	High	High	High
O95218-2	R.ENVEYIEREESDGEYDEFGR.K	[110-129]	O95218-2 1xPhospho [S120]; O95218-1 1xPhospho [S120]	[R].ENVEYIEREESDGEYDEFGR.[K]	1xDeamidated [N2]; 1xPhospho [S11]	Not Used	1	2545.99										No Quan Values	High	Not Found	Not Found	Not Found	Not Found	Not Found	Not Found	Not Found	Not Found
O95218-2	R.SRSPESQVIGENTK.Q	[305-318]	O95218-2 2xPhospho [S305; S307]	[R].SRSPESQVIGENTK.[Q]	2xPhospho [S1; S3]	Used	1	1691.7	77.5	114.1	65.2	83.9	109.4	113	130.7	136.1	70.1		High	High	Peak Found	High	Peak Found	Peak Found	Peak Found	Peak Found	Peak Found
O95218-2	R.ENVEYIEREESDGEYDEFGR.K	[110-129]	O95218-2 1xPhospho [S/Y]; O95218-1 1xPhospho [S/Y]	[R].ENVEYIEREESDGEYDEFGR.[K]	1xPhospho [Y/S]	Used	1	2545	141.9	100.5	97.7	86.9	94.7	53.4	151.8	87.5	85.6		High	High	High	Peak Found	High	Peak Found	High	High	High
O95218-2	K.EVEDKESEGEEEDEDEDLSK.Y	[147-166]	O95218-2 1xPhospho [S153]; O95218-1 1xPhospho [S153]	[K].EVEDKESEGEEEDEDEDLSK.[Y]	1xPhospho [S7]	Used	1	2419.9	114.9	117.4	66.4	67.3	102.9	63.8	122.5	123.4	121.4		High	High	High	High	High	High	High	High	High
O95218-2	K.EVEDKESEGEEEDEDEDLSKYK.L	[147-168]	O95218-2 1xPhospho [S153]; O95218-1 1xPhospho [S153]	[K].EVEDKESEGEEEDEDEDLSKYK.[L]	1xPhospho [S7]	Used	2	2711.06	148	88.9	84.8	63.3	107.9	61.1	80	116.6	149.5		High	Peak Found	Peak Found	Peak Found	High	Peak Found	Peak Found	High	Peak Found
O95218-2	K.YNLDASEEEDSNKKK.S	[183-197]	O95218-2 1xPhospho [S188]; O95218-1 1xPhospho [S188]	[K].YNLDASEEEDSNKKK.[S]	1xPhospho [S6]	Used	2	1849.79	145.6	86.9	67.3	74.7	103.7	73.9	80.8	136.3	130.8		Peak Found	High	High	High	High	Peak Found	Peak Found	High	High
O95218-2	K.YNLDASEEEDSNKK.K	[183-196]	O95218-2 1xPhospho [S188]; O95218-1 1xPhospho [S188]	[K].YNLDASEEEDSNKK.[K]	1xPhospho [S6]	Used	1	1721.69	134.2	124.4	82.1	73.1	77.3	70.9	101.7	117	119.3		Peak Found	High	Peak Found	High	High	High	High	High	High
O95218-2	K.YNLDASEEEDSNK.K	[183-195]	O95218-2 1xPhospho [S188]; O95218-1 1xPhospho [S188]	[K].YNLDASEEEDSNK.[K]	1xPhospho [S6]	Used	0	1593.6		109.9	75.9	48.3	88.8	85.6	190.8	163.6	137.2		Not Found	High	Peak Found	Peak Found	Peak Found	Peak Found	Peak Found	Peak Found	Peak Found
O95218-2	R.SRSPESQVIGENTK.Q	[305-318]	O95218-2 1xPhospho [S307]	[R].SRSPESQVIGENTK.[Q]	1xPhospho [S3]	Used	1	1611.74	84.3	61.4		131.8	161.7	126.5	144.6	96.1	93.6		Peak Found	Peak Found	Not Found	Peak Found	High	Peak Found	Peak Found	Peak Found	Peak Found
O95235	K.EHSLQVSPSLEK.G	[526-537]	O95235 1xPhospho [S532]; O95235-2 1xPhospho [S514]	[K].EHSLQVSPSLEK.[G]	1xPhospho [S7]	Used	0	1433.67	86.2	90.3	80.3	86.5	81.8	95.4	117.7	161.5	100.3		Peak Found	Peak Found	Peak Found	Peak Found	Peak Found	Peak Found	Peak Found	High	High
O95239-1	K.NQSLVEENEK.L	[392-401]	Q2VIQ3 1xPhospho [S394]; O95239-2 1xPhospho [S394]; O95239-1 1xPhospho [S394]	[K].NQSLVEENEK.[L]	1xPhospho [S3]	Used	0	1269.54		86	69.2	138.6	151	164.8	141	149.3			Not Found	Peak Found	Peak Found	Peak Found	High	High	High	Peak Found	Not Found
O95239-1	R.TFSLTEVR.G	[799-806]	O95239-2 1xPhospho [S801]; O95239-1 1xPhospho [S801]	[R].TFSLTEVR.[G]	1xPhospho [S3]	Used	0	1032.48	65.8	83.4	58.3	101.9	72.8	89.1	117.4	171.5	139.8		High	High	Peak Found	Peak Found	High	Peak Found	High	High	Peak Found
O95243	R.SLSSGSNFCSEQK.T	[316-328]	O95243-2 1xPhospho [S]; O95243 1xPhospho [S]; O95243-5 1xPhospho [S]; O95243-3 1xPhospho [S]	[R].SLSSGSNFCSEQK.[T]	1xCarbamidomethyl [C9]; 1xPhospho [S]	Used	0	1510.59				130	77.2	98.7	163.1	213.9	217.1		Not Found	Not Found	Not Found	Peak Found	Peak Found	High	High	Peak Found	High
O95251-1	R.SQQQPTPVTPK.K	[80-90]	O95251-1 1xPhospho [T88]; O95251-4 1xPhospho [T88]; O95251-2 1xPhospho [T88]	[R].SQQQPTPVTPK.[K]	1xPhospho [T9]	Used	0	1290.61	50	101.2	72.3	79.5	53.4	60	72.6	271.8	139.2		Peak Found	Peak Found	Peak Found	Peak Found	Peak Found	Peak Found	Peak Found	High	High
O95251-1	R.SSGSETEQVVDFSDR.E	[99-113]	O95251-1 1xPhospho [S/T]; O95251-4 1xPhospho [S/T]; O95251-2 1xPhospho [S/T]	[R].SSGSETEQVVDFSDR.[EG]	1xPhospho [S/T]	Used	0	1722.69	80.9	151.4	134	111.4	106.4	112.8	86	62.8	54.4		High	High	Peak Found	High	Peak Found	Peak Found	Peak Found	Peak Found	Peak Found
O95292	K.SLSSSLDDTEVKK.V	[156-168]	O95292 1xPhospho [S]	[K].SLSSSLDDTEVKK.[V]	1xPhospho [S]	Used	1	1488.68	144.8	135.2	101.4	129.7	128.1	138.2	37.5	40.7	44.4		High	High	High	High	High	High	High	High	High
O95292	K.SLSSSLDDTEVK.K	[156-167]	O95292 1xPhospho [S]	[K].SLSSSLDDTEVK.[K]	1xPhospho [S]	Used	0	1360.59	115.8	165.7	99.5	142.3	122.8	173.8	27.7	32.4	19.9		Peak Found	High	Peak Found	High	High	High	Peak Found	Peak Found	Peak Found
O95295	-.MAGAGSAAVSGAGTPVAGPTGR.D	[1-22]	O95295 1xPhospho [T/S]; 1xMet-loss+Acetyl [N-Term]	[-].MAGAGSAAVSGAGTPVAGPTGR.[D]	1xPhospho [T/S]; 1xMet-loss+Acetyl [N-Term]	Used	0	1833.85	23.4	82.2	69.9	84.7	123.9	141.5	94.2	139.8	140.3		Peak Found	High	Peak Found	Peak Found	High	High	High	High	Peak Found
O95297-1	K.SESVVYADIR.K	[258-267]	O95297-4 1xPhospho [Y139]; O95297-5 1xPhospho [Y113]; O95297-1 1xPhospho [Y263]; O95297-2 1xPhospho [Y262]	[K].SESVVYADIR.[K]	1xPhospho [Y6]	Used	0	1218.54	139.6	162.8	218.8	41.1	22.9	46.8	77.1	109.5	81.5		High	High	High	High	High	High	High	High	High
O95297-1	R.DYTGCSTSESLSPVKQAPR.K	[199-217]	O95297-4 1xPhospho [S86]; O95297-1 1xPhospho [S210]; O95297-2 1xPhospho [S209]	[R].DYTGCSTSESLSPVKQAPR.[K]	1xCarbamidomethyl [C5]; 1xPhospho [S12]	Used	1	2162.94	23.6	169.6	185.1	64.9	61.4	49.5	94.7	132.8	118.5		Peak Found	Peak Found	High	Peak Found	Peak Found	Peak Found	Peak Found	Peak Found	Peak Found
O95297-1	R.DYTGCSTSESLSPVK.Q	[199-213]	O95297-4 1xPhospho [S]; O95297-1 1xPhospho [S]; O95297-2 1xPhospho [S]	[R].DYTGCSTSESLSPVK.[Q]	1xCarbamidomethyl [C5]; 1xPhospho [S]	Used	0	1710.69		173.4	124.9	91.1	77.6	72.3	121.2	138.4	101.2		Not Found	High	Peak Found	Peak Found	High	Peak Found	High	High	Peak Found
O95359	K.LDNTPASPPRSPAEPNDIPIAK.G	[2311-2332]	O95359-3 2xPhospho [S2321; T/S]; O95359-2 2xPhospho [S25; T/S]; O95359 2xPhospho [S2321; T/S]; O95359-6 2xPhospho [S399; T/S]; O95359-5 2xPhospho [S467; T/S]; O95359-1 2xPhospho [S399; T/S]	[K].LDNTPASPPRSPAEPNDIPIAK.[G]	2xPhospho [S11; T/S]	Used	1	2460.12		118	114.4		147.7	125.1	185.2	93.8	115.9		Not Found	High	High	Not Found	Peak Found	High	Peak Found	High	High
O95359	R.VQNSPPVGR.K	[2223-2231]	O95359-3 1xPhospho [S2226]; O95359 1xPhospho [S2226]; O95359-6 1xPhospho [S304]; O95359-5 1xPhospho [S372]; O95359-1 1xPhospho [S304]	[R].VQNSPPVGR.[K]	1xPhospho [S4]	Used	0	1033.48	107.7	83.3	98.2	138.1	88.9	117.9	86.8	102.6	76.5		High	Peak Found	Peak Found	Peak Found	Peak Found	Peak Found	Peak Found	Peak Found	Peak Found
O95359	K.TPEKLDNTPASPPRSPAEPNDIPIAK.G	[2307-2332]	O95359-3 1xPhospho [S2321]; O95359-2 1xPhospho [S25]; O95359 1xPhospho [S2321]; O95359-6 1xPhospho [S399]; O95359-5 1xPhospho [S467]; O95359-1 1xPhospho [S399]	[K].TPEKLDNTPASPPRSPAEPNDIPIAK.[G]	1xPhospho [S15]	Used	2	2835.39			102.7	253.5	219.5	324.4					Not Found	Not Found	Peak Found	Peak Found	High	Peak Found	Not Found	Not Found	Not Found
O95359	K.FSSPTEELDYR.N	[2510-2520]	O95359-3 1xPhospho [S/T]; O95359-2 1xPhospho [S/T]; O95359 1xPhospho [S/T]; O95359-6 1xPhospho [S/T]; O95359-5 1xPhospho [S/T]; O95359-1 1xPhospho [S/T]	[K].FSSPTEELDYR.[N]	1xPhospho [S/T]	Used	0	1423.58	83.4	81.9	98.2	143.5	95.4	135.4	78.1	94.7	89.4		Peak Found	High	High	High	High	High	High	High	High
O95359	R.MSESPTPCSGSSFEETEALVNTAAK.N	[2566-2590]	O95359-3 1xPhospho [T2571]; O95359-2 1xPhospho [T271]; O95359 1xPhospho [T2571]; O95359-6 1xPhospho [T649]; O95359-5 1xPhospho [T717]; O95359-1 1xPhospho [T649]	[R].MSESPTPCSGSSFEETEALVNTAAK.[N]	1xCarbamidomethyl [C8]; 1xPhospho [T6]; 1xOxidation [M1]	Used	0	2726.12		57.5	94.5	99.9	132.3	149.3	89.2	127.3	149.9		Not Found	Peak Found	Peak Found	Peak Found	High	Peak Found	Peak Found	Peak Found	Peak Found
O95365	R.VRGGAPDPSPGATATPGAPAQPSSPDAR.R	[503-530]	O95365 1xPhospho [T/S]	[R].VRGGAPDPSPGATATPGAPAQPSSPDAR.[R]	1xPhospho [T/S]	Used	1	2665.24	129.2	109.2	130.5	174.9	66.6	68.9	52.9	78.8	88.9		High	High	High	High	High	Peak Found	Peak Found	High	High
O95365	R.AGAAAGDSDEESRADDK.G	[330-346]	O95365 1xPhospho [S337]	[R].AGAAAGDSDEESRADDK.[G]	1xPhospho [S8]	Used	1	1744.67	88.3	93.2	54.2	145.5	137.1	121.9	83	95.4	81.5		High	Peak Found	High	High	High	High	High	High	High
O95365	R.GGAPDPSPGATATPGAPAQPSSPDAR.R	[505-530]	O95365 1xPhospho [S526]	[R].GGAPDPSPGATATPGAPAQPSSPDAR.[R]	1xPhospho [S22]	Used	0	2410.07	109.6	135.1	102.5	192	57.7	51.2	87.3	91.9	72.7		High	Peak Found	Peak Found	High	Peak Found	Peak Found	Peak Found	Peak Found	Peak Found
O95365	K.HFKDEDEDEDVASPDGLGR.L	[537-555]	O95365 1xPhospho [S549]	[K].HFKDEDEDEDVASPDGLGR.[L]	1xPhospho [S13]	Used	1	2210.89	279.9	55.8	150.9	179.9	101.9				131.6		High	Peak Found	Peak Found	High	Peak Found	Not Found	Not Found	Not Found	Peak Found
O95391	K.LVEQANSPK.H	[209-217]	O95391 1xPhospho [S215]	[K].LVEQANSPK.[H]	1xPhospho [S7]	Used	0	1065.5	90.7	95.2	53.2	90.9	63.2	75.7	119.3	184.9	126.9		Peak Found	Peak Found	High	High	Peak Found	Peak Found	Peak Found	Peak Found	Peak Found
O95400	R.KGPGQPSSPQR.L	[188-198]	O95400 1xPhospho [S194]	[R].KGPGQPSSPQR.[L]	1xPhospho [S7]	Used	1	1218.56	18.1	121.8	9.1	198.1	217.7	119.6	7.8	148.4	59.4		Peak Found	Peak Found	Peak Found	High	Peak Found	High	Peak Found	Peak Found	Peak Found
O95400	K.HSLDSDEEEDDDDGGSSK.Y	[45-62]	O95400 1xPhospho [S49]	[K].HSLDSDEEEDDDDGGSSK.[Y]	1xPhospho [S5]	Used	0	2016.68	114.6	115.5	64.1	78.4	86	56.2	144.5	121	119.6		Peak Found	Peak Found	High	High	High	Peak Found	High	Peak Found	High
O95400	K.GKHSLDSDEEEDDDDGGSSK.Y	[43-62]	O95400 1xPhospho [S46]	[K].GKHSLDSDEEEDDDDGGSSK.[Y]	1xPhospho [S4]	Used	1	2201.8	155.6	80.5	91.9	67.1	76.7	53.7	94.3	146.3	133.9		High	Peak Found	High	Peak Found	Peak Found	Peak Found	Peak Found	Peak Found	Peak Found
O95400	R.KGPGQPSSPQRLDR.L	[188-201]	O95400 1xPhospho [S]	[R].KGPGQPSSPQRLDR.[L]	1xPhospho [S]	Used	2	1602.77	131.5	76.6	116.9	52.6	74.1	68.5	93.9	122.2	163.7		High	High	High	High	High	High	High	High	High
O95400	K.GPGQPSSPQRLDR.L	[189-201]	O95400 1xPhospho [S]	[K].GPGQPSSPQRLDR.[L]	1xPhospho [S]	Used	1	1474.68	82.8	114.3	120.1	60.8	29.7	28.1	141.4	160.5	162.3		High	High	High	Peak Found	Peak Found	Peak Found	Peak Found	Peak Found	Peak Found
O95425-3	K.YGSFEEAEASYPILNR.A	[939-954]	O95425-2 1xPhospho [S542]; O95425 1xPhospho [S968]; O95425-3 1xPhospho [S941]; O95425-4 1xPhospho [S936]	[K].YGSFEEAEASYPILNR.[A]	1xPhospho [S3]	Used	0	1925.83	56.4	117.4	51.7	149.1	87.1	74.7	118.8	117	127.8		Peak Found	Peak Found	Peak Found	Peak Found	Peak Found	Peak Found	Peak Found	High	Peak Found
O95425-3	R.DSSFTEVPRSPK.H	[236-247]	O95425-2 1xPhospho [S245]; O95425 1xPhospho [S245]; O95425-3 1xPhospho [S245]; O95425-4 1xPhospho [S245]	[R].DSSFTEVPRSPK.[H]	1xPhospho [S10]	Used	1	1429.64		70.4	75.7	88.7	67.8	66	141.4	202.4	187.6		Not Found	Peak Found	Peak Found	High	High	Peak Found	Peak Found	High	Peak Found
O95425-3	R.QAHDLSPAAESSSTFSFSGR.D	[216-235]	O95425-2 1xPhospho [S]; O95425 1xPhospho [S]; O95425-3 1xPhospho [S]; O95425-4 1xPhospho [S]	[R].QAHDLSPAAESSSTFSFSGR.[D]	1xPhospho [S]	Used	0	2161.92	75.7	74.6		77.6	44.8	35	176.5	213.3	202.5		Peak Found	Peak Found	Not Found	Peak Found	Peak Found	Peak Found	Peak Found	High	High
O95425-3	R.SPSFGDPQLSPEARPR.V	[261-276]	O95425-2 1xPhospho [S]; O95425-3 1xPhospho [S]	[R].SPSFGDPQLSPEARPR.[CV]	1xPhospho [S]	Used	0	1820.83	74	66.1	73.1	33.6	41.2	47.1	178.3	208.4	178.1		Peak Found	Peak Found	High	Peak Found	Peak Found	Peak Found	High	High	High
O95429	R.SSGNSPTPVSR.W	[175-185]	O95429-2 1xPhospho [S143]; O95429 1xPhospho [S179]	[R].SSGNSPTPVSR.[W]	1xPhospho [S5]	Used	0	1168.5	74.1	170.5	65.9	59.5	66.9	49.2	18.5	260.6	134.8		Peak Found	Peak Found	Peak Found	Peak Found	Peak Found	Peak Found	Peak Found	High	High
O95453	K.KELSPAGSISK.N	[616-626]	O95453-4 1xPhospho [S444]; O95453-2 1xPhospho [S558]; O95453-3 1xPhospho [S573]; O95453 1xPhospho [S619]	[K].KELSPAGSISK.[N]	1xPhospho [S4]	Used	1	1196.59	146.3	130.8	124.3	81.7	67.8	87.3	77.5	105.4	78.9		Peak Found	Peak Found	High	Peak Found	Peak Found	Peak Found	High	Peak Found	Peak Found
O95453	K.ELSPAGSISK.N	[617-626]	O95453-4 1xPhospho [S444]; O95453-2 1xPhospho [S558]; O95453-3 1xPhospho [S573]; O95453 1xPhospho [S619]	[K].ELSPAGSISK.[N]	1xPhospho [S3]	Used	0	1068.5	123.1	135.7	122.9	87.5	65.5	89.3	86.5	110.8	78.7		High	High	High	High	High	High	High	High	High
O95453	R.SQANGAGALSYVSPNTSK.C	[151-168]	O95453-2 1xPhospho [Y/S]; O95453-3 1xPhospho [Y/S]; O95453 1xPhospho [Y/S]	[R].SQANGAGALSYVSPNTSK.[C]	1xDeamidated [N4]; 1xPhospho [Y/S]	Used	0	1832.81		165.8	108.5	46.6	98.5	103.8	145.4	138.6	92.8		Not Found	High	Peak Found	High	Peak Found	Peak Found	High	Peak Found	Peak Found
O95466	K.EAAAQEAGADTPGKGEPPAPKSPPK.A	[1010-1034]	O95466 1xPhospho [S1031]; O95466-2 1xPhospho [S1031]; O95466-3 1xPhospho [S1031]	[K].EAAAQEAGADTPGKGEPPAPKSPPK.[A]	1xPhospho [S22]	Used	2	2481.17							274.1	285.7	340.2		Not Found	Not Found	Not Found	Not Found	Not Found	Not Found	High	High	High
O95544	R.SLHGPCPVTTFGPK.A	[64-77]	O95544-2 1xPhospho [S64]; O95544 1xPhospho [S64]	[R].SLHGPCPVTTFGPK.[A]	1xCarbamidomethyl [C6]; 1xPhospho [S1]	Used	0	1577.72	154.5	243	195.4		86.3	102.6		118.2			Peak Found	High	Peak Found	Not Found	Peak Found	Peak Found	Not Found	Peak Found	Not Found
O95571	R.GGSGAPILLR.Q	[17-26]	O95571 1xPhospho [S19]	[R].GGSGAPILLR.[Q]	1xPhospho [S3]	Used	0	1020.52				249.3	319.3	331.4					Not Found	Not Found	Not Found	Peak Found	Peak Found	High	Not Found	Not Found	Not Found
O95628-1	K.ELSVQDQPSLSPTSLQNSSSHTTTAK.G	[422-447]	O95628-2 1xPhospho [S421]; O95628-1 1xPhospho [S424]; O95628-6 1xPhospho [S424]; O95628-10 1xPhospho [S424]; O95628-9 1xPhospho [S421]; O95628-7 1xPhospho [S424]; O95628-3 1xPhospho [S407]; O95628-8 1xPhospho [S421]; O95628-4 1xPhospho [S424]	[K].ELSVQDQPSLSPTSLQNSSSHTTTAK.[G]	1xPhospho [S3]	Used	0	2823.3	99.8	131.6	112.4	57.9	68.8	59.6	92	131.9	146		Peak Found	Peak Found	High	High	High	Peak Found	Peak Found	Peak Found	High
O95639	R.SSSLIQLTSQNSSPNQQR.T	[200-217]	O95639 1xPhospho [S201]	[R].SSSLIQLTSQNSSPNQQR.[T]	1xDeamidated [Q6]; 1xPhospho [S2]	Not Used	0	2055.93										No Quan Values	Not Found	Not Found	Not Found	Not Found	Not Found	Not Found	Not Found	Not Found	High
O95639	R.SSSLIQLTSQNSSPNQQR.T	[200-217]	O95639 1xPhospho [S]	[R].SSSLIQLTSQNSSPNQQR.[T]	1xPhospho [S]	Used	0	2054.95	108.1	243.2	103.2	74.9	67.9	81.1	38.8	92.3	90.5		High	High	Peak Found	Peak Found	High	High	Peak Found	Peak Found	Peak Found
O95671-1	K.HDSIPAADTFEDLSDVEGGGSEPTQR.D	[226-251]	O95671-2 1xPhospho [T/S]; O95671-3 1xPhospho [T/S]; O95671-1 1xPhospho [T/S]	[K].HDSIPAADTFEDLSDVEGGGSEPTQR.[D]	1xPhospho [T/S]	Used	0	2810.18				136.3	137.3	76.7	270.9	121.5	157.4		Not Found	Not Found	Not Found	High	Peak Found	High	High	Peak Found	Peak Found
O95671-1	R.VVLASASPR.R	[15-23]	O95671-2 1xPhospho [S19]; O95671-1 1xPhospho [S19]	[R].VVLASASPR.[R]	1xPhospho [S5]	Used	0	979.497	129.4	149.5	130	45.3	54.7	76.4	96.6	120.1	97.9		High	High	Peak Found	Peak Found	Peak Found	Peak Found	High	Peak Found	Peak Found
O95674-1	K.VDGETASDSESR.A	[27-38]	O95674-1 1xPhospho [S33]	[K].VDGETASDSESR.[A]	1xPhospho [S7]	Used	0	1332.5	82.9	123.4	35.5	104.9	91.4	83.8	90.1	166.2	122		High	Peak Found	Peak Found	Peak Found	Peak Found	Peak Found	High	Peak Found	Peak Found
O95674-1	K.VDGETASDSESRAESAPLPVSADDTPEVLNR.A	[27-57]	O95674-1 1xPhospho [S]	[K].VDGETASDSESRAESAPLPVSADDTPEVLNR.[A]	1xPhospho [S]	Used	1	3294.46	130.7	99.6	52	86.3	83.5	66.1	154.9	121	105.7		Peak Found	High	Peak Found	Peak Found	Peak Found	Peak Found	High	Peak Found	High
O95674-1	R.VAHEPVAPPEDKESESEAKVDGETASDSESR.A	[8-38]	O95674-1 1xPhospho [S/T]	[R].VAHEPVAPPEDKESESEAKVDGETASDSESR.[A]	1xPhospho [S/T]	Used	2	3362.45	272.3		108.8	85.4	122.2	59.9		94.2	157.1		High	Not Found	High	Peak Found	High	Peak Found	Not Found	Peak Found	High
O95684	K.GPTTGEGALDLSDVHSPPKSPEGK.T	[141-164]	O95684-2 2xPhospho [S160; S/T]; O95684 2xPhospho [S160; S/T]	[K].GPTTGEGALDLSDVHSPPKSPEGK.[T]	2xPhospho [S20; S/T]	Used	1	2536.1	71.3	100.2	104.7	105	131.7	95.6	115.2	76.9	99.5		Peak Found	Peak Found	Peak Found	High	High	Peak Found	Peak Found	Peak Found	High
O95684	K.EKGPTTGEGALDLSDVHSPPKSPEGK.T	[139-164]	O95684-2 2xPhospho [S156; S160]; O95684 2xPhospho [S156; S160]	[K].EKGPTTGEGALDLSDVHSPPKSPEGK.[T]	2xPhospho [S18; S22]	Used	2	2793.24	91.3	78	122.6	87.7	150.9	120	59.4	83.4	106.6		High	Peak Found	Peak Found	Peak Found	Peak Found	Peak Found	Peak Found	Peak Found	Peak Found
O95685	R.SLPSSPERR.Q	[74-82]	O95685 1xPhospho [S]	[R].SLPSSPERR.[Q]	1xPhospho [S]	Used	1	1108.51	31.2	32.3	35.8	233.8	257.9	255	17.7	19	17.3		Peak Found	Peak Found	Peak Found	High	High	High	Peak Found	Peak Found	Peak Found
O95685	R.ACRPPGSPGRAPPPTPAPSGCDPR.L	[40-63]	O95685 1xPhospho [S46]	[R].ACRPPGSPGRAPPPTPAPSGCDPR.[L]	2xCarbamidomethyl [C2; C21]; 1xPhospho [S7]	Used	1	2535.14	61	40.5	23.3	198.9	243.9	187.3	27.9	48.6	68.6		Peak Found	Peak Found	Peak Found	High	High	Peak Found	Peak Found	Peak Found	Peak Found
O95696-2	R.IVEYSPPSAPR.R	[124-134]	O95696-2 1xPhospho [Y/S]; O95696 1xPhospho [Y/S]	[R].IVEYSPPSAPR.[R]	1xPhospho [Y/S]	Used	0	1295.6	64.8	96	82.3	60.5	62.5	77.8	154.4	156.5	145.2		High	Peak Found	High	High	Peak Found	Peak Found	High	High	High
O95696-2	R.VHGEPTSDLSDID.-	[1177-1189]	O95696-2 1xPhospho [T/S]; O95696 1xPhospho [T/S]	[R].VHGEPTSDLSDID.[-]	1xPhospho [T/S]	Used	0	1464.59	40.2	153	119.2	76.6	83.1	95.5	146	96.6	89.8		Peak Found	Peak Found	High	Peak Found	High	Peak Found	High	Peak Found	Peak Found
O95696-2	K.NTETQPTSPQLGTK.T	[899-912]	O95696-2 1xPhospho [S906]	[K].NTETQPTSPQLGTK.[T]	1xPhospho [S8]	Used	0	1581.72		90.6	73.8	46.9			257.9	216	214.8		Not Found	Peak Found	Peak Found	Peak Found	Not Found	Not Found	High	Peak Found	Peak Found
O95696-2	R.SRSTCGDSEVEEESPGKR.L	[932-949]	O95696-2 1xPhospho [S]; O95696 1xPhospho [S]	[R].SRSTCGDSEVEEESPGKR.[L]	1xCarbamidomethyl [C5]; 1xPhospho [S]	Used	2	2089.85	156.2	87.8	104.7	108.8	124.2	80.9	54.4	81.9	101.1		High	Peak Found	High	Peak Found	Peak Found	Peak Found	Peak Found	Peak Found	High
O95758-1	R.DRPPCSPSR.V	[20-28]	O95758-2 1xPhospho [S28]; O95758-4 1xPhospho [S62]; O95758-5 1xPhospho [S59]; O95758-1 1xPhospho [S25]; O95758 1xPhospho [S56]; O95758-6 1xPhospho [S28]	[R].DRPPCSPSR.[V]	1xCarbamidomethyl [C5]; 1xPhospho [S6]	Used	0	1151.47	31	88.5	29.6	134.1	190.1	128.9	35.2	143.8	118.7		High	Peak Found	Peak Found	Peak Found	Peak Found	Peak Found	Peak Found	High	Peak Found
O95785	K.NPEDKSPQLSLSPRPASPK.A	[1001-1019]	O95785-4 1xPhospho [S201]; O95785 1xPhospho [S1017]; O95785-3 1xPhospho [S198]	[K].NPEDKSPQLSLSPRPASPK.[A]	1xPhospho [S17]	Used	1	2128.04	68.9	74.5	116.8	99.2	116.7	100.7	71.5	105.4	146.3		Peak Found	Peak Found	Peak Found	Peak Found	High	Peak Found	Peak Found	Peak Found	Peak Found
O95793	K.TKPIVKPQTSPEYGQGINPISR.L	[269-290]	O95793 1xPhospho [T/S]; O95793-2 1xPhospho [T/S]; O95793-3 1xPhospho [T/S]	[K].TKPIVKPQTSPEYGQGINPISR.[L]	1xPhospho [T/S]	Used	0	2490.28	101.7	108.3	160.8	38.8	99.7	69.8	76	80.6	164.4		Peak Found	Peak Found	High	Peak Found	High	High	Peak Found	High	High
O95817	R.SQSPAASDCSSSSSSASLPSSGR.S	[171-193]	O95817 1xPhospho [S171]	[R].SQSPAASDCSSSSSSASLPSSGR.[S]	1xCarbamidomethyl [C9]; 1xDeamidated [Q2]; 1xPhospho [S1]	Not Used	0	2280.89										No Quan Values	Not Found	High	Not Found	Not Found	Not Found	Not Found	Not Found	Not Found	Not Found
O95817	R.SSLGSHQLPR.G	[194-203]	O95817 1xPhospho [S194]	[R].SSLGSHQLPR.[G]	1xPhospho [S1]	Used	0	1161.54	345.2	261.1	107.1	43	43.7	33.3	18.8	28.6	19.2		High	High	High	Peak Found	Peak Found	Peak Found	Peak Found	Peak Found	Peak Found
O95817	R.SSTPLHSPSPIR.V	[283-294]	O95817 1xPhospho [S]	[R].SSTPLHSPSPIR.[V]	1xPhospho [S]	Used	0	1358.65	139.2	145.6	126.1	122.7	106.7	129.2	13.8	53.7	63		High	Peak Found	High	High	High	High	High	High	High
O95817	R.SQSPAASDCSSSSSSASLPSSGR.S	[171-193]	O95817 1xPhospho [S]	[R].SQSPAASDCSSSSSSASLPSSGR.[S]	1xCarbamidomethyl [C9]; 1xPhospho [S]	Used	0	2279.91	157.5	232	164	59.1	84.9	81.7	36.6	48.1	36		High	High	High	High	High	High	High	High	Peak Found
O95817	K.VPPAPVPCPPPSPGPSAVPSSPK.S	[366-388]	O95817 2xPhospho [S]	[K].VPPAPVPCPPPSPGPSAVPSSPK.[S]	1xCarbamidomethyl [C8]; 2xPhospho [S]	Used	0	2379.09	160.2	324.1	248		20.3	17.2	100.9	14.6	14.7		High	High	High	Not Found	Peak Found	Peak Found	Peak Found	Peak Found	Peak Found
O95817	K.VPPAPVPCPPPSPGPSAVPSSPK.S	[366-388]	O95817 1xPhospho [S]	[K].VPPAPVPCPPPSPGPSAVPSSPK.[S]	1xCarbamidomethyl [C8]; 1xPhospho [S]	Used	0	2299.12	171.8	227.6	173.2	70.4	47.4	61	48.2	46.8	53.7		High	High	High	High	Peak Found	High	High	High	High
O95819	R.AASSLNLSNGETESVK.T	[798-813]	O95819-5 1xPhospho [S800]; O95819-3 1xPhospho [S886]; O95819 1xPhospho [S805]; O95819-2 1xPhospho [S778]; O95819-4 1xPhospho [S723]; O95819-6 1xPhospho [S775]; O95819-3 1xPhospho [S885]; O95819-2 1xPhospho [S777]	[R].AASSLNLSNGETESVK.[T]	1xPhospho [S8]	Used	0	1686.76	123.3	158.5	100.7				149.3	223.9	144.4		High	Peak Found	Peak Found	Not Found	Not Found	Not Found	High	Peak Found	Peak Found
O95819	R.TTSRSPVLSR.R	[627-636]	O95819-5 1xPhospho [S623]; O95819-3 1xPhospho [S708]; O95819 1xPhospho [S631]; O95819-2 1xPhospho [S600]; O95819-4 1xPhospho [S546]; O95819-6 1xPhospho [S600]; O95819-3 1xPhospho [S708]; O95819-2 1xPhospho [S600]	[R].TTSRSPVLSR.[R]	1xPhospho [S5]	Used	1	1183.58	142.5	180.2	149	27.3	16.6	19.1	98	135.3	131.9		High	Peak Found	Peak Found	Peak Found	Peak Found	Peak Found	Peak Found	Peak Found	Peak Found
O95819	K.SSSSFTPFIDPR.L	[852-863]	O95819-5 1xPhospho [S847]; O95819-3 1xPhospho [S933]; O95819 1xPhospho [S852]; O95819-2 1xPhospho [S825]; O95819-4 1xPhospho [S770]; O95819-6 1xPhospho [S886]; O95819-3 1xPhospho [S932]; O95819-2 1xPhospho [S824]	[K].SSSSFTPFIDPR.[L]	1xPhospho [S1]	Used	0	1420.61	89.5	107.2	137.7				199.4	172.3	193.9		Peak Found	Peak Found	Peak Found	Not Found	Not Found	Not Found	High	Peak Found	Peak Found
O95835	K.QITTSPITVR.K	[609-618]	O95835 1xPhospho [S613]; O95835-2 1xPhospho [S613]	[K].QITTSPITVR.[K]	1xPhospho [S5]	Used	0	1195.61	76	80	63.1	129.4	121.9	140.3	100.7	104.5	84.2		Peak Found	High	High	High	High	Peak Found	Peak Found	Peak Found	Peak Found
O95835	R.SNSFNNPLGNR.A	[462-472]	O95835 1xPhospho [S]; O95835-2 1xPhospho [S]	[R].SNSFNNPLGNR.[A]	1xPhospho [S]	Used	0	1299.55	59.8	126.1	87.9	112.8	104.4	142.2	88.1	89.5	89.2		High	High	High	High	High	High	Peak Found	High	High
O95983-1	R.VRYDSSNQVK.G	[81-90]	O95983-1 1xPhospho [S]; O95983-2 1xPhospho [S]	[R].VRYDSSNQVK.[G]	1xPhospho [S/Y]	Used	1	1275.57	109.7	104.7	96.4	72.2	55.7	66.5	91.5	147.5	155.8		High	Peak Found	High	Peak Found	Peak Found	Peak Found	Peak Found	Peak Found	Peak Found
O95997	K.LFQLGPPSPVK.M	[158-168]	O95997 1xPhospho [S165]; Q9NZH5 1xPhospho [S165]; Q9NZH5-2 1xPhospho [S165]	[K].LFQLGPPSPVK.[M]	1xPhospho [S8]	Used	0	1262.65	61.2	74.2	51.2	100.9	77.7	79.5	127.1	209.5	118.5		Peak Found	Peak Found	Peak Found	Peak Found	High	Peak Found	High	Peak Found	Peak Found
O95999	R.SNSDESNFSEK.L	[136-146]	O95999 1xPhospho [S]	[R].SNSDESNFSEK.[L]	1xPhospho [S]	Used	0	1323.47	81.2	106.8	116.9	96.5	86.1	111.4	105.7	101.8	93.7		Peak Found	Peak Found	High	High	High	High	High	High	High
O96013-1	R.SNSLRRDSPPPPAR.A	[97-110]	O96013-1 2xPhospho [S99; S104]; O96013-4 2xPhospho [S99; S104]; O96013-2 2xPhospho [S99; S104]	[R].SNSLRRDSPPPPAR.[A]	2xPhospho [S3; S8]	Used	2	1709.75			145.6	255.9	237.9	232.1	28.5				Not Found	Not Found	Peak Found	High	High	High	Peak Found	Not Found	Not Found
O96013-1	R.RKSLVGTPYWMAPELISR.L	[472-489]	O96013-1 1xPhospho [T478]; O96013-4 1xPhospho [T388]; O96013-2 1xPhospho [T313]; O96013-3 1xPhospho [T325]	[R].RKSLVGTPYWMAPELISR.[L]	1xPhospho [T7]	Used	2	2184.1	67.2	155.3	138.8	150.9	113.3	95.5	78	49.1	51.9		Peak Found	Peak Found	High	Peak Found	High	Peak Found	Peak Found	Peak Found	Peak Found
O96013-1	R.DKRPLSGPDVGTPQPAGLASGAK.L	[176-198]	O96013-1 1xPhospho [S181]	[R].DKRPLSGPDVGTPQPAGLASGAK.[L]	1xPhospho [S6]	Used	1	2299.14	110.7	93.7	111.3	131.9	116.9	105.1	50.3	81.9	98.2		High	Peak Found	Peak Found	High	High	High	Peak Found	High	Peak Found
O96013-1	R.RDSPPPPAR.A	[102-110]	O96013-1 1xPhospho [S104]; O96013-4 1xPhospho [S104]; O96013-2 1xPhospho [S104]	[R].RDSPPPPAR.[A]	1xPhospho [S3]	Used	1	1072.49	7.6	69.1	21.6	272.2	243.4	175.6	10.2	75	25.5		Peak Found	Peak Found	Peak Found	High	High	High	Peak Found	Peak Found	Peak Found
O96013-1	K.SLVGTPYWMAPELISR.L	[474-489]	O96013-1 1xPhospho [S474]; O96013-4 1xPhospho [S384]; O96013-2 1xPhospho [S309]; O96013-3 1xPhospho [S321]	[K].SLVGTPYWMAPELISR.[L]	1xPhospho [S1]	Used	0	1899.91	54.8	180	94.1	223.3	143.8	136.5	67.5				Peak Found	High	High	High	High	High	Peak Found	Not Found	Not Found
O96013-1	R.SNSLRRDSPPPPAR.A	[97-110]	O96013-1 1xPhospho [S97]; O96013-4 1xPhospho [S97]; O96013-2 1xPhospho [S97]	[R].SNSLRRDSPPPPAR.[A]	1xPhospho [S1]	Used	2	1629.79		93	205.2	73.8	132.4	237.4		50.3	107.8		Not Found	Peak Found	High	Peak Found	Peak Found	High	Not Found	Peak Found	Peak Found
O96019-1	K.EAVREGSPANWK.R	[227-238]	O96019-2 1xPhospho [S191]; O96019-1 1xPhospho [S233]	[K].EAVREGSPANWK.[R]	1xPhospho [S7]	Used	1	1423.64	41.1	51	46.5	83.4	111.6	156.9	102.7	162.6	144.2		Peak Found	High	Peak Found	High	High	Peak Found	Peak Found	Peak Found	Peak Found
O96019-1	R.EGSPANWKR.K	[231-239]	O96019-2 1xPhospho [S191]; O96019-1 1xPhospho [S233]	[R].EGSPANWKR.[K]	1xPhospho [S3]	Used	1	1124.49	57.9	52.1	32.1	97.6	128.4	115.4	102.9	162.3	151.3		Peak Found	High	High	High	High	High	High	High	High
O96028-1	K.GIGTPPNTTPIKNGSPEIK.L	[107-125]	O96028-5 1xPhospho [T/S]; O96028-3 1xPhospho [T/S]; O96028-7 1xPhospho [T/S]; O96028-6 1xPhospho [T/S]; O96028-1 1xPhospho [T/S]	[K].GIGTPPNTTPIKNGSPEIK.[L]	1xPhospho [T/S]	Used	1	2001.01	40.1	58	73.4	62.6	68.1	94.5	191.1	176.9	135.4		Peak Found	Peak Found	Peak Found	Peak Found	Peak Found	Peak Found	High	High	High
O96028-1	R.GVGSPPGR.K	[434-441]	O96028-5 1xPhospho [S437]; O96028-3 1xPhospho [S437]; O96028-6 1xPhospho [S437]; O96028-1 1xPhospho [S437]	[R].GVGSPPGR.[K]	1xPhospho [S4]	Used	0	806.356	72.1		76.3	92	55	108	145	150.4	201.2		High	Not Found	Peak Found	High	Peak Found	Peak Found	High	High	High
O96028-1	K.GIGTPPNTTPIKNGSPEIK.L	[107-125]	O96028-5 1xPhospho [T/S]; O96028-3 1xPhospho [T/S]; O96028-7 1xPhospho [T/S]; O96028-6 1xPhospho [T/S]; O96028-1 1xPhospho [T/S]	[K].GIGTPPNTTPIKNGSPEIK.[L]	1xDeamidated [N]; 1xPhospho [T/S]	Used	1	2001.99		66.5	86.9	56.1	81.3	95.7	173.5	178.7	161.3		Not Found	Peak Found	High	Peak Found	Peak Found	High	High	High	High
P00352	-.MSSSGTPDLPVLLTDLK.I	[1-17]	P00352 1xPhospho [S3]; 1xMet-loss+Acetyl [N-Term]	[-].MSSSGTPDLPVLLTDLK.[I]	1xPhospho [S3]; 1xMet-loss+Acetyl [N-Term]	Used	0	1764.87				321.7	257.7	320.6					Not Found	Not Found	Not Found	Peak Found	Peak Found	High	Not Found	Not Found	Not Found
P00519	K.GQGESDPLDHEPAVSPLLPR.K	[555-574]	P00519-2 1xPhospho [S588]; P00519 1xPhospho [S569]	[K].GQGESDPLDHEPAVSPLLPR.[K]	1xPhospho [S15]	Used	0	2194.02	81.1	86.3	87.5	94.1	104.8	125	91.5	122.1	107.5		Peak Found	High	High	Peak Found	High	Peak Found	High	High	High
P00533-1	R.ELVEPLTPSGEAPNQALLR.I	[687-705]	P00533-1 1xPhospho [T/S]	[R].ELVEPLTPSGEAPNQALLR.[I]	1xPhospho [T/S]	Used	0	2114.05	223.9	235.6	155.8	115.1	80.3	78		11.3			Peak Found	High	High	Peak Found	Peak Found	Peak Found	Not Found	Peak Found	Not Found
P00533-1	R.TPLLSSLSATSNNSTVACIDR.N	[1032-1052]	P00533-1 1xPhospho [T1032]	[R].TPLLSSLSATSNNSTVACIDR.[N]	1xCarbamidomethyl [C18]; 1xPhospho [T1]	Used	0	2287.06	538.4	173.7	75.4			112.5					High	Peak Found	Peak Found	Not Found	Not Found	Peak Found	Not Found	Not Found	Not Found
P00558	K.ALESPERPFLAILGGAK.V	[200-216]	P00558-2 1xPhospho [S175]; P00558 1xPhospho [S203]	[K].ALESPERPFLAILGGAK.[V]	1xPhospho [S4]	Used	0	1848.96	47.7	62.3	66.5	95	73.7	92.1	322.4	68.5	71.8		Peak Found	Peak Found	High	High	High	High	High	Peak Found	High
P01106	K.KFELLPTPPLSPSRR.S	[52-66]	P01106-2 2xPhospho [T73; S79]; P01106 2xPhospho [T58; S64]	[K].KFELLPTPPLSPSRR.[S]	2xPhospho [T7; S13]	Used	2	1897.93	57.9	82.3	57.8	29.3	37.3	24.4	253.1	162.5	195.3		Peak Found	Peak Found	Peak Found	Peak Found	Peak Found	Peak Found	Peak Found	Peak Found	High
P01106	R.SGLCSPSYVAVTPFSLR.G	[67-83]	P01106-2 1xPhospho [S/Y]; P01106 1xPhospho [S/Y]	[R].SGLCSPSYVAVTPFSLR.[G]	1xCarbamidomethyl [C4]; 1xPhospho [S/Y]	Used	0	1920.89		151	54.4	9.2			484.3	106.2	94.9		Not Found	Peak Found	Peak Found	Peak Found	Not Found	Not Found	High	High	High
P02545	R.GRASSHSSQTQGGGSVTK.K	[400-417]	P02545-5 2xPhospho [S305; S307]; P02545-6 2xPhospho [S404; S406]; P02545-2 2xPhospho [S404; S406]; P02545-4 2xPhospho [S292; S294]; P02545 2xPhospho [S404; S406]; P02545-3 2xPhospho [S404; S406]	[R].GRASSHSSQTQGGGSVTK.[K]	2xPhospho [S5; S7]	Used	1	1891.77	77.8	107	52	216.6	165.6	240.4		12.5	28.1		Peak Found	Peak Found	Peak Found	High	Peak Found	High	Not Found	Peak Found	Peak Found
P02545	R.LRLSPSPTSQR.S	[387-397]	P02545-5 2xPhospho [S291; S293]; P02545-6 2xPhospho [S390; S392]; P02545-2 2xPhospho [S390; S392]; P02545-4 2xPhospho [S278; S280]; P02545 2xPhospho [S390; S392]; P02545-3 2xPhospho [S390; S392]	[R].LRLSPSPTSQR.[S]	2xPhospho [S4; S6]	Used	1	1401.63	82.4	77.6	72.7	150.6	219.2	171.5	45.7	38.9	41.3		High	High	High	High	High	High	High	High	High
P02545	R.ASSHSSQTQGGGSVTK.K	[402-417]	P02545-5 2xPhospho [S304; S305]; P02545-6 2xPhospho [S403; S404]; P02545-2 2xPhospho [S403; S404]; P02545-4 2xPhospho [S291; S292]; P02545 2xPhospho [S403; S404]; P02545-3 2xPhospho [S403; S404]	[R].ASSHSSQTQGGGSVTK.[K]	2xPhospho [S2; S3]	Used	0	1678.65		62.1	6.2	350	190.8	251.2		21.3	18.3		Not Found	Peak Found	Peak Found	Peak Found	High	Peak Found	Not Found	Peak Found	Peak Found
P02545	R.LRLSPSPTSQR.S	[387-397]	P02545-5 1xPhospho [S291]; P02545-6 1xPhospho [S390]; P02545-2 1xPhospho [S390]; P02545-4 1xPhospho [S278]; P02545 1xPhospho [S390]; P02545-3 1xPhospho [S390]	[R].LRLSPSPTSQR.[S]	1xPhospho [S4]	Used	1	1321.66	100.8	84.4	78.4	129.1	150.8	172.6	45.4	68.5	70		High	High	High	High	High	High	High	High	High
P02545	R.NKSNEDQSMGNWQIKR.Q	[456-471]	P02545-5 1xPhospho [S359]; P02545-6 1xPhospho [S458]; P02545-2 1xPhospho [S458]; P02545-4 1xPhospho [S346]; P02545 1xPhospho [S458]; P02545-3 1xPhospho [S458]	[R].NKSNEDQSMGNWQIKR.[Q]	1xPhospho [S3]; 1xOxidation [M9]	Used	2	2030.87	98.2	67.5	94.7	65.7	202.4	176.6		52.3	142.4		Peak Found	Peak Found	Peak Found	Peak Found	High	Peak Found	Not Found	Peak Found	Peak Found
P02545	R.NKSNEDQSMGNWQIKR.Q	[456-471]	P02545-5 1xPhospho [S359]; P02545-6 1xPhospho [S458]; P02545-2 1xPhospho [S458]; P02545-4 1xPhospho [S346]; P02545 1xPhospho [S458]; P02545-3 1xPhospho [S458]	[R].NKSNEDQSMGNWQIKR.[Q]	1xPhospho [S3]	Used	2	2014.88	92.2		102.3	99.8	240	174.7			190.9		Peak Found	Not Found	Peak Found	Peak Found	High	Peak Found	Not Found	Not Found	Peak Found
P02545	R.SGAQASSTPLSPTR.I	[12-25]	P02545-6 1xPhospho [S22]; P02545-2 1xPhospho [S22]; P02545 1xPhospho [S22]; P02545-3 1xPhospho [S22]	[R].SGAQASSTPLSPTR.[I]	1xPhospho [S11]	Used	0	1439.65	69	119.5	76.9	136.6	87.7	103.1	91.1	137.1	79.1		High	High	High	High	High	High	High	High	High
P02545	R.GRASSHSSQTQGGGSVTK.K	[400-417]	P02545-5 1xPhospho [S]; P02545-6 1xPhospho [S]; P02545-2 1xPhospho [S]; P02545-4 1xPhospho [S]; P02545 1xPhospho [S]; P02545-3 1xPhospho [S]	[R].GRASSHSSQTQGGGSVTK.[K]	1xPhospho [S]	Used	1	1811.8		146.2		262.2	253.3	238.4					Not Found	High	Not Found	High	High	High	Not Found	Not Found	Not Found
P02545	R.SVGGSGGGSFGDNLVTR.S	[628-644]	P02545-5 1xPhospho [S]; P02545-4 1xPhospho [S]; P02545 1xPhospho [S]; P02545-3 1xPhospho [S]	[R].SVGGSGGGSFGDNLVTR.[S]	1xPhospho [S]	Used	0	1646.72	145.6	108.3	83.8	147.7	149.8	141.7	39	45.7	38.3		High	High	Peak Found	High	High	High	High	High	Peak Found
P02545	R.SYLLGNSSPR.T	[645-654]	P02545-5 1xPhospho [S]; P02545-4 1xPhospho [S]; P02545 1xPhospho [S]; P02545-3 1xPhospho [S]	[R].SYLLGNSSPR.[T]	1xPhospho [S]	Used	0	1173.53	54.9	81.4	51.4	126.1	185.8	227.5	63.9	55.4	53.6		High	High	High	High	High	High	Peak Found	High	High
P02545	R.LSPSPTSQR.S	[389-397]	P02545-5 1xPhospho [S]; P02545-6 1xPhospho [S]; P02545-2 1xPhospho [S]; P02545-4 1xPhospho [S]; P02545 1xPhospho [S]; P02545-3 1xPhospho [S]	[R].LSPSPTSQR.[S]	1xPhospho [S]	Used	0	1052.48	73.9	100.9	85.4	142.2	150.9	169.3	55.5	69.4	52.5		High	High	High	High	High	High	High	High	High
P02662	K.DIGSESTEDQAMEDIK.Q	[43-58]	sp 1xPhospho [S61]; P02662 1xPhospho [S46]	[K].DIGSESTEDQAMEDIK.[Q]	1xPhospho [S4]	Used	0	1847.73									900		Not Found	Not Found	Not Found	Not Found	Not Found	Not Found	Not Found	Not Found	High
P02662	K.YKVPQLEIVPNSAEER.L	[104-119]	sp 1xPhospho [S130]; P02662 1xPhospho [S115]	[K].YKVPQLEIVPNSAEER.[L]	1xPhospho [S12]	Used	1	1951.95	103.3	5	3.2	11.8	10.1	2.3	4.5	45.1	714.9		High	Peak Found	Peak Found	Peak Found	High	Peak Found	Peak Found	Peak Found	High
P02662	K.VPQLEIVPNSAEER.L	[106-119]	sp 1xPhospho [S130]; P02662 1xPhospho [S115]	[K].VPQLEIVPNSAEER.[L]	1xPhospho [S10]	Used	0	1660.79	163.5		7.2	15.3	20.2	17.6	13.4	67.3	595.6		High	Not Found	Peak Found	Peak Found	Peak Found	Peak Found	Peak Found	Peak Found	High
P02663	R.EQLSTSEENSKK.T	[126-137]	sp 2xPhospho [S144; S146]; P02663 2xPhospho [S129; S131]	[R].EQLSTSEENSKK.[T]	2xPhospho [S4; S6]	Used	1	1539.6	12.2			18.1	30.4	22.8		120.4	696.1		Peak Found	Not Found	Not Found	Peak Found	Peak Found	Peak Found	Not Found	Peak Found	High
P02663	K.TVDMESTEVFTK.K	[138-149]	sp 1xPhospho [T159]; P02663 1xPhospho [T144]	[K].TVDMESTEVFTK.[K]	1xPhospho [T7]	Used	0	1466.61									900		Not Found	Not Found	Not Found	Not Found	Not Found	Not Found	Not Found	Not Found	High
P02663	K.TVDMESTEVFTK.K	[138-149]	sp 1xPhospho [S158]; P02663 1xPhospho [S143]	[K].TVDMESTEVFTK.[K]	1xPhospho [S6]; 1xOxidation [M4]	Used	0	1482.61								61	839		Not Found	Not Found	Not Found	Not Found	Not Found	Not Found	Not Found	Peak Found	High
P02663	R.EQLSTSEENSKK.T	[126-137]	sp 1xPhospho [S/T]; P02663 1xPhospho [S/T]	[R].EQLSTSEENSKK.[T]	1xPhospho [S/T]	Used	1	1459.63	202.2	3		8.9	4.8	2.4	2.2	13	663.6		Peak Found	Peak Found	Not Found	Peak Found	Peak Found	Peak Found	Peak Found	Peak Found	High
P02663	K.NMAINPSKENLCSTFCK.E	[25-41]	sp 1xPhospho [S46]; P02663 1xPhospho [S31]	[K].NMAINPSKENLCSTFCK.[E]	2xCarbamidomethyl [C12; C16]; 1xPhospho [S7]	Used	1	2093.89	319.6				24				556.4		Peak Found	Not Found	Not Found	Not Found	Peak Found	Not Found	Not Found	Not Found	High
P02666	K.IEKFQSEEQQQTEDELQDK.I	[30-48]	P02666 1xPhospho [S35]; sp 1xPhospho [S50]	[K].IEKFQSEEQQQTEDELQDK.[I]	1xPhospho [S6]	Used	1	2432.05						98.7			801.3		Not Found	Not Found	Not Found	Not Found	Not Found	Peak Found	Not Found	Not Found	High
P02666	K.FQSEEQQQTEDELQDK.I	[33-48]	P02666 1xPhospho [S35]; sp 1xPhospho [S50]	[K].FQSEEQQQTEDELQDK.[I]	1xPhospho [S3]	Used	0	2061.83	230.8	4.7		20.3	11.9	3.1		68	561.1		High	Peak Found	Not Found	Peak Found	Peak Found	Peak Found	Not Found	Peak Found	High
P04003	K.LSLEIEQLELQR.D	[574-585]	P04003 1xPhospho [S575]	[K].LSLEIEQLELQR.[D]	1xDeamidated [Q11]; 1xPhospho [S2]	Used	0	1551.77		305.7	409.7			86.6	98.1				Not Found	Peak Found	High	Not Found	Not Found	Peak Found	Peak Found	Not Found	Not Found
P04049	R.STSTPNVHMVSTTLPVDSR.M	[257-275]	P04049 1xPhospho [T/S]; P04049-2 1xPhospho [T/S]	[R].STSTPNVHMVSTTLPVDSR.[M]	1xPhospho [T/S]	Used	0	2108.97	107.2	229.7	100.9	99	22.2	54.2	39.3	126.1	121.5		High	High	High	High	High	Peak Found	High	High	High
P04049	R.RASDDGKLTDPSK.T	[41-53]	P04049 1xPhospho [S43]; P04049-2 1xPhospho [S43]	[R].RASDDGKLTDPSK.[T]	1xPhospho [S3]	Used	2	1469.66	214.7	170.1	158.9	35.8	32	29.2	67.3	92.2	99.7		High	High	High	Peak Found	Peak Found	Peak Found	Peak Found	High	High
P04049	R.SHSESASPSALSSSPNNLSPTGWSQPK.T	[283-309]	P04049 1xPhospho [S]; P04049-2 1xPhospho [S]	[R].SHSESASPSALSSSPNNLSPTGWSQPK.[T]	1xPhospho [S]	Used	0	2820.25	135.4	186.4	69.5	53.9	55.5	57.3	77.1	139	125.8		Peak Found	High	Peak Found	Peak Found	Peak Found	Peak Found	Peak Found	High	High
P04049	R.STSTPNVHMVSTTLPVDSR.M	[257-275]	P04049 1xPhospho [S/T]; P04049-2 1xPhospho [S/T]	[R].STSTPNVHMVSTTLPVDSR.[M]	1xPhospho [S/T]; 1xOxidation [M9]	Used	0	2124.96	98.6	194.5	134.6	53.4	58.5	93.5		91.4	175.4		Peak Found	High	High	Peak Found	Peak Found	Peak Found	Not Found	Peak Found	High
P04049	R.AAHTEDINACTLTTSPR.L	[628-644]	P04049 1xPhospho [T638]; P04049-2 1xPhospho [T658]	[R].AAHTEDINACTLTTSPR.[L]	1xCarbamidomethyl [C10]; 1xPhospho [T11]	Used	0	1937.84	251.8	152.8	199.4		51	44.1	46.2	66.9	87.7		High	High	Peak Found	Not Found	Peak Found	Peak Found	Peak Found	Peak Found	Peak Found
P04049; P10398-1	R.SASEPSLHR.A	[619-627]	P04049 1xPhospho [S621]; P04049-2 1xPhospho [S641]; P10398-1 1xPhospho [S582]	[R].SASEPSLHR.[AT]	1xPhospho [S3]	Not Used	0	1063.46	94.8	89.4	70.9	102.3	97.8	105	86.6	129	124	Shared	High	High	High	Peak Found	High	High	Peak Found	High	High
P04049; P10398-1	R.SASEPSLHR.T	[580-588]	P04049 1xPhospho [S621]; P04049-2 1xPhospho [S641]; P10398-1 1xPhospho [S582]	[R].SASEPSLHR.[AT]	1xPhospho [S3]	Not Used	0	1063.46	94.8	89.4	70.9	102.3	97.8	105	86.6	129	124	Shared	High	High	High	Peak Found	High	High	Peak Found	High	High
P04075	R.LQSIGTENTEENR.R	[44-56]	P04075 1xPhospho [S46]; P04075-2 1xPhospho [S100]; sp 1xPhospho [S46]	[R].LQSIGTENTEENR.[R]	1xPhospho [S3]	Used	0	1570.67	181.8	151.8	131.6	134.8	103.5	107.5	29.9	28.6	30.4		High	High	Peak Found	Peak Found	High	High	Peak Found	Peak Found	Peak Found
P04075	R.LQSIGTENTEENRR.F	[44-57]	P04075 1xPhospho [S46]; P04075-2 1xPhospho [S100]; sp 1xPhospho [S46]	[R].LQSIGTENTEENRR.[F]	1xPhospho [S3]	Used	1	1726.78	151.2	150.6	204.6	121.2	128.3	144.2					High	Peak Found	Peak Found	Peak Found	High	High	Not Found	Not Found	Not Found
P04075	K.GILAADESTGSIAKR.L	[29-43]	P04075 1xPhospho [S39]; P04075-2 1xPhospho [S93]; sp 1xPhospho [S39]	[K].GILAADESTGSIAKR.[L]	1xPhospho [S11]	Used	1	1568.77	108.7	94	104.4	128.7	145.4	141.8	53.7	59.5	63.9		High	Peak Found	High	High	High	Peak Found	Peak Found	Peak Found	Peak Found
P04075	K.GILAADESTGSIAK.R	[29-42]	P04075 1xPhospho [S]; P04075-2 1xPhospho [S]; sp 1xPhospho [S]	[K].GILAADESTGSIAK.[R]	1xPhospho [S/T]	Used	0	1412.67	84.2	118.5	94.6	168.5	134	130.6	61.9	64.2	43.5		Peak Found	High	High	Peak Found	High	High	Peak Found	Peak Found	Peak Found
P04075	R.LQSIGTENTEENR.R	[44-56]	P04075 1xPhospho [S46]; P04075-2 1xPhospho [S100]; sp 1xPhospho [S46]	[R].LQSIGTENTEENR.[R]	1xDeamidated [Q2]; 1xPhospho [S3]	Used	0	1571.66		138.1	80.9		93.6	103.7	192.5	147.1	144.2		Not Found	Peak Found	Peak Found	Not Found	High	Peak Found	Peak Found	Peak Found	Peak Found
P04183	-.MSCINLPTVLPGSPSKTR.G	[1-18]	P04183 1xPhospho [S13]; 1xMet-loss+Acetyl [N-Term]	[-].MSCINLPTVLPGSPSKTR.[G]	1xCarbamidomethyl [C3]; 1xPhospho [S13]; 1xMet-loss+Acetyl [N-Term]	Used	1	1948.96	26.6	148.4	148.2	74.8	85.5	105.9	162.8	70.6	77.2		High	Peak Found	High	Peak Found	High	Peak Found	Peak Found	High	High
P04183	-.MSCINLPTVLPGSPSK.T	[1-16]	P04183 1xPhospho [S]; 1xMet-loss+Acetyl [N-Term]	[-].MSCINLPTVLPGSPSK.[T]	1xCarbamidomethyl [C3]; 1xPhospho [S]; 1xMet-loss+Acetyl [N-Term]	Used	0	1691.81	89.7	130.1	100.8	124.4	106.4	107.5	92.8	84.3	64		High	High	High	High	High	High	High	High	High
P04183	R.KLFAPQQILQCSPAN.-	[220-234]	P04183 1xPhospho [S231]	[R].KLFAPQQILQCSPAN.[-]	1xCarbamidomethyl [C11]; 1xPhospho [S12]	Used	1	1794.86	58.4	131.7	119.9	115.5	114.9	112.7	79.7	102.1	64.8		Peak Found	Peak Found	Peak Found	High	High	Peak Found	Peak Found	Peak Found	Peak Found
P04626-1	R.SGGGDLTLGLEPSEEEAPR.S	[1054-1072]	P04626-2 1xPhospho [S/T]; P04626-1 1xPhospho [S/T]; P04626-5 1xPhospho [S/T]; P04626-4 1xPhospho [S/T]; P04626-3 1xPhospho [S/T]	[R].SGGGDLTLGLEPSEEEAPR.[S]	1xPhospho [S/T]	Used	0	1993.88		24.8	21.1	329.3	229	264.9	31				Not Found	Peak Found	Peak Found	Peak Found	High	High	Peak Found	Not Found	Not Found
P04637	R.ALPNNTSSSPQPK.K	[307-319]	P04637-8 1xPhospho [S]; P04637-6 1xPhospho [S]; P04637-7 1xPhospho [S]; P04637-4 1xPhospho [S]; P04637-9 1xPhospho [S]; P04637 1xPhospho [S]; P04637-3 1xPhospho [S]; P04637-5 1xPhospho [S]; P04637-2 1xPhospho [S]	[R].ALPNNTSSSPQPK.[K]	1xPhospho [T/S]	Used	0	1420.65		5.2	3.2	258.6	297.8	335.2					Not Found	Peak Found	High	High	High	High	Not Found	Not Found	Not Found
P04637	K.RALPNNTSSSPQPK.K	[306-319]	P04637-8 1xPhospho [S]; P04637-6 1xPhospho [S]; P04637-7 1xPhospho [S]; P04637-4 1xPhospho [S]; P04637-9 1xPhospho [S]; P04637 1xPhospho [S]; P04637-3 1xPhospho [S]; P04637-5 1xPhospho [S]; P04637-2 1xPhospho [S]	[K].RALPNNTSSSPQPK.[K]	1xPhospho [S]	Used	1	1576.75				233.7	331.6	334.7					Not Found	Not Found	Not Found	Peak Found	High	High	Not Found	Not Found	Not Found
P04637	R.ALPNNTSSSPQPK.K	[307-319]	P04637-8 1xPhospho [S/T]; P04637-6 1xPhospho [S/T]; P04637-7 1xPhospho [S/T]; P04637-4 1xPhospho [S/T]; P04637-9 1xPhospho [S/T]; P04637 1xPhospho [S/T]; P04637-3 1xPhospho [S/T]; P04637-5 1xPhospho [S/T]; P04637-2 1xPhospho [S/T]	[R].ALPNNTSSSPQPK.[K]	1xDeamidated [N]; 1xPhospho [S/T]	Used	0	1421.63				271.1	287.7	341.2					Not Found	Not Found	Not Found	High	High	High	Not Found	Not Found	Not Found
P04792	R.GPSWDPFRDWYPHSR.L	[13-27]	P04792 1xPhospho [S15]	[R].GPSWDPFRDWYPHSR.[L]	1xPhospho [S3]	Used	1	1982.83	150.5	314.3	138.4	22.6	12.2	9.2	185.5	36.8	30.4		Peak Found	High	Peak Found	Peak Found	Peak Found	Peak Found	High	Peak Found	Peak Found
P04792	R.GPSWDPFR.D	[13-20]	P04792 1xPhospho [S15]	[R].GPSWDPFR.[D]	1xPhospho [S3]	Used	0	1041.42	318.4	314.7	99.9	25.3	11.6	11.5	32.9	56.3	29.4		High	High	High	High	Peak Found	Peak Found	High	High	High
P04792	R.AQLGGPEAAKSDETAAK.-	[189-205]	P04792 1xPhospho [S199]	[R].AQLGGPEAAKSDETAAK.[-]	1xPhospho [S11]	Used	1	1723.79	139.6	192.3	234.8	18.2	11.2	69.9	83.2	129.9	20.9		Peak Found	High	Peak Found	Peak Found	Peak Found	Peak Found	Peak Found	Peak Found	Peak Found
P04792	R.QLSSGVSEIR.H	[80-89]	P04792 1xPhospho [S]	[R].QLSSGVSEIR.[H]	1xPhospho [S]	Used	0	1155.54	215.7	292	167.3	28.7	19.9	24.7	42.4	61.4	47.9		High	High	High	High	High	High	High	High	High
P04792	R.QLSSGVSEIR.H	[80-89]	P04792 1xPhospho [S82]	[R].QLSSGVSEIR.[H]	1xDeamidated [Q1]; 1xPhospho [S3]	Used	0	1156.52	141.5	399.8	247.1					63.4	48.2		Peak Found	High	High	Not Found	Not Found	Not Found	Not Found	Peak Found	Peak Found
P04920-1	R.TSPSSPAPLPHQEATPR.A	[169-185]	P04920-3 1xPhospho [S]; P04920-2 1xPhospho [S]; P04920-1 1xPhospho [S]	[R].TSPSSPAPLPHQEATPR.[A]	1xPhospho [S/T]	Used	0	1852.86	34.5	32		346.9	160.4	188.2	35.2	55.8	47.1		Peak Found	Peak Found	Not Found	High	Peak Found	High	Peak Found	Peak Found	Peak Found
P05114	R.KVSSAEGAAKEEPK.R	[5-18]	P05114 1xPhospho [S]	[R].KVSSAEGAAKEEPK.[R]	1xPhospho [S]	Used	2	1510.71	185.2	134.7	158.4	67.1	48.1	39.6	34.4	106.3	126.2		High	High	High	Peak Found	Peak Found	Peak Found	Peak Found	High	High
P05387	K.KEESEESDDDMGFGLFD.-	[99-115]	P05386 1xPhospho [S]; P05386-2 1xPhospho [S]; P05387 1xPhospho [S]	[K].KEESEESDDDMGFGLFD.[-]	1xPhospho [S]; 1xOxidation [M11]	Used	1	2045.72	94.2	163.9	120.1	70.3	65.9	60.1	194.1	53.1	78.2		High	High	High	High	High	Peak Found	High	High	High
P05387	K.LASVPAGGAVAVSAAPGSAAPAAGSAPAAAEEK.K	[62-94]	P05387 1xPhospho [S]	[K].LASVPAGGAVAVSAAPGSAAPAAGSAPAAAEEK.[K]	1xPhospho [S]	Used	0	2854.4	72.3	176.5	126.5	81.2	33.8	77.8	137.1	101.1	93.8		High	High	High	High	High	High	High	High	High
P05387	K.KEESEESDDDMGFGLFD.-	[99-115]	P05386 1xPhospho [S]; P05386-2 1xPhospho [S]; P05387 1xPhospho [S]	[K].KEESEESDDDMGFGLFD.[-]	1xPhospho [S]	Used	1	2029.73	44.7	290	152.1	118.5	63.3	26.2	156.2	24.9	24.1		High	High	High	Peak Found	Peak Found	Peak Found	High	Peak Found	Peak Found
P05387	R.YVASYLLAALGGNSSPSAK.D	[3-21]	P05387 1xPhospho [S]	[R].YVASYLLAALGGNSSPSAK.[D]	1xPhospho [S/Y]	Used	0	1948.94	57.6	114	131.1	67.8	58.5	74.6	208.3	100.9	87.2		High	High	High	Peak Found	Peak Found	Peak Found	High	High	High
P05412	K.NSDLLTSPDVGLLK.L	[57-70]	P05412 1xPhospho [T/S]	[K].NSDLLTSPDVGLLK.[L]	1xPhospho [T/S]	Used	0	1551.77	26.4	26.3	11.8	89.2	49	54.3	209	247.5	186.4		Peak Found	Peak Found	Peak Found	High	High	Peak Found	High	High	High
P05412	K.LASPELER.L	[71-78]	P05412 1xPhospho [S73]; P17535 1xPhospho [S100]	[K].LASPELER.[L]	1xPhospho [S3]	Used	0	994.461		44.6	34.2	75	44.8	59.6	184.6	242.7	214.5		Not Found	High	High	High	High	High	High	High	High
P05455	K.FASDDEHDEHDENGATGPVKR.A	[364-384]	P05455 1xPhospho [S366]	[K].FASDDEHDEHDENGATGPVKR.[A]	1xPhospho [S3]	Used	1	2405.96	89.1	68.1	105.7	202.6	47.5	14.2	53.5	160	159.3		High	High	High	High	High	Peak Found	High	High	High
P05455	K.FASDDEHDEHDENGATGPVK.R	[364-383]	P05455 1xPhospho [S366]	[K].FASDDEHDEHDENGATGPVK.[R]	1xPhospho [S3]	Used	0	2249.86	99.6	66.5	66.1	112.8	125.4	70.6	113.5	109	136.5		High	High	High	High	High	High	High	High	High
P05455	R.SPSKPLPEVTDEYKNDVK.N	[92-109]	P05455 1xPhospho [S]	[R].SPSKPLPEVTDEYKNDVK.[N]	1xPhospho [S]	Used	1	2126.01	74.1	59.8	83.6	52.8	75.8	55.9	129	168.8	200.1		High	Peak Found	High	Peak Found	High	Peak Found	Peak Found	High	High
P05455	K.TKFASDDEHDEHDENGATGPVK.R	[362-383]	P05455 1xPhospho [S/T]	[K].TKFASDDEHDEHDENGATGPVK.[R]	1xPhospho [S/T]	Used	1	2479	69.9	64	83.1	72.1	130.1	66.9	108.6	117.5	187.8		High	High	High	High	High	High	High	High	High
P05455	K.TKFASDDEHDEHDENGATGPVK.R	[362-383]	P05455 1xPhospho [S/T]	[K].TKFASDDEHDEHDENGATGPVK.[R]	1xDeamidated [N15]; 1xPhospho [S/T]	Used	1	2479.99	134.4	63.7	45.9	91.2	107.2	96.1	101.1	91	169.4		High	High	High	High	High	High	High	High	High
P05455	K.FASDDEHDEHDENGATGPVKR.A	[364-384]	P05455 1xPhospho [S366]	[K].FASDDEHDEHDENGATGPVKR.[A]	1xDeamidated [N13]; 1xPhospho [S3]	Used	1	2406.95	205.4	83.6	107.2	191.8	51.6	10.6	28.3	56.6	164.9		High	High	High	High	High	Peak Found	Peak Found	High	High
P05455	K.FASDDEHDEHDENGATGPVK.R	[364-383]	P05455 1xPhospho [S366]	[K].FASDDEHDEHDENGATGPVK.[R]	1xDeamidated [N13]; 1xPhospho [S3]	Used	0	2250.85	81.7	62.4	61.4	118.1	133.2	88.7	107.9	120.6	125.9		High	High	High	High	High	High	High	High	High
P05534	R.KGGSYSQAASSDSAQGSDVSLTACKV.-	[340-365]	P05534 1xPhospho [S349]; P01892 1xPhospho [S349]; P01891 1xPhospho [S349]; P30447 1xPhospho [S349]; Q09160 1xPhospho [S349]; P10316 1xPhospho [S349]	[R].KGGSYSQAASSDSAQGSDVSLTACKV.[-]	1xCarbamidomethyl [C24]; 1xPhospho [S10]	Used	2	2641.14		35.8	24.9	129.6	185.6	118.8	158.4	101.4	145.6		Not Found	Peak Found	Peak Found	High	High	Peak Found	Peak Found	Peak Found	Peak Found
P05783	R.STSFRGGMGSGGLATGIAGGLAGMGGIQNEK.E	[51-81]	P05783 1xPhospho [T/S]	[R].STSFRGGMGSGGLATGIAGGLAGMGGIQNEK.[E]	1xPhospho [T/S]; 2xOxidation [M8; M24]	Used	1	2951.34		48.4	38.3	33.2	97.9	211.5	12.7	301.8	156.2		Not Found	Peak Found	Peak Found	Peak Found	Peak Found	High	Peak Found	High	Peak Found
P05783	R.STSFRGGMGSGGLATGIAGGLAGMGGIQNEK.E	[51-81]	P05783 1xPhospho [T/S]	[R].STSFRGGMGSGGLATGIAGGLAGMGGIQNEK.[E]	1xPhospho [T/S]; 1xOxidation [M]	Used	1	2935.34	28.1	123.1	93	134.8	198.9	122.1	63.2	68	68.7		High	Peak Found	Peak Found	High	High	High	Peak Found	High	High
P05783	R.STFSTNYR.S	[7-14]	P05783 1xPhospho [T/S]	[R].STFSTNYR.[S]	1xPhospho [T/S]	Used	0	1055.42	25.7	40.5	39.5	299.5	174.5	188	47.3	39.8	45.3		Peak Found	Peak Found	High	Peak Found	High	High	Peak Found	Peak Found	Peak Found
P05783	R.VRSLETENR.R	[98-106]	P05783 1xPhospho [S100]	[R].VRSLETENR.[R]	1xPhospho [S3]	Used	1	1183.55	29.6	45.8	39	210.1	194.7	158.9	51.7	79.8	90.5		Peak Found	Peak Found	Peak Found	High	High	High	Peak Found	Peak Found	Peak Found
P05783	R.STSFRGGMGSGGLATGIAGGLAGMGGIQNEKETMQSLNDR.L	[51-90]	P05783 1xPhospho [S53]	[R].STSFRGGMGSGGLATGIAGGLAGMGGIQNEKETMQSLNDR.[L]	1xPhospho [S3]	Used	2	3993.83			67	378.4	96.4	63.2	39.7	90.8	164.6		Not Found	Not Found	Peak Found	High	Peak Found	Peak Found	Peak Found	Peak Found	Peak Found
P05783	R.SLGSVQAPSYGARPVSSAASVYAGAGGSGSR.I	[15-45]	P05783 1xPhospho [S42]	[R].SLGSVQAPSYGARPVSSAASVYAGAGGSGSR.[I]	1xPhospho [S28]	Used	0	2934.37				292	608						Not Found	Not Found	Not Found	Peak Found	High	Not Found	Not Found	Not Found	Not Found
P05783	R.STSFRGGMGSGGLATGIAGGLAGMGGIQNEK.E	[51-81]	P05783 1xPhospho [S/T]	[R].STSFRGGMGSGGLATGIAGGLAGMGGIQNEK.[E]	1xPhospho [S/T]	Used	1	2919.35	16	64.9	65.9	260.1	145.1	110.5	140.5	46.8	50.2		High	High	High	High	High	High	High	High	High
P05787 P05787	R.AFSSRSYTSGPGSR.I	[19-32]	P05787-2 1xPhospho [Y53]; P05787 P05787 1xPhospho [Y25]	[R].AFSSRSYTSGPGSR.[I]	1xPhospho [Y7]	Used	1	1539.66	43.2	43.6	76	200.7	188.8	179.2	40.1	56.3	72		Peak Found	Peak Found	Peak Found	Peak Found	High	Peak Found	Peak Found	Peak Found	Peak Found
P05787 P05787	R.SYTSGPGSR.I	[24-32]	P05787-2 1xPhospho [Y/T/S]; P05787 P05787 1xPhospho [Y/T/S]	[R].SYTSGPGSR.[I]	1xPhospho [Y/T/S]	Used	0	991.388	42	61.9	63.6	222.6	165.3	186.6	34.4	59.9	63.6		High	High	High	High	High	High	High	High	High
P05787 P05787	R.VGSSNFR.G	[41-47]	P05787-2 1xPhospho [S71]; P05787 P05787 1xPhospho [S43]	[R].VGSSNFR.[G]	1xPhospho [S3]	Used	0	846.351		36.8	40.8	203.7	170.5	245.7	56.3	77.9	68.3		Not Found	High	Peak Found	High	High	Peak Found	Peak Found	High	Peak Found
P05787 P05787	K.TTSGYAGGLSSAYGGLTSPGLSYSLGSSFGSGAGSSSFSR.T	[415-454]	P05787-2 1xPhospho [S452]; P05787 P05787 1xPhospho [S424]	[K].TTSGYAGGLSSAYGGLTSPGLSYSLGSSFGSGAGSSSFSR.[T]	1xPhospho [S10]	Used	0	3805.69		192.2	220.7				487.2				Not Found	Peak Found	Peak Found	Not Found	Not Found	Not Found	High	Not Found	Not Found
P05787 P05787	R.SLDMDSIIAEVK.A	[253-264]	P05787-2 1xPhospho [S281]; H-INV:HIT000292931 1xPhospho [S213]; P05787 P05787 1xPhospho [S253]	[R].SLDMDSIIAEVK.[A]	1xPhospho [S1]	Used	0	1400.64		308.9	203		234.4		153.7				Not Found	High	Peak Found	Not Found	Peak Found	Not Found	Peak Found	Not Found	Not Found
P05787 P05787	R.ISSSSFSR.V	[33-40]	P05787-2 1xPhospho [S]; P05787 P05787 1xPhospho [S]	[R].ISSSSFSR.[V]	1xPhospho [S]	Used	0	950.398	27.8	68	47	243.8	148.9	189.3	40.9	71.9	62.5		Peak Found	High	Peak Found	High	High	High	High	High	High
P05787 P05787	K.LVSESSDVLPK.-	[473-483]	P05787-2 1xPhospho [S]; P05787 P05787 1xPhospho [S]	[K].LVSESSDVLPK.[-]	1xPhospho [S]	Used	0	1253.6	71.3	64	41	170.5	131.3	155.7	44.7	108.3	113.3		Peak Found	Peak Found	Peak Found	High	High	Peak Found	Peak Found	Peak Found	High
P05787 P05787	K.SYKVSTSGPR.A	[9-18]	P05787-2 1xPhospho [S/T]; P05787 P05787 1xPhospho [S/T]	[K].SYKVSTSGPR.[A]	1xPhospho [S/T]	Used	1	1161.53	56.5	73.2	62	161.5	120.3	116.1	64.7	102.4	143.3		Peak Found	High	Peak Found	High	Peak Found	Peak Found	Peak Found	Peak Found	High
P06239-1	R.NLDNGGFYISPR.I	[185-196]	P06239-3 1xPhospho [Y/S]; P06239-1 1xPhospho [Y/S]; P06239-2 1xPhospho [Y/S]	[R].NLDNGGFYISPR.[I]	1xPhospho [Y/S]	Used	0	1432.63							239.4	343.1	317.6		Not Found	Not Found	Not Found	Not Found	Not Found	Not Found	High	High	High
P06239-1; P12931	R.LIEDNEYTAR.E	[388-397]	P06239-3 1xPhospho [Y424]; P06241-2 1xPhospho [Y417]; P06239-1 1xPhospho [Y394]; P12931-2 1xPhospho [Y425]; P07947 1xPhospho [Y426]; P06241-1 1xPhospho [Y420]; P12931 1xPhospho [Y419]; P06241-3 1xPhospho [Y365]	[R].LIEDNEYTAR.[EQ]	1xPhospho [Y7]	Not Used	0	1303.56	96.9	116	104.3	32.5	34.2	52.2	131.9	188.7	143.2	Shared	High	High	High	High	High	High	High	High	High
P06239-1; P12931	R.LIEDNEYTAR.Q	[413-422]	P06239-3 1xPhospho [Y424]; P06241-2 1xPhospho [Y417]; P06239-1 1xPhospho [Y394]; P12931-2 1xPhospho [Y425]; P07947 1xPhospho [Y426]; P06241-1 1xPhospho [Y420]; P12931 1xPhospho [Y419]; P06241-3 1xPhospho [Y365]	[R].LIEDNEYTAR.[EQ]	1xPhospho [Y7]	Not Used	0	1303.56	96.9	116	104.3	32.5	34.2	52.2	131.9	188.7	143.2	Shared	High	High	High	High	High	High	High	High	High
P06400	R.SPYKFPSSPLR.I	[788-798]	P06400 2xPhospho [Y790; S795]	[R].SPYKFPSSPLR.[I]	2xPhospho [Y3; S8]	Used	1	1438.62	81.3	94.4	42.5	125.9	127.1	75.6	102.5	144.9	105.8		Peak Found	Peak Found	Peak Found	High	Peak Found	Peak Found	Peak Found	Peak Found	Peak Found
P06400	K.ISEGLPTPTKMTPR.S	[815-828]	P06400 2xPhospho [T821; T823]	[K].ISEGLPTPTKMTPR.[S]	2xPhospho [T7; T9]; 1xOxidation [M11]	Used	1	1703.75	24.7	129.1	59.6	94.9	122.4	95	127.3	116.3	130.6		Peak Found	High	Peak Found	Peak Found	Peak Found	Peak Found	Peak Found	Peak Found	Peak Found
P06400	R.IPGGNIYISPLKSPYK.I	[799-814]	P06400 2xPhospho [S811; S/Y]	[R].IPGGNIYISPLKSPYK.[I]	2xPhospho [S/Y]	Used	1	1906.91		109.6	73.7	134.3	104.1	78.6	159.5	137.4	102.9		Not Found	Peak Found	Peak Found	High	High	Peak Found	High	High	High
P06400	K.ISEGLPTPTK.M	[815-824]	P06400 1xPhospho [T821]	[K].ISEGLPTPTK.[M]	1xPhospho [T7]	Used	0	1122.54	100.3	65.8	53.4	91.2	95.5	104.8	134.8	147.5	106.7		Peak Found	Peak Found	High	Peak Found	Peak Found	Peak Found	High	High	High
P06400	R.KSNLDEEVNVIPPHTPVR.T	[359-376]	P06400 1xPhospho [T373]	[R].KSNLDEEVNVIPPHTPVR.[T]	1xPhospho [T15]	Used	1	2124.05	66.9	110.6	66.6	84	120.7	106.6	79.6	130.9	134		High	High	High	High	High	Peak Found	High	High	High
P06400	K.SNLDEEVNVIPPHTPVR.T	[360-376]	P06400 1xPhospho [T373]	[K].SNLDEEVNVIPPHTPVR.[T]	1xPhospho [T14]	Used	0	1995.95		25.4	72.5	118.2	122.3	145.5	155	128.6	132.5		Not Found	Peak Found	Peak Found	High	Peak Found	Peak Found	High	High	Peak Found
P06400	K.ISEGLPTPTKMTPR.S	[815-828]	P06400 1xPhospho [T826]	[K].ISEGLPTPTKMTPR.[S]	1xPhospho [T12]	Used	1	1607.79			272.8	250.5	283.5	33.3	32.8	27.1			Not Found	Not Found	Peak Found	Peak Found	High	Peak Found	Peak Found	Peak Found	Not Found
P06400	K.TAVIPINGSPR.T	[241-251]	P06400 1xPhospho [S249]	[K].TAVIPINGSPR.[T]	1xPhospho [S9]	Used	0	1204.61	50.3	78.9	78.2	82.1	117.8	134.8	112.9	140.8	104.2		Peak Found	High	High	High	High	High	High	High	High
P06400	R.IPGGNIYISPLKSPYK.I	[799-814]	P06400 1xPhospho [S807]	[R].IPGGNIYISPLKSPYK.[I]	1xPhospho [S9]	Used	1	1826.95	85.6	90.6	86.7	88.6	93.5	105.3	130.5	124.9	94.3		Peak Found	High	Peak Found	Peak Found	Peak Found	Peak Found	Peak Found	High	High
P06400	K.TNILQYASTRPPTLSPIPHIPR.S	[766-787]	P06400 1xPhospho [S773]	[K].TNILQYASTRPPTLSPIPHIPR.[S]	1xPhospho [S8]	Used	0	2552.34							900				Not Found	Not Found	Not Found	Not Found	Not Found	Not Found	High	Not Found	Not Found
P06400	K.FPSSPLR.I	[792-798]	P06400 1xPhospho [S795]	[K].FPSSPLR.[I]	1xPhospho [S4]	Used	0	883.407	142.4	62.7	69.9	161.5	144.3	82.7	78.4	98.8	59.2		High	High	Peak Found	High	High	Peak Found	High	High	Peak Found
P06400	R.KTAATAAAAAAEPPAPPPPPPPEEDPEQDSGPEDLPLVR.L	[8-46]	P06400 1xPhospho [S37]	[R].KTAATAAAAAAEPPAPPPPPPPEEDPEQDSGPEDLPLVR.[L]	1xPhospho [S30]	Used	1	3976.89		242.5	295.3		89.8		252.3		20.1		Not Found	High	High	Not Found	Peak Found	Not Found	High	Not Found	Peak Found
P06400	K.TAATAAAAAAEPPAPPPPPPPEEDPEQDSGPEDLPLVR.L	[9-46]	P06400 1xPhospho [S37]	[K].TAATAAAAAAEPPAPPPPPPPEEDPEQDSGPEDLPLVR.[L]	1xPhospho [S29]	Used	0	3848.79	90.1	45.1		154.1	160	136.1		80.7	233.9		High	Peak Found	Not Found	Peak Found	Peak Found	Peak Found	Not Found	Peak Found	High
P06400	R.SPYKFPSSPLR.I	[788-798]	P06400 1xPhospho [S/Y]	[R].SPYKFPSSPLR.[I]	1xPhospho [S/Y]	Used	1	1358.65	54.5	98.5	70.7	114.1	116.6	114.7	113.4	116.8	100.7		High	High	High	High	High	Peak Found	High	High	High
P06400	K.TAVIPINGSPR.T	[241-251]	P06400 1xPhospho [S249]	[K].TAVIPINGSPR.[T]	1xDeamidated [N7]; 1xPhospho [S9]	Used	0	1205.59	50.6	88.3	88.9	111.1	105.8	117.1	124.4	121.9	92		High	Peak Found	Peak Found	Peak Found	High	High	Peak Found	High	Peak Found
P06400	R.KTAATAAAAAAEPPAPPPPPPPEEDPEQDSGPEDLPLVR.L	[8-46]	P06400 1xPhospho [S37]	[R].KTAATAAAAAAEPPAPPPPPPPEEDPEQDSGPEDLPLVR.[L]	1xDeamidated [Q28]; 1xPhospho [S30]	Used	1	3977.87					749.5				150.5		Not Found	Not Found	Not Found	Not Found	High	Not Found	Not Found	Not Found	Peak Found
P06400	K.TAATAAAAAAEPPAPPPPPPPEEDPEQDSGPEDLPLVR.L	[9-46]	P06400 1xPhospho [S37]	[K].TAATAAAAAAEPPAPPPPPPPEEDPEQDSGPEDLPLVR.[L]	1xDeamidated [Q27]; 1xPhospho [S29]	Used	0	3849.77		128.9	112.9	210.4	141.7	108.2	122.1	75.8			Not Found	Peak Found	High	Peak Found	Peak Found	Peak Found	Peak Found	Peak Found	Not Found
P06454-1	-.MSDAAVDTSSEITTK.D	[1-15]	P06454-2 1xPhospho [S/T]; 1xMet-loss+Acetyl [N-Term]; P06454-1 1xPhospho [S/T]; 1xMet-loss+Acetyl [N-Term]	[-].MSDAAVDTSSEITTK.[D]	1xPhospho [S/T]; 1xMet-loss+Acetyl [N-Term]	Used	0	1546.65	85.2	89.4	66.6	112.9	105.4	135.7	82.4	122.9	99.6		High	High	High	High	High	High	High	High	High
P06744	R.SNTPILVDGK.D	[107-116]	P06744 1xPhospho [T109]; P06744-2 1xPhospho [T148]	[R].SNTPILVDGK.[D]	1xPhospho [T3]	Used	0	1123.54	439.5	39.6	42	150.8	123.2		50.1	28.9	26		Peak Found	Peak Found	Peak Found	High	High	Not Found	Peak Found	Peak Found	Peak Found
P06748	R.TVSLGAGAKDELHIVEAEAMNYEGSPIKVTLATLK.M	[46-80]	P06748-2 1xPhospho [Y/S]; P06748-3 1xPhospho [Y/S]; P06748 1xPhospho [Y/S]	[R].TVSLGAGAKDELHIVEAEAMNYEGSPIKVTLATLK.[M]	1xPhospho [Y/S]; 1xOxidation [M20]	Used	2	3751.89		269.7	175.1	10.9	10.5	166.6	225.3		41.9		Not Found	High	High	Peak Found	Peak Found	Peak Found	High	Not Found	Peak Found
P06748	K.MQASIEKGGSLPK.V	[251-263]	P06748-2 1xPhospho [S225]; P06748 1xPhospho [S254]	[K].MQASIEKGGSLPK.[V]	1xPhospho [S4]; 1xOxidation [M1]	Used	1	1441.68	18.6	94.3	110	40.2	61.6	80.3	123	166	206		Peak Found	Peak Found	Peak Found	Peak Found	Peak Found	Peak Found	High	High	Peak Found
P06748	K.MQASIEKGGSLPK.V	[251-263]	P06748-2 1xPhospho [S225]; P06748 1xPhospho [S254]	[K].MQASIEKGGSLPK.[V]	1xPhospho [S4]	Used	1	1425.68	9.4	206.1	172.6	123.8	113.2	34	38	133.2	69.8		Peak Found	High	High	Peak Found	Peak Found	Peak Found	Peak Found	Peak Found	Peak Found
P06748	K.GPSSVEDIKAK.M	[240-250]	P06748-2 1xPhospho [S214]; P06748-3 1xPhospho [S243]; P06748 1xPhospho [S243]	[K].GPSSVEDIKAK.[M]	1xPhospho [S4]	Used	1	1210.57	67.3	123.3	133.1	65.7	92.8	125.6	86.8	105.6	99.8		Peak Found	Peak Found	Peak Found	High	Peak Found	Peak Found	Peak Found	Peak Found	Peak Found
P06748	K.GPSSVEDIK.A	[240-248]	P06748-2 1xPhospho [S214]; P06748-3 1xPhospho [S243]; P06748 1xPhospho [S243]	[K].GPSSVEDIK.[A]	1xPhospho [S4]	Used	0	1011.44	93.6	146.3	105.6	84.9	69.7	95.2	136.7	94.8	73.2		Peak Found	Peak Found	High	High	High	Peak Found	High	High	Peak Found
P06748	K.GGSLPKVEAK.F	[258-267]	P06748-2 1xPhospho [S231]; P06748 1xPhospho [S260]	[K].GGSLPKVEAK.[F]	1xPhospho [S3]	Used	1	1065.53	61.2	96.1	88.9	81.2	80	96.7	134.2	151	110.8		High	Peak Found	High	High	High	High	High	High	High
P06748	R.TVSLGAGAKDELHIVEAEAMNYEGSPIKVTLATLK.M	[46-80]	P06748-2 1xPhospho [S70]; P06748-3 1xPhospho [S70]; P06748 1xPhospho [S70]	[R].TVSLGAGAKDELHIVEAEAMNYEGSPIKVTLATLK.[M]	1xDeamidated [N21]; 1xPhospho [S25]	Used	2	3736.88			95				741.2		63.8		Not Found	Not Found	Peak Found	Not Found	Not Found	Not Found	High	Not Found	Peak Found
P06748	K.CGSGPVHISGQHLVAVEEDAESEDEEEEDVK.L	[104-134]	P06748-2 1xPhospho [S]; P06748-3 1xPhospho [S]; P06748 1xPhospho [S]	[K].CGSGPVHISGQHLVAVEEDAESEDEEEEDVK.[L]	1xCarbamidomethyl [C1]; 1xPhospho [S]	Used	0	3460.44	142.2	52.3	68.9	172.1	128	55	178.4	33.3	69.8		Peak Found	Peak Found	High	High	High	High	High	Peak Found	Peak Found
P06748	-.MEDSMDMDMSPLRPQNYLFGCELK.A	[1-24]	P06748-2 1xAcetyl [N-Term]; 1xPhospho [S10]; P06748-3 1xAcetyl [N-Term]; 1xPhospho [S10]; P06748 1xAcetyl [N-Term]; 1xPhospho [S10]	[-].MEDSMDMDMSPLRPQNYLFGCELK.[A]	1xAcetyl [N-Term]; 1xCarbamidomethyl [C21]; 1xPhospho [S10]; 2xOxidation [M7; M9]	Used	0	3061.22	54.3	153	115.8	86.1	23.5	58.2		225.5	183.7		Peak Found	Peak Found	Peak Found	Peak Found	Peak Found	Peak Found	Not Found	Peak Found	High
P06748	-.MEDSMDMDMSPLRPQNYLFGCELK.A	[1-24]	P06748-2 1xAcetyl [N-Term]; 1xPhospho [S]; P06748-3 1xAcetyl [N-Term]; 1xPhospho [S]; P06748 1xAcetyl [N-Term]; 1xPhospho [S]	[-].MEDSMDMDMSPLRPQNYLFGCELK.[A]	1xAcetyl [N-Term]; 1xCarbamidomethyl [C21]; 1xPhospho [S]; 1xOxidation [M]	Used	0	3045.22	20	290.7	198.9	59.7	51.7		100.7	80.2	98.1		Peak Found	High	High	Peak Found	Peak Found	Not Found	Peak Found	Peak Found	Peak Found
P07199	R.TPAAPASPAAVPSEGSGGSTTGWR.A	[150-173]	P07199 1xPhospho [S/T]	[R].TPAAPASPAAVPSEGSGGSTTGWR.[A]	1xPhospho [S/T]	Used	0	2292.03	58.7	70.9	15	138.3	139.8	168.9	44.3	179	85.1		High	High	Peak Found	High	High	High	Peak Found	High	High
P07305	K.GVGASGSFR.L	[86-94]	P07305 1xPhospho [S92]; P07305-2 1xPhospho [S75]	[K].GVGASGSFR.[L]	1xPhospho [S7]	Used	0	917.388	141.3	331.4	154.9	57.1	49.1	56.7	25.6	50.5	33.5		High	High	High	Peak Found	High	High	Peak Found	High	High
P07355	K.LSLEGDHSTPPSAYGSVK.A	[11-28]	A6NMY6 1xPhospho [S/Y/T]; P07355-2 1xPhospho [S/Y/T]; P07355 1xPhospho [S/Y/T]	[K].LSLEGDHSTPPSAYGSVK.[A]	1xPhospho [S/Y/T]	Used	0	1924.87	114.1	125.8	111.8	49.4	51.9	68.4	68.2	176.1	134.2		High	High	High	High	High	High	High	High	High
P07355	-.MSTVHEILCKLSLEGDHSTPPSAYGSVK.A	[1-28]	A6NMY6 1xPhospho [S12]; 1xMet-loss+Acetyl [N-Term]; P07355 1xPhospho [S12]; 1xMet-loss+Acetyl [N-Term]	[-].MSTVHEILCKLSLEGDHSTPPSAYGSVK.[A]	1xCarbamidomethyl [C9]; 1xPhospho [S12]; 1xMet-loss+Acetyl [N-Term]	Used	1	3034.42	222.2	183.8	74.4	164.3	95.8	132			27.6		High	Peak Found	Peak Found	Peak Found	Peak Found	Peak Found	Not Found	Not Found	Peak Found
P07814	K.TGKEYIPGQPPLSQSSDSSPTR.N	[868-889]	P07814 1xPhospho [S]	[K].TGKEYIPGQPPLSQSSDSSPTR.[N]	1xDeamidated [Q]; 1xPhospho [S]	Not Used	1	2413.09										No Quan Values	Not Found	High	Not Found	High	Not Found	Not Found	Not Found	Not Found	Not Found
P07814	K.EYIPGQPPLSQSSDSSPTR.N	[871-889]	P07814 1xPhospho [S885]	[K].EYIPGQPPLSQSSDSSPTR.[N]	1xDeamidated [Q6]; 1xPhospho [S15]	Not Used	0	2126.93										No Quan Values	Not Found	Not Found	Not Found	Not Found	High	Not Found	Not Found	Not Found	Not Found
P07814	K.EYIPGQPPLSQSSDSSPTR.N	[871-889]	P07814 2xPhospho [S]	[K].EYIPGQPPLSQSSDSSPTR.[N]	2xPhospho [S]	Used	0	2205.91		122.8	51.4	124.7	238.5	108.3	151	57.5	45.8		Not Found	Peak Found	Peak Found	High	High	Peak Found	Peak Found	Peak Found	Peak Found
P07814	K.TGKEYIPGQPPLSQSSDSSPTR.N	[868-889]	P07814 1xPhospho [S]	[K].TGKEYIPGQPPLSQSSDSSPTR.[N]	1xPhospho [S]	Used	1	2412.11	59.3	97.4	137.1	73.6	115.2	126.1	86.5	86.9	118		High	High	High	High	High	High	High	High	High
P07814	K.EYIPGQPPLSQSSDSSPTR.N	[871-889]	P07814 1xPhospho [S]	[K].EYIPGQPPLSQSSDSSPTR.[N]	1xPhospho [S/T]	Used	0	2125.94	89.4	117	96.9	113.8	99	108.7	102.5	90.2	82.4		High	High	High	High	High	High	High	High	High
P07814	K.EYIPGQPPLSQSSDSSPTRNSEPAGLETPEAK.V	[871-902]	P07814 1xPhospho [S/T]	[K].EYIPGQPPLSQSSDSSPTRNSEPAGLETPEAK.[V]	1xPhospho [S/T]	Used	1	3449.57	64.7	107.3	125.9	81.6	118.1	150.5	82.7	77.2	91.9		Peak Found	High	High	Peak Found	High	High	Peak Found	High	High
P07814	K.ERPTPSLNNNCTTSEDSLVLYNR.V	[734-756]	P07814 1xPhospho [S]	[K].ERPTPSLNNNCTTSEDSLVLYNR.[V]	1xCarbamidomethyl [C11]; 1xPhospho [S]	Used	0	2760.23	85.5	106.1	83.5	163.2	223.2	164		27.1	47.3		Peak Found	High	High	Peak Found	Peak Found	Peak Found	Not Found	Peak Found	Peak Found
P07814	K.ERPTPSLNNNCTTSEDSLVLYNR.V	[734-756]	P07814 1xPhospho [T745]	[K].ERPTPSLNNNCTTSEDSLVLYNR.[V]	1xCarbamidomethyl [C11]; 1xDeamidated [N9]; 1xPhospho [T12]	Used	0	2761.21	328.6			510.2		61.3					Peak Found	Not Found	Not Found	High	Not Found	Peak Found	Not Found	Not Found	Not Found
P07900	K.ERDKEVSDDEAEEK.E	[225-238]	P07900-2 1xPhospho [S353]; P07900 1xPhospho [S231]	[K].ERDKEVSDDEAEEK.[E]	1xPhospho [S7]	Used	2	1758.71	190	150.2	127.7	55.2	74.2	46.6	70	102.5	83.5		High	High	Peak Found	Peak Found	High	Peak Found	Peak Found	Peak Found	Peak Found
P07900	R.DKEVSDDEAEEKEDK.E	[227-241]	P07900-2 1xPhospho [S353]; P07900 1xPhospho [S231]	[R].DKEVSDDEAEEKEDK.[E]	1xPhospho [S5]	Used	2	1845.73	203.8	131.9	106.7	62.2	71.4	79	77	97.9	70.2		High	High	High	Peak Found	High	High	High	High	Peak Found
P07900	R.DKEVSDDEAEEK.E	[227-238]	P07900-2 1xPhospho [S353]; P07900 1xPhospho [S231]	[R].DKEVSDDEAEEK.[E]	1xPhospho [S5]	Used	1	1473.56	134.2	182.5	93	57.2	61.5	67.5	108.7	102.1	93.3		High	High	Peak Found	High	High	High	High	High	Peak Found
P07900	K.ESEDKPEIEDVGSDEEEEKK.D	[251-270]	P07900-2 1xPhospho [S385]; P07900 1xPhospho [S263]	[K].ESEDKPEIEDVGSDEEEEKK.[D]	1xPhospho [S13]	Used	1	2400.98	366.7	120	114.3	24.9	32.6	18.3	69.3	66.5	87.3		High	High	High	Peak Found	Peak Found	Peak Found	High	High	High
P07900	K.ESEDKPEIEDVGSDEEEEKKDGDK.K	[251-274]	P07900-2 1xPhospho [S]; P07900 1xPhospho [S]	[K].ESEDKPEIEDVGSDEEEEKKDGDK.[K]	1xPhospho [S]	Used	2	2816.15	409.2	98.6	120.1	22.5	44.1	16.4	27	71.9	90.2		High	High	High	High	High	High	High	High	High
P07900	K.ESEDKPEIEDVGSDEEEEK.K	[251-269]	P07900-2 1xPhospho [S]; P07900 1xPhospho [S]	[K].ESEDKPEIEDVGSDEEEEK.[K]	1xPhospho [S]	Used	0	2272.89	166.6	211.4	166.1	12.6	28	11.5	136.4	82.8	84.6		Peak Found	High	High	Peak Found	Peak Found	Peak Found	High	Peak Found	High
P07910-1	K.NDKSEEEQSSSSVK.K	[230-243]	P07910-4 1xPhospho [S177]; P07910-2 1xPhospho [S220]; P07910-1 1xPhospho [S233]; P07910-3 1xPhospho [S153]	[K].NDKSEEEQSSSSVK.[K]	1xPhospho [S4]	Used	1	1633.66		143.8	11.1	216.5	218.6	143.1	3.2	124.3	39.3		Not Found	Peak Found	Peak Found	Peak Found	High	Peak Found	Peak Found	Peak Found	Peak Found
P07910-1	K.QAVEMKNDKSEEEQSSSSVK.K	[224-243]	P07910-4 1xPhospho [S177]; P07910-2 1xPhospho [S220]; P07910-1 1xPhospho [S233]; P07910-3 1xPhospho [S153]	[K].QAVEMKNDKSEEEQSSSSVK.[K]	1xDeamidated [N7]; 1xPhospho [S10]; 1xOxidation [M5]	Used	2	2336.98	177.8	65.1	112.2	44	61.7	46.4	98.7	107.9	186.3		High	Peak Found	Peak Found	Peak Found	Peak Found	Peak Found	Peak Found	Peak Found	Peak Found
P07910-1	K.NDKSEEEQSSSSVK.K	[230-243]	P07910-4 1xPhospho [S177]; P07910-2 1xPhospho [S220]; P07910-1 1xPhospho [S233]; P07910-3 1xPhospho [S153]	[K].NDKSEEEQSSSSVK.[K]	1xDeamidated [N1]; 1xPhospho [S4]	Used	1	1634.64	50.8	182	80.1	90.4	97.2	79.5	120	98.6	101.4		High	Peak Found	Peak Found	Peak Found	High	Peak Found	Peak Found	Peak Found	Peak Found
P07948-1	R.VIEDNEYTAR.E	[391-400]	P07948-1 1xPhospho [Y397]; P07948-2 1xPhospho [Y376]; P08631-4 1xPhospho [Y410]; P08631-3 1xPhospho [Y389]; P08631-2 1xPhospho [Y390]; P08631-1 1xPhospho [Y411]	[R].VIEDNEYTAR.[E]	1xPhospho [Y7]	Used	0	1289.54	118.5	205.7	135.2	4.5		9.4	80.8	215.4	130.5		High	High	High	Peak Found	Not Found	Peak Found	Peak Found	High	Peak Found
P07948-1	K.GKDSLSDDGVDLK.T	[8-20]	P07948-1 1xPhospho [S]; P07948-2 1xPhospho [S]	[K].GKDSLSDDGVDLK.[T]	1xPhospho [S]	Used	1	1428.63	281	165.4	192.2	8.2		6.3	92.7	78.8	75.4		High	High	High	Peak Found	Not Found	Peak Found	High	High	High
P08034	R.RSPGTGAGLAEK.S	[265-276]	P08034 1xPhospho [S266]	[R].RSPGTGAGLAEK.[S]	1xPhospho [S2]	Used	1	1223.58	39.3			43.9	45.5	47.1	263	242.7	218.4		Peak Found	Not Found	Not Found	Peak Found	Peak Found	Peak Found	Peak Found	High	Peak Found
P08034	R.SPGTGAGLAEK.S	[266-276]	P08034 1xPhospho [S266]	[R].SPGTGAGLAEK.[S]	1xPhospho [S1]	Used	0	1067.48				57.5	40.3	49.7	287.2	273.4	191.8		Not Found	Not Found	Not Found	Peak Found	Peak Found	Peak Found	Peak Found	High	Peak Found
P08047	R.SSSTGSSSSTGGGGQESQPSPLALLAATCSR.I	[40-70]	P08047 1xPhospho [T/S]; P08047-2 1xPhospho [T/S]	[R].SSSTGSSSSTGGGGQESQPSPLALLAATCSR.[I]	1xCarbamidomethyl [C29]; 1xPhospho [T/S]	Used	0	3005.32	83.3	110.9	86.9	85.1	67	76	135.3	123.6	131.8		Peak Found	High	High	High	Peak Found	Peak Found	High	Peak Found	Peak Found
P08238	K.EREKEISDDEAEEEK.G	[220-234]	P08238 1xPhospho [S226]	[K].EREKEISDDEAEEEK.[G]	1xPhospho [S7]	Used	2	1915.78	219.2	123.9	148.7	66.1	107.5	26.7		107.8	100.1		Peak Found	Peak Found	High	Peak Found	Peak Found	Peak Found	Not Found	High	Peak Found
P08238	K.LGIHEDSTNR.R	[439-448]	P08238 1xPhospho [S445]	[K].LGIHEDSTNR.[R]	1xPhospho [S7]	Used	0	1221.53	125.8	144.7	127.8	84.6	103.8	102	62.9	77	71.4		Peak Found	Peak Found	High	Peak Found	Peak Found	Peak Found	Peak Found	Peak Found	Peak Found
P08238	K.EQVANSAFVER.V	[492-502]	P08238 1xPhospho [S497]; Q58FF7 1xPhospho [S370]	[K].EQVANSAFVER.[V]	1xPhospho [S6]	Used	0	1329.58		278.9	242.1	51.8	51.2	57.6	120.3	58.5	39.7		Not Found	High	High	Peak Found	Peak Found	Peak Found	Peak Found	Peak Found	Peak Found
P08238	R.EKEISDDEAEEEK.G	[222-234]	P08238 1xPhospho [S226]	[R].EKEISDDEAEEEK.[G]	1xPhospho [S5]	Used	1	1630.64	152.4	145.1	106.4	76.2	92.3	74.2	93.4	77.3	82.7		High	High	High	High	High	High	High	High	High
P08238; Q58FF8	K.IEDVGSDEEDDSGKDKK.K	[250-266]	P08238 2xPhospho [S255; S261]; Q58FF8 2xPhospho [S177; S183]	[K].IEDVGSDEEDDSGKDKK.[K]	2xPhospho [S6; S12]	Not Used	2	2025.76	50.6	252.7	130.3	106.6	134.1	55.3	50.4	65.6	54.4	Shared	High	High	High	Peak Found	High	Peak Found	Peak Found	Peak Found	Peak Found
P08238; Q58FF8	K.IEDVGSDEEDDSGKDKK.K	[172-188]	P08238 2xPhospho [S255; S261]; Q58FF8 2xPhospho [S177; S183]	[K].IEDVGSDEEDDSGKDKK.[K]	2xPhospho [S6; S12]	Not Used	2	2025.76	50.6	252.7	130.3	106.6	134.1	55.3	50.4	65.6	54.4	Shared	High	High	High	Peak Found	High	Peak Found	Peak Found	Peak Found	Peak Found
P08238; Q58FF8	K.IEDVGSDEEDDSGKDK.K	[250-265]	P08238 1xPhospho [S255]; Q58FF8 1xPhospho [S177]	[K].IEDVGSDEEDDSGKDK.[K]	1xPhospho [S6]	Not Used	1	1817.7	156.7	144.1	110.7	82.4	95.8	74.3	81.6	79.2	75.3	Shared	High	High	High	High	High	High	High	High	High
P08238; Q58FF8	K.IEDVGSDEEDDSGK.D	[250-263]	P08238 1xPhospho [S255]; Q58FF8 1xPhospho [S177]	[K].IEDVGSDEEDDSGK.[D]	1xPhospho [S6]	Not Used	0	1574.57	159	151	104.9	79.1	77.9	66.4	99.5	83	79.2	Shared	High	High	High	High	High	High	High	High	High
P08238; Q58FF8	K.EFDGKSLVSVTK.E	[527-538]	P08238 1xPhospho [S532]; Q58FF8 1xPhospho [S305]; Q58FF7 1xPhospho [S405]	[K].EFDGKSLVSVTK.[E]	1xPhospho [S6]	Not Used	1	1389.67	100.7	213.9	180.2	74.2	58.9	74.1	47	90.2	60.8	Shared	Peak Found	High	High	Peak Found	High	Peak Found	Peak Found	Peak Found	High
P08238; Q58FF8	K.IEDVGSDEEDDSGKDK.K	[172-187]	P08238 1xPhospho [S255]; Q58FF8 1xPhospho [S177]	[K].IEDVGSDEEDDSGKDK.[K]	1xPhospho [S6]	Not Used	1	1817.7	156.7	144.1	110.7	82.4	95.8	74.3	81.6	79.2	75.3	Shared	High	High	High	High	High	High	High	High	High
P08238; Q58FF8	K.IEDVGSDEEDDSGK.D	[172-185]	P08238 1xPhospho [S255]; Q58FF8 1xPhospho [S177]	[K].IEDVGSDEEDDSGK.[D]	1xPhospho [S6]	Not Used	0	1574.57	159	151	104.9	79.1	77.9	66.4	99.5	83	79.2	Shared	High	High	High	High	High	High	High	High	High
P08238; Q58FF8	K.EFDGKSLVSVTK.E	[300-311]	P08238 1xPhospho [S532]; Q58FF8 1xPhospho [S305]; Q58FF7 1xPhospho [S405]	[K].EFDGKSLVSVTK.[E]	1xPhospho [S6]	Not Used	1	1389.67	100.7	213.9	180.2	74.2	58.9	74.1	47	90.2	60.8	Shared	Peak Found	High	High	Peak Found	High	Peak Found	Peak Found	Peak Found	High
P08238; Q58FF8	K.IEDVGSDEEDDSGKDKK.K	[250-266]	P08238 1xPhospho [S]; Q58FF8 1xPhospho [S]	[K].IEDVGSDEEDDSGKDKK.[K]	1xPhospho [S]	Not Used	2	1945.79	170.5	121.1	97.9	92.1	88.9	89.4	74.7	86.6	78.9	Shared	High	High	High	High	High	High	High	High	High
P08238; Q58FF8	K.IEDVGSDEEDDSGKDKK.K	[172-188]	P08238 1xPhospho [S]; Q58FF8 1xPhospho [S]	[K].IEDVGSDEEDDSGKDKK.[K]	1xPhospho [S]	Not Used	2	1945.79	170.5	121.1	97.9	92.1	88.9	89.4	74.7	86.6	78.9	Shared	High	High	High	High	High	High	High	High	High
P08240-1	K.KEGSDGPLATSKPVPAEK.S	[174-191]	P08240-1 1xPhospho [S177]; P08240-2 1xPhospho [S149]	[K].KEGSDGPLATSKPVPAEK.[S]	1xPhospho [S4]	Used	1	1890.92	54.8	40.4	68.4	142.6	270.1	246.2	17.4	32	28.1		High	Peak Found	Peak Found	Peak Found	Peak Found	Peak Found	Peak Found	Peak Found	Peak Found
P08397-1	-.MSGNGNAAATAEENSPK.M	[1-17]	P08397-3 1xPhospho [T10]; 1xMet-loss+Acetyl [N-Term]; P08397-1 1xPhospho [T10]; 1xMet-loss+Acetyl [N-Term]	[-].MSGNGNAAATAEENSPK.[M]	1xPhospho [T10]; 1xMet-loss+Acetyl [N-Term]	Used	0	1639.66		111.8	86	107	103.9	128.4	123.7	137.5	101.7		Not Found	Peak Found	Peak Found	Peak Found	Peak Found	Peak Found	Peak Found	Peak Found	High
P08397-1	-.MSGNGNAAATAEENSPK.M	[1-17]	P08397-3 1xPhospho [T/S]; 1xMet-loss+Acetyl [N-Term]; P08397-1 1xPhospho [T/S]; 1xMet-loss+Acetyl [N-Term]	[-].MSGNGNAAATAEENSPK.[M]	1xDeamidated [N]; 1xPhospho [T/S]; 1xMet-loss+Acetyl [N-Term]	Used	0	1640.64		113.7	104.6	62.1	136.2	143.8	104.8	126.4	108.3		Not Found	High	High	Peak Found	High	High	High	High	High
P08559	R.YGMGTSVER.A	[227-235]	P08559 1xPhospho [S232]; P08559-4 1xPhospho [S270]; P08559-2 1xPhospho [S239]; P08559-3 1xPhospho [S201]	[R].YGMGTSVER.[A]	1xPhospho [S6]	Used	0	1079.42		17.1	34.7	215.7	114.6	148	129.4	114.1	126.6		Not Found	Peak Found	Peak Found	Peak Found	Peak Found	High	Peak Found	Peak Found	Peak Found
P08559	R.YHGHSMSDPGVSYR.T	[289-302]	P08559 1xPhospho [S]; P08559-4 1xPhospho [S]; P08559-2 1xPhospho [S]; P08559-3 1xPhospho [S]; P29803 1xPhospho [S]	[R].YHGHSMSDPGVSYR.[T]	1xPhospho [S]; 1xOxidation [M6]	Used	0	1688.65	85.1	155.6	238.2	80.8	101.5	53.6	15.5	54	115.8		High	High	High	High	Peak Found	High	Peak Found	High	High
P08559	R.YHGHSMSDPGVSYR.T	[289-302]	P08559 1xPhospho [S]; P08559-4 1xPhospho [S]; P08559-2 1xPhospho [S]; P08559-3 1xPhospho [S]; P29803 1xPhospho [S]	[R].YHGHSMSDPGVSYR.[T]	1xPhospho [S]	Used	0	1672.66	109.8	82.8	237.9	129.9	101.9	48.9	16.4	64.9	107.5		High	High	High	High	High	High	Peak Found	High	High
P08559	R.YGMGTSVER.A	[227-235]	P08559 1xPhospho [S/T]; P08559-4 1xPhospho [S/T]; P08559-2 1xPhospho [S/T]; P08559-3 1xPhospho [S/T]	[R].YGMGTSVER.[A]	1xPhospho [S/T]; 1xOxidation [M3]	Used	0	1095.42	4	12.3	14.8	127.9	80.2	159.7	183.8	85.1	232.3		Peak Found	Peak Found	Peak Found	High	Peak Found	High	Peak Found	High	High
P08581-1	R.SVSPTTEMVSNESVDYR.A	[988-1004]	P08581-2 1xPhospho [T/S]; P08581-1 1xPhospho [T/S]	[R].SVSPTTEMVSNESVDYR.[A]	1xPhospho [T/S]; 1xOxidation [M8]	Used	0	1996.82	154.8	185.4	163.8	77.9	84.9	89	31.4	52.3	60.4		High	High	Peak Found	Peak Found	High	Peak Found	Peak Found	Peak Found	Peak Found
P08581-1	R.SVSPTTEMVSNESVDYR.A	[988-1004]	P08581-2 1xPhospho [S/T]; P08581-1 1xPhospho [S/T]	[R].SVSPTTEMVSNESVDYR.[A]	1xPhospho [S/T]	Used	0	1980.83	82.6	227.3	220.2	116.1		95.7		100.4	57.7		Peak Found	High	High	High	Not Found	Peak Found	Not Found	Peak Found	Peak Found
P08621-1	R.DDTSRYDERPGPSPLPHR.D	[214-231]	P08621-1 1xPhospho [S226]; P08621-4 1xPhospho [S130]	[R].DDTSRYDERPGPSPLPHR.[D]	1xPhospho [S13]	Used	1	2174.96	79.5	52.7	179.9	68	131.7	119.5	24.3	103.6	140.9		Peak Found	Peak Found	High	Peak Found	Peak Found	Peak Found	Peak Found	Peak Found	High
P08621-1	R.YDERPGPSPLPHR.D	[219-231]	P08621-1 1xPhospho [S/Y]; P08621-4 1xPhospho [S/Y]	[R].YDERPGPSPLPHR.[D]	1xPhospho [S/Y]	Used	0	1600.73	143	69.8	101.5	99.3	110.6	102.4	43.4	119	111.1		High	High	High	High	High	High	High	High	High
P08648	R.LLESSLSSSEGEEPVEYK.S	[120-137]	P08648 1xPhospho [S124]	[R].LLESSLSSSEGEEPVEYK.[S]	1xPhospho [S5]	Used	0	2062.91		424.3	475.7								Not Found	High	Peak Found	Not Found	Not Found	Not Found	Not Found	Not Found	Not Found
P08651	K.SPFNSPSPQDSPR.L	[333-345]	P08651-6 1xPhospho [S339]; P08651 1xPhospho [S339]; P08651-2 1xPhospho [S330]; P08651-3 1xPhospho [S330]; P08651-4 1xPhospho [S306]; P08651-5 1xPhospho [S339]	[K].SPFNSPSPQDSPR.[L]	1xPhospho [S7]	Used	0	1495.62	147.2	214	141	91.7	71.8	62.5	72	63.5	36.3		High	High	Peak Found	High	Peak Found	Peak Found	Peak Found	Peak Found	Peak Found
P08651	K.TEMDKSPFNSPSPQDSPR.L	[328-345]	P08651-6 1xPhospho [S339]; P08651 1xPhospho [S339]; P08651-2 1xPhospho [S330]; P08651-3 1xPhospho [S330]; P08651-4 1xPhospho [S306]; P08651-5 1xPhospho [S339]	[K].TEMDKSPFNSPSPQDSPR.[L]	1xPhospho [S12]	Used	1	2099.87	152.1	147.3	273.3	81.8	71.3	47.6	35.6	42.2	48.9		Peak Found	Peak Found	High	Peak Found	Peak Found	Peak Found	Peak Found	Peak Found	Peak Found
P08651	R.NWTEDMEGGISSPVKK.T	[312-327]	P08651-6 1xPhospho [S322]; P08651 1xPhospho [S322]; P08651-2 1xPhospho [S313]; P08651-3 1xPhospho [S313]; P08651-4 1xPhospho [S289]; P08651-5 1xPhospho [S322]	[R].NWTEDMEGGISSPVKK.[T]	1xPhospho [S11]; 1xOxidation [M6]	Used	1	1873.8	181.8	260.4	86.5	71.6	61.8	81.5	34.5	58	63.9		High	High	Peak Found	Peak Found	Peak Found	Peak Found	Peak Found	Peak Found	Peak Found
P08651	K.TEMDKSPFNSPSPQDSPR.L	[328-345]	P08651-6 1xPhospho [S]; P08651 1xPhospho [S]; P08651-2 1xPhospho [S]; P08651-3 1xPhospho [S]; P08651-4 1xPhospho [S]; P08651-5 1xPhospho [S]	[K].TEMDKSPFNSPSPQDSPR.[L]	1xPhospho [S]; 1xOxidation [M3]	Used	1	2115.87	137.9	229.5	146.6	84.2	79.2	79.2		63.1	80.2		High	High	Peak Found	Peak Found	Peak Found	Peak Found	Not Found	Peak Found	Peak Found
P08651	R.NWTEDMEGGISSPVKK.T	[312-327]	P08651-6 1xPhospho [S]; P08651 1xPhospho [S]; P08651-2 1xPhospho [S]; P08651-3 1xPhospho [S]; P08651-4 1xPhospho [S]; P08651-5 1xPhospho [S]	[R].NWTEDMEGGISSPVKK.[T]	1xPhospho [S]	Used	1	1857.81	33.3	294.7	122.9	110	82.4	56.8	46.3	81.2	72.3		Peak Found	High	Peak Found	Peak Found	High	Peak Found	Peak Found	Peak Found	Peak Found
P08670	R.SLYASSPGGVYATR.S	[51-64]	P08670 1xPhospho [S56]	[R].SLYASSPGGVYATR.[S]	1xPhospho [S6]	Used	0	1508.68							246.2	382.3	271.5		Not Found	Not Found	Not Found	Not Found	Not Found	Not Found	High	High	High
P08727; P08727	R.APSIHGGSGGR.G	[33-43]	P08727 1xPhospho [S35]; P19001 1xPhospho [S35]; P08727 1xPhospho [S35]	[R].APSIHGGSGGR.[G]	1xPhospho [S3]	Not Used	0	1075.47	43	81.9	35.2	250.5	210.7	180.2	15.6	40	42.8	Shared	High	High	High	High	High	High	High	High	High
P08727; P08727	R.APSIHGGSGGR.G	[33-43]	P08727 1xPhospho [S35]; P19001 1xPhospho [S35]; P08727 1xPhospho [S35]	[R].APSIHGGSGGR.[G]	1xPhospho [S3]	Not Used	0	1075.47	43	81.9	35.2	250.5	210.7	180.2	15.6	40	42.8	Shared	High	High	High	High	High	High	High	High	High
P08727; P08727	R.QSSATSSFGGLGGGSVR.F	[8-24]	P08727 1xPhospho [S9]; P08727 1xPhospho [S9]	[R].QSSATSSFGGLGGGSVR.[F]	1xPhospho [S2]	Not Used	0	1634.72	106.6	150.4	124.3	142.6	113.8	99.6	39.3	59.2	64.3	Shared	Peak Found	Peak Found	Peak Found	High	Peak Found	Peak Found	Peak Found	Peak Found	Peak Found
P08727; P08727	R.QSSATSSFGGLGGGSVR.F	[8-24]	P08727 1xPhospho [S9]; P08727 1xPhospho [S9]	[R].QSSATSSFGGLGGGSVR.[F]	1xPhospho [S2]	Not Used	0	1634.72	106.6	150.4	124.3	142.6	113.8	99.6	39.3	59.2	64.3	Shared	Peak Found	Peak Found	Peak Found	High	Peak Found	Peak Found	Peak Found	Peak Found	Peak Found
P09496-2	R.AAEEAFVNDIDESSPGTEWER.V	[163-183]	P09496-2 1xPhospho [S]; P09496-5 1xPhospho [S]	[R].AAEEAFVNDIDESSPGTEWER.[V]	1xPhospho [S]	Used	0	2431.99	25.1	378.7	186.4		97.5	75.7		60.9	75.7		High	High	Peak Found	Not Found	Peak Found	Peak Found	Not Found	Peak Found	Peak Found
P09651-2	-.MSKSESPKEPEQLR.K	[1-14]	P09651-2 2xPhospho [S4; S]; 1xMet-loss+Acetyl [N-Term]; P09651-3 2xPhospho [S4; S]; 1xMet-loss+Acetyl [N-Term]; P09651-1 2xPhospho [S4; S]; 1xMet-loss+Acetyl [N-Term]	[-].MSKSESPKEPEQLR.[K]	2xPhospho [S4; S]; 1xMet-loss+Acetyl [N-Term]	Used	2	1716.72	92.2	101.6	101.7	55.1	91.7	68.9	126.9	123.7	138.1		High	High	High	High	High	High	High	High	High
P09651-2	-.MSKSESPKEPEQLR.K	[1-14]	P09651-2 1xPhospho [S]; 1xMet-loss+Acetyl [N-Term]; P09651-3 1xPhospho [S]; 1xMet-loss+Acetyl [N-Term]; P09651-1 1xPhospho [S]; 1xMet-loss+Acetyl [N-Term]	[-].MSKSESPKEPEQLR.[K]	1xPhospho [S]; 1xMet-loss+Acetyl [N-Term]	Used	2	1636.76	64.1	83.4	110.2	46.8	70.5	80.6	113.1	153.3	178		High	High	High	High	High	High	High	High	High
P09651-2	K.SESPKEPEQLRK.L	[4-15]	P09651-2 1xPhospho [S]; P09651-3 1xPhospho [S]; P09651-1 1xPhospho [S]	[K].SESPKEPEQLRK.[L]	1xPhospho [S]	Used	2	1507.72	123.6	72.1	96.3	53	79.2	70.4	109.3	132.2	163.9		High	High	High	High	High	High	High	High	High
P09651-2	K.SESPKEPEQLR.K	[4-14]	P09651-2 1xPhospho [S]; P09651-3 1xPhospho [S]; P09651-1 1xPhospho [S]	[K].SESPKEPEQLR.[K]	1xPhospho [S]	Used	1	1379.62	112.4	92.6	84.7	57.2	67.6	60.2	141.5	140.8	143		High	High	High	High	High	High	High	High	High
P09874	R.GGSDDSSKDPIDVNYEK.L	[780-796]	P09874 1xPhospho [S]	[R].GGSDDSSKDPIDVNYEK.[L]	1xPhospho [S]	Used	1	1905.77	99.4	114.1	159.6		64.2	53.2	168	129	112.4		High	Peak Found	Peak Found	Not Found	Peak Found	Peak Found	High	High	Peak Found
P09884	K.IASPVSR.K	[207-213]	P09884 1xPhospho [S209]	[K].IASPVSR.[K]	1xPhospho [S3]	Used	0	809.392	47.3	63.3	55.3	52.8	26.9	45.2	187	244.2	178.2		Peak Found	Peak Found	Peak Found	Peak Found	Peak Found	Peak Found	Peak Found	Peak Found	High
P09884	R.SIGASPNPFSVHTATAVPSGK.I	[186-206]	P09884 1xPhospho [S]	[R].SIGASPNPFSVHTATAVPSGK.[I]	1xPhospho [S]	Used	0	2105.01	109.8	160.6	42.3	122.3	74.5	120.9	81.5	108.2	79.9		High	High	High	High	High	High	High	High	High
P0C1Z6	K.LLPYPTLASPASD.-	[241-253]	P0C1Z6 1xPhospho [S252]; P0C1Z6-2 1xPhospho [S243]	[K].LLPYPTLASPASD.[-]	1xPhospho [S12]	Used	0	1424.67	58.9	89	78.5	118.2	87.2		229.9	140.2	98.2		Peak Found	Peak Found	High	Peak Found	Peak Found	Not Found	High	Peak Found	Peak Found
P0C1Z6	R.RTPAPPEPGSPAPGEGPSGR.K	[171-190]	P0C1Z6 1xPhospho [S180]; P0C1Z6-2 1xPhospho [S171]	[R].RTPAPPEPGSPAPGEGPSGR.[K]	1xPhospho [S10]	Used	1	1993.91	73.5	64.4	78.6	95.6	86.3	90.3	99.8	151.4	160		High	High	High	High	Peak Found	High	High	High	High
P0CAP2-1	K.SGSPISSEER.R	[268-277]	P0CAP1-11 1xPhospho [S452]; P0CAP2-3 1xPhospho [S270]; P0CAP2-1 1xPhospho [S270]; P0CAP2-2 1xPhospho [S113]	[K].SGSPISSEER.[R]	1xPhospho [S3]	Not Used	0	1128.46										No Quan Values	Peak Found	Peak Found	High	High	Peak Found	High	High	Peak Found	High
P10075	R.SPGSQAPDEGAGGALR.S	[86-101]	P10075 1xPhospho [S86]	[R].SPGSQAPDEGAGGALR.[S]	1xPhospho [S1]	Used	0	1549.66	159	186.5	156.3	74	66.5	80.8	63.4	53.9	59.7		High	High	Peak Found	High	Peak Found	High	Peak Found	Peak Found	Peak Found
P10301	R.KYQEQELPPSPPSAPR.K	[192-207]	P10301 1xPhospho [S201]	[R].KYQEQELPPSPPSAPR.[K]	1xPhospho [S10]	Used	1	1903.89	153.4	239.5		145.6	185.1	176.4					Peak Found	High	Not Found	Peak Found	Peak Found	Peak Found	Not Found	Not Found	Not Found
P10398-1	R.GSPSPASVSSGR.K	[256-267]	P10398-1 1xPhospho [S257]	[R].GSPSPASVSSGR.[K]	1xPhospho [S2]	Used	0	1168.5			108.8				233.9	304.3	253.1		Not Found	Not Found	Peak Found	Not Found	Not Found	Not Found	High	Peak Found	Peak Found
P10412	-.MSETAPAAPAAPAPAEKTPVK.K	[1-21]	P10412 1xPhospho [T18]; 1xMet-loss+Acetyl [N-Term]	[-].MSETAPAAPAAPAPAEKTPVK.[K]	1xPhospho [T18]; 1xMet-loss+Acetyl [N-Term]	Used	1	2025.99	136.2	163	82.1	96.8	27.5	28.3	91.5	163.5	111.1		High	High	High	High	Peak Found	Peak Found	Peak Found	High	High
P10412	-.MSETAPAAPAAPAPAEKTPVKK.K	[1-22]	P10412 1xPhospho [T18]; 1xMet-loss+Acetyl [N-Term]	[-].MSETAPAAPAAPAPAEKTPVKK.[K]	1xPhospho [T18]; 1xMet-loss+Acetyl [N-Term]	Used	2	2154.08	145.4	139.5	91.3	98.1	29.4	28	70.4	168	130		High	High	High	High	High	High	High	High	High
P10412	-.MSETAPAAPAAPAPAEK.T	[1-17]	P10412 1xPhospho [S2]; 1xMet-loss+Acetyl [N-Term]	[-].MSETAPAAPAAPAPAEK.[T]	1xPhospho [S2]; 1xMet-loss+Acetyl [N-Term]	Used	0	1600.73	900										High	High	High	Peak Found	High	Peak Found	Peak Found	Peak Found	Peak Found
P10636	K.AKTDHGAEIVYKSPVVSGDTSPR.H	[701-723]	P10636-6 2xPhospho [Y/T/S]; P10636-2 2xPhospho [Y/T/S]; P10636-4 2xPhospho [Y/T/S]; P10636-3 2xPhospho [Y/T/S]; P10636-9 2xPhospho [Y/T/S]; P10636-7 2xPhospho [Y/T/S]; P10636-8 2xPhospho [Y/T/S]; P10636 2xPhospho [Y/T/S]; P10636-5 2xPhospho [Y/T/S]; sp 2xPhospho [Y/T/S]	[K].AKTDHGAEIVYKSPVVSGDTSPR.[H]	2xPhospho [Y/T/S]	Used	2	2574.16	409.9	108.9	356.1		6.7		13.6		4.8		High	Peak Found	High	Not Found	Peak Found	Not Found	Peak Found	Not Found	Peak Found
P10636	K.TDHGAEIVYKSPVVSGDTSPR.H	[703-723]	P10636-6 2xPhospho [S/Y/T]; P10636-2 2xPhospho [S/Y/T]; P10636-4 2xPhospho [S/Y/T]; P10636-3 2xPhospho [S/Y/T]; P10636-9 2xPhospho [S/Y/T]; P10636-7 2xPhospho [S/Y/T]; P10636-8 2xPhospho [S/Y/T]; P10636 2xPhospho [S/Y/T]; P10636-5 2xPhospho [S/Y/T]; sp 2xPhospho [S/Y/T]	[K].TDHGAEIVYKSPVVSGDTSPR.[H]	2xPhospho [S/Y/T]	Used	1	2375.03	324.8	209.4	334.2	13.7	17.9						High	High	High	Peak Found	Peak Found	Not Found	Not Found	Not Found	Not Found
P10636	K.TPPAPKTPPSSGEPPKSGDR.S	[492-511]	P10636-6 1xPhospho [T/S]; P10636-2 1xPhospho [T/S]; P10636-4 1xPhospho [T/S]; P10636-3 1xPhospho [T/S]; P10636-7 1xPhospho [T/S]; P10636-8 1xPhospho [T/S]; P10636 1xPhospho [T/S]; P10636-5 1xPhospho [T/S]; sp 1xPhospho [T/S]	[K].TPPAPKTPPSSGEPPKSGDR.[S]	1xPhospho [T/S]	Used	2	2082.99	180.5	252.4	347.2	84.4			35.5				High	High	High	Peak Found	Not Found	Not Found	Peak Found	Not Found	Not Found
P10636	K.TPPAPKTPPSSGEPPK.S	[492-507]	P10636-6 1xPhospho [T]; P10636-2 1xPhospho [T]; P10636-4 1xPhospho [T]; P10636-3 1xPhospho [T]; P10636-7 1xPhospho [T]; P10636-8 1xPhospho [T]; P10636 1xPhospho [T]; P10636-5 1xPhospho [T]; sp 1xPhospho [T]	[K].TPPAPKTPPSSGEPPK.[S]	1xPhospho [T/S]	Used	1	1667.8	369	291.5	239.5								High	High	High	Not Found	Not Found	Not Found	Not Found	Not Found	Not Found
P10636	R.SRTPSLPTPPTREPK.K	[527-541]	P10636-6 1xPhospho [T/S]; P10636-2 1xPhospho [T/S]; P10636-4 1xPhospho [T/S]; P10636-3 1xPhospho [T/S]; P10636-9 1xPhospho [T/S]; P10636-7 1xPhospho [T/S]; P10636-8 1xPhospho [T/S]; P10636 1xPhospho [T/S]; P10636-5 1xPhospho [T/S]; sp 1xPhospho [T/S]	[R].SRTPSLPTPPTREPK.[K]	1xPhospho [T/S]	Used	2	1743.88	367	304.8	228.2								High	High	Peak Found	Not Found	Not Found	Not Found	Not Found	Not Found	Not Found
P10636	R.SGYSSPGSPGTPGSR.S	[512-526]	P10636-6 1xPhospho [S/Y]; P10636-2 1xPhospho [S/Y]; P10636-4 1xPhospho [S/Y]; P10636-3 1xPhospho [S/Y]; P10636-9 1xPhospho [S/Y]; P10636-7 1xPhospho [S/Y]; P10636-8 1xPhospho [S/Y]; P10636 1xPhospho [S/Y]; P10636-5 1xPhospho [S/Y]; sp 1xPhospho [S/Y]	[R].SGYSSPGSPGTPGSR.[S]	1xPhospho [S/Y]	Used	0	1473.6		454.5	445.5								Not Found	High	High	Not Found	Not Found	Not Found	Not Found	Not Found	Not Found
P10636	K.SPVVSGDTSPR.H	[713-723]	P10636-6 1xPhospho [S/T]; P10636-2 1xPhospho [S/T]; P10636-4 1xPhospho [S/T]; P10636-3 1xPhospho [S/T]; P10636-9 1xPhospho [S/T]; P10636-7 1xPhospho [S/T]; P10636-8 1xPhospho [S/T]; P10636 1xPhospho [S/T]; P10636-5 1xPhospho [S/T]; sp 1xPhospho [S/T]	[K].SPVVSGDTSPR.[H]	1xPhospho [S/T]	Used	0	1181.52	277.6	322.6	259.4	8.6	5.4	4.7	7.6	7.1	7.1		High	High	High	High	High	Peak Found	High	High	High
P10644	R.TDSREDEISPPPPNPVVK.G	[75-92]	P10644 2xPhospho [S77; S83]; P10644-2 2xPhospho [S77; S83]	[R].TDSREDEISPPPPNPVVK.[G]	2xPhospho [S3; S9]	Used	1	2136.93	192.6	375.2	194.8		38.7		64.6	34			High	High	High	Not Found	Peak Found	Not Found	Peak Found	Peak Found	Not Found
P10644	R.TDSREDEISPPPPNPVVK.G	[75-92]	P10644 1xPhospho [T/S]; P10644-2 1xPhospho [T/S]	[R].TDSREDEISPPPPNPVVK.[G]	1xPhospho [T/S]	Used	1	2056.96	199.1	173.9	177.9	24.3	24.2	25.9	85.3	90.5	99		High	High	High	High	High	High	High	High	High
P10644	R.EDEISPPPPNPVVK.G	[79-92]	P10644 1xPhospho [S83]; P10644-2 1xPhospho [S83]	[R].EDEISPPPPNPVVK.[G]	1xPhospho [S5]	Used	0	1597.75	147.1	173.3	156.8	35.7	33.3	26.9	121.8	105	100.1		High	High	High	Peak Found	Peak Found	Peak Found	High	High	High
P10809	R.TVIIEQSWGSPK.V	[61-72]	P10809 1xPhospho [S70]; P10809-2 1xPhospho [S70]	[R].TVIIEQSWGSPK.[V]	1xPhospho [S10]	Used	0	1424.68	107	135.7	57.6	126.4	120	142.1	39.2	102.4	69.7		Peak Found	High	High	High	High	Peak Found	High	High	High
P11137	R.VDHGAEIITQSPGR.S	[1772-1785]	P11137-3 1xPhospho [S1778]; P11137-4 1xPhospho [S514]; P11137 1xPhospho [S1782]; P11137-2 1xPhospho [S426]	[R].VDHGAEIITQSPGR.[S]	1xPhospho [S11]	Used	0	1559.72	291.4	227.6	268.8	30.9	38.4	42.7					Peak Found	High	High	Peak Found	Peak Found	Peak Found	Not Found	Not Found	Not Found
P11142-1	K.GRLSKEDIER.M	[508-517]	P11142-1 1xPhospho [S511]	[K].GRLSKEDIER.[M]	1xPhospho [S4]	Used	2	1282.62	37.8			207.9	378.2	192.7		83.3			Peak Found	Not Found	Not Found	Peak Found	High	Peak Found	Not Found	Peak Found	Not Found
P11171-1	K.IEVKEESPQSK.A	[182-192]	P11171-7 1xPhospho [S188]; P11171-1 1xPhospho [S188]; P11171-2 1xPhospho [S188]; P11171-5 1xPhospho [S188]	[K].IEVKEESPQSK.[A]	1xPhospho [S7]	Used	1	1353.63	52.5	46.7	33.1	36.5	41.3	37.4	239.3	223.1	190.1		Peak Found	High	High	High	High	High	High	High	High
P11274-1	R.ASASRPQPAPADGADPPPAEEPEARPDGEGSPGK.A	[92-125]	P11274-1 1xPhospho [S122]; P11274-2 1xPhospho [S122]	[R].ASASRPQPAPADGADPPPAEEPEARPDGEGSPGK.[A]	1xPhospho [S31]	Used	0	3388.51	125	50.7	115.4	96.3	112.6	86	109.9	93.4	110.6		Peak Found	Peak Found	Peak Found	Peak Found	Peak Found	High	High	High	Peak Found
P11274-1	R.HQDGLPYIDDSPSSSPHLSSK.G	[449-469]	P11274-1 1xPhospho [S/Y]; P11274-2 1xPhospho [S/Y]	[R].HQDGLPYIDDSPSSSPHLSSK.[G]	1xPhospho [S/Y]	Used	0	2347.02	58.8	103.8	111.5	99.5	99.9	108.8	121.1	76.1	120.4		Peak Found	Peak Found	High	Peak Found	Peak Found	Peak Found	Peak Found	Peak Found	High
P11388-1	K.IKNENTEGSPQEDGVELEGLK.Q	[1239-1259]	P11388-1 1xPhospho [T1244]; P11388-2 1xPhospho [T1270]; P11388-3 1xPhospho [T1280]; P11388-4 1xPhospho [T1325]	[K].IKNENTEGSPQEDGVELEGLK.[Q]	1xDeamidated [N3]; 1xPhospho [T6]	Not Used	1	2367.06										No Quan Values	Not Found	Not Found	Not Found	Not Found	High	Not Found	Not Found	Not Found	Not Found
P11388-1	K.RKPSTSDDSDSNFEK.I	[1466-1480]	P11388-1 1xPhospho [T1470]; P11388-2 1xPhospho [T1496]; P11388-3 1xPhospho [T1506]; P11388-4 1xPhospho [T1551]	[K].RKPSTSDDSDSNFEK.[I]	1xPhospho [T5]	Used	1	1792.74	83.3			92.6	118.1	149.7	108	196.1	152.2		Peak Found	Not Found	Not Found	Peak Found	Peak Found	High	Peak Found	Peak Found	Peak Found
P11388-1	K.NENTEGSPQEDGVELEGLK.Q	[1241-1259]	P11388-1 1xPhospho [T/S]; P11388-2 1xPhospho [T/S]; P11388-3 1xPhospho [T/S]; P11388-4 1xPhospho [T/S]	[K].NENTEGSPQEDGVELEGLK.[Q]	1xPhospho [T/S]	Used	0	2124.9		38		45.9	59.5	69.6	336	185.3	165.7		Not Found	Peak Found	Not Found	Peak Found	Peak Found	Peak Found	High	High	Peak Found
P11388-1	K.TQMAEVLPSPR.G	[1205-1215]	P11388-1 1xPhospho [S1213]; P11388-2 1xPhospho [S1239]; P11388-3 1xPhospho [S1249]; P11388-4 1xPhospho [S1294]	[K].TQMAEVLPSPR.[G]	1xPhospho [S9]	Used	0	1308.6				111.2	102.2	85.6	192.6	218.1	190.3		Not Found	Not Found	Not Found	Peak Found	Peak Found	Peak Found	Peak Found	High	Peak Found
P11388-1	K.VPDEEENEESDNEKETEK.S	[1097-1114]	P11388-1 1xPhospho [S1106]; P11388-2 1xPhospho [S1132]; P11388-3 1xPhospho [S1142]; P11388-4 1xPhospho [S1187]	[K].VPDEEENEESDNEKETEK.[S]	1xPhospho [S10]	Used	1	2229.86	37	30.4	28.6	85.8	138.4	124.6	176.3	159.2	119.7		High	Peak Found	Peak Found	Peak Found	High	Peak Found	High	High	High
P11388-1	R.KPSTSDDSDSNFEK.I	[1467-1480]	P11388-1 1xPhospho [S]; P11388-2 1xPhospho [S]; P11388-3 1xPhospho [S]; P11388-4 1xPhospho [S]	[R].KPSTSDDSDSNFEK.[I]	1xPhospho [S]	Used	0	1636.64	112.6	34.2	34.3	106.2	114.8	104.7	106.9	161.1	125.2		Peak Found	Peak Found	Peak Found	Peak Found	High	High	Peak Found	High	High
P11388-1	K.IKNENTEGSPQEDGVELEGLK.Q	[1239-1259]	P11388-1 1xPhospho [S/T]; P11388-2 1xPhospho [S/T]; P11388-3 1xPhospho [S/T]; P11388-4 1xPhospho [S/T]	[K].IKNENTEGSPQEDGVELEGLK.[Q]	1xPhospho [S/T]	Used	1	2366.08	22.3	22.4	23.5	52	74.5	81.3	245.5	186.1	192.3		High	Peak Found	Peak Found	Peak Found	Peak Found	Peak Found	High	High	High
P11717	K.ALSSLHGDDQDSEDEVLTIPEVK.V	[2398-2420]	P11717 1xPhospho [S2409]	[K].ALSSLHGDDQDSEDEVLTIPEVK.[V]	1xDeamidated [Q10]; 1xPhospho [S12]	Not Used	0	2578.14										No Quan Values	Not Found	Not Found	Not Found	High	Not Found	Not Found	Not Found	Not Found	Not Found
P11717	K.ALSSLHGDDQDSEDEVLTIPEVK.V	[2398-2420]	P11717 1xPhospho [T/S]	[K].ALSSLHGDDQDSEDEVLTIPEVK.[V]	1xPhospho [T/S]	Used	0	2577.16	121.7	155.5	119.4	66.6	72.4	32.3	156	65.2	110.9		High	High	High	High	High	High	High	High	High
P11831	K.ALIQTCLNSPDSPPRSDPTTDQR.M	[213-235]	P11831 1xPhospho [S]	[K].ALIQTCLNSPDSPPRSDPTTDQR.[M]	1xCarbamidomethyl [C6]; 1xPhospho [S]	Used	1	2649.2	104.2	128.7	139.5	60.3	59.8	60.7	120.2	105.3	121.4		Peak Found	High	High	Peak Found	Peak Found	Peak Found	High	Peak Found	High
P12268	K.YPNLQVIGGNVVTAAQAK.N	[294-311]	P12268 1xPhospho [Y294]	[K].YPNLQVIGGNVVTAAQAK.[N]	2xDeamidated [N3; N10]; 1xPhospho [Y1]	Not Used	0	1924.94										No Quan Values	High	Not Found	Not Found	Not Found	Not Found	Not Found	Not Found	Not Found	Not Found
P12268	R.LVGIISSR.D	[154-161]	P12268 1xPhospho [S159]	[R].LVGIISSR.[D]	1xPhospho [S6]	Used	0	924.491	151.5	152.8	109	63.8	56.2	52.3	112.8	116.9	84.7		High	Peak Found	Peak Found	Peak Found	Peak Found	Peak Found	High	Peak Found	Peak Found
P12268	R.GMGSLDAMDKHLSSQNR.Y	[413-429]	P12268 1xPhospho [S416]	[R].GMGSLDAMDKHLSSQNR.[Y]	1xPhospho [S4]; 1xOxidation [M2]	Used	1	1942.81	71.4	128.7	194.1		98.4	119.9		110.8	176.7		Peak Found	Peak Found	High	Not Found	Peak Found	Peak Found	Not Found	Peak Found	Peak Found
P12270	K.RPSTSQTVSTPAPVPVIESTEAIEAK.A	[644-669]	P12270-2 1xPhospho [T/S]; P12270 1xPhospho [T/S]	[K].RPSTSQTVSTPAPVPVIESTEAIEAK.[A]	1xPhospho [T/S]	Used	0	2775.38	102.7	127.5	117.8	87.7	48.8	60.6	66.8	120.4	167.6		Peak Found	High	High	High	Peak Found	Peak Found	Peak Found	Peak Found	Peak Found
P12270	R.TDGFAEAIHSPQVAGVPR.F	[2146-2163]	P12270 1xPhospho [S2155]	[R].TDGFAEAIHSPQVAGVPR.[F]	1xPhospho [S10]	Used	0	1931.9		72.6		120.3		44.3	121.7	222.5	318.7		Not Found	Peak Found	Not Found	Peak Found	Not Found	Peak Found	Peak Found	High	High
P12645	K.SLKPSNHATIQSIVR.A	[410-424]	P12645 1xPhospho [T418]	[K].SLKPSNHATIQSIVR.[A]	1xDeamidated [N6]; 1xPhospho [T9]	Used	0	1731.88	35.3	24	45.6	110	156.2	130	67.8	140.8	190.3		Peak Found	Peak Found	Peak Found	Peak Found	Peak Found	Peak Found	High	Peak Found	Peak Found
P12694	R.IGHHSTSDDSSAYR.S	[333-346]	P12694-2 1xPhospho [S/T]; P12694 1xPhospho [S/T]	[R].IGHHSTSDDSSAYR.[S]	1xPhospho [S/T]	Used	0	1612.64	35.8	21	27.9	189.9	239.2	210.5	29.7	71	75.1		High	High	High	High	High	High	High	High	High
P12755	K.VVSSPPCAAAVSR.A	[429-441]	P12755 1xPhospho [S432]	[K].VVSSPPCAAAVSR.[A]	1xCarbamidomethyl [C7]; 1xPhospho [S4]	Used	0	1380.63		169.2	137.9			67	176.6	210.7	138.5		Not Found	High	Peak Found	Not Found	Not Found	Peak Found	Peak Found	Peak Found	Peak Found
P12763	R.HTFSGVASVESSSGEAFHVGK.T	[313-333]	P12763 1xPhospho [S]	[R].HTFSGVASVESSSGEAFHVGK.[T]	1xPhospho [S]	Used	0	2199.97	19.9	63.2	86.8	92.2	255.7	45.9	24.4	82.2	229.6		Peak Found	High	High	High	High	High	Peak Found	High	High
P12763	K.CDSSPDSAEDVR.K	[132-143]	P12763 1xPhospho [S138]; P02765 1xPhospho [S138]	[K].CDSSPDSAEDVR.[K]	1xCarbamidomethyl [C1]; 1xPhospho [S7]	Used	0	1417.49		93.4	110.5	119.7	275.9	63.4	42.4	87.2	107.6		Not Found	Peak Found	High	High	High	Peak Found	High	High	High
P12763	K.CDSSPDSAEDVRK.L	[132-144]	P12763 1xPhospho [S]; P02765 1xPhospho [S]	[K].CDSSPDSAEDVRK.[LV]	1xCarbamidomethyl [C1]; 1xPhospho [S]	Used	1	1545.59	37.9	66.4	91.4	89.2	237.4	59.8	41.1	103.6	173.3		High	High	High	High	High	High	High	High	High
P12931	R.SLEPAENVHGAGGGAFPASQTPSKPASADGHR.G	[17-48]	P12931-2 1xPhospho [S17]; P12931 1xPhospho [S17]	[R].SLEPAENVHGAGGGAFPASQTPSKPASADGHR.[G]	1xPhospho [S1]	Used	0	3180.45	79.2		68	215.3	346.7	136.1			54.8		High	Not Found	Peak Found	High	High	High	Not Found	Not Found	Peak Found
P13051	K.KAPAGQEEPGTPPSSPLSAEQLDR.I	[50-73]	P13051 2xPhospho [S63; S64]; P13051-2 2xPhospho [S54; S55]	[K].KAPAGQEEPGTPPSSPLSAEQLDR.[I]	2xPhospho [S14; S15]	Used	1	2622.15	61.7	88.9	83.9	91.7	147.4	122.3	109.3	110.3	84.6		Peak Found	Peak Found	High	High	Peak Found	High	High	High	High
P13051	K.RHAPSPEPAVQGTGVAGVPEESGDAAAIPAK.K	[19-49]	P13051 1xPhospho [T31]	[K].RHAPSPEPAVQGTGVAGVPEESGDAAAIPAK.[K]	1xPhospho [T13]	Used	1	3046.46					631.9				268.1		Not Found	Not Found	Not Found	Not Found	High	Not Found	Not Found	Not Found	Peak Found
P13051	K.KAPAGQEEPGTPPSSPLSAEQLDR.I	[50-73]	P13051 1xPhospho [T60]; P13051-2 1xPhospho [T51]	[K].KAPAGQEEPGTPPSSPLSAEQLDR.[I]	1xPhospho [T11]	Used	1	2542.18	53.5	64.2	77.1	127.7	160.4	134.1	91.3	103.6	88.1		Peak Found	High	High	High	High	High	High	High	High
P13051	K.APAGQEEPGTPPSSPLSAEQLDR.I	[51-73]	P13051 1xPhospho [T/S]; P13051-2 1xPhospho [T/S]	[K].APAGQEEPGTPPSSPLSAEQLDR.[I]	1xPhospho [T/S]	Used	0	2414.09		90.5	69.7	213.9	64.1	149.9	83.3	130.2	98.3		Not Found	Peak Found	High	High	Peak Found	High	Peak Found	Peak Found	High
P13051	R.HAPSPEPAVQGTGVAGVPEESGDAAAIPAK.K	[20-49]	P13051 1xPhospho [S23]	[R].HAPSPEPAVQGTGVAGVPEESGDAAAIPAK.[K]	1xPhospho [S4]	Used	0	2890.36	41.9	68.6	95	140	130.2	108.6	106.5	99.3	109.8		High	Peak Found	High	High	High	Peak Found	Peak Found	High	High
P13051	R.HAPSPEPAVQGTGVAGVPEESGDAAAIPAKK.A	[20-50]	P13051 1xPhospho [S23]	[R].HAPSPEPAVQGTGVAGVPEESGDAAAIPAKK.[A]	1xPhospho [S4]	Used	1	3018.46	80.9	68.1	72.9	112	125.5	120	108.2	92.1	120.2		High	Peak Found	Peak Found	High	Peak Found	High	Peak Found	High	High
P13489	-.MSLDIQSLDIQCEELSDAR.W	[1-19]	P13489 1xPhospho [S2]; 1xMet-loss+Acetyl [N-Term]	[-].MSLDIQSLDIQCEELSDAR.[W]	1xCarbamidomethyl [C12]; 1xPhospho [S2]; 1xMet-loss+Acetyl [N-Term]	Used	0	2213.96				380	241	279					Not Found	Not Found	Not Found	High	Peak Found	High	Not Found	Not Found	Not Found
P13796	-.MARGSVSDEEMMELR.E	[1-15]	P13796 1xPhospho [S5]; 1xMet-loss+Acetyl [N-Term]	[-].MARGSVSDEEMMELR.[E]	1xPhospho [S5]; 1xOxidation [M]; 1xMet-loss+Acetyl [N-Term]	Used	1	1747.7							164.3	315.4	420.3		Not Found	Not Found	Not Found	Not Found	Not Found	Not Found	High	High	High
P13796	-.MARGSVSDEEMMELR.E	[1-15]	P13796 1xPhospho [S5]; 1xMet-loss+Acetyl [N-Term]	[-].MARGSVSDEEMMELR.[E]	1xPhospho [S5]; 1xMet-loss+Acetyl [N-Term]	Used	1	1731.71							149.1	361.5	389.4		Not Found	Not Found	Not Found	Not Found	Not Found	Not Found	High	High	High
P13796	R.GSVSDEEMMELR.E	[4-15]	P13796 1xPhospho [S5]	[R].GSVSDEEMMELR.[E]	1xPhospho [S2]; 2xOxidation [M8; M9]	Used	0	1494.55							273.8	238.3	387.9		Not Found	Not Found	Not Found	Not Found	Not Found	Not Found	High	High	High
P13796	R.GSVSDEEMMELR.E	[4-15]	P13796 1xPhospho [S5]	[R].GSVSDEEMMELR.[E]	1xPhospho [S2]; 1xOxidation [M]	Used	0	1478.55							244.9	319.9	335.1		Not Found	Not Found	Not Found	Not Found	Not Found	Not Found	High	High	High
P13796	R.GSVSDEEMMELR.E	[4-15]	P13796 1xPhospho [S5]	[R].GSVSDEEMMELR.[E]	1xPhospho [S2]	Used	0	1462.56							275.2	323.3	301.5		Not Found	Not Found	Not Found	Not Found	Not Found	Not Found	High	High	High
P13798	K.ALDVSASDDEIAR.L	[181-193]	P13798 1xPhospho [S187]	[K].ALDVSASDDEIAR.[L]	1xPhospho [S7]	Used	0	1441.62	88.8	118.9	95.6	74.4	87	76.5	133	109.4	116.5		High	High	High	Peak Found	High	High	High	High	High
P13807	R.HSSPHQSEDEEDPR.N	[651-664]	P13807 2xPhospho [S653; S657]; P13807-2 2xPhospho [S589; S593]	[R].HSSPHQSEDEEDPR.[N]	2xPhospho [S3; S7]	Used	0	1809.61	96.2			203.5	322.1	278.2					High	Not Found	Not Found	High	High	High	Not Found	Not Found	Not Found
P13807	R.HSSPHQSEDEEDPR.N	[651-664]	P13807 1xPhospho [S652]; P13807-2 1xPhospho [S588]	[R].HSSPHQSEDEEDPR.[N]	1xPhospho [S2]	Used	0	1729.64	50.8	40.5	61	125.3	271	351.3					Peak Found	Peak Found	Peak Found	Peak Found	Peak Found	High	Not Found	Not Found	Not Found
P13807	R.YPRPASVPPSPSLSR.H	[636-650]	P13807 1xPhospho [S645]; P13807-2 1xPhospho [S581]	[R].YPRPASVPPSPSLSR.[H]	1xPhospho [S10]	Used	0	1690.83	82.1		120.7	206.3	262.2	228.7					Peak Found	Not Found	Peak Found	Peak Found	High	High	Not Found	Not Found	Not Found
P13861	R.VADAKGDSESEEDEDLEVPVPSR.F	[71-93]	P13861-2 1xPhospho [S]; P13861 1xPhospho [S]	[R].VADAKGDSESEEDEDLEVPVPSR.[F]	1xPhospho [S]	Used	1	2553.09	34.9	100.3	107.9	83.9	109.6	98.9	192.3	91.6	80.5		High	High	High	High	High	High	High	High	High
P13861	R.RVSVCAETYNPDEEEEDTDPR.V	[97-117]	P13861-2 1xPhospho [S99]; P13861 1xPhospho [S99]	[R].RVSVCAETYNPDEEEEDTDPR.[V]	1xCarbamidomethyl [C5]; 1xPhospho [S3]	Used	1	2591.02	38.2	59.9	89.1	253.9	129.9	139.7	48.3	65.6	75.3		Peak Found	High	High	High	High	High	Peak Found	Peak Found	High
P13994	R.QDKPLSPAGSSQEAADTPDTR.H	[357-377]	P13994 1xPhospho [S366]	[R].QDKPLSPAGSSQEAADTPDTR.[H]	1xDeamidated [Q12]; 1xPhospho [S10]	Not Used	0	2251.97										No Quan Values	Not Found	High	Not Found	Not Found	Not Found	Not Found	Not Found	Not Found	Not Found
P14618	R.LDIDSPPITAR.N	[33-43]	P14618-2 1xPhospho [S37]; P14618 1xPhospho [S37]	[R].LDIDSPPITAR.[N]	1xPhospho [S5]	Used	0	1277.61	131.2	139	86.2	85.5	101.2	86.5	109.5	92.4	68.4		High	High	High	High	High	High	High	High	Peak Found
P14859-1	K.RINPPSSGGTSSSPIK.A	[436-451]	P14859-3 1xPhospho [S]; P14859-1 1xPhospho [S]; P14859-6 1xPhospho [S]; P14859-2 1xPhospho [S]; P14859-5 1xPhospho [S]; P14859-4 1xPhospho [S]	[K].RINPPSSGGTSSSPIK.[A]	1xPhospho [S]	Used	1	1664.8	92.9	92.4	77.2	99.5	130.5	116	82.2	98.3	111.1		Peak Found	Peak Found	Peak Found	Peak Found	High	Peak Found	High	High	High
P14859-1	R.INPPSSGGTSSSPIK.A	[437-451]	P14859-3 1xPhospho [S/T]; P14859-1 1xPhospho [S/T]; P14859-6 1xPhospho [S/T]; P14859-2 1xPhospho [S/T]; P14859-5 1xPhospho [S/T]; P14859-4 1xPhospho [S/T]	[R].INPPSSGGTSSSPIK.[A]	1xPhospho [S/T]	Used	0	1508.7	85.3	92.8	72.5	114.2	104.3	122.5	107.3	111.2	89.8		High	Peak Found	Peak Found	High	Peak Found	High	High	Peak Found	High
P14923	R.ALMGSPQLVAAVVR.T	[178-191]	P14923 1xPhospho [S182]	[R].ALMGSPQLVAAVVR.[T]	1xPhospho [S5]	Used	0	1491.78	21.7	47.8	36.2	368.5	243.8	182.1					Peak Found	Peak Found	Peak Found	High	High	Peak Found	Not Found	Not Found	Not Found
P14923	R.KRVSVELTNSLFK.H	[662-674]	P14923 1xPhospho [S665]	[R].KRVSVELTNSLFK.[H]	1xPhospho [S4]	Used	2	1600.85		36.8	25.3	291.4	352.7	193.6					Not Found	Peak Found	Peak Found	High	High	Peak Found	Not Found	Not Found	Not Found
P15056	K.ALQKSPGPQR.E	[415-424]	P15056 1xPhospho [S419]	[K].ALQKSPGPQR.[E]	1xPhospho [S5]	Used	1	1161.58	41.1	58.2	59	55.1	60.1	69.6	135.6	217.9	203.3		Peak Found	Peak Found	High	Peak Found	Peak Found	Peak Found	High	High	High
P15056	R.SASEPSLNR.A	[727-735]	P15056 1xPhospho [S729]	[R].SASEPSLNR.[A]	1xPhospho [S3]	Used	0	1040.44	85.1	110.6	98.1	101.6	95.5	116	80.2	114.1	98.9		High	High	High	High	High	High	High	High	High
P15056	R.RDSSDDWEIPDGQITVGQR.I	[444-462]	P15056 1xPhospho [S]	[R].RDSSDDWEIPDGQITVGQR.[I]	1xPhospho [S]	Used	1	2253.98	138.9	152.2	69.6	112	110.5	80.8	82.9	79.3	73.8		High	High	High	High	High	Peak Found	High	High	Peak Found
P15056	R.SNPKSPQKPIVR.V	[147-158]	P15056 1xPhospho [S]	[R].SNPKSPQKPIVR.[V]	1xPhospho [S]	Used	1	1430.75	103.7	83.3	101.7	61.8	95.3	82.4	95.4	134	142.3		High	High	High	High	High	Peak Found	High	High	High
P15056	R.SSSAPNVHINTIEPVNIDDLIR.D	[363-384]	P15056 1xPhospho [S/T]	[R].SSSAPNVHINTIEPVNIDDLIR.[D]	1xPhospho [S/T]	Used	0	2484.21	100.7	171.5	95.6	125.2	94.4	95.3	25	101.1	91.3		Peak Found	High	High	High	Peak Found	High	Peak Found	Peak Found	Peak Found
P15408-1	R.SPPAPGLQPMR.S	[200-210]	P15408-1 1xPhospho [S200]; P15408-2 1xPhospho [S192]; P15408-3 1xPhospho [S161]	[R].SPPAPGLQPMR.[S]	1xPhospho [S1]	Used	0	1230.57		75.3	89.3	147.5	133.3	75.3	140.8	108.8	129.8		Not Found	Peak Found	Peak Found	High	High	Peak Found	Peak Found	Peak Found	Peak Found
P15529-2	K.ADGGAEYATYQTK.S	[378-390]	P15529-6 1xPhospho [T357]; P15529-3 1xPhospho [T371]; P15529-7 1xPhospho [T342]; P15529-16 1xPhospho [T323]; P15529-4 1xPhospho [T356]; P15529-2 1xPhospho [T386]; P15529-5 1xPhospho [T372]	[K].ADGGAEYATYQTK.[S]	1xPhospho [T9]	Used	0	1454.58		90.4	65.4	22	39	38.6	143.5	270.2	230.9		Not Found	Peak Found	Peak Found	Peak Found	Peak Found	Peak Found	Peak Found	High	High
P15531; P22392	R.VMLGETNPADSKPGTIR.G	[89-105]	P22392-2 1xPhospho [T94]; 1xPhospho [T209]; P15531 1xPhospho [T94]; O60361 1xPhospho [T79]; P22392 1xPhospho [T94]; P15531-2 1xPhospho [T119]	[R].VMLGETNPADSKPGTIR.[G]	1xPhospho [T6]; 1xOxidation [M2]	Not Used	0	1881.88	125.1	107.5	107.7	77.6	98.4	104.5	89	88.1	102	Shared	Peak Found	Peak Found	High	Peak Found	Peak Found	Peak Found	Peak Found	Peak Found	Peak Found
P15531; P22392	R.VMLGETNPADSKPGTIR.G	[89-105]	P22392-2 1xPhospho [T94]; 1xPhospho [T209]; P15531 1xPhospho [T94]; O60361 1xPhospho [T79]; P22392 1xPhospho [T94]; P15531-2 1xPhospho [T119]	[R].VMLGETNPADSKPGTIR.[G]	1xPhospho [T6]; 1xOxidation [M2]	Not Used	0	1881.88	125.1	107.5	107.7	77.6	98.4	104.5	89	88.1	102	Shared	Peak Found	Peak Found	High	Peak Found	Peak Found	Peak Found	Peak Found	Peak Found	Peak Found
P15923-2	R.AGAPGALSPSYDGGLHGLQSK.I	[372-392]	P15923 1xPhospho [S379]; P15923-3 1xPhospho [S328]; P15923-2 1xPhospho [S379]	[R].AGAPGALSPSYDGGLHGLQSK.[I]	1xPhospho [S8]	Used	0	2062.96	40.6	78.6	62.8	43.7	32.1	26.7	193.3	216.6	205.7		Peak Found	High	High	Peak Found	Peak Found	Peak Found	High	High	High
P15923-2	R.TSSTDEVLSLEEK.D	[528-540]	P15923-2 1xPhospho [S530]	[R].TSSTDEVLSLEEK.[D]	1xPhospho [S3]	Used	0	1517.66	72.8	115.9	59.4	77.6	31.9	41.3	173	191.3	136.7		Peak Found	Peak Found	Peak Found	Peak Found	Peak Found	Peak Found	High	High	Peak Found
P15924-1	K.GLPSPYNMSSAPGSR.S	[2812-2826]	P15924-1 1xPhospho [Y2817]; P15924-3 1xPhospho [Y2374]; P15924-2 1xPhospho [Y2218]	[K].GLPSPYNMSSAPGSR.[S]	1xPhospho [Y6]; 1xOxidation [M8]	Used	0	1616.68		177.7	138.4				176.8	177.3	229.8		Not Found	High	Peak Found	Not Found	Not Found	Not Found	High	Peak Found	Peak Found
P15924-1	R.SMSFQGIR.Q	[2207-2214]	P15924-1 1xPhospho [S2209]; P15924-3 1xPhospho [S1766]; P15924-2 1xPhospho [S1610]	[R].SMSFQGIR.[Q]	1xPhospho [S3]	Used	0	1005.42	104.2	320.7	171.7	44	16.9		19.7	127.9	94.9		High	High	High	Peak Found	Peak Found	Not Found	Peak Found	High	High
P15924-1	R.AESGPDLR.Y	[20-27]	P15924-1 1xPhospho [S22]; P15924-3 1xPhospho [S22]; P15924-2 1xPhospho [S22]	[R].AESGPDLR.[Y]	1xPhospho [S3]	Used	0	924.382	51.7	50.6		160.6	181.6	178.6	63.9	116.1	96.9		Peak Found	Peak Found	Not Found	High	High	High	Peak Found	Peak Found	Peak Found
P15924-1	K.GLPSPYNMSSAPGSR.S	[2812-2826]	P15924-1 1xPhospho [Y/S]; P15924-3 1xPhospho [Y/S]; P15924-2 1xPhospho [Y/S]	[K].GLPSPYNMSSAPGSR.[S]	1xPhospho [S/Y]	Used	0	1600.68		130.3	162.2	46.8	38.7		192.1	150	179.9		Not Found	Peak Found	High	Peak Found	Peak Found	Not Found	High	High	High
P15924-1	K.GGGGYTCQSGSGWDEFTK.H	[168-185]	P15924-1 1xPhospho [S/T]; P15924-3 1xPhospho [S/T]; P15924-2 1xPhospho [S/T]	[K].GGGGYTCQSGSGWDEFTK.[H]	1xCarbamidomethyl [C7]; 1xPhospho [S/T]	Used	0	1973.74	151.5	165.1	51.1	162.9	138.7	117.6		60.6	52.6		High	High	High	High	Peak Found	High	Not Found	Peak Found	High
P15924-1	R.ASSKGGGGYTCQSGSGWDEFTK.H	[164-185]	P15924-1 1xPhospho [S]; P15924-3 1xPhospho [S]; P15924-2 1xPhospho [S]	[R].ASSKGGGGYTCQSGSGWDEFTK.[H]	1xCarbamidomethyl [C11]; 1xPhospho [S]	Used	1	2346.93	146.3	142.2	83.1	42.4	50.1	47.5	91.9	146.6	149.8		Peak Found	High	High	Peak Found	Peak Found	Peak Found	Peak Found	High	Peak Found
P16070	K.SQEMVHLVNK.E	[706-715]	P16070-12 1xPhospho [S325]; P16070-5 1xPhospho [S698]; P16070-7 1xPhospho [S677]; P16070-8 1xPhospho [S638]; P16070-3 1xPhospho [S675]; P16070-13 1xPhospho [S389]; P16070-11 1xPhospho [S393]; P16070-6 1xPhospho [S663]; P16070-18 1xPhospho [S304]; P16070 1xPhospho [S706]; P16070-17 1xPhospho [S655]; P16070-10 1xPhospho [S457]; P16070-14 1xPhospho [S360]; P16070-4 1xPhospho [S663]; P16070-16 1xPhos…	[K].SQEMVHLVNK.[E]	1xPhospho [S1]; 1xOxidation [M4]	Used	0	1280.57	124.4	134.7	53.6	230.7	174.1	140.1		42.3			Peak Found	Peak Found	Peak Found	High	High	High	Not Found	Peak Found	Not Found
P16070	K.SQEMVHLVNK.E	[706-715]	P16070-12 1xPhospho [S325]; P16070-5 1xPhospho [S698]; P16070-7 1xPhospho [S677]; P16070-8 1xPhospho [S638]; P16070-3 1xPhospho [S675]; P16070-13 1xPhospho [S389]; P16070-11 1xPhospho [S393]; P16070-6 1xPhospho [S663]; P16070-18 1xPhospho [S304]; P16070 1xPhospho [S706]; P16070-17 1xPhospho [S655]; P16070-10 1xPhospho [S457]; P16070-14 1xPhospho [S360]; P16070-4 1xPhospho [S663]; P16070-16 1xPhos…	[K].SQEMVHLVNK.[E]	1xPhospho [S1]	Used	0	1264.58	99.5	115.8	74.8	324.1	193.5	92.3					Peak Found	High	High	High	High	High	Not Found	Not Found	Not Found
P16070	R.KPSGLNGEASKSQEMVHLVNK.E	[695-715]	P16070-12 1xPhospho [S]; P16070-5 1xPhospho [S]; P16070-7 1xPhospho [S]; P16070-8 1xPhospho [S]; P16070-3 1xPhospho [S]; P16070-13 1xPhospho [S]; P16070-11 1xPhospho [S]; P16070-6 1xPhospho [S]; P16070-18 1xPhospho [S]; P16070 1xPhospho [S]; P16070-17 1xPhospho [S]; P16070-10 1xPhospho [S]; P16070-14 1xPhospho [S]; P16070-4 1xPhospho [S]; P16070-16 1xPhospho [S]	[R].KPSGLNGEASKSQEMVHLVNK.[E]	1xPhospho [S]; 1xOxidation [M15]	Used	1	2349.13	17.6	78	95.4	247.6	217.8	243.6					Peak Found	High	Peak Found	High	Peak Found	High	Not Found	Not Found	Not Found
P16070	R.KPSGLNGEASKSQEMVHLVNK.E	[695-715]	P16070-12 1xPhospho [S]; P16070-5 1xPhospho [S]; P16070-7 1xPhospho [S]; P16070-8 1xPhospho [S]; P16070-3 1xPhospho [S]; P16070-13 1xPhospho [S]; P16070-11 1xPhospho [S]; P16070-6 1xPhospho [S]; P16070-18 1xPhospho [S]; P16070 1xPhospho [S]; P16070-17 1xPhospho [S]; P16070-10 1xPhospho [S]; P16070-14 1xPhospho [S]; P16070-4 1xPhospho [S]; P16070-16 1xPhospho [S]	[R].KPSGLNGEASKSQEMVHLVNK.[E]	1xPhospho [S]	Used	1	2333.13	124.1	66.5	126.9	171.9	324.7	85.9					High	Peak Found	High	High	High	High	Not Found	Not Found	Not Found
P16070	R.KPSGLNGEASK.S	[695-705]	P16070-12 1xPhospho [S316]; P16070-5 1xPhospho [S689]; P16070-7 1xPhospho [S668]; P16070-8 1xPhospho [S629]; P16070-3 1xPhospho [S666]; P16070-13 1xPhospho [S380]; P16070-11 1xPhospho [S384]; P16070-6 1xPhospho [S654]; P16070-18 1xPhospho [S295]; P16070 1xPhospho [S697]; P16070-17 1xPhospho [S646]; P16070-10 1xPhospho [S448]; P16070-14 1xPhospho [S351]; P16070-4 1xPhospho [S654]; P16070-16 1xPhos…	[R].KPSGLNGEASK.[S]	1xDeamidated [N6]; 1xPhospho [S3]	Used	0	1168.52	257.6	334.3	226.3	38.7		43.1					High	High	High	Peak Found	Not Found	Peak Found	Not Found	Not Found	Not Found
P16070	R.KPSGLNGEASKSQEMVHLVNK.E	[695-715]	P16070-12 1xPhospho [S]; P16070-5 1xPhospho [S]; P16070-7 1xPhospho [S]; P16070-8 1xPhospho [S]; P16070-3 1xPhospho [S]; P16070-13 1xPhospho [S]; P16070-11 1xPhospho [S]; P16070-6 1xPhospho [S]; P16070-18 1xPhospho [S]; P16070 1xPhospho [S]; P16070-17 1xPhospho [S]; P16070-10 1xPhospho [S]; P16070-14 1xPhospho [S]; P16070-4 1xPhospho [S]; P16070-16 1xPhospho [S]	[R].KPSGLNGEASKSQEMVHLVNK.[E]	1xDeamidated [N/Q]; 1xPhospho [S]; 1xOxidation [M15]	Used	1	2350.11	99.6	60	94.1	168.5	272.3	169.2	16.3	11.3	8.6		High	Peak Found	High	High	High	High	Peak Found	Peak Found	Peak Found
P16070	R.KPSGLNGEASKSQEMVHLVNK.E	[695-715]	P16070-12 1xPhospho [S]; P16070-5 1xPhospho [S]; P16070-7 1xPhospho [S]; P16070-8 1xPhospho [S]; P16070-3 1xPhospho [S]; P16070-13 1xPhospho [S]; P16070-11 1xPhospho [S]; P16070-6 1xPhospho [S]; P16070-18 1xPhospho [S]; P16070 1xPhospho [S]; P16070-17 1xPhospho [S]; P16070-10 1xPhospho [S]; P16070-14 1xPhospho [S]; P16070-4 1xPhospho [S]; P16070-16 1xPhospho [S]	[R].KPSGLNGEASKSQEMVHLVNK.[E]	1xDeamidated [N/Q]; 1xPhospho [S]	Used	1	2334.12	141.6	59.9	133.2	137.4	283.1	116.5	11	6.3	11.2		High	High	High	High	High	High	Peak Found	Peak Found	Peak Found
P16144-3	R.LTAGVPDTPTR.L	[1506-1516]	P16144-2 1xPhospho [T1460]; P16144-4 1xPhospho [T1460]; P16144-3 1xPhospho [T1513]; P16144-1 1xPhospho [T1530]	[R].LTAGVPDTPTR.[L]	1xPhospho [T8]	Used	0	1207.57	73.2	69.9	49.2	128.7	118.6	127.4	120.3	118.4	94.3		High	Peak Found	Peak Found	Peak Found	High	Peak Found	Peak Found	Peak Found	Peak Found
P16144-3	R.SPSGSQRPSVSDDTEHLVNGR.M	[1356-1376]	P16144-2 1xPhospho [S]; P16144-4 1xPhospho [S]; P16144-3 1xPhospho [S]	[R].SPSGSQRPSVSDDTEHLVNGR.[M]	1xPhospho [S]	Used	0	2305.02	155.2	64	79	105.3	116.1	78.1	32.8	110.9	158.7		Peak Found	Peak Found	Peak Found	High	Peak Found	High	Peak Found	High	High
P16333-1	K.RKPSVPDSASPADDSFVDPGER.L	[82-103]	P16333-1 1xPhospho [S85]; P16333-2 1xPhospho [S21]	[K].RKPSVPDSASPADDSFVDPGER.[L]	1xPhospho [S4]	Used	1	2409.07	142.3	120.7	138.4	57.9	102.2	72.9	52.8	80.5	132.4		High	High	High	High	Peak Found	Peak Found	Peak Found	Peak Found	Peak Found
P16383-1	K.RESEDDPESEPDDHEKR.I	[172-188]	P16383-1 2xPhospho [S174; S180]; P16383-3 2xPhospho [S174; S180]; P16383-4 2xPhospho [S174; S180]	[K].RESEDDPESEPDDHEKR.[I]	2xPhospho [S3; S9]	Used	2	2229.8	93.7	79.2	80.5		108.2	70.3	148.7	163.5	155.8		Peak Found	Peak Found	Peak Found	Not Found	Peak Found	Peak Found	High	High	Peak Found
P16383-1	R.ESEDDPESEPDDHEK.R	[173-187]	P16383-1 1xPhospho [S180]; P16383-3 1xPhospho [S180]; P16383-4 1xPhospho [S180]	[R].ESEDDPESEPDDHEK.[R]	1xPhospho [S8]	Used	0	1837.63	69	108.1	83.2	60.4	90.2	73.1	148.3	141.5	126.3		Peak Found	Peak Found	Peak Found	Peak Found	Peak Found	Peak Found	Peak Found	High	Peak Found
P16401	-.MSETAPAETATPAPVEK.S	[1-17]	P16401 1xPhospho [S2]; 1xMet-loss+Acetyl [N-Term]	[-].MSETAPAETATPAPVEK.[S]	1xPhospho [S2]; 1xMet-loss+Acetyl [N-Term]	Used	0	1720.77				373.2			123.7	235.2	167.8		Not Found	Not Found	Not Found	High	Not Found	Not Found	High	High	High
P16401	-.MSETAPAETATPAPVEKSPAK.K	[1-21]	P16401 1xPhospho [S18]; 1xMet-loss+Acetyl [N-Term]	[-].MSETAPAETATPAPVEKSPAK.[K]	1xPhospho [S18]; 1xMet-loss+Acetyl [N-Term]	Used	1	2103.98		0.5	0.7	169.5	21.9	23.7	174	291.8	218		Not Found	Peak Found	Peak Found	High	Peak Found	Peak Found	High	High	High
P16401	-.MSETAPAETATPAPVEKSPAKK.K	[1-22]	P16401 1xPhospho [S18]; 1xMet-loss+Acetyl [N-Term]	[-].MSETAPAETATPAPVEKSPAKK.[K]	1xPhospho [S18]; 1xMet-loss+Acetyl [N-Term]	Used	2	2232.08				199.1	12.3	15.5	145.8	302.6	224.8		Not Found	Not Found	Not Found	High	Peak Found	Peak Found	High	High	High
P16401; P16402; P10412; P16403	K.GTGASGSFKLNK.K	[99-110]	P16401 1xPhospho [S]; P16402 1xPhospho [S]; P10412 1xPhospho [S]; P16403 1xPhospho [S]; Q02539 1xPhospho [S]	[K].GTGASGSFKLNK.[K]	1xPhospho [S]	Not Used	1	1246.58	16	64.3	80.9	58.2	10.7	92.5	84.8	230.7	261.9	Shared	Peak Found	High	High	High	Peak Found	High	High	High	High
P16401; P16402; P10412; P16403	K.GTGASGSFKLNKK.A	[99-111]	P16401 1xPhospho [S]; P16402 1xPhospho [S]; P10412 1xPhospho [S]; P16403 1xPhospho [S]; Q02539 1xPhospho [S]	[K].GTGASGSFKLNKK.[A]	1xPhospho [S]	Not Used	2	1374.68		53.5	87.4	55.6	78.1	79.3	50.8	188.5	306.9	Shared	Not Found	High	High	High	High	High	High	High	High
P16401; P16402; P10412; P16403	K.GTGASGSFKLNK.K	[98-109]	P16401 1xPhospho [S]; P16402 1xPhospho [S]; P10412 1xPhospho [S]; P16403 1xPhospho [S]; Q02539 1xPhospho [S]	[K].GTGASGSFKLNK.[K]	1xPhospho [S]	Not Used	1	1246.58	16	64.3	80.9	58.2	10.7	92.5	84.8	230.7	261.9	Shared	Peak Found	High	High	High	Peak Found	High	High	High	High
P16401; P16402; P10412; P16403	K.GTGASGSFKLNKK.A	[98-110]	P16401 1xPhospho [S]; P16402 1xPhospho [S]; P10412 1xPhospho [S]; P16403 1xPhospho [S]; Q02539 1xPhospho [S]	[K].GTGASGSFKLNKK.[A]	1xPhospho [S]	Not Used	2	1374.68		53.5	87.4	55.6	78.1	79.3	50.8	188.5	306.9	Shared	Not Found	High	High	High	High	High	High	High	High
P16401; P16402; P10412; P16403	K.GTGASGSFKLNK.K	[98-109]	P16401 1xPhospho [S]; P16402 1xPhospho [S]; P10412 1xPhospho [S]; P16403 1xPhospho [S]; Q02539 1xPhospho [S]	[K].GTGASGSFKLNK.[K]	1xPhospho [S]	Not Used	1	1246.58	16	64.3	80.9	58.2	10.7	92.5	84.8	230.7	261.9	Shared	Peak Found	High	High	High	Peak Found	High	High	High	High
P16401; P16402; P10412; P16403	K.GTGASGSFKLNKK.A	[98-110]	P16401 1xPhospho [S]; P16402 1xPhospho [S]; P10412 1xPhospho [S]; P16403 1xPhospho [S]; Q02539 1xPhospho [S]	[K].GTGASGSFKLNKK.[A]	1xPhospho [S]	Not Used	2	1374.68		53.5	87.4	55.6	78.1	79.3	50.8	188.5	306.9	Shared	Not Found	High	High	High	High	High	High	High	High
P16401; P16402; P10412; P16403	K.GTGASGSFKLNK.K	[101-112]	P16401 1xPhospho [S]; P16402 1xPhospho [S]; P10412 1xPhospho [S]; P16403 1xPhospho [S]; Q02539 1xPhospho [S]	[K].GTGASGSFKLNK.[K]	1xPhospho [S]	Not Used	1	1246.58	16	64.3	80.9	58.2	10.7	92.5	84.8	230.7	261.9	Shared	Peak Found	High	High	High	Peak Found	High	High	High	High
P16401; P16402; P10412; P16403	K.GTGASGSFKLNKK.A	[101-113]	P16401 1xPhospho [S]; P16402 1xPhospho [S]; P10412 1xPhospho [S]; P16403 1xPhospho [S]; Q02539 1xPhospho [S]	[K].GTGASGSFKLNKK.[A]	1xPhospho [S]	Not Used	2	1374.68		53.5	87.4	55.6	78.1	79.3	50.8	188.5	306.9	Shared	Not Found	High	High	High	High	High	High	High	High
P16402	-.MSETAPLAPTIPAPAEK.T	[1-17]	P16402 1xPhospho [S/T]; 1xMet-loss+Acetyl [N-Term]	[-].MSETAPLAPTIPAPAEK.[T]	1xPhospho [S/T]; 1xMet-loss+Acetyl [N-Term]	Used	0	1714.83				344.9	87.4	121.5	91.9	138.8	115.5		Not Found	Not Found	Not Found	High	High	High	High	High	High
P16402	-.MSETAPLAPTIPAPAEKTPVK.K	[1-21]	P16402 1xPhospho [S/T]; 1xMet-loss+Acetyl [N-Term]	[-].MSETAPLAPTIPAPAEKTPVK.[K]	1xPhospho [S/T]; 1xMet-loss+Acetyl [N-Term]	Used	1	2140.09				146.3	105.3	107.3	106.4	272.9	161.8		Not Found	Not Found	Not Found	High	High	High	High	High	High
P16402; P10412	K.RKASGPPVSELITK.A	[34-47]	P16402 1xPhospho [S37]; P10412 1xPhospho [S36]	[K].RKASGPPVSELITK.[A]	1xPhospho [S4]	Not Used	2	1562.83	134.4	143.4	196.1	44.7	73.8	52.8	47.2	88.5	119.2	Shared	High	High	High	High	Peak Found	High	High	High	High
P16402; P10412	K.RKASGPPVSELITK.A	[33-46]	P16402 1xPhospho [S37]; P10412 1xPhospho [S36]	[K].RKASGPPVSELITK.[A]	1xPhospho [S4]	Not Used	2	1562.83	134.4	143.4	196.1	44.7	73.8	52.8	47.2	88.5	119.2	Shared	High	High	High	High	Peak Found	High	High	High	High
P16402; P10412; P16403	R.KASGPPVSELITK.A	[35-47]	P16402 1xPhospho [S37]; P10412 1xPhospho [S36]; P16403 1xPhospho [S36]	[R].KASGPPVSELITK.[A]	1xPhospho [S3]	Not Used	1	1406.73	88	249.6	194.9	47.6	36.4	41.8	67.3	88.3	85.9	Shared	High	High	High	High	High	High	High	High	High
P16402; P10412; P16403	R.KASGPPVSELITK.A	[34-46]	P16402 1xPhospho [S37]; P10412 1xPhospho [S36]; P16403 1xPhospho [S36]	[R].KASGPPVSELITK.[A]	1xPhospho [S3]	Not Used	1	1406.73	88	249.6	194.9	47.6	36.4	41.8	67.3	88.3	85.9	Shared	High	High	High	High	High	High	High	High	High
P16402; P10412; P16403	R.KASGPPVSELITK.A	[34-46]	P16402 1xPhospho [S37]; P10412 1xPhospho [S36]; P16403 1xPhospho [S36]	[R].KASGPPVSELITK.[A]	1xPhospho [S3]	Not Used	1	1406.73	88	249.6	194.9	47.6	36.4	41.8	67.3	88.3	85.9	Shared	High	High	High	High	High	High	High	High	High
P16403	-.MSETAPAAPAAAPPAEKAPVK.K	[1-21]	P16403 1xPhospho [T4]; 1xMet-loss+Acetyl [N-Term]	[-].MSETAPAAPAAAPPAEKAPVK.[K]	1xPhospho [T4]; 1xMet-loss+Acetyl [N-Term]	Not Used	1	1995.98										No Quan Values	Not Found	High	Not Found	Not Found	Not Found	Not Found	Not Found	Not Found	Not Found
P16403	-.MSETAPAAPAAAPPAEK.A	[1-17]	P16403 1xPhospho [S2]; 1xMet-loss+Acetyl [N-Term]	[-].MSETAPAAPAAAPPAEK.[A]	1xPhospho [S2]; 1xMet-loss+Acetyl [N-Term]	Used	0	1600.73	70.6	114.7	106.2	162.6	150	116.2	51.6	81.8	46.3		High	High	High	High	High	Peak Found	High	Peak Found	High
P16455	K.GAGATSGSPPAGRN.-	[194-207]	P16455 1xPhospho [S201]	[K].GAGATSGSPPAGRN.[-]	1xPhospho [S8]	Used	1	1279.54	32.8	55.6	33.2	274.6	215.8	287.9					Peak Found	High	Peak Found	Peak Found	Peak Found	High	Not Found	Not Found	Not Found
P16455	K.GAGATSGSPPAGR.N	[194-206]	P16455 1xPhospho [S201]	[K].GAGATSGSPPAGR.[N]	1xPhospho [S8]	Used	0	1165.5	58.9	65.9	32.6	287.4	222.5	232.7					Peak Found	Peak Found	Peak Found	High	Peak Found	Peak Found	Not Found	Not Found	Not Found
P16949-1	K.RASGQAFELILSPR.S	[14-27]	P16949-2 2xPhospho [S16; S25]; P16949-1 2xPhospho [S16; S25]	[K].RASGQAFELILSPR.[S]	2xPhospho [S3; S12]	Used	1	1704.79	112.9	176.2	74.1	64.5	45	26.6	272.3	65.8	62.7		High	High	Peak Found	Peak Found	Peak Found	Peak Found	High	High	Peak Found
P16949-1	K.ESVPEFPLSPPK.K	[30-41]	P16949-2 1xPhospho [S38]; P16949-1 1xPhospho [S38]	[K].ESVPEFPLSPPK.[K]	1xPhospho [S9]	Used	0	1406.66	110.6	94.4	58.4	47.2	28.9	32	187.3	210.6	130.6		High	High	High	High	High	High	High	High	High
P16949-1	K.ESVPEFPLSPPKKK.D	[30-43]	P16949-2 1xPhospho [S38]; P16949-1 1xPhospho [S38]	[K].ESVPEFPLSPPKKK.[D]	1xPhospho [S9]	Used	2	1662.85	8.4	99	92.3	31.4	42.7	32.6	181.4	204.4	207.8		Peak Found	High	High	Peak Found	High	Peak Found	High	High	High
P16949-1	R.RKSHEAEVLK.Q	[61-70]	P16949-2 1xPhospho [S63]; P16949-1 1xPhospho [S63]	[R].RKSHEAEVLK.[Q]	1xPhospho [S3]	Used	2	1276.64	246.8	58.8	103.8	48.5	86.8	45.8	21.9	132.3	155.3		High	High	High	High	High	High	Peak Found	High	High
P16949-1	K.DLSLEEIQK.K	[44-52]	P16949-2 1xPhospho [S46]; P16949-1 1xPhospho [S46]; Q93045-2 1xPhospho [S80]; Q93045 1xPhospho [S80]	[K].DLSLEEIQK.[K]	1xPhospho [S3]	Used	0	1154.53	121.2	148.5	105.9	79.6	56.6	72.1	124.2	104.2	87.8		Peak Found	Peak Found	High	Peak Found	Peak Found	Peak Found	Peak Found	Peak Found	Peak Found
P16949-1	R.SKESVPEFPLSPPK.K	[28-41]	P16949-2 1xPhospho [S38]; P16949-1 1xPhospho [S38]	[R].SKESVPEFPLSPPK.[K]	1xPhospho [S11]	Used	1	1621.79	111.3	99.7	65	40.6	33.1	28.4	190.3	195.3	136.4		High	High	High	High	High	High	High	High	High
P16949-1	R.SKESVPEFPLSPPKK.K	[28-42]	P16949-2 1xPhospho [S38]; P16949-1 1xPhospho [S38]	[R].SKESVPEFPLSPPKK.[K]	1xPhospho [S11]	Used	2	1749.88	126.9	107.2	77		36.2	39	174.7	174.4	164.6		Peak Found	Peak Found	High	Not Found	Peak Found	Peak Found	Peak Found	Peak Found	High
P16949-1	K.SHEAEVLK.Q	[63-70]	P16949-2 1xPhospho [S63]; P16949-1 1xPhospho [S63]	[K].SHEAEVLK.[Q]	1xPhospho [S1]	Used	0	992.445		164.1	91.8	82.1	61.6	65.7	163.2	170.5	101.1		Not Found	High	Peak Found	Peak Found	Peak Found	Peak Found	Peak Found	High	Peak Found
P16949-1	K.RASGQAFELILSPR.S	[14-27]	P16949-2 1xPhospho [S]; P16949-1 1xPhospho [S]	[K].RASGQAFELILSPR.[S]	1xPhospho [S]	Used	1	1624.82	81.1	164	110.2	46.9	51.2	35.8	124.5	155.1	131.3		High	High	High	High	High	High	High	High	High
P16949-1	R.ASGQAFELILSPR.S	[15-27]	P16949-2 1xPhospho [S]; P16949-1 1xPhospho [S]	[R].ASGQAFELILSPR.[S]	1xPhospho [S]	Used	0	1468.72	132.5	174.8	122.8	34.3	18.1	21.1	122.3	148.7	125.5		High	High	High	High	High	High	High	High	High
P16989-1	R.NYAGEEEEEGSGSSEGFDPPATDR.Q	[191-214]	P16989-3 1xPhospho [S203]; P16989-1 1xPhospho [S203]	[R].NYAGEEEEEGSGSSEGFDPPATDR.[Q]	1xPhospho [S13]	Used	0	2609.98		97	125.8	103.2	93.5	95.4	136.3	137.1	111.6		Not Found	High	High	Peak Found	Peak Found	Peak Found	High	High	Peak Found
P16989-1; P67809	R.SVGDGETVEFDVVEGEK.G	[134-150]	P16989-3 1xPhospho [S134]; P16989-1 1xPhospho [S134]; P16989-2 1xPhospho [S134]; Q9Y2T7 1xPhospho [S137]; P67809 1xPhospho [S102]	[R].SVGDGETVEFDVVEGEK.[G]	1xPhospho [S1]	Not Used	0	1875.79		204.2	110.5	122.6			104.2	196.7	161.9	Shared	Not Found	High	Peak Found	Peak Found	Not Found	Not Found	High	High	High
P16989-1; P67809	R.SVGDGETVEFDVVEGEK.G	[102-118]	P16989-3 1xPhospho [S134]; P16989-1 1xPhospho [S134]; P16989-2 1xPhospho [S134]; Q9Y2T7 1xPhospho [S137]; P67809 1xPhospho [S102]	[R].SVGDGETVEFDVVEGEK.[G]	1xPhospho [S1]	Not Used	0	1875.79		204.2	110.5	122.6			104.2	196.7	161.9	Shared	Not Found	High	Peak Found	Peak Found	Not Found	Not Found	High	High	High
P17026	R.SLDDKPYK.C	[49-56]	P17026 1xPhospho [S49]	[R].SLDDKPYK.[C]	1xPhospho [S1]	Used	0	1045.46	36.2	20.7	46	183.8	151.1	169.2	80	113.8	99.1		Peak Found	Peak Found	High	High	Peak Found	High	Peak Found	High	Peak Found
P17029	R.EATGLSPQAAQEKDGIVIVK.V	[8-27]	P17029 1xPhospho [T10]	[R].EATGLSPQAAQEKDGIVIVK.[V]	1xPhospho [T3]	Used	1	2134.08	75.6	114.6	107.5	102.8	81	95.2	110.6	103.2	109.6		Peak Found	High	High	Peak Found	Peak Found	Peak Found	Peak Found	Peak Found	Peak Found
P17029	R.EATGLSPQAAQEK.D	[8-20]	P17029 1xPhospho [S/T]	[R].EATGLSPQAAQEK.[D]	1xPhospho [S/T]	Used	0	1409.63	92	111.5	82	108	84.7	99	123.5	111.8	87.6		Peak Found	High	High	Peak Found	High	High	High	High	High
P17096-1	R.KQPPVSPGTALVGSQK.E	[31-46]	P17096-1 1xPhospho [T/S]; P17096-3 1xPhospho [T/S]	[R].KQPPVSPGTALVGSQK.[E]	1xPhospho [T/S]	Used	1	1673.86	215.9	192.1	70.2	58.2	45	71.9	129.9	65.8	51		High	Peak Found	Peak Found	Peak Found	Peak Found	Peak Found	Peak Found	Peak Found	Peak Found
P17096-1	R.KQPPVSPGTALVGSQKEPSEVPTPK.R	[31-55]	P17096-1 1xPhospho [S/T]; P17096-3 1xPhospho [S/T]	[R].KQPPVSPGTALVGSQKEPSEVPTPK.[R]	1xPhospho [S/T]	Used	2	2638.35	107.3	133.3	125.6	74.9	79.6	69.1	67.3	103.6	139.3		High	High	High	High	High	High	High	High	High
P17275	R.SRDATPPVSPINMEDQER.I	[251-268]	P17275 2xPhospho [T255; S259]	[R].SRDATPPVSPINMEDQER.[I]	2xPhospho [T5; S9]	Used	1	2201.89		242.6	310				130.1	85.1	132.2		Not Found	High	High	Not Found	Not Found	Not Found	Peak Found	Peak Found	Peak Found
P17480-1	R.GKLPESPK.R	[479-486]	P17480-2 1xPhospho [S447]; P17480-1 1xPhospho [S484]	[R].GKLPESPK.[R]	1xPhospho [S6]	Used	1	935.46	115	99.9	73.7	87.8	82.5	74.7	123.6	135.7	107.1		Peak Found	High	High	High	Peak Found	High	High	High	High
P17480-1	K.QATSPASKKPAQEGGK.G	[386-401]	P17480-2 1xPhospho [S352]; P17480-1 1xPhospho [S389]	[K].QATSPASKKPAQEGGK.[G]	1xPhospho [S4]	Used	1	1664.8	5.9	85.9	11.4	230.5	238.6	150.9	7.3	117.5	51.9		Peak Found	Peak Found	Peak Found	High	Peak Found	Peak Found	Peak Found	Peak Found	Peak Found
P17676	R.AYLGYQAVPSGSSGSLSTSSSSSPPGTPSPADAK.A	[209-242]	P17676 1xPhospho [S]; P17676-3 1xPhospho [S]; P17676-2 1xPhospho [S]	[R].AYLGYQAVPSGSSGSLSTSSSSSPPGTPSPADAK.[A]	1xPhospho [S]	Used	0	3278.47	84.5			146.5		181.2	24.8	229	234		High	Not Found	Not Found	High	Not Found	Peak Found	High	High	Peak Found
P17812	R.SGSSSPDSEITELKFPSINHD.-	[571-591]	P17812-2 1xPhospho [T/S]; P17812 1xPhospho [T/S]	[R].SGSSSPDSEITELKFPSINHD.[-]	1xPhospho [T/S]	Used	1	2327.01	75.5	90.6	118.1	129.5	139.2	147.7	71.8	64.6	63.1		High	High	High	High	High	High	High	High	High
P17812	R.SGSSSPDSEITELK.F	[571-584]	P17812-2 1xPhospho [S]; P17812 1xPhospho [S]	[R].SGSSSPDSEITELK.[F]	1xPhospho [S]	Used	0	1516.64	105.6	89.4	77.3	133.7	129.3	162.1	68.9	77.9	55.9		High	High	High	Peak Found	Peak Found	High	Peak Found	High	Peak Found
P18206	R.DPSASPGDAGEQAIR.Q	[286-300]	P18206-2 1xPhospho [S290]; P18206 1xPhospho [S290]	[R].DPSASPGDAGEQAIR.[Q]	1xPhospho [S5]	Used	0	1550.65	116.8	40.4	16.1	269.5	176	182.3	36.2	31.4	31.3		High	Peak Found	Peak Found	Peak Found	High	Peak Found	Peak Found	Peak Found	Peak Found
P18206	K.GWLRDPSASPGDAGEQAIR.Q	[282-300]	P18206-2 1xPhospho [S]; P18206 1xPhospho [S]	[K].GWLRDPSASPGDAGEQAIR.[Q]	1xPhospho [S]	Used	1	2062.93	391.1	10.5	9	138.4	143.7	148.7	33.7	13.8	10.9		Peak Found	Peak Found	Peak Found	Peak Found	High	High	Peak Found	Peak Found	Peak Found
P18583-1	K.EMEHNTVCAAGTSPVGEIGEEK.I	[1544-1565]	P18583-1 1xPhospho [T/S]; P18583-4 1xPhospho [T/S]; P18583-6 1xPhospho [T/S]; P18583-5 1xPhospho [T/S]; P18583-10 1xPhospho [T/S]; P18583-9 1xPhospho [T/S]; P18583-2 1xPhospho [T/S]; P18583-3 1xPhospho [T/S]; P18583-7 1xPhospho [T/S]	[K].EMEHNTVCAAGTSPVGEIGEEK.[I]	1xCarbamidomethyl [C8]; 1xDeamidated [N5]; 1xPhospho [T/S]	Not Used	0	2425.99										No Quan Values	Not Found	High	High	Not Found	Not Found	Not Found	Not Found	Not Found	Not Found
P18583-1	R.SFSISPVR.L	[2009-2016]	P18583-1 2xPhospho [S2011; S2013]; P18583-4 2xPhospho [S2011; S2013]; P18583-6 2xPhospho [S2011; S2013]; P18583-5 2xPhospho [S2011; S2013]; P18583-10 2xPhospho [S2011; S2013]; P18583-9 2xPhospho [S2051; S2053]; P18583-2 2xPhospho [S1692; S1694]; P18583-3 2xPhospho [S2011; S2013]; P18583-7 2xPhospho [S1971; S1973]	[R].SFSISPVR.[L]	2xPhospho [S3; S5]	Used	0	1052.42	96.1	143.7	121.8	82.7	103.9	56.3	151.3	73.3	70.8		High	High	Peak Found	High	High	Peak Found	Peak Found	Peak Found	Peak Found
P18583-1	R.RRSFSISPVR.L	[2007-2016]	P18583-1 2xPhospho [S2009; S2011]; P18583-4 2xPhospho [S2009; S2011]; P18583-6 2xPhospho [S2009; S2011]; P18583-5 2xPhospho [S2009; S2011]; P18583-10 2xPhospho [S2009; S2011]; P18583-9 2xPhospho [S2049; S2051]; P18583-2 2xPhospho [S1690; S1692]; P18583-3 2xPhospho [S2009; S2011]; P18583-7 2xPhospho [S1969; S1971]	[R].RRSFSISPVR.[L]	2xPhospho [S3; S5]	Used	2	1364.62	204.9	75.1	141.8	76	126	54.6	44.7	57.3	119.6		Peak Found	Peak Found	Peak Found	Peak Found	Peak Found	Peak Found	Peak Found	Peak Found	High
P18583-1	R.ASESSSEEKDDYEIFVK.V	[1779-1795]	P18583-1 1xPhospho [S1784]; P18583-4 1xPhospho [S1784]; P18583-6 1xPhospho [S1784]; P18583-5 1xPhospho [S1784]; P18583-10 1xPhospho [S1784]; P18583-9 1xPhospho [S1824]; P18583-2 1xPhospho [S1465]; P18583-3 1xPhospho [S1784]; P18583-7 1xPhospho [S1744]	[R].ASESSSEEKDDYEIFVK.[V]	1xPhospho [S6]	Used	1	2042.85	92.6	105.5	100.7	113.8	111.3	128.5	94.9	95.1	57.7		Peak Found	Peak Found	High	Peak Found	Peak Found	Peak Found	Peak Found	Peak Found	Peak Found
P18583-1	R.SAASPVVSSMPER.A	[1766-1778]	P18583-1 1xPhospho [S1769]; P18583-4 1xPhospho [S1769]; P18583-6 1xPhospho [S1769]; P18583-5 1xPhospho [S1769]; P18583-10 1xPhospho [S1769]; P18583-9 1xPhospho [S1809]; P18583-2 1xPhospho [S1450]; P18583-3 1xPhospho [S1769]; P18583-7 1xPhospho [S1729]	[R].SAASPVVSSMPER.[A]	1xPhospho [S4]; 1xOxidation [M10]	Used	0	1413.61	135.9	174.6	96.5	104.7	92.8	118.6	31.1	79.5	66.4		Peak Found	High	Peak Found	Peak Found	Peak Found	Peak Found	Peak Found	Peak Found	Peak Found
P18583-1	R.SAASPVVSSMPER.A	[1766-1778]	P18583-1 1xPhospho [S1769]; P18583-4 1xPhospho [S1769]; P18583-6 1xPhospho [S1769]; P18583-5 1xPhospho [S1769]; P18583-10 1xPhospho [S1769]; P18583-9 1xPhospho [S1809]; P18583-2 1xPhospho [S1450]; P18583-3 1xPhospho [S1769]; P18583-7 1xPhospho [S1729]	[R].SAASPVVSSMPER.[A]	1xPhospho [S4]	Used	0	1397.61	74.7	148.1	144.6	129.1	112.6	90.8	42.1	83.5	74.6		Peak Found	High	High	High	High	High	High	High	High
P18583-1	K.DTEEPLPVKESDQTLAALLSPK.E	[1678-1699]	P18583-1 1xPhospho [S1697]; P18583-4 1xPhospho [S1697]; P18583-6 1xPhospho [S1697]; P18583-5 1xPhospho [S1697]; P18583-10 1xPhospho [S1697]; P18583-9 1xPhospho [S1737]; P18583-2 1xPhospho [S1378]; P18583-3 1xPhospho [S1697]; P18583-7 1xPhospho [S1657]	[K].DTEEPLPVKESDQTLAALLSPK.[E]	1xPhospho [S20]	Used	1	2461.21		26.5	191		43.2	31	570		38.3		Not Found	Peak Found	High	Not Found	Peak Found	Peak Found	High	Not Found	Peak Found
P18583-1	K.ESDQTLAALLSPK.E	[1687-1699]	P18583-1 1xPhospho [S1697]; P18583-4 1xPhospho [S1697]; P18583-6 1xPhospho [S1697]; P18583-5 1xPhospho [S1697]; P18583-10 1xPhospho [S1697]; P18583-9 1xPhospho [S1737]; P18583-2 1xPhospho [S1378]; P18583-3 1xPhospho [S1697]; P18583-7 1xPhospho [S1657]	[K].ESDQTLAALLSPK.[E]	1xPhospho [S11]	Used	0	1452.7	141.8	145.1	100.3	61.5	42	35.7	132.8	138.3	102.5		High	High	High	High	Peak Found	Peak Found	Peak Found	High	High
P18583-1	R.SFSISPSR.R	[1948-1955]	P18583-1 1xPhospho [S]; P18583-4 1xPhospho [S]; P18583-6 1xPhospho [S]; P18583-5 1xPhospho [S]; P18583-10 1xPhospho [S]; P18583-9 1xPhospho [S]; P18583-2 1xPhospho [S]; P18583-3 1xPhospho [S]; P18583-7 1xPhospho [S]	[R].SFSISPSR.[R]	1xPhospho [S]	Used	0	960.419	22	181.4	137.4	86.5	87.4	80.3	126.9	99.4	78.7		High	High	High	Peak Found	High	Peak Found	Peak Found	High	Peak Found
P18583-1	R.SFSISPVR.L	[2009-2016]	P18583-1 1xPhospho [S]; P18583-4 1xPhospho [S]; P18583-6 1xPhospho [S]; P18583-5 1xPhospho [S]; P18583-10 1xPhospho [S]; P18583-9 1xPhospho [S]; P18583-2 1xPhospho [S]; P18583-3 1xPhospho [S]; P18583-7 1xPhospho [S]	[R].SFSISPVR.[L]	1xPhospho [S]	Used	0	972.455	96.1	160	121.2	91	82.4	85.1	104.2	92	68		High	High	High	High	High	High	High	High	High
P18583-1	K.SVESTSPEPSK.I	[278-288]	P18583-1 1xPhospho [S/T]; P18583-4 1xPhospho [S/T]; P18583-6 1xPhospho [S/T]; P18583-5 1xPhospho [S/T]; P18583-10 1xPhospho [S/T]; P18583-9 1xPhospho [S/T]; P18583-2 1xPhospho [S/T]; P18583-3 1xPhospho [S/T]; P18583-7 1xPhospho [S/T]; P18583-8 1xPhospho [S/T]	[K].SVESTSPEPSK.[I]	1xPhospho [S/T]	Used	0	1227.51	79.2	98.7	79.5	75.7	76.8	90.1	119	166.8	114.3		High	High	High	High	High	High	High	High	High
P18583-1	K.EMEHNTVCAAGTSPVGEIGEEK.I	[1544-1565]	P18583-1 1xPhospho [T/S]; P18583-4 1xPhospho [T/S]; P18583-6 1xPhospho [T/S]; P18583-5 1xPhospho [T/S]; P18583-10 1xPhospho [T/S]; P18583-9 1xPhospho [T/S]; P18583-2 1xPhospho [T/S]; P18583-3 1xPhospho [T/S]; P18583-7 1xPhospho [T/S]	[K].EMEHNTVCAAGTSPVGEIGEEK.[I]	1xCarbamidomethyl [C8]; 1xPhospho [T/S]; 1xOxidation [M2]	Used	0	2441	93	131.9	126.9	50.1	83.5	49	95.8	119.7	150.1		High	High	High	High	High	High	High	High	High
P18583-1	K.EMEHNTVCAAGTSPVGEIGEEK.I	[1544-1565]	P18583-1 1xPhospho [T/S]; P18583-4 1xPhospho [T/S]; P18583-6 1xPhospho [T/S]; P18583-5 1xPhospho [T/S]; P18583-10 1xPhospho [T/S]; P18583-9 1xPhospho [T/S]; P18583-2 1xPhospho [T/S]; P18583-3 1xPhospho [T/S]; P18583-7 1xPhospho [T/S]	[K].EMEHNTVCAAGTSPVGEIGEEK.[I]	1xCarbamidomethyl [C8]; 1xPhospho [T/S]	Used	0	2425	87.4	124.8	148.7	76.4	72.2	44.6	110.9	111.3	123.6		High	High	High	High	High	High	High	High	High
P18583-1	K.EMEHNTVCAAGTSPVGEIGEEK.I	[1544-1565]	P18583-1 1xPhospho [T1549]; P18583-4 1xPhospho [T1549]; P18583-6 1xPhospho [T1549]; P18583-5 1xPhospho [T1549]; P18583-10 1xPhospho [T1549]; P18583-9 1xPhospho [T1589]; P18583-2 1xPhospho [T1230]; P18583-3 1xPhospho [T1549]; P18583-7 1xPhospho [T1509]	[K].EMEHNTVCAAGTSPVGEIGEEK.[I]	1xCarbamidomethyl [C8]; 1xDeamidated [N5]; 1xPhospho [T6]; 1xOxidation [M2]	Used	0	2441.98	827.5					72.5					Peak Found	Not Found	Not Found	Not Found	Not Found	High	Not Found	Not Found	Not Found
P18615	R.RSDSFPER.R	[248-255]	P18615 1xPhospho [S251]; P18615-4 1xPhospho [S221]; P18615-3 1xPhospho [S258]	[R].RSDSFPER.[R]	1xPhospho [S4]	Used	1	1073.44	133.3		50.7	128.4	111.6	265.5		109.5	100.9		High	Not Found	Peak Found	Peak Found	Peak Found	High	Not Found	Peak Found	Peak Found
P18615	R.SISADDDLQESSR.R	[113-125]	P18615 1xPhospho [S115]; P18615-4 1xPhospho [S115]; P18615-3 1xPhospho [S122]	[R].SISADDDLQESSR.[R]	1xPhospho [S3]	Used	0	1502.6	86.7	75.4	61.1	142.4	90.6	111.1	74.5	133	125.2		High	High	Peak Found	High	High	High	High	High	High
P18615	R.SLSEQPVMDTATATEQAK.Q	[49-66]	P18615 1xPhospho [S51]; P18615-4 1xPhospho [S51]; P18615-3 1xPhospho [S58]	[R].SLSEQPVMDTATATEQAK.[Q]	1xPhospho [S3]	Used	0	1986.87		165.9	109.6	123.2	100.1	101.4	55.3	123.9	120.6		Not Found	High	High	High	Peak Found	Peak Found	Peak Found	Peak Found	Peak Found
P18669	R.HGESAWNLENR.F	[11-21]	P18669 1xPhospho [S14]	[R].HGESAWNLENR.[F]	1xPhospho [S4]	Used	0	1392.57	138.6	128.1	73.4	129.3	143.8	131.6	39.4	60	55.9		High	High	High	High	High	High	Peak Found	High	Peak Found
P18754-1	K.RRSPPADAIPK.S	[9-19]	P18754-1 1xPhospho [S11]; P18754-2 1xPhospho [S11]	[K].RRSPPADAIPK.[S]	1xPhospho [S3]	Used	2	1287.66	116.9	86.9	106.4	78.3	112.1	98.7	78.3	99.7	122.7		High	High	High	High	High	High	High	High	High
P18754-1	R.RSPPADAIPK.S	[10-19]	P18754-1 1xPhospho [S11]; P18754-2 1xPhospho [S11]	[R].RSPPADAIPK.[S]	1xPhospho [S2]	Used	1	1131.56	89.3	144.7	116.6	69.8	112.2	97.5	76.6	100.9	92.5		High	Peak Found	Peak Found	Peak Found	Peak Found	Peak Found	Peak Found	Peak Found	Peak Found
P18754-1	R.SPPADAIPK.S	[11-19]	P18754-1 1xPhospho [S11]; P18754-2 1xPhospho [S11]	[R].SPPADAIPK.[S]	1xPhospho [S1]	Used	0	975.455	87.5	95.3	74.4	97.4	96.7	122.8	129	112.1	84.8		High	High	Peak Found	High	High	High	High	High	High
P18858	K.TSKAETPTESVSEPEVATK.Q	[190-208]	P18858-3 1xPhospho [T164]; P18858 1xPhospho [T195]; P18858-2 1xPhospho [T195]	[K].TSKAETPTESVSEPEVATK.[Q]	1xPhospho [T6]	Used	1	2070.95		45.8	53	106.8	122.7	138.1	121.4	156.4	155.8		Not Found	Peak Found	Peak Found	Peak Found	High	Peak Found	Peak Found	Peak Found	Peak Found
P18858	K.AETPTESVSEPEVATK.Q	[193-208]	P18858-3 1xPhospho [T164]; P18858 1xPhospho [T195]; P18858-2 1xPhospho [T195]	[K].AETPTESVSEPEVATK.[Q]	1xPhospho [T3]	Used	0	1754.77	78.8		32	170.9	114.8	101.1	153.3	153.7	95.3		High	Not Found	High	Peak Found	Peak Found	High	High	High	Peak Found
P18858	R.TIQEVLEEQSEDEDREAK.R	[132-149]	P18858-3 1xPhospho [S111]; P18858 1xPhospho [S141]; P18858-2 1xPhospho [S141]	[R].TIQEVLEEQSEDEDREAK.[R]	1xPhospho [S10]	Used	1	2227.96	43.6	44.1	50.6	94.4	149.1	122.4	134.3	128.8	132.8		Peak Found	Peak Found	Peak Found	Peak Found	Peak Found	Peak Found	Peak Found	Peak Found	High
P18858	R.VLGSEGEEEDEALSPAK.G	[63-79]	P18858-3 1xPhospho [S]; P18858 1xPhospho [S]; P18858-2 1xPhospho [S]	[R].VLGSEGEEEDEALSPAK.[G]	1xPhospho [S]	Used	0	1839.79	122	72.6	69	95.2	75.5	84.9	146.4	127.1	107.3		High	High	Peak Found	High	High	High	High	High	Peak Found
P18887	K.TKPTQAAGPSSPQKPPTPEETK.A	[437-458]	P18887 2xPhospho [T440; T453]	[K].TKPTQAAGPSSPQKPPTPEETK.[A]	2xPhospho [T4; T17]	Used	0	2437.1	128.5	79.8	84.9	132.8	160.8	122.6	65.3	55.3	70		High	High	High	High	High	High	High	High	High
P18887	R.AIGSTSKPQESPKGK.R	[231-245]	P18887 1xPhospho [T235]	[R].AIGSTSKPQESPKGK.[R]	1xPhospho [T5]	Used	1	1594.78	60.8	65.9	48	208.4	167.1	138.5	30	112.3	69		Peak Found	Peak Found	Peak Found	High	High	High	Peak Found	Peak Found	Peak Found
P18887	K.TKPTQAAGPSSPQKPPTPEETK.A	[437-458]	P18887 1xPhospho [T/S]	[K].TKPTQAAGPSSPQKPPTPEETK.[A]	1xPhospho [T/S]	Used	0	2357.14	88.8	68.3	85.8	149.2	182.3	133.9	50.7	58.7	82.4		Peak Found	Peak Found	High	High	High	High	Peak Found	Peak Found	High
P18887	K.KTPSKPPAQLSPSVPK.R	[256-271]	P18887 1xPhospho [S266]	[K].KTPSKPPAQLSPSVPK.[R]	1xPhospho [S11]	Used	1	1741.92	104	49.3	72.5	142.8	188	142.9	41.6	73.9	84.9		High	High	Peak Found	High	High	High	High	High	Peak Found
P18887	R.AIGSTSKPQESPK.G	[231-243]	P18887 1xPhospho [S241]	[R].AIGSTSKPQESPK.[G]	1xPhospho [S11]	Used	0	1409.67	63.8	71.3	40.4	218.5	150.3	122.1	34.1	113.1	86.4		High	Peak Found	Peak Found	High	Peak Found	High	Peak Found	Peak Found	Peak Found
P19021-1	R.GKGSGGLNLGNFFASR.K	[915-930]	P19021-5 1xPhospho [S919]; P19021-4 1xPhospho [S832]; P19021-1 1xPhospho [S918]; P19021-3 1xPhospho [S850]; P19021-2 1xPhospho [S811]	[RK].GKGSGGLNLGNFFASR.[K]	1xPhospho [S4]	Used	1	1661.78	116.5	146.8	289.9		18	32.6	234.8	29.2	32.2		Peak Found	Peak Found	Peak Found	Not Found	Peak Found	Peak Found	High	Peak Found	Peak Found
P19174-2	R.AREGSFESR.Y	[1245-1253]	P19174-1 1xPhospho [S1248]; P19174-2 1xPhospho [S1249]	[R].AREGSFESR.[Y]	1xPhospho [S5]	Used	1	1118.46	127.2	107.3	78.1	29.1	36.1	40.9	133.5	166.5	181.4		High	High	Peak Found	Peak Found	Peak Found	Peak Found	Peak Found	High	High
P19174-2	K.IDIFPAKQENGDLSPFSGTSLR.E	[1209-1230]	P19174-2 1xPhospho [S1222]	[K].IDIFPAKQENGDLSPFSGTSLR.[E]	1xPhospho [S14]	Used	1	2472.18			115.2				784.8				Not Found	Not Found	Peak Found	Not Found	Not Found	Not Found	High	Not Found	Not Found
P19338	K.KVVVSPTKK.V	[63-71]	P19338 1xPhospho [T/S]	[K].KVVVSPTKK.[V]	1xPhospho [T/S]	Used	2	1065.61	19.1	105.9	28.9	121	119.5	69.9	25.9	308	101.7		High	High	High	High	High	High	High	High	High
P19338	R.LELQGPRGSPNAR.S	[555-567]	P19338 1xPhospho [S563]	[R].LELQGPRGSPNAR.[S]	1xPhospho [S9]	Used	1	1474.72	67.7	78.1	91.8	70.6	93.8	110.6	114.1	131.7	141.5		High	High	High	High	High	High	High	High	High
P19338	K.KVVVSPTK.K	[63-70]	P19338 1xPhospho [S67]	[K].KVVVSPTK.[K]	1xPhospho [S5]	Used	1	937.512	85.5	70.9	58.3	83.2	45.6	49.2	133.8	217.2	156.3		High	High	High	High	High	Peak Found	High	High	High
P19338	K.VVVSPTKK.V	[64-71]	P19338 1xPhospho [S67]	[K].VVVSPTKK.[V]	1xPhospho [S4]	Used	1	937.512	24.5	82.7	16.4	156.6	115.6	84.1	22.7	320.1	77.5		High	High	Peak Found	High	High	High	High	High	High
P19338	K.VVVSPTK.K	[64-70]	P19338 1xPhospho [S67]	[K].VVVSPTK.[K]	1xPhospho [S4]	Used	0	809.417	59.3	74.4	58.6	74.7	46.3	63.4	157.3	206.8	159.3		Peak Found	High	Peak Found	High	Peak Found	Peak Found	High	High	High
P19338	R.LELQGPRGSPNAR.S	[555-567]	P19338 1xPhospho [S563]	[R].LELQGPRGSPNAR.[S]	1xDeamidated [N/Q]; 1xPhospho [S9]	Used	1	1475.7	61.9	79	103.2	77.7	93	108.6	114.3	131	131.3		High	High	Peak Found	High	High	High	High	High	High
P19532	R.AASDPLLSSVSPAVSK.A	[546-561]	P19532 1xPhospho [S]	[R].AASDPLLSSVSPAVSK.[A]	1xPhospho [S]	Not Used	0	1608.79										No Quan Values	Not Found	Peak Found	Peak Found	Peak Found	Peak Found	High	Peak Found	High	High
P19838	K.TTSQAHSLPLSPASTR.Q	[897-912]	P19838-3 1xPhospho [S727]; P19838-2 1xPhospho [S908]; P19838 1xPhospho [S907]	[K].TTSQAHSLPLSPASTR.[Q]	1xPhospho [S11]	Used	0	1733.82	157.8	149.2	139.2	96.8	72.2	79.9	58.4	79.7	66.7		High	High	High	High	Peak Found	Peak Found	Peak Found	Peak Found	High
P20042	-.MSGDEMIFDPTMSKK.K	[1-15]	P20042 1xPhospho [S2]; 1xMet-loss+Acetyl [N-Term]	[-].MSGDEMIFDPTMSKK.[K]	1xPhospho [S2]; 1xOxidation [M]; 1xMet-loss+Acetyl [N-Term]	Used	1	1723.7		160.9	180.5	62.8	26.6	25.2	120.9	141.8	181.3		Not Found	High	High	High	High	Peak Found	High	High	High
P20042	-.MSGDEMIFDPTMSK.K	[1-14]	P20042 1xPhospho [S2]; 1xMet-loss+Acetyl [N-Term]	[-].MSGDEMIFDPTMSK.[K]	1xPhospho [S2]; 1xOxidation [M]; 1xMet-loss+Acetyl [N-Term]	Used	0	1595.6	39.1	157.1	143.8	121	30.8	27.8	127.3	138.9	114.3		High	High	High	High	High	High	High	High	High
P20042	-.MSGDEMIFDPTMSK.K	[1-14]	P20042 1xPhospho [S2]; 1xMet-loss+Acetyl [N-Term]	[-].MSGDEMIFDPTMSK.[K]	1xPhospho [S2]; 1xMet-loss+Acetyl [N-Term]	Used	0	1579.61	23.2	211	193.2	131.5	38.8	20.9	141.6	72.2	67.5		High	High	High	High	Peak Found	Peak Found	High	High	High
P20042	-.MSGDEMIFDPTMSKK.K	[1-15]	P20042 1xPhospho [S2]; 1xMet-loss+Acetyl [N-Term]	[-].MSGDEMIFDPTMSKK.[K]	1xPhospho [S2]; 1xMet-loss+Acetyl [N-Term]	Used	1	1707.7		192.3	202.9	142.1	43.8	22.9	96.3	101	98.5		Not Found	High	High	High	Peak Found	Peak Found	High	Peak Found	High
P20700	R.AGGPTTPLSPTR.L	[15-26]	P20700 1xPhospho [S23]	[R].AGGPTTPLSPTR.[L]	1xPhospho [S9]	Used	0	1234.58	71.8	89.9	52.3	114.3	89.8	97.2		235.3	149.4		Peak Found	Peak Found	Peak Found	Peak Found	Peak Found	Peak Found	Not Found	High	High
P20700; Q03252	R.LKLSPSPSSR.V	[402-411]	P20700 2xPhospho [S391; S393]; Q03252 2xPhospho [S405; S407]	[R].LKLSPSPSSR.[V]	2xPhospho [S4; S6]	Not Used	1	1231.55	88	114.3	102	97.3	148.5	98.1	106.3	81.2	64.3	Shared	High	High	High	High	High	High	High	High	High
P20700; Q03252	R.LKLSPSPSSR.V	[388-397]	P20700 2xPhospho [S391; S393]; Q03252 2xPhospho [S405; S407]	[R].LKLSPSPSSR.[V]	2xPhospho [S4; S6]	Not Used	1	1231.55	88	114.3	102	97.3	148.5	98.1	106.3	81.2	64.3	Shared	High	High	High	High	High	High	High	High	High
P20700; Q03252	K.LSPSPSSR.V	[404-411]	P20700 1xPhospho [S393]; Q03252 1xPhospho [S407]	[K].LSPSPSSR.[V]	1xPhospho [S4]	Not Used	0	910.403	73.8	97.2	64	115.8	110.9	152.2	85	117.7	83.4	Shared	Peak Found	High	Peak Found	High	Peak Found	High	Peak Found	High	Peak Found
P20700; Q03252	K.LSPSPSSR.V	[390-397]	P20700 1xPhospho [S393]; Q03252 1xPhospho [S407]	[K].LSPSPSSR.[V]	1xPhospho [S4]	Not Used	0	910.403	73.8	97.2	64	115.8	110.9	152.2	85	117.7	83.4	Shared	Peak Found	High	Peak Found	High	Peak Found	High	Peak Found	High	Peak Found
P20700; Q03252	R.LKLSPSPSSR.V	[402-411]	P20700 1xPhospho [S]; Q03252 1xPhospho [S]	[R].LKLSPSPSSR.[V]	1xPhospho [S]	Not Used	1	1151.58	81.1	81.2	71.4	120.4	110.3	132.1	81.4	123.6	98.6	Shared	High	High	High	High	High	High	High	High	High
P20700; Q03252	R.LKLSPSPSSR.V	[388-397]	P20700 1xPhospho [S]; Q03252 1xPhospho [S]	[R].LKLSPSPSSR.[V]	1xPhospho [S]	Not Used	1	1151.58	81.1	81.2	71.4	120.4	110.3	132.1	81.4	123.6	98.6	Shared	High	High	High	High	High	High	High	High	High
P20810-1	K.SLTPAVPVESKPDKPSGK.S	[133-150]	P20810-8 1xPhospho [S/T]; P20810-3 1xPhospho [S/T]; P20810-6 1xPhospho [S/T]; P20810-9 1xPhospho [S/T]; P20810-4 1xPhospho [S/T]; P20810-1 1xPhospho [S/T]; P20810-7 1xPhospho [S/T]; P20810-2 1xPhospho [S/T]; P20810-10 1xPhospho [S/T]; P20810-5 1xPhospho [S/T]	[K].SLTPAVPVESKPDKPSGK.[S]	1xPhospho [S/T]	Used	0	1916.97	407.6	211.6	167.6		39.7			36	37.5		High	High	High	Not Found	Peak Found	Not Found	Not Found	Peak Found	Peak Found
P20810-1	K.KEGITGPPADSSKPIGPDDAIDALSSDFTCGSPTAAGK.K	[212-249]	P20810-8 1xPhospho [S221]; P20810-6 1xPhospho [S326]; P20810-9 1xPhospho [S285]; P20810-4 1xPhospho [S202]; P20810-1 1xPhospho [S243]; P20810-7 1xPhospho [S307]; P20810-10 1xPhospho [S304]	[K].KEGITGPPADSSKPIGPDDAIDALSSDFTCGSPTAAGK.[K]	1xCarbamidomethyl [C30]; 1xPhospho [S32]	Used	1	3810.74	190.3	233.5	186.6	36.7	78	73.7		60.7	40.5		High	Peak Found	High	Peak Found	Peak Found	Peak Found	Not Found	Peak Found	Peak Found
P20810-1	K.EGITGPPADSSKPIGPDDAIDALSSDFTCGSPTAAGK.K	[213-249]	P20810-8 1xPhospho [T/S]; P20810-6 1xPhospho [T/S]; P20810-9 1xPhospho [T/S]; P20810-4 1xPhospho [T/S]; P20810-1 1xPhospho [T/S]; P20810-7 1xPhospho [T/S]; P20810-10 1xPhospho [T/S]	[K].EGITGPPADSSKPIGPDDAIDALSSDFTCGSPTAAGK.[K]	1xCarbamidomethyl [C29]; 1xPhospho [T/S]	Used	0	3682.65	218.2	245.5	127.2	64.3	68.2	43.6	28.6	46.9	57.5		High	High	High	Peak Found	Peak Found	Peak Found	Peak Found	Peak Found	Peak Found
P20823-1	R.GVSPSQAQGLGSNLVTEVR.V	[245-263]	P20823-7 1xPhospho [S247]; P20823-2 1xPhospho [S247]; P20823-6 1xPhospho [S130]; P20823-1 1xPhospho [S247]; P20823-3 1xPhospho [S247]	[R].GVSPSQAQGLGSNLVTEVR.[V]	1xDeamidated [N13]; 1xPhospho [S3]	Not Used	0	1979.94										No Quan Values	Not Found	Not Found	Not Found	Not Found	Not Found	High	High	Not Found	Not Found
P20823-1	R.GVSPSQAQGLGSNLVTEVR.V	[245-263]	P20823-7 1xPhospho [S]; P20823-2 1xPhospho [S]; P20823-6 1xPhospho [S]; P20823-1 1xPhospho [S]; P20823-3 1xPhospho [S]	[R].GVSPSQAQGLGSNLVTEVR.[V]	1xPhospho [S]	Used	0	1978.96				139.9	125.4	156	155.5	171	152.2		Not Found	Not Found	Not Found	High	High	High	High	High	High
P20962	-.MSEKSVEAAAELSAK.D	[1-15]	P20962 1xPhospho [S2]; 1xMet-loss+Acetyl [N-Term]	[-].MSEKSVEAAAELSAK.[D]	1xPhospho [S2]; 1xMet-loss+Acetyl [N-Term]	Not Used	1	1541.71										No Quan Values	Not Found	Not Found	Not Found	High	Not Found	High	Not Found	High	High
P21291	K.GFGFGQGAGALVHSE.-	[179-193]	P21291 1xPhospho [S192]	[K].GFGFGQGAGALVHSE.[-]	1xPhospho [S14]	Used	0	1513.65	57.8	63.1	67.2	189.3	142.8	185.2	61.7	76.1	56.9		High	Peak Found	Peak Found	Peak Found	High	High	Peak Found	Peak Found	Peak Found
P21333	K.FNEEHIPDSPFVVPVASPSGDAR.R	[2311-2333]	P21333 1xPhospho [S]; P21333-2 1xPhospho [S]	[K].FNEEHIPDSPFVVPVASPSGDAR.[R]	1xPhospho [S]	Used	0	2547.16		248	263		96.2		292.8				Not Found	High	Peak Found	Not Found	Peak Found	Not Found	High	Not Found	Not Found
P21333	K.CSGPGLSPGMVR.A	[1453-1464]	P21333 1xPhospho [S1459]; P21333-2 1xPhospho [S1459]	[K].CSGPGLSPGMVR.[A]	1xCarbamidomethyl [C1]; 1xPhospho [S7]; 1xOxidation [M10]	Used	0	1313.54	39	108.2	90.7	55.4	60.3	80.2	161.2	155.3	149.7		Peak Found	High	Peak Found	Peak Found	High	High	High	High	High
P21333	K.CSGPGLSPGMVR.A	[1453-1464]	P21333 1xPhospho [S1459]; P21333-2 1xPhospho [S1459]	[K].CSGPGLSPGMVR.[A]	1xCarbamidomethyl [C1]; 1xPhospho [S7]	Used	0	1297.54	50.6	134.8	110.2	79.8	78.1	59.1	125.7	138.6	123.1		Peak Found	Peak Found	High	High	High	High	High	High	High
P21333	R.RAPSVANVGSHCDLSLK.I	[2149-2165]	P21333 1xPhospho [S2152]; P21333-2 1xPhospho [S2144]	[R].RAPSVANVGSHCDLSLK.[I]	1xCarbamidomethyl [C12]; 1xPhospho [S4]	Used	1	1890.89	265.6	114.5	99.6	76.3	68.3	48	47.2	76.2	104.3		High	High	High	Peak Found	High	Peak Found	Peak Found	Peak Found	High
P21359-1	K.SFDHLISDTK.A	[2543-2552]	P21359-2 1xPhospho [S2522]; P21359-6 1xPhospho [S2522]; P21359-1 1xPhospho [S2543]	[K].SFDHLISDTK.[A]	1xPhospho [S1]	Used	0	1242.54				377.5	309.3	207.7		5.5			Not Found	Not Found	Not Found	High	High	High	Not Found	Peak Found	Not Found
P21359-1	K.GSEGYLAATYPTVGQTSPR.A	[2499-2517]	P21359-2 1xPhospho [S/T]; P21359-6 1xPhospho [S/T]; P21359-1 1xPhospho [S/T]	[K].GSEGYLAATYPTVGQTSPR.[A]	1xPhospho [S/T]	Used	0	2034.92				211.6	176.2	187.5	112	106.7	106		Not Found	Not Found	Not Found	High	Peak Found	High	Peak Found	Peak Found	High
P21709	R.LPSLSGSDGIPYR.T	[904-916]	P21709 1xPhospho [S]	[R].LPSLSGSDGIPYR.[T]	1xPhospho [S]	Used	0	1441.67		115.9	84	255.5	207.6	220.9	6.5	4.7	4.9		Not Found	Peak Found	Peak Found	High	High	High	Peak Found	Peak Found	Peak Found
P21796	K.LTFDSSFSPNTGKK.N	[97-110]	P21796 1xPhospho [S/T]	[K].LTFDSSFSPNTGKK.[N]	1xPhospho [S/T]	Used	1	1608.73	97.8	135.7	134.1	48.3	49.8	54.2	133.3	127.5	119.3		High	High	High	High	High	High	High	High	High
P21860-1	K.RESGPGIAPGPEPHGLTNK.K	[980-998]	P21860-4 1xPhospho [S923]; P21860-1 1xPhospho [S982]; P21860-5 1xPhospho [S339]	[K].RESGPGIAPGPEPHGLTNK.[K]	1xPhospho [S3]	Used	1	1993.95	392.5	160.6	218.7	60.2	67.9						High	Peak Found	High	Peak Found	Peak Found	Not Found	Not Found	Not Found	Not Found
P22059	R.TGSNISGASSDISLDEQYK.H	[377-395]	P22059 1xPhospho [S379]	[R].TGSNISGASSDISLDEQYK.[H]	1xPhospho [S3]	Used	0	2051.88	52.7	54.2	35.3	154	105.9	122.3	128.1	130.7	116.7		Peak Found	Peak Found	Peak Found	Peak Found	High	High	Peak Found	Peak Found	Peak Found
P22059	R.SLSELESLKLPAESNEK.I	[238-254]	P22059 1xPhospho [S]	[R].SLSELESLKLPAESNEK.[I]	1xPhospho [S]	Used	1	1953.94	57.5	109.5	73.1	104.9	85.9	91.7	108.5	144.8	124.1		High	Peak Found	Peak Found	Peak Found	High	Peak Found	High	Peak Found	Peak Found
P22087	K.RVSISEGDDKIEYR.A	[122-135]	P22087 1xPhospho [S]	[K].RVSISEGDDKIEYR.[A]	1xPhospho [S]	Used	2	1746.81	113.8	93.7	161.8	85.4	60.7	37	60.2	130.5	156.9		Peak Found	High	High	High	Peak Found	Peak Found	High	High	High
P22234	K.TKEVYELLDSPGK.V	[18-30]	P22234 1xPhospho [S27]; P22234-2 1xPhospho [S27]	[K].TKEVYELLDSPGK.[V]	1xPhospho [S10]	Used	1	1558.74	81.6		113.7		189.4		190.8	232.5	91.9		Peak Found	Not Found	Peak Found	High	Peak Found	Not Found	High	Peak Found	Peak Found
P22314	K.NGSEADIDEGLYSR.Q	[44-57]	P22314-2 1xPhospho [S6]; P22314 1xPhospho [S46]	[K].NGSEADIDEGLYSR.[Q]	1xPhospho [S3]	Used	0	1605.64	62	132.7	89.9	62.9	54	68.6	158.9	143.6	127.3		Peak Found	High	High	Peak Found	High	High	High	Peak Found	High
P22314	-.MSSSPLSKK.R	[1-9]	P22314 1xPhospho [S]; 1xMet-loss+Acetyl [N-Term]	[-].MSSSPLSKK.[R]	1xPhospho [S]; 1xMet-loss+Acetyl [N-Term]	Used	1	955.45	53.6	95.2	80.2	86.5	43.8	64.6	107.7	216.6	151.9		High	High	High	High	High	High	High	High	High
P22314	K.NGSEADIDEGLYSR.Q	[44-57]	P22314-2 1xPhospho [S6]; P22314 1xPhospho [S46]	[K].NGSEADIDEGLYSR.[Q]	1xDeamidated [N1]; 1xPhospho [S3]	Used	0	1606.63	98.9	144.4	96.2	64.4	60.1	67	143	119.2	106.8		High	High	High	High	High	High	High	High	High
P22314	R.RVSGPDPKPGSNCSPAQSVLSEVPSVPTNGMAK.N	[11-43]	P22314 1xPhospho [S13]	[R].RVSGPDPKPGSNCSPAQSVLSEVPSVPTNGMAK.[N]	1xCarbamidomethyl [C13]; 1xPhospho [S3]	Used	1	3430.61	69.2	132.3	134.6	121	52.8		128.4		261.8		High	Peak Found	Peak Found	High	High	Not Found	Peak Found	Not Found	High
P22314	K.RRVSGPDPKPGSNCSPAQSVLSEVPSVPTNGMAK.N	[10-43]	P22314 1xPhospho [S13]	[K].RRVSGPDPKPGSNCSPAQSVLSEVPSVPTNGMAK.[N]	1xCarbamidomethyl [C14]; 1xDeamidated [N30]; 1xPhospho [S4]; 1xOxidation [M32]	Used	2	3603.69	68.6	144.1	157.6	66	104.4	24.5	88.1	44.7	202.1		High	Peak Found	High	Peak Found	Peak Found	Peak Found	High	High	High
P22314	R.RVSGPDPKPGSNCSPAQSVLSEVPSVPTNGMAK.N	[11-43]	P22314 1xPhospho [S13]	[R].RVSGPDPKPGSNCSPAQSVLSEVPSVPTNGMAK.[N]	1xCarbamidomethyl [C13]; 1xDeamidated [N29]; 1xPhospho [S3]; 1xOxidation [M31]	Used	1	3447.59	87	169.2	127.7	62	44.4	44.7	127.3	87.1	150.6		High	High	High	Peak Found	High	High	High	High	High
P22314	R.RVSGPDPKPGSNCSPAQSVLSEVPSVPTNGMAK.N	[11-43]	P22314 1xPhospho [S13]	[R].RVSGPDPKPGSNCSPAQSVLSEVPSVPTNGMAK.[N]	1xCarbamidomethyl [C13]; 1xDeamidated [N29]; 1xPhospho [S3]	Used	1	3431.6	72.9	113.3	161.6	67.2	49.6	32.6	172.6	77.7	152.5		High	High	High	High	High	Peak Found	High	High	High
P22314	R.RVSGPDPKPGSNCSPAQSVLSEVPSVPTNGMAK.N	[11-43]	P22314 1xPhospho [S13]	[R].RVSGPDPKPGSNCSPAQSVLSEVPSVPTNGMAK.[N]	1xCarbamidomethyl [C13]; 2xDeamidated [N29; Q/N]; 1xPhospho [S3]; 1xOxidation [M31]	Used	1	3448.58	460.4		177.3		75.1	58		129.3			High	High	Peak Found	Not Found	High	Peak Found	High	High	Not Found
P22314	R.RVSGPDPKPGSNCSPAQSVLSEVPSVPTNGMAK.N	[11-43]	P22314 1xPhospho [S13]	[R].RVSGPDPKPGSNCSPAQSVLSEVPSVPTNGMAK.[N]	1xCarbamidomethyl [C13]; 2xDeamidated [N29; Q/N]; 1xPhospho [S3]	Used	1	3432.58		115	65.9	463.7			255.4				High	High	High	High	Not Found	Not Found	Peak Found	Not Found	Not Found
P22314	R.RVSGPDPKPGSNCSPAQSVLSEVPSVPTNGMAK.N	[11-43]	P22314 1xPhospho [S13]	[R].RVSGPDPKPGSNCSPAQSVLSEVPSVPTNGMAK.[N]	1xCarbamidomethyl [C13]; 3xDeamidated [N12; Q17; N29]; 1xPhospho [S3]	Used	1	3433.57	222.2			69.2		54.1		554.5			Peak Found	Not Found	Not Found	Peak Found	Not Found	Peak Found	Not Found	High	Not Found
P22455-1	R.RPPGPDLSPDGPR.S	[566-578]	P22455-3 1xPhospho [S363]; P22455-2 1xPhospho [S533]; P22455-1 1xPhospho [S573]	[R].RPPGPDLSPDGPR.[S]	1xPhospho [S8]	Used	0	1440.66	154	105.4	73.4	82	87.3	56.8	72.7	135.1	133.2		Peak Found	High	Peak Found	Peak Found	Peak Found	Peak Found	Peak Found	High	Peak Found
P22626	R.GFGDGYNGYGGGPGGGNFGGSPGYGGGR.G	[239-266]	P22626-2 1xPhospho [S247]; P22626 1xPhospho [S259]	[R].GFGDGYNGYGGGPGGGNFGGSPGYGGGR.[G]	1xPhospho [S21]	Used	0	2575.01		38.5	52.6	104.4	75	106.7	76.9	252.8	193.2		Not Found	Peak Found	Peak Found	Peak Found	Peak Found	Peak Found	Peak Found	High	High
P22626	R.GFGDGYNGYGGGPGGGNFGGSPGYGGGR.G	[239-266]	P22626-2 1xPhospho [S247]; P22626 1xPhospho [S259]	[R].GFGDGYNGYGGGPGGGNFGGSPGYGGGR.[G]	1xDeamidated [N7]; 1xPhospho [S21]	Used	0	2575.99		70.4	48.2		69.7	120.1	123.5	309.9	158.2		Not Found	Peak Found	Peak Found	Not Found	Peak Found	High	High	High	High
P22670	R.ASPATVQWLLDNYETAEGVSLPR.S	[434-456]	P22670 2xPhospho [Y446; T448]	[R].ASPATVQWLLDNYETAEGVSLPR.[S]	1xDeamidated [N12]; 2xPhospho [Y13; T15]	Not Used	0	2678.18										No Quan Values	Not Found	Not Found	Not Found	Not Found	Not Found	Not Found	High	Not Found	Not Found
P22681	K.IKPSSSANAIYSLAARPLPVPK.L	[664-685]	P22681 1xPhospho [S668]	[K].IKPSSSANAIYSLAARPLPVPK.[L]	1xPhospho [S5]	Used	0	2360.27	111.9	191.5	172.3	80.2	102	139.7	66.2		36.2		Peak Found	High	Peak Found	Peak Found	Peak Found	Peak Found	Peak Found	Not Found	Peak Found
P22681	K.VERPPSPFSMAPQASLPPVPPR.L	[478-499]	P22681 1xPhospho [S]	[K].VERPPSPFSMAPQASLPPVPPR.[L]	1xPhospho [S]	Used	0	2437.21	8.2	614.4	100.4		56.5		82.3		38.2		High	High	High	Not Found	Peak Found	Not Found	Peak Found	High	Peak Found
P23193	K.KKEPAITSQNSPEAR.E	[90-104]	P23193-2 1xPhospho [S79]; P23193 1xPhospho [S100]	[K].KKEPAITSQNSPEAR.[E]	1xDeamidated [N10]; 1xPhospho [S11]	Not Used	2	1736.82										No Quan Values	Peak Found	Peak Found	Peak Found	High	Peak Found	Peak Found	Peak Found	Peak Found	Peak Found
P23193	K.EPAITSQNSPEAR.E	[92-104]	P23193-2 1xPhospho [S]; P23193 1xPhospho [S]	[K].EPAITSQNSPEAR.[E]	1xPhospho [S]	Used	0	1479.65		108.3	78.7	133.3	92.2	95.5	134.1	136.9	120.9		Not Found	High	Peak Found	High	High	Peak Found	High	High	High
P23193	K.LLDGPSTEKDLDEK.K	[76-89]	P23193-2 1xPhospho [S/T]; P23193 1xPhospho [S/T]	[K].LLDGPSTEKDLDEK.[K]	1xPhospho [S/T]	Used	1	1639.75	86.7	65.5	56.1	56.7	41.8	40.7	202.9	165.9	183.8		Peak Found	Peak Found	Peak Found	Peak Found	Peak Found	Peak Found	High	High	High
P23193	K.KKEPAITSQNSPEAR.E	[90-104]	P23193-2 1xPhospho [S/T]; P23193 1xPhospho [S/T]	[K].KKEPAITSQNSPEAR.[E]	1xPhospho [S/T]	Used	2	1735.84	156.2	73.2	86.9	107.6	122.3	84.3	61.7	89.3	118.5		High	High	High	High	High	High	High	High	High
P23229-6	K.AEIHAQPSDKER.L	[1096-1107]	P23229-2 1xPhospho [S1064]; P23229-6 1xPhospho [S1103]; P23229-9 1xPhospho [S1088]; P23229-4 1xPhospho [S1059]; P23229-7 1xPhospho [S945]	[K].AEIHAQPSDKER.[L]	1xPhospho [S8]	Used	1	1460.65	155.5	139.2	101.9	101.8	122.9	132.8	28.2	60.6	57.2		Peak Found	High	High	Peak Found	High	High	Peak Found	High	High
P23396	K.KPLPDHVSIVEPKDEILPTTPISEQK.G	[202-227]	P23396-2 1xPhospho [T237]; P23396 1xPhospho [T221]	[K].KPLPDHVSIVEPKDEILPTTPISEQK.[G]	1xPhospho [T20]	Used	1	2990.55	231.7	142.5	116.1	93.6	68.9	62.8	66.8	37.4	80.2		High	High	High	High	High	Peak Found	High	High	High
P23396	K.DEILPTTPISEQK.G	[215-227]	P23396-2 1xPhospho [T]; P23396 1xPhospho [T]	[K].DEILPTTPISEQK.[G]	1xPhospho [T]	Used	0	1550.73	191.4	138.9	87.7	100.1	62.8	71.6	87	91.8	68.6		High	High	High	High	High	High	High	High	High
P23443-1	R.TPVSPVKFSPGDFWGR.G	[444-459]	P23443-2 1xPhospho [S424]; P23443-5 1xPhospho [S424]; P23443-3 1xPhospho [S394]; P23443-1 1xPhospho [S447]	[R].TPVSPVKFSPGDFWGR.[G]	1xPhospho [S4]	Used	1	1856.87	3.8	339.4	181.2		100.5		143.5		131.7		Peak Found	High	High	Not Found	Peak Found	Not Found	High	Not Found	Peak Found
P23443-1	R.TPVSPVK.F	[444-450]	P23443-2 1xPhospho [S424]; P23443-5 1xPhospho [S424]; P23443-3 1xPhospho [S394]; P23443-1 1xPhospho [S447]	[R].TPVSPVK.[F]	1xPhospho [S4]	Used	0	807.401	176.5	166.9	126.2	69.3	47.4	55	87.7	98.1	73		Peak Found	High	High	High	Peak Found	Peak Found	High	High	Peak Found
P23508-1	R.LQSVQATGPSSPGR.L	[284-297]	P23508-2 1xPhospho [T/S]; P23508-1 1xPhospho [T/S]	[R].LQSVQATGPSSPGR.[L]	1xPhospho [T/S]	Used	0	1464.68	172.7	247.4	176.2				88.4	104.7	110.7		High	High	High	Not Found	Not Found	Not Found	Peak Found	Peak Found	High
P23528	-.MASGVAVSDGVIK.V	[1-13]	P23528 1xPhospho [S3]; 1xMet-loss+Acetyl [N-Term]	[-].MASGVAVSDGVIK.[V]	1xPhospho [S3]; 1xMet-loss+Acetyl [N-Term]	Used	0	1224.59	9.9	17	8.6	266.7	191	179.6	39.1	95.7	92.3		High	High	High	High	High	High	High	High	High
P23588	R.SRTGSESSQTGTSTTSSR.N	[418-435]	P23588 2xPhospho [S422; S]; P23588-2 2xPhospho [S383; S]	[R].SRTGSESSQTGTSTTSSR.[N]	2xPhospho [S5; S]	Used	1	1976.76	56.8	180.1	69.5	59.8	27.2	40.1	118.6	138.6	209.4		Peak Found	High	High	Peak Found	Peak Found	Peak Found	High	Peak Found	Peak Found
P23588	R.SQSSDTEQQSPTSGGGK.V	[495-511]	P23588 2xPhospho [S]; P23588-2 2xPhospho [S]	[R].SQSSDTEQQSPTSGGGK.[V]	2xPhospho [S]	Used	0	1840.66	28.6	149.9	86.9	66.4	89.3	68.5	142.4	98.1	170		High	High	High	High	Peak Found	Peak Found	High	Peak Found	High
P23588	R.NRDSDKTDTDWR.A	[189-200]	P23588 1xPhospho [S192]; P23588-2 1xPhospho [S153]	[R].NRDSDKTDTDWR.[A]	1xPhospho [S4]	Used	2	1588.64	168.6	161.9			185.2		29.2	182.5	172.6		Peak Found	High	Not Found	Not Found	High	Not Found	Peak Found	High	High
P23588	R.TGSESSQTGTSTTSSR.N	[420-435]	P23588 1xPhospho [S/T]; P23588-2 1xPhospho [S/T]	[R].TGSESSQTGTSTTSSR.[N]	1xPhospho [S/T]	Used	0	1653.66	68.3	179.9	51.1	73.4	29.6	43.5	129.8	117.8	206.6		High	High	High	High	High	Peak Found	High	High	High
P23588	R.SQSSDTEQQSPTSGGGK.V	[495-511]	P23588 1xPhospho [S/T]; P23588-2 1xPhospho [S/T]	[R].SQSSDTEQQSPTSGGGK.[V]	1xPhospho [S/T]	Used	0	1760.7	74.3	126.6	60	132.6	105	90.7	102.3	93.8	114.7		High	High	High	High	High	High	High	High	High
P23588	R.SRTGSESSQTGTSTTSSR.N	[418-435]	P23588 1xPhospho [S/T]; P23588-2 1xPhospho [S/T]	[R].SRTGSESSQTGTSTTSSR.[N]	1xPhospho [S/T]	Used	1	1896.79	58.9	162.6	81.3	57.3	31	43.2	117.2	131.7	216.8		High	High	High	High	High	High	High	High	High
P23588	K.SLENETLNKEEDCHSPTSKPPKPDQPLK.V	[445-472]	P23588 1xPhospho [T/S]; P23588-2 1xPhospho [T/S]	[K].SLENETLNKEEDCHSPTSKPPKPDQPLK.[V]	1xCarbamidomethyl [C13]; 1xPhospho [S/T]	Used	1	3298.53	198.2	50.2	100.7	56.1	79.1	40.1	45	99.8	230.7		High	Peak Found	High	Peak Found	High	Peak Found	Peak Found	High	High
P24534	K.YGPADVEDTTGSGATDSKDDDDIDLFGSDDEEESEEAKR.L	[79-117]	P24534 1xPhospho [S/T]	[K].YGPADVEDTTGSGATDSKDDDDIDLFGSDDEEESEEAKR.[L]	1xPhospho [S/Y/T]	Used	2	4260.69	101.6	176.4	144	84.1	169	29.8	145.1	4.5	45.4		High	High	High	High	High	High	High	Peak Found	High
P24928	K.YSPTSPTYSPTSPK.Y; K.YSPTSPTYSPTSPK.G	[1909-1922]; [1923-1936]	P24928 2xPhospho [T1915; T1919]; 2xPhospho [T1929; T1933]	[K].YSPTSPTYSPTSPK.[YG]	2xPhospho [T7; T11]	Used	0	1672.65	10.8	145.1	150.3	55	52.7	57.4	159.1	145.3	124.3		Peak Found	Peak Found	Peak Found	Peak Found	Peak Found	Peak Found	Peak Found	High	High
P24928	K.YSPTSPK.Y; K.YSPTSPK.Y; T.YSPTSPK.Y; T.YSPTSPK.G	[1860-1866]; [1867-1873]; [1916-1922]; [1930-1936]	P24928 1xPhospho [S1864]; 1xPhospho [S1871]; 1xPhospho [S1920]; 1xPhospho [S1934]	[KT].YSPTSPK.[YG]	1xPhospho [S5]	Used	0	859.36	105.3	113.3	79.5	67.9	59.7	71.6	91.1	190.7	120.8		High	High	Peak Found	High	Peak Found	Peak Found	Peak Found	Peak Found	Peak Found
P24928	K.YSPTSPTYSPTSPVYTPTSPK.Y	[1888-1908]	P24928 1xPhospho [S]	[K].YSPTSPTYSPTSPVYTPTSPK.[Y]	1xPhospho [S]	Used	0	2338.05	82.8	134	58.9		53.5	68.6	135.2	202.5	164.6		Peak Found	Peak Found	High	Not Found	Peak Found	Peak Found	High	Peak Found	High
P24928	K.YTPTSPSYSPSSPEYTPTSPK.Y	[1839-1859]	P24928 1xPhospho [S/Y]	[K].YTPTSPSYSPSSPEYTPTSPK.[Y]	1xPhospho [S/Y]	Used	0	2354.01		127	118.3	57.4	45.4	60.7	143.3	167.5	180.4		Not Found	High	Peak Found	Peak Found	Peak Found	Peak Found	High	Peak Found	Peak Found
P24928	K.YSPTSPTYSPTTPK.Y	[1874-1887]	P24928 1xPhospho [S/T]	[K].YSPTSPTYSPTTPK.[Y]	1xPhospho [S/T]	Used	0	1606.7	105.3	104	102.3	50.4	40.2	54.1	125.7	179.3	138.7		High	High	Peak Found	High	High	Peak Found	High	High	Peak Found
P24928	K.YSPTSPTYSPTSPK.Y; K.YSPTSPTYSPTSPK.G	[1909-1922]; [1923-1936]	P24928 1xPhospho [S/T]; 1xPhospho [S/T]	[K].YSPTSPTYSPTSPK.[YG]	1xPhospho [S/T/Y]	Used	0	1592.69	39.8	134.9	98.5	58.8	56.1	65.2	135.8	167.9	142.9		High	High	High	High	High	High	High	High	High
P24941-1	K.IGEGTYGVVYK.A	[10-20]	P24941-1 2xPhospho [T14; Y15]; P06493 2xPhospho [T14; Y15]; Q00526 2xPhospho [T14; Y15]; P24941-2 2xPhospho [T14; Y15]; P06493-2 2xPhospho [T14; Y15]	[K].IGEGTYGVVYK.[AG]	2xPhospho [T5; Y6]	Used	0	1345.55		125.5	137.1		104.7	84.7	195.5	140.2	112.2		Not Found	High	High	Not Found	High	High	High	High	High
P24941-1	K.IGEGTYGVVYK.A	[10-20]	P24941-1 1xPhospho [Y/T]; P06493 1xPhospho [Y/T]; Q00526 1xPhospho [Y/T]; P24941-2 1xPhospho [Y/T]; P06493-2 1xPhospho [Y/T]	[K].IGEGTYGVVYK.[AG]	1xPhospho [Y/T]	Used	0	1265.58	57.2	90.7	74.4	83.2	67.7	68	154.7	175.1	129		High	Peak Found	High	High	High	High	High	High	High
P25054-1	R.SGRSPTGNTPPVIDSVSEK.A	[2671-2689]	P25054-3 1xPhospho [S2656]; P25054-1 1xPhospho [S2674]; P25054-2 1xPhospho [S2573]	[R].SGRSPTGNTPPVIDSVSEK.[A]	1xDeamidated [N8]; 1xPhospho [S4]	Not Used	1	2008.92										No Quan Values	High	Not Found	Not Found	Not Found	Not Found	Not Found	Not Found	Not Found	Not Found
P25098	K.NKPRSPVVELSK.V	[666-677]	P25098 1xPhospho [S670]	[K].NKPRSPVVELSK.[V]	1xPhospho [S5]	Used	1	1433.75	1.6	43.6	84.4	74	109.5	96.4	78.4	192.5	219.7		Peak Found	High	High	High	Peak Found	High	High	High	High
P25098	R.SPVVELSK.V	[670-677]	P25098 1xPhospho [S670]	[R].SPVVELSK.[V]	1xPhospho [S1]	Used	0	938.459	86.6	57.1	44.7	100.2	48.4	98.1	181.2	165.6	118.1		Peak Found	Peak Found	Peak Found	Peak Found	Peak Found	Peak Found	Peak Found	High	Peak Found
P25205	K.DGDSYDPYDFSDTEEEMPQVHTPK.T	[701-724]	P25205 2xPhospho [T713; T722]; P25205-2 2xPhospho [T758; T767]	[K].DGDSYDPYDFSDTEEEMPQVHTPK.[T]	2xPhospho [T13; T22]; 1xOxidation [M17]	Used	0	2978.06		408.5	345.7				145.8				Not Found	High	Peak Found	Not Found	Not Found	Not Found	Peak Found	Not Found	Not Found
P25205	R.SEDESETEDEEEKSQEDQEQKR.K	[668-689]	P25205 2xPhospho [S672; S]; P25205-2 2xPhospho [S717; S]	[R].SEDESETEDEEEKSQEDQEQKR.[K]	2xPhospho [S5; S]	Used	2	2844.03	78.4	149	155.8	64	169.6	43.2	66.3	89.1	84.6		High	High	Peak Found	Peak Found	Peak Found	Peak Found	Peak Found	High	High
P25205	K.DGDSYDPYDFSDTEEEMPQVHTPK.T	[701-724]	P25205 1xPhospho [T/Y]; P25205-2 1xPhospho [T/Y]	[K].DGDSYDPYDFSDTEEEMPQVHTPK.[T]	1xPhospho [Y/T]; 1xOxidation [M17]	Used	0	2898.1	66.4	161.2	154.4	60.2	40.1		271.7	96.3	49.7		High	Peak Found	Peak Found	Peak Found	Peak Found	Not Found	High	Peak Found	Peak Found
P25205	R.SEDESETEDEEEKSQEDQEQK.R	[668-688]	P25205 1xPhospho [T674]; P25205-2 1xPhospho [T719]	[R].SEDESETEDEEEKSQEDQEQK.[R]	1xPhospho [T7]	Used	1	2607.96	81.9	67.8	113.9	114.5	136.3	116.3	127.5	75.6	66.1		Peak Found	Peak Found	High	High	Peak Found	Peak Found	Peak Found	Peak Found	Peak Found
P25205	K.TADSQETKESQKVELSESR.L	[725-743]	P25205 1xPhospho [T731]; P25205-2 1xPhospho [T776]	[K].TADSQETKESQKVELSESR.[L]	1xPhospho [T7]	Used	2	2232					110.8	85.4	117.8	222.1	363.8		Not Found	Not Found	Not Found	Not Found	Peak Found	Peak Found	Peak Found	Peak Found	High
P25205	R.SEDESETEDEEEKSQEDQEQKR.K	[668-689]	P25205 1xPhospho [S]; P25205-2 1xPhospho [S]	[R].SEDESETEDEEEKSQEDQEQKR.[K]	1xPhospho [T/S]	Used	2	2764.06	137.9	50.2	110.1	102.6	136.2	122.8	84	77.2	78.9		Peak Found	Peak Found	Peak Found	Peak Found	High	Peak Found	High	Peak Found	Peak Found
P25205	K.DGDSYDPYDFSDTEEEMPQVHTPK.T	[701-724]	P25205 1xPhospho [T/Y]; P25205-2 1xPhospho [T/Y]	[K].DGDSYDPYDFSDTEEEMPQVHTPK.[T]	1xPhospho [S/T/Y]	Used	0	2882.1	14.2	174.4	218.9	53.8	66.3	36.6	257.6	22.2	55.9		Peak Found	High	High	Peak Found	Peak Found	Peak Found	High	Peak Found	High
P25325-2	R.ARSPSVAAMASPQLCR.A	[13-28]	P25325-2 1xPhospho [S]	[R].ARSPSVAAMASPQLCR.[A]	1xCarbamidomethyl [C15]; 1xPhospho [S]; 1xOxidation [M9]	Used	1	1797.81	134.3	120.1	113.4	51.6	61.9	62.2	77.2	119.9	159.3		High	High	High	High	High	High	Peak Found	High	High
P25325-2	R.ARSPSVAAMASPQLCR.A	[13-28]	P25325-2 1xPhospho [S]	[R].ARSPSVAAMASPQLCR.[A]	1xCarbamidomethyl [C15]; 1xPhospho [S]	Used	1	1781.82	68.1	107	138.5	62.1	58.8	42	126.5	132.8	164.2		High	High	High	High	High	Peak Found	High	High	High
P25325-2	R.SPSVAAMASPQLCR.A	[15-28]	P25325-2 1xPhospho [S15]	[R].SPSVAAMASPQLCR.[A]	1xCarbamidomethyl [C13]; 1xPhospho [S1]	Used	0	1554.68		124.6	96.2	102.6	81.3		187.5	162.6	145.2		Not Found	Peak Found	Peak Found	Peak Found	Peak Found	Not Found	Peak Found	Peak Found	High
P25440-1	R.KADTTTPTPTAILAPGSPASPPGSLEPK.A	[282-309]	P25440-4 1xPhospho [S178]; P25440-1 1xPhospho [S298]; P25440-2 1xPhospho [S298]; P25440-3 1xPhospho [S251]	[R].KADTTTPTPTAILAPGSPASPPGSLEPK.[A]	1xPhospho [S17]	Used	1	2782.39	312.3	115.4	90.5	103.4	79.1	85.3	23.3	90.7			High	Peak Found	High	Peak Found	Peak Found	Peak Found	Peak Found	Peak Found	Not Found
P25788-1	K.ESLKEEDESDDDNM.-	[242-255]	P25788-2 1xPhospho [S]; P25788-1 1xPhospho [S]	[K].ESLKEEDESDDDNM.[-]	1xPhospho [S]; 1xOxidation [M14]	Used	1	1751.58	59.3	97.7	128	76.1	98	64.9	125.8	104.3	145.9		High	High	High	High	High	High	High	High	High
P25788-1	K.ESLKEEDESDDDNM.-	[242-255]	P25788-2 1xPhospho [S]; P25788-1 1xPhospho [S]	[K].ESLKEEDESDDDNM.[-]	1xPhospho [S]	Used	1	1735.59	80	230.7	131.1	131.8	94.3	58.7	33.2	79.1	61.1		High	Peak Found	High	High	High	Peak Found	Peak Found	High	Peak Found
P26045	K.GSLAPQDSDSEVSQNR.S	[418-433]	P26045-2 1xPhospho [S294]; P26045-3 1xPhospho [S249]; P26045 1xPhospho [S425]	[K].GSLAPQDSDSEVSQNR.[S]	1xPhospho [S8]	Used	0	1769.73		83.3		205	307.5	235.5	68.7				Not Found	Peak Found	Not Found	Peak Found	High	Peak Found	Peak Found	Not Found	Not Found
P26045	K.SLPSRSPPITPNWR.S	[367-380]	P26045-2 1xPhospho [S239]; P26045 1xPhospho [S370]	[K].SLPSRSPPITPNWR.[S]	1xPhospho [S4]	Used	1	1687.83	140.7	163	68.5	112.3	100.6	101	76.3	73.3	64.2		Peak Found	Peak Found	Peak Found	Peak Found	Peak Found	High	Peak Found	Peak Found	Peak Found
P26045	R.SLSVEHLETK.S	[357-366]	P26045-2 1xPhospho [S228]; P26045 1xPhospho [S359]	[R].SLSVEHLETK.[S]	1xPhospho [S3]	Used	0	1222.57	93.9	67.8	75	193.8	186.2	186.3	46.4	50.5			Peak Found	High	Peak Found	Peak Found	High	Peak Found	Peak Found	Peak Found	Not Found
P26358-1	K.EADDDEEVDDNIPEMPSPKK.M	[698-717]	P26358-3 1xPhospho [S378]; P26358-1 1xPhospho [S714]; P26358-2 1xPhospho [S730]	[K].EADDDEEVDDNIPEMPSPKK.[M]	1xDeamidated [N11]; 1xPhospho [S17]	Not Used	1	2353.93										No Quan Values	Not Found	Not Found	Not Found	Not Found	Not Found	Not Found	High	Not Found	Not Found
P26358-1	R.SKSDGEAKPEPSPSPR.I	[141-156]	P26358-1 1xPhospho [S143]	[R].SKSDGEAKPEPSPSPR.[I]	1xPhospho [S3]	Used	1	1748.79		163.2	232.8	134.5	34.8		65.1	141.3	128.4		Not Found	Peak Found	High	Peak Found	Peak Found	Not Found	Peak Found	Peak Found	Peak Found
P26358-1	K.EADDDEEVDDNIPEMPSPKK.M	[698-717]	P26358-3 1xPhospho [S378]; P26358-1 1xPhospho [S714]; P26358-2 1xPhospho [S730]	[K].EADDDEEVDDNIPEMPSPKK.[M]	1xPhospho [S17]; 1xOxidation [M15]	Used	1	2368.94		126.4	102.7		62.1	52.8	191.5	160.9	203.5		Not Found	High	High	Not Found	Peak Found	Peak Found	High	High	High
P26358-1	K.EADDDEEVDDNIPEMPSPKK.M	[698-717]	P26358-3 1xPhospho [S378]; P26358-1 1xPhospho [S714]; P26358-2 1xPhospho [S730]	[K].EADDDEEVDDNIPEMPSPKK.[M]	1xPhospho [S17]	Used	1	2352.94	8.5	114.6	122.1	51.1	56.8	42.7	188.4	160.7	155.2		High	High	High	Peak Found	High	High	High	High	High
P26358-1	K.EADDDEEVDDNIPEMPSPK.K	[698-716]	P26358-3 1xPhospho [S378]; P26358-1 1xPhospho [S714]; P26358-2 1xPhospho [S730]	[K].EADDDEEVDDNIPEMPSPK.[K]	1xPhospho [S17]	Used	0	2224.85		193.4	139.2	65.2	67.6		188.3	137.4	108.9		Not Found	High	Peak Found	Peak Found	Peak Found	Not Found	High	Peak Found	Peak Found
P26368	K.EEHGGLIRSPR.H	[71-81]	P26368 1xPhospho [S79]; P26368-2 1xPhospho [S79]	[K].EEHGGLIRSPR.[H]	1xPhospho [S9]	Used	1	1330.63	3.3	81.7	71.5	88.4	127.8	70.2	65.4	150.4	241.4		Peak Found	High	Peak Found	High	Peak Found	Peak Found	Peak Found	High	Peak Found
P26368	-.MSDFDEFER.Q	[1-9]	P26368 1xPhospho [S2]; 1xMet-loss+Acetyl [N-Term]; P26368-2 1xPhospho [S2]; 1xMet-loss+Acetyl [N-Term]	[-].MSDFDEFER.[Q]	1xPhospho [S2]; 1xMet-loss+Acetyl [N-Term]	Used	0	1166.4	72.4	101.3	96.7	82.4	109.4	100.8	141.3	100.6	95.2		High	High	High	High	High	High	High	High	High
P26368	R.GAKEEHGGLIRSPR.H	[68-81]	P26368 1xPhospho [S79]; P26368-2 1xPhospho [S79]	[R].GAKEEHGGLIRSPR.[H]	1xPhospho [S12]	Used	2	1586.78	38.3	100.8	104	54.6	134.3	62.3	37.4	149.2	219.1		High	Peak Found	High	Peak Found	High	High	High	High	High
P26373-1	R.GFSLEELR.V	[75-82]	P26373-2 1xPhospho [S77]; P26373-1 1xPhospho [S77]	[R].GFSLEELR.[V]	1xPhospho [S3]	Used	0	1030.46	60.4	255.3	157.8	69.4	59.2		87.4	123.6	86.9		Peak Found	High	Peak Found	Peak Found	Peak Found	Not Found	Peak Found	Peak Found	Peak Found
P26373-1	R.NKSTESLQANVQR.L	[104-116]	P26373-1 1xPhospho [S/T]	[R].NKSTESLQANVQR.[L]	1xPhospho [S/T]	Used	1	1554.73		49.1	49.6	53.5	57.3	59.6	152.5	215.4	262.9		Not Found	High	Peak Found	Peak Found	Peak Found	Peak Found	High	High	High
P26599	K.ELKTDSSPNQAR.A	[135-146]	P26599-2 1xPhospho [S/T]; P26599 1xPhospho [S/T]; P26599-3 1xPhospho [S/T]	[K].ELKTDSSPNQAR.[A]	1xPhospho [S/T]	Used	1	1425.64	77.3	92.8	79.9	76.7	86.9	98.4	114.6	159.7	113.6		High	High	High	High	High	High	High	High	High
P26641	R.TPEFLR.K	[46-51]	P26641 1xPhospho [T46]; P26641-2 1xPhospho [T96]	[R].TPEFLR.[K]	1xPhospho [T1]	Used	0	842.381	104.9	154.9	98.7	76.7	74.3	77.7	113	109.7	90.2		Peak Found	Peak Found	High	Peak Found	Peak Found	Peak Found	Peak Found	Peak Found	High
P26651	R.STSLVEGR.S	[58-65]	P26651 1xPhospho [S60]	[R].STSLVEGR.[S]	1xPhospho [S3]	Used	0	928.414		137.4	79	141.3	110.3	142.8	76.7	119.5	93.1		Not Found	Peak Found	Peak Found	High	Peak Found	Peak Found	Peak Found	Peak Found	Peak Found
P27216-1	K.ASSPQGFDVDRDAK.K	[8-21]	P27216-1 1xPhospho [S10]; P27216-2 1xPhospho [S51]	[K].ASSPQGFDVDRDAK.[K]	1xPhospho [S3]	Used	1	1572.67	4.1			311.2	319.9	264.9					Peak Found	Not Found	Not Found	High	High	High	Not Found	Not Found	Not Found
P27216-1	K.ASSPQGFDVDR.D	[8-18]	P27216-1 1xPhospho [S]; P27216-2 1xPhospho [S]	[K].ASSPQGFDVDR.[D]	1xPhospho [S]	Used	0	1258.51	6.7			357	278.6	257.7					Peak Found	Not Found	Not Found	High	High	High	Not Found	Not Found	Not Found
P27361-1	R.IADPEHDHTGFLTEYVATR.W	[190-208]	P27361-3 1xPhospho [Y/T]; P27361-2 1xPhospho [Y/T]; P27361-1 1xPhospho [Y/T]	[R].IADPEHDHTGFLTEYVATR.[W]	1xPhospho [Y/T]	Used	0	2252	48	107.7	134.3	71.2	59	24.6	155.7	96.4	203		High	High	High	High	High	Peak Found	High	High	High
P27540	R.FARSDDEQSSADKER.L	[74-88]	P27540 1xPhospho [S77]; P27540-4 1xPhospho [S77]; P27540-3 1xPhospho [S68]	[R].FARSDDEQSSADKER.[L]	1xPhospho [S4]	Used	2	1820.74	188.1	116.5	99.4	78.8	69.5	67.4	64.1	99.3	116.8		High	High	High	High	High	Peak Found	Peak Found	Peak Found	High
P27694	R.VTNKSQIR.T	[203-210]	P27694 1xPhospho [T204]	[R].VTNKSQIR.[T]	2xDeamidated [N3; Q6]; 1xPhospho [T2]	Used	1	1027.48	83.8	247.1	154.4	52.6	71.6	76.1	91.9	56.8	65.7		Peak Found	High	High	High	High	High	High	High	High
P27708	R.VLGTSPEAIDSAENR.F	[1034-1048]	P27708 1xPhospho [T/S]	[R].VLGTSPEAIDSAENR.[F]	1xPhospho [T/S]	Used	0	1638.74		271.2	224.9				149.1	148.9	105.9		Not Found	High	High	Not Found	Not Found	Not Found	Peak Found	High	Peak Found
P27708	R.IHRASDPGLPAEEPK.E	[1855-1869]	P27708 1xPhospho [S1859]	[R].IHRASDPGLPAEEPK.[E]	1xPhospho [S5]	Used	1	1696.81	261.1	98.2	146.3	37	35.8	31.3	47.2	103.8	139.3		High	High	High	High	High	High	High	High	High
P27708	R.IHRASDPGLPAEEPKEK.S	[1855-1871]	P27708 1xPhospho [S1859]	[R].IHRASDPGLPAEEPKEK.[S]	1xPhospho [S5]	Used	2	1953.94	90.4	81.8	163.6	27.2	42	25.2	15.8	153.4	300.8		High	High	High	High	Peak Found	Peak Found	Peak Found	High	High
P27708	R.RLSSFVTK.G	[1404-1411]	P27708 1xPhospho [S1406]	[R].RLSSFVTK.[G]	1xPhospho [S3]	Used	1	1017.51	366.8	253.2	202.9	14.8	16.6	16.9	6	9.7	13		High	High	High	Peak Found	Peak Found	Peak Found	Peak Found	Peak Found	Peak Found
P27708	R.ASDPGLPAEEPKEK.S	[1858-1871]	P27708 1xPhospho [S1859]	[R].ASDPGLPAEEPKEK.[S]	1xPhospho [S2]	Used	1	1547.7	155.9	154.6	143.6	32.9	27.4	27.4	119.4	103.6	135.1		High	High	High	Peak Found	Peak Found	Peak Found	High	High	High
P27708	R.ASDPGLPAEEPK.E	[1858-1869]	P27708 1xPhospho [S1859]	[R].ASDPGLPAEEPK.[E]	1xPhospho [S2]	Used	0	1290.56		250	139.8			44.3	192.5	155	118.5		Not Found	Peak Found	Peak Found	Not Found	Not Found	Peak Found	Peak Found	High	High
P27815-1	R.SPLGGPTPVCK.A	[209-219]	P27815-2 1xPhospho [S183]; P27815-6 1xPhospho [S148]; P27815-1 1xPhospho [S209]; P27815-7 1xPhospho [S187]	[R].SPLGGPTPVCK.[A]	1xCarbamidomethyl [C10]; 1xPhospho [S1]	Used	0	1192.54	232.6	212.8	175.7			50.8	96.1	72	59.9		High	High	High	Not Found	Not Found	Peak Found	Peak Found	Peak Found	Peak Found
P27816-1	K.DVTPPPETEVVLIK.N	[519-532]	P27816-1 1xPhospho [T521]; P27816-6 1xPhospho [T521]; P27816-2 1xPhospho [T521]	[K].DVTPPPETEVVLIK.[N]	1xPhospho [T3]	Used	0	1616.82	159.8	115	79.5	124.2	69.3	84.9	64.8	92.2	110.4		High	High	Peak Found	High	Peak Found	Peak Found	Peak Found	Peak Found	Peak Found
P27816-1	R.SKVGSTENIK.H	[937-946]	P27816-1 1xPhospho [T/S]; P27816-5 1xPhospho [T/S]; P27816-6 1xPhospho [T/S]; P27816-2 1xPhospho [T/S]	[R].SKVGSTENIK.[H]	1xPhospho [T/S]	Used	1	1142.55	92.6	100.3	55.6	205.5	151.2	137.3	38.8	61.6	57.2		Peak Found	High	High	High	High	Peak Found	High	High	High
P27816-1	R.SKVGSTENIKHQPGGGR.A	[937-953]	P27816-1 1xPhospho [T/S]; P27816-5 1xPhospho [T/S]; P27816-6 1xPhospho [T/S]; P27816-2 1xPhospho [T/S]	[R].SKVGSTENIKHQPGGGR.[AV]	1xPhospho [T/S]	Used	2	1831.88	81.1	74.2	138	102	204.7	156.5	9.1	54.2	80.2		High	High	High	High	High	High	Peak Found	High	Peak Found
P27816-1	R.LATNTSAPDLK.N	[923-933]	P27816-1 1xPhospho [S928]; P27816-5 1xPhospho [S655]; P27816-4 1xPhospho [S663]; P27816-6 1xPhospho [S928]; P27816-2 1xPhospho [S755]	[R].LATNTSAPDLK.[N]	1xPhospho [S6]	Used	0	1210.57	97			132.6	122.6	357	103.3	36.7	50.8		High	Not Found	Not Found	Peak Found	Peak Found	High	Peak Found	Peak Found	Peak Found
P27816-1	K.VGSLDNVGHLPAGGAVK.T	[1071-1087]	P27816-1 1xPhospho [S1073]; P27816-5 1xPhospho [S731]; P27816-4 1xPhospho [S793]; P27816-6 1xPhospho [S1073]; P27816-2 1xPhospho [S900]	[K].VGSLDNVGHLPAGGAVK.[TI]	1xPhospho [S3]	Used	0	1670.83	56.6	103.8	45.6	189.8	177.6	151.5	49.6	61.8	63.9		Peak Found	High	High	High	High	High	High	High	High
P27816-1	K.VGSTENIKHQPGGGR.A	[939-953]	P27816-1 1xPhospho [S941]; P27816-5 1xPhospho [S668]; P27816-6 1xPhospho [S941]; P27816-2 1xPhospho [S768]	[K].VGSTENIKHQPGGGR.[AV]	1xPhospho [S3]	Used	1	1616.75	49.4	97.3	97.4	160	178.7	145.5	24.9	59.2	87.5		Peak Found	Peak Found	Peak Found	High	High	High	Peak Found	High	High
P27816-1	K.VGSTENIK.H	[939-946]	P27816-1 1xPhospho [S941]; P27816-5 1xPhospho [S668]; P27816-6 1xPhospho [S941]; P27816-2 1xPhospho [S768]	[K].VGSTENIK.[H]	1xPhospho [S3]	Used	0	927.418	91.2	103	53.7	212.6	130.9	142.5	46.8	66	53.3		Peak Found	High	Peak Found	Peak Found	Peak Found	Peak Found	Peak Found	Peak Found	Peak Found
P27816-1	K.DMESPTKLDVTLAK.D	[277-290]	P27816-1 1xPhospho [S/T]; P27816-5 1xPhospho [S/T]; P27816-6 1xPhospho [S/T]; P27816-2 1xPhospho [S/T]	[K].DMESPTKLDVTLAK.[D]	1xPhospho [S/T]; 1xOxidation [M2]	Used	1	1643.76	95.6	228.2	162.4	45.1	38.6	53.5	65.8	107.8	103		High	High	High	High	High	High	High	High	High
P27816-1	K.ETERASPIKMDLAPSK.D; K.ETERASPIKMDLAPSK.D	[353-368]; [379-394]	P27816-1 1xPhospho [S/T]; 1xPhospho [S/T]; P27816-6 1xPhospho [S/T]; 1xPhospho [S/T]; P27816-2 1xPhospho [S/T]; 1xPhospho [S/T]	[K].ETERASPIKMDLAPSK.[D]	1xPhospho [S/T]; 1xOxidation [M10]	Used	2	1868.88	174.2	145.7	114.6	60.1	85.4	85	53.3	81.6	100.2		High	High	High	High	Peak Found	Peak Found	Peak Found	High	High
P27816-1	K.ETERASPIKMDLAPSK.D; K.ETERASPIKMDLAPSK.D	[353-368]; [379-394]	P27816-1 1xPhospho [S/T]; 1xPhospho [S/T]; P27816-6 1xPhospho [S/T]; 1xPhospho [S/T]; P27816-2 1xPhospho [S/T]; 1xPhospho [S/T]	[K].ETERASPIKMDLAPSK.[D]	1xPhospho [S/T]	Used	2	1852.89	132	133.8	156.8	81	90.1	48.6	58.5	101	98.3		High	High	High	High	High	High	High	High	High
P27816-1	K.DMESPTKLDVTLAK.D	[277-290]	P27816-1 1xPhospho [S/T]; P27816-5 1xPhospho [S/T]; P27816-6 1xPhospho [S/T]; P27816-2 1xPhospho [S/T]	[K].DMESPTKLDVTLAK.[D]	1xPhospho [S/T]	Used	1	1627.76	96.2	199	203.3	77.1	41.3	35.3	79.5	90.2	78.1		High	High	High	High	Peak Found	High	High	High	High
P27816-1	K.KCSLPAEEDSVLEK.L	[634-647]	P27816-1 1xPhospho [S636]; P27816-6 1xPhospho [S636]	[K].KCSLPAEEDSVLEK.[L]	1xCarbamidomethyl [C2]; 1xPhospho [S3]	Used	1	1684.75	157.3	212	173	61.1	62	73	52.9	63.9	45		High	High	High	High	Peak Found	Peak Found	Peak Found	Peak Found	Peak Found
P27824	K.QKSDAEEDGGTVSQEEEDR.K	[552-570]	P27824-2 2xPhospho [S589; S599]; P27824-3 2xPhospho [S446; S456]; P27824 2xPhospho [S554; S564]	[K].QKSDAEEDGGTVSQEEEDR.[K]	1xDeamidated [Q1]; 2xPhospho [S3; S13]	Not Used	1	2269.8										No Quan Values	Not Found	Not Found	Not Found	Not Found	High	Not Found	Not Found	Not Found	Not Found
P27824	K.QKSDAEEDGGTVSQEEEDR.K	[552-570]	P27824-2 2xPhospho [T597; S599]; P27824-3 2xPhospho [T454; S456]; P27824 2xPhospho [T562; S564]	[K].QKSDAEEDGGTVSQEEEDR.[K]	2xPhospho [T11; S13]	Used	1	2268.82		87.6	78.4	163.9	222.1	110.4	110.3	83.4	43.8		Not Found	Peak Found	Peak Found	High	Peak Found	Peak Found	Peak Found	High	Peak Found
P27824	K.QKSDAEEDGGTVSQEEEDRKPK.A	[552-573]	P27824-2 2xPhospho [S589; S599]; P27824-3 2xPhospho [S446; S456]; P27824 2xPhospho [S554; S564]	[K].QKSDAEEDGGTVSQEEEDRKPK.[A]	2xPhospho [S3; S13]	Used	2	2622.06	115.8	73.1	85.8	119.7	206.6	107.7	63.5	65.7	62.2		High	High	High	High	High	High	High	High	High
P27824	K.QKSDAEEDGGTVSQEEEDR.K	[552-570]	P27824-2 1xPhospho [T/S]; P27824-3 1xPhospho [T/S]; P27824 1xPhospho [T/S]	[K].QKSDAEEDGGTVSQEEEDR.[K]	1xPhospho [T/S]	Used	1	2188.85	144.6	98.3	89.4	86.8	123.8	92.2	97.3	83.2	84.4		High	High	High	High	High	High	High	High	High
P27824	K.AEEDEILNRSPR.N	[574-585]	P27824-2 1xPhospho [S618]; P27824-3 1xPhospho [S475]; P27824 1xPhospho [S583]	[K].AEEDEILNRSPR.[N]	1xPhospho [S10]	Used	1	1508.67	89.4	79.4	70.8	132.4	118	121.9	98.6	93.1	96.5		High	High	High	High	High	High	High	High	High
P27824	K.SDAEEDGGTVSQEEEDRKPK.A	[554-573]	P27824-2 1xPhospho [S/T]; P27824-3 1xPhospho [S/T]; P27824 1xPhospho [S/T]	[K].SDAEEDGGTVSQEEEDRKPK.[A]	1xPhospho [S/T]	Used	1	2285.94	144.4	77.7	114.6	91.3	131.1	101.4	75.6	70.1	94		High	High	High	High	High	High	High	High	High
P27824	K.QKSDAEEDGGTVSQEEEDRKPK.A	[552-573]	P27824-2 1xPhospho [S/T]; P27824-3 1xPhospho [S/T]; P27824 1xPhospho [S/T]	[K].QKSDAEEDGGTVSQEEEDRKPK.[A]	1xPhospho [S/T]	Used	2	2542.09	117.3	74	150.1	84.3	146.8	97.4	69.7	83.3	77.1		High	High	High	High	High	High	High	High	High
P27824	K.QKSDAEEDGGTVSQEEEDR.K	[552-570]	P27824-2 1xPhospho [S589]; P27824-3 1xPhospho [S446]; P27824 1xPhospho [S554]	[K].QKSDAEEDGGTVSQEEEDR.[K]	1xDeamidated [Q1]; 1xPhospho [S3]	Used	1	2189.84	222.7		311.5	365.8							Peak Found	Not Found	High	Peak Found	Not Found	Not Found	Not Found	Not Found	Not Found
P27824	K.AEEDEILNRSPR.N	[574-585]	P27824-2 1xPhospho [S618]; P27824-3 1xPhospho [S475]; P27824 1xPhospho [S583]	[K].AEEDEILNRSPR.[N]	1xDeamidated [N8]; 1xPhospho [S10]	Used	1	1509.66	95.1	65.2	70.3	133.1	160.7	130.8	64.7	84.8	95.4		Peak Found	High	High	Peak Found	Peak Found	Peak Found	High	Peak Found	High
P28066-1	R.GVNTFSPEGR.L	[11-20]	P28066-1 1xPhospho [S16]	[R].GVNTFSPEGR.[L]	1xPhospho [S6]	Used	0	1143.48		138.1	108	151.6	136.9	137.5	62.2	96.6	69.1		Not Found	High	High	Peak Found	High	High	Peak Found	Peak Found	Peak Found
P28290	R.SQSLPTTLLSPVR.V	[737-749]	P28290 2xPhospho [S739; S746]; P28290-3 2xPhospho [S739; S746]; P28290-2 2xPhospho [S586; S593]	[R].SQSLPTTLLSPVR.[V]	2xPhospho [S3; S10]	Used	0	1558.73	193.7	347.2	232.6	29.1	21	18.5	19.1	20.2	18.6		High	High	High	Peak Found	Peak Found	High	Peak Found	Peak Found	Peak Found
P28290	R.RTGVPSTASVGK.S	[1126-1137]	P28290 1xPhospho [S1134]; P28290-3 1xPhospho [S1134]; P28290-2 1xPhospho [S981]	[R].RTGVPSTASVGK.[S]	1xPhospho [S9]	Used	1	1239.61	327.4	346.9	174.7	26.1				24.9			High	High	Peak Found	Peak Found	Not Found	Not Found	Not Found	Peak Found	Not Found
P28290	R.TPLGASLDEQSSSTLK.G	[87-102]	P28290 1xPhospho [S92]; P28290-3 1xPhospho [S92]	[R].TPLGASLDEQSSSTLK.[G]	1xPhospho [S6]	Used	0	1713.79	93.8	233.2	75.5	174.3	73.3	91.3		84.3	74.3		High	High	Peak Found	Peak Found	High	High	Not Found	Peak Found	Peak Found
P28290	K.SLASIEAK.C	[665-672]	P28290 1xPhospho [S668]; P28290-3 1xPhospho [S668]; P28290-2 1xPhospho [S515]	[K].SLASIEAK.[C]	1xPhospho [S4]	Used	0	898.428	236.4	299.4	121.8	64.3	42.8	52.6	10.8	40.1	32		High	High	High	Peak Found	Peak Found	High	Peak Found	Peak Found	Peak Found
P28290	R.RSQSLPTTLLSPVR.V	[736-749]	P28290 1xPhospho [S737]; P28290-3 1xPhospho [S737]; P28290-2 1xPhospho [S584]	[R].RSQSLPTTLLSPVR.[V]	1xPhospho [S2]	Used	1	1634.86	409.3	209.6	252.9					28.1			High	High	Peak Found	Not Found	Not Found	Not Found	Not Found	Peak Found	Not Found
P28290	R.VVSSVNVRLSPGKETR.C	[750-765]	P28290 1xPhospho [S]; P28290-3 1xPhospho [S]; P28290-2 1xPhospho [S]	[R].VVSSVNVRLSPGKETR.[C]	1xPhospho [S]	Used	2	1807.94	226.6	220.2	303	13.8	17.6	20.7	21.2	34.4	42.5		High	High	High	Peak Found	Peak Found	Peak Found	Peak Found	Peak Found	Peak Found
P28290	R.TGSVQTPPDLESSEEVDAAEGAPEVVGPK.S	[1163-1191]	P28290 1xPhospho [S/T]; P28290-3 1xPhospho [S/T]; P28290-2 1xPhospho [S/T]	[R].TGSVQTPPDLESSEEVDAAEGAPEVVGPK.[S]	1xPhospho [S/T]	Used	0	2975.34	153.4	343.7	310.2	60.2			15.8		16.7		High	High	High	Peak Found	Not Found	Not Found	Peak Found	Not Found	Peak Found
P28290	R.SQSLPTTLLSPVR.V	[737-749]	P28290 1xPhospho [S/T]; P28290-3 1xPhospho [S/T]; P28290-2 1xPhospho [S/T]	[R].SQSLPTTLLSPVR.[V]	1xPhospho [S/T]	Used	0	1478.76	205.3	292.3	212.1	38.4	33.1	38.2	15.6	36.4	28.6		High	High	High	High	High	High	High	High	High
P28290	R.TGVPSTASVGK.S	[1127-1137]	P28290 1xPhospho [S/T]; P28290-3 1xPhospho [S/T]; P28290-2 1xPhospho [S/T]	[R].TGVPSTASVGK.[S]	1xPhospho [S/T]	Used	0	1083.51	296.7	326.8	148.5	40.2		35.8		27.1	24.8		High	Peak Found	High	Peak Found	Not Found	Peak Found	Not Found	Peak Found	Peak Found
P28290	K.SGSQDFPQCNTIENTGTK.Q	[591-608]	P28290 1xPhospho [S]; P28290-3 1xPhospho [S]; P28290-2 1xPhospho [S]	[K].SGSQDFPQCNTIENTGTK.[Q]	1xCarbamidomethyl [C9]; 1xPhospho [S]	Used	0	2063.84	64	501.7	234.3	21.2				62.2	16.6		Peak Found	High	High	Peak Found	Not Found	Not Found	Not Found	Peak Found	Peak Found
P28290	K.ETRCSPPSFTYK.Y	[763-774]	P28290 1xPhospho [T764]; P28290-3 1xPhospho [T764]; P28290-2 1xPhospho [T611]	[K].ETRCSPPSFTYK.[Y]	1xCarbamidomethyl [C4]; 1xPhospho [T2]	Used	1	1552.65	229.8	257.3	214		47.8	35.5		54	61.5		High	Peak Found	High	Not Found	Peak Found	Peak Found	Not Found	Peak Found	Peak Found
P28290	R.CSPPSFTYK.Y	[766-774]	P28290 1xPhospho [S767]; P28290-3 1xPhospho [S767]; P28290-2 1xPhospho [S614]	[R].CSPPSFTYK.[Y]	1xCarbamidomethyl [C1]; 1xPhospho [S2]	Used	0	1166.46	67	123.4	136.7	103.1	97	147.3	77.3	67.4	80.9		Peak Found	High	Peak Found	Peak Found	Peak Found	Peak Found	Peak Found	Peak Found	Peak Found
P28290	K.SVHISTPEKEPCAPLTIPSIR.N	[437-457]	P28290 1xPhospho [T/S]; P28290-3 1xPhospho [T/S]; P28290-2 1xPhospho [T/S]	[K].SVHISTPEKEPCAPLTIPSIR.[N]	1xCarbamidomethyl [C12]; 1xPhospho [T/S]	Used	1	2412.2	170.4	212.4	154.9	43.4	58.1	39.1	61	80.2	80.5		High	Peak Found	High	Peak Found	Peak Found	Peak Found	High	High	Peak Found
P28290	K.RKSGSQDFPQCNTIENTGTK.Q	[589-608]	P28290 1xPhospho [S593]; P28290-3 1xPhospho [S593]; P28290-2 1xPhospho [S440]	[K].RKSGSQDFPQCNTIENTGTK.[Q]	1xCarbamidomethyl [C11]; 1xPhospho [S5]	Used	2	2348.03	388.4	214.4	297.2								High	Peak Found	Peak Found	Not Found	Not Found	Not Found	Not Found	Not Found	Not Found
P28290	R.KSGSQDFPQCNTIENTGTK.Q	[590-608]	P28290 1xPhospho [S]; P28290-3 1xPhospho [S]; P28290-2 1xPhospho [S]	[R].KSGSQDFPQCNTIENTGTK.[Q]	1xCarbamidomethyl [C10]; 1xPhospho [S]	Used	1	2191.93	239.1	264.1	141.8	75.8	58.2	35.8		46.8	38.3		High	Peak Found	High	High	Peak Found	Peak Found	Not Found	Peak Found	Peak Found
P28290	R.TLSTHSVPNISGATCSAFASPFGCPYSHR.H	[864-892]	P28290 1xPhospho [T864]; P28290-3 1xPhospho [T864]; P28290-2 1xPhospho [T711]	[R].TLSTHSVPNISGATCSAFASPFGCPYSHR.[H]	2xCarbamidomethyl [C15; C24]; 1xPhospho [T1]	Used	0	3189.39		415.7	484.3								Not Found	Peak Found	High	Not Found	Not Found	Not Found	Not Found	Not Found	Not Found
P28290	R.NGGSFEDDLSLGAEANHLHESDAQIENCNNILAK.E	[108-141]	P28290 1xPhospho [S111]; P28290-3 1xPhospho [S111]	[R].NGGSFEDDLSLGAEANHLHESDAQIENCNNILAK.[E]	1xCarbamidomethyl [C28]; 1xDeamidated [N1]; 1xPhospho [S4]	Used	0	3763.62		900									Not Found	High	Not Found	Not Found	Not Found	Not Found	Not Found	Not Found	Not Found
P28360	R.RLSPPACTLRK.H	[158-168]	P28360 1xPhospho [S160]	[R].RLSPPACTLRK.[H]	1xCarbamidomethyl [C7]; 1xPhospho [S3]	Used	2	1378.7	695.9			204.1							High	Not Found	Not Found	Peak Found	Not Found	Not Found	Not Found	Not Found	Not Found
P28482	R.VADPDHDHTGFLTEYVATR.W	[173-191]	P28482-2 1xPhospho [Y187]; P28482 1xPhospho [Y187]	[R].VADPDHDHTGFLTEYVATR.[W]	1xPhospho [Y15]	Used	0	2223.97	25.1	128.7	189.2	29	32.8	11.4	137.8	95	251		High	High	High	Peak Found	High	Peak Found	High	High	High
P28715-1	K.LKTEKEPDATPPSPR.T	[329-343]	P28715-1 1xPhospho [S341]	[K].LKTEKEPDATPPSPR.[T]	1xPhospho [S13]	Used	2	1745.85	56.3	34	48.5	78.1	134.7	97.2	109	145	197.2		Peak Found	Peak Found	Peak Found	Peak Found	High	High	Peak Found	High	High
P28715-1	R.NAPAAVDEGSISPR.T	[373-386]	P28715-1 1xPhospho [S]	[R].NAPAAVDEGSISPR.[T]	1xPhospho [S]	Used	0	1463.65		42.2	37.7	117.1	88.9	109.8	198.2	156.4	149.5		Not Found	High	Peak Found	High	Peak Found	Peak Found	High	High	High
P28715-1	R.ELTPASPTCTNSVSK.N	[521-535]	P28715-1 1xPhospho [S/T]	[R].ELTPASPTCTNSVSK.[N]	1xCarbamidomethyl [C9]; 1xPhospho [S/T]	Used	0	1671.73	35.7	42.4	23.4	131.9	86.2	92	178.9	169.2	140.3		Peak Found	Peak Found	Peak Found	Peak Found	High	High	High	Peak Found	High
P29317	R.LPSTSGSEGVPFR.T	[895-907]	P29317 2xPhospho [T/S]	[R].LPSTSGSEGVPFR.[T]	2xPhospho [T/S]	Used	0	1493.61	192.4	221.5	183.6	8	41.6	23.7	102.8	56.3	70.2		High	High	High	Peak Found	Peak Found	Peak Found	High	Peak Found	High
P29317	R.VSIRLPSTSGSEGVPFR.T	[891-907]	P29317 2xPhospho [S899; S901]	[R].VSIRLPSTSGSEGVPFR.[T]	2xPhospho [S9; S11]	Used	1	1948.89		270.5	272.7			34.1	188.1	46.4	88.2		Not Found	High	Peak Found	Not Found	Not Found	Peak Found	Peak Found	Peak Found	Peak Found
P29317	R.VLEDDPEATYTTSGGK.I	[763-778]	P29317 1xPhospho [Y/T/S]	[R].VLEDDPEATYTTSGGK.[I]	1xPhospho [Y/T/S]	Used	0	1762.74	132.5	134.4	121.3	16.8	26.8	19.9	82.3	192.7	173.3		High	High	Peak Found	Peak Found	High	High	Peak Found	High	High
P29317	R.LPSTSGSEGVPFR.T	[895-907]	P29317 1xPhospho [S]	[R].LPSTSGSEGVPFR.[T]	1xPhospho [S]	Used	0	1413.64	98.5	150.2	167.9	43.2	47.5	60.2	112.4	108.3	111.9		High	High	High	High	High	High	High	High	High
P29317	R.VLEDDPEATYTTSGGKIPIR.W	[763-782]	P29317 1xPhospho [Y/T]	[R].VLEDDPEATYTTSGGKIPIR.[W]	1xPhospho [S/Y/T]	Used	1	2242.06	51.1	102.8	163.8		21	22.6	73.9	208.8	256.1		Peak Found	High	Peak Found	Not Found	Peak Found	Peak Found	High	High	High
P29317	R.VSIRLPSTSGSEGVPFR.T	[891-907]	P29317 1xPhospho [S/T]	[R].VSIRLPSTSGSEGVPFR.[T]	1xPhospho [S/T]	Used	1	1868.93	55.8	125	143.7	32.7	41.3	54	64.7	159.3	223.5		High	High	Peak Found	Peak Found	Peak Found	Peak Found	High	High	Peak Found
P29323	R.FLEDDTSDPTYTSALGGK.I	[770-787]	P29323-2 1xPhospho [S776]; P29323-3 1xPhospho [S777]; P29323 1xPhospho [S776]	[R].FLEDDTSDPTYTSALGGK.[I]	1xPhospho [S7]	Used	0	1996.84	43.5	66.4	50.5	50.8	49.1		224	226.2	189.6		Peak Found	Peak Found	Peak Found	Peak Found	Peak Found	Not Found	High	Peak Found	Peak Found
P29353	R.ELFDDPSYVNVQNLDK.A	[420-435]	P29353 1xPhospho [S426]; P29353-5 1xPhospho [S212]; P29353-2 1xPhospho [S316]; P29353-3 1xPhospho [S271]; P29353-7 1xPhospho [S317]; P29353-6 1xPhospho [S427]	[R].ELFDDPSYVNVQNLDK.[A]	1xPhospho [S7]	Used	0	1975.87	81.1	86.6	53.6	62.5	69.3	73.6	209.5	134.4	129.5		Peak Found	Peak Found	Peak Found	Peak Found	Peak Found	Peak Found	Peak Found	High	High
P29353	R.HGSFVNKPTR.G	[137-146]	P29353 1xPhospho [S139]; P29353-2 1xPhospho [S29]; P29353-7 1xPhospho [S29]; P29353-6 1xPhospho [S139]	[R].HGSFVNKPTR.[G]	1xPhospho [S3]	Used	0	1222.57		78.2	128.6	110.1	110.4	119	72.6	121.9	159.2		Not Found	High	High	High	High	High	High	High	High
P29374-1	K.ILGQSSPEKK.I	[859-868]	P29374-2 1xPhospho [S]; P29374-3 1xPhospho [S]; P29374-1 1xPhospho [S]	[K].ILGQSSPEKK.[I]	1xPhospho [S]	Used	1	1166.58	82.8	77.9	62.9	97.3	101.9	95.1	120.3	129.2	132.7		High	Peak Found	Peak Found	High	Peak Found	Peak Found	Peak Found	Peak Found	Peak Found
P29375-1	K.EKVEPEVLSTDTQTSPEPGTR.M	[190-210]	P29375-2 1xPhospho [T/S]; P29375-1 1xPhospho [T/S]	[K].EKVEPEVLSTDTQTSPEPGTR.[M]	1xPhospho [T/S]	Used	1	2380.09	62.8	89.6	67.1	80.2	91	68.8	152.3	155.6	132.6		Peak Found	Peak Found	Peak Found	High	Peak Found	Peak Found	High	Peak Found	High
P29375-1	R.VVSSVSSSPR.Q	[1324-1333]	P29375-2 1xPhospho [S1331]; P29375-1 1xPhospho [S1331]	[R].VVSSVSSSPR.[Q]	1xPhospho [S8]	Used	0	1084.5	63.5	81.6	70.8	95.3	91	113.1	90.3	154.9	139.5		Peak Found	High	Peak Found	High	Peak Found	High	Peak Found	High	Peak Found
P29590	R.LARSSPEQPRPSTSK.A	[501-515]	P29590-5 1xPhospho [S504]; P29590-3 1xPhospho [S504]; P29590-13 1xPhospho [S456]; P29590-12 1xPhospho [S456]; P29590-2 1xPhospho [S504]; P29590-4 1xPhospho [S504]; P29590-9 1xPhospho [S504]; P29590-8 1xPhospho [S504]; P29590 1xPhospho [S504]; P29590-3 1xPhospho [S504]; P29590-11 1xPhospho [S456]	[R].LARSSPEQPRPSTSK.[A]	1xPhospho [S4]	Used	1	1720.84		92.1	180.1	90.2	76	96.5	64.1	133.1	167.9		Not Found	Peak Found	High	Peak Found	Peak Found	Peak Found	Peak Found	Peak Found	High
P29590	K.KASPEAASTPRDPIDVDLPEEAER.V	[401-424]	P29590-5 1xPhospho [S403]; P29590-3 1xPhospho [S403]; P29590-2 1xPhospho [S403]; P29590-4 1xPhospho [S403]; P29590-9 1xPhospho [S403]; P29590-8 1xPhospho [S403]; P29590 1xPhospho [S403]; P29590-3 1xPhospho [S403]	[K].KASPEAASTPRDPIDVDLPEEAER.[V]	1xPhospho [S3]	Used	2	2673.24	72.8	91.8	49.7	128.1	93.4	86.8	149.3	110.3	117.9		Peak Found	Peak Found	Peak Found	High	High	Peak Found	Peak Found	Peak Found	Peak Found
P29590	K.KASPEAASTPR.D	[401-411]	P29590-5 1xPhospho [S403]; P29590-3 1xPhospho [S403]; P29590-13 1xPhospho [S403]; P29590-12 1xPhospho [S403]; P29590-2 1xPhospho [S403]; P29590-14 1xPhospho [S403]; P29590-4 1xPhospho [S403]; P29590-10 1xPhospho [S403]; P29590-9 1xPhospho [S403]; P29590-8 1xPhospho [S403]; P29590 1xPhospho [S403]; P29590-3 1xPhospho [S403]; P29590-11 1xPhospho [S403]	[K].KASPEAASTPR.[D]	1xPhospho [S3]	Used	1	1194.55	44.3	88.7	24.7	199.5	146.3	114.3	26.9	178.8	76.3		Peak Found	High	Peak Found	High	High	Peak Found	Peak Found	High	Peak Found
P29590	R.SSPEQPRPSTSK.A	[504-515]	P29590-5 1xPhospho [S]; P29590-3 1xPhospho [S]; P29590-13 1xPhospho [S]; P29590-12 1xPhospho [S]; P29590-2 1xPhospho [S]; P29590-4 1xPhospho [S]; P29590-9 1xPhospho [S]; P29590-8 1xPhospho [S]; P29590 1xPhospho [S]; P29590-3 1xPhospho [S]; P29590-11 1xPhospho [S]	[R].SSPEQPRPSTSK.[A]	1xPhospho [S]	Used	0	1380.62	73	127.2	73	127.8	69	75.3	94.2	136.4	124.1		High	High	High	High	High	High	High	High	High
P29692	K.KPATPAEDDEDDDIDLFGSDNEEEDKEAAQLREER.L	[144-178]	P29692 1xPhospho [S162]; P29692-4 1xPhospho [S143]; P29692-2 1xPhospho [S528]; P29692-3 1xPhospho [S138]	[K].KPATPAEDDEDDDIDLFGSDNEEEDKEAAQLREER.[L]	1xDeamidated [N21]; 1xPhospho [S19]	Not Used	2	4072.69										No Quan Values	Not Found	Not Found	Not Found	Not Found	High	Not Found	Not Found	Not Found	Not Found
P29692	K.KPATPAEDDEDDDIDLFGSDNEEEDKEAAQLREER.L	[144-178]	P29692 1xPhospho [S162]; P29692-4 1xPhospho [S143]; P29692-2 1xPhospho [S528]; P29692-3 1xPhospho [S138]	[K].KPATPAEDDEDDDIDLFGSDNEEEDKEAAQLREER.[L]	1xPhospho [S19]	Used	2	4071.71	133.5	182.7	128.9	56.5	143.9	40.4	137.1		77.1		High	High	High	High	High	High	High	Not Found	High
P29692	K.KPATPAEDDEDDDIDLFGSDNEEEDKEAAQLR.E	[144-175]	P29692 1xPhospho [S162]; P29692-4 1xPhospho [S143]; P29692-2 1xPhospho [S528]; P29692-3 1xPhospho [S138]	[K].KPATPAEDDEDDDIDLFGSDNEEEDKEAAQLR.[E]	1xPhospho [S19]	Used	1	3657.52	174.6	176.4	115.2	109.4	106.4	35.7	120.5	8.9	52.9		High	High	High	High	High	Peak Found	High	Peak Found	High
P29692	R.ATAPQTQHVSPMR.Q	[124-136]	P29692 1xPhospho [S133]; P29692-4 1xPhospho [S114]; P29692-2 1xPhospho [S499]; P29692-3 1xPhospho [S109]	[R].ATAPQTQHVSPMR.[Q]	1xPhospho [S10]	Used	0	1503.68	106.2	213.8	212.3	64	4	3.8	61.5	131.4	102.9		Peak Found	High	High	High	Peak Found	Peak Found	Peak Found	High	Peak Found
P29692	R.LNVLEKSSPGHR.A	[112-123]	P29692 1xPhospho [S]; P29692-4 1xPhospho [S]; P29692-2 1xPhospho [S]; P29692-3 1xPhospho [S]	[R].LNVLEKSSPGHR.[A]	1xPhospho [S]	Used	1	1416.7	51	53.6	162.7	56	101.2	122.9	49.6	135.3	167.7		High	High	High	High	High	High	High	High	High
P29692	K.KPATPAEDDEDDDIDLFGSDNEEEDKEAAQLR.E	[144-175]	P29692 1xPhospho [S162]; P29692-4 1xPhospho [S143]; P29692-2 1xPhospho [S528]; P29692-3 1xPhospho [S138]	[K].KPATPAEDDEDDDIDLFGSDNEEEDKEAAQLR.[E]	1xDeamidated [N21]; 1xPhospho [S19]	Used	1	3658.51	19.3				860.5	20.2					Peak Found	High	Not Found	Not Found	High	Peak Found	Not Found	Not Found	Not Found
P29966	K.AEDGATPSPSNETPKKK.K	[138-154]	P29966 1xPhospho [T150]	[K].AEDGATPSPSNETPKKK.[K]	1xPhospho [T13]	Used	2	1836.84	35.4	36.6	47	192.9	238.9	186.7	44.9	48.8	68.9		High	High	High	High	High	High	High	High	High
P29966	K.AEDGATPSPSNETPKK.K	[138-153]	P29966 1xPhospho [T/S]	[K].AEDGATPSPSNETPKK.[K]	1xPhospho [T/S]	Used	1	1708.74	52.4	45.6	46.7	210.5	202.1	183.3	49.6	52.1	57.7		Peak Found	High	High	High	High	High	High	High	High
P29966	K.VNGDASPAAAESGAK.E	[41-55]	P29966 1xPhospho [S46]	[K].VNGDASPAAAESGAK.[E]	1xPhospho [S6]	Used	0	1424.61		74.5	40.4	283.5	134.4	102.4	100.2	164.5			Not Found	Peak Found	Peak Found	High	Peak Found	Peak Found	Peak Found	Peak Found	Not Found
P29966	K.LSGFSFKK.N	[166-173]	P29966 1xPhospho [S170]	[K].LSGFSFKK.[N]	1xPhospho [S5]	Used	1	993.481	62.7	76.3	60.9	78.9	155.5	224	38.7	95.2	107.7		High	High	High	Peak Found	High	High	High	Peak Found	High
P29966	K.GEAAAERPGEAAVASSPSK.A	[12-30]	P29966 1xPhospho [S]	[K].GEAAAERPGEAAVASSPSK.[A]	1xPhospho [S]	Used	0	1864.84	121.9	18.3	44.6	225.8	143.3	83.5	85.6	89	88		High	Peak Found	Peak Found	Peak Found	High	Peak Found	Peak Found	High	Peak Found
P29966	K.AEDGATPSPSNETPK.K	[138-152]	P29966 1xPhospho [S/T]	[K].AEDGATPSPSNETPK.[K]	1xPhospho [S/T]	Used	0	1580.65	16.9	19.3	19	267.3	106.1	178.3	74.6	83	135.3		High	High	Peak Found	High	High	High	High	High	Peak Found
P29966	K.EAPAEGEAAEPGSPTAAEGEAASAASSTSSPK.A	[106-137]	P29966 1xPhospho [S/T]	[K].EAPAEGEAAEPGSPTAAEGEAASAASSTSSPK.[A]	1xPhospho [S/T]	Used	0	2995.27	120.1	140.5	150	145.5	27.3	52.2	106.1	76.9	81.4		High	High	Peak Found	High	Peak Found	Peak Found	High	Peak Found	High
P29966	K.AEDGATPSPSNETPK.K	[138-152]	P29966 1xPhospho [T150]	[K].AEDGATPSPSNETPK.[K]	1xDeamidated [N11]; 1xPhospho [T13]	Used	0	1581.63			114.3	197.1	224.4	254.6			109.7		Not Found	Not Found	Peak Found	High	Peak Found	Peak Found	Not Found	Not Found	Peak Found
P30086	K.NRPTSISWDGLDSGK.L	[48-62]	P30086 1xPhospho [T/S]	[K].NRPTSISWDGLDSGK.[L]	1xPhospho [T/S]	Used	0	1712.76	118.7	138.3	77	165.9	148.8	149.1	22.6	44.1	35.5		High	High	High	High	High	High	Peak Found	Peak Found	Peak Found
P30291-1	R.SPRPDHPGTPPHK.T	[165-177]	P30291-1 2xPhospho [S165; T173]	[R].SPRPDHPGTPPHK.[T]	2xPhospho [S1; T9]	Used	0	1582.66	97.1	98.9	77.5	93.9	157	130	67.7	88.3	89.6		Peak Found	High	High	Peak Found	High	High	High	High	Peak Found
P30414	R.SRSSSYDPHSR.S	[1388-1398]	P30414 1xPhospho [S1388]	[R].SRSSSYDPHSR.[S]	1xPhospho [S1]	Used	1	1358.55	30.5	126.2	77.8	161.8	177.7	147.7	39.8	138.4			Peak Found	Peak Found	Peak Found	Peak Found	High	Peak Found	Peak Found	Peak Found	Not Found
P30414	K.GDKLSDPCSSR.W	[386-396]	P30414 1xPhospho [S390]	[K].GDKLSDPCSSR.[W]	1xCarbamidomethyl [C8]; 1xPhospho [S5]	Used	1	1301.52	103.3	49.2	97.7	49.5	40.3	41.2	150.6	200.5	167.6		Peak Found	High	Peak Found	Peak Found	Peak Found	Peak Found	High	High	High
P30419	R.GGLSPANDTGAK.K	[44-55]	P30419 1xPhospho [S47]	[R].GGLSPANDTGAK.[K]	1xPhospho [S4]	Used	0	1167.5	91.5	113	103.8	102.8	68.5	89	113.5	130.1	87.8		High	High	High	High	High	High	High	High	High
P30419	R.GGLSPANDTGAKK.K	[44-56]	P30419 1xPhospho [S47]	[R].GGLSPANDTGAKK.[K]	1xPhospho [S4]	Used	1	1295.6	92	127.6	134.7		70.8	114.8	112	144.9	103.3		Peak Found	High	High	Not Found	Peak Found	Peak Found	Peak Found	Peak Found	Peak Found
P30419	K.EKGSETDSAQDQPVK.M	[66-80]	P30419 1xPhospho [S/T]	[K].EKGSETDSAQDQPVK.[M]	1xPhospho [S/T]	Used	1	1698.72	153.9	141.8	97.2	82.6	80.6	55.3		113.5	175.1		Peak Found	High	High	Peak Found	Peak Found	Peak Found	Not Found	High	High
P30419	R.GGLSPANDTGAK.K	[44-55]	P30419 1xPhospho [S47]	[R].GGLSPANDTGAK.[K]	1xDeamidated [N7]; 1xPhospho [S4]	Used	0	1168.49	87.7	122.6	94.2	24.8	71	80.3	144.7	164.1	110.5		Peak Found	High	Peak Found	Peak Found	High	High	High	High	Peak Found
P30566	-.MAAGGDHGSPDSYR.S	[1-14]	P30566-2 1xPhospho [S9]; 1xMet-loss+Acetyl [N-Term]; P30566 1xPhospho [S9]; 1xMet-loss+Acetyl [N-Term]	[-].MAAGGDHGSPDSYR.[S]	1xPhospho [S9]; 1xMet-loss+Acetyl [N-Term]	Used	0	1411.53	76.3	106	90	60.1	59.7	61.4	156.3	151.4	138.8		High	High	High	High	Peak Found	High	High	High	High
P30566	-.MAAGGDHGSPDSYRSPLASR.Y	[1-20]	P30566-2 1xPhospho [S/Y]; 1xMet-loss+Acetyl [N-Term]; P30566 1xPhospho [S/Y]; 1xMet-loss+Acetyl [N-Term]	[-].MAAGGDHGSPDSYRSPLASR.[Y]	1xPhospho [S/Y]; 1xMet-loss+Acetyl [N-Term]	Used	1	2022.87	72.3	99.6	115.1	47.2	54.7	71.5	135	144.5	160		High	Peak Found	High	Peak Found	High	Peak Found	Peak Found	High	High
P30989	R.KADSVSSNHTLSSNATR.E	[398-414]	P30989 2xPhospho [S403; S404]	[R].KADSVSSNHTLSSNATR.[E]	2xPhospho [S6; S7]	Used	1	1934.8	465.8	161	107.9	49.2	86.3		29.8				High	High	Peak Found	Peak Found	Peak Found	Not Found	Peak Found	Not Found	Not Found
P30989	R.KADSVSSNHTLSSNATR.E	[398-414]	P30989 1xPhospho [S]	[R].KADSVSSNHTLSSNATR.[E]	1xPhospho [S]	Used	1	1854.83	345.6	233.9	151.4	44.5	61.1		10.9	23.1	29.4		High	High	Peak Found	Peak Found	Peak Found	Not Found	Peak Found	Peak Found	Peak Found
P30989	R.KADSVSSNHTLSSNATR.E	[398-414]	P30989 1xPhospho [S401]	[R].KADSVSSNHTLSSNATR.[E]	1xDeamidated [N8]; 1xPhospho [S4]	Used	1	1855.82	900										High	Not Found	Not Found	Not Found	Not Found	Not Found	Not Found	Not Found	Not Found
P31321	K.SNSQSDSHDEEVSPTPPNPVVK.A	[71-92]	P31321 1xPhospho [S]	[K].SNSQSDSHDEEVSPTPPNPVVK.[A]	1xPhospho [S]	Used	0	2430.05	37.1	36.9	38.2	54.2	50.2	46.8	246.8	171.6	218.2		High	Peak Found	High	Peak Found	Peak Found	Peak Found	High	High	High
P31350-1	R.VPLAPITDPQQLQLSPLK.G	[6-23]	P31350-2 1xPhospho [S/T]; P31350-1 1xPhospho [S/T]	[R].VPLAPITDPQQLQLSPLK.[G]	1xPhospho [S/T]	Used	0	2038.1	42.5	18.4	32.7	275.2	122.5	218.4		96.1	94.2		Peak Found	Peak Found	Peak Found	High	High	High	Not Found	High	High
P31749	R.SGSPSDNSGAEEMEVSLAKPK.H	[122-142]	P31749-2 1xPhospho [S62]; P31749 1xPhospho [S124]	[R].SGSPSDNSGAEEMEVSLAKPK.[H]	1xPhospho [S3]; 1xOxidation [M13]	Used	0	2215.94	108	132.8	121.8	52.3	76.2	94.3	75.1	108.4	131		Peak Found	Peak Found	Peak Found	Peak Found	Peak Found	Peak Found	Peak Found	Peak Found	High
P31749	R.SGSPSDNSGAEEMEVSLAKPK.H	[122-142]	P31749-2 1xPhospho [S]; P31749 1xPhospho [S]	[R].SGSPSDNSGAEEMEVSLAKPK.[H]	1xPhospho [S]	Used	0	2199.95	57.1	150.1	151.4	72.3	90.9	75.6	88.3	89.3	124.9		High	High	High	High	High	Peak Found	High	Peak Found	High
P31943	K.HTGPNSPDTANDGFVR.L	[99-114]	P31943 1xPhospho [S/T]; P55795 1xPhospho [S/T]	[K].HTGPNSPDTANDGFVR.[L]	1xPhospho [S/T]	Used	0	1764.73	108.4	87.4	83.2	60.2	66.1	68.3	135.8	139.5	151.1		High	High	High	High	High	High	High	High	High
P31943	K.HTGPNSPDTANDGFVR.L	[99-114]	P31943 1xPhospho [S/T]; P55795 1xPhospho [S/T]	[K].HTGPNSPDTANDGFVR.[L]	1xDeamidated [N]; 1xPhospho [S/T]	Used	0	1765.72	173.5	72	86.1	66.8	65.8	69.8	89.3	137.9	138.8		High	High	High	Peak Found	High	Peak Found	High	High	High
P31949	K.ISSPTETER.C	[4-12]	P31949 1xPhospho [S6]	[K].ISSPTETER.[C]	1xPhospho [S3]	Used	0	1099.47		59.5	41.7	171.1	138.6	165.1	89	132.9	102.3		Not Found	High	Peak Found	High	High	Peak Found	High	High	Peak Found
P32519-1	R.KTKPPRPDSPATTPNISVK.K	[179-197]	P32519-1 1xPhospho [T/S]; P32519-2 1xPhospho [T/S]	[R].KTKPPRPDSPATTPNISVK.[K]	1xPhospho [T/S]	Used	1	2114.1	204.7		43.4	97.9	218.1	153.8		73.4	108.7		Peak Found	Not Found	Peak Found	High	High	Peak Found	Not Found	Peak Found	High
P32519-1	K.YADSPGASSPEQPK.R	[160-173]	P32519-1 1xPhospho [S]; P32519-2 1xPhospho [S]	[K].YADSPGASSPEQPK.[R]	1xPhospho [S]	Used	0	1513.62		54.4	53.5	131.1	98.7	120.1	162.2	154.6	125.3		Not Found	High	High	High	Peak Found	Peak Found	High	High	High
P32519-1	K.YADSPGASSPEQPKR.K	[160-174]	P32519-1 1xPhospho [S]; P32519-2 1xPhospho [S]	[K].YADSPGASSPEQPKR.[K]	1xPhospho [S]	Used	1	1669.72	14.9	42.3	49.5	110	162.8	147.3	113.6	126.6	133.1		Peak Found	Peak Found	High	High	Peak Found	High	High	High	High
P32519-1	K.TKPPRPDSPATTPNISVK.K	[180-197]	P32519-1 1xPhospho [S/T]; P32519-2 1xPhospho [S/T]	[K].TKPPRPDSPATTPNISVK.[K]	1xPhospho [S/T]	Used	0	1986.01	71.8	36.1	48.6	143.3	224.4	151.7	23.6	89.2	111.2		High	Peak Found	Peak Found	High	High	High	Peak Found	Peak Found	High
P33527	R.QLSSSSSYSGDISR.H	[913-926]	P33527-6 1xPhospho [S856]; P33527-8 1xPhospho [S800]; P33527-9 1xPhospho [S925]; P33527-3 1xPhospho [S859]; P33527 1xPhospho [S915]; P33527-2 1xPhospho [S856]; P33527-7 1xPhospho [S859]; P33527-5 1xPhospho [S800]; P33527-4 1xPhospho [S915]	[R].QLSSSSSYSGDISR.[H]	1xPhospho [S3]	Used	0	1553.65	88.6	114.9	99.6	97.6	110.1	113.2	77.6	102.8	95.7		High	Peak Found	High	High	Peak Found	Peak Found	Peak Found	Peak Found	Peak Found
P33991	R.IAEPSVCGR.C	[322-330]	P33991 1xPhospho [S326]	[R].IAEPSVCGR.[C]	1xCarbamidomethyl [C7]; 1xPhospho [S5]	Used	0	1068.45	73	82.4	95.9	81.6	82.9	86.5	130.2	140.9	126.7		Peak Found	High	High	Peak Found	Peak Found	Peak Found	High	High	Peak Found
P35221	R.SRTSVQTEDDQLIAGQSAR.A	[652-670]	P26232-3 2xPhospho [S/T]; P35221-3 2xPhospho [S/T]; P26232-6 2xPhospho [S/T]; P35221 2xPhospho [S/T]; P26232 2xPhospho [S/T]; P26232-2 2xPhospho [S/T]; P26232-4 2xPhospho [S/T]; P26232-5 2xPhospho [S/T]; P35221-2 2xPhospho [S/T]	[R].SRTSVQTEDDQLIAGQSAR.[A]	2xPhospho [S/T]	Used	1	2221.95	22.5	146.7	111.9	171.9	173.2	94.1	74.9	89.9	15		Peak Found	Peak Found	Peak Found	High	High	Peak Found	Peak Found	Peak Found	Peak Found
P35221	R.TSVQTEDDQLIAGQSAR.A	[654-670]	P26232-3 1xPhospho [T/S]; P35221-3 1xPhospho [T/S]; P26232-6 1xPhospho [T/S]; P35221 1xPhospho [T/S]; P26232 1xPhospho [T/S]; P26232-2 1xPhospho [T/S]; P26232-4 1xPhospho [T/S]; P26232-5 1xPhospho [T/S]; P35221-2 1xPhospho [T/S]	[R].TSVQTEDDQLIAGQSAR.[A]	1xPhospho [T/S]	Used	0	1898.85		120.2	52.7	193.8	228.3	192.1	44.6	42.7	25.6		Not Found	Peak Found	Peak Found	High	High	High	Peak Found	Peak Found	Peak Found
P35221	R.TPEELDDSDFETEDFDVR.S	[634-651]	P35221-3 1xPhospho [S/T]; P35221 1xPhospho [S/T]; P35221-2 1xPhospho [S/T]	[R].TPEELDDSDFETEDFDVR.[S]	1xPhospho [S/T]	Used	0	2238.86	90.2	107	67.3	187.5	190.1	76.4	127.1	21.5	32.9		High	High	High	High	High	High	High	High	High
P35221	R.SRTSVQTEDDQLIAGQSAR.A	[652-670]	P26232-3 1xPhospho [S/T]; P35221-3 1xPhospho [S/T]; P26232-6 1xPhospho [S/T]; P35221 1xPhospho [S/T]; P26232 1xPhospho [S/T]; P26232-2 1xPhospho [S/T]; P26232-4 1xPhospho [S/T]; P26232-5 1xPhospho [S/T]; P35221-2 1xPhospho [S/T]	[R].SRTSVQTEDDQLIAGQSAR.[A]	1xPhospho [S/T]	Used	1	2141.98	82.1	86.4	59.8	164.4	234.4	175.1	31.9	31.8	34.1		High	High	High	High	High	High	High	High	High
P35222	R.TSMGGTQQQFVEGVR.M	[551-565]	P35222 1xPhospho [T/S]	[R].TSMGGTQQQFVEGVR.[M]	1xPhospho [T/S]; 1xOxidation [M3]	Used	0	1720.74	169.5	321.5	119.9	61.8	48.3	71.3	16.4	43.4	47.9		Peak Found	High	High	Peak Found	Peak Found	High	Peak Found	High	Peak Found
P35222	R.TSMGGTQQQFVEGVR.M	[551-565]	P35222 1xPhospho [T/S]	[R].TSMGGTQQQFVEGVR.[M]	1xPhospho [T/S]	Used	0	1704.74	38.1	315.4	181.5	108.3	84.3	63.1	19.5	47.2	42.6		Peak Found	High	High	High	Peak Found	Peak Found	Peak Found	Peak Found	Peak Found
P35222	R.RTSMGGTQQQFVEGVR.M	[550-565]	P35222 1xPhospho [T/S]	[R].RTSMGGTQQQFVEGVR.[M]	1xPhospho [T/S]	Used	1	1860.84	154.6	253.6	158.2	87.9	80.5	55.4	19.2	45.9	44.5		High	High	High	High	High	High	High	High	High
P35222	K.KRLSVELTSSLFR.T	[672-684]	P35222 1xPhospho [S675]	[K].KRLSVELTSSLFR.[T]	1xPhospho [S4]	Used	2	1615.86		301.7	120.4	116.7	168.3		192.9				Not Found	Peak Found	High	Peak Found	Peak Found	Not Found	Peak Found	Not Found	Not Found
P35222	R.SPQMVSAIVR.T	[191-200]	P35222 1xPhospho [S191]	[R].SPQMVSAIVR.[T]	1xPhospho [S1]; 1xOxidation [M4]	Used	0	1183.55	323.8	200.3	82.7	73.8	53.9	53.9	36.4	39.5	35.7		High	High	High	Peak Found	Peak Found	Peak Found	Peak Found	Peak Found	Peak Found
P35222	R.SPQMVSAIVR.T	[191-200]	P35222 1xPhospho [S191]	[R].SPQMVSAIVR.[T]	1xPhospho [S1]	Used	0	1167.56	114.1	237.5	151.2	146.4	64.1	47.8	65	39.3	34.6		High	High	High	High	High	High	Peak Found	Peak Found	High
P35222	R.RTSMGGTQQQFVEGVR.M	[550-565]	P35222 1xPhospho [S/T]	[R].RTSMGGTQQQFVEGVR.[M]	1xPhospho [S/T]; 1xOxidation [M4]	Used	1	1876.84	190.8	278.9	125.1	73.3	62.4	65.8	15.9	34.6	53.3		High	High	High	High	High	High	High	Peak Found	High
P35222	R.RTSMGGTQQQFVEGVR.M	[550-565]	P35222 1xPhospho [S552]	[R].RTSMGGTQQQFVEGVR.[M]	1xDeamidated [Q9]; 1xPhospho [S3]; 1xOxidation [M4]	Used	1	1877.82		450.3			134.2	143.1		83.9	88.5		High	High	Not Found	Not Found	Peak Found	Peak Found	Not Found	Peak Found	Peak Found
P35232	R.QVSDDLTER.A	[149-157]	P35232 1xPhospho [S151]	[R].QVSDDLTER.[A]	1xPhospho [S3]	Used	0	1142.47		162.6	58.4	56.8	46.7		141.5	254.4	179.6		Not Found	Peak Found	Peak Found	Peak Found	Peak Found	Not Found	Peak Found	High	Peak Found
P35251-1	K.LERTPQKNVQGK.R	[503-514]	P35251-1 1xPhospho [T506]; P35251-2 1xPhospho [T506]	[K].LERTPQKNVQGK.[R]	1xPhospho [T4]	Used	2	1477.75	64.2	71.9	99.3	83.2	93.8	86.1	55.5	181.6	164.3		High	Peak Found	Peak Found	Peak Found	Peak Found	Peak Found	Peak Found	Peak Found	Peak Found
P35251-1	K.KESVSPEDSEK.K	[364-374]	P35251-1 1xPhospho [S368]; P35251-2 1xPhospho [S368]	[K].KESVSPEDSEK.[K]	1xPhospho [S5]	Used	1	1314.55	94.7	118.3	74.1	86.9	69.1	73.2	124	128.3	131.4		High	Peak Found	Peak Found	Peak Found	Peak Found	Peak Found	Peak Found	High	Peak Found
P35251-1	K.NKPLSPIKLTPTSVLDYFGTGSVQR.S	[152-176]	P35251-1 1xPhospho [S156]; P35251-2 1xPhospho [S156]	[K].NKPLSPIKLTPTSVLDYFGTGSVQR.[S]	1xPhospho [S5]	Used	1	2798.45	68.4	124.5	106.6	61.7	64.5	74.6	167.5	120.1	112.2		High	High	High	Peak Found	Peak Found	Peak Found	High	High	High
P35251-1	K.SSADKIGEVSSPK.A	[302-314]	P35251-1 1xPhospho [S311]; P35251-2 1xPhospho [S311]	[K].SSADKIGEVSSPK.[A]	1xPhospho [S10]	Used	1	1384.64	79.8	145.2	85	68.2	39.8	39	109.3	184.1	149.7		Peak Found	Peak Found	Peak Found	Peak Found	Peak Found	Peak Found	High	Peak Found	Peak Found
P35251-1	K.ESVSPEDSEKKR.T	[365-376]	P35251-1 1xPhospho [S]; P35251-2 1xPhospho [S]	[K].ESVSPEDSEKKR.[T]	1xPhospho [S]	Used	2	1470.65	56.8	11.3	102.3	78	90.7	109	101.1	176.3	174.6		Peak Found	High	Peak Found	Peak Found	High	Peak Found	Peak Found	High	High
P35251-1	K.ESVSPEDSEK.K	[365-374]	P35251-1 1xPhospho [S]; P35251-2 1xPhospho [S]	[K].ESVSPEDSEK.[K]	1xPhospho [S]	Used	0	1186.45	96.3	109	70	84.3	74.1	87	123.6	147.5	108		High	High	High	High	High	High	High	High	High
P35269	R.GNSRPGTPSAEGGSTSSTLR.A	[383-402]	P35269 2xPhospho [S385; S391]	[R].GNSRPGTPSAEGGSTSSTLR.[A]	2xPhospho [S3; S9]	Used	0	2078.85	164.5	194.9	166.5	96.6	25	55.9	33.6	96.9	66.1		Peak Found	High	Peak Found	Peak Found	Peak Found	Peak Found	Peak Found	Peak Found	Peak Found
P35269	R.GNSRPGTPSAEGGSTSSTLR.A	[383-402]	P35269 1xPhospho [T389]	[R].GNSRPGTPSAEGGSTSSTLR.[A]	1xPhospho [T7]	Used	0	1998.89	198.7	163.6	124.4	87.1	24.6	32.7	67.9	115.3	85.8		High	High	High	Peak Found	Peak Found	Peak Found	Peak Found	Peak Found	Peak Found
P35269	K.TTPNSGDVQVTEDAVR.R	[445-460]	P35269 1xPhospho [T/S]	[K].TTPNSGDVQVTEDAVR.[R]	1xPhospho [T/S]	Used	0	1768.77	185.5	135.1	115.3	76.8	85.2	74	80.7	86.9	60.4		Peak Found	Peak Found	Peak Found	High	Peak Found	High	High	High	Peak Found
P35568	R.THSAGTSPTITHQK.T	[525-538]	P35568 2xPhospho [S/T]	[R].THSAGTSPTITHQK.[T]	2xPhospho [S/T]	Used	0	1625.67	209.6	223.9	144.3	115.6	122.6	84					High	High	High	High	Peak Found	High	Not Found	Not Found	Not Found
P35568	R.RHSSETFSSTPSATR.V	[1098-1112]	P35568 1xPhospho [T1103]	[R].RHSSETFSSTPSATR.[V]	1xPhospho [T6]	Used	1	1730.75	11.3	146.8	231	126.3	236.1	129.2			19.3		Peak Found	Peak Found	Peak Found	High	Peak Found	Peak Found	Not Found	Not Found	Peak Found
P35568	R.THSAGTSPTITHQK.T	[525-538]	P35568 1xPhospho [T/S]	[R].THSAGTSPTITHQK.[T]	1xPhospho [T/S]	Used	0	1545.71	222.1	145.7	133.7	109.4	127.7	114.5	9.3	17.8	19.8		High	High	High	High	High	High	Peak Found	Peak Found	Peak Found
P35568	R.VNLSPNRNQSAK.V	[1075-1086]	P35568 1xPhospho [S1078]	[R].VNLSPNRNQSAK.[V]	1xPhospho [S4]	Used	1	1407.67	91	146	199.6	109.4	132.2	151.1	23.1	34.8	12.9		Peak Found	High	High	Peak Found	High	High	Peak Found	Peak Found	Peak Found
P35568	-.MASPPESDGFSDVRK.V	[1-15]	P35568 1xPhospho [S3]; 1xMet-loss+Acetyl [N-Term]	[-].MASPPESDGFSDVRK.[V]	1xPhospho [S3]; 1xMet-loss+Acetyl [N-Term]	Used	1	1613.68	112	152.9	166.4	128.1	126.6	136.6	26.1	26.3	25		High	High	High	High	High	High	Peak Found	Peak Found	Peak Found
P35568	-.MASPPESDGFSDVR.K	[1-14]	P35568 1xPhospho [S3]; 1xMet-loss+Acetyl [N-Term]	[-].MASPPESDGFSDVR.[K]	1xPhospho [S3]; 1xMet-loss+Acetyl [N-Term]	Used	0	1485.59	136.8	132.4	186.1	162	67.5	156.3		39.8	18.9		High	Peak Found	Peak Found	High	Peak Found	High	Not Found	Peak Found	Peak Found
P35568	R.HSSETFSSTPSATR.V	[1099-1112]	P35568 1xPhospho [S1101]	[R].HSSETFSSTPSATR.[V]	1xPhospho [S3]	Used	0	1574.65	169.6	161.2	106.6	115.8	171.8	130.7	5.3	20.9	18		High	Peak Found	Peak Found	Peak Found	High	Peak Found	Peak Found	Peak Found	Peak Found
P35568	R.ASSDGEGTMSRPASVDGSPVSPSTNR.T	[328-353]	P35568 1xPhospho [S341]	[R].ASSDGEGTMSRPASVDGSPVSPSTNR.[T]	1xPhospho [S14]; 1xOxidation [M9]	Used	0	2645.11		229.4	253	128.6	148.4	140.5					Not Found	High	High	Peak Found	Peak Found	Peak Found	Not Found	Not Found	Not Found
P35568	R.SKSQSSSNCSNPISVPLRR.H	[268-286]	P35568 1xPhospho [S270]	[R].SKSQSSSNCSNPISVPLRR.[H]	1xCarbamidomethyl [C9]; 1xPhospho [S3]	Used	2	2184.02	11.6	140.3	252.5	160.8	182.7	90.8		25.9	35.3		Peak Found	Peak Found	High	Peak Found	Peak Found	Peak Found	Not Found	Peak Found	Peak Found
P35568	R.RSSASVSGSPSDGGFISSDEYGSSPCDFR.S	[411-439]	P35568 1xPhospho [S412]	[R].RSSASVSGSPSDGGFISSDEYGSSPCDFR.[S]	1xCarbamidomethyl [C26]; 1xPhospho [S2]	Used	1	3078.24	277.1	344.4	213.2		65.2						Peak Found	High	Peak Found	Not Found	Peak Found	Not Found	Not Found	Not Found	Not Found
P35579-1	R.KGAGDGSDEEVDGK.A	[1937-1950]	P35579-1 1xPhospho [S1943]; P35579-2 1xPhospho [S1365]	[R].KGAGDGSDEEVDGK.[A]	1xPhospho [S7]	Used	1	1443.56	18.9	89.8	19.4	375.6	123.1	93.2	13.3	132	34.7		High	High	High	High	High	High	Peak Found	High	High
P35579-1	R.KGAGDGSDEEVDGKADGAEAKPAE.-	[1937-1960]	P35579-1 1xPhospho [S1943]; P35579-2 1xPhospho [S1365]	[R].KGAGDGSDEEVDGKADGAEAKPAE.[-]	1xPhospho [S7]	Used	2	2382.99	112.5	83.2	110.9	156.3	89.1	74.7	75.7	100	97.7		High	High	High	High	High	High	High	High	High
P35579-1	K.GAGDGSDEEVDGKADGAEAKPAE.-	[1938-1960]	P35579-1 1xPhospho [S1943]; P35579-2 1xPhospho [S1365]	[K].GAGDGSDEEVDGKADGAEAKPAE.[-]	1xPhospho [S6]	Used	1	2254.9	87.5	104.7	107.2	133.3	90.8	81.6	105.4	88	101.4		High	High	High	High	High	Peak Found	High	High	Peak Found
P35606	R.STAQQELDGKPASPTPVIVASHTANKEEK.S	[847-875]	P35606-2 1xPhospho [T/S]; P35606 1xPhospho [T/S]	[R].STAQQELDGKPASPTPVIVASHTANKEEK.[S]	1xPhospho [T/S]	Used	1	3113.52	154.1	50.1	114.1	117.3	151.2	84.9	25.7	77.9	124.7		High	High	High	High	High	High	High	High	High
P35606	R.STAQQELDGKPASPTPVIVASHTANK.E	[847-872]	P35606-2 1xPhospho [T/S]; P35606 1xPhospho [T/S]	[R].STAQQELDGKPASPTPVIVASHTANK.[E]	1xPhospho [T/S]	Used	0	2727.33	154.7	80.4	77.4	149.2	98.8	83.8	70.7	91.1	94		High	High	High	High	High	High	High	Peak Found	High
P35606	R.STAQQELDGKPASPTPVIVASHTANKEEK.S	[847-875]	P35606-2 1xPhospho [S818]; P35606 1xPhospho [S847]	[R].STAQQELDGKPASPTPVIVASHTANKEEK.[S]	1xDeamidated [Q4]; 1xPhospho [S1]	Used	1	3114.5		330		69		422.9	78.1				Not Found	Peak Found	Not Found	Peak Found	Not Found	High	Peak Found	Not Found	Not Found
P35611-1	R.AAVVTSPPPTTAPHKER.Y	[7-23]	P35611-2 1xPhospho [T11]; P35611-6 1xPhospho [T11]; P35611-4 1xPhospho [T11]; P35611-3 1xPhospho [T11]; P35611-5 1xPhospho [T11]; P35611-1 1xPhospho [T11]	[R].AAVVTSPPPTTAPHKER.[Y]	1xPhospho [T5]	Used	1	1838.92	69.8	74.9	88.2	110.8	150.9	141.3	49.8	91.4	122.9		Peak Found	Peak Found	Peak Found	High	High	High	Peak Found	High	Peak Found
P35611-1	R.KQKGSEENLDEAR.E	[582-594]	P35611-2 1xPhospho [S586]; P35611-6 1xPhospho [S617]; P35611-4 1xPhospho [S617]; P35611-3 1xPhospho [S617]; P35611-1 1xPhospho [S586]	[R].KQKGSEENLDEAR.[E]	1xPhospho [S5]	Used	2	1583.71	6.1		1.7	272.2	302.1	276	10.2	14.1	17.8		Peak Found	Not Found	Peak Found	High	Peak Found	High	Peak Found	Peak Found	Peak Found
P35611-1	K.QKGSEENLDEAR.E	[583-594]	P35611-2 1xPhospho [S586]; P35611-6 1xPhospho [S617]; P35611-4 1xPhospho [S617]; P35611-3 1xPhospho [S617]; P35611-1 1xPhospho [S586]	[K].QKGSEENLDEAR.[E]	1xPhospho [S4]	Used	1	1455.61			8	250.4	334	238.2	18.7	26.9	23.8		Not Found	Not Found	Peak Found	High	High	Peak Found	Peak Found	Peak Found	Peak Found
P35611-1	R.SPGSPVGEGTGSPPK.W	[355-369]	P35611-2 1xPhospho [S]; P35611-6 1xPhospho [S]; P35611-4 1xPhospho [S]; P35611-3 1xPhospho [S]; P35611-5 1xPhospho [S]; P35611-1 1xPhospho [S]	[R].SPGSPVGEGTGSPPK.[W]	1xPhospho [S]	Used	0	1433.63	66.8	65.1	46.8	145	131.6	153.4	93.5	106.1	91.7		High	High	High	High	High	High	High	High	High
P35611-1	K.SRSPGSPVGEGTGSPPK.W	[353-369]	P35611-2 1xPhospho [S]; P35611-6 1xPhospho [S]; P35611-4 1xPhospho [S]; P35611-3 1xPhospho [S]; P35611-5 1xPhospho [S]; P35611-1 1xPhospho [S]	[K].SRSPGSPVGEGTGSPPK.[W]	1xPhospho [S]	Used	1	1676.76	61.1	59.7	54.4	125	147.2	171.6	83.1	98.5	99.3		High	Peak Found	High	High	High	High	High	High	High
P35611-1	R.AAVVTSPPPTTAPHK.E	[7-21]	P35611-2 1xPhospho [S/T]; P35611-6 1xPhospho [S/T]; P35611-4 1xPhospho [S/T]; P35611-3 1xPhospho [S/T]; P35611-5 1xPhospho [S/T]; P35611-1 1xPhospho [S/T]	[R].AAVVTSPPPTTAPHK.[E]	1xPhospho [S/T]	Used	0	1553.77	113.6	87.9	59.7	165.1	120.3	104.2	73.5	90	85.7		High	High	High	High	High	High	High	High	High
P35611-1; Q9UEY8-1	K.FRTPSFLKK.N	[689-697]	Q9UEY8-2 1xPhospho [S661]; P35611-3 1xPhospho [S757]; P35611-1 1xPhospho [S726]; Q9UEY8-1 1xPhospho [S693]; P35612-1 1xPhospho [S713]	[K].FRTPSFLKK.[NS]	1xPhospho [S5]	Not Used	2	1203.63	4	60.3	55	135.8	242.5	141.1	73.2	79.6	108.6	Shared	Peak Found	Peak Found	Peak Found	High	High	High	Peak Found	Peak Found	High
P35611-1; Q9UEY8-1	K.FRTPSFLKK.S	[722-730]	Q9UEY8-2 1xPhospho [S661]; P35611-3 1xPhospho [S757]; P35611-1 1xPhospho [S726]; Q9UEY8-1 1xPhospho [S693]; P35612-1 1xPhospho [S713]	[K].FRTPSFLKK.[NS]	1xPhospho [S5]	Not Used	2	1203.63	4	60.3	55	135.8	242.5	141.1	73.2	79.6	108.6	Shared	Peak Found	Peak Found	Peak Found	High	High	High	Peak Found	Peak Found	High
P35611-1; Q9UEY8-1	R.TPSFLKK.N	[691-697]	Q9UEY8-2 1xPhospho [S661]; P35611-3 1xPhospho [S757]; P35611-1 1xPhospho [S726]; Q9UEY8-1 1xPhospho [S693]; P35612-1 1xPhospho [S713]	[R].TPSFLKK.[NS]	1xPhospho [S3]	Not Used	1	900.459	0.6	62.7	49.6	191.1	163.5	185.8	75.9	83.4	87.4	Shared	Peak Found	High	Peak Found	Peak Found	Peak Found	High	High	High	High
P35611-1; Q9UEY8-1	R.TPSFLKK.S	[724-730]	Q9UEY8-2 1xPhospho [S661]; P35611-3 1xPhospho [S757]; P35611-1 1xPhospho [S726]; Q9UEY8-1 1xPhospho [S693]; P35612-1 1xPhospho [S713]	[R].TPSFLKK.[NS]	1xPhospho [S3]	Not Used	1	900.459	0.6	62.7	49.6	191.1	163.5	185.8	75.9	83.4	87.4	Shared	Peak Found	High	Peak Found	Peak Found	Peak Found	High	High	High	High
P35613	R.RKPEDVLDDDDAGSAPLK.S	[349-366]	P35613-4 1xPhospho [S182]; P35613-2 1xPhospho [S246]; P35613-3 1xPhospho [S153]; P35613 1xPhospho [S362]	[R].RKPEDVLDDDDAGSAPLK.[S]	1xPhospho [S14]	Used	1	2020.92	254	125.2	153.5	40.4	47.2	29.3	54.4	89.9	106		High	Peak Found	High	Peak Found	Peak Found	Peak Found	Peak Found	Peak Found	High
P35613	R.KPEDVLDDDDAGSAPLK.S	[350-366]	P35613-4 1xPhospho [S182]; P35613-2 1xPhospho [S246]; P35613-3 1xPhospho [S153]; P35613 1xPhospho [S362]	[R].KPEDVLDDDDAGSAPLK.[S]	1xPhospho [S13]	Used	0	1864.82	174.7	181.1	159.3	46.2	48.5	38.5	102.9	94.1	54.7		High	High	High	Peak Found	Peak Found	Peak Found	Peak Found	Peak Found	Peak Found
P35658-1	K.SPGSTPTTPTSSQAPQK.L	[430-446]	P35658-1 2xPhospho [T/S]; P35658-4 2xPhospho [T/S]; P35658-5 2xPhospho [T/S]; P35658-2 2xPhospho [T/S]; P35658-3 2xPhospho [T/S]	[K].SPGSTPTTPTSSQAPQK.[L]	2xPhospho [T/S]	Used	0	1831.75		85.8	63.5	121.4	127.9	134.6	114.9	130.5	121.5		Not Found	High	Peak Found	High	High	Peak Found	High	Peak Found	High
P35658-1	K.VPAKLSPMK.Q	[935-943]	P35658-1 1xPhospho [S940]; P35658-4 1xPhospho [S930]; P35658-5 1xPhospho [S929]; P35658-2 1xPhospho [S929]; P35658-3 1xPhospho [S941]	[K].VPAKLSPMK.[Q]	1xPhospho [S6]; 1xOxidation [M8]	Used	1	1066.54	100.4	137.5	88.9		80.3	93.9	101.4	145.9	151.7		Peak Found	High	Peak Found	Not Found	Peak Found	Peak Found	Peak Found	Peak Found	High
P35658-1	R.TPSIQPSLLPHAAPFAK.S	[1021-1037]	P35658-1 1xPhospho [S1023]; P35658-4 1xPhospho [S1013]; P35658-5 1xPhospho [S1012]; P35658-2 1xPhospho [S1012]; P35658-3 1xPhospho [S1024]	[R].TPSIQPSLLPHAAPFAK.[S]	1xPhospho [S3]	Used	0	1854.95	20.1	126.1	65.1	322	83.9	111.3	19.4	93.2	58.9		Peak Found	Peak Found	Peak Found	High	Peak Found	Peak Found	Peak Found	Peak Found	Peak Found
P35658-1	R.ITPPAAKPGSPQAK.S	[669-682]	P35658-1 1xPhospho [S678]; P35658-4 1xPhospho [S668]; P35658-5 1xPhospho [S667]; P35658-2 1xPhospho [S667]; P35658-3 1xPhospho [S679]	[R].ITPPAAKPGSPQAK.[S]	1xPhospho [S10]	Used	0	1442.74	91.4	101	95	120.8	56.4	63.3	111.4	127.8	133		High	High	High	High	High	High	High	High	High
P35658-1	K.SPGSTPTTPTSSQAPQK.L	[430-446]	P35658-1 1xPhospho [S/T]; P35658-4 1xPhospho [S/T]; P35658-5 1xPhospho [S/T]; P35658-2 1xPhospho [S/T]; P35658-3 1xPhospho [S/T]	[K].SPGSTPTTPTSSQAPQK.[L]	1xPhospho [S/T]	Used	0	1751.78	77	79.2	68.5	91	111.9	109.9	126	117.3	119.3		High	Peak Found	Peak Found	Peak Found	Peak Found	Peak Found	Peak Found	Peak Found	High
P35659-1	K.ESESEDSSDDEPLIK.K	[300-314]	P35659-2 1xPhospho [S267]; P35659-1 1xPhospho [S301]	[K].ESESEDSSDDEPLIK.[K]	1xPhospho [S2]	Used	0	1759.68		142.9	120.9	161	129.5	109.6	139.1	97.1			Not Found	High	High	Peak Found	Peak Found	Peak Found	Peak Found	Peak Found	Not Found
P35659-1	-.MSASAPAAEGEGTPTQPASEKEPEMPGPR.E	[1-29]	P35659-2 1xPhospho [S]; 1xMet-loss+Acetyl [N-Term]; P35659-1 1xPhospho [S]; 1xMet-loss+Acetyl [N-Term]	[-].MSASAPAAEGEGTPTQPASEKEPEMPGPR.[E]	1xPhospho [S]; 1xMet-loss+Acetyl [N-Term]	Used	1	2901.26		70.8	87.9	119.2	115.2	92.7	131	134.7	148.5		Not Found	Peak Found	Peak Found	High	High	Peak Found	Peak Found	Peak Found	Peak Found
P35659-1	K.KESESEDSSDDEPLIKK.L	[299-315]	P35659-2 1xPhospho [S]; P35659-1 1xPhospho [S]	[K].KESESEDSSDDEPLIKK.[L]	1xPhospho [S]	Used	2	2015.87	200.6	63.2	94	102.7	129.6	86.4	43.4	83.4	96.7		High	High	High	High	Peak Found	Peak Found	High	High	High
P35659-1	K.KESESEDSSDDEPLIK.K	[299-314]	P35659-2 1xPhospho [S]; P35659-1 1xPhospho [S]	[K].KESESEDSSDDEPLIK.[K]	1xPhospho [S]	Used	1	1887.77	147.5	78.1	95.6	128	121.6	89	73.8	81.4	85		Peak Found	Peak Found	Peak Found	High	Peak Found	Peak Found	Peak Found	Peak Found	High
P35659-1	K.ESESEDSSDDEPLIKK.L	[300-315]	P35659-2 1xPhospho [S]; P35659-1 1xPhospho [S]	[K].ESESEDSSDDEPLIKK.[L]	1xPhospho [S]	Used	1	1887.77	114.1	71.4	89.5	117.3	122.2	106.2	88.9	95.3	95		High	High	High	High	High	High	High	High	Peak Found
P35680-1	R.GVSPSKAHGLGSNLVTEVR.V	[277-295]	P35680-4 1xPhospho [S223]; P35680-3 1xPhospho [S279]; P35680-2 1xPhospho [S253]; P35680-1 1xPhospho [S279]	[R].GVSPSKAHGLGSNLVTEVR.[V]	1xPhospho [S3]	Used	1	1988				193.1	438.9	268					Not Found	Not Found	Not Found	High	High	High	Not Found	Not Found	Not Found
P35900 P35900	R.SLSSSLQAPVVSTVGMQR.L	[11-28]	P35900 P35900 1xPhospho [S]	[R].SLSSSLQAPVVSTVGMQR.[L]	1xPhospho [S]; 1xOxidation [M16]	Used	0	1942.93	0.6	1.7	1.4	326.1	261.2	302.8	0.6	3.2	2.4		Peak Found	Peak Found	Peak Found	High	High	High	Peak Found	Peak Found	Peak Found
P35900 P35900	R.SLSSSLQAPVVSTVGMQR.L	[11-28]	P35900 P35900 1xPhospho [S]	[R].SLSSSLQAPVVSTVGMQR.[L]	1xPhospho [S]	Used	0	1926.94		1.9	1	388.5	290.6	217.9					Not Found	Peak Found	Peak Found	High	High	High	Not Found	Not Found	Not Found
P36507	R.LNQPGTPTR.T	[389-397]	P36507 1xPhospho [T]	[R].LNQPGTPTR.[T]	1xPhospho [T]	Used	0	1063.49	109	133.8	115	80.9	85.1	90.2	66.4	118.2	101.4		High	High	High	High	High	High	High	High	High
P36507	R.RKPVLPALTINPTIAEGPSPTSEGASEANLVDLQK.K	[5-39]	P36507 1xPhospho [S26]	[R].RKPVLPALTINPTIAEGPSPTSEGASEANLVDLQK.[K]	1xPhospho [S22]	Used	1	3693.91							900				Not Found	Not Found	Not Found	Not Found	Not Found	Not Found	High	Not Found	Not Found
P36578	R.ILKSPEIQR.A	[292-300]	P36578 1xPhospho [S295]	[R].ILKSPEIQR.[A]	1xPhospho [S4]	Used	1	1163.62	130.7	88.4	109	86.1	97.3	99.9	78.8	111.1	98.6		High	Peak Found	High	High	High	Peak Found	High	High	High
P36871-1	K.AIGGIILTASHNPGGPNGDFGIK.F	[108-130]	P36871-2 1xPhospho [T/S]; P36871-1 1xPhospho [T/S]	[K].AIGGIILTASHNPGGPNGDFGIK.[F]	1xPhospho [T/S]	Used	0	2286.13	6.6	68.5		124	96.4	57.8	317.5	73.6	155.6		Peak Found	Peak Found	Not Found	Peak Found	Peak Found	Peak Found	High	High	Peak Found
P36871-1	K.AIGGIILTASHNPGGPNGDFGIK.F	[108-130]	P36871-2 1xPhospho [T/S]; P36871-1 1xPhospho [T/S]	[K].AIGGIILTASHNPGGPNGDFGIK.[F]	1xDeamidated [N]; 1xPhospho [T/S]	Used	0	2287.11	13.6	93.6		95.3	111.9	56.7	368.7		160.2		Peak Found	Peak Found	Not Found	High	High	Peak Found	High	High	High
P36915-1	R.EEQTDTSDGESVTHHIR.R	[45-61]	P36915-1 1xPhospho [T/S]	[R].EEQTDTSDGESVTHHIR.[R]	1xPhospho [T/S]	Used	0	2020.82	228.8	83.5	113	97.3	126.4	59.6	51.8	58	81.5		High	High	High	High	High	High	High	High	High
P36915-1	R.REEQTDTSDGESVTHHIR.R	[44-61]	P36915-1 1xPhospho [S/T]	[R].REEQTDTSDGESVTHHIR.[R]	1xPhospho [S/T]	Used	1	2176.93	170.4	113	137.3	82.9	116.2	54.3	39	50.1	136.7		High	High	High	High	High	High	Peak Found	High	High
P37802	R.NFSDNQLQEGK.N	[161-171]	P37802 1xPhospho [S163]; P37802-2 1xPhospho [S184]	[R].NFSDNQLQEGK.[N]	1xPhospho [S3]	Used	0	1359.56		14.7	37.3	84.4	133.3	324.7	190.6	52.5	62.5		Not Found	Peak Found	Peak Found	High	High	High	High	Peak Found	Peak Found
P38159-1	R.DVYLSPRDDGYSTK.D	[204-217]	P38159-2 1xPhospho [S/Y]; P38159-1 1xPhospho [S/Y]; Q96E39 1xPhospho [S/Y]	[R].DVYLSPRDDGYSTK.[D]	1xPhospho [Y/S]	Used	1	1695.73	83	78.4	84.1	72	54.7	58.7	135.8	159.2	174.2		High	High	Peak Found	Peak Found	High	Peak Found	High	High	High
P38159-1	R.DYGHSSSRDDYPSR.G	[245-258]	P38159-2 1xPhospho [S237]; P38159-1 1xPhospho [S250]; Q96E39 1xPhospho [S250]	[R].DYGHSSSRDDYPSR.[G]	1xPhospho [S6]	Used	1	1721.66	104.6	74.8	149.2	59.5	109.6	85.5	45.9	121.4	149.5		Peak Found	Peak Found	Peak Found	Peak Found	Peak Found	Peak Found	Peak Found	Peak Found	High
P38159-1	R.DVYLSPR.D	[204-210]	P38159-2 1xPhospho [S195]; P38159-1 1xPhospho [S208]; Q96E39 1xPhospho [S208]	[R].DVYLSPR.[D]	1xPhospho [S5]	Used	0	929.413	129	76.8	52.4	89.4	53.1	58.8	153.1	157.6	129.7		Peak Found	High	High	Peak Found	Peak Found	High	High	High	High
P38398	R.SSPSKCPSLDDR.W	[1496-1507]	P38398-5 1xPhospho [S355]; P38398-7 1xPhospho [S1518]; P38398-8 1xPhospho [S1450]; P38398-6 1xPhospho [S393]; P38398 1xPhospho [S1497]; P38398-4 1xPhospho [S1480]; P38398-3 1xPhospho [S393]	[R].SSPSKCPSLDDR.[W]	1xCarbamidomethyl [C6]; 1xPhospho [S2]	Used	1	1428.58		94.3	90.9	73	82.4	82.6	169.5	158.2	149.1		Not Found	Peak Found	Peak Found	Peak Found	Peak Found	Peak Found	High	Peak Found	High
P38432	R.NSSEKLPTELSKEEPSTK.N	[270-287]	P38432 1xPhospho [T/S]	[R].NSSEKLPTELSKEEPSTK.[N]	1xPhospho [T/S]	Used	2	2083.98	196.2	127.6	262	64.2	99.4	73	18.1	59.3			High	High	Peak Found	Peak Found	High	Peak Found	Peak Found	Peak Found	Not Found
P38432	R.NSSEKLPTELSK.E	[270-281]	P38432 1xPhospho [S271]	[R].NSSEKLPTELSK.[E]	1xPhospho [S2]	Used	1	1412.67	229.7	146.6	145.7	73.4	71.5	62.8	61	62.1	47.3		High	Peak Found	Peak Found	Peak Found	Peak Found	Peak Found	Peak Found	Peak Found	Peak Found
P38919	-.MATTATMATSGSAR.K	[1-14]	P38919 1xPhospho [S12]; 1xMet-loss+Acetyl [N-Term]	[-].MATTATMATSGSAR.[K]	1xPhospho [S12]; 1xMet-loss+Acetyl [N-Term]	Used	0	1347.56		153.9	113.7	91.1	64.3	58.1	78.5	204.1	136.3		Not Found	High	Peak Found	Peak Found	Peak Found	Peak Found	Peak Found	Peak Found	Peak Found
P39687	R.NRTPSDVKELVLDNSR.S	[13-28]	P39687 1xPhospho [T/S]	[R].NRTPSDVKELVLDNSR.[S]	1xPhospho [T/S]	Used	2	1922.93	37.4	42.9	99.3	91.3	113.4	117.7	91	104.9	202.3		High	High	High	High	High	High	High	High	High
P39687	R.TPSDVKELVLDNSR.S	[15-28]	P39687 1xPhospho [S/T]	[R].TPSDVKELVLDNSR.[S]	1xPhospho [S/T]	Used	1	1652.79		55.6	46.9	160.6	101.1	124.2	167.3	101.2	143.2		Not Found	Peak Found	Peak Found	High	High	Peak Found	Peak Found	Peak Found	High
P39880	R.AYQQKPYPSPK.T	[1262-1272]	P39880-3 1xPhospho [S1281]; P39880-6 1xPhospho [S1112]; P39880-4 1xPhospho [S1168]; P39880-5 1xPhospho [S1214]; P39880-2 1xPhospho [S1248]; P39880 1xPhospho [S1270]	[R].AYQQKPYPSPK.[T]	1xPhospho [S9]	Used	0	1386.65							900				Peak Found	Peak Found	Peak Found	Peak Found	Peak Found	Peak Found	High	Peak Found	High
P40123	K.SHTPSPTSPK.S	[305-314]	P40123-2 1xPhospho [S248]; P40123 1xPhospho [S312]	[K].SHTPSPTSPK.[S]	1xPhospho [S8]	Used	0	1118.49	128.1	154.1	96.5	33.5	38.9	37.8	109.7	156.7	144.6		High	High	High	Peak Found	Peak Found	Peak Found	Peak Found	High	High
P40189-1	K.SHIAQWSPHTPPR.H	[661-673]	P40189-1 1xPhospho [S667]; P40189-3 1xPhospho [S606]	[K].SHIAQWSPHTPPR.[H]	1xPhospho [S7]	Used	0	1593.73	56.4			317.9	322.2	203.6					Peak Found	Not Found	Not Found	Peak Found	High	High	Not Found	Not Found	Not Found
P40222	R.RPEGPGAQAPSSPR.V	[504-517]	P40222 1xPhospho [S]	[R].RPEGPGAQAPSSPR.[V]	1xPhospho [S]	Used	0	1486.68	75.7	61.6	60.8	113.1	131.5	110.1	99.1	130.4	117.9		High	High	High	High	High	High	High	High	High
P40425	K.GGGSAAAAAAAAASGGGVSPDNSIEHSDYR.S	[133-162]	P40425 1xPhospho [S136]	[K].GGGSAAAAAAAAASGGGVSPDNSIEHSDYR.[S]	1xPhospho [S4]	Used	0	2754.18	56.2	63.3	57.9	99.1	97.2	89	122.3	136.1	179		Peak Found	Peak Found	Peak Found	High	Peak Found	Peak Found	Peak Found	Peak Found	High
P40425	K.TAVSVTQGGHSR.T	[320-331]	P40425 1xPhospho [S330]	[K].TAVSVTQGGHSR.[T]	1xPhospho [S11]	Used	0	1279.58	67.8	85.9	53.1	130.9	121.8	130.6	56.8	144.2	108.8		Peak Found	High	Peak Found	High	High	Peak Found	Peak Found	High	High
P40763	K.FICVTPTTCSNTIDLPMSPR.T	[710-729]	P40763-2 1xPhospho [S726]; P40763 1xPhospho [S727]	[K].FICVTPTTCSNTIDLPMSPR.[T]	2xCarbamidomethyl [C3; C9]; 1xPhospho [S18]; 1xOxidation [M17]	Used	0	2406.05	156.5	207.4	127	133	73.3	68.2		67.1	67.4		High	Peak Found	Peak Found	Peak Found	Peak Found	Peak Found	Not Found	Peak Found	Peak Found
P40763	K.FICVTPTTCSNTIDLPMSPR.T	[710-729]	P40763-2 1xPhospho [S726]; P40763 1xPhospho [S727]	[K].FICVTPTTCSNTIDLPMSPR.[T]	2xCarbamidomethyl [C3; C9]; 1xPhospho [S18]	Used	0	2390.06		399.1	334.5	12.5	92.2		61.6				Not Found	High	High	Peak Found	Peak Found	Not Found	Peak Found	Not Found	Not Found
P40818	R.SYSSPDITQAIQEEEKR.K	[716-732]	P40818 1xPhospho [S718]; P40818-2 1xPhospho [S612]	[R].SYSSPDITQAIQEEEKR.[K]	1xDeamidated [Q9]; 1xPhospho [S3]	Not Used	1	2061.9										No Quan Values	Not Found	Not Found	High	Not Found	Not Found	Not Found	Not Found	Not Found	Not Found
P40818	K.RSYSSPDITQAIQEEEKR.K	[715-732]	P40818 1xPhospho [S716]; P40818-2 1xPhospho [S610]	[K].RSYSSPDITQAIQEEEKR.[K]	1xDeamidated [Q10]; 1xPhospho [S2]	Not Used	2	2218										No Quan Values	Not Found	Not Found	High	Not Found	Not Found	Not Found	Not Found	Not Found	Not Found
P40818	R.SYSSPDITQAIQEEEKR.K	[716-732]	P40818 1xPhospho [S718]; P40818-2 1xPhospho [S612]	[R].SYSSPDITQAIQEEEKR.[K]	1xPhospho [S3]	Used	1	2060.92	56.7	99.1	101.8	152.3	138.8	149.6	64.3	62.7	74.6		High	High	High	High	High	Peak Found	Peak Found	Peak Found	Peak Found
P40818	R.SYSSPDITQAIQEEEK.R	[716-731]	P40818 1xPhospho [S718]; P40818-2 1xPhospho [S612]	[R].SYSSPDITQAIQEEEK.[R]	1xPhospho [S3]	Used	0	1904.82	51.2	92	111.7	154.9	122	157.5	73.6	68.6	68.5		High	Peak Found	Peak Found	Peak Found	Peak Found	Peak Found	Peak Found	Peak Found	Peak Found
P40818	K.RSYSSPDITQAIQEEEKR.K	[715-732]	P40818 1xPhospho [S]; P40818-2 1xPhospho [S]	[K].RSYSSPDITQAIQEEEKR.[K]	1xPhospho [S]	Used	2	2217.02	57.7	73.6	112.5	117.2	208	119.2	54.4	61.8	95.6		Peak Found	High	High	High	High	High	High	High	High
P40818	K.RCPTPEIQKK.S	[574-583]	P40818 1xPhospho [T577]; P40818-2 1xPhospho [T500]	[K].RCPTPEIQKK.[S]	1xCarbamidomethyl [C2]; 1xPhospho [T4]	Used	2	1336.64	92.2	92.2	54.4	134.1	177.5	144.8	36.3	92.4	76.1		High	High	High	High	High	High	Peak Found	High	High
P40855-1	K.NATDLQNSSMSEEELTK.A	[139-155]	P40855-1 1xPhospho [S147]; P40855-5 1xPhospho [S109]	[K].NATDLQNSSMSEEELTK.[A]	1xPhospho [S9]	Used	0	1976.82		31.3	80.9	126.2	88.9	75.9	163.1	182.8	150.9		Not Found	Peak Found	Peak Found	Peak Found	Peak Found	Peak Found	Peak Found	High	High
P41162	R.FHFPPLDTHSPTNDVQPGR.F	[150-168]	P41162 1xPhospho [T161]	[R].FHFPPLDTHSPTNDVQPGR.[F]	1xPhospho [T12]	Used	0	2242.01		295.6	311.3						293.2		Not Found	Peak Found	Peak Found	Not Found	Not Found	Not Found	Not Found	Not Found	High
P41208	R.MSPKPELTEEQKQEIR.E	[19-34]	P41208 1xPhospho [T/S]	[R].MSPKPELTEEQKQEIR.[E]	1xPhospho [T/S]; 1xOxidation [M1]	Used	1	2038.95	103.1	95.4	148.4	55.8	131.8	84.9	45.4	100.2	135		Peak Found	High	High	Peak Found	High	Peak Found	Peak Found	High	Peak Found
P41227-1	K.GNSPPSSGEACREEK.G	[184-198]	P41227-1 1xPhospho [S186]; P41227-2 1xPhospho [S171]	[K].GNSPPSSGEACREEK.[G]	1xCarbamidomethyl [C11]; 1xPhospho [S3]	Used	1	1684.66	117	106.9	96.9	80.8	111.4	122.5	96.3	84.2	83.9		High	High	High	High	High	High	High	High	High
P41227-1	K.GNSPPSSGEACR.E	[184-195]	P41227-1 1xPhospho [S186]; P41227-2 1xPhospho [S171]	[K].GNSPPSSGEACR.[E]	1xCarbamidomethyl [C11]; 1xPhospho [S3]	Used	0	1298.48	121.7	115.6	63.1	110.9	102.2	109.7	103.2	95.7	77.9		Peak Found	Peak Found	Peak Found	High	Peak Found	Peak Found	High	High	High
P41229	K.TFLESKEELSHSPEPCTK.M	[290-307]	P41229-5 1xPhospho [S]; P41229-3 1xPhospho [S]; P41229 1xPhospho [S]; P41229-2 1xPhospho [S]; P41229-4 1xPhospho [S]	[K].TFLESKEELSHSPEPCTK.[M]	1xCarbamidomethyl [C16]; 1xPhospho [S]	Used	1	2198.97	97.1	50.7	86.7	114.2	141.3	111.9	56.7	91.3	150		Peak Found	Peak Found	High	Peak Found	Peak Found	Peak Found	Peak Found	High	High
P41229	K.EELSHSPEPCTK.M	[296-307]	P41229-5 1xPhospho [S]; P41229-3 1xPhospho [S]; P41229 1xPhospho [S]; P41229-2 1xPhospho [S]; P41229-4 1xPhospho [S]	[K].EELSHSPEPCTK.[M]	1xCarbamidomethyl [C10]; 1xPhospho [S]	Used	0	1493.6	79.4	84.5	46.5	147.5	133.8	96.5	100.9	108.4	102.6		Peak Found	High	Peak Found	Peak Found	High	High	High	High	High
P41235	R.QITSPVSGINGDIR.A	[164-177]	P41235-6 1xPhospho [S]; P41235-4 1xPhospho [S]; P41235 1xPhospho [S]; P41235-5 1xPhospho [S]; P41235-2 1xPhospho [S]; P41235-3 1xPhospho [S]; P41235-7 1xPhospho [S]	[R].QITSPVSGINGDIR.[A]	1xPhospho [S]	Used	0	1536.74				90.3	69.6	79.5	250.7	206.3	203.7		Not Found	Not Found	Not Found	Peak Found	High	Peak Found	High	High	High
P41235	R.GQAATPETPQPSPPGGSGSEPYK.L	[425-447]	P41235-4 1xPhospho [S/T]; P41235 1xPhospho [S/T]; P41235-5 1xPhospho [S/T]	[R].GQAATPETPQPSPPGGSGSEPYK.[L]	1xPhospho [S/T]	Used	0	2320.01			11.4	75	94.5	85	251.5	188.3	194.2		Not Found	Not Found	Peak Found	Peak Found	High	Peak Found	High	High	High
P41235	R.QITSPVSGINGDIR.A	[164-177]	P41235-6 1xPhospho [S/T]; P41235-4 1xPhospho [S/T]; P41235 1xPhospho [S/T]; P41235-5 1xPhospho [S/T]; P41235-2 1xPhospho [S/T]; P41235-3 1xPhospho [S/T]; P41235-7 1xPhospho [S/T]	[R].QITSPVSGINGDIR.[A]	1xDeamidated [N10]; 1xPhospho [S/T]	Used	0	1537.73		26.5	10.9	73.1	92.4	93.7	225.9	214.2	163.4		Not Found	Peak Found	Peak Found	Peak Found	High	High	High	High	High
P41236	R.IQEQESSGEEDSDLSPEER.E	[116-134]	P41236 1xPhospho [S]; Q6NXS1 1xPhospho [S]	[R].IQEQESSGEEDSDLSPEER.[E]	1xPhospho [S]	Used	0	2243.88	123.2	84.5	71.3	117.8	102.2	101.9	123.8	96.8	78.5		High	High	Peak Found	High	Peak Found	High	High	High	Peak Found
P41252	K.APLKPYPVSPSDK.V	[1039-1051]	P41252 1xPhospho [S1047]	[K].APLKPYPVSPSDK.[V]	1xPhospho [S9]	Used	0	1478.73	184	128.9	120.6	71.2	71.8	62.3	90.9	93.3	77		High	High	High	High	High	Peak Found	High	High	High
P41252	K.APLKPYPVSPSDKVLIQEK.T	[1039-1057]	P41252 1xPhospho [S]	[K].APLKPYPVSPSDKVLIQEK.[T]	1xPhospho [S]	Used	1	2189.16	110.9	132.4	115.8	103.9	41	78.4	97	102.3	118.3		Peak Found	High	Peak Found	High	Peak Found	Peak Found	High	Peak Found	Peak Found
P41743	K.EGLRPGDTTSTFCGTPNYIAPEILR.G	[402-426]	P41743 1xPhospho [S/T]	[K].EGLRPGDTTSTFCGTPNYIAPEILR.[G]	1xCarbamidomethyl [C13]; 1xPhospho [S/T/Y]	Used	0	2845.32	39	109	104.9	166.1	111.1	85.7	186.5	51.3	46.5		High	High	High	High	High	High	High	High	High
P42166	R.SHISDQSPLSSK.R	[345-356]	P42166 1xPhospho [S351]	[R].SHISDQSPLSSK.[R]	1xPhospho [S7]	Used	0	1365.6	49.8	76.7	46.1	79.9	84.4	95.1	146.5	166.6	154.9		Peak Found	Peak Found	Peak Found	Peak Found	Peak Found	Peak Found	High	Peak Found	Peak Found
P42166	R.LSEKSVEER.D	[432-440]	P42166 1xPhospho [S436]	[R].LSEKSVEER.[D]	1xPhospho [S5]	Used	1	1156.52	96.3	88.9	131.7	105.4	62.5	66.4	106.1	115.4	127.4		Peak Found	Peak Found	High	Peak Found	Peak Found	Peak Found	Peak Found	Peak Found	Peak Found
P42167	R.AKTPVTLK.Q	[206-213]	P42167 1xPhospho [T208]; P42167-3 1xPhospho [T208]; P42167-2 1xPhospho [T208]	[R].AKTPVTLK.[Q]	1xPhospho [T3]	Used	1	937.512	1.1	140.1	67.7	142	83.2	86.5	63.5	184.2	131.7		Peak Found	High	High	High	High	High	Peak Found	Peak Found	Peak Found
P42167	R.QNGSNDSDRYSDNEEDSKIELK.L	[174-195]	P42167 1xPhospho [S177]; P42167-3 1xPhospho [S177]; P42167-2 1xPhospho [S177]	[R].QNGSNDSDRYSDNEEDSKIELK.[L]	1xPhospho [S4]	Used	2	2623.08	139.1	71.9	104.2	84.2	137	77	68.3	88.6	129.8		Peak Found	Peak Found	High	Peak Found	Peak Found	Peak Found	Peak Found	Peak Found	Peak Found
P42167	K.HASPILPITEFSDIPR.R	[304-319]	P42167 1xPhospho [S306]	[K].HASPILPITEFSDIPR.[R]	1xPhospho [S3]	Used	0	1872.93	21.9	148.8	112	45.9	95.3	48.7	285.6	83.1	58.7		Peak Found	High	High	Peak Found	High	Peak Found	High	High	High
P42167	R.QNGSNDSDRYSDNEEDSKIELK.L	[174-195]	P42167 1xPhospho [S177]; P42167-3 1xPhospho [S177]; P42167-2 1xPhospho [S177]	[R].QNGSNDSDRYSDNEEDSKIELK.[L]	1xDeamidated [Q1]; 1xPhospho [S4]	Used	2	2624.06		126.6	138.6	110.5	165.9		131.3	96	131.2		Not Found	Peak Found	High	Peak Found	High	Not Found	Peak Found	Peak Found	Peak Found
P42167; P42166	K.GPPDFSSDEEREPTPVLGSGAAAAGR.S	[61-86]	P42167 1xPhospho [S/T]; P42167-3 1xPhospho [S/T]; P42166 1xPhospho [S/T]; P42167-2 1xPhospho [S/T]	[K].GPPDFSSDEEREPTPVLGSGAAAAGR.[S]	1xPhospho [S/T]	Not Used	1	2650.18	33	123.4	103.5	163.5	81.7	96.1	109.5	94.5	94.8	Shared	High	High	High	High	Peak Found	High	High	High	High
P42167; P42166	R.SSTPLPTISSSAENTR.Q	[158-173]	P42167 1xPhospho [S/T]; P42167-3 1xPhospho [S/T]; P42166 1xPhospho [S/T]; P42167-2 1xPhospho [S/T]	[R].SSTPLPTISSSAENTR.[Q]	1xPhospho [S/T]	Not Used	0	1727.78	62.9	106.4	71.7	144	136.8	162.1	68.4	77.3	70.4	Shared	High	High	High	High	High	High	High	Peak Found	High
P42167; P42166	K.GPPDFSSDEEREPTPVLGSGAAAAGR.S	[61-86]	P42167 1xPhospho [S/T]; P42167-3 1xPhospho [S/T]; P42166 1xPhospho [S/T]; P42167-2 1xPhospho [S/T]	[K].GPPDFSSDEEREPTPVLGSGAAAAGR.[S]	1xPhospho [S/T]	Not Used	1	2650.18	33	123.4	103.5	163.5	81.7	96.1	109.5	94.5	94.8	Shared	High	High	High	High	Peak Found	High	High	High	High
P42167; P42166	R.SSTPLPTISSSAENTR.Q	[158-173]	P42167 1xPhospho [S/T]; P42167-3 1xPhospho [S/T]; P42166 1xPhospho [S/T]; P42167-2 1xPhospho [S/T]	[R].SSTPLPTISSSAENTR.[Q]	1xPhospho [S/T]	Not Used	0	1727.78	62.9	106.4	71.7	144	136.8	162.1	68.4	77.3	70.4	Shared	High	High	High	High	High	High	High	Peak Found	High
P42331	R.GTPQIQR.V	[334-340]	P42331-6 1xPhospho [T329]; P42331-3 1xPhospho [T328]; P42331-5 1xPhospho [T296]; P42331-2 1xPhospho [T329]; P42331 1xPhospho [T335]; P42331-4 1xPhospho [T336]	[R].GTPQIQR.[V]	2xDeamidated [Q4; Q6]; 1xPhospho [T2]	Used	0	881.376	419.7	19.5	21.7	44.2	59.9	47.9	115.9	70.2	101.1		Peak Found	Peak Found	Peak Found	Peak Found	Peak Found	Peak Found	High	Peak Found	Peak Found
P42356	K.TSSVSSISQVSPER.G	[255-268]	P42356 1xPhospho [S]	[K].TSSVSSISQVSPER.[G]	1xPhospho [S]	Used	0	1543.7	86	133.9	56.1	108.8	107.7	122.6	86.5	108.8	89.5		High	High	Peak Found	Peak Found	Peak Found	Peak Found	Peak Found	Peak Found	High
P42566-1	R.SINKLDSPDPFK.L	[790-801]	P42566-1 1xPhospho [S796]; P42566-2 1xPhospho [S482]	[R].SINKLDSPDPFK.[L]	1xPhospho [S7]	Used	1	1440.68	143.6	141.6	70.3	131.5	113.5	109.6	60.7	64	65.2		Peak Found	High	Peak Found	Peak Found	High	Peak Found	Peak Found	Peak Found	High
P42575-1	K.NHAGSPGCEESDAGKEK.L	[336-352]	P42575-1 1xPhospho [S340]	[K].NHAGSPGCEESDAGKEK.[L]	1xCarbamidomethyl [C8]; 1xPhospho [S5]	Used	1	1852.72	34.3	38.5	34.1	128.7	155.4	114.8	126.1	120.1	148		Peak Found	Peak Found	High	Peak Found	High	Peak Found	High	High	High
P42677	K.DLLHPSPEEEKRK.H	[6-18]	P42677 1xPhospho [S11]	[K].DLLHPSPEEEKRK.[H]	1xPhospho [S6]	Used	2	1657.79	262.5	79.1	131.8	80	111.2	69.3	13.1	82.2	70.7		High	Peak Found	High	High	High	Peak Found	Peak Found	Peak Found	Peak Found
P42677	R.LTEGCSFR.R	[73-80]	Q71UM5 1xPhospho [S78]; P42677 1xPhospho [S78]	[R].LTEGCSFR.[R]	1xCarbamidomethyl [C5]; 1xPhospho [S6]	Used	0	1049.41	61.3	89.3	65.1	203.7	89.7	114.6	68.7	121.6	86.1		High	High	Peak Found	High	Peak Found	High	High	Peak Found	High
P42684	K.VPVLISPTLK.H	[931-940]	P42684-6 1xPhospho [S915]; P42684-3 1xPhospho [S921]; P42684-10 1xPhospho [S818]; P42684-4 1xPhospho [S797]; P42684 1xPhospho [S936]; P42684-5 1xPhospho [S833]; P42684-7 1xPhospho [S812]; P42684-2 1xPhospho [S900]	[K].VPVLISPTLK.[H]	1xPhospho [S6]	Used	0	1146.65	174.5	172.8	151.4	35.2	24.5	18.1	112.9	111.3	99.3		Peak Found	High	Peak Found	Peak Found	Peak Found	Peak Found	Peak Found	Peak Found	Peak Found
P42684	R.DKSPSSLLEDAK.E	[629-640]	P42684-6 1xPhospho [S610]; P42684-3 1xPhospho [S616]; P42684-10 1xPhospho [S616]; P42684-4 1xPhospho [S595]; P42684 1xPhospho [S631]; P42684-5 1xPhospho [S631]; P42684-7 1xPhospho [S610]; P42684-2 1xPhospho [S595]	[R].DKSPSSLLEDAK.[E]	1xPhospho [S3]	Used	1	1369.62	205.5	155.5	137.8	44.9	49.6	43.4	100.2	82	81.1		High	Peak Found	Peak Found	Peak Found	Peak Found	Peak Found	Peak Found	Peak Found	Peak Found
P42684	R.DKSPSSLLEDAKETCFTR.D	[629-646]	P42684-6 1xPhospho [S613]; P42684-3 1xPhospho [S619]; P42684-10 1xPhospho [S619]; P42684-4 1xPhospho [S598]; P42684 1xPhospho [S634]; P42684-5 1xPhospho [S634]; P42684-7 1xPhospho [S613]; P42684-2 1xPhospho [S598]	[R].DKSPSSLLEDAKETCFTR.[D]	1xCarbamidomethyl [C15]; 1xPhospho [S6]	Used	2	2163.96	87.5	114.8	189.2	34.7	35.9	45.4	145.7	116.1	130.6		Peak Found	Peak Found	High	Peak Found	Peak Found	Peak Found	Peak Found	Peak Found	Peak Found
[truncated: 4,686 more rows]
