# Supplementary material for: Characterisation of Colorectal Cancer Cell Lines through Proteomic Profiling of Their Extracellular Vesicles
Source: Proteomes. 2023 Jan 11;11(1):3. doi: 10.3390/proteomes11010003 (PMC9844407; doi:10.3390/proteomes11010003)
Supplement: Supplementary file 1 [file proteomes-11-00003-s001.zip › Table S7.xlsx]

## Sheet: GO term
GO term analysis of phosphoproteomics
UP in HCT116 vs SW620 and UP in HCT116 vs HT29							UP in HT29 vs HCT116 and UP in HT29 vs SW620							SW620_vs_HCT116_UP_AND_SW620_vs_HT29_UP
GO term analysis of 127 proteins							GO term analysis of 171 proteins							GO term analysis of 161 proteins
Category	Term	Gene count	Gene Uniprot ID	List Total	Benjamini		Category	Term	Gene count	Gene Uniprot ID	List Total	Benjamini		Category	Term	Gene count	Gene Uniprot ID	List Total	Benjamini
GOTERM_CC_DIRECT	GO:0005737~cytoplasm	63	Q96AX9, Q14764, P07900, Q96HA7, Q13557, P07948, Q5EBL4, Q9Y6G9, Q9Y4C1, O60488, Q70EL2, P04083, Q14573, Q52LW3, Q96SB3, Q2VPK5, Q86Y91, Q6H8Q1, P11137, P37108, P10644, O75131, P35568, O75182, Q53GA4, Q8WX93, Q96KN1, P09382, Q8WY36, P00533, P16070, Q96LD4, Q9UBL6, P02795, Q9UPT6, O95292, O95171, Q96JP2, O60869, Q9Y6M1, Q05397, Q8IVF2, Q6F5E8, O60343, Q02952, Q9NVI1, O95817, Q14195, Q15642, O95819,…	119	8.73216e-06		GOTERM_MF_DIRECT	GO:0098641~cadherin binding involved in cell-cell adhesion	20	Q9H4G0, Q14247, Q15599, P0DMV8, Q13813, Q32MZ4, P14923, O95292, Q5VV41, P37802, Q09666, O60716, Q8TE68, Q9UDY2, P25815, Q9P2M7, P04083, P31949, P05783, Q14134	162	1.36662e-08		GOTERM_CC_DIRECT	GO:0005654~nucleoplasm	47	Q9UN79, Q86UW7, Q9NYB0, Q8IWS0, P48431, P54253, P15923, Q5EBL4, Q9UKN8, Q9H0S4, Q9H165, Q01196, P41235, P38398, Q9Y6G9, Q9BTE3, Q01167, Q7Z6Z7, O14929, Q96AE4, P61962, Q99607, P28715, Q9UNS1, Q93009, O15417, Q14134, P26358, P05412, O95104, Q9BYW2, P56524, Q16512, O75376, Q86V15, Q6P2E9, Q8NB78, Q86W56, Q5FBB7, Q9BUL9, Q8IWC1, Q04726, Q9P2K5, Q14181, P67870, P01106, Q96RL1	148	8.82221e-05
GOTERM_CC_DIRECT	GO:0005925~focal adhesion	13	O15143, O15231, Q09666, Q03135, O75131, Q05397, O60504, Q8WX93, P04083, Q02952, P16070, P00533, P04792	119	0.000906643		GOTERM_CC_DIRECT	GO:0005913~cell-cell adherens junction	20	Q9H4G0, Q14247, Q15599, P0DMV8, Q13813, Q32MZ4, P14923, O95292, Q5VV41, P37802, Q09666, O60716, Q8TE68, Q9UDY2, P25815, Q9P2M7, P04083, P31949, P05783, Q14134	162	1.94989e-08		GOTERM_CC_DIRECT	GO:0005737~cytoplasm	71	P19174, P54253, P07948, P15923, Q86YS7, Q5EBL4, Q9H165, Q8TE67, O60566, Q9Y6G9, Q9BTE3, P11171, Q8IZD4, Q8WWI1, Q16555, P46821, Q14134, P48681, P56524, Q9BQ67, Q68CZ2, Q16512, Q32MZ4, P10644, Q8TF76, P13796, Q6P2E9, Q86W56, Q5FBB7, P25815, Q8WX93, Q9P2K5, Q14181, P09382, Q6IQ23, O43572, Q9NYB0, P48431, Q76FK4, O43933, Q96JP2, Q9NU22, Q01196, P41235, Q8TBB1, P38398, Q8IXJ6, Q6F5E8, P23528, Q7Z6Z7,…	148	8.82221e-05
GOTERM_CC_DIRECT	GO:0015629~actin cytoskeleton	10	Q96SB3, Q8WX93, Q6F5E8, Q6H8Q1, O15231, O15143, Q09666, P42684, O00401, Q05682	119	0.000906643		GOTERM_CC_DIRECT	GO:0070062~extracellular exosome	54	Q14247, Q14764, O75223, P30484, Q8TE68, P05091, P04083, P47755, Q8IV36, P14923, Q06210, O00159, Q9P227, O60656, P25815, O76070, P16070, P05783, Q6IQ23, Q16881, Q05193, Q15599, Q13813, Q08380, P19075, Q15758, O15143, O43933, O95171, P30101, O00401, P30740, P23528, Q7Z6Z7, O60343, Q9NZM1, Q15642, P26038, P35080, Q9UBI6, O95466, Q9UKK3, P55011, O75674, P37802, Q09666, O60716, P54920, O14737, P31949,…	162	3.05436e-06		GOTERM_CC_DIRECT	GO:0005634~nucleus	72	Q13951, Q8IWS0, Q13118, P54253, P07948, P15923, Q9H165, Q9BTE3, Q01167, P11171, Q8IZD4, Q8WWI1, Q99607, P28715, Q9UNS1, Q14135, Q9UPW0, P05412, Q9BYW2, P56524, Q9BQ67, Q16512, O94875, Q32MZ4, O75376, Q5M775, Q8TF76, Q6P2E9, Q86W56, Q5FBB7, P25815, Q8WX93, Q9P2K5, P09382, P01106, Q5HYJ3, Q96RL1, Q96QR8, Q6IQ23, Q9UN79, Q16649, Q9NYB0, P48431, Q76FK4, Q9NU22, Q01196, P41235, Q00059, P38398, Q8IXJ6,…	148	0.000110772
GOTERM_CC_DIRECT	GO:0005856~cytoskeleton	12	Q14764, Q9NQX3, Q02952, Q8TD16, Q96JP2, P04792, Q9Y6M1, Q15642, Q05397, Q13671, O60504, Q05682	119	0.00140157		GOTERM_BP_DIRECT	GO:0098609~cell-cell adhesion	17	Q9H4G0, Q14247, Q15599, P0DMV8, Q13813, Q32MZ4, O95292, Q5VV41, P37802, Q09666, Q8TE68, Q9UDY2, P25815, Q9P2M7, P31949, P05783, Q14134	156	4.73166e-06		GOTERM_CC_DIRECT	GO:0005829~cytosol	47	O43572, Q96G74, Q92835, P48431, Q9ULH0, Q9Y365, P19174, P07948, O43933, Q5EBL4, O43237, Q9H2Y7, Q00059, Q8IXJ6, O60566, Q7Z6Z7, Q8IZD4, Q14195, Q16555, Q14194, P42684, P46821, Q93009, P47755, P05412, P56524, Q9NZI8, O95466, Q16512, Q32MZ4, P10644, Q96PY5, P13796, P31321, Q6P2E9, Q96G46, P54920, Q05682, Q9P227, O14737, Q5FBB7, P08670, P67870, P01106, O15344, Q14684, Q13233	148	0.00445916
GOTERM_CC_DIRECT	GO:0005829~cytosol	41	Q96AX9, Q96EP0, P07900, Q969R8, P07948, O15143, Q13557, Q5EBL4, Q86TI0, Q9Y6M1, P53602, Q05397, O60504, O00401, O95817, Q14195, P42684, Q15642, Q9Y3R5, Q52LW3, Q6VN20, Q2VPK5, Q13009, P37108, P10644, Q96PY5, Q09666, O75131, Q96AQ6, P35568, O60658, O43847, Q05682, P42331, Q9NUJ1, Q9ULC8, P27815, P45985, P04792, P02795, P21399	119	0.00140157		GOTERM_CC_DIRECT	GO:0005737~cytoplasm	79	Q14247, Q14764, Q6ZRV2, P0DMV8, Q9ULR3, P04637, P54253, Q13557, Q8TE67, Q8TE68, O60566, P50616, P04083, Q14134, Q14573, P47712, Q8TF72, Q52LW3, Q2VPK5, Q16512, O15530, Q6H8Q1, Q8IV36, Q32MZ4, P14923, P53618, P58107, P35568, O00159, O14639, P25815, O76070, Q9P2K5, Q96KN1, Q9H1Z4, P16070, P05783, Q6IQ23, Q9H4G0, P48431, Q76FK4, O43933, O95292, O95171, P30740, Q8TBB1, P38398, Q8IXJ6, Q9UDY2, P23528,…	162	6.86439e-06		GOTERM_MF_DIRECT	GO:0044822~poly(A) RNA binding	26	Q05193, Q71RC2, Q8IWS0, Q76FK4, Q9H0S4, Q9H2Y7, Q00059, Q9Y6G9, Q7Z6Z7, Q96AE4, Q92834, P05412, O95104, Q9BQ67, Q9NZI8, Q8N9T8, O94875, Q9GZT3, Q96G46, P16401, Q9BUL9, Q9P2K5, P09382, Q96QR8, Q14684, Q9BRJ6	152	0.00624667
GOTERM_CC_DIRECT	GO:0031234~extrinsic component of cytoplasmic side of plasma membrane	5	Q13009, Q6F5E8, P07948, P42684, Q05397	119	0.0364027		GOTERM_CC_DIRECT	GO:0005829~cytosol	55	Q96G74, P0DMV8, P04637, Q13557, Q92619, O75223, Q5VV41, O43237, Q9H2Y7, O60566, P09493, P47755, P47712, P05412, Q52LW3, Q2VPK5, Q16512, O15530, Q32MZ4, P14923, P53618, Q06210, P35568, O00159, Q9P227, Q16881, Q9H4G0, Q92835, P48431, Q13813, Q9Y365, O15143, O43933, O00401, Q9UHY1, Q00059, Q8IXJ6, Q9UDY2, Q7Z6Z7, A7KAX9, Q14194, Q15642, P47736, Q8TDB6, O95466, Q8IY33, O75674, Q09666, O60716, P54920,…	162	0.000137518		GOTERM_CC_DIRECT	GO:0015629~actin cytoskeleton	9	Q8IWC1, Q8WX93, Q6F5E8, P23528, O94875, P13796, P42684, P47755, Q05682	148	0.0173474
GOTERM_CC_DIRECT	GO:0005913~cell-cell adherens junction	9	Q8TDM6, P07948, P04083, O95817, O95292, Q09666, P00533, Q96PY5, Q05682	119	0.0381479		GOTERM_MF_DIRECT	GO:0003779~actin binding	14	Q9H4G0, Q9UPQ0, Q13813, Q6H8Q1, Q8TE77, Q8TE68, O00159, O00401, O14639, Q9P2M7, P09493, O94929, P26038, P47755	162	0.000439235		GOTERM_BP_DIRECT	GO:0000226~microtubule cytoskeleton organization	7	Q8IWC1, Q9HC35, O15344, O43237, Q5M775, Q14194, P46821	147	0.0184997
GOTERM_MF_DIRECT	GO:0005515~protein binding	79	Q96AX9, Q96EP0, Q14764, P07900, Q96HA7, Q13557, P07948, Q86TI0, Q96CP6, Q9Y6G9, P04083, O15479, A0JLT2, Q14573, O95049, Q15742, Q96SB3, Q2VPK5, Q13009, Q86Y91, P11137, P37108, Q9H5V8, P10644, O75131, O43847, P35568, Q05682, Q9NW97, O75182, Q8WX93, Q96KN1, P52926, Q5C9Z4, P09382, P00533, P16070, Q9UBL6, Q6IQ22, P02795, P30989, Q9BUR5, Q9UPT6, Q719H9, O95292, O95171, Q03135, O60869, Q9Y6M1, O60504,…	115	0.079546		GOTERM_CC_DIRECT	GO:0005856~cytoskeleton	14	Q8TF72, Q9H4G0, Q14247, Q14764, Q6ZRV2, Q92835, Q32MZ4, P14923, Q8TE77, P58107, P09493, Q15642, P26038, P35080	162	0.00139057		GOTERM_BP_DIRECT	GO:0010977~negative regulation of neuron projection development	6	Q14678, P08670, P09382, Q14195, Q14194, Q9H165	147	0.0184997
GOTERM_CC_DIRECT	GO:0005768~endosome	7	Q9Y3R5, Q9UKS6, P04083, Q96HB5, P00533, Q7Z3C6, Q03135	119	0.0949476		GOTERM_CC_DIRECT	GO:0001725~stress fiber	6	O14639, P09493, Q8IY33, O94929, O60292, O00159	162	0.00494274		GOTERM_CC_DIRECT	GO:0001726~ruffle	6	Q765P7, Q8WX93, Q6F5E8, P19174, P31949, P13796	148	0.0254821
GOTERM_CC_DIRECT	GO:0030027~lamellipodium	6	Q96SB3, Q8WX93, Q6F5E8, Q14195, Q05397, O00401	119	0.0949476		GOTERM_CC_DIRECT	GO:0015629~actin cytoskeleton	10	O14639, P23528, Q6H8Q1, O15231, O15143, A7KAX9, P14923, Q09666, P47755, O00401	162	0.00530274		GOTERM_CC_DIRECT	GO:0045111~intermediate filament cytoskeleton	5	P48681, P08670, Q6F5E8, Q14134, Q9NU22	148	0.0254821
GOTERM_BP_DIRECT	GO:0030335~positive regulation of cell migration	8	Q1W6H9, Q13009, Q6F5E8, P07948, P21709, P00533, O75131, Q05397	108	0.102469		GOTERM_CC_DIRECT	GO:0005925~focal adhesion	13	Q14247, Q15599, P0DMV8, O15530, O15143, O15231, P14923, Q09666, P30101, P23528, P04083, P16070, P26038	162	0.00623084		GOTERM_CC_DIRECT	GO:0043234~protein complex	11	P38398, P56524, Q16512, Q9ULH0, P11171, O14929, P01106, P15923, P61962, Q16555, P10644	148	0.0463925
GOTERM_BP_DIRECT	GO:0048013~ephrin receptor signaling pathway	6	Q13009, P07948, O15143, P21709, Q05397, O00401	108	0.102469		GOTERM_MF_DIRECT	GO:0005096~GTPase activator activity	12	P05412, Q52LW3, P21359, Q92619, O60343, A7KAX9, O60292, Q15642, Q6ZUM4, P47736, P00352, Q9P227	162	0.00835685		GOTERM_CC_DIRECT	GO:0030027~lamellipodium	7	Q9NZI8, Q765P7, Q8WX93, Q6F5E8, O94875, P19174, Q14195	148	0.0463925
GOTERM_BP_DIRECT	GO:0018108~peptidyl-tyrosine phosphorylation	7	P07900, P07948, P21709, P00533, P45985, P42684, Q05397	108	0.135895		GOTERM_CC_DIRECT	GO:0016020~membrane	35	Q14764, Q13813, Q9Y365, Q08380, Q15758, Q92619, Q13557, P30484, O43237, P39656, Q9H2Y7, P30740, Q9UHY1, Q7Z6Z7, P23528, Q9HC35, Q6ZUM4, P47736, P47755, Q14573, Q12797, O95466, Q9UKK3, O15530, P04626, Q3KR37, P55011, P53618, O75376, Q09666, P54920, O00159, P16455, P21359, Q16584	162	0.0206716		GOTERM_CC_DIRECT	GO:0030426~growth cone	6	Q8IXJ6, Q9NZI8, Q8WX93, O75037, Q14195, Q16555	148	0.0546839
GOTERM_BP_DIRECT	GO:0050999~regulation of nitric-oxide synthase activity	4	P07900, P00533, Q03135, O00401	108	0.136227		GOTERM_CC_DIRECT	GO:0005938~cell cortex	7	Q9UHY1, Q969H4, Q14247, O95466, Q1W6H9, A7KAX9, Q15642	162	0.0206716		GOTERM_CC_DIRECT	GO:0005874~microtubule	9	Q05193, Q8IXJ6, Q9Y6G9, Q9HC35, O75037, O15344, Q16555, O43237, P46821	148	0.075346
GOTERM_BP_DIRECT	GO:0016477~cell migration	7	Q96SB3, Q13009, Q8WX93, Q6F5E8, P42684, Q96CC6, O43847	108	0.150996		GOTERM_MF_DIRECT	GO:0005515~protein binding	106	P04637, Q92619, Q5VV41, Q8TE68, O60566, Q9NRG0, P09493, P04083, O15479, Q0JRZ9, P28715, Q14573, O95049, Q12797, Q2VPK5, Q16512, O15530, Q9H5V8, O75376, O00159, Q9NW97, O76070, Q96KN1, P16070, Q8N8V4, Q16881, Q92835, P48431, Q13813, Q76FK4, O43933, Q99594, O95292, O95171, Q9UKN8, P30101, Q9UHY1, Q8IXJ6, Q9UDY2, P23528, Q7Z6Z7, Q14194, O94929, P47736, P35080, Q8TDB6, P26358, P78314, Q96MY1, O95466,…	162	0.0378814		GOTERM_CC_DIRECT	GO:0005913~cell-cell adherens junction	9	P25815, Q86W92, P07948, Q32MZ4, Q8WWI1, P31949, Q96PY5, Q14134, Q05682	148	0.0865823
GOTERM_CC_DIRECT	GO:0030018~Z disc	5	Q8IVF2, Q8WX93, O95817, Q9HDC5, P04792	119	0.160771		GOTERM_CC_DIRECT	GO:0005902~microvillus	5	Q9Y365, P26038, Q8N8V4, P55317, O00159	162	0.0385092		GOTERM_MF_DIRECT	GO:0003677~DNA binding	28	Q13951, Q16649, Q9NYB0, Q8IWS0, P48431, P54253, P15923, Q7L9B9, Q9UKN8, Q01196, P41235, Q00059, P38398, Q9NRG0, Q7Z6Z7, P26358, P05412, Q96A47, P48382, Q32MZ4, O75376, Q86V15, Q8NB78, O14737, Q9P2K5, Q14181, Q92786, P01106	152	0.150649
GOTERM_CC_DIRECT	GO:0005938~cell cortex	5	Q1W6H9, Q02952, Q03135, Q15642, Q05397	119	0.168715		GOTERM_CC_DIRECT	GO:0043209~myelin sheath	7	Q05193, Q8IXJ6, P04626, P26038, P30101, Q14573, P54920	162	0.0509888		GOTERM_MF_DIRECT	GO:0042826~histone deacetylase binding	6	P56524, Q8IXJ6, Q8IWS0, Q16512, O75376, P16401	152	0.150649
GOTERM_CC_DIRECT	GO:0005886~plasma membrane	39	P07900, P30989, P07948, Q13557, Q5EBL4, P21709, Q03135, P30484, Q05397, O00401, Q8IVF2, Q9Y6G9, Q6F5E8, P04083, Q02952, O95817, Q14573, O95049, Q9UBI6, Q9UKS6, Q96SB3, Q13009, Q9NQX3, O15231, Q8TD16, Q9H5V8, Q9HDC5, Q09666, O75131, P35568, Q05682, Q8TDM6, Q8WX93, Q96KN1, P16070, P00533, P04792, Q9UBL6, Q13671	119	0.191645		GOTERM_CC_DIRECT	GO:0005915~zonula adherens	3	P14923, Q6IQ23, O60716	162	0.0542373		GOTERM_MF_DIRECT	GO:0005515~protein binding	97	Q8IWS0, P19174, Q13118, P15923, Q96CP6, O60566, Q9Y6G9, Q9BTE3, Q9NRG0, P11171, Q96RU3, P28715, P46821, Q9UNS1, P56524, Q9BYW2, O43561, Q16512, O94875, O75376, P10644, Q8TF76, Q6P2E9, P31321, Q05682, Q8WX93, P09382, P01106, Q96RL1, Q8N8V4, Q16649, Q92835, P48431, Q76FK4, O43933, Q9UKN8, Q9H0S4, Q01196, P41235, Q8IXJ6, P23528, Q7Z6Z7, P61962, Q14195, Q9NQG6, Q14194, P42684, Q92834, Q93009, P26358,…	152	0.150649
GOTERM_CC_DIRECT	GO:0032587~ruffle membrane	4	P07900, Q96SB3, Q13009, P27815	119	0.263705		GOTERM_MF_DIRECT	GO:0019901~protein kinase binding	12	Q05193, Q6ZRV2, Q14764, O15530, P04637, P55011, O75674, P14923, P21709, P26038, Q13233, O60716	162	0.0638639		GOTERM_MF_DIRECT	GO:0008017~microtubule binding	8	Q05193, Q8IWC1, Q9HC35, O75037, Q9UDT6, O15344, Q16555, P46821	152	0.150649
GOTERM_CC_DIRECT	GO:0043025~neuronal cell body	7	P07900, Q96SB3, Q13009, O60488, Q13557, Q13671, Q14573	119	0.263705		GOTERM_BP_DIRECT	GO:0043547~positive regulation of GTPase activity	16	P05412, Q52LW3, Q13813, P04626, Q92619, Q13557, P35568, Q8TE68, Q9P227, P21359, A7KAX9, Q15642, O60292, Q6ZUM4, P47736, P00352	156	0.0888873		GOTERM_BP_DIRECT	GO:0007623~circadian rhythm	6	P05412, Q16649, Q13118, Q92786, O75376, Q9UNS1	147	0.15795
GOTERM_MF_DIRECT	GO:0004713~protein tyrosine kinase activity	6	P07900, P07948, P00533, P45985, P42684, Q05397	115	0.307018		GOTERM_BP_DIRECT	GO:0051056~regulation of small GTPase mediated signal transduction	8	Q52LW3, Q92619, A7KAX9, Q5VV41, O60292, Q15642, P47736, Q9P227	156	0.0888873		GOTERM_CC_DIRECT	GO:0005856~cytoskeleton	9	Q8IVT2, Q92835, P08670, P11171, Q96RU3, Q32MZ4, Q16555, Q96JP2, Q05682	148	0.17779
GOTERM_CC_DIRECT	GO:0030315~T-tubule	3	Q8IVF2, Q13557, Q09666	119	0.354312		GOTERM_CC_DIRECT	GO:0048471~perinuclear region of cytoplasm	13	Q14764, P0DMV8, P04626, Q9GZT3, Q13557, Q9UHY1, Q8IXJ6, O60566, O76070, P05783, Q15642, P26038, P09525	162	0.172534		GOTERM_MF_DIRECT	GO:0008134~transcription factor binding	9	P05412, P56524, Q8IXJ6, P67870, P01106, P15923, Q96QR8, Q93009, Q01196	152	0.189351
GOTERM_CC_DIRECT	GO:0030478~actin cap	2	O00401, Q05682	119	0.354312		GOTERM_CC_DIRECT	GO:0043231~intracellular membrane-bounded organelle	12	Q86UW7, Q14247, O95685, Q13813, P54253, O43933, Q9NZM1, P53618, Q86V15, P39656, Q15642, P35568	162	0.189747		GOTERM_CC_DIRECT	GO:0005925~focal adhesion	9	Q8IVT2, Q68CZ2, Q8WX93, P08670, P23528, Q86W92, O94875, Q8WWI1, P13796	148	0.220837
GOTERM_CC_DIRECT	GO:0000139~Golgi membrane	9	Q9Y3R5, Q9BUR5, Q9UPT6, O95292, P30484, P00533, Q03135, Q96CC6, Q6IQ22	119	0.457476		GOTERM_CC_DIRECT	GO:0005815~microtubule organizing center	6	O60566, Q9BUL9, Q1W6H9, O76070, Q14194, P05783	162	0.19099		GOTERM_CC_DIRECT	GO:0043231~intracellular membrane-bounded organelle	11	Q86UW7, Q8IVT2, Q01167, P54253, O14929, Q8IZD4, O43933, Q86V15, Q6P2E9, Q86W56, Q01196	148	0.220999
GOTERM_CC_DIRECT	GO:0031901~early endosome membrane	4	P04083, P30484, P00533, Q03135	119	0.457476		GOTERM_BP_DIRECT	GO:0007010~cytoskeleton organization	8	O95466, O14639, Q13813, P23528, P09493, O94929, O60292, P26038	156	0.201492		GOTERM_CC_DIRECT	GO:0005819~spindle	5	Q8IXJ6, Q8IWC1, O15344, Q14194, Q8TF76	148	0.228447
GOTERM_CC_DIRECT	GO:0030426~growth cone	4	Q96SB3, Q8WX93, Q96HB5, Q14195	119	0.457476		GOTERM_CC_DIRECT	GO:0030027~lamellipodium	6	Q9UHY1, Q14247, O14639, O94929, O60716, O00401	162	0.21475		GOTERM_CC_DIRECT	GO:0000790~nuclear chromatin	6	Q9BTE3, O14929, P15923, O75376, Q9UNS1, P16401	148	0.260353
GOTERM_CC_DIRECT	GO:0045121~membrane raft	5	P30989, P07948, Q09666, P00533, Q03135	119	0.457476		GOTERM_CC_DIRECT	GO:0016324~apical plasma membrane	8	Q8TF72, Q15599, P04626, P04083, P55011, O60292, P27216, P26038	162	0.218787		GOTERM_CC_DIRECT	GO:0005813~centrosome	9	Q5FBB7, Q8IXJ6, Q9Y6G9, Q8IWC1, Q5EBL4, O43237, Q92834, Q8TF76, Q6IQ23	148	0.271982
GOTERM_CC_DIRECT	GO:0005634~nucleus	45	Q14764, P07900, P07948, Q13557, Q719H9, Q86TI0, O60869, Q9Y6M1, Q05397, O60504, O00401, Q8IVF2, Q9H582, Q96JM2, Q9Y4C1, Q70EL2, P04083, Q9NWS9, Q5T481, Q9H1B7, A0JLT2, O95049, Q6VN20, Q15742, Q13009, Q86Y91, P37108, Q09666, O75131, Q96AQ6, P35568, O75182, P10075, Q8WX93, P52926, Q5C9Z4, P09382, Q92466, Q96LD4, P00533, P45985, P04792, Q9UBL6, P02795, Q9NZJ4	119	0.457476		GOTERM_CC_DIRECT	GO:0005903~brush border	4	Q8N8V4, P47755, Q14573, O00159	162	0.220166		GOTERM_CC_DIRECT	GO:0032587~ruffle membrane	4	Q14678, P23528, Q86YS7, P13796	148	0.304928
GOTERM_CC_DIRECT	GO:0030659~cytoplasmic vesicle membrane	4	Q8IVF2, Q9ULC8, O60343, P04083	119	0.457476		GOTERM_CC_DIRECT	GO:0005654~nucleoplasm	36	Q86UW7, P0DMV8, P48431, P04637, P54253, Q13557, Q99594, Q9UKN8, Q9UHY1, P38398, Q9UDY2, Q7Z6Z7, P04083, Q96AE4, P28715, Q6ZUM4, Q15642, O15417, Q14134, Q14573, Q8TDB6, P26358, P05412, Q96MY1, Q1W6H9, Q16512, O15530, O75376, Q86V15, O00159, P16455, Q9BUL9, Q9P2K5, Q9H1Z4, P27216, Q16881	162	0.220166		GOTERM_CC_DIRECT	GO:0016020~membrane	27	Q13951, Q71RC2, Q9ULH0, Q9Y365, Q08380, Q15758, O43237, Q9H0S4, Q9H2Y7, Q9NU22, Q9Y6G9, Q6F5E8, Q7Z6Z7, P23528, Q8IZD4, Q9HC35, Q16555, P47755, O43561, O95466, P10644, O75376, Q5M775, Q6P2E9, P54920, Q8IWC1, Q5SRE5	148	0.304928
GOTERM_CC_DIRECT	GO:0048471~perinuclear region of cytoplasm	9	Q14764, P07900, Q13557, P07948, P27815, P00533, Q03135, Q15642, P02795	119	0.457476		GOTERM_CC_DIRECT	GO:0005923~bicellular tight junction	5	O95049, Q9UDY2, Q9P2M7, Q8IY33, P58107	162	0.220166		GOTERM_CC_DIRECT	GO:0005875~microtubule associated complex	3	Q9UDT6, O15344, P46821	148	0.304928
GOTERM_CC_DIRECT	GO:0043234~protein complex	7	P07900, Q2VPK5, Q13557, P04083, Q92466, P10644, Q03135	119	0.457476		GOTERM_CC_DIRECT	GO:0005911~cell-cell junction	6	Q9H4G0, Q969H4, Q08174, Q8IY33, P14923, O60716	162	0.220166		GOTERM_CC_DIRECT	GO:0001772~immunological synapse	3	O43561, Q6F5E8, P10644	148	0.304928
GOTERM_CC_DIRECT	GO:0005874~microtubule	6	Q9Y6G9, Q1W6H9, Q13009, Q86Y91, P11137, Q96AQ6	119	0.457476		GOTERM_CC_DIRECT	GO:0005874~microtubule	8	Q8TF72, Q05193, Q8IXJ6, Q1W6H9, Q9HC35, O43237, Q9H1H9, Q16584	162	0.237188		GOTERM_CC_DIRECT	GO:0000777~condensed chromosome kinetochore	4	Q5FBB7, Q8IWS0, Q9Y6G9, O60566	148	0.317432
GOTERM_CC_DIRECT	GO:0009986~cell surface	8	P07900, P30989, P09382, P04083, P16070, P30484, P00533, O43847	119	0.531093		GOTERM_BP_DIRECT	GO:0030036~actin cytoskeleton organization	7	P21359, O15530, P23528, Q6H8Q1, O94929, Q15642, P35080	156	0.283732		GOTERM_CC_DIRECT	GO:0005815~microtubule organizing center	5	O60566, Q9BUL9, Q86YS7, Q5M775, Q14194	148	0.324092
GOTERM_CC_DIRECT	GO:0031410~cytoplasmic vesicle	5	Q8TD16, Q7Z3C6, Q03135, Q6IQ22, O00401	119	0.538433		GOTERM_CC_DIRECT	GO:0031982~vesicle	5	P23528, P04083, P37802, Q09666, P26038	162	0.295088		GOTERM_MF_DIRECT	GO:0016810~hydrolase activity, acting on carbon-nitrogen (but not peptide) bonds	3	Q14195, Q16555, Q14194	152	0.350156
GOTERM_CC_DIRECT	GO:0030666~endocytic vesicle membrane	3	Q13557, Q03135, O00401	119	0.538433		GOTERM_BP_DIRECT	GO:0014065~phosphatidylinositol 3-kinase signaling	4	Q8IXJ6, P21359, P04626, P35568	156	0.346771		GOTERM_BP_DIRECT	GO:0000122~negative regulation of transcription from RNA polymerase II promoter	16	Q16649, P56524, P48382, P48431, Q13118, P15923, O75376, Q9H165, P16401, Q8IXJ6, Q92786, P01106, Q9UNS1, Q96QR8, Q14134, P26358	147	0.367685
GOTERM_BP_DIRECT	GO:0007165~signal transduction	16	Q9UBI6, P07900, P07948, P35568, O60658, Q8TDM6, P42331, P09382, P52926, P04083, P27815, P00533, Q15642, P45985, P42684, Q13671	108	0.919654		GOTERM_CC_DIRECT	GO:0016023~cytoplasmic, membrane-bounded vesicle	5	Q16512, O15530, O00401, O00159, P47712	162	0.359237		GOTERM_MF_DIRECT	GO:0003700~transcription factor activity, sequence-specific DNA binding	17	Q9UN79, P05412, Q13951, Q16649, P48382, P48431, Q13118, P15923, Q01196, P41235, Q00059, Q01167, Q96AE4, Q92786, P01106, Q14134, Q9UPW0	152	0.383183
GOTERM_BP_DIRECT	GO:0043066~negative regulation of apoptotic process	9	P30989, P52926, P04083, O95817, P16070, P00533, P04792, Q05397, O95819	108	0.919654		GOTERM_CC_DIRECT	GO:0032587~ruffle membrane	4	P23528, P09493, Q8TE68, O00159	162	0.36513		GOTERM_MF_DIRECT	GO:0044212~transcription regulatory region DNA binding	7	P41235, P05412, P38398, P56524, P48431, Q92786, O75376	152	0.383183
GOTERM_BP_DIRECT	GO:0038096~Fc-gamma receptor signaling pathway involved in phagocytosis	5	P07900, P07948, O15143, Q05397, O00401	108	0.919654		GOTERM_CC_DIRECT	GO:0071944~cell periphery	3	P05783, P26038, P58107	162	0.45241		GOTERM_CC_DIRECT	GO:0016363~nuclear matrix	4	P23528, P54253, O14929, P61962	148	0.38355
GOTERM_BP_DIRECT	GO:0035690~cellular response to drug	4	Q96SB3, P27815, P00533, P02795	108	0.919654		GOTERM_BP_DIRECT	GO:0006972~hyperosmotic response	3	Q16512, O15530, P55011	156	0.452713		GOTERM_CC_DIRECT	GO:0000781~chromosome, telomeric region	3	Q9NYB0, Q8IXJ6, O14929	148	0.416287
GOTERM_BP_DIRECT	GO:0060333~interferon-gamma-mediated signaling pathway	4	Q13557, P16070, P30484, P02795	108	0.919654		GOTERM_MF_DIRECT	GO:0051015~actin filament binding	6	Q8TF72, O95466, P23528, P09493, Q8IY33, O15143	162	0.472283		GOTERM_CC_DIRECT	GO:0005694~chromosome	4	Q9BYW2, P38398, Q8IXJ6, Q8TF76	148	0.416287
GOTERM_BP_DIRECT	GO:0007015~actin filament organization	4	Q96SB3, Q9Y2D5, O60504, O00401	108	0.919654		GOTERM_BP_DIRECT	GO:0007265~Ras protein signal transduction	5	P05412, Q969H4, P21359, P04637, P26358	156	0.541476		GOTERM_CC_DIRECT	GO:0005952~cAMP-dependent protein kinase complex	2	P10644, P31321	148	0.416287
GOTERM_MF_DIRECT	GO:0003779~actin binding	7	Q96AX9, Q8WX93, Q6H8Q1, Q96PY5, Q05397, O00401, Q05682	115	0.973059		GOTERM_CC_DIRECT	GO:0031410~cytoplasmic vesicle	6	P04626, Q9NZM1, Q6IQ22, O00401, O00159, P47712	162	0.546279		GOTERM_CC_DIRECT	GO:0070531~BRCA1-A complex	2	P38398, Q96RL1	148	0.416287
GOTERM_MF_DIRECT	GO:0098641~cadherin binding involved in cell-cell adhesion	7	P04083, O95817, O95292, Q09666, P00533, Q96PY5, Q05682	115	0.973059		GOTERM_CC_DIRECT	GO:0032059~bleb	2	O95466, P09493	162	0.546279		GOTERM_CC_DIRECT	GO:0005677~chromatin silencing complex	2	Q8IXJ6, O15417	148	0.481208
GOTERM_MF_DIRECT	GO:0048408~epidermal growth factor binding	2	P00533, O43847	115	0.973059		GOTERM_CC_DIRECT	GO:0005886~plasma membrane	46	Q05193, Q9H4G0, Q969H4, Q14247, Q15599, Q92835, Q15758, Q13557, P21709, P30484, O00401, P38398, Q8IXJ6, Q9UDY2, P04083, Q9NZM1, Q0JRZ9, P26038, Q14573, O95049, Q9UBI6, Q12797, Q08174, O95466, Q16512, O15530, P04626, P55011, Q8IY33, O15231, Q32MZ4, P14923, P53618, Q9H5V8, Q9Y6N7, Q09666, O60716, P35568, O00159, Q96KN1, Q9H4A4, P16070, P56470, P27216, Q8N8V4, P09525	162	0.572697		GOTERM_CC_DIRECT	GO:0008290~F-actin capping protein complex	2	Q6F5E8, P47755	148	0.481208
GOTERM_MF_DIRECT	GO:0004672~protein kinase activity	7	Q96SB3, P21709, P00533, P45985, P42684, Q05397, O95819	115	0.973059		GOTERM_CC_DIRECT	GO:0030056~hemidesmosome	2	P14923, P58107	162	0.581498		GOTERM_CC_DIRECT	GO:0030018~Z disc	4	P56524, Q8WX93, O94875, Q9HDC5	148	0.481208
GOTERM_MF_DIRECT	GO:0004715~non-membrane spanning protein tyrosine kinase activity	3	P07948, P42684, Q05397	115	0.973059		GOTERM_CC_DIRECT	GO:0043234~protein complex	8	P38398, Q2VPK5, Q16512, P04637, Q13557, P04083, P39656, Q8TE68	162	0.603518		GOTERM_CC_DIRECT	GO:0017053~transcriptional repressor complex	3	P05412, P56524, O75376	148	0.482694
GOTERM_MF_DIRECT	GO:0005516~calmodulin binding	5	Q13557, P11137, P00533, O60869, Q05682	115	0.973059		GOTERM_CC_DIRECT	GO:0005677~chromatin silencing complex	2	Q8IXJ6, O15417	162	0.611867		GOTERM_MF_DIRECT	GO:0043565~sequence-specific DNA binding	11	P41235, Q9UN79, P05412, P56524, Q16649, Q01167, Q96A47, P48431, P01106, Q99607, Q9UPW0	152	0.495213
GOTERM_MF_DIRECT	GO:0051959~dynein light intermediate chain binding	2	Q8TD16, Q5EBL4	115	0.973059		GOTERM_BP_DIRECT	GO:0007165~signal transduction	21	Q9UBI6, P78314, Q92835, Q16512, Q08380, P04626, Q92619, O75674, P14923, P30101, P35568, Q9P227, P21359, P04083, A7KAX9, P31949, Q15642, Q6ZUM4, P09525, P47736, Q16881	156	0.615057		GOTERM_MF_DIRECT	GO:0001077~transcriptional activator activity, RNA polymerase II core promoter proximal region sequence-specific binding	7	P41235, Q00059, P05412, Q01167, P48431, P01106, Q99607	152	0.495213
GOTERM_MF_DIRECT	GO:0005096~GTPase activator activity	6	Q52LW3, P42331, O60343, Q86TI0, Q15642, Q13671	115	0.973059		GOTERM_CC_DIRECT	GO:0016328~lateral plasma membrane	3	P04083, P14923, O00159	162	0.617271		GOTERM_CC_DIRECT	GO:0005938~cell cortex	4	Q8IVT2, O95466, Q96RU3, Q86YS7	148	0.499125
GOTERM_MF_DIRECT	GO:0044325~ion channel binding	4	P07900, Q13557, P07948, Q03135	115	0.973059		GOTERM_MF_DIRECT	GO:0005544~calcium-dependent phospholipid binding	4	P04083, P27216, P09525, P47712	162	0.671531		GOTERM_MF_DIRECT	GO:0017124~SH3 domain binding	5	P78314, Q92835, P07948, Q14195, Q9H2Y7	152	0.514496
GOTERM_MF_DIRECT	GO:0005088~Ras guanyl-nucleotide exchange factor activity	4	Q13557, P00533, P35568, Q05397	115	0.973059		GOTERM_MF_DIRECT	GO:0048306~calcium-dependent protein binding	4	P25815, P04083, P31949, P09525	162	0.671531		GOTERM_MF_DIRECT	GO:0003682~chromatin binding	9	Q00059, P05412, P56524, Q8IXJ6, Q9BTE3, Q16512, P67870, O15417, P26358	152	0.525796
GOTERM_MF_DIRECT	GO:0008432~JUN kinase binding	2	Q9UPT6, Q05397	115	0.973059		GOTERM_MF_DIRECT	GO:0005200~structural constituent of cytoskeleton	5	Q9H4G0, Q13813, P09493, O15143, P26038	162	0.671531		GOTERM_CC_DIRECT	GO:0005903~brush border	3	Q96JP2, Q8N8V4, P47755	148	0.528722
GOTERM_MF_DIRECT	GO:0004871~signal transducer activity	5	Q9UBI6, Q96AX9, P09382, P35568, Q05397	115	0.973059		GOTERM_MF_DIRECT	GO:0019903~protein phosphatase binding	4	Q14764, P04626, P04637, P14923	162	0.671531		GOTERM_CC_DIRECT	GO:0015630~microtubule cytoskeleton	4	Q8IWC1, Q9HC35, O15344, Q9UNS1	148	0.602977
GOTERM_MF_DIRECT	GO:0008017~microtubule binding	5	Q13009, Q86Y91, P11137, O95292, Q9UDT6	115	0.973059		GOTERM_MF_DIRECT	GO:0042803~protein homodimerization activity	14	P05412, Q13557, O75223, Q32MZ4, P14923, O95292, Q9UHY1, O60656, P04083, P31949, P08034, P28715, P47736, Q16584	162	0.671531		GOTERM_MF_DIRECT	GO:0051219~phosphoprotein binding	3	Q8IWS0, P07948, O15344	152	0.666747
GOTERM_MF_DIRECT	GO:0030235~nitric-oxide synthase regulator activity	2	P07900, P00533	115	0.973059		GOTERM_MF_DIRECT	GO:0017124~SH3 domain binding	5	P78314, Q92835, O75674, Q6ZUM4, Q9H2Y7	162	0.738715		GOTERM_MF_DIRECT	GO:0070491~repressing transcription factor binding	3	P56524, P01106, P15923	152	0.666747
GOTERM_BP_DIRECT	GO:0048678~response to axon injury	3	P09382, P07948, Q14195	108	0.983148		GOTERM_BP_DIRECT	GO:0043525~positive regulation of neuron apoptotic process	4	P05412, P21359, P04637, Q16584	156	0.742737		GOTERM_MF_DIRECT	GO:0003779~actin binding	7	Q8IVT2, Q8WX93, P11171, Q96PY5, P13796, P47755, Q05682	152	0.666747
GOTERM_BP_DIRECT	GO:0090630~activation of GTPase activity	4	Q13009, O60343, P21709, Q86TI0	108	0.999365		GOTERM_BP_DIRECT	GO:0042127~regulation of cell proliferation	7	P05412, P38398, P04083, P14923, P31949, P47712, P26358	156	0.742737		GOTERM_MF_DIRECT	GO:0000978~RNA polymerase II core promoter proximal region sequence-specific DNA binding	8	Q00059, P05412, Q01167, P48382, P01106, P15923, Q99607, Q9H165	152	0.666747
GOTERM_BP_DIRECT	GO:0043552~positive regulation of phosphatidylinositol 3-kinase activity	3	P07948, P35568, Q05397	108	1		GOTERM_BP_DIRECT	GO:0006928~movement of cell or subcellular component	5	P09493, O15143, P26038, P47755, O00401	156	0.746552		GOTERM_MF_DIRECT	GO:0001102~RNA polymerase II activating transcription factor binding	3	P41235, P05412, O75376	152	0.679851
GOTERM_BP_DIRECT	GO:0006928~movement of cell or subcellular component	4	O15143, P04792, O00401, Q05682	108	1		GOTERM_MF_DIRECT	GO:0008022~protein C-terminus binding	6	Q05193, Q15599, P04626, P54253, O43933, O00159	162	0.759971		GOTERM_MF_DIRECT	GO:0098641~cadherin binding involved in cell-cell adhesion	7	P25815, Q86W92, Q32MZ4, P31949, Q96PY5, Q14134, Q05682	152	0.679851
GOTERM_BP_DIRECT	GO:0071364~cellular response to epidermal growth factor stimulus	3	Q96SB3, P00533, O60658	108	1		GOTERM_BP_DIRECT	GO:0010628~positive regulation of gene expression	8	O14737, P38398, P0DMV8, P04626, P04637, Q96AE4, P26038, P26358	156	0.840317		GOTERM_MF_DIRECT	GO:0048365~Rac GTPase binding	3	O95466, Q16512, Q765P7	152	0.693166
GOTERM_BP_DIRECT	GO:0001932~regulation of protein phosphorylation	3	Q96SB3, P07948, Q05397	108	1		GOTERM_BP_DIRECT	GO:0007266~Rho protein signal transduction	4	Q52LW3, Q969H4, P23528, Q8TE68	156	0.840317		GOTERM_MF_DIRECT	GO:0015631~tubulin binding	3	P38398, Q8IWS0, Q8IWC1	152	0.720395
GOTERM_BP_DIRECT	GO:0046777~protein autophosphorylation	5	Q13557, P07948, P21709, P00533, Q05397	108	1		GOTERM_BP_DIRECT	GO:0030336~negative regulation of cell migration	5	P21359, P09493, P21709, Q9Y6N7, P58107	156	0.840317		GOTERM_MF_DIRECT	GO:0008603~cAMP-dependent protein kinase regulator activity	2	P10644, P31321	152	0.740573
GOTERM_BP_DIRECT	GO:0038128~ERBB2 signaling pathway	3	P07900, P00533, O75131	108	1		GOTERM_MF_DIRECT	GO:0019899~enzyme binding	8	O60656, P05412, P38398, O95685, P0DMV8, Q9UKK3, P04637, O95292	162	0.921539		GOTERM_MF_DIRECT	GO:0042803~protein homodimerization activity	12	P41235, P05412, P09382, Q32MZ4, P15923, P31949, O15344, P08034, P28715, Q9UNS1, Q9H165, Q01196	152	0.740573
GOTERM_BP_DIRECT	GO:0038083~peptidyl-tyrosine autophosphorylation	3	P07948, P42684, Q05397	108	1		GOTERM_MF_DIRECT	GO:0048487~beta-tubulin binding	3	O14737, Q8IXJ6, O95292	162	0.921539		GOTERM_MF_DIRECT	GO:0004715~non-membrane spanning protein tyrosine kinase activity	3	P07948, P42684, Q86YV5	152	0.740573
GOTERM_BP_DIRECT	GO:0043547~positive regulation of GTPase activity	9	Q52LW3, P42331, Q13557, P00533, Q3MIN7, Q15642, P35568, Q05397, Q13671	108	1		GOTERM_MF_DIRECT	GO:0009008~DNA-methyltransferase activity	2	P16455, P26358	162	0.921539		GOTERM_BP_DIRECT	GO:0016477~cell migration	7	Q68CZ2, Q8WX93, Q6F5E8, O94875, P19174, P13796, P42684	147	0.75574
GOTERM_BP_DIRECT	GO:0071277~cellular response to calcium ion	3	Q13557, Q9UBL6, O75131	108	1		GOTERM_MF_DIRECT	GO:0030165~PDZ domain binding	4	Q8TBB1, Q9UBI6, Q52LW3, Q5VV41	162	0.921539		GOTERM_BP_DIRECT	GO:0006366~transcription from RNA polymerase II promoter	12	Q00059, P05412, Q13951, Q16649, Q01167, P48431, Q96AE4, P01106, Q99607, O75376, Q14134, Q01196	147	0.75574
GOTERM_BP_DIRECT	GO:0021987~cerebral cortex development	3	Q9UBI6, Q96SB3, A6NKD9	108	1		GOTERM_MF_DIRECT	GO:0044212~transcription regulatory region DNA binding	6	P05412, P38398, P48431, P04637, O75376, P55317	162	0.921539		GOTERM_BP_DIRECT	GO:0007067~mitotic nuclear division	8	Q5FBB7, Q8IVT2, Q8IXJ6, Q9Y6G9, O60566, Q9BTE3, Q9HC35, Q9UNS1	147	0.75574
GOTERM_BP_DIRECT	GO:1901844~regulation of cell communication by electrical coupling involved in cardiac conduction	2	Q13557, Q03135	108	1		GOTERM_MF_DIRECT	GO:0048365~Rac GTPase binding	3	O95466, Q16512, Q16584	162	0.921539		GOTERM_BP_DIRECT	GO:0030889~negative regulation of B cell proliferation	3	Q92835, Q16512, P07948	147	0.75574
GOTERM_BP_DIRECT	GO:0061049~cell growth involved in cardiac muscle cell development	2	Q13557, P45985	108	1		GOTERM_MF_DIRECT	GO:0004672~protein kinase activity	8	Q9UHY1, O60566, Q16512, O15530, P04626, P21709, Q13233, Q16584	162	0.921539		GOTERM_BP_DIRECT	GO:0010976~positive regulation of neuron projection development	5	Q9ULH0, P07948, Q14195, P42684, Q9H165	147	0.75574
GOTERM_BP_DIRECT	GO:0098909~regulation of cardiac muscle cell action potential involved in regulation of contraction	2	Q13557, Q03135	108	1		GOTERM_MF_DIRECT	GO:0003697~single-stranded DNA binding	4	Q96AE4, P04083, P28715, Q96QR8	162	0.921539		GOTERM_BP_DIRECT	GO:0008285~negative regulation of cell proliferation	10	P41235, O14737, P05412, P56524, Q8IXJ6, P67870, P07948, Q13118, Q92786, P31949	147	0.75574
GOTERM_BP_DIRECT	GO:0030036~actin cytoskeleton organization	4	Q8WX93, Q6H8Q1, Q15642, P42684	108	1		GOTERM_MF_DIRECT	GO:0030971~receptor tyrosine kinase binding	3	P50616, P04637, Q5VV41	162	0.937982		GOTERM_MF_DIRECT	GO:0001078~transcriptional repressor activity, RNA polymerase II core promoter proximal region sequence-specific binding	4	Q16649, Q92786, P15923, Q9H165	152	0.831424
GOTERM_BP_DIRECT	GO:0051592~response to calcium ion	3	P00533, Q03135, Q14573	108	1		GOTERM_MF_DIRECT	GO:0004674~protein serine/threonine kinase activity	8	Q9UHY1, O60566, Q16512, O15530, Q13557, Q13233, Q96L96, Q16584	162	0.977424		GOTERM_MF_DIRECT	GO:0004862~cAMP-dependent protein kinase inhibitor activity	2	P10644, P31321	152	0.831424
GOTERM_BP_DIRECT	GO:0051056~regulation of small GTPase mediated signal transduction	4	Q52LW3, Q13009, P42331, Q15642	108	1		GOTERM_MF_DIRECT	GO:0042826~histone deacetylase binding	4	Q8IXJ6, P0DMV8, Q16512, O75376	162	0.98861		GOTERM_MF_DIRECT	GO:0008022~protein C-terminus binding	5	Q05193, P08670, P54253, O43933, Q93009	152	0.831424
GOTERM_BP_DIRECT	GO:0003254~regulation of membrane depolarization	2	P30989, Q13557	108	1		GOTERM_MF_DIRECT	GO:0003677~DNA binding	23	P05412, O00712, P48431, Q9UKK3, P04637, P54253, Q32MZ4, Q7L9B9, Q99594, O75376, Q9UKN8, Q86V15, Q8TE77, P55317, Q00059, O14737, P16455, P38398, Q9P2K5, Q9NRG0, Q7Z6Z7, Q9NWS9, P26358	162	0.98861		GOTERM_MF_DIRECT	GO:0033558~protein deacetylase activity	2	P56524, Q8IXJ6	152	0.856487
GOTERM_BP_DIRECT	GO:0046474~glycerophospholipid biosynthetic process	2	Q9UBL6, O75131	108	1		GOTERM_MF_DIRECT	GO:0000981~RNA polymerase II transcription factor activity, sequence-specific DNA binding	5	P05412, O00712, P04637, Q9NWS9, P55317	162	0.997949		GOTERM_BP_DIRECT	GO:0006351~transcription, DNA-templated	28	Q9UN79, Q9NYB0, Q8IWS0, Q13118, P54253, P15923, Q9UKN8, Q9H165, P41235, P38398, Q8IXJ6, Q9UNS1, Q14135, Q9UPW0, P26358, Q14678, P56524, P48382, Q16512, Q9GZT3, Q32MZ4, Q86V15, Q8NB78, Q04726, Q9P2K5, Q92786, Q96RL1, Q96QR8	147	0.864677
GOTERM_BP_DIRECT	GO:0006950~response to stress	3	P07900, O14683, P00533	108	1		GOTERM_MF_DIRECT	GO:0005522~profilin binding	2	Q14247, O95466	162	0.997949		GOTERM_MF_DIRECT	GO:0019887~protein kinase regulator activity	2	Q9ULH0, P67870	152	0.887731
GOTERM_BP_DIRECT	GO:0008104~protein localization	3	Q9Y2D5, Q9UPT6, Q03135	108	1		GOTERM_BP_DIRECT	GO:0006888~ER to Golgi vesicle-mediated transport	6	Q9UHY1, Q13813, P53618, O95292, O43237, P54920	156	1		GOTERM_MF_DIRECT	GO:0042393~histone binding	4	Q8IWS0, Q16512, O14929, Q96RL1	152	0.887731
GOTERM_MF_DIRECT	GO:0051015~actin filament binding	4	Q96SB3, O15143, P00533, P42684	115	1		GOTERM_BP_DIRECT	GO:0006886~intracellular protein transport	7	Q14247, Q8IV36, O60343, O75674, P53618, Q9H1H9, P54920	156	1		GOTERM_BP_DIRECT	GO:0045892~negative regulation of transcription, DNA-templated	11	P05412, P38398, P56524, Q8IXJ6, P54253, Q13118, Q32MZ4, Q92786, Q9UNS1, Q96RL1, Q01196	147	0.939814
GOTERM_BP_DIRECT	GO:2000036~regulation of stem cell population maintenance	2	Q9Y4C1, P52926	108	1		GOTERM_BP_DIRECT	GO:2000483~negative regulation of interleukin-8 secretion	2	P04083, P09525	156	1		GOTERM_BP_DIRECT	GO:0007010~cytoskeleton organization	6	Q71RC2, O95466, Q8WX93, P23528, Q16555, Q96PY5	147	0.939814
GOTERM_BP_DIRECT	GO:0043627~response to estrogen	3	P07900, O15143, Q03135	108	1		GOTERM_BP_DIRECT	GO:0042060~wound healing	4	P21359, P04626, P09493, P58107	156	1		GOTERM_BP_DIRECT	GO:0097150~neuronal stem cell population maintenance	3	Q9NZI8, P48431, Q92786	147	0.939814
GOTERM_MF_DIRECT	GO:0004716~receptor signaling protein tyrosine kinase activity	2	P07948, P00533	115	1		GOTERM_BP_DIRECT	GO:0008360~regulation of cell shape	5	Q8TF72, O95466, P09493, P04083, P26038	156	1		GOTERM_BP_DIRECT	GO:0045893~positive regulation of transcription, DNA-templated	11	P41235, Q00059, P05412, P38398, P56524, P48431, Q92786, P01106, P15923, Q99607, Q01196	147	0.939814
GOTERM_MF_DIRECT	GO:0019903~protein phosphatase binding	3	Q14764, P07900, P00533	115	1		GOTERM_BP_DIRECT	GO:0048013~ephrin receptor signaling pathway	4	Q05193, O15143, P21709, O00401	156	1		GOTERM_BP_DIRECT	GO:0030866~cortical actin cytoskeleton organization	3	O95466, P11171, Q96PY5	147	1
GOTERM_BP_DIRECT	GO:0061099~negative regulation of protein tyrosine kinase activity	2	Q14764, Q03135	108	1		GOTERM_BP_DIRECT	GO:0071681~cellular response to indole-3-methanol	2	P38398, P14923	156	1		GOTERM_BP_DIRECT	GO:0022604~regulation of cell morphogenesis	3	Q71RC2, P23528, Q96PY5	147	1
GOTERM_BP_DIRECT	GO:0033628~regulation of cell adhesion mediated by integrin	2	P07948, Q05397	108	1		GOTERM_BP_DIRECT	GO:0034605~cellular response to heat	3	P0DMV8, P21359, Q9NZM1	156	1		GOTERM_BP_DIRECT	GO:0007596~blood coagulation	6	P41235, O43572, P07948, P10644, P31321, P47755	147	1
GOTERM_MF_DIRECT	GO:0001948~glycoprotein binding	3	P07900, P09382, P00533	115	1		GOTERM_BP_DIRECT	GO:0007154~cell communication	3	P21359, P08034, Q15642	156	1		GOTERM_BP_DIRECT	GO:0048678~response to axon injury	3	P09382, P07948, Q14195	147	1
GOTERM_BP_DIRECT	GO:0016192~vesicle-mediated transport	4	Q9UPT6, O60343, Q15642, O75131	108	1		GOTERM_BP_DIRECT	GO:0010649~regulation of cell communication by electrical coupling	2	Q12797, Q13557	156	1		GOTERM_BP_DIRECT	GO:0042127~regulation of cell proliferation	6	P05412, P38398, P31949, Q9UNS1, P42684, P26358	147	1
GOTERM_BP_DIRECT	GO:0071260~cellular response to mechanical stimulus	3	O95817, P00533, P45985	108	1		GOTERM_BP_DIRECT	GO:0051573~negative regulation of histone H3-K9 methylation	2	P38398, P26358	156	1		GOTERM_BP_DIRECT	GO:0030036~actin cytoskeleton organization	5	Q8WX93, P23528, P11171, Q5M775, P42684	147	1
GOTERM_BP_DIRECT	GO:0048010~vascular endothelial growth factor receptor signaling pathway	3	P07900, P04792, Q05397	108	1		GOTERM_BP_DIRECT	GO:0051496~positive regulation of stress fiber assembly	3	P09493, P21709, P35080	156	1		GOTERM_BP_DIRECT	GO:0010628~positive regulation of gene expression	7	O14737, P38398, Q16649, P08670, Q96AE4, P01106, P26358	147	1
GOTERM_BP_DIRECT	GO:0008284~positive regulation of cell proliferation	7	Q13009, P07948, P21709, P00533, P53602, P35568, Q05397	108	1		GOTERM_BP_DIRECT	GO:0006468~protein phosphorylation	9	Q9UHY1, O60566, Q16512, O15530, P04626, Q13557, Q13233, Q96L96, Q16584	156	1		GOTERM_BP_DIRECT	GO:0098609~cell-cell adhesion	7	P25815, Q86W92, Q32MZ4, P31949, Q96PY5, Q14134, Q05682	147	1
GOTERM_BP_DIRECT	GO:0050709~negative regulation of protein secretion	2	P04083, Q96CC6	108	1		GOTERM_BP_DIRECT	GO:0016458~gene silencing	2	Q8IXJ6, P26358	156	1		GOTERM_BP_DIRECT	GO:0045787~positive regulation of cell cycle	3	Q92786, P01106, P15923	147	1
GOTERM_BP_DIRECT	GO:1900034~regulation of cellular response to heat	3	P07900, Q13557, O95817	108	1		GOTERM_BP_DIRECT	GO:0006469~negative regulation of protein kinase activity	4	P21359, Q16512, O15530, P21709	156	1		GOTERM_BP_DIRECT	GO:0006357~regulation of transcription from RNA polymerase II promoter	9	P41235, P38398, Q13951, Q01167, P48382, Q16512, Q32MZ4, P10644, Q9UPW0	147	1
GOTERM_BP_DIRECT	GO:0060402~calcium ion transport into cytosol	2	Q9HDC5, Q14573	108	1		GOTERM_BP_DIRECT	GO:0030838~positive regulation of actin filament polymerization	3	Q14247, P35080, O00159	156	1		GOTERM_BP_DIRECT	GO:0050852~T cell receptor signaling pathway	5	O43561, Q92835, Q6F5E8, P19174, Q9H400	147	1
GOTERM_BP_DIRECT	GO:0003382~epithelial cell morphogenesis	2	Q8WX93, Q5EBL4	108	1		GOTERM_BP_DIRECT	GO:0031532~actin cytoskeleton reorganization	3	Q14247, Q8IY33, P04083	156	1		GOTERM_BP_DIRECT	GO:0007165~signal transduction	17	O43561, O43572, P78314, Q92835, Q16512, Q08380, P19174, P07948, Q9H165, Q9P227, Q01196, Q04726, P09382, P67870, P31949, Q16555, P42684	147	1
GOTERM_BP_DIRECT	GO:0000165~MAPK cascade	5	Q13557, P00533, Q03135, P35568, Q05397	108	1		GOTERM_BP_DIRECT	GO:0046777~protein autophosphorylation	5	O15530, P04626, Q13557, P21709, Q16584	156	1		GOTERM_BP_DIRECT	GO:0045944~positive regulation of transcription from RNA polymerase II promoter	15	P05412, Q13951, P56524, P48431, P15923, Q9H165, Q01196, P41235, Q00059, P38398, Q8IXJ6, Q01167, Q92786, P01106, Q99607	147	1
GOTERM_BP_DIRECT	GO:0031295~T cell costimulation	3	P09382, P07948, Q03135	108	1		GOTERM_BP_DIRECT	GO:0000733~DNA strand renaturation	2	P04637, P04083	156	1		GOTERM_BP_DIRECT	GO:0010216~maintenance of DNA methylation	2	Q93009, P26358	147	1
GOTERM_MF_DIRECT	GO:0050998~nitric-oxide synthase binding	2	Q13557, Q03135	115	1		GOTERM_BP_DIRECT	GO:0007184~SMAD protein import into nucleus	2	P05412, P50616	156	1		GOTERM_BP_DIRECT	GO:0051573~negative regulation of histone H3-K9 methylation	2	P38398, P26358	147	1
GOTERM_MF_DIRECT	GO:0005102~receptor binding	6	P07948, P04083, P30484, Q03135, P42684, Q05397	115	1		GOTERM_BP_DIRECT	GO:1900119~positive regulation of execution phase of apoptosis	2	Q8IXJ6, P04637	156	1		GOTERM_BP_DIRECT	GO:0006348~chromatin silencing at telomere	2	Q8IXJ6, O14929	147	1
GOTERM_BP_DIRECT	GO:0006198~cAMP catabolic process	2	P27815, O60658	108	1		GOTERM_BP_DIRECT	GO:0071277~cellular response to calcium ion	3	P05412, Q12797, Q13557	156	1		GOTERM_BP_DIRECT	GO:0051574~positive regulation of histone H3-K9 methylation	2	P38398, P16401	147	1
GOTERM_BP_DIRECT	GO:0060441~epithelial tube branching involved in lung morphogenesis	2	Q8TDM6, P52926	108	1		GOTERM_MF_DIRECT	GO:0005198~structural molecule activity	6	Q9H4G0, Q12797, P04083, P14923, P53618, P05783	162	1		GOTERM_BP_DIRECT	GO:0034983~peptidyl-lysine deacetylation	2	P56524, Q8IXJ6	147	1
GOTERM_BP_DIRECT	GO:0051044~positive regulation of membrane protein ectodomain proteolysis	2	Q9UKS6, O43847	108	1		GOTERM_BP_DIRECT	GO:0043281~regulation of cysteine-type endopeptidase activity involved in apoptotic process	2	P16455, P48431	156	1		GOTERM_BP_DIRECT	GO:0045656~negative regulation of monocyte differentiation	2	Q92835, P01106	147	1
GOTERM_BP_DIRECT	GO:0007095~mitotic G2 DNA damage checkpoint	2	P52926, Q9NVI1	108	1		GOTERM_BP_DIRECT	GO:0031953~negative regulation of protein autophosphorylation	2	P05412, Q14764	156	1		GOTERM_BP_DIRECT	GO:0016458~gene silencing	2	Q8IXJ6, P26358	147	1
GOTERM_BP_DIRECT	GO:0098609~cell-cell adhesion	5	O95817, O95292, Q09666, Q96PY5, Q05682	108	1		GOTERM_BP_DIRECT	GO:0006461~protein complex assembly	4	Q15599, P04637, P47755, O00401	156	1		GOTERM_BP_DIRECT	GO:0000186~activation of MAPKK activity	3	Q9ULH0, P19174, Q13233	147	1
GOTERM_MF_DIRECT	GO:0004115~3',5'-cyclic-AMP phosphodiesterase activity	2	P27815, O60658	115	1		GOTERM_BP_DIRECT	GO:0000165~MAPK cascade	6	P21359, Q13813, P04626, Q13557, Q13233, P35568	156	1		GOTERM_BP_DIRECT	GO:2000480~negative regulation of cAMP-dependent protein kinase activity	2	P10644, P31321	147	1
GOTERM_MF_DIRECT	GO:0017016~Ras GTPase binding	2	Q3MIN7, Q13671	115	1		GOTERM_BP_DIRECT	GO:0007016~cytoskeletal anchoring at plasma membrane	2	Q9H4G0, P14923	156	1		GOTERM_BP_DIRECT	GO:0042752~regulation of circadian rhythm	3	Q13118, Q92786, Q9UNS1	147	1
GOTERM_BP_DIRECT	GO:0046328~regulation of JNK cascade	2	Q9UPT6, O95819	108	1		GOTERM_BP_DIRECT	GO:0045176~apical protein localization	2	Q8TF72, P54920	156	1		GOTERM_BP_DIRECT	GO:0038095~Fc-epsilon receptor signaling pathway	5	P05412, O43561, P19174, P07948, Q13233	147	1
GOTERM_BP_DIRECT	GO:0010592~positive regulation of lamellipodium assembly	2	P07900, Q6F5E8	108	1		GOTERM_BP_DIRECT	GO:0010941~regulation of cell death	2	P05412, P0DMV8	156	1		GOTERM_BP_DIRECT	GO:0070933~histone H4 deacetylation	2	P56524, Q8IXJ6	147	1
							GOTERM_MF_DIRECT	GO:0005088~Ras guanyl-nucleotide exchange factor activity	4	Q13813, P04626, Q13557, P35568	162	1		GOTERM_BP_DIRECT	GO:0048935~peripheral nervous system neuron development	2	Q96A47, Q01196	147	1
														GOTERM_BP_DIRECT	GO:0060252~positive regulation of glial cell proliferation	2	P07948, P01106	147	1
														GOTERM_BP_DIRECT	GO:0051639~actin filament network formation	2	Q6F5E8, P13796	147	1
														GOTERM_BP_DIRECT	GO:0051301~cell division	7	Q5FBB7, Q8IVT2, Q8IXJ6, Q9Y6G9, O60566, Q9BTE3, Q9UNS1	147	1
														GOTERM_BP_DIRECT	GO:0051764~actin crosslink formation	2	Q14195, P13796	147	1
														GOTERM_BP_DIRECT	GO:0048661~positive regulation of smooth muscle cell proliferation	3	P05412, P56524, P01106	147	1
														GOTERM_BP_DIRECT	GO:0050777~negative regulation of immune response	2	Q92835, P07948	147	1
														GOTERM_BP_DIRECT	GO:0044319~wound healing, spreading of cells	2	Q6F5E8, P13796	147	1
