# Supplementary material for: Characterisation of Colorectal Cancer Cell Lines through Proteomic Profiling of Their Extracellular Vesicles
Source: Proteomes. 2023 Jan 11;11(1):3. doi: 10.3390/proteomes11010003 (PMC9844407; doi:10.3390/proteomes11010003)
Supplement: Supplementary file 1 [file proteomes-11-00003-s001.zip › Table S8.xlsx]

## Sheet: KEGG
KEGG pathway analysis of phosphoproteomics
UP in HCT116 vs SW620 and UP in HCT116 vs HT29						UP in HT29 vs HCT116 and UP in HT29 vs SW620						SW620_vs_HCT116_UP_AND_SW620_vs_HT29_UP
KEGG pathway analysis of 127 proteins						KEGG pathway analysis of 171 proteins						KEGG pathway analysis of 161 proteins
Term	Gene count	Gene Uniprot ID	List Total	Benjamini		Term	Gene count	Gene Uniprot ID	List Total	Benjamini		Term	Gene count	Gene Uniprot ID	List Total	Benjamini
hsa05205:Proteoglycans in cancer	7	Q13009, Q13557, P16070, P00533, Q03135, Q05397, Q14573	43	0.127795		hsa05132:Salmonella infection	6	P05412, Q16512, O15143, O43237, P35080, O00401	76	0.377389		hsa04666:Fc gamma R-mediated phagocytosis	5	O43561, Q92835, P23528, P19174, P07948	57	0.558254
hsa04012:ErbB signaling pathway	5	Q13557, P00533, P45985, P42684, Q05397	43	0.127795		hsa05131:Shigellosis	5	Q14247, O15143, P16070, P35080, O00401	76	0.377389		hsa05169:Epstein-Barr virus infection	5	P05412, P08670, P07948, P01106, Q93009	57	0.664192
hsa04810:Regulation of actin cytoskeleton	6	Q9UBI6, Q13009, O15143, P00533, Q05397, O00401	43	0.394657		hsa05205:Proteoglycans in cancer	8	Q14247, O15530, P04626, P04637, Q13557, P16070, P26038, Q14573	76	0.377389		hsa04664:Fc epsilon RI signaling pathway	4	O43561, Q92835, P19174, P07948	57	0.664192
hsa05100:Bacterial invasion of epithelial cells	4	O15143, Q03135, Q05397, O00401	43	0.404425		hsa04722:Neurotrophin signaling pathway	6	P05412, O15530, P04637, Q13557, Q13233, P35568	76	0.465957		hsa05132:Salmonella infection	4	P05412, Q9Y6G9, Q16512, O43237	57	0.664192
hsa04912:GnRH signaling pathway	4	Q13557, P00533, P45985, Q14573	43	0.416667		hsa04360:Axon guidance	6	O14639, P23528, Q6H8Q1, P21709, Q9Y6N7, O94929	76	0.468986		hsa04064:NF-kappa B signaling pathway	4	O43561, P67870, P19174, P07948	57	0.664192
hsa04010:MAPK signaling pathway	6	Q9UBI6, Q9UPT6, P00533, P45985, P04792, O95819	43	0.416667		hsa04912:GnRH signaling pathway	5	P05412, Q13557, Q13233, Q14573, P47712	76	0.543248		hsa04012:ErbB signaling pathway	4	P05412, P19174, P01106, P42684	57	0.664192
hsa04062:Chemokine signaling pathway	5	Q9UBI6, Q13009, P07948, Q05397, O00401	43	0.513141		hsa04010:MAPK signaling pathway	8	P05412, Q9UBI6, P0DMV8, P21359, P04637, Q13233, Q16584, P47712	76	0.543248		hsa04722:Neurotrophin signaling pathway	4	P05412, Q9ULH0, P19174, Q13233	57	1
hsa05169:Epstein-Barr virus infection	4	P07948, P16070, P30484, P45985	43	0.652774		hsa05223:Non-small cell lung cancer	4	O15530, P04626, P04637, Q9HC35	76	0.548027		hsa05206:MicroRNAs in cancer	6	P38398, Q9NZI8, P08670, P19174, P01106, P26358	57	1
hsa05416:Viral myocarditis	3	P30484, Q03135, P42684	43	0.661727		hsa04810:Regulation of actin cytoskeleton	7	Q9UBI6, P23528, O15143, Q8TE77, P26038, P35080, O00401	76	0.564422
hsa04014:Ras signaling pathway	5	Q9UBI6, Q13009, P00533, P42684, Q13671	43	0.661727		hsa04931:Insulin resistance	5	O95685, O15530, O60343, Q06210, P35568	76	0.572592
hsa05131:Shigellosis	3	O15143, P16070, O00401	43	0.665682		hsa05100:Bacterial invasion of epithelial cells	4	Q05193, Q14247, O15143, O00401	76	0.924239
hsa04144:Endocytosis	5	O15143, P30484, P00533, Q03135, O00401	43	0.665682		hsa04666:Fc gamma R-mediated phagocytosis	4	Q92835, P23528, O15143, O00401	76	0.944914
hsa05120:Epithelial cell signaling in Helicobacter pylori infection	3	P07948, P00533, P45985	43	0.665682		hsa04960:Aldosterone-regulated sodium reabsorption	3	Q15599, O15530, P35568	76	0.944914
hsa05132:Salmonella infection	3	Q9Y6G9, O15143, O00401	43	0.820788		hsa04530:Tight junction	4	O95049, Q14247, Q9UDY2, Q9P2M7	76	0.944914
hsa04666:Fc gamma R-mediated phagocytosis	3	P07948, O15143, O00401	43	0.820788		hsa05206:MicroRNAs in cancer	7	P38398, P04626, P04637, P09493, P16070, P35568, P26358	76	1
hsa04020:Calcium signaling pathway	4	P30989, Q13557, P00533, Q14573	43	0.820788		hsa05231:Choline metabolism in cancer	4	P05412, O15530, O00401, P47712	76	1
